# Supplementary material for: Anatomical Transcriptome Atlas of the Male Mouse Reproductive System During Aging
Source: Front Cell Dev Biol. 2022 Feb 8;9:782824. doi: 10.3389/fcell.2021.782824 (PMC8861499; doi:10.3389/fcell.2021.782824)
Supplement: Supplementary file 1 [file Table2.XLSX]

## Sheet: PCA3M
AccID	ENSMUSG00000029836	ENSMUSG00000029830	ENSMUSG00000029832	ENSMUSG00000029833	ENSMUSG00000029838	ENSMUSG00000030826	ENSMUSG00000030823	ENSMUSG00000030824	ENSMUSG00000030822	ENSMUSG00000005871	ENSMUSG00000029823	ENSMUSG00000029826	ENSMUSG00000029821	ENSMUSG00000005873	ENSMUSG00000029822	ENSMUSG00000030816	ENSMUSG00000029828	ENSMUSG00000030814	ENSMUSG00000030815	ENSMUSG00000054808	ENSMUSG00000030811	ENSMUSG00000005846	ENSMUSG00000029814	ENSMUSG00000029815	ENSMUSG00000029810	ENSMUSG00000029811	ENSMUSG00000029816	ENSMUSG00000030805	ENSMUSG00000029817	ENSMUSG00000030806	ENSMUSG00000030801	ENSMUSG00000030802	ENSMUSG00000054814	ENSMUSG00000029802	ENSMUSG00000029804	ENSMUSG00000054823	ENSMUSG00000030869	ENSMUSG00000030867	ENSMUSG00000030868	ENSMUSG00000030865	ENSMUSG00000015222	ENSMUSG00000015224	ENSMUSG00000030861	ENSMUSG00000030862	ENSMUSG00000029860	ENSMUSG00000029862	ENSMUSG00000029869	ENSMUSG00000029863	ENSMUSG00000029864
3M-Dd1	4.5362	0.248303	3.0937	24.7189	4.06759	11.9871	3.00984	74.2022	18.8821	14.9971	90.7396	23.0422	0.504415	30.7678	1.77684	9.8929	0.925584	3.6799	13.2492	71.8764	16.3585	19.5808	0.0307011	7.45297	44.6813	4.61774	6.48779	20.889	29.0528	3.82308	9.50417	14.8675	9.99486	492.145	13.7034	17.6696	9.70085	0.54596	16.5281	3.0234	3.65571	1.89364	28.6601	27.1521	46.8435	0.564441	9.07747	11.2455	17.2956
3M-Dd2	5.36334	0.451553	4.69292	22.1805	2.75925	8.37104	2.6139	79.2488	18.1309	14.2741	79.5535	22.4926	0.535407	27.6581	1.78062	8.84712	1.4209	3.35994	18.4781	71.8718	13.3428	24.8616	0.120968	6.15291	59.0033	3.60714	9.6572	20.6282	25.432	3.41003	9.93865	15.7892	9.66714	552.939	13.9191	16.132	8.37415	0.921938	16.6593	3.5068	3.61156	2.36867	27.7948	32.6278	37.1901	0.487164	7.94379	12.1918	16.7816
3M-Dd3	4.65666	0.269716	3.28264	24.8083	3.31377	11.4657	2.963	82.1714	19.527	14.459	80.4176	24.6257	0.352752	30.1365	1.5857	10.6929	0.897751	4.07857	15.6811	74.3047	17.0727	19.2727	0.014451	6.63759	50.75	4.21408	5.921	21.1312	28.2952	4.24966	10.6572	15.0843	9.75375	522.692	14.7452	18.4237	8.93387	1.14215	15.7601	3.57936	3.06022	2.2531	28.4056	30.4615	46.206	0.301108	8.82929	12.6683	19.6555
3M-Dd4	5.57755	0.31986	3.14655	22.153	3.0323	10.1682	3.26426	82.0766	20.8738	13.5505	81.6332	23.0063	0.348612	34.9718	1.79642	9.81515	0.652365	4.00085	15.1412	76.3457	18.9005	18.4723	0.0714073	7.26409	48.0458	4.64685	6.75691	21.5225	29.0115	3.85779	10.8858	16.511	10.818	515.451	13.1294	17.9619	8.16908	1.24162	14.6094	3.4095	3.08381	1.85963	26.6641	31.8602	45.5275	0.560139	7.86795	10.8843	13.913
3M-Ed1	6.51884	12.4124	0.510595	15.9329	3.23389	13.4695	8.77934	67.3517	27.409	13.1073	45.8935	16.4139	1.27041	17.8593	13.191	18.6359	1.29372	5.20832	26.3056	116.788	13.8197	20.8086	0.377626	9.40973	105.577	8.42803	2.99251	22.6322	24.3649	4.03926	10.2614	18.5923	7.24351	4.34089	9.23397	17.7055	12.5374	1.92756	18.6329	3.05206	1.68239	3.82807	11.5349	17.2185	43.4686	1.25354	2.39881	11.8754	6.31749
3M-Ed2	5.82974	11.3033	0.389832	13.4783	3.64437	13.1214	7.04119	73.3633	28.9565	12.4134	42.082	16.9702	1.12859	20.1728	11.8609	20.2768	1.52917	4.65513	24.3021	123.926	15.0172	17.8121	0.213031	8.2791	118.39	7.84699	2.14371	24.4755	23.6501	5.80115	10.7192	17.6697	5.87477	4.27895	8.62255	18.4312	14.0061	1.50331	19.2331	2.76995	2.17638	4.27561	11.0356	17.0676	47.1187	0.690064	2.51316	10.4166	6.58314
3M-Ed3	6.49353	12.824	0.100587	16.8242	4.02646	11.2207	6.86253	61.5609	26.1273	13.3377	50.1648	18.3095	1.0782	17.0875	12.2548	18.2867	2.36739	5.10965	37.6235	108.278	14.7414	18.6493	0.60366	9.25899	104.578	6.41766	3.14594	22.1885	29.1494	4.71055	12.3571	16.6462	7.34518	6.06498	9.5872	19.3408	12.9454	2.82192	18.2015	2.6802	3.07701	3.55687	12.5821	17.7947	37.7458	0.721842	1.63249	12.7258	6.55314
3M-Ed4	6.45363	13.5936	0.28155	16.6734	2.06189	13.0167	7.01857	63.4511	26.8646	13.7498	50.0801	18.4519	1.50547	17.6625	13.6166	17.4906	1.06791	4.71	22.9498	117.953	12.6975	21.2251	0.119889	8.45408	112.055	6.6932	2.69186	21.3323	24.547	4.57929	10.9281	17.2684	7.84732	5.21648	10.4052	19.6343	13.1952	1.68784	18.2405	1.92304	2.43479	3.31223	12.3248	16.3253	36.2952	0.38573	2.40589	12.1041	5.97042
3M-Ca1	4.17921	2.0399	25.2004	8.56197	0.510533	14.7761	5.18912	132.666	21.6982	9.08734	43.296	22.7046	0.230877	14.5018	0.822681	16.5635	1.44783	3.85585	22.9645	71.2577	26.4606	20.2957	0.191267	7.28589	75.9302	0.859697	20.2415	20.3442	24.1017	2.2509	11.1654	16.4572	8.23136	3.02153	8.53213	14.5803	7.50757	1.16077	14.6389	0.937709	0.531195	1.07674	16.4875	10.5384	38.0968	0.686545	23.4793	10.8159	18.3696
3M-Ca2	2.73733	0.917459	11.0942	4.0952	0.745506	4.39866	1.7703	75.6514	10.1305	6.43185	33.7369	9.48873	0.197788	5.13982	0.399372	5.90994	0.609471	1.15001	8.43138	34.3133	5.61469	15.256	0.228226	2.67887	30.5491	0.404169	9.17175	10.8448	14.7405	0.857647	4.58937	7.07915	3.76732	1.06741	3.45042	8.39421	2.65303	0.381574	6.57482	0.261951	0.280352	0.601578	6.3849	6.14951	13.8539	0.193659	8.15115	3.2639	7.48594
3M-Ca3	5.8517	2.11088	24.7084	11.7747	0.589939	8.31148	4.07094	125.602	19.9108	13.3185	67.1025	21.2605	0.413861	16.7665	0.509444	12.6988	0.976297	2.55994	17.9751	72.218	11.7644	28.0506	0.587756	5.78556	76.9887	0.820076	26.127	15.6264	25.9407	1.21558	6.9105	12.8866	9.12631	2.86296	9.49559	15.5139	8.04131	0.527884	15.7725	0.518222	0.85327	1.60207	15.7964	10.2708	24.9241	0.37657	17.8967	10.822	17.6285
3M-Ca4	5.8104	1.92908	25.7984	10.6344	0.601929	9.24876	4.64871	133.335	19.1238	11.8375	72.3768	21.2424	0.291112	14.4317	0.661907	13.4898	1.45685	2.52095	18.6647	64.4369	11.3651	33.2817	0.457727	6.62266	69.5667	0.815825	18.6174	15.4661	28.6566	1.35779	9.42628	12.2659	9.00453	2.01994	7.29564	15.7199	7.59761	0.787722	14.2596	0.660943	0.645861	1.2649	15.9097	9.15198	26.9059	0.416242	16.3885	10.1805	14.9359
3M-Is1	6.5515	1.38242	9.51533	13.2413	0.683761	9.81693	1.98449	77.5886	23.8839	16.0031	55.9304	17.9293	0.10582	18.2279	1.1743	16.2879	0.941462	3.20918	18.0195	77.4152	9.68444	18.6327	0.161018	6.552	89.4483	0.716676	14.0643	17.7789	21.2399	1.24933	8.32991	13.6021	12.064	5.32336	16.5922	16.8242	7.2999	1.11354	19.1796	0.624664	2.47071	1.1311	11.5051	7.60026	31.1407	0.39471	11.0839	11.7562	10.3741
3M-Is2	7.34277	1.88178	11.4102	12.7796	0.647804	9.17109	1.60607	76.9688	19.1024	16.9349	66.156	19.3705	0.234588	18.5402	1.19667	14.3529	1.44174	2.87766	19.2455	74.9743	9.30637	25.0009	0.14466	7.76337	84.0122	0.686255	20.6886	15.1093	25.1311	1.09595	8.06992	13.8783	14.4963	6.72656	18.431	18.9037	6.86544	1.3772	18.9937	0.627921	1.91748	1.39698	14.2547	7.35088	23.3905	0.644748	10.3285	11.8362	14.5308
3M-Is3	7.04984	1.53796	6.30922	13.9059	0.620311	10.2351	1.62094	84.7591	22.9177	15.4476	59.1206	18.726	0.118682	21.531	1.13713	16.5781	0.821249	3.5531	16.8005	89.8042	11.3141	20.7405	0.140458	6.94939	82.1374	0.538936	11.8727	19.7003	22.459	1.15708	8.92826	14.6434	15.5342	6.70391	15.6733	17.6353	7.29753	1.60968	19.0929	0.796396	2.34052	1.85301	11.5414	7.55449	26.6859	0.482035	11.9884	10.4799	9.7052
3M-Is4	5.16394	2.44409	14.488	11.2145	0.444866	10.4203	1.87477	84.7151	21.9245	14.4097	56.2637	19.5262	0.177585	19.8793	0.817757	14.3231	1.14318	2.79853	18.9859	73.5588	7.88302	24.053	0.305553	7.19892	92.6057	0.424298	36.1284	15.0235	22.5144	0.919874	7.5272	13.5724	12.9029	6.07102	17.7728	17.036	6.75999	0.603742	16.6755	0.347365	1.91944	2.36827	13.2762	8.04262	23.2416	0.410175	10.4527	10.3009	13.1332
3M-Co1	5.0758	2.17258	2.55253	9.06662	1.85994	6.42626	1.98948	83.7021	18.2549	8.32181	33.8928	16.7106	0.138923	18.1062	0.613828	12.2887	1.67628	3.49567	18.9059	57.4778	15.7511	14.214	0.266348	7.48076	104.399	1.52161	5.3853	21.9463	16.8541	5.55623	10.5459	17.1638	4.92582	1.72064	4.64772	10.8863	8.24228	0.818653	13.5463	2.38451	0.914369	1.24226	26.6542	6.28599	19.9253	0.399001	2.4439	6.52226	12.1126
3M-Co2	4.58857	2.59303	3.31383	10.0268	2.00183	5.49152	1.46537	76.679	17.7306	9.33724	42.1405	18.3401	0.12144	14.781	0.625049	11.7229	2.44222	2.3136	20.3491	56.4071	13.0349	19.3281	0.445538	5.4273	85.6376	1.61026	11.7099	22.6028	16.3042	5.20394	10.0453	14.7086	5.06115	1.57292	5.51743	11.9333	7.52095	0.880338	13.5311	1.80136	0.558812	1.28046	29.8424	7.24802	20.9006	0.229003	2.77211	5.94567	11.3622
3M-Co3	5.46851	2.01361	4.00448	12.0266	1.96964	7.44958	1.39915	71.6921	20.238	10.1172	50.7449	20.236	0.17945	17.4861	0.630907	12.7325	3.51569	3.10797	21.2748	59.6505	12.9406	21.6341	0.191138	6.5599	101.662	1.46679	10.2924	24.9072	21.1205	6.76211	10.0284	16.927	7.28012	1.71416	6.17912	13.621	10.0102	0.402847	16.0178	2.50974	0.778561	1.70291	37.1476	8.26221	19.1385	0.390454	3.01704	7.68759	10.7877
3M-Co4	5.43624	1.70817	2.86574	9.72891	1.87845	3.95453	1.15361	40.6861	12.3936	8.08822	49.8414	15.394	0.0596702	11.5843	0.33169	6.88422	2.39225	1.60333	14.398	32.2808	6.0373	17.0945	0.216093	5.66218	67.8989	0.838898	5.22312	16.3113	17.2195	3.95723	8.18492	11.2246	4.53456	1.31387	4.72806	9.6032	6.76294	0.552558	11.8131	1.44146	0.776654	0.936483	28.8006	3.88415	11.0357	0.155799	1.36535	4.78906	8.4666
3M-Cd1	5.59063	1.41176	4.38216	13.4717	1.44542	5.94938	1.47348	66.9183	17.7952	9.73314	44.7458	20.43	0.302621	10.9758	0.923046	12.2039	1.86109	2.21928	35.517	50.3713	14.0168	22.0052	0.631769	6.02143	75.9073	0.732173	112.406	14.4285	18.8561	1.29679	11.2468	17.9169	4.93052	1.95981	8.62046	12.629	8.01912	1.09546	12.1834	2.69332	0.760913	1.50214	37.8265	15.7429	23.3714	0.22124	5.80761	6.98478	16.1723
3M-Cd2	5.09691	0.999545	4.78127	13.5026	2.56362	9.60622	1.69101	58.0068	16.4908	10.9574	50.3608	25.1589	0.434233	21.7278	1.82418	11.5808	1.40107	2.37495	26.7182	62.4608	12.3171	22.0241	0.32863	7.24144	83.1142	0.429656	1186.73	20.631	19.8947	1.77216	9.47844	15.7801	5.08982	4.31998	7.82488	13.0839	8.51268	1.49107	16.334	4.24969	0.743669	1.58488	26.9947	16.2072	32.4145	0.223773	4.70932	9.15634	10.1906
3M-Cd3	5.02422	1.2747	5.24913	11.8819	2.15227	6.55773	1.49519	71.8447	17.5561	9.70619	41.4653	20.9683	0.291074	11.4953	0.775632	12.0489	1.37926	2.31083	31.0557	56.3485	14.6705	20.8982	0.660504	5.87978	77.2986	0.765475	134.499	16.7743	19.0489	1.48489	10.7939	18.8178	5.25368	2.11042	8.17072	12.9368	8.65323	1.17192	12.5272	2.65492	0.645778	1.31642	36.9465	17.0952	24.7835	0.247825	5.97836	7.56803	16.2785
3M-Cd4	4.97074	1.28677	6.08897	11.4239	2.08018	8.38127	1.93623	71.1723	19.4945	9.75494	39.8003	23.0443	0.383255	11.8901	1.15625	12.5885	2.38682	2.39908	34.4938	58.9252	18.609	20.3664	0.653148	5.83055	85.277	0.835372	139.765	17.0142	21.0709	1.25129	10.0349	18.6313	4.99143	2.09936	8.448	12.6555	8.53118	1.23678	12.2446	3.08612	0.689679	2.23811	35.7308	17.8824	23.961	0.383594	6.47498	8.8124	18.2537
3M-Te1	5.5382	0.187497	0.621967	84.002	0.319946	13.896	0.239181	7.9262	22.5787	5.27672	49.0707	2.8583	0.589472	4.63792	0.159635	24.0095	176.35	4.55044	549.199	15.1427	11.0741	18.1217	32.2974	3.83227	12.4154	0.173456	0.0147424	2.36083	34.497	0.300714	49.7584	1.76263	11.1703	8.67525	1.86831	8.29896	5.42635	35.0593	13.9996	7.45724	15.4233	0.172118	7.59967	0.187175	9.43017	0.600253	0.493113	3.72608	2.50139
3M-Te2	5.16395	0.234682	1.42947	78.4257	0.50058	13.1433	0.237738	8.69663	22.0913	4.65895	44.8486	2.41386	0.531229	5.38033	0.189292	27.4968	160.809	5.1589	494.595	14.4661	11.1554	19.5397	31.2031	4.06993	12.2765	0.054277	0.0276787	3.02532	30.7343	0.553296	47.2295	1.60954	11.2644	8.14385	1.98122	7.9224	6.36009	36.9879	15.0429	8.23168	16.5329	0.141378	6.7467	0.0878548	8.51514	0.823555	0.449293	3.52686	2.64169
3M-Te3	5.02479	0.249502	1.24148	81.8155	0.319315	12.3509	0.266793	7.75347	23.0329	5.40745	45.3761	2.76455	0.600075	6.13406	0.109008	22.9925	124.983	5.36242	544.595	13.638	11.7103	22.4815	30.6671	5.50527	13.8448	0.192348	0.0294266	2.54317	32.1577	0.288116	48.4188	2.19095	11.1252	8.63908	1.68046	9.08552	6.9026	38.8036	13.0594	6.69453	18.1687	0.214723	7.1638	0.0934028	9.51405	0.798759	0.477665	3.62614	2.61347
3M-Te4	6.02089	0.237013	1.48724	80.8665	0.277332	14.119	0.365866	9.06319	21.1416	5.52584	55.3509	2.79805	0.779211	5.18864	0.254897	33.3833	153.91	5.25281	510.916	15.6296	12.7945	18.2369	33.3074	4.23618	14.5284	0.0626469	0.0479204	2.55798	35.5675	0.390991	47.9233	1.90983	11.8161	8.28291	2.01183	8.34846	5.65859	37.2074	15.1451	7.34913	15.2754	0.209803	8.80789	0.101403	9.86533	1.00058	0.675722	3.71895	1.90566
[truncated: 5,000 more columns]
