# Supplementary material for: Anatomical Transcriptome Atlas of the Male Mouse Reproductive System During Aging
Source: Front Cell Dev Biol. 2022 Feb 8;9:782824. doi: 10.3389/fcell.2021.782824 (PMC8861499; doi:10.3389/fcell.2021.782824)
Supplement: Supplementary file 2 [file Table3.XLSX]

## Sheet: 3m热图-卡4倍差异倍数
Gene name	Ca-1	Ca-2	Ca-3	Ca-4	Co-1	Co-2	Co-3	Co-4	Ed1	Ed2	Ed3	Ed4	Is1	Is2	Is3	Is4	Te1	Te2	Te3	Te4	Cd1	Cd2	Cd3	Cd4	Dd1	Dd2	Dd3	Dd4
Cdc45	1.75	0.96	1.68	1.44	1.02	1.63	1.06	0.88	3.19	3.64	4	2.16	1.4	2.19	1.57	1.36	15.89	18.09	19.29	19.53	1.66	1.78	1.9	1.49	2.29	1.4	1.48	2.14
Scml2	0.42	0.06	0.5	0.48	0.25	0.26	0.31	0.17	0.51	0.44	0.59	0.42	0.22	0.32	0.13	0.29	7.95	7.71	7.37	7.78	0.4	0.47	0.38	0.3	0.49	0.39	0.28	0.43
Apoh	0.2	0	0.05	0.27	0.11	0.1	0.19	0.05	0.23	0.39	0.97	0.38	0.06	0.1	0.15	0.27	24.85	26.38	29.15	24.84	0.75	0.44	0.22	0.56	0.47	0.73	0.26	0.5
Wnt3	0.27	0.07	0.17	0.15	0.69	0.28	0.18	0.14	0.02	0.04	0.17	0.11	0.05	0.07	0.02	0.08	11.14	11.07	9.05	10.01	0.98	0.65	0.43	0.73	0.06	0	0	0.15
Pih1d2	1.47	0.72	2.02	2.02	1.12	1.25	1.26	1.15	20.01	18.38	18.77	18.8	2.81	3.48	3.84	1.91	28.32	24.87	25.6	26.17	1.54	1.61	1.17	2.14	1.39	1.56	1.58	1.41
Fgf23	0	0	0	0	0	0	0	0	0	0.04	0	0	0	0	0	0	0	0	0	0.07	0.16	0.26	0	0.15	0	0	0	0
Ccnd2	10.34	4.59	10.88	9.21	100.9	78.54	95.95	68.89	18.06	17.16	17.05	17.78	6.01	6.17	8.59	6.47	1.53	1.45	1.58	1.69	43.76	38.54	29.88	38.37	25.94	26.3	25.76	22.45
Btbd17	0.98	0.25	1.15	0.3	0.02	0.04	0	0.02	0.11	0.02	0.02	0.04	1.67	1.65	1.86	2.66	0	0.05	0	0.12	0.02	0	0.04	0.04	0.02	0	0	0
Slfn4	0.03	0	0	0.06	0.02	0.08	0.04	0.07	0.05	0.02	0.05	0.05	0.02	0.07	0.06	0.02	0.03	0.09	0.04	0.18	0.07	0.12	0.73	0.14	0.16	0.05	0.09	0.19
Th	0.09	0	0.03	0.03	1.22	1.92	1.28	0.91	0.7	1.02	1.28	0.47	0.04	0	0.13	0.03	0.14	0.11	0.14	0.12	3.67	2.46	0.68	3.19	0.23	0.31	0.48	0.19
Tpd52l1	29.54	21.52	46.64	37.52	9.63	11.65	9.74	9.16	5.91	7.43	7.48	6.37	83.82	82.43	88.98	83.52	8.93	7.13	7.62	7.46	21.65	21.9	14.11	20.3	14.26	12.8	14.66	12.28
Pemt	126.89	79.55	120.31	162.28	8.01	7.16	6.18	5.51	5.04	5.08	3.06	2.99	42.97	43.07	54.76	47.97	6.64	8.68	7.06	8.31	2.53	2.86	1.69	2.23	1.06	1.4	1.42	1.42
Cdh4	0.28	0.02	0.15	0.35	0.69	0.9	0.81	0.43	0.55	0.52	0.52	0.42	0.08	0.06	0.08	0.1	0.18	0.15	0.22	0.26	0.63	0.56	0.39	0.45	2.06	1.95	2.15	2.19
Ckmt1	1.91	1.37	1.33	1.43	7.94	9.56	8.95	5.42	4.56	3.51	3.63	3.86	0.65	0.88	0.26	0.9	0	0.03	0.13	0.04	10.95	9.15	12.14	9.3	1.47	0.74	0.77	0.51
Alox12	30.7	14.82	27.33	22.28	6.36	7.45	6.42	4.14	61.51	62.83	56.02	56.09	4.27	7.22	6.1	11.46	2.33	1.67	1.31	2.32	28.17	29.04	20.32	26.96	5.13	4.13	3.99	3.98
Rem1	22.63	7.02	22.76	14.54	9.55	7.74	7.46	4.48	11.63	10.54	13.89	11.39	106.94	98.44	99.01	79.19	1.18	0.83	0.98	0.68	10.06	10.71	10.65	10.75	4.98	5.33	5.97	6.1
Rnf17	0.09	0.07	0.32	0.55	0.15	0.19	0.36	0.16	0.23	0.15	0.98	0.09	0.2	0.46	0.21	0.32	51.89	51.5	58.78	53.57	0.29	0.28	0.22	0.4	0.18	0.11	0.11	0.2
Wap	0.07	0	0	0	0.36	0.28	0.8	0.12	0	0	0	0	0	0	0	0	0.12	0.11	0	0	0	0.13	0	0	0	0	0	0
Tmprss2	2.78	1.09	1.73	1.3	6.23	5.32	7.64	4.28	10.54	9.17	10.73	14.55	1.64	1.92	1.16	1.74	0.21	0.18	0.19	0.24	9.69	8.9	4.67	7.4	28.13	30.04	27.76	32.64
Gcg	0	0	0	0	0	0	0.05	0	0	0	0	0	0	0	0	0	0	0	0	0	0	0	0	0	1.1	0.37	0.4	0.14
Egfl6	5.38	2.76	6.93	6.55	2.57	3	2.97	2.23	14.84	14.01	18.55	18.37	2.61	3.23	3.99	3.88	0.12	0.19	0.16	0.15	5.58	5.13	4.2	4.93	3.39	3.16	2.32	2.75
Tssk3	1.34	0.6	1.63	0.85	1.86	2.24	2.08	1.55	1.18	0.93	5.1	0.81	0.71	0.94	0.52	0.59	112.87	123.49	122.95	108.54	4.53	3.8	2.15	3.98	0.74	0.1	0.15	1.17
Cttnbp2	2.61	1.15	4.3	2.8	0.45	0.75	0.41	0.35	1.75	2.3	2.01	1.67	23.2	22.45	21.78	16.31	1.23	1.4	1.57	1.42	0.6	0.66	0.76	0.72	1.6	1.61	1.62	1.51
Pparg	0.08	0.14	0.14	0.12	0.3	0.79	1.98	0.91	4.76	6.72	5.09	5.64	0.2	0.13	0.11	0	1	1.78	1.38	0.92	0.75	0.44	5.72	0.11	1.48	1.6	1.17	0.78
Pdgfb	9.11	2.27	6.11	4.81	2.01	1.43	1.86	0.97	19.02	18.6	17.8	19.32	6.62	5.4	6.44	7.06	0.69	0.67	0.95	0.75	2.78	2.35	3.84	1.56	3.81	3.25	4.25	2.78
Gpa33	1.16	0.45	0.6	0.69	0	0	0.02	0.02	0	0.03	0.05	0	0	0.25	0.05	0.65	0.07	0.04	0.13	0	0	0.05	0	0	0.05	0.13	0.05	0.09
Itga5	2.02	0.74	1.55	1.38	1.63	1.85	2.38	0.84	4.63	4.49	4.85	4.5	2.57	2.24	3.39	2.45	0.52	0.49	0.44	0.58	5.7	6.85	14.29	5.39	32.31	23.07	25.82	20.43
Gabra2	0.02	0.01	0.03	0.02	0.02	0.03	0.01	0	0	0	0	0	0	0	0.01	0.04	0	0	0	0	0.05	0.04	0.03	0.06	0.02	0.01	0.01	0.04
Adora3	0.15	0	0	0.05	0.05	0.05	0.16	0	1.59	1.12	1.67	0.6	0.09	0.1	0.1	0.05	3.98	4.47	3.93	4.81	0.22	0.07	0.27	0.05	0.21	0.28	0.18	0.13
Sox9	17.67	11.71	18.23	16.15	1.17	1.53	1.61	1.27	61.97	74.64	62.61	59.3	49.42	34.27	45.16	31.71	3.87	3.82	4.45	4.06	4.25	3.94	2.71	2.98	4.72	4.39	4.67	3.29
Haao	0.53	0.5	0.14	0.21	0.47	0.36	0.32	0.36	37.82	36.41	39.16	34.69	1.66	1.26	1.85	1.03	0	0.13	0.27	0.15	0.58	0.43	0.48	0.14	0.67	0.76	0.3	0.98
Btn1a1	0.02	0	0	0.02	0.56	0.47	0.4	0.37	0	0	0.02	0.02	0	0	0	0	0.14	0.13	0.03	0.07	0.05	0.03	0	0	0	0	0	0
Dnmt3l	0.16	0.08	0.32	0.14	0.07	0.03	0.15	0.21	0.04	0.07	0.49	0.14	0.04	0.13	0.17	0.1	3.29	3.91	5.17	2.95	0.49	0.23	0.29	0.15	0.17	0.11	0.07	0.21
Aire	0.42	0.33	0.35	0.41	0.2	0.15	0.13	0.13	6.68	7.47	4.14	6.13	0.09	0.27	0.21	0.23	0.37	0.33	0.4	0.36	0.3	0.43	0.41	0.32	0.08	0.02	0	0.08
Sult5a1	4.65	0.88	3.1	3.25	8.96	8.07	15.26	8.27	2.32	2.07	2.62	1.81	27.86	23.97	14.6	17.33	0.32	0.42	0.23	0.33	2.04	2.11	2.06	2.8	5.99	6.01	6.34	5.72
Oprm1	0.05	0.03	0.22	0.19	0	0	0	0	0	0	0	0	0.58	0.83	0.53	0.76	0.11	0.13	0.07	0.17	0	0	0	0	0	0	0	0
Tcf7	108.34	71.74	99.55	125.97	1.12	1.79	1.55	0.85	30.6	31.76	28.89	30.09	17.81	16.93	17.24	16.48	4.22	3.48	3.48	3.3	3.54	4.01	3.27	3.56	0.86	0.97	0.93	0.79
Car4	18.76	2.31	2.96	7.36	476.37	375.83	412.29	346.2	1.14	1.58	1.07	1.81	0.56	0.55	0.34	0.2	1.22	0.82	1.04	0.52	3.11	1.31	2.44	2.23	0.25	0.27	0.15	0.36
Txnrd3	4.1	1.78	3.62	2.85	2.43	2.6	2.4	1.52	3.91	3.96	7.35	4.18	17.15	16.24	18.46	11.17	150.08	153.44	154.43	153.34	3.79	3.72	3.38	3.54	4.01	4.96	4.14	4.42
Fasl	0.21	0.24	0.12	0.07	0	0.13	0.03	0.11	0.25	0.03	0.07	0.07	0.14	0.15	0.16	0.13	0.99	0.77	1.49	0.61	0.27	0.06	0.35	0.06	0.19	0.24	0.16	0.47
Bcl11a	0.15	0.05	0.17	0.1	0.86	0.76	0.71	0.65	1.28	1.45	1.64	1.09	0.12	0.37	0.25	0.13	4.2	3.69	4.06	4.29	0.52	0.61	1.16	0.58	1.72	1.46	1.69	1.57
Dbh	0.58	0.39	0.14	0.3	0.23	0.2	0.39	0.13	0.27	0.16	0.1	0.08	0.05	0.02	0	0.07	0.02	0	0	0	0.02	0	0.06	0	0.02	0	0.05	0
Hip1r	26.71	10.56	25.7	20.13	11.83	10.95	11.88	7.13	12.88	12.44	12.06	13.46	84.24	78.48	93.95	68.58	5.47	6.59	6.06	7.26	13.53	12.23	8.04	11.2	14.08	12.63	14.47	11.25
Hoxa10	0.49	0.57	1.09	0.43	2.43	1.61	1.81	0.9	1.12	0.7	0.67	1.07	0.82	1.92	2.33	2	0	0	0	0.05	18.72	19.27	18.6	17.56	21.08	23.84	25.86	25.94
Hoxa4	3.54	2.49	3.42	4.71	1.53	0.94	1.25	1.59	7.46	7.63	7.55	7.39	1.67	1.79	1.88	2.78	24.27	27.09	28.29	22.92	1.52	1.4	1.09	1.69	1.14	1.05	0.93	0.99
Ccl3	0	0.3	0.23	0.42	0.08	0.33	0.07	0.14	0.18	0.35	0.17	0	0.18	0.3	0.08	0.33	0.07	0.07	0	0	0.23	0.38	4.97	0.07	0	0	0	0
B9d1	7.8	3.34	9.13	7.35	7.3	5.96	6.66	5.46	30.96	26.52	29.26	28.83	7.63	7.64	9.33	8.17	81.29	85.29	97.89	78.05	8.37	7.17	6.77	7.74	5.71	6.15	6.48	5.15
C1ql4	0.88	0	0.6	0.15	0	0	0	0	3.05	3.56	2.71	2.46	8.16	8.83	6.63	6.37	0.44	0.41	0.06	0.14	0	0	0	0	0	0	0	0
Cfp	6.24	2.05	4.51	4.75	6.8	6.76	8.39	4.63	8.48	8.49	8.49	7.84	3.72	3.18	2.87	3.21	0.9	0.63	0.9	1.34	8.64	8.16	53.43	8.12	10.06	8.32	8	10.1
Ftcd	1.26	0.03	0.16	0.15	4.46	5.27	5.23	3.18	3.03	2.79	2.74	3.28	0.12	0.08	0.23	0	0.17	0.05	0.13	0.14	4.77	4.08	2.78	4.17	0	0.02	0.06	0
Oas1c	1.94	0.5	1.67	1.6	1.71	1.72	1.62	1.21	2.42	1.9	1.82	2.19	1.1	1.05	1.01	0.94	0.14	0.25	0.31	0.08	5.88	5.7	4.25	5.4	1.62	2.04	2.22	2.49
Ocrl	29.08	11.31	26.25	29.2	72.26	80.86	92.01	73.07	9.81	8.96	11.17	10.11	10.99	14.72	11.93	14.01	3.75	3.19	3.08	3.77	84.61	88.64	59.21	87.69	26.55	26.14	28.55	27.17
Slc26a3	5.83	2.25	6.89	6.69	6.43	7.72	7.87	6.46	54.62	49.08	53.83	51.27	3.4	4.87	4.92	4.69	0.02	0	0.05	0.02	22.58	23.5	21.03	24.86	0.96	1.37	1.04	1.28
Uhrf1	3.16	1.08	3.74	3.06	1.88	1.95	1.74	1.32	4.56	3.91	4.89	3.63	3.18	3.49	5.38	2.56	27.49	32.72	25.74	33.47	1.6	1.85	2.89	1.44	2.36	1.21	2.42	2.11
Hpn	10.69	3.81	7.55	6.21	3.25	4.87	3.63	1.96	59.37	58.12	56.44	57.84	3.98	4.3	5.21	6.35	0.06	0.14	0.03	0.1	4.73	5.35	3.78	4.49	1.62	0.82	1.07	1.17
Ckb	34.75	15.48	29.26	28.63	8.65	7.35	7.12	3.85	177.62	175.57	168.69	162.66	10.52	11.57	15.54	14.9	1.04	1.95	1.3	1.58	34.72	43.12	56.09	32.78	119.59	104.83	124.72	89.37
Itgb7	1.69	0.43	1.17	1.08	3.34	1.89	2.03	0.74	2.28	2.92	2.42	2.34	0.63	1.11	0.55	0.35	0.18	0.11	0.04	0.15	2.63	1.95	13.53	1.42	2.49	1.97	2.02	1.43
Cnn1	23.73	10.64	25.99	21.29	16.9	13.45	11.05	7.56	13.15	12.97	13.86	12.85	11.49	12.58	16.76	23.31	1.33	1.55	2.06	1.46	155.39	175.66	131.11	153.57	599.26	575.83	649.64	643.27
Ube2c	0.38	0.17	0.29	0.44	0.88	0.31	0.43	0.23	0.53	0.66	0.58	0.18	0.96	0.6	0.84	0.17	3.64	3.79	4.13	3.4	0.57	0.45	0.84	0.54	0.43	0.52	0.79	0.27
Slc19a1	7.78	2.26	5.37	4.71	2.49	2.51	2.46	1.16	30.25	30.67	31.31	28.88	9.19	8.26	8.76	7.73	0.46	0.72	0.61	0.83	1.71	1.84	2.16	2.03	3.31	3.38	4.12	3.12
Sost	0.46	0	0	0	0	0.15	0	0	0.13	0.45	0.25	0.16	0	0	0	0	0.79	1.09	1.13	0.77	6.98	11.42	3.05	9.54	100.26	93.91	118.88	92.46
Foxm1	1.06	0.31	0.92	0.83	0.79	0.79	0.56	0.37	1.21	1.36	3.03	1.53	0.99	0.97	1.29	1.02	37.37	33.56	35.16	34.03	1.03	0.97	1.1	0.87	0.99	0.73	0.75	0.79
Nrip2	3.97	1.31	2.56	3.64	0.2	0.08	0.14	0.07	0.38	0.79	0.27	0.26	0.51	0.39	0.62	0.48	0.3	0.25	0.23	0.24	0.2	0.2	0.23	0.09	0.39	0.25	0.3	0.16
Klhl10	4.12	2.69	4.32	6.23	10.77	11.05	10.05	8	1.39	1.08	5.65	1.42	1.42	1.56	0.48	2.04	189.95	207.29	215.17	183.3	21.49	16.09	12.32	19.25	2.43	0.66	0.71	3.13
Acap1	6.49	1.31	7.09	3.86	15.66	16.7	20.43	11.07	0.46	0.67	1.01	0.5	66.08	62.43	78.62	53.61	3.82	3.5	3.85	3.58	4	3.13	4.8	3.07	2.64	2.04	3.42	2.4
Tcea3	2.47	2.07	4.27	3.49	1.64	1.05	1.59	0.71	13.06	16.86	16.88	14.16	24.55	21.74	14.34	18.95	0.7	0.78	0.35	0.52	2.5	2.43	3.8	2.51	4.17	4.85	5.16	4.98
Hoxc11	0	0	0	0	0	0.06	0	0	0	0	0.03	0	0	0	0	0	0.05	0.03	0.08	0	0.12	0.09	0.03	0.17	1.34	1.19	1.69	1.49
Hoxc8	11.48	6.45	15.56	12.78	4.57	4.47	5.23	3.95	4.83	6.07	2.82	4.25	5.38	6.07	7.6	9.5	0.2	0.21	0.34	0.16	3.06	2.16	3.59	2.6	1.53	1.2	0.89	0.84
Gstt1	8.76	4.9	7.56	6.44	7.74	7.57	8.47	5.5	94.72	92.98	88.12	93.52	7.22	6.83	9.33	7.55	1.33	2.09	0.89	1.12	12.89	9.7	8.66	8.87	13.24	11.47	12.92	12.84
Cldn15	0.81	0.24	0.7	0.64	1.99	2.86	4.63	2.41	3.92	5.77	2.99	4.79	0.92	0.75	1.06	0.86	0.2	0.16	0.14	0.19	3.08	2.71	2.22	2.71	9.28	9.78	8.35	7.07
Tspan33	1.64	0.94	1.17	0.56	0.99	0.65	0.92	0.39	26.4	28.47	25.91	26.59	3.54	4.19	4.12	3.18	3.11	3.66	2.54	2.99	0.73	0.61	0.39	0.41	0.79	0.62	0.77	0.63
Rtcb	80.58	41.39	95.86	66.55	69.83	65.56	74.05	50.86	47.17	47.36	44.33	43.59	278.04	277.31	243.69	241.52	15.91	15.73	15.67	16.83	55.53	55.25	45.65	50.47	37.57	36.29	34.01	36.93
Hoxd13	0	0	0	0	0	0	0	0	0	0	0	0.03	0	0	0	0	0.02	0.02	0.04	0	0.02	0.12	0.09	0.18	5.23	6.61	5.87	5.41
Hoxd12	0.02	0	0	0	0	0	0	0	0	0	0.03	0	0	0	0	0	0	0	0	0	0	0.02	0	0.09	1.64	1.05	2.18	1.84
Clpb	12.28	4.91	8.63	10.07	11.95	11.22	11.06	8.16	9.6	9.45	12.42	8.43	7.83	8.79	8.22	8.87	116.14	121.26	118.81	117.42	17.33	14.54	11.88	15.96	10.67	9.66	9.99	11.05
Cpa3	0.04	0.11	0.04	0	0.98	0.34	0.84	0.72	1.18	1.19	0.93	0.85	0.14	0.16	0	0	0.3	0.53	0.49	0.29	1.43	1.7	2.41	1.51	7.24	6.67	7.32	7.88
Ltbp1	4.08	1.27	3.13	2.44	26.29	25.49	27.5	20.49	12.1	12.28	11.29	15.09	2.19	2.48	3.26	2.63	2.31	2.41	1.75	2.47	12.57	12.15	16.15	11.26	16.59	17.59	17.03	15.45
Kcnh6	0.02	0.02	0.03	0.1	0	0.04	0	0.03	2.37	2.43	1.88	2.46	0.12	0.2	0.07	0	0.47	0.47	0.37	0.35	0.02	0.02	0.02	0.07	0.02	0	0.04	0.02
Slc1a5	169.5	35.38	93.98	100.06	32.57	22.31	30.67	13.97	88.05	87.05	80.38	96.87	37.29	36.07	42.18	36.94	4.1	4.69	6.23	4.28	15.25	13.56	17.22	11.79	29.5	26.35	22.88	19.55
Spa17	3.5	12.02	4.69	4.75	9.69	13.52	15.24	15.89	14.05	17.57	17	18.11	6.13	4.93	2.68	3.38	278.64	236.45	209.31	168.04	8.91	9.47	4.64	9.13	2.32	1.28	1.28	2.98
Pnck	3.67	0.79	2.27	1.55	0.88	1.71	1.69	0.68	6.1	5.25	5.87	4.75	1.32	1.15	1.07	1.56	0.46	0.93	1.13	0.77	8.74	10.18	7.82	8.86	33.68	31.18	31.67	29.97
Tmem25	0.84	0.24	0.39	0.23	0.29	0.46	0.27	0.18	10.53	10.81	9.25	8.77	0.52	0.48	0.45	0.45	0.65	0.32	0.73	0.63	0.31	0.39	0.19	0.26	0.82	0.45	0.42	0.32
Spag5	0.38	0.18	0.49	0.43	0.56	0.43	0.48	0.47	1.21	0.63	2.07	0.82	0.76	1.16	1.05	0.47	40.64	37.65	36.02	43.5	0.91	0.57	0.87	0.55	0.6	0.43	0.53	0.41
Hsf2bp	1.18	0.56	1.34	1.28	0.18	0.35	0.31	0.17	0.72	0.37	0.8	0.45	0.15	0.2	0.17	0.07	16.71	16.31	17.78	18.78	0.27	0.65	0.37	0.37	0.15	0.02	0.13	0.18
Bbc3	1.37	0.25	1.18	0.74	0.85	0.59	0.79	0.18	12.29	10.39	10.83	8.04	2.66	2.68	3.3	2.27	1.35	1.41	1.62	1.6	0.78	0.39	1.52	0.56	1.77	1.21	1.81	1.12
Psmc3	36.09	22.48	44.1	40.56	37.5	34.26	36.86	25.9	37.1	40.05	41.61	35.22	51.23	51.08	54.52	51.19	206.97	236.47	190.21	243.62	34.42	33.55	34.25	28.21	42.01	39.86	44.48	37.85
Rapsn	0.11	0	0.11	0.32	0.12	0.19	0.41	0.17	0.72	0.49	0.56	0.45	0.09	0.32	0.76	0.35	2.28	1.79	2.44	2.02	0.18	0.18	0.92	0.17	0.43	0.08	0.04	0.23
Spi1	1.25	0.83	0.91	1.23	1.9	1.17	2.4	0.92	2.45	2.44	2.33	2.14	2.65	1.97	2.4	1.86	0.27	0.33	0.46	0.29	1.95	2.16	17.34	2.23	1.48	1.57	0.98	1.62
Napsa	2.93	1.42	2.98	3.5	13.06	19.01	12.67	8.71	60.61	58.36	55.81	64.95	4.84	4.62	5.36	3.49	0.1	0.26	0.03	0.19	30.55	34.58	38.24	33.33	1.29	1.88	1.91	2.45
Smg9	19.12	9.22	14.26	14.22	10.5	10.22	12.82	6.21	14.36	13.42	13.15	11.3	10.39	10.27	12.14	10.32	67.26	68.42	52.92	69.01	10.79	10.92	9.79	9.92	11.93	11.39	11.4	10.48
Ppm1j	5.04	0.93	1.92	2.68	0.49	0.54	0.74	0.67	1.83	1.65	3.64	1.29	0.94	1.26	0.6	1.21	47.56	54.02	63.34	53.69	0.86	0.75	1.2	1.14	0.8	0.54	1.01	0.83
Def6	4.25	1.47	4.28	3.32	1.64	1.7	1.63	1.14	1.89	2.15	1.88	1.89	13.67	13.7	17.72	11.66	0.24	0.45	0.65	0.31	2.16	2.86	3.55	3.03	2.79	2.99	2.53	1.78
Zim1	0.19	0.1	0.17	0.18	0.12	0.07	0.23	0.19	1.41	1.36	1.13	1.64	0.15	0.15	0.29	0.22	0.03	0.02	0.02	0.01	0.12	0.08	1.05	0.15	0.09	0.13	0.15	0.16
Dbf4	1.63	1.22	2.98	2.43	1.03	1.62	1.96	2.2	1.99	1.5	2.73	2.26	2.01	2.51	1.8	2.87	28.1	28.99	30.58	29.24	1.32	1.89	2.63	1.76	1.65	1.81	2.1	1.8
Cd320	13.68	3.14	8.51	10.57	10.45	5.63	8.27	4.43	6.78	6.38	6.4	5.95	5.26	5.25	6.8	5.49	35.07	36.38	36.66	41.96	7.95	8.33	5.53	6.7	6.42	5.04	6.8	5.13
Ipo4	5.65	1.98	4.1	4.04	3.08	3.69	4.02	2.14	7.15	6.55	7.65	6.86	2.73	2.79	3.54	4.16	27.69	26.42	24.59	25.32	5.01	4.61	4.32	4.72	5.96	4.93	5.29	4.88
Ncan	0.06	0.02	0.02	0.03	0.01	0.01	0.02	0.01	0.58	0.38	0.29	0.27	0.03	0.03	0.03	0.02	3.15	3.31	3.66	3.39	0.04	0.01	0.01	0.02	0.03	0.03	0.03	0.02
Slc25a42	12.42	3.07	7.22	6.72	3.45	3.76	4.57	1.95	82.84	81.45	90.37	90.61	9.87	8.23	11.03	7.68	2.33	1.9	2.1	2.44	4.3	3.62	2.96	3.69	10.16	10.56	11.69	9.05
Bmp8b	0.26	0.05	0.12	0.17	0.04	0.04	0.06	0.04	0.05	0.09	0.04	0.16	0.02	0.06	0.19	0.04	0.85	0.73	0.74	1.19	0.1	0.06	0	0.13	0	0	0.04	0
Dyrk1b	28.13	7.89	15.51	16.43	22.05	21.44	22.57	12.97	37.56	41.04	41.66	33.97	16.37	14.7	14.96	13.3	173.22	178.54	175.85	162.31	31.43	26.9	20.47	26.42	17.44	15.58	16.6	15.97
Scin	1.41	0.74	1.36	1.59	8.2	4.77	6.8	5.75	0.27	0.24	0.38	0.2	0.68	1.35	0.82	1.2	0.05	0.14	0.11	0.1	8.11	10.58	5.51	8.96	49.16	45.32	43.07	39.61
Ikzf4	1.28	0.5	1.28	0.77	0.76	1.19	0.94	0.59	12.47	11.76	10.71	13.4	1.75	2	1.54	2.21	0.6	0.29	0.48	0.61	0.92	0.98	0.7	0.79	1.32	1.23	1.1	1.12
Pon1	0	0	0	0	0	0	0.04	0	0	0	0.04	0	0	0	0	0	0	0	0	0	0	0	0.03	0	1.02	1.3	0.56	0.44
Tgfb1	18.25	8.24	24.29	17.78	15.69	14.3	16.57	7.23	9.03	11.38	9	8.17	51.47	46.46	63.66	51.06	3.5	3.28	3.94	4.07	7.03	5.55	27.73	5.23	8.1	8.17	8.56	8.81
Shh	6.05	3.4	6.75	7.71	17.43	9.1	14.66	12.09	0.67	0.35	0.63	0.64	1.01	1.04	1.2	1.73	0	0	0.02	0.04	9.43	8.78	5.65	9.27	2.36	2.25	2.57	1.53
Plekha3	101.39	44.94	143.77	120.23	94.59	100.03	97.23	76.09	15.94	14.01	17.19	17.88	289.98	358.7	315.24	267.9	16.13	16.74	16.31	16.07	55.27	55.8	43.51	56.75	35.16	30.56	33.35	31.2
Mea1	29.47	22.79	31.99	37.73	42.25	40.07	37.57	29.59	33.53	40.61	43.26	28.53	34.15	31.09	29.79	28.9	485.08	495.61	472.32	453.52	37.59	30.82	24.99	35.01	17.49	14.77	12.41	22.79
Gnmt	3.9	1.77	2.97	4.52	12.05	12.13	11.66	7.95	3.37	3.26	2.35	2.26	1.28	0.72	1.18	1.83	0.69	0.64	0.84	0.46	32.28	31.01	19.06	34.8	3.88	3.48	3.9	2.61
Grin2d	1.06	0.34	0.74	0.63	0.82	0.78	0.4	0.36	1.03	1.11	1.45	0.94	0.27	0.28	0.54	0.31	8.32	7.52	7.14	8.27	0.78	0.95	0.69	0.86	0.79	0.6	1.02	0.53
Epdr1	1.13	0.77	1.55	1.33	1.01	0.69	0.98	0.44	1.24	1.06	1.11	1.16	6.69	7.64	8.11	5.75	0.21	0.09	0.21	0.15	2.08	2.11	2.44	2.37	5.53	5.81	7.17	7.02
Plin4	14.21	5.21	9.66	7.35	5.47	8.74	11.99	4.25	50.65	55.64	38.81	64.96	1.9	2.63	2.54	6.06	0.21	0.38	0.19	0.34	10.58	9.72	5.5	9.64	50.22	54.55	51.98	42.41
Chaf1a	3.46	1.82	2.98	2.62	3.48	3.78	3.8	2.34	9.42	9.25	9.82	8.42	2.64	2.82	3.78	1.89	37.18	45.07	45.09	39.71	2.66	3.52	2.62	3.61	2.79	1.81	3	2.43
Pla1a	4.46	1.9	3.18	3.61	1.7	2.09	1.85	1.51	17.16	15.12	16.09	17.63	3.09	3.33	4.09	3.88	2.08	2.34	2.18	2.52	2.58	2.17	2.04	2.41	2.45	2.2	1.2	1.6
Adgre5	110.21	35.42	77.19	102.2	166.35	148.29	174.63	109.58	15.84	14.79	13.99	13.65	5.69	5.2	7.38	5.35	2.98	2.41	2.58	2.9	130.03	120.57	110.64	115.5	74.47	59.34	60.94	62.7
Lamb1	14.29	5.84	13.75	12.32	11.17	9.34	12.87	6.78	54.48	54.81	49.71	51.68	8.35	8.78	12.89	8.95	3.48	4.03	3.63	4.47	9.33	8.38	13.09	8.9	17.74	18	18	14.92
Cd36	0.87	0.79	2.46	1.17	2.84	5.2	11.35	4.32	32.87	30.95	29.74	50.29	1.42	1.63	1.89	1.3	6.1	7.4	7.21	6.68	6.23	4.84	98.89	3.2	11.05	12.77	7.56	5.37
Klf4	6.98	2.54	5.52	4.43	7.09	8.21	9.16	4.89	19.14	20.15	19.24	15.11	5.54	5.83	7.13	4.74	49.16	49.16	66.59	44.46	11.98	11.12	9.95	8.38	9.56	7.6	7.66	6.3
Ap1m1	18.32	5.6	13.95	12.65	16.51	16.09	15.73	9.81	39.79	36.29	36.38	37.15	13.43	13	15.81	14.17	126.38	128.1	120.27	127.48	19.63	19.53	21.62	16.85	24.92	21.7	24.51	21.26
Efna2	0.45	0.14	0.6	0.6	0.24	0.38	0.42	0.23	1.35	1.15	0.84	0.89	2.5	1.93	2.15	1.84	0.54	0.53	0.43	0.47	0.28	0.25	0.25	0.11	0.44	0.56	0.67	0.49
Lipe	4.56	1.34	3.83	3.32	5.32	7.23	11.23	3.45	23.81	30.82	22.35	29.81	4.96	5.2	4.09	4.36	111.3	96.84	93.68	103.41	9.22	8.41	6.61	7.79	8.69	10.69	8.37	7.12
Tbc1d8	75.74	31.11	70.3	57.81	31.13	29.42	37.18	22.52	5.38	6.54	6.84	5.05	115.04	121.48	112.58	105.92	5.01	5.74	5.13	6.28	20.79	20.09	16.42	17.95	14.8	14.42	17.25	13.97
Slc2a3	5.9	1.85	4.2	2.74	18.82	18.36	24.08	14.26	2.49	1.99	3.5	1.8	5.34	7.16	4.84	6.03	195.08	175.35	172.15	215.23	13.57	12.17	8.09	9.98	36.32	29.6	30.79	23.2
Edar	3.66	1.7	2.36	3.37	8.94	7.3	9.47	6.65	0.19	0.24	0.18	0.2	1.15	1.35	1.31	1.49	0.33	0.34	0.31	0.52	2.05	2.17	1.63	2.25	1.33	1.43	1.4	1.59
Sult2b1	8.15	2.3	5.94	7.39	29.21	23.19	25.93	14.36	0.33	0.39	0.55	0.25	6.59	7.07	6.64	4.97	2.08	1.57	1.44	1.53	22.31	23.3	12.47	21.29	6.62	6.07	6.71	6.34
Car11	2.62	0.48	1.03	1.05	0.85	0.43	0.59	0.38	0.56	1.13	1.49	0.78	1.02	1.87	0.89	1.76	0.38	0.61	0.27	0.56	1.79	2	2.2	1.63	4.79	4.76	5.4	5.4
Dlgap1	3.71	1.98	3.94	4.52	1.09	1.55	1.45	1.19	1.72	1.4	1.56	1.92	5.64	3.68	4.93	4.35	1.54	1.44	1.48	1.52	1.87	1.85	1.51	1.97	12.38	11.05	11.96	13.44
Hck	0.82	0.4	1.11	0.95	1.29	0.9	1.4	0.82	2.78	1.96	1.93	1.65	1.54	1.72	1.2	1.15	0.13	0.07	0	0.25	1.44	1.54	11.3	1.74	1.2	0.7	1.04	1.26
Atp8b3	3.47	1.63	2.17	3.14	9.63	12.44	14.52	8.26	3.24	1.87	17.69	2.17	2.01	4.24	1.48	2.05	538.24	498.58	486.1	544.07	29.28	30.44	18.21	30.18	0.65	0.27	0.28	1.19
Ccdc65	0.79	0.52	1.04	0.71	0.54	0.89	0.88	0.94	12.55	11.33	14.15	10.03	1.78	2.03	1.42	0.7	103.58	103.82	104.59	93.68	0.72	1.33	0.92	1.39	1	1.55	1.44	1.03
Fkbp11	28.1	11.69	25.09	22.29	7.56	4.02	5.68	3.25	5.05	3.26	2.1	3.74	21.73	20.25	35.06	32.95	0.37	0.28	0.3	0.4	5.34	5.37	6.8	5.82	4.04	3.83	3.14	3.39
Cd79a	0.12	0	0.16	0	0.35	0.73	0.53	0.23	0.19	0.23	0.4	0	0	0.08	0	0.04	0	0	0.04	0	0.24	0.04	0.15	0.12	0.13	0.32	0.21	0.21
Rab3b	1.14	0.23	0.84	1.29	3.67	4.58	3.91	2.37	0.23	0.14	0.12	0.12	0.04	0.05	0	0.08	1.05	1.28	1.46	1.71	0.21	0.21	0.05	0.32	0.32	0.18	0.04	0.2
St8sia6	18.41	12.85	30.18	25.95	0.23	0.22	0.15	0.17	0.17	0.2	0.3	0.23	59.81	63.86	64.65	51.74	0.07	0.12	0.12	0.09	0.31	0.27	0.24	0.24	2.57	2.62	3.31	2.77
Fcgrt	16.87	4.65	16.46	7.76	18.42	13.12	19.89	10.36	88.64	91.48	84.29	80.6	8.81	10.59	12.96	13.64	2.5	3.13	4.03	3.47	24.28	21.28	39.26	19.46	25.01	27.17	27.49	27.53
Phyhip	0.88	0.59	1.31	0.68	0.43	0.37	0.47	0.29	1.76	1.35	1.01	0.89	4.81	4.51	2.62	4.92	0.15	0.27	0.12	0.19	0.17	0.37	0.22	0.16	0.58	0.52	0.52	0.58
Cyp4f18	0.28	0.09	0.24	0.34	0.91	0.73	0.98	0.45	0.36	0.62	0.68	0.54	1.27	1.18	0.43	0.78	0.03	0.03	0.03	0.14	1.18	1.34	7.8	1.28	0.85	0.78	0.73	0.97
Ddr1	29.45	8.29	15.87	19.69	11.57	13.91	15.91	6.04	108.48	112.89	103.19	108.18	7.28	7.26	8.7	6.61	5.39	4.11	3.92	4.41	11.93	12.19	9.36	9.52	62.82	62.6	63.01	48.32
Ier3	5.83	0.81	7.75	4.31	2.56	2.76	2.1	1.95	20.85	17.6	18.27	18.6	28.15	24.1	33.94	26.33	0.43	0.32	0.96	0.31	5.18	3.78	5.05	3.02	22.93	19.93	17.17	12.35
Homer3	13.11	3.89	11.51	8.19	2.56	1.89	2.78	1.57	8.39	7.71	8.86	8.34	19.99	20.53	20.87	21.31	1.28	1.73	1.44	1.72	2.56	2.38	5.29	2.32	4.31	4.12	3.88	2.99
Sec14l2	16.81	7.51	13.04	12.39	9.58	8.62	7.89	5.16	4.44	4.12	4.77	4.5	5.13	5.52	5.98	7.09	0.89	1.21	2.01	1.28	33.78	31.05	15.58	31.45	56.01	44.59	51.32	46.38
Aven	1.24	0.48	1.2	1.07	1.45	1.23	1.29	0.87	1.26	1.47	2	0.98	1	1.32	1.48	0.97	22.77	23.84	25.66	20.94	1.64	1.42	1.65	1.44	1.76	1.55	1.82	1.76
Crot	14.52	4.79	14.88	14.43	27.85	26.08	37.33	28.19	14.47	13.22	15.48	15.63	20.97	24.32	22.1	19.35	4.17	4.36	5.34	5.03	17.82	16.46	18.75	17.3	191.47	188.45	191.09	158.69
Calb2	0	0.11	0.04	0	0.04	0.13	0	0.12	0.05	0	0	0	0	0	0	0	0.23	0.18	0.04	0.17	0.33	0.33	0.26	0.43	6.14	4.57	4.99	1.99
Man1a	357.91	175.62	376.29	453.21	5.71	5.03	6.52	5.01	26.48	26.59	27.27	26.89	232.94	300.92	313.01	257.57	0.39	0.52	0.55	0.62	8	7.17	14.43	7.59	10.5	11.06	10.36	11.36
Kif20a	0.63	0.19	1.03	0.95	0.92	0.61	0.88	0.5	1.02	1	1.94	0.91	0.82	1.65	1.66	0.82	36.66	34.78	33.81	38.95	1.13	0.56	1.47	0.88	1.18	1.05	1.3	1.05
Syce2	5.21	2.17	4.72	5.78	8.01	6.41	6.27	6.09	1.87	2.35	3.76	2.43	1.83	2.27	0.9	1.91	56.37	63.16	60.01	58.84	13.26	11.78	8.97	12.89	2.38	1.42	0.66	1.6
Nqo1	13.3	3.93	10.54	11.94	50.96	46.93	44.81	36.92	4.93	2.34	4.41	3.27	6.04	5.41	5.46	4.03	0.98	1.42	1.51	1.33	7.42	7.62	4.56	8.19	6.71	5.15	4.44	5.17
Tfam	3.7	1.67	4.05	3.88	4.95	4.3	4.89	3.67	3.59	4.3	4.91	4.53	4.79	5.11	5.1	4.78	22.8	19.22	16.16	18.66	4.48	4.6	4.68	4.46	6.15	6.13	5.57	6.04
Efnb3	0.67	0.1	0.27	0.04	0.12	0.18	0.26	0	3.26	2.31	2.79	2.41	0.29	0.16	0.38	0.28	0.51	0.56	0.56	0.61	0.37	0.18	0.35	0.23	0.47	0.69	0.39	0.45
Gstm5	69.12	22.68	60.08	65.4	168.07	174.08	159.86	143.36	588.59	502.61	584.5	568.36	35.59	45.27	39.28	34.44	1239.85	1288.86	1365.27	1280.72	331.27	277.76	188.25	308.09	34.38	20.14	17.19	42.92
Gstm7	507.26	152.39	430.44	504.81	1148.08	1013.94	1154.65	709.05	406.92	378.26	389.6	393.01	128.85	143	132.52	157.48	29.2	31.99	32.51	32.5	556.76	443.16	379.91	485.52	24.53	17.2	15.77	15.6
Gstm3	0.54	0.47	0.22	0.29	1.91	2.76	1.56	1.47	2.24	0.91	0.78	0.75	0.05	0	0.05	0.05	0.42	0.51	0	0.14	0.54	0.54	0.24	0.64	0.57	0.25	0.52	0.4
Stat5a	15.85	6.48	11.69	12.71	30.36	30.07	33.11	19.03	4.72	4.38	4.72	8.31	4.53	4.22	3.96	5.51	1.17	1.14	1.47	1.27	55.16	58.23	33.23	53.35	14.94	11.39	11.41	9.83
Hmox2	21.79	12.08	27.41	23.66	17.58	18.41	17.89	12.61	27.03	26.45	30.91	24.73	45.29	53.9	49.78	53.1	288.07	320.67	305.54	279.08	20.95	21.33	39.59	19.46	22.58	19.62	19.19	23.48
Map3k20	5.67	3.06	5.7	5.26	3.66	4.79	4.69	3.5	6.9	5.87	7.47	6.79	4.57	5.86	6.1	5.52	2.86	3.04	3.23	3.33	7.44	7.23	8.4	6.2	31.75	34.52	31.88	32.75
Col5a3	0.95	0.41	1.06	0.91	1.09	0.99	1.87	0.53	19.5	19.89	19.27	17.75	1.33	1.08	1.71	0.97	0.17	0.19	0.27	0.17	1.65	1.19	5.24	0.89	4.92	5.23	5.51	2.85
Angptl2	5.95	2.55	5.84	5.16	4.32	4.26	5.52	2.67	30.98	32.03	32.37	30.87	3.64	3.81	4.58	4.03	0.52	0.55	0.55	0.5	3.89	3.41	8.01	3.29	5.17	5.83	5.18	5.49
Cacna1b	0.42	0.05	0.02	0.03	9.74	10.31	11.89	7.44	0.06	0.01	0.04	0.03	0.01	0.01	0	0.01	0.66	0.55	0.5	0.7	1.43	1.27	1.05	1.25	0.03	0.01	0.03	0.03
Trmt10a	1.13	0.99	1.27	1.52	0.69	0.73	1.07	0.7	1.11	0.95	1.38	1.36	0.85	1.06	1.15	0.67	16.58	15.61	15.23	17.01	1.5	1.44	1.22	1.2	1.5	1.32	1.36	1.52
Etv1	2.89	1.5	4.99	2.5	0.74	0.7	0.85	0.78	3.25	2.57	4.26	3.54	13.31	14.49	12.49	12.12	0.89	1.04	1.31	1.45	1.8	1.81	1.65	2.14	4.13	4.44	4.72	4.52
Clcn5	38.12	14.48	38.01	35.68	55.31	57.16	62.41	49.26	5.79	5.21	5.92	6.11	11.82	20.46	16.1	27.91	2.05	1.91	2.07	1.97	82.17	75.93	72.36	80.3	6.95	4.12	5.38	7.2
Pde1c	0.75	0.31	0.68	0.69	2.41	2.58	2.42	2.1	0.29	0.23	0.85	0.14	0.33	0.6	0.31	0.43	33.06	29.92	30.44	34.75	1.17	1.14	0.9	1.12	6.37	6.65	8.47	8.52
9330159F19Rik	1.21	0.74	1.8	1.51	0.63	1.17	0.99	0.79	1.19	0.91	1.27	0.99	7.11	8.05	7.39	5.86	0.12	0.12	0.07	0.21	1.08	1.1	1.02	1.09	2.34	2.58	1.96	2.19
Il11	0.18	0	0.21	0.2	0.43	0.7	0.45	0.23	0.35	0.68	1.05	0.63	0.22	0.12	0.09	0	2.77	3.36	3.72	2.85	0.36	0.48	0.27	0.29	0.23	0.14	0.06	0.39
Bid	3.42	1.61	3.46	2.84	1.6	1.42	1.22	1.1	11.61	10.68	11.87	11.62	1.88	2.18	2.1	2.38	1.97	1.72	2.32	1.96	2.01	1.72	4.27	1.35	1.82	1.3	1.31	1.62
Psg17	0	0	0	0	0.03	0	0.11	0.05	0.1	0.03	0.15	0.06	0.07	0.03	0.06	0.03	1.77	1.2	1.3	1.21	0.08	0	0.08	0.19	0.09	0	0	0.04
Ndrg2	71.58	38.63	66.98	77.46	7.06	6.27	7.29	4.62	35.6	37.63	39.61	38.05	8.42	9.65	8.53	15.21	6.49	7.04	7.98	8.86	9.39	8.44	8.32	7.62	25.17	30.1	27.35	31.31
Chn2	0.9	0.49	0.8	0.47	0.52	1	1.28	0.81	1.93	2.37	2.55	1.88	1.22	1.57	1.02	0.7	91.77	82.68	75.39	77.79	1.65	2.12	1.56	1.78	8.38	7.42	8.15	6.22
Ghrhr	0.05	0.03	0.02	0.05	0.63	1.14	0.56	0.52	12.31	11.99	12.67	9.88	0.27	0.71	0.83	0.25	0	0.02	0	0	0.02	0	0.02	0.02	0	0	0	0.06
Aqp1	8.16	3.02	4.75	6.03	10.13	8.34	7.8	2.65	283.8	261.24	268.26	241.47	27.88	29.84	29.23	24.57	0.1	0.16	0.06	0.27	14.76	15.9	16.83	13.67	53.71	46.72	47.71	47.45
Arid3b	2.95	0.82	1.71	1.81	2.33	2.02	2.43	1.55	1.9	1.76	2.27	1.42	2.28	2.29	3.03	1.92	16.25	14.28	16.15	15.96	2.18	1.46	2.57	1.77	5.9	4.67	4.27	4
Pgf	30.08	16.39	23.47	27.94	11.16	11.8	12.83	9.43	20.61	16.56	19.32	18.31	3.3	4.18	3.7	4.65	0.94	1.65	0.86	1.45	0.94	0.68	1.04	1.02	3.98	3.59	3.61	3.36
Crabp2	0.7	0.57	0.69	1.31	6.63	10.93	11.24	5.93	0.15	0.21	0.27	0.14	0.45	0.25	0.33	0.14	0.41	0.28	0.12	0.38	37.34	38.94	23.69	32.55	1.69	0.64	1.2	2.1
Hapln2	0.1	0	0.02	0.03	0	0.03	0.02	0	0	0	0.19	0.06	0	0.02	0.05	0	1.56	2.02	2.07	1.39	0.03	0	0.05	0.05	0.05	0	0	0
Thop1	9.94	2.77	7.52	5.91	5.02	4.74	5.61	4.17	9.56	9.2	11.29	8.62	7.73	7	6.72	7.55	83.06	92.02	82.45	91.49	7.58	7.63	5.47	5.78	5.45	4.69	4.97	4.75
Rasa4	2.29	0.79	2	1.7	3.16	2.58	3.55	1.78	18.8	20.28	19.66	15.53	1.89	2.41	2.38	2.15	0.65	0.39	0.52	0.4	4.56	4.12	16.3	3.14	3.34	3.65	3.82	3.44
Fxyd4	0.5	0	0.05	0.32	2.63	1.93	2.22	0.92	1.6	1.76	2.29	1.25	0.41	0.43	0.92	0.53	0	0	0	0	11.14	10.16	4.9	6.77	99.71	97.46	98.13	86.36
Chd5	0.44	0.32	0.3	0.17	0.18	0.2	0.34	0.17	0.61	0.74	1.68	0.66	0.25	0.43	0.15	0.29	42.59	51.53	50.93	44.95	0.44	0.52	0.28	0.53	0.58	0.52	0.39	0.4
Slc1a2	0.04	0.02	0.01	0.02	0.16	0.08	0.17	0.1	0.64	0.49	0.7	0.89	0.07	0.07	0.06	0.07	3.52	3.09	3.38	4.07	0.06	0.07	0.04	0.06	0.05	0.09	0.05	0.06
Ndrg1	27.58	15.56	30.39	21.91	13.18	12	11.53	8.48	171.09	166.55	173.91	174.63	28.7	29.99	29.48	35.66	3.44	3.62	4.4	3.81	17.33	15.22	25.72	13.6	13.65	13.52	10.39	12.46
4930550C14Rik	0.26	0.36	0.55	0.54	0.28	0.27	0.47	0.24	0.93	0.73	1.62	0.79	0.38	0.36	0.31	0.35	17.53	16.84	18.44	14.48	0.35	0.39	0.46	0.29	0.39	0.32	0.34	0.22
Man2b1	72.64	17.62	38.86	35.22	156.24	177.44	193.65	105.09	49.33	47.85	44.37	46.31	40.33	39.33	46.16	41.95	8.58	9.29	9.29	10.73	46.59	45.28	111.28	41.36	69.57	65.84	75.33	55.24
Spc25	0.76	0.33	0.62	0.62	0.58	0.8	0.92	0.92	0.48	0.64	0.92	0.42	0.45	0.89	0.91	0.71	10.63	10.44	10.08	9.87	0.7	1	1.22	0.99	8.37	10.42	8.3	7.19
Dnah2	0.57	0.34	0.42	0.33	0.35	0.47	0.6	0.21	19.08	16.96	18.95	17.31	0.91	0.95	1.18	0.47	34.91	29.53	27.02	37.93	0.46	0.5	0.38	0.53	0.16	0.17	0.12	0.19
Fgfr4	0.43	0.05	0.24	0.17	0.04	0.15	0.22	0	63.24	63.63	60.74	60.84	1.96	2.2	2.97	1.07	1.07	0.69	0.79	0.94	0.12	0.12	0.08	0.13	0.77	1	1.51	0.86
Fcer1a	0	0	0	0	0.19	0	0.06	0	0.21	0.2	0.06	0.07	0	0.17	0	0	0	0	0	0	0.41	0.53	0.32	0.22	2.08	1.47	1.49	1.96
Asf1b	0.9	0.09	1.2	0.47	1.33	0.91	0.74	0.53	0.61	0.92	1.11	0.58	0.78	0.67	0.68	0.85	18.52	17.76	18.85	16.4	0.76	0.98	1.86	0.97	0.77	0.67	0.62	0.59
Dnajb1	17.97	5.93	14.76	12.68	28.39	22.93	26.3	16.9	25.76	23.75	24.49	22.63	14.24	15.3	14.56	12.98	95.88	97.62	93.28	96.49	12.65	13.55	10.96	12.25	10.1	9.97	9.65	9.35
Msh4	0.46	0.11	0.24	0.12	0.17	0.24	0.15	0.28	0.47	0.26	0.62	0.49	0.4	0.48	0.29	0.3	8.09	10.12	10.84	8.98	0.25	0.55	0.4	0.27	0.89	0.72	0.99	1.11
Evx1	0.08	0.19	0.16	0.54	0.02	0	0	0	0	0	0	0	0.1	0.08	0.06	0.29	0.06	0	0.02	0	0	0	0	0	0	0	0	0
Igf1r	30.82	9.11	26.63	21.69	22.99	21.75	27.54	17.09	57.11	53.83	52.81	54.56	125.76	108.46	138.69	83.8	3.84	3.3	3.92	4.21	24.99	23.59	14.92	21.65	23.09	22.36	21.95	19.72
Cyp2a5	0	0	0	0	0	0	0	0	0.44	0.16	0.35	0.55	0	0.03	0	0	0.03	0	0.03	0.03	0	0	0	0	0	0	0	0
Atp4a	38.32	13.44	27.66	29.71	3.06	3.39	3.78	2.88	0.43	0.17	0.28	0.21	0.32	0.72	0.47	2.32	0.27	0.46	0.53	0.42	2.27	1.82	1.99	1.83	1.1	0.71	0.66	0.41
Mrvi1	5	1.74	5.23	4.21	3.36	3.38	3.14	1.94	5.22	5.66	6.1	5.36	4.03	4.39	4.89	4.39	0.77	0.53	0.47	0.64	13	16.09	9.33	12.55	51.95	50.79	50.92	46.81
Tmod4	0.66	0.06	0.46	0.31	0.15	0.5	0.53	0.18	0.65	0.84	1.27	0.57	0.17	0.23	0.29	0.05	2.3	2.24	1.9	1.83	0.7	0.56	0.55	0.44	0.3	0.58	0.49	0.72
Mthfd2	54.32	20.89	42.81	46.16	100.56	78.65	95.65	59.84	13.9	12.08	13.72	9.78	6.34	7.84	8.08	13.01	10.34	10.44	11.18	11	66.78	60.82	38.73	53.52	9.43	8.22	10.15	8.57
Nr1i3	0.06	0.03	0.12	0.11	0	0	0	0	0.11	0.16	0.09	0.2	0.02	0.06	0	0.02	0	0	0.02	0	0	0	0.04	0	0	0.02	0	0
Sh2d1a	0	0	0	0	0.02	0	0.02	0	0.02	0	0	0	0	0	0	0	0.04	0.11	0.14	0.11	0	0.02	0.04	0.02	0.02	0	0.02	0.05
Pard6a	4.2	1.92	3.56	4.94	4.55	3.29	5.18	2.6	5.42	5.71	5.73	4.55	2.97	4.44	3.93	3.97	20.66	23.22	23.1	21.32	4.23	3.59	3.61	2.6	3.9	3.2	3.51	3.48
Agrp	0	0.1	0.24	0.35	0	0	0.08	0.08	0.47	0.45	1.05	0.8	0.1	0	0.5	0.17	0.07	0.14	0	0	0	0.08	0	0	0.09	0	0	0.1
Pvalb	0.24	0.39	0.12	0.39	0	0	0	0	0.14	0.07	0	0.07	0	0	0	0	0.11	0.05	0.17	0.12	2.54	1.44	0	0	0	0	0	0
Cd247	0.16	0.05	0.41	0.43	0.28	0.23	0.21	0.13	0.32	0.04	0.58	0.13	0.02	0.15	0.06	0.15	2.8	1.94	3.74	2.7	0.16	0.36	0.38	0.21	0.32	0.29	0.1	0.25
Mmp8	0	0	0.02	0.05	0.32	0.31	0.27	0.36	0	0.03	0	0	0	0.02	0	0	0	0	0	0.05	0.02	0.02	1.48	0.02	0	0	0	0
Sqor	16.57	8.45	16.43	13.45	8.91	9.12	9.34	8.51	15.46	15.22	16.6	14.99	27.74	30.8	27.33	26.4	110.47	113.17	114.59	104.68	11.08	12.72	10.42	11.97	6.2	6.96	5	7.11
Cnga2	3.74	1.72	5.04	3.77	1.36	1.92	1.59	1.12	0.11	0.13	0.15	0.11	5.78	8.08	6.04	7.51	0.05	0.03	0.07	0.02	0.29	0.29	0.35	0.59	0.14	0.02	0.04	0.12
Spo11	0.57	0.3	0.69	0.71	0	0.12	0.08	0.09	0.45	0.4	0.85	0.5	8	6.55	7.05	4.93	16.49	17.51	18.82	18.85	0.08	0.16	0.09	0.11	0.05	0.15	0.02	0.04
Trh	0	0	0	0	0	0.05	0.08	0	0.1	0.1	0.05	0.05	0	0.04	0	0	1.18	1.15	1.53	1.24	0.04	0	0	0.04	0.14	0	0	0
Trpv1	0.04	0.02	0.02	0.08	0.02	0.02	0.08	0.02	0.06	0.18	0.13	0.02	0.04	0.03	0.07	0.02	1.87	1.62	1.59	1.58	0.18	0.03	0	0	0.54	0.97	0.78	0.98
Dnase1	0.13	0.08	0.17	0.28	0.07	0.04	0.04	0.02	0.27	0.52	0.44	0.84	0.05	0.02	0.07	0.09	0.02	0.02	0.02	0.09	0.04	0.02	0.04	0	0	0	0	0
1700037C18Rik	2.95	1.68	2.51	2.99	1.91	1.66	1.77	1.13	5.01	5.33	6.19	5.18	1.73	1.94	2.47	1.61	26.65	25.51	30.95	26.14	3.17	2.1	1.84	2.27	1.87	1.06	1.29	1.36
Calcoco2	0.04	0	0	0	0.04	0.04	0	0	2.36	3.22	2.88	2.25	0	0.18	0.45	0	0.03	0.09	0.17	0.15	0	0	0	0	0.04	0.16	0	0
Prss16	0.02	0	0.04	0.02	0.06	0	0	0.02	0	0	0	0	0	0	0.02	0	0.05	0.03	0.07	0.09	0	0.02	0	0	0	0.02	0.02	0.05
5430419D17Rik	1.53	0.59	0.69	1.42	2.89	2.88	2.86	1.67	0.02	0.03	0.02	0.01	0.51	0.89	0.38	0.64	0.29	0.14	0.22	0.3	0.22	0.15	0.21	0.16	0.02	0	0.01	0
Htra1	17.1	6.99	18.11	12.79	33.11	33.87	34.4	21.05	175.15	164.98	165.09	168.32	16.76	18.48	23.38	17.62	4.49	4.92	5.79	4.75	12.89	11.68	24.02	11.14	17.47	14.71	17.15	15.49
Clcnkb	7.1	2.42	4.48	4.33	11.93	9.66	11.32	7.81	1.7	1.51	1.59	1.33	2.81	2.66	3.38	4.11	0.37	0.1	0.13	0.12	9.47	8.75	6.48	8.66	1.21	0.7	0.97	0.84
Fam131c	0	0	0.24	0.22	0.13	0.22	0.04	0.08	14.26	17.3	15.27	17.49	0.39	0.8	1.15	0.53	1.41	2	1.75	1.69	0.12	0.29	0.04	0.2	0.22	0.05	0.26	0.31
Ccdc159	6.98	2.04	3.18	3.39	3.74	4.04	4.3	2.81	5.94	5.1	5.01	5.7	0.64	0.52	0.88	1.16	39.17	38.34	35.85	37.76	8.57	6.92	5.67	7.39	8.08	7.32	7.5	7.01
Tep1	8.49	2.04	5.72	4.95	5.8	6.15	7.74	3.8	6.51	6.74	6.94	7.05	3.99	3.73	4.38	3.75	4.26	3.95	3.9	4.54	23.79	24.09	18.5	23.37	40.47	36.99	38.28	34.72
Zbtb32	0.7	0.26	0.59	0.54	0.29	1.23	0.87	0.44	0.81	0.37	1.48	0.62	0.51	0.74	0.31	0.28	59.48	55.46	57	65.21	0.73	0.53	0.36	0.6	0.32	0.45	0.24	0.55
Upk1a	32.96	12.61	23.94	21.54	11.76	17.58	14.84	8.55	0.53	1.4	0.86	0.55	0.54	1.25	0.3	3.83	0.15	0.14	0.23	0.12	16.52	11.29	10.27	17.39	6.19	6.38	5.63	7.03
Ggt5	1.05	0.16	0.97	0.65	1.4	1.26	1.49	0.93	5.13	5.7	6.11	5.55	1.21	0.86	1.23	1.23	0.52	0.46	0.58	0.51	0.83	0.92	1.62	0.9	1.92	2.39	1.79	1.75
Ggt1	181.62	92.93	165.61	197.71	1.69	1.47	1.33	0.69	184.88	183.98	170.75	167.16	15.53	15.37	16.81	25.94	0.63	0.57	0.68	0.65	22.32	21.22	7.1	17.79	6.03	3.85	6.99	4.23
Crip1	394.56	122.12	388.61	343.87	42.22	33.14	27.94	18.5	120.44	122.22	103.62	94.05	391.93	365.11	405.07	413.22	0.9	1.05	1.14	0.78	114.39	102.89	71.45	90.43	191.08	162.34	152.27	170.55
Cbfa2t3	0.96	0.47	0.81	0.62	0.75	0.97	1.15	0.3	5.22	5.78	5.56	5.87	1.21	1.23	1.36	0.86	0.16	0.18	0.3	0.26	1.25	0.97	1.36	0.72	1.69	1.68	1.19	1.15
Mpl	0	0	0	0	0	0	0	0	0.09	0.16	0.15	0.04	0	0.02	0.04	0	0	0	0	0	0	0	0	0.02	0.02	0	0.08	0
Cdc20	1.49	0.6	1.59	1	1.83	1.11	1.2	0.71	3.62	3.13	3.96	2.69	1.79	1.94	3.54	1.45	70.66	78.9	72.62	79.72	2.21	1.96	1.92	2.03	2.1	1.86	2.32	2.43
Adamts4	0.5	0.21	0.45	0.41	0.31	0.18	0.2	0.14	1.74	2.09	2.01	2.97	0.54	0.57	0.64	0.53	0.15	0.11	0.15	0.24	0.53	0.35	1.12	0.27	0.41	0.36	0.23	0.29
Srm	23.2	11.29	19.87	19.23	64.73	48.73	56.4	29.43	10.37	8.89	7.89	10.17	15.11	15.12	18.29	16.21	4.36	4.25	4.88	4.37	28.85	23.68	17.07	22.02	15.49	12.11	12.89	12.07
Nsmf	92.58	29.28	68.13	63.66	6.68	4.96	7.26	3.59	35.88	35.82	36.69	31.69	100.2	87.96	112.89	85.33	13.05	11.61	12.17	13.47	8.88	8.5	8.82	8.32	13.8	12.81	14.4	11.66
Cyba	11.09	5.02	12.79	9.49	20.13	14.52	16.6	7.79	59.27	68.96	62.77	54.44	9.4	9.37	8.37	9.43	1.83	1.65	1.24	1.83	21.62	17.48	143.23	15.74	16.71	19.01	15.68	15.04
Itih1	0	0	0.02	0	0	0	0	0	0.11	0.02	0.06	0.17	0	0.02	0	0	0	0.02	0	0	0	0	0	0	0	0.02	0.04	0
Ihh	2.31	0.43	0.92	0.6	6.8	4.71	6.86	3.96	55.21	56.44	51.22	49.07	1.73	2.25	2.55	1.84	0.09	0.21	0.13	0.07	7.09	5.86	3.39	5.49	0.23	0.14	0.2	0.33
Atp7b	0.11	0.01	0.06	0.07	0.03	0.04	0.06	0.01	2.47	2.57	2.4	2.86	0.05	0.23	0.09	0.02	3.03	2.83	2.39	3.4	0.13	0.15	0.02	0.07	0.09	0.04	0.01	0.05
Defb2	52.55	25.76	41.68	51.32	194.78	217.23	173.9	116.08	0	0.43	0.63	0	0.69	1.5	0.8	7.67	0	0	0	0	578.63	619.11	344.19	509.15	24.09	18.15	18.11	14.03
Rundc3a	0.7	0.11	0.65	0.53	1.29	1.07	1.16	0.86	1.44	1.74	1.56	0.95	0.51	0.31	0.33	0.4	14.77	16.02	18.55	15.08	2.34	2.06	1.4	2.57	0.4	0.95	0.27	0.37
Slc4a3	4.77	1.16	3.05	2.23	1.89	1.98	2.34	1	7.65	7.23	7.3	6.13	2.92	2.52	3.72	2.68	2.19	2.04	2.28	2.92	5.06	5.79	4.33	4.71	20.48	17.71	20.78	12.75
Cdt1	0.79	0.14	0.56	0.36	0.62	0.51	0.45	0.18	6.52	5.32	4.98	5.6	1.53	1.53	1.99	1.24	1.15	0.95	1.11	1.05	0.61	0.76	2.67	0.66	1.42	1.29	1.24	1.45
Aprt	3.45	1.48	4.25	3.87	4.84	5.38	6.73	3.03	32.09	29.82	30.09	31.19	6.18	5.6	8.01	5.38	84.98	90.97	89.92	87.05	8.91	8.01	23.06	7.48	13.79	12.06	12.69	12.12
Nphs1	0.06	0.05	0.05	0.07	0	0	0	0	0.03	0	0.07	0	0	0	0	0.03	0.06	0.03	0.02	0.01	0.01	0	0.01	0	0	0	0	0
Gmnn	1.16	0.47	1.29	1.08	1.65	1.44	2.41	1.67	3.76	3.99	5	4.04	1.68	3.24	2.17	1.07	12.39	11.5	10.68	13.64	2.47	2.39	2.67	2.04	1.45	0.47	1.1	1.27
Zfp184	1.39	0.95	1.07	1.32	0.82	0.96	0.9	0.71	1.82	2.03	2.18	2.1	0.72	0.98	0.82	0.87	6.09	6.2	7.05	7.17	1.26	1.04	0.68	1.23	0.96	0.65	0.64	0.85
B4galnt1	58.32	22.45	54.41	45.22	8.67	11.34	9.71	5.97	2.68	2.21	2.11	2.2	127.89	112.97	135.39	110.71	11.94	13.17	13.85	13.38	17.92	17.36	21.77	15.23	5.61	5.74	5.49	6.55
Tph2	0.05	0	0	0.02	0.12	0.02	0.02	0.02	0.03	0.03	0.02	0.02	0	0.07	0	0.05	0.89	0.51	0.97	0.74	0.27	0.02	0.12	0.23	0.1	0.05	0	0.03
Krt23	6.11	3.46	12.61	7.54	0.12	0	0	0	0	0	0.08	0.04	128.08	125.64	155.32	110.44	0.28	0.46	0.35	0.6	0.04	0.04	0.07	0.04	1.77	2.22	1.31	0.96
Ttc25	2.45	1.18	1.5	1.7	3.78	3.45	4.57	3.39	12.78	13.5	13.84	12.51	1.52	1.44	1.53	0.98	30.62	36.15	32.36	35.35	2.3	2.23	1.49	2.75	3.46	3.5	3.37	2.84
Sulf2	13.95	4.31	10.95	10.38	66.05	71.24	76.36	43.4	31.29	33.62	27.52	28.53	4.19	4.33	5.88	4.02	5.46	6.24	5.5	5.99	33.51	30.78	34.7	30.13	12.9	13.53	12.83	11.66
Eif1b	12.45	6.19	14.24	15.62	13.54	12.31	12.41	6.51	21.73	24.08	19.59	22.15	18.99	20.59	18.28	17.96	108.28	108.18	114.01	111.67	16.97	15.73	14.1	16.13	20.14	19.14	21.4	21.55
Chrd	1.5	0.35	1.2	0.87	10.84	10.02	11.27	6.34	19.55	17.84	17.28	14.01	0.97	1.15	1.37	0.95	0.46	0.28	0.32	0.39	2.43	2.27	2.7	2.53	2.44	1.94	1.82	1.76
Hspa1l	1.66	0.8	0.99	1.79	1.12	1.06	1.61	0.85	0.75	0.88	2.33	0.97	1.75	2.94	0.94	1	252.15	237.1	207.86	248.93	2.03	1.54	1.37	2.11	0.38	0.24	0.15	0.79
Neu1	38.99	15.47	32.43	32.32	83.25	67.68	72.03	46.91	25.71	25.87	23.63	25.75	14.69	17.48	17.25	25.87	1.15	0.93	0.99	1.13	48.46	48.97	32.44	40.93	10.69	9.09	10.8	9.4
Lsm2	3.67	2.21	3.77	3.07	5.23	5.75	4.71	3.62	5.09	4.04	5.49	6.04	4.15	4.25	4.19	4.42	41.01	47.21	48.58	40.78	3.88	3.58	3.4	3.67	3.84	3.83	3.64	3.79
Pole	3.01	1.11	2.59	2.61	1.5	1.37	1.78	1.06	2.33	1.96	2.63	2.1	1	0.92	1.18	0.56	11.44	10.68	11.43	11.52	1.24	1.34	1.35	0.99	1.43	1.07	1	1.13
Atp1a4	1.13	0.31	0.67	1.13	0.76	1.46	2.22	1.11	0.93	0.61	3.67	0.68	0.77	1.61	0.37	0.73	207.48	193.75	187.04	201.8	3.02	2.57	2.33	3.08	7.98	8.59	7.24	11.06
Casq1	0.61	0.41	1.45	1.08	0.31	0.17	0.42	0.24	0.37	0.61	1	0.25	0.76	1.02	0.76	0.79	4.93	5.38	7.22	6.11	2.4	2.51	1	0.61	44.64	44.35	40.65	31.83
Ceacam9	0.17	0.11	0.17	0.32	0	0	0	0	0	0	0	0	0	0	0	0	0	0.04	0	0	0	0	0	0	0	0	0	0
Scube2	0.4	0.09	0.13	0.27	0.22	0.26	0.25	0.09	1.67	1.61	2.38	1.59	0.24	0.5	0.15	0.23	6.85	6.76	6.86	6.11	0.65	0.61	0.8	0.74	3.43	3.18	4.01	2.92
Tssk4	6.09	1.18	3.86	2.66	2.52	2.15	2.73	2.03	5.51	4.51	5.31	5.52	6.14	5.86	5.36	5.7	48.54	64.74	68.96	50.42	2.28	1.81	2.13	1.86	2.68	2.33	3.39	2.49
Rad51c	0.66	0.25	0.47	0.68	0.51	0.32	0.39	0.27	0.64	0.64	0.83	0.73	0.23	0.36	0.2	0.22	6.53	6.87	6.65	8.2	0.28	0.49	0.56	0.38	0.73	0.98	0.52	0.44
Cav1	11.31	4.28	15.89	13.74	10.44	15.65	23.19	11.52	143.8	131.77	141.44	160.08	15.34	17	22.18	18.3	2.9	3.08	4.34	3.53	52.47	55.16	51.86	54.57	191.25	198.66	193.14	227.09
Cpt1c	3.64	1.52	3.9	2.7	2.66	2.2	3.4	1.78	10.19	9.16	10.69	8.47	2.68	2.79	3.5	2.85	26.32	25.49	27.92	28.39	4.26	4.06	4.35	4.24	7.32	6.83	7.65	6.08
Id3	2.18	0.12	1.54	1.56	4.88	7.72	7.32	2.81	7.65	8.79	5.51	6.32	1.86	2.55	3.15	2.33	0.9	0.64	0.51	0.83	48.53	49.77	40.47	46.42	37.14	30.22	29.72	27.2
Tcap	0.44	0	0	0.41	0.2	0.4	0.23	0.35	0.36	0.49	0.13	0.41	0.15	0.3	0.19	0	0.06	0.11	0	0	1.75	1.54	0.5	0.71	0.4	0.14	0.26	0
Crlf1	0.14	0.05	0.42	0.31	0.39	0.15	0.13	0.07	1.83	1.37	2.41	1.35	1.11	0.56	0.89	0.69	9.53	10.97	12.69	9.71	0.4	0.18	0.26	0.27	0.34	0.41	0.26	0.09
Cabs1	3.08	3.04	5.17	6.78	5.81	10.21	7.58	9.06	0.73	0.88	5.1	1.34	1.53	4.44	0.81	2.44	379.83	388.01	344.49	353.14	16.11	14.98	8.12	17.2	1.63	0.09	0.21	2.39
Hmgcll1	0	0	0.05	0.09	0.03	0.08	0.04	0	0.15	0.04	0.14	0.1	0.02	0.11	0.07	0.03	0.63	0.42	0.73	0.71	0.19	0.14	0.18	0.12	0.3	0.29	0.28	0.36
Ttc9b	0.06	0.11	0.14	0.13	0.03	0.03	0.03	0	0	0.03	0.03	0.03	0.03	0.03	0.06	0.06	0.13	0.37	0.4	0.4	0.03	0	0	0	0.03	0	0	0
Abhd8	7.14	1.13	4.58	3.86	7.42	5.8	6.05	2.92	5.86	6.55	7.38	5.73	7.57	6.46	6.67	5.83	56.24	56.72	66.21	60.63	7.16	6.74	5.94	6.31	5.55	4.8	6.36	4.52
1700008O03Rik	0.08	0.03	0.26	0.37	0.17	0.03	0.15	0.12	0.21	0.35	1.03	0.26	0.12	0.15	0.16	0.28	7.56	8.56	10.16	7.79	0.11	0.18	0	0.07	0.06	0.12	0.14	0.2
4930432K21Rik	1.76	0.32	0.76	1.08	6.47	4.01	6.15	3.43	1.68	1.98	2.43	1.71	0.27	0.68	0.26	0.4	28.16	26.67	28.1	28.63	2.92	2.38	1.7	2.15	2.39	3.35	3.83	3.36
Clstn3	0.07	0	0.01	0.05	0.14	0.05	0.15	0.03	1	0.91	0.92	0.58	0.02	0.01	0.08	0.02	1.82	2.16	2.21	2.55	0.07	0.06	0.08	0.07	0.86	0.66	0.7	0.88
Spib	0.11	0.05	0.02	0.07	0.3	0.2	0.26	0.04	0.47	1.07	0.73	0.63	0.15	0.02	0.02	0.05	0	0.02	0.04	0.02	0.13	0.13	0.44	0.02	0.2	0.17	0.36	0.16
Cers4	2.51	0.82	1.48	1.75	13.7	15.02	17.68	11.99	2.36	2.54	2.53	2.24	0.77	0.9	0.95	1.1	0.31	0.18	0.2	0.24	5.82	5.11	4.25	5.32	2.3	2.52	2.29	2.35
Adam21	0.22	0.1	0.26	0.2	0.07	0.13	0.17	0.25	0.38	0.25	0.48	0.31	0.14	0.24	0.1	0.22	11.19	12.53	14.89	12.96	0.39	0.36	0.49	0.4	0.37	0.25	0.26	0.52
Fut1	20.73	6.56	13.21	14.72	0.15	0.1	0.02	0.04	0	0.1	0.02	0.03	1.14	2.24	1.21	3.28	0.21	0.1	0.13	0.11	0	0	0.08	0.02	0	0	0	0
Rnf151	0.25	0.19	0.34	0.59	0.22	1.05	0.7	0.6	0.63	0.39	3.12	0.38	0.65	0.24	0.46	0.74	129.82	130.7	146.14	127.93	0.7	0.99	0.58	1.55	0.42	0.22	0.26	0.19
Elavl2	0.23	0.18	0.44	0.24	0	0.03	0.04	0.05	0.05	0.05	0.05	0	0.23	0.4	0.09	1.18	1.94	1.65	2.12	1.68	0.01	0.08	0.03	0.03	0.01	0.05	0.01	0
Pou2f2	0.14	0.12	0.21	0.24	0.24	0.29	0.35	0.19	0.41	0.48	0.46	0.22	0.42	0.28	0.45	0.31	2.94	2.35	2.92	2.76	0.26	0.37	0.93	0.28	0.49	0.21	0.3	0.29
Rbfox1	0.13	0.07	0.17	0.25	0.3	0.21	0.56	0.32	0.13	0.23	0.09	0.1	0.02	0.08	0.15	0.08	0.08	0.06	0.08	0.12	0.22	0.2	0.22	0.32	0.83	0.77	0.99	0.77
Tppp2	5.44	3.7	5.71	8.82	11.96	11.78	10.37	8.71	1.29	0.8	4.22	0.7	1.79	1.62	0.74	2.22	189.72	193.83	201.89	186.04	28.92	25.26	14.04	29.29	3.98	0.18	1.09	7.29
Acyp1	12.03	5.92	13.58	10.91	14.7	10.79	13.71	7.97	10.42	10.07	12.27	9.48	7.52	7.15	7.56	6.28	82.84	80.7	96.68	77.22	8.29	7.81	7.77	8.99	5.13	5.17	4.47	6.64
Vdac3	5.21	2.12	5.6	5.5	6.33	5.03	7.19	5.76	8.52	7.52	8.77	9.69	6.05	8.08	6.86	7.33	44.23	43.99	48.28	46.61	8.17	7.54	9.5	7.96	9.46	8.96	9.9	10.36
Bmp7	6.62	1.48	5.95	4.25	2.03	1.41	1.93	1.05	19.04	21.1	17.29	20.26	46.51	44.33	51.1	28.11	0.88	0.59	0.7	1	9.62	9.8	5	8.76	8.43	8.01	9.4	8.2
Cabp7	0.02	0.09	0.02	0.07	0	0.07	0	0	0	0.08	0.05	0.05	0	0	0.05	0	0	0.02	0.02	0.04	0.09	0.2	0.04	0.15	0	0	0	0.03
Derl3	47.63	11.2	30.76	34.87	1.65	0.38	1.22	0.59	0.31	0.35	1.5	0.3	71.34	59.17	85.98	70.93	16.73	14.62	15.25	16.83	1.48	0.93	2.2	1.06	0.38	0.4	0.61	0.17
Gstt4	0.43	0.24	0.06	0.33	0.67	0.91	1.03	0.69	0.92	0.62	2.72	0.2	0.51	0.47	0.19	0.52	153.5	138.14	154.04	124.67	0.67	1.52	0.77	1.45	0.07	0	0	0.16
2610028H24Rik	0.18	0.09	0	0	0	0.04	0.03	0	32.02	35.64	34.95	29.62	1.58	1.46	1.9	0.73	0.4	0.41	0.4	0.32	0.04	0	0.13	0.03	0.04	0.04	0	0
Spatc1l	0.36	0.23	0	0.24	0.58	0.56	0.17	0.29	0.51	0.3	3.22	0.29	0.53	0.26	0.27	0.28	63.61	66.87	76.04	63.51	0.4	0.7	0.28	0.67	0.14	0.05	0.28	0.17
Prr29	0.26	0.2	0.41	0.17	0.06	0.22	0.1	0	71.42	67.1	64.37	64.83	2.58	2.35	3.8	1.27	0.14	0.04	0	0.1	0.05	0	0	0.15	0.06	0.12	0	0
Fam163b	0.02	0	0	0.02	0	0	0	0	0.05	0	0.09	0.07	0.05	0.06	0.04	0	0.17	0.12	0.2	0.1	0.04	0	0	0	0.02	0	0.04	0.03
Ascl2	1.26	0.67	1.12	2.28	0.08	0.04	0.03	0.1	2.04	3.01	2.27	2.52	0.17	0.04	0.19	0.24	0.14	0.19	0.07	0.15	0.22	0.07	0.03	0.14	0.31	0.21	0.12	0.23
Lpo	0.06	0.03	0.1	0.04	0.26	0.11	0.23	0.08	0.16	0.07	0.11	0.22	0.43	0.47	0.27	0.26	0	0.05	0	0	0.06	0.06	0.04	0.11	0.04	0.02	0.04	0.15
Syn2	8.07	2.2	4.97	5.33	35.67	41.43	43.11	29.19	1.47	1.22	1.53	0.98	1.23	2.05	1.58	2.77	2.76	1.91	2.03	2.75	98.35	90.71	50.07	93.7	2.49	2.34	3.25	3.96
Otog	0	0	0	0	0	0	0.01	0	0.03	0.04	0.03	0.05	0	0.01	0	0	0.05	0.08	0.07	0.1	0	0	0.01	0	0	0	0	0
Odam	1.91	0.39	1.14	1.22	67.44	89.93	62.44	76.4	0	0	0	0	0.26	0.38	0.13	0.74	0	0	0	0	9.8	5.81	8.45	11.61	1.83	1.17	1.68	0.82
Tex15	0.09	0.07	0.25	0.28	0.96	0.86	1.48	1.54	0.2	0.1	0.78	0.25	0.32	0.42	0.28	0.41	33.17	30.55	37.68	32.97	0.61	0.72	0.49	0.6	2.88	3.35	2.47	2.9
Pla2g12b	0.05	0	0	0	0	0	0.05	0	3.38	2.06	4.34	4.18	0	0.21	0.11	0	0.1	0.05	0.3	0	0	0	0.1	0	0	0	0	0.07
Oit3	0.07	0	0.13	0.12	0.12	0.09	0.1	0.1	0.08	0.05	0.12	0.02	0.05	0.11	0.11	0.16	1.61	1.07	1.26	1.91	0.35	0.32	2.12	0.14	0.05	0.07	0.07	0.06
Kcnd1	4.04	1.13	2.48	2.86	9.91	12.45	11.07	7.01	2.17	1.78	2.03	1.85	0.4	0.19	0.22	0.38	0.23	0.29	0.33	0.21	3.19	2.8	2.62	2.55	0.74	0.76	0.68	0.37
Nuak2	5.37	1.52	3.21	3.82	1.01	1.17	0.71	0.68	18.26	16.56	11.98	10.75	1.58	2.1	2.18	1.24	2.46	2.36	3.24	3.22	1.41	1.17	4.32	1.17	1.66	1.67	1.6	1.69
Cox4i2	0.24	0.21	0.16	0.09	6.05	4.34	6.27	2.94	0.84	0.72	0.96	1.24	0.86	0.23	0.92	0.78	0.07	0.14	0.37	0.16	2.34	2.8	1.66	1.53	1.03	0.73	0.93	0.72
Wnt3a	0.21	0.14	0.32	0.12	0.28	0.14	0.16	0.04	0	0	0	0	0.08	0.06	0.02	0.07	0.67	1.22	1.52	0.96	0.28	0.19	0.11	0.14	0.23	0.14	0.2	0.08
Zmynd10	1.75	0.48	1.32	2	11.58	12.06	11.2	9.42	17.12	20.15	20.48	17.97	1.82	1.68	1.49	0.79	136.02	134.45	117.67	145.03	5.76	5.31	2.97	5.43	0.39	0.19	0.49	0.34
Hyal2	9.92	2.93	7.47	7.24	4.94	3.35	4.92	2.66	28.75	30.63	27.59	32.27	6.25	5.29	6.35	7.46	2.06	1.48	1.71	1.35	5.84	5.19	5.15	4.44	4	4.31	3.7	3.92
Hyal1	2.15	1.24	1.96	2	1.79	1.55	2.39	1.1	33.34	36.79	35.02	36.79	2.99	3.32	3.1	2.08	0.51	0.36	0.56	0.75	2.31	2.33	2.97	2.03	2.6	2.68	2.99	1.79
Slc38a3	0.41	0.07	0.11	0.12	0.02	0.04	0.05	0.04	30.77	26.86	30.47	33	1.91	1.27	2.05	0.74	0	0	0.05	0	0.13	0.09	0	0.07	0.52	0.44	0.61	0.71
Rnf112	0.11	0.05	0.04	0.06	0.18	0.38	0.25	0.19	0.41	0.33	0.43	0.06	0.02	0.09	0.15	0.08	5.49	5.93	4.34	7.11	0.3	0.22	0.15	0.19	0.64	0.51	1.12	0.71
Slc3a2	138.31	45.26	111.54	92.12	45.8	45.09	48.36	29.24	33	29.9	26.24	28.36	244.31	238.27	249.45	218.27	29.77	36.85	33.39	35.12	42.1	40.25	46.32	36.4	63.64	55.77	66.13	65.53
Pifo	0.62	0.08	0.49	0.13	0.2	0.2	0.17	0.12	28.82	24.34	25.09	26.15	2.12	1.97	1.47	1.26	79.67	89.15	98.37	88	0.68	0.43	0.22	0.18	0.13	0	0	0
Spire2	3.18	1.18	2.24	2.26	1.3	1.21	1.52	0.92	4.37	4.28	3.98	4.33	0.51	0.93	0.47	0.95	12.6	12.33	11.48	13.19	1.62	1.48	1.11	1.35	2.61	3.95	3.41	4.35
Tex14	0.29	0.13	0.32	0.27	0.19	0.33	0.29	0.27	0.24	0.31	0.64	0.31	0.28	0.44	0.22	0.36	24.47	22.59	22.91	25.11	0.43	0.47	0.41	0.45	0.24	0.38	0.14	0.36
Eya4	0.24	0.2	0.2	0.27	0.46	0.57	0.49	0.45	0.13	0.24	0.7	0.28	0.17	0.1	0.06	0.19	14.84	14.92	16.27	14.66	1.19	1.41	1.72	1.15	2.62	3.27	2.59	2.87
Gm266	35.23	11.49	39.51	32.58	6.56	6.06	7.34	3.82	2.7	2.12	1.68	1.18	13.24	15.05	15.52	19.2	0.63	0.97	0.9	0.73	2.04	2.55	2.31	1.8	0.72	0.27	0.66	0.56
Tsacc	5.44	2.8	3.39	3.96	2.04	2.19	2.4	1.84	5.24	3.75	4.58	3.36	3.5	5.43	2.54	3.58	43.01	38.93	41.11	36.46	4.24	2.73	2.03	1.49	2.09	1.33	1.65	2.38
Apol7a	0	0	0	0	0	0	0	0.05	0	0.08	0	0	0	0	0	0.03	0	0.02	0.07	0.05	0	0	0.09	0	0.11	0.36	0.08	0.09
Acaa1b	0.46	0.18	0.31	0.57	0.11	0.15	0.43	0.07	1.46	1.64	1.48	2.16	0.5	0.17	0.51	0.19	0.32	0.09	0.23	0.21	0.14	0.17	0.25	0.13	0.3	0.28	0.4	0.22
Tnfrsf22	0.16	0.05	0.18	0.11	0.08	0.18	0.19	0.04	0.33	0.36	0.32	0.31	0.29	0.21	0.19	0.21	0.26	0.25	0.24	0.2	0.43	0.46	0.42	0.44	1.63	1.41	1.67	1.17
Phlda2	4	1.41	6.36	3.81	0	0	0	0	0.45	0.52	0.51	0.69	12.38	10.72	13.14	14.95	0.22	0	0	0	0	0.08	0	0.15	0.17	0	0.16	0
Mcoln2	0.05	0.09	0	0.08	0.1	0.25	0.18	0.11	0.08	0.18	0.23	0.18	0.25	0.18	0.12	0.25	0.19	0.18	0.5	0.35	0.33	0.42	3.76	0.13	0.25	0.24	0.17	0.21
Slc5a1	0	0	0.03	0	0	0	0	0	0.15	0.23	0.19	0.17	0	0.01	0	0.02	0.04	0.02	0.03	0.01	0	0.03	0	0	0.05	0.02	0.03	0
Cfap161	1.43	0.69	1.27	1.07	0.04	0.22	0.15	0.31	8.13	7.77	9.08	7.31	0.68	0.96	0.49	0.48	26.63	28.41	24.45	30.59	0.31	0.31	0.3	0.47	0	0.12	0	0.05
Vipr2	0.49	0.2	0.29	0.49	0.48	0.48	0.49	0.36	0.51	0.14	0.34	0.38	0.21	0.19	0.29	0.11	0.03	0.06	0.03	0.07	0.7	0.5	0.56	0.5	1.35	1.46	1.49	1.62
Plin5	3.65	0.81	2.34	1.74	14.5	10.19	14.47	9.57	16.42	15.11	14.4	13.21	0.92	1.5	1.35	1.81	0.88	0.85	0.71	0.74	3.48	3.24	1.94	3.81	0.35	0.3	0.31	0.15
Slc25a41	0.05	0	0	0.05	0.05	0.1	0.09	0	0.45	0.81	0.47	0.58	0.11	0.14	0.3	0	13.63	15.3	19.07	13.08	0.19	0.1	0	0.18	0.05	0.05	0	0
Sptbn4	0.12	0.04	0.02	0.14	0.05	0.06	0.09	0.04	0.12	0.15	0.23	0.1	0.09	0.11	0.11	0	3.27	3.51	3.21	3.72	0.06	0.07	0.02	0.08	0.06	0.05	0.05	0.02
Git1	28.26	8.67	19.75	17.87	20.38	21.62	20.31	12	29.45	30.5	32.08	29.79	22.55	19.65	22.75	19.1	198.86	190.7	185.98	193.68	24.24	22.95	20.37	22.95	14.52	13.54	14.84	13.15
Crybg2	0.48	0.19	0.28	0.33	1.48	2.44	2.01	1.48	0.34	0.56	0.34	0.3	0.04	0.08	0.23	0.09	0.42	0.48	0.26	0.4	0.77	0.64	0.43	0.52	0.26	0.35	0.2	0.32
Ubxn11	12.67	3.97	6.86	8.55	11.74	10.16	12.07	7.23	46.28	47.81	50.03	44.05	4.41	5.88	5.03	3.75	87.29	94.94	81.72	98.28	15.89	17.59	8.41	14.8	10.21	9.4	10.04	8.27
Mogat1	0.05	0	0	0.05	0.21	0.1	0.27	0.18	0.56	0.92	0.68	1.43	0	0	0.05	0	0.04	0.13	0.09	0	0	0.05	0	0.05	0.46	0.33	0.1	0.24
Tex22	1.03	0.06	0.41	0.46	0.76	0.69	1.01	0.31	1.13	0.94	2.27	0.87	0.72	1.08	0.48	0.65	79.75	76.36	77.49	70.69	0.79	0.6	0.88	1.28	0.45	0.16	0.59	0.3
Nanog	0.19	0.07	0.24	0.35	0	0	0	0	0.06	0	0.03	0	0	0	0	0.03	0.02	0.02	0.05	0.08	0	0	0.02	0.03	0.03	0.03	0.06	0
Kif11	0.44	0.19	0.66	0.52	0.63	0.48	0.62	0.33	1.73	1.61	2.19	1.55	1.29	1.3	1.23	0.94	16.04	13.01	12.85	16.35	0.75	0.68	1.28	0.73	0.95	0.82	0.79	1.14
Ttll5	5.58	3.77	6.06	6.14	4.75	5	5.17	3.51	11.98	10.61	13.86	12.08	8.63	9.21	7.86	7.58	74.13	68.63	68.71	75.69	6.21	5.49	5.65	4.84	4.58	4.95	4.99	5.31
Retn	0.1	0.13	0.66	0.45	2.09	6.52	9.62	2.67	34.63	36.8	23.59	48.59	0.49	0.1	0.64	0.28	1.72	1.62	1.63	1.3	2.02	0.57	0.09	0.25	5.24	9.37	4.69	2.64
Cdh23	0.1	0.03	0.08	0.06	0.06	0.1	0.12	0.05	0.2	0.16	0.64	0.16	0.1	0.1	0.06	0.03	9.66	9.13	11.31	10.23	0.18	0.11	0.13	0.13	0.15	0.07	0.12	0.09
2200002J24Rik	0.48	0	0.19	0.21	0.11	0	0.09	0.09	0	0.11	0.21	0.11	0	0	0.2	0.21	18.01	16.49	17.35	18.06	0.29	0.29	0.09	0.09	1.13	0.11	0.81	0.74
Etv5	19.47	6.01	30.47	12.31	2.86	3.42	3.02	2.13	3.22	3.24	3.57	2.85	212.21	192.86	208.85	163.4	6.33	5.88	5.66	7.35	5.46	5.39	3.9	5.5	12.21	11.81	14.67	12.69
Enkd1	1.45	0.55	1.47	1.09	1.59	1.27	1.22	0.76	5.14	5.93	6.52	5.69	1.11	1.28	0.82	1.38	19.77	22.05	20.83	20.01	1.02	1.26	1.07	1.12	1.09	1.03	1.07	1.07
Iglon5	0.07	0.15	0.22	0.1	0.07	0.05	0.08	0.02	0.08	0.13	0.17	0.17	0.08	0.07	0.05	0.14	1.17	1.17	1.35	1.29	0.2	0.25	0.3	0.28	0.53	0.36	0.47	0.49
Card14	2.19	0.65	1.34	1.36	0.35	0.62	0.62	0.33	5.72	5.23	5.64	4.44	0.28	0.48	0.58	0.36	0.32	0.22	0.16	0.24	0.42	0.32	0.89	0.49	1.16	0.79	0.94	0.77
Bcas1	0.12	0.03	0.12	0.11	0.11	0.13	0.23	0.11	0.49	0.54	0.43	0.53	2.16	1.47	2.07	0.64	3.79	3.4	3.49	3.18	0.18	0.24	0.02	0.13	0.06	0.05	0.06	0.08
Aldh1a2	6.82	2.32	6.13	5.67	10.9	12.27	10.83	7.42	5.71	5.52	5.45	4.4	5.07	4.62	3.85	3.04	43.91	43.19	41.87	45.83	8.59	9.18	14.04	9.58	9.26	10.22	9.57	8.49
Snx31	0.07	0	0.09	0	0.24	0.67	0.6	0.29	0.1	0	0.02	0	0	0.06	0.02	0.02	0.26	0.15	0.18	0.31	2.17	1.89	1.57	1.66	1.54	1.06	2.14	2.84
Lypd8	1665.03	842.59	1441.79	958.18	2.58	0	0.09	0.05	1.46	0.05	0.1	0.11	1.03	108.05	29.99	540.2	0.76	1.13	0.67	0.92	1.21	1.83	2.08	2.34	0.57	0.44	0.2	0.18
1810065E05Rik	0.26	0	0.06	0.07	0	0	0	0.12	0	0	0	0	0.08	0	0	0.07	3.59	4.59	5.23	3.77	0.06	0.13	0.11	0.12	0	0	0	0
4933402N03Rik	0.2	0.04	0.03	0.11	0.07	0.03	0.09	0.15	0.04	0	0.04	0	0.08	0.34	0.03	0	16.58	16.3	12.91	16.51	0.36	0	0.09	0.21	0.07	0	0	0.04
Tnfaip8l2	0.74	0.34	1.03	0.4	2.98	1.5	1.58	1.03	2.25	2.95	1.71	2.26	1.43	0.61	1.47	1.24	0.05	0.27	0.15	0.32	3.16	2.19	15.13	2.3	1.18	1.07	0.83	1.34
Elof1	39.69	19.63	42.06	39.66	48.24	31.91	38.54	24.6	147.77	144.66	152.43	133.38	47.57	46.4	52.92	48.63	333.43	364.71	385.93	328.15	39.47	34.1	32.14	37.35	35	36.86	39.25	38.79
St3gal1	5.76	1.35	5.38	2.88	10.5	9.85	11.88	6.39	4.06	4.73	4.4	4.34	22.55	19.65	25.45	19.09	0.63	0.99	0.91	1.14	3.74	3.52	6.5	2.58	6.26	6.52	5.33	4.9
Pax5	0.08	0.01	0.04	0.06	0.09	0.12	0.12	0.06	0.11	0.1	0.19	0.07	0.13	0.02	0.07	0.06	2.92	3.28	4.02	3.09	0.07	0.08	0.07	0.04	0.16	0.16	0.08	0.03
Tctex1d2	2.94	1.03	2.07	2.91	2.59	2.2	3.16	2.18	5.54	5.64	7.38	6.31	2.37	2.94	2.66	2.08	30.49	29.45	33.28	31.39	2.85	2.66	3.48	2.83	3.75	3.25	3.25	2.82
Sval2	0.18	0.12	0.09	0	0	0.19	0.34	0.09	0	0	0	0	0	0	0	0	0.25	0.47	0.17	0.09	0	0	0	0	0	0	0	0
Zswim7	6.33	2.19	5.31	4.12	4.66	2.9	3.78	2.79	4.76	5.51	4.19	3.47	3.06	4.06	2.08	2.76	29	25.33	30.8	25.04	5.25	4.16	3.76	4.74	3.6	5.01	4.41	2.56
Glis2	4.15	1.6	3.38	2.62	3.32	3.12	4.12	1.92	50.59	51.5	47.23	53.92	4.31	3.66	4.5	3.63	1.16	0.93	1.05	1.27	5.03	4.47	5.3	4.24	8.05	8.42	7.9	6.85
Bicc1	6.09	3.37	6.58	5.62	8.51	9.72	10.57	6.8	80.89	83.1	79.17	91.73	8.64	9.2	11.63	7.38	2	1.74	2.18	2.3	11.66	9.9	12.49	10.82	7.36	6.4	6.76	6.58
Pkd2l2	0.05	0.22	0.24	0.42	0.24	0.2	0.18	0.18	0.44	0.24	0.75	0.32	0.31	0.21	0.07	0.1	23.01	21.69	20.45	23.01	0.43	0.1	0.15	0.32	0.18	0.43	0.15	0.21
Chrne	0.22	0.05	0.54	0.24	0.08	0.04	0.27	0.1	0.3	0.25	0.51	0.16	0.26	0.25	0.19	0.12	25.53	26.15	25.58	23.16	0.22	0.11	0.26	0.21	0.04	0.08	0.08	0.23
Hoxa2	1.04	0.3	1.21	0.61	0.14	0.28	0.37	0.19	3.5	3.35	4.11	2.42	1.38	1.19	2.13	2.03	0.03	0	0.09	0.03	0.2	0.16	0.51	0.13	0.57	0.68	0.59	0.17
Adam28	77.38	25.97	152.55	77.41	0.36	0.05	0.07	0.03	0.06	0	0	0	1387.06	1490.55	1550.07	982.58	0.04	0	0.01	0.03	0.03	0.03	0.07	0.11	0.14	0.18	0.07	0.12
Ankrd53	0.38	0.04	0.13	0.52	0.26	0.29	0.48	0.32	0.67	0.61	1.88	0.26	1.25	1.18	1.75	0.8	37.59	40.91	40.93	33.59	0.51	0.3	0.52	0.35	0	0	0.18	0.09
Nol3	2.5	1.47	1.57	1.82	0.3	0.35	0.28	0.21	0.62	0.9	0.38	0.72	0.33	0.25	0.35	0.64	0.07	0.02	0.02	0	0.3	0.26	0.25	0.23	0.89	0.63	0.63	0.69
Slc9a5	2.24	0.31	0.88	0.9	0.63	0.46	0.71	0.21	1.1	0.95	1.45	0.95	0.49	0.46	0.71	0.56	13.78	12.47	11.72	14.02	0.88	0.72	0.71	0.68	1.09	0.65	0.7	0.49
Stc1	11.41	6.4	12.07	17.55	11.18	11.04	12.74	9.99	0.33	0.33	0.43	0.47	0.37	0.68	0.42	0.32	0.08	0.06	0.05	0.08	29.79	25.86	16.44	26.32	9.29	7.61	8.97	12.93
4931428F04Rik	4.61	1.8	3.15	3.36	3.67	2.71	3.51	1.69	1.83	1.28	1.71	1.94	1.08	1.05	1.2	1.01	25.39	24.54	25.26	25.36	3.26	2.65	2	2.43	2.32	1.82	1.8	1.42
Tppp3	3.87	1.53	3.66	2.34	7.41	6.44	5.43	3.64	141.48	138.48	129.73	110.73	8.12	7.33	11.59	6.84	4.85	6.46	6.48	6.69	10.38	8.27	7.35	6.38	6.97	8.93	7.6	5.81
Galns	6.15	1.76	4.72	4.11	2.59	2.86	3.51	1.92	38.21	35.19	31.75	30.79	12.45	11.31	12.96	9.59	2.94	3.29	2.51	3.21	3.49	3.57	20.27	4.23	7.66	8.24	7.86	7.25
Gata2	6.37	3.03	5.85	4.83	4.09	5.11	3.63	2.27	9.19	7.76	8.4	9.24	3.98	4	4.61	4.05	3.88	4.53	5.93	3.53	36.29	41.95	22.48	38.04	62.98	64.89	61.83	41.11
C8g	4.23	0.66	2.88	2.18	3.8	3.69	3.37	1.78	2.44	2.24	2.17	2.15	1.34	1.74	1.54	2.09	10.63	11.98	12.55	10.49	4.06	4.84	2.53	3.22	3.28	2.96	3.89	4.9
Ptgds	674.67	208.32	481.69	447.2	1250.45	1373.23	1128.4	832.91	77.28	86	76.6	69.43	20.14	37.94	26.72	79.42	102.26	111.86	88.96	94.4	2437.38	1987.69	956.67	1868.24	4.83	8.34	5.99	8.09
Clic3	12.22	3.99	9.93	9.99	105.54	71.56	108.32	67.56	5.96	4.47	5.78	5.6	5.11	4.05	4.39	6.47	0	0.11	0.18	0	62.92	65.27	46.26	64.63	2.53	2.91	3.18	1.96
Fbxw5	27.94	7.19	21.46	18.3	21.75	20.74	22.23	12.47	25.05	22.51	27.81	22.69	18.43	17.25	17.38	17.18	130.65	128.41	124.87	140.19	25.18	22.81	19.13	21.32	27	24.91	26.79	23.39
Actn1	18.43	7.64	18.98	16.7	12.41	12.01	11.03	5.65	36.58	34.39	33	34.68	14.31	12.9	16.93	16.44	3.13	2.95	3.84	3.21	34.74	37.97	39.59	32.6	118.85	109.87	124.72	94.91
Map2	0.53	0.28	0.85	0.65	0.91	0.56	0.78	0.78	1.68	2.18	3.08	2.43	2.47	1.92	2.34	1.92	15.42	16.53	18.17	15.28	0.69	0.65	0.74	0.76	3.06	3.66	3.08	3.61
Slamf6	0.21	0.05	0.28	0.13	0	0.07	0.09	0.03	0.07	0.1	0.09	0.1	3.75	3.3	2.3	1.58	0.01	0.02	0.01	0.04	0.08	0.07	0.22	0.02	0.13	0.07	0.11	0.1
Slamf1	0	0.02	0	0	0.03	0.01	0.03	0.01	0.02	0	0.01	0	0	0	0	0	0.37	0.27	0.26	0.25	0.03	0	0.07	0	0.04	0.05	0.03	0
Endog	7.37	1.79	6.06	5.25	5.38	4.41	5.63	2.08	86.82	84.34	89.55	72.59	7.77	8.98	9.7	8.8	1.13	1.25	1.33	1.56	7.17	6.45	6.52	8.59	8.21	4.77	5.55	5.09
Pcolce2	0.16	0.03	0.22	0.2	0.68	0.59	0.59	0.34	4.05	4.39	4.11	3.71	0.47	0.59	0.48	0.2	0.44	0.43	0.61	0.35	1.8	2.26	1.12	1.88	1.37	1.5	1.47	1.52
Tmem27	0.04	0	0.04	0	0.09	0.04	0	0	3.94	3.67	4.47	3.94	0.1	0.25	0.09	0	0	0	0	0.04	0.13	0.08	0.08	0.24	0	0	0	0
Ace2	0.3	0.38	1.09	0.43	0.61	0.87	0.57	0.48	0.08	0.17	0.16	0.22	4.79	5.24	5.88	3.27	0.21	0.2	0.15	0.12	2	2.03	1.08	2.57	0.53	0.45	0.4	0.25
Fam163a	0	0	0	0	0	0	0.01	0	0.12	0.17	0.18	0.23	0.02	0.03	0.02	0	0.01	0	0.03	0.05	0	0	0	0	0.05	0.02	0	0
Hivep2	10.65	4.18	9.26	8.16	35.41	36.37	39.49	30.99	8.47	8.6	7.44	7.59	9.82	10.22	10.23	9.57	1.22	1.05	1.35	1.21	19.34	20.46	14.51	18.28	12.17	11.46	11.71	10.84
Itga2	0.58	0.29	0.88	0.82	0.63	0.58	0.86	0.61	0.74	0.73	0.74	0.6	2.05	1.94	1.55	1.51	1.03	0.86	0.84	0.84	1.04	0.73	1.7	0.69	27.58	22.48	33.7	34.32
Lpl	2.18	1.04	4.63	1.48	5.48	12.16	23.59	5.92	63.63	82.33	62.42	77.85	2.13	1.54	3.62	1.8	0.33	0.25	0.26	0.42	7.49	4.33	146.37	4.02	21.47	32.43	16.74	6.11
Ttbk1	0.53	0.3	0.34	0.47	0.99	1.15	0.9	0.58	0.31	0.24	1.37	0.36	0.13	0.31	0.15	0.11	27.29	27.45	28.43	30.2	1.68	1.94	0.78	1.93	0.21	0.08	0.03	0.29
Gata3	23.78	7.47	20.22	15.49	20.36	25.79	24.68	13.47	0.51	0.41	0.96	0.32	22.96	19.87	21.3	23.91	0.44	0.38	0.42	0.61	29.75	27.27	19.28	28.52	149.11	146.42	158.48	105.94
Gata5	0.09	0.14	0.09	0.16	0.26	0.36	0.24	0.29	0.52	0.63	0.45	0.42	0.04	0.02	0.07	0	0.05	0.11	0	0.04	0.31	0.2	0.06	0.32	3.3	3.58	3.9	3.41
Lama5	17.79	4.48	11.37	8.71	7.98	8.06	10.09	5.25	65.05	62.6	65.6	56.54	12.56	11.24	15.93	12.52	1.43	1.43	1.64	1.85	15.93	15.84	13.49	14.8	25.4	24.81	27.46	18.12
Steap1	0.24	0	0.47	0	0	0.05	0.14	0	5.89	4.78	5.62	6.35	1.08	1.07	1.49	0.72	1.02	0.96	0.62	0.87	0	0.05	0.13	0.09	0.31	0.49	0.5	1.4
Steap2	0.61	0.31	0.64	0.68	0.46	0.69	0.89	0.82	10.54	9.4	10.54	12.36	1.36	1.09	1.92	0.82	1.3	1.08	0.98	1.19	0.76	0.59	0.99	0.78	1.97	1.63	1.44	2.01
Anxa9	14.33	6.72	13.64	10.86	2.78	5.1	4.91	3.22	5.55	5.16	4.75	4.66	19.73	16.76	14.47	15.67	3.26	3.45	3.52	3.79	94.34	88.54	56.84	97.8	7.65	5.13	4.74	6.06
Arnt2	32.15	10.24	18.16	19.54	32.44	30.71	36.21	22.1	11.35	13.09	12.04	14.54	7.67	6.44	8.39	8.79	0.96	0.89	1.01	1.07	9.31	6.13	6.45	8.37	0.2	0.22	0.19	0.36
Abo	4.43	1.68	3.33	3.51	32.77	25.69	33.14	21.93	6.68	5	5.93	7.91	0.19	0.25	0.54	0.21	1.21	0.79	1.41	1.34	10.77	7.63	8.76	8.91	5.89	4.42	3.77	2.53
Cd5l	0.15	0	0.17	0.19	0.28	0.43	0.3	0.24	0.24	0.16	0.47	0.1	0	0.2	0.12	0.09	3.27	3.25	3.64	3.46	0.67	0.2	5.3	0.41	0.74	0.46	0.12	0.63
Fam184b	4.25	1.74	2.95	2.97	11.57	10.82	13.36	8.72	1.76	1.83	1.48	1.66	2.38	3.08	2.65	2.36	0.11	0.33	0.22	0.31	1.49	1.42	1.35	1.09	0.96	0.43	0.43	0.43
Ncapg	0.13	0.1	0.26	0.4	0.29	0.24	0.26	0.29	0.34	0.1	0.53	0.23	0.23	0.63	0.63	0.29	18.93	16.98	17.04	18.38	0.28	0.4	0.68	0.34	0.52	0.25	0.53	0.57
Amdhd1	1.54	1.42	1.53	2.28	0.03	0.03	0.09	0.02	0.2	0	0.11	0.11	0	0.02	0.05	0.05	0.02	0.08	0.02	0.02	0	0.02	0	0	0	0.19	0.03	0
Wnt11	0.09	0.02	0	0	0	0.11	0.18	0.03	3.78	2.66	3.19	2.83	0.2	0.08	0.09	0.05	0.14	0.16	0.03	0.24	0.09	0.24	0.18	0.13	0.44	0.41	0.23	0.15
1700016C15Rik	0.23	0	0	0.17	0.17	0.08	0.5	0.29	0.53	0.26	1.25	0.59	0.27	0.67	0	0.33	60.74	53.42	44.67	54.73	0.62	0.46	0.14	0.36	0	0	0	0
Lrrc27	4.86	2.6	4.09	5.47	1.61	3.25	2.38	2.2	5.34	4.91	9.08	5.24	3.77	4.62	3.7	3.86	226.17	231.52	223.67	216.72	4.92	4.82	6.43	4.37	3.18	2.87	3.17	3.13
Lbp	22.19	9.64	24.14	18.9	41.22	36.78	46.05	28.63	153.68	140.53	149.58	142.43	21.11	20.64	22.74	18.6	3.03	2.84	4.16	4.82	34.49	33.49	42.66	33.59	31.41	28.69	32.73	32.56
Celsr1	6.84	1.63	4.38	2.9	1.16	1.57	1.69	0.76	82.15	79.36	78.84	75.38	6.46	5.83	7.75	5.13	0.09	0.18	0.09	0.09	6.98	6.25	4.28	5.91	6.95	6.87	6.91	4.75
Stard13	2.31	1.08	2.47	2.27	1.88	2	2.51	1.31	21.96	19.29	21.41	16.72	2.17	2.38	3.4	2.14	2.31	2.61	2.36	2.74	2.27	1.93	2.54	2.12	5.32	5.29	4.66	4.24
Tenm1	0.02	0.02	0.02	0.02	0.46	0.57	0.7	0.61	0.01	0.01	0	0.02	0	0	0	0	0.01	0	0.01	0.01	0.09	0.06	0.06	0.09	0.06	0.02	0.02	0.02
Camk1g	0.14	0.09	0.28	0.1	0.08	0.25	0.11	0.04	0.97	1.31	1.4	1.37	0.11	0.05	0.1	0.18	1.88	1.8	2.16	2.11	0.05	0.05	0.24	0.09	0.03	0.03	0.08	0.12
Tubb1	0	0	0.04	0	0	0	0.08	0.04	0	0	0	0	0	0.04	0.09	0.04	0.04	0	0	0.04	0.13	0	0.15	0.04	0.27	0.24	0.13	0.27
Eef1a2	0	0	0.03	0	0	0	0	0	0.03	0	0	0.03	0	0	0	0	0	0	0.13	0.03	1.08	0.56	4.06	0.03	0	0	0	0
Col20a1	1.3	0.24	0.86	0.9	1.28	1.1	1.94	0.83	1.39	1.19	1.3	1.25	0.7	0.82	0.72	0.62	12.38	11.36	9.92	11.25	2.01	1.58	1.31	1.37	2.83	2.97	2.88	1.92
Pls3	257.97	174.25	317.42	420.02	98.96	106.54	117.36	98.96	91.67	87.65	94.76	102.47	70.01	89.04	72.74	90.56	4.06	3.67	3.8	3.81	104.26	101.17	86.83	102.04	81.96	84.86	80.66	81.46
Mpped2	5.27	2.17	3.57	5.02	8.96	7.39	10.69	7.64	0.58	0.86	0.31	0.59	2.26	1.79	2.01	2.29	0.52	0.43	0.5	0.27	4.19	4.07	3.23	4.58	4.78	5.62	3.94	5.09
Dyrk3	1.29	0.72	1.25	1.36	2.62	1.91	2.27	1.89	9.72	8.84	10.84	8.4	1.39	1.54	1.64	0.84	54.04	59.62	64.38	55.27	1.35	1.7	0.97	1.26	0.18	0.27	0.27	0.5
Foxred2	16.25	3.17	6.21	8.12	111.18	112.67	124.99	75.51	36.06	36.84	34.54	35.8	2.41	2.49	2.08	1.91	0.33	0.37	0.19	0.48	81.13	79.16	46.76	77.18	16.05	13.94	14.45	20.32
Nlrp14	0.04	0	0.12	0.08	0.1	0.36	0.19	0.41	0.21	0.14	0.96	0.06	0.15	0.37	0.02	0.14	47.92	46.4	49.18	49.05	0.31	0.45	0.26	0.45	0.04	0.06	0	0.25
Bik	1.26	0.08	1.05	1.36	1.36	1.13	1.29	0.76	8.55	10.87	10.85	9.53	0.52	0.67	0.78	0.8	2.55	2.28	2.14	4.07	1.44	1.68	1.68	1.49	1.8	2.19	1.58	3.19
Scube1	41.08	17.39	33.72	27.56	0.47	0.38	0.3	0.13	25.45	25.38	23.13	21.34	4.8	5.2	9.69	11.4	0.39	0.41	0.38	0.3	0.27	0.26	0.55	0.37	0.88	0.9	0.84	0.88
Sulf1	2.53	1.28	2.89	2.61	4.4	4.86	6.77	4.51	3.85	4.49	3.55	3.55	1.57	1.66	2.19	1.81	3.96	3.17	3.34	4.78	10.78	11.37	19.11	11.23	27.27	30.25	31.86	28.3
Plcg1	41.77	16.53	42.98	24.35	15.14	16.39	19.35	10.53	42.38	46.42	43.23	41.41	128.71	127.56	133.78	111.34	9.23	8.91	8.09	10	20.86	22.01	19.05	20.09	24.06	23.26	25.09	21.27
Matn4	0.09	0	0.03	0.05	0.3	0.23	0.31	0.15	0.32	0.31	0.2	0.28	0.1	0.08	0.01	0.12	0.05	0.06	0.03	0	0.22	0.17	0.14	0.16	0.44	0.86	0.75	0.51
Svs4	0	0	0	0	0	0.09	0.38	0	0.19	0.09	0	0	0	0	0	0	0.22	0.35	0.82	0.57	5.58	4.97	3.98	3.22	0.34	0	0.34	0.72
Slpi	2.98	2.35	2.45	2.56	9.91	7.2	12.45	7.25	22.87	33.36	13.29	18.51	3.83	2.48	4.53	4.47	0.06	0.12	0.06	0.2	3.71	3.21	3.5	2.88	30.46	28.4	23.66	29.49
Svs3a	0	0	0	0	0	0.05	0	0	0	0	0	0	0	0	0	0	0	0	0	0	0.25	0.15	0.53	0.38	0	0	0	0
Ccdc70	0.06	0.07	0.17	0.12	0.18	0.53	0.32	0.31	0.19	0.06	1.46	0.19	0.27	1.03	0.12	0.24	79.51	80.28	71.76	72.07	0.73	0.78	0.85	1.12	0	0	0	0.21
Brca1	0.79	0.31	0.94	1.1	0.7	0.68	0.76	0.5	1.27	0.93	1.43	1.37	0.71	1.15	0.95	0.71	7.95	7.76	9.48	8.89	2.03	2.41	2.08	2.08	0.7	0.59	0.81	0.63
Zpbp2	0.64	0.34	0.18	0.2	0.77	1.31	1.97	1.79	0.78	0.25	3	0.41	0.8	1.27	0.23	0.32	123.27	122.8	121.99	125.92	0.82	1	0.47	1.21	0.12	0.25	0.08	0.19
Gsdma	0.02	0	0	0.02	0.07	0.02	0.04	0.02	0.05	0.02	0.05	0.07	0.03	0.02	0	0	2.36	2.54	2.16	2.86	0.11	0.02	0.04	0.14	0.09	0.02	0	0
Tnnc2	0.51	0.11	0	0.09	0	0	0	0	0	0.38	0.37	0.28	0	0.33	0.61	0	0.39	0.22	0.86	0.25	5.07	4.77	3.55	3.28	67.9	61.74	54.52	52.56
Spint4	604.04	84	212.84	583.98	12.76	93.38	24.62	4.93	0.18	0	0	0	0	0.38	0.16	0	0	0	0	0	0	0	0.49	0.9	0	0	0	0
Mpp2	53.92	17.09	34.17	32.05	9.97	9.5	8.23	5.12	13.44	12.22	12.61	8.39	28.85	32.71	30.85	32.56	0.33	0.26	0.32	0.22	3.69	3.7	2.7	2.78	6.62	5.73	7.48	5.38
Ppy	18.05	8.85	16.48	15.4	0	0	0	0	0	0	0	0	0.14	1.49	0.98	7.21	0	0	0	0	0	0	0	0	0	0	0	0
Pipox	1.16	0.65	0.41	0.32	10.17	10.94	12.14	6.97	110.04	107.35	105.69	110.45	7.95	8.49	9.13	4.21	0.27	0.74	0.35	0.15	3.17	2.08	3.81	3.45	0.28	0.13	0.12	0.26
Igfbp4	8.52	3.15	9.3	8.09	17.5	15.75	18.99	8.3	143.58	138.65	140.04	139.8	20.51	21.31	21.86	19.01	3.32	3.6	4.16	3.8	19.83	15.73	29.28	15.78	47.96	43	44.74	44.53
Rab11fip4	113.86	38.41	73.54	66.89	15.25	16.5	17.22	9.18	33.35	34.39	34.4	31.58	22.89	25.62	21.97	33.19	4.13	4.19	3.91	5.17	22.66	20.49	13.41	19.49	12.31	9.32	9.93	8.4
Birc5	0.32	0.05	0.47	0.5	0.25	0.19	0.32	0.22	0.76	0.5	1.25	0.49	0.4	0.62	0.62	0.47	14.27	15.21	13.13	12.98	0.67	0.56	0.98	0.52	0.6	0.44	0.54	0.36
Trp53tg5	0	0.08	0.06	0.07	0.14	0.2	0.3	0.35	0.07	0.14	0.21	0.14	0.15	0.61	0.2	0.27	76.18	61.04	60.63	63.68	0.25	0.44	0.17	0	0	0	0	0
Wfdc2	2.59	0.81	3.62	1.81	3.56	1.99	1.3	2.67	21.98	24.69	15.97	19.48	6.92	7.13	7.33	11.02	0.13	0	0.13	0	1.32	0.9	0.75	0.79	0.3	0.79	0.37	0.53
Etv4	8.15	2.04	10.28	6.48	0.64	0.29	0.55	0.28	0.29	0.08	0.27	0.08	100.52	88.44	107.64	75.36	0.14	0.24	0.14	0.25	0.54	0.56	0.31	0.35	2.28	2.17	3.06	2.07
Eppin	186.48	102.07	205.23	150.41	354.03	332.94	310.49	232.85	8.96	8.58	8.96	7.28	165.55	196.54	162.06	239.64	24.55	28.84	31.71	25.84	61.86	53.45	38.27	47.81	1.21	2.06	0.96	1.25
Mmp9	1.74	0.72	1.77	1.41	2.79	2.87	2.82	1.83	3.98	3.21	2.6	2.91	0.75	0.65	0.85	0.82	0.09	0.15	0.22	0.06	2.94	2.91	2.35	2.06	12.04	12.02	10.05	9.81
Slc12a5	0.3	0.05	0.08	0.15	0.45	0.66	0.6	0.4	0.84	0.83	0.85	0.57	0.17	0.18	0.23	0.08	4.93	4.14	4.63	5.29	0.21	0.38	0.18	0.2	0.57	0.38	0.37	0.24
Slc12a7	12.78	3.65	8.12	7.66	2.34	2.53	2.78	1.43	62.69	61.05	62.7	61.52	4.04	4.36	5.25	4.87	3.8	3.85	3.25	4.41	4	3.32	4.37	2.96	6.61	6.19	6.18	6.54
Spata25	0.23	0.1	0.81	0.57	0.08	0.79	0.7	0.21	8.09	7.49	7.65	9.44	0.89	0.51	0.93	0.88	41.09	47.7	55.84	42.04	1.05	0.52	1.21	1.14	0.64	1.7	1.03	0.76
Jph2	3.16	1.18	3.16	2.29	1.88	1.39	1.6	0.47	4.22	4.4	4.48	4.08	1.88	1.83	2.7	2.33	0.95	1.06	0.97	1.21	12.99	15.74	9.83	13.58	71.6	71.13	79.78	52.26
Dhx58	1.53	0.7	0.94	0.9	1.09	1.66	2.11	0.78	1.08	0.69	1.75	0.97	1.13	1.71	1.54	1.1	19.7	19.18	18.17	22.87	1.89	1.99	7.45	1.74	1.69	1.38	1.62	1.49
Hspb9	5.48	2.31	5.2	6.45	13.55	15.14	13.04	12.48	3.67	1.18	12.6	2.33	2.79	5.35	1.26	2.18	476.77	500.27	559.46	456.74	32.49	24.04	17.26	34.49	1.3	0.37	0.09	2.07
Nkiras2	17.44	5.2	16.08	15.3	14.81	11.94	14.92	8.43	13.11	11.57	12.36	12.3	11.78	10.76	12.89	11.4	66.11	67.44	64.14	69.27	12.83	12.4	16.92	11.49	18.12	16.03	14.94	17.55
Sgk2	0	0	0	0	0.06	0.02	0.02	0.05	0.25	0.13	0.23	0.19	0	0.04	0.04	0	0.45	0.49	0.18	0.43	0	0	0.02	0.02	0.02	0	0.04	0.05
Gdap1l1	0.53	0.09	0.45	0.16	0.08	0.03	0.11	0.09	5.61	5.4	6.85	5.76	0.31	0.25	0.49	0.51	0.18	0.12	0.09	0.02	0.24	0.12	0.06	0.16	0.08	0.05	0.13	0
Hnf4a	0.22	0.21	0.04	0.01	0.01	0	0	0	72.88	67.21	72.13	61.88	2.97	3.16	3.74	1.99	0.1	0.06	0.06	0.07	0	0	0	0	0.03	0.05	0.01	0
Cyth4	2.38	0.9	2.2	2.32	5	4.88	5.48	2.73	6.25	6.56	6.23	4.36	4.54	4.12	4.2	3.44	0.53	0.46	0.53	0.53	8.24	6.55	33.82	6.12	5.56	4.64	4.16	4.41
Baiap2l2	0.08	0.13	0	0	0	0	0.07	0	19.73	23.82	21.25	20.91	0.61	0.48	0.72	0.33	0.12	0.32	0.33	0.23	0	0.13	0.07	0	0.19	0.06	0.14	0.16
Gdf9	0.13	0.09	0.16	0.11	0.43	0.42	0.15	0.12	0.38	0.18	0.25	0.11	0.12	0.19	0.03	0.18	6.76	7.2	6.74	6.92	0.36	0.36	0.35	0.22	0.32	0.04	0.24	0.34
Tbx5	0.03	0.04	0.03	0.02	0.16	0.14	0.24	0.17	0	0.02	0	0	0	0	0	0	2.16	1.69	1.4	1.92	0.07	0.04	0.01	0.03	0	0.03	0	0
Gpx3	702.76	253.15	402.9	519.2	5121.78	4938.35	4647.16	3574.02	1495.52	1638.54	1231.55	1500.26	90.94	94.21	103.6	96.69	2.74	2.92	3.01	2.26	5834.27	5233.97	2795.77	5212.18	468.99	501.41	506.62	561.41
Il12rb2	0.04	0.13	0.23	0.13	0.51	1.08	0.96	0.72	0.14	0.04	0.06	0.02	0.02	0.08	0.02	0	0	0.03	0.07	0	0.53	0.45	1.01	0.37	0.04	0.13	0.12	0.05
Kpna2	1.73	0.78	2.88	1.97	2.07	1.46	2.29	1.8	2.13	1.77	3.55	2	2.59	3.03	3.21	2.77	43.17	51.09	47.93	44.09	3.17	3.02	2.55	2.84	2.72	2.73	1.78	1.9
Myo1b	23.71	10.75	24.87	25.77	51.75	54.55	72.84	57.06	7.65	7.25	8.27	8.66	12.45	15.91	13.81	15.93	1.45	1.22	1.24	1.5	83.98	85.51	64.31	87.8	273.79	259.94	257.04	220.76
Akap1	16.73	7.15	12.45	14.11	36.04	32.76	38.13	22.59	35.54	34.4	38.55	34.05	10.31	9.76	9.26	8.8	145.35	152.68	126.19	161.38	37.62	36.75	22.26	34.82	18.26	18.1	18.06	18.61
Kcnab3	1.17	0.24	0.48	0.48	0.18	0.17	0.28	0.09	0.62	0.86	0.58	0.46	0.55	0.72	0.38	0.6	4.41	4.04	3.97	4.38	0.28	0.21	0.4	0.35	0.47	0.34	0.44	0.24
1700125H20Rik	0.37	0	0.24	0.27	0.4	0.52	0.06	0.23	0.07	0.21	1.52	0.34	0.14	0.12	0	0.33	18.36	22.22	26.21	19.77	0.55	0.3	0.16	0.35	0.26	0.21	0.19	0.16
Wnt9b	0.2	0.07	0.09	0.07	0.06	0.07	0.04	0.07	1.3	1.3	1.23	1.64	0.12	0.06	0.22	0.11	0.11	0.06	0.05	0.07	0.03	0.01	0.05	0.05	0.21	0.18	0.18	0.25
Trpv2	1.03	0.39	0.68	0.49	0.93	0.73	0.83	0.48	0.82	1.03	1.19	0.99	0.82	0.54	0.85	0.74	0.16	0.17	0.15	0.23	2.25	2.36	7.94	1.57	7.13	7.05	6.86	6.63
Cenpv	2.53	1.7	2.31	3.61	7.97	5.32	5.9	3.8	10.07	10.57	13.45	10.6	2.3	2.82	2.07	1.59	183.35	195.7	200.14	193.28	4.58	3.86	2.97	3.69	2.86	2.65	2.47	2.55
1700001P01Rik	0.29	0.37	0.19	0.21	0.21	0.9	0.53	0.53	0.88	0.85	1.33	0.42	1.12	0.46	0.2	0.3	48.62	64.52	75.83	49.26	0.19	1.22	0.42	0.81	0.6	0.32	1.09	0.36
Trim37	6.96	3.83	7.54	7.42	6.51	7.07	7.7	5.2	19.47	18.11	21.16	19.28	7.03	9.52	7.93	7.97	141.14	141.85	128.97	148.9	6.99	6.53	5.19	6.96	7.44	6.54	7.43	7.12
Ybx2	15.97	6.61	10.23	11.89	6.61	9.52	8.57	5.61	8.5	7.75	27.49	7.98	5.56	9.53	4.6	6.01	585.14	683.39	653.25	486.05	7.77	9.28	6.07	9.78	3.19	2.67	2.78	3.73
Elp5	14.98	3.57	10.54	9.4	17.78	14.3	17.82	11.17	18.15	16.42	20.02	15.45	12.08	10.69	14.82	12.35	96.59	98.25	86.89	102.91	14.84	13.17	15.39	14.18	15.89	13.76	12.89	14.77
Slc2a4	5.09	1.65	3.36	3.46	2.76	2.68	2.51	1.4	4.65	4.89	4.47	4.16	2.67	2.18	3.27	3.45	0.21	0.14	0.17	0.44	8.61	9.01	7.04	9.63	30.76	28.89	34.5	27.23
2810408A11Rik	3.82	1.72	2.43	3.46	11.37	9.92	11.21	8.5	1.85	2.23	3.45	3.05	2.36	2.26	1.98	1.91	81.17	80.94	83.04	76.08	9.15	8.59	7.61	9.32	5.9	5.37	5.89	6.45
Dnah11	0.75	0.55	0.8	0.95	2.25	2.83	2.32	1.99	46.21	41.66	47.9	39.53	2.49	3.16	3.04	2.03	0.32	0.32	0.34	0.29	2.37	2.09	2.26	2.92	0.1	0.06	0.07	0.06
Mmp20	0.05	0	0	0	0.04	0.04	0.07	0.12	0.02	0.02	0	0	0	0.02	0	0	0	0	0	0	0.11	0.23	0.14	0.1	0	0	0	0.02
Mmp7	8.06	3.86	7.5	9.01	2.41	3.57	4.41	2.22	529	490.73	509.81	627.61	45.13	54.31	46.11	47.95	0	0	0	0	194.48	202.85	67.44	158.1	1.47	1.81	1.28	3.87
Crhr1	0	0.06	0.02	0.05	0.05	0	0.11	0.02	0	0	0	0	0.03	0	0.02	0.03	0.42	0.31	0.51	0.36	0.05	0.02	0	0	0.26	0.33	0.25	0.27
Dusp14	2.23	1.02	2.59	1.8	4.13	4.17	4.19	3.27	26.07	24.7	26.14	22.01	5.52	6	4.74	5.47	0.56	0.39	0.66	0.6	1.35	0.82	1.45	1.46	2.32	2.34	2.21	2.29
Ikzf1	2.24	1.26	2.36	1.73	7.26	7.27	8.98	5.92	1.27	1.42	1.19	1.07	2.38	2.6	2.61	2.52	0.21	0.23	0.13	0.23	12.95	13.69	12.55	12.36	2.31	2.07	2.06	2.2
Slc25a39	62.14	16.39	49.84	50.68	57.27	47.92	52.15	31.4	72.95	75.53	76.24	73.15	48.37	45.34	52.88	52.3	286.76	291.11	291.14	276.82	54.81	55.79	47.64	50.64	50.94	46.59	47.4	48.31
Lhx1	0.34	0.1	0.38	0.18	0.03	0	0	0.04	10.93	10.26	10.41	9.43	0.55	0.36	0.62	0.35	0.45	0.68	0.42	0.32	0.03	0.02	0.04	0	0	0	0	0
Cpsf4l	4.1	0.94	2.91	2.01	5	5	4.75	2.97	0.2	0.19	0.7	0.14	1.68	1.75	1.29	1.84	15.44	16.39	20.28	16.47	9.59	6.6	5.92	7.46	0.91	0.34	0.36	0.38
Myh11	53.25	43.49	66.29	50.65	35.74	39.74	35.25	21.94	36.7	39.24	40.55	37.66	33.35	35.17	46.43	48.66	4.57	6	6.31	5.11	297.45	334.89	215.98	290.09	959.02	974.59	955.27	915.31
Fndc8	0.19	0.04	0.19	0.09	0.12	0.09	0.2	0.03	0.22	0.03	0.5	0	0.13	0.29	0.11	0.12	33.83	31.95	33.19	31.82	0.16	0.14	0.1	0.1	0.03	0	0	0.03
Otop3	0	0	0	0	0	0	0	0	0.11	0	0.08	0.08	0	0.02	0	0.03	0.07	0.13	0.09	0.46	0	0.02	0	0	0	0	0	0
Sult4a1	0.05	0	0.05	0	0	0.18	0.02	0.02	0.06	0	0.05	0	0	0.07	0	0.05	1.03	0.45	0.8	0.6	0.45	0.32	0.13	0.14	0	0.06	0.08	0.06
Slc22a5	16.58	3.31	8.21	8.57	86.99	82.27	99.9	63.67	35.79	32.02	35.98	32.88	4.94	5.8	5.5	5.64	10.01	9.89	10.65	10.99	71.08	62.76	49.76	72.07	18.62	19.04	18.54	18.44
P4ha2	11.37	3.42	10.64	9.18	2.12	2.51	2.52	1.44	13.76	13.85	14.2	14.66	93.81	74.43	81.85	59.56	3.01	2.76	3.36	3.3	3.3	3.39	5.69	3.72	18.22	19.51	21.07	18.33
Alox12e	1.2	0.25	1.01	0.56	0.64	0.93	0.73	0.36	0.45	0.33	0.26	0.32	3.67	3.89	2.42	1.49	0	0	0	0	0.39	1.02	0.52	0.53	3.32	2.84	2.49	2.79
Heatr9	0	0	0.15	0	0	0.2	0.15	0.09	0.04	0.04	0.17	0.1	0.11	0.18	0.03	0.03	16.09	17.26	19.57	14.72	0.09	0.16	0.14	0.15	0.1	0.11	0.1	0.04
Ccl6	2.8	1.22	1.73	3.07	10.4	8.98	13.69	9.47	7.31	10.97	6.49	11.53	1.6	2.1	1.53	2.46	0.11	0.11	0.08	0.21	12.85	10.25	51.86	15.33	12.65	13.66	8.1	13.19
Ccl4	0.18	0	0	0	0	0.09	0	0.25	0.62	0.3	0.1	0.2	0.11	0.09	0.37	0.1	0	0	0	0.09	0.27	0.18	1.92	0.17	0.1	0	0.38	0.11
Hoxb1	0.17	0.04	0.19	0.4	0	0	0	0	0.03	0	0	0	1.58	1.62	1.81	2.06	0	0.05	0	0	0	0	0	0	0	0	0	0
E2f2	0.2	0.1	0.24	0.15	0.19	0.29	0.2	0.05	0.35	0.22	0.43	0.33	0.27	0.29	0.39	0.11	0.51	0.36	0.61	0.45	1.87	1.68	1.79	1.82	1.32	1.37	1.51	1
Dnah1	0.87	0.22	0.53	0.36	0.16	0.32	0.28	0.15	18.62	17.23	18.68	17.85	1.45	1.57	1.37	0.98	37.12	32.04	32.43	40.27	0.33	0.35	0.41	0.42	0.32	0.28	0.24	0.26
Slc25a22	14.44	3.97	7.17	8.13	17.71	15.73	18.16	10.67	5.25	5.49	4.78	4.55	1.96	1.55	1.98	1.8	0.62	0.54	0.62	0.55	5.6	5.49	3.75	4.54	9.67	9.81	9.8	5.4
Aldh3a1	6.01	2.47	4.33	4.3	22.91	22.83	16.46	13.1	0.08	0.04	0.15	0.15	0	0.23	0	0.11	1.89	1.78	0.88	1.27	0.34	0.37	0.18	0.23	0.94	1.81	1.83	2.82
Scrn1	1.02	0.59	0.93	0.93	0.6	0.64	1.21	0.64	17.6	16.73	14.84	16.3	1.15	1.24	1.4	0.64	3.57	3.33	3.42	3.29	1.49	0.86	2.1	0.94	2.43	2.16	1.82	2.44
Styxl1	1.8	1.02	1.58	0.78	1.13	1.4	2.08	1.14	13.87	12.89	15.11	13.13	1.53	2.01	1.74	1.91	30.93	35.27	31.47	31.3	1.18	1.03	1.35	1.39	0.72	0.24	0.45	0.55
Chtf18	0.89	0.24	0.5	0.54	0.29	0.41	0.44	0.17	0.82	1.18	1.19	1.11	0.48	0.61	0.51	0.43	4.49	5.9	4.71	5.47	0.43	0.6	0.83	0.57	0.87	0.7	0.55	0.53
Etnppl	0	0	0	0	0	0	0	0.05	0	0	0.01	0	0	0	0	0	0	0	0.01	0	0.07	0.03	0.04	0.08	0	0	0.04	0
Nop9	7.25	1.88	5.62	5.37	5.26	5.11	6.06	3.36	7.55	6.87	8.45	7.12	4.24	5.66	5.44	5.49	50.68	47.93	51.36	53.82	6.31	5.58	5.55	5.37	8.52	8.13	8.63	6.57
Psmc3ip	0.74	0.47	1.35	1.04	1	1.4	1.2	1.28	3.6	3.33	3.96	4.39	1.25	1.24	1.32	0.73	24.98	26.42	31.55	26.79	1.1	0.54	0.66	1.43	0.92	0.62	0.77	0.64
Noxo1	1.7	0.37	1.22	1.06	0.89	0.45	0.77	0.54	8.03	9.48	8.2	8.5	1.16	0.77	1.31	0.25	11.12	10.66	9.78	9.75	0.74	1.36	1.18	0.8	1.46	1.37	0.86	0.97
Sec14l4	1.65	1.15	1.76	1.19	0.34	0.29	0.21	0.14	31.25	28.83	30.47	23.97	2.07	3.58	2.75	3.36	0.56	0.28	0.49	0.49	0.55	0.33	0.2	0.47	0.1	0.16	0.15	0.07
Rab4a	8.03	6.07	9.2	11.76	7.84	8.41	7.73	5.49	38.64	39.51	38.46	38.18	8.63	8.58	10.75	9.18	3.23	3.32	3.26	4.04	7.08	8.42	5.22	6.32	7.04	6.3	9.01	6.61
Slc6a8	4.64	1.6	3.62	3.01	3.16	2.71	2.68	1.64	73.07	75.52	73.45	76.81	6.3	6.76	6.97	6.4	1.06	0.8	1.61	0.92	8.11	8.36	25.55	7.97	20.58	18.53	21.88	16.93
Pdk4	0.43	0.31	0.82	0.7	0.68	0.65	1.06	0.71	3.75	3.87	3.82	4.54	0.88	0.8	0.79	0.53	0.63	0.66	1	0.92	2.12	2.08	1.59	1.41	7.55	7.85	8.32	9.7
Ubxn6	26.16	9.24	19.97	18.96	23.23	20.07	21.42	13.66	25.06	24.42	26.21	19.43	15.88	16.7	16.19	18.28	112.73	119.12	123.93	118.12	23.27	19.44	16.17	19.78	16.19	15.37	16.92	15.75
Calr3	1.64	1.03	2.03	1.7	1.2	1.38	1.6	0.78	2.78	2.99	2.86	3.28	1.11	1.39	0.93	1.32	50.61	46.93	41.37	51.33	2.51	2.25	1.7	2.63	2.98	2.94	2.46	3.74
Iyd	0.15	0.24	0.07	0	0.24	0.59	0.28	0.28	75.6	71.81	74.39	71.34	2.53	2.86	3.25	1.96	0.03	0.03	0.07	0.07	0.04	0.07	0.03	0.21	0.08	0.08	0	0
Ccdc170	0.16	0.07	0.12	0.08	0.25	0.37	0.71	0.26	28.59	27.06	30.36	28.63	1.48	2	2.02	0.92	1.89	1.8	2.36	1.71	0.26	0.28	0.52	0.33	0.37	0.44	0.44	0.25
Esr1	16.26	8.11	16	15.37	5.73	6.07	6.91	4.79	150.02	136.23	153.32	155.04	12.86	14.61	15.24	12.36	1.81	2.12	2.19	2.02	13.8	12.65	12.56	11.75	13.79	13.64	16.45	18.4
Vip	0.14	0.06	0.34	0.43	0	0	0.07	0	0	0	0.03	0	5.61	5.01	2.53	3.22	0	0	0	0	0	0	0	0	0	0.05	0	0
Hey2	1.26	0.96	1.57	1.43	0.1	0.22	0.35	0.06	0.32	0.34	0.28	0.36	3.98	4.06	4.24	5.16	0.43	0.42	0.3	0.32	0.46	0.28	0.46	0.26	0.54	0.63	0.19	0.41
Cep57l1	4.79	3.11	4.81	6.06	1.57	1.83	2.43	2.4	3.79	4.02	4.68	4.1	2.33	2.71	2.11	3.53	29.81	26.78	29.24	27.03	1.99	2.34	2.49	2.04	2.7	2.78	2.94	2.26
Rab32	1.52	0.75	1.24	1.73	1.35	1.42	2.5	1.39	11.77	9.81	10.09	11.94	1.79	2.23	1.93	1.62	0.2	0.24	0.25	0.25	2.7	2.32	8.19	2.42	3.65	3.72	2.54	4.05
Slc22a16	0.31	0.27	0.26	0.45	0.37	0.41	0.63	0.49	0.57	0.23	1.69	0.14	0.22	0.68	0.27	0.28	87.82	89.82	92.32	94.19	0.78	0.67	0.33	0.62	0.06	0.06	0.03	0.2
Slc16a10	133.79	52.49	103.51	126.53	1.29	1.35	1.59	1.17	21.74	21.14	24.07	23.88	1.8	3.56	2.88	8.91	0.91	0.56	1.12	0.6	3.49	3.51	6.82	3.19	2.12	2.37	2.45	2.45
Lama4	4.48	1.85	5.48	4.2	6.84	7.19	10.84	5.91	10.29	11.69	12.3	10.81	3.1	3.7	5.29	4.31	1.07	1	1.25	1.43	16.44	17.86	19.1	15.57	33.05	32.96	34.92	33.53
Popdc3	0.06	0.04	0.09	0.21	6.11	4.68	5.35	5.04	0	0	0	0	0	0	0	0	0.12	0.03	0.06	0	4.12	3.6	1.26	4.2	0.07	0.11	0.07	0.16
Gopc	11.18	7.59	20.88	14.08	4.64	5.56	6.02	4.85	6.53	5.91	6.36	7.16	72.65	79.02	72.92	63.76	7.02	6.11	5.63	7.21	6.14	6.01	6.23	6.31	12.48	11.72	11.78	12.14
Pkib	1.26	0.66	1.07	1.97	0.54	0.63	0.82	0.42	0.12	0.19	0.48	0.23	0.18	0.23	0.13	0.26	22.92	24.07	23.33	20.65	0.49	0.3	1.8	0.63	3.74	2.97	2.56	2.77
Nts	0	0.06	0	0	0	0	0.09	0	0.05	0.11	0.46	0.31	0	0.05	0.2	0	0.04	0	0	0	0	0	0.13	0	0	0	0	0
Ros1	60.67	29.34	64.65	65.89	1.34	1.15	1.54	0.97	0.37	0.4	0.49	0.28	124.82	130.09	127.48	104.27	0.14	0.22	0.26	0.21	0.54	0.58	0.6	0.61	2.2	2.4	2.32	2.75
Slc6a15	3.42	0.93	2.85	2.33	0.04	0.03	0.03	0	0.4	0.57	0.37	0.34	0.08	0.35	0.1	0.77	0	0.01	0.02	0.03	0.13	0.08	0.06	0.09	0.24	0.26	0.38	0.4
Lin7a	3.39	2.49	3.95	2.47	0.24	0.58	0.61	0.42	0.75	0.36	1.06	0.69	0.59	0.82	0.52	1.66	35.26	33.29	30.49	31.2	1.08	1.12	1.16	1.28	0.88	0.56	0.66	0.83
Ppp1r12a	34.82	23.41	49.96	46	29.85	33.2	34.82	29.65	28.62	26.78	30.7	28.06	28.2	31.93	31.57	31.9	16.18	14.91	14.5	17.97	46.87	53.62	43.57	49.32	235.41	260.75	252.38	245.05
Sept10	3.87	2.35	5.94	5.32	4.52	4.27	5.38	3.84	7.37	7.57	8.29	7.07	4.67	5.37	6.44	4.42	42.67	46.32	43.38	47.02	7.22	6.99	6.31	6.42	7.14	7.17	7.94	6.17
Lims1	9.97	3.97	12.26	10.72	8.13	7.17	10.44	7.93	9.97	9.46	10.72	10.88	13.48	14.59	14.26	11.34	6.39	5.93	6.83	6.76	12.65	12.29	18.68	12.65	47.39	49.82	51	53.12
Slc17a8	0.07	0.02	0.04	0.06	0.04	0.08	0.1	0.02	0.15	0.03	0.23	0.09	0.03	0.06	0.08	0.07	0.31	0.23	0.24	0.27	0.19	0.14	0.26	0.08	1.03	1.18	1.04	0.57
Epyc	0.21	0.03	0.32	0.18	0.23	0.22	0.48	0.11	4.04	4.11	4.66	4.26	0.28	0.32	0.38	0.2	9.3	9.66	9.69	9.9	0.02	0.12	0.17	0.18	0.15	0.29	0.1	0.27
Cdk1	0.27	0.05	0.28	0.28	0.32	0.27	0.42	0.25	0.67	0.66	0.56	0.54	0.38	0.34	0.66	0.38	6.6	6.18	6.55	6.95	0.65	0.68	1.18	0.59	0.75	0.58	0.65	0.77
Cabcoco1	3.48	2.42	2.81	4.93	4.08	5	3.82	3.46	20.75	22.32	23.93	21.83	2.11	2.76	2.71	1.45	97.67	103.33	95.45	103.34	7.54	8.12	4.53	8.21	4.08	4.33	3.64	3.63
Poc1b	2.63	1.44	2.68	2.7	2.44	3.48	2.55	1.92	5.73	5.92	6.21	6.21	3.67	4.31	4.34	3.74	28.08	26.14	28.67	27.68	3.02	2.9	4.14	3.05	4.5	4.43	4.48	4.57
Dusp6	12.14	3.76	19.12	10.88	7.36	6.19	7.17	4.98	14.87	14.64	13.98	10.83	98.19	96.34	125.51	90.69	3.2	2.09	2.03	2.94	7.7	7.67	8.83	5.71	26.03	23.16	25.23	15.68
Sgk1	5.71	2	4.8	3.69	47.47	41.73	44.42	35.68	8.81	7.79	8.55	7.76	5.36	6.42	6.88	5.23	1.99	1.51	1.35	1.57	52.59	53.37	62.25	45.38	22.86	17.3	18.54	13.36
Myb	0.56	0.19	0.31	0.26	5.05	5.51	6.51	5.17	24.4	22.02	22.92	24.24	1.71	1.35	1.83	1.15	0.22	0.17	0.12	0.11	6.18	5.11	4.95	5.66	0.37	0.58	0.39	0.45
Ahi1	4.43	2.11	4.61	5.04	3.54	3.98	4.5	3.65	7.53	7.48	8.61	6.94	3.81	4.12	2.99	3.86	55.76	49.97	50.53	54.69	3.86	3.43	3.11	4.09	3.77	3.38	3.48	3.93
Enpp3	0.31	0.23	0.3	0.44	0.39	0.29	0.68	0.48	7.7	7.77	8.74	10.03	0.35	0.67	0.89	0.74	0.15	0.16	0.24	0.29	0.74	0.73	1.13	0.7	1	0.69	0.47	1.31
Mtfr2	0.33	0.23	0.38	0.29	0.03	0.13	0.17	0.03	0.21	0.37	0.51	0.26	0.32	0.49	0.86	0.54	8	7.38	8.72	9.83	0.33	0.12	0.69	0.25	0.41	0.87	0.59	0.87
Il20ra	0.06	0.04	0.08	0.09	0.09	0.15	0.11	0.05	0	0.13	0.06	0.06	0.1	0.05	0	0.03	0.91	0.97	0.59	0.65	0.17	0.08	0.03	0.08	0.06	0.03	0.12	0.07
Hal	4.53	2.29	3.27	6.05	0.06	0.16	0.06	0.16	0.17	0.16	0.1	0.06	0.03	0.02	0.01	0.02	0.14	0.38	0.11	0.28	0.04	0.02	0.16	0.01	0.09	0.1	0.03	0.11
Usp44	0.32	0.18	0.39	0.41	0.28	0.61	0.73	0.47	0.26	0.13	1.28	0.31	0.21	0.64	0.15	0.32	88.38	90.41	87.76	88.64	0.9	0.91	0.72	0.78	0.02	0	0	0.05
Nudt4	20.27	7.77	24.37	19.37	7.49	6.95	8.95	5.88	66.17	63.52	74.42	70.55	77.29	84.93	81.64	73.6	248.72	247.94	244.35	263.47	18.34	20.6	17.35	19.77	87.81	95.25	91.71	85.61
Pah	0	0	0	0	0.12	0.35	0.18	0.15	0.1	0.06	0.06	0.09	0	0	0	0	0.03	0.02	0.05	0.03	0.22	0.08	0.02	0.05	0.03	0.03	0	0.04
Ascl1	0	0.06	0.02	0.05	0.1	0.05	0.33	0.2	0.14	0.03	0.03	0.03	0	0	0	0	0	0	0.02	0	0.02	0.07	0	0.02	0.25	0.67	0.48	0.42
Igf1	2.95	2.37	5.98	4.85	8.51	9.44	14.8	10.8	42.17	35.05	43.87	39.53	3.24	3.97	5.42	3.46	1.84	1.71	1.95	1.8	7.99	10.25	23.02	10.19	16.48	15.4	16.14	9.99
Dram1	0.36	0.22	0.58	0.5	1.37	0.91	1.99	1.32	3.85	3.09	3.17	3.71	1	1.28	1.04	0.99	9.35	10.47	12.47	11.98	1.66	1.96	5.2	1.24	1.79	2.21	1.61	1.79
Mybpc1	0.56	0.19	0.43	0.41	1.23	1.53	1	0.93	0.1	0.1	0.11	0.02	0	0.01	0.03	0.18	0.5	0.43	0.29	0.59	8.79	8.17	6.58	7.18	41.34	46.05	40.63	32.26
Slc5a8	0.06	0.01	0.01	0.01	0.02	0	0.04	0	0.96	0.99	1.19	1.32	0.16	0.1	0.13	0.08	0.03	0	0.03	0.01	0.31	0.55	0.31	0.57	1.54	1.03	1.58	1.08
Herc4	8.55	3.43	9.34	10.29	7.47	6.69	9.53	7.35	12.02	11.37	14.53	12.34	9.58	10.37	10.14	10.37	56.42	58.82	66.4	60.46	10.62	10.53	15.38	10.73	17.44	17.3	17.2	17.23
Mypn	0.12	0.01	0.11	0.05	0.01	0.06	0.04	0.03	0.05	0.08	0.1	0.05	0.03	0.04	0.02	0.02	1.66	1.84	1.68	1.93	0.19	0.19	0.11	0.1	0.42	0.15	0.22	0.34
Srgn	22.34	17.27	20.33	22.21	90.06	91.27	83.03	89.67	4.63	4.02	4.26	6.22	5.14	6.65	6.5	7.83	6.22	7.95	8.58	5.85	11.3	10	18.92	10.32	8.4	8.07	8.05	9.09
Vps26a	13.83	14.99	24.87	28.77	11.57	13.08	13.27	13.93	16.31	16.02	18.26	19.18	18.63	23.51	17.8	23.38	124.25	132.43	133.97	132.25	11.84	12.37	19.56	14.36	22.2	21.47	21.05	22.4
Hkdc1	0.02	0.07	0.03	0	0.02	0	0.06	0.02	1.4	2.35	2.02	1.52	0	0.05	0	0.02	0.06	0.03	0.05	0.08	0	0.07	0	0	0.07	0.06	0.05	0.13
Npffr1	0.07	0.02	0	0.02	0	0	0.02	0.02	4.13	3.48	3.29	2.77	0.16	0.16	0.02	0.18	0.28	0.19	0.19	0.37	0.02	0.02	0.02	0	0	0	0	0
Tbata	0.43	0.51	0.35	0.21	0.3	0.5	0.51	0.48	9.44	10.62	12.57	11.85	0.84	1.56	1.42	0.88	111.84	109.51	113.97	92.76	0.79	0.54	0.42	0.6	0.04	0.04	0	0.15
Pcbd1	35.14	4.54	22	24.31	8.07	5.54	8.21	2.52	39.34	37.29	39	34.41	26.25	32.23	29.86	30.69	0.07	0.06	0.14	0.15	2.47	2.15	3.82	2.27	85.47	77.27	86.28	87.08
Slc16a7	0.3	0.17	0.45	0.41	0.36	0.44	0.54	0.56	0.67	0.69	1.53	0.82	0.4	0.63	0.52	0.53	48.23	47.94	54.72	48.59	0.88	0.92	1.62	0.88	2.51	2.61	2.4	2.56
Usp15	4.8	3.23	6.58	6.69	4.74	5.05	5.92	4.84	5.83	5.5	6.93	6.66	7.99	9.09	8.31	7.89	32.18	32.82	36.19	32.18	5	5.02	6.42	4.86	9.22	9.72	8.89	9.18
Pcsk4	1.97	0.47	0.69	1.18	0.63	0.52	0.76	0.62	2	2.19	4.08	2.14	0.76	1.05	0.77	0.89	53.44	57.04	68.3	59.31	0.53	1.08	0.38	0.75	0.77	0.96	1.1	0.95
Lgr5	0.09	0.02	0.04	0.07	0.16	0.07	0.08	0.03	0.37	0.23	0.24	0.43	0.06	0.06	0.06	0.05	0.03	0.01	0.12	0.11	0.25	0.28	0.17	0.32	9.37	9.32	10.05	10.68
Gamt	180.19	49.72	117.96	127.08	132.04	83.94	108.94	70.55	7.33	9.3	7.58	7.45	22.8	22.38	26.13	29.88	9.5	11.77	13.94	12.39	27.65	20.93	22.48	21.32	8.26	8.24	11.05	9.73
Ptprr	0.1	0.02	0.05	0.07	0.14	0.12	0.2	0.17	0.13	0	0.09	0.05	0.21	0.25	0.27	0.1	0.51	0.44	0.63	0.59	0.03	0.15	0.1	0.06	0.05	0.06	0.07	0.19
Kcnmb1	0.38	0.31	0.39	0.34	0.23	0.24	0.13	0.29	12.36	10.48	11.34	11.25	1.02	0.8	0.92	1.01	0.13	0.21	0.05	0.14	1.23	1.48	0.77	1.19	6.53	6.17	6.51	6.92
Mum1	6.72	1.68	4.96	4.27	5.18	4.6	5.06	3.05	5.95	5.79	6.85	4.99	13.61	12.51	13.83	9.52	50.07	55.19	45.27	58.95	4.45	4.18	3.96	4.21	4.68	4.86	4.88	3.63
Gabrp	0.05	0	0	0.02	0.31	0.51	0.56	0.17	0.02	0	0.08	0	0	0.03	0	0	0.03	0.08	0.03	0	14.26	10.41	9.9	12.37	0.46	0.37	0.53	0.57
Best3	1.55	0.42	1.34	1.58	0.02	0.11	0.1	0.06	0.05	0.05	0.05	0.02	0.51	0.27	0.11	0.14	0.6	0.26	0.58	0.67	0.07	0.09	0.06	0.02	0.14	0.02	0.14	0.08
Rab36	2.09	0.86	1.36	1.27	0.94	0.93	1.3	0.49	29.1	27.64	27.95	27.09	1.59	1.98	2.04	1.27	9.05	8.86	8.93	9.61	2.14	2.22	2.14	1.97	2.63	3.55	3.47	2.74
Nav3	1.61	0.59	2.55	1.3	0.77	1	0.81	0.74	0.69	0.55	0.46	0.52	20.17	18.3	18.09	14.37	0.24	0.26	0.28	0.21	6.78	7.21	4.6	7.19	0.6	0.48	0.71	0.57
Ddc	1.62	0.68	1.75	1.72	0.25	0.09	0.08	0.25	29.68	27.49	34.27	29.59	2.29	2.61	2.66	1.75	0.14	0.25	0.19	0.18	0.15	0.26	0.13	0.19	0.22	0.3	0.43	0.37
Cpm	5.88	2.23	5.74	5.62	7.48	8.63	8.81	7.38	2.32	1.95	1.69	2.29	1.27	1.65	1.36	1.45	0.14	0.21	0.19	0.25	23.89	23.28	14.31	25.76	7.57	5.24	4.75	5.32
Csrp2	4.16	2.92	6.33	5.47	11.66	9.84	11.44	7.22	56.31	59.57	52.32	51.8	8.14	7.51	9	5.66	6.78	4.55	4.64	6.28	10.81	11.09	11.62	9.88	8.08	8.63	7.58	8.36
Spata48	0.75	0.64	1.06	1.53	0.27	1.22	1.24	0.42	1.05	0.51	1.39	0.87	1.13	1.6	1.58	1.5	43.04	47.42	48.21	40.51	0.91	0.41	0.89	0.78	0.26	0.14	0.26	0.16
Zpbp	1.13	0.47	1.35	1.21	0.82	0.94	0.95	1.16	0.71	0.68	1.48	0.58	1.35	1.36	0.83	1.24	49.21	53	60.07	54.04	1.14	1.28	1.2	1.56	0.35	0.57	0.45	0.53
Phlda1	28.36	9	33.71	27.42	6.3	6.41	6.48	3.77	4.98	5.46	6.17	6.38	88.31	87.25	111.63	86.35	0.06	0.32	0.25	0.15	7.4	8.17	5.78	7.96	12.37	10.81	10.98	11.17
Mdm1	3.8	1.94	3.8	3.01	1.95	1.97	1.98	1.42	9.94	9.05	11.55	9.66	2.16	3.36	2.8	2.96	30.32	36.62	40.65	33.06	2.35	3.05	2.41	2.24	2.43	2.5	1.7	2.15
Wif1	0.16	0.03	0.1	0.03	0	0	0	0.02	0.48	0.78	1.73	0.94	0	0	0.13	0	0.1	0.09	0.09	0.13	1.03	1.12	0.6	0.88	12.18	15.21	10.22	8.8
Irak3	1.48	1.16	1.99	1.39	2.55	2.32	3.15	2.09	4.72	4.89	4.36	4.67	2.06	2.38	1.52	1.65	23.75	21.8	20.47	23.15	3.36	3.2	5.57	2.97	1.97	2.3	1.66	2.64
4930404N11Rik	1.11	1.03	2.3	2.21	0.92	0.51	1.82	0.46	3.89	3.17	3.5	2.44	0.89	0.6	0.87	0.57	35.48	39.36	50.21	34.05	1.15	1.18	0.95	1.17	0.85	0.9	1.58	0.56
Hcfc2	5.48	2.32	6.28	5.92	5.6	5.73	6.94	5.67	6.87	5.95	7.85	6.24	7.14	7.75	7.95	5.71	48.57	47.67	49.71	50.77	6	5.85	7	5.5	9.8	9.36	8.98	8.71
Glyctk	1.58	0.56	1.23	1.07	0.76	0.92	0.74	0.56	21.1	20.75	19.71	17.65	1.26	1.49	1.49	1.08	5.51	5.67	5.65	6.98	0.45	0.77	0.9	0.59	1.33	0.87	0.91	0.84
Slc36a2	0.17	0.03	0.12	0.03	0.29	0.62	0.66	0.25	1.77	2.72	1.79	2.84	0	0.05	0.08	0.03	0.11	0.04	0.13	0.12	0.22	0.19	0.91	0.07	0.88	2.14	0.97	0.53
Lyrm7	1.14	0.67	1.75	1.26	1.05	1.1	1.18	1.11	1.75	1.99	1.61	1.96	1.08	0.93	0.97	1.01	14.75	15.89	17.44	13.24	1.19	1.35	0.93	1.03	1.29	1.09	0.86	0.85
Smim23	0.1	0	0.09	0.1	0.21	0.6	0.27	0.53	0.11	0	0.41	0.11	0.11	0.46	0	0.2	56.15	47.83	44.88	44.53	0.86	0.57	0.17	0.9	0	0	0	0.12
Stk10	2.35	1.05	1.37	1.51	1.23	1.5	1.32	0.88	2.18	2.3	2.46	1.66	1.92	1.26	1.77	1.3	12.56	12.17	11.64	14.39	2.38	1.83	4.72	1.46	3.45	3.17	3.05	2.99
1700093K21Rik	0.18	0.17	0.26	0.29	0.63	0.8	0.55	0.96	0.52	0.6	1.36	0.64	0.64	0.91	0.65	0.38	95.77	93.82	97.6	81.91	0.76	0.58	0.56	0.55	0.76	0.3	0.33	0.68
Nsg2	0.05	0	0	0.06	0.03	0.03	0.02	0	0.03	0.15	0.09	0.15	0	0	0	0	0.02	0.02	0.02	0.03	0.24	0.6	0.52	0.33	4.35	4.41	2.58	6.44
Stc2	9.59	5.21	8.21	10.5	1.61	1.93	2	1.08	5.8	5.21	5.11	6.33	2	2.3	3.88	1.4	0.19	0.23	0.25	0.18	1.51	1.46	1.43	1.36	2.6	2.55	2.85	2.96
Cdc34	22.32	8.98	20.63	20.68	34.84	25.26	27.29	15.79	14.47	15.51	16.27	14.2	20.39	19	19.62	20.77	118.52	134.08	112.69	128.98	23.68	22.58	17.84	20.09	19.44	15.91	16.67	17.73
Prss57	0.1	0.51	0.45	0.34	0	0	0	0.02	0.17	0.12	0.05	0.14	0.1	0.04	0.02	0.04	0	0	0.02	0.02	0	0.08	0	0	0.07	0.02	0	0
Hmmr	0.15	0.1	0.31	0.18	0.35	0.21	0.26	0.2	0.28	0.19	0.38	0.28	0.52	0.75	0.88	0.5	5.85	5.29	4.63	6.26	0.29	0.35	0.77	0.3	0.42	0.31	0.45	0.48
Acsl6	0.18	0.14	0.35	0.33	0.04	0.17	0.16	0.13	0.26	0.17	0.94	0.2	1.31	1.19	1.24	0.95	17.03	16.32	16.83	17.53	0.24	0.18	0.13	0.27	0.16	0.25	0.31	0.4
Slc22a4	0.05	0.13	0.36	0.14	0.37	0.58	0.66	0.39	7.04	6.37	6.05	5.52	0.37	0.35	0.35	0.28	0.41	0.18	0.26	0.29	0.73	0.44	2.27	0.64	1.03	1	0.63	0.93
Flt4	0.82	0.4	0.74	0.74	1.06	1.04	1.58	0.65	10.46	11.32	14.06	10.61	2.43	1.95	2.61	1.43	1.67	1.81	1.44	1.5	1.08	1.05	1.72	0.82	3.3	3.4	3.36	2.65
Rasgef1c	0.05	0.02	0.09	0	0.17	0.15	0.03	0.08	0.04	0.02	0.09	0.06	0.04	0.02	0.04	0.09	0.26	0.24	0.24	0.19	0.42	0.73	0.16	0.4	1.08	1.32	1.43	1.29
Rufy1	11.28	5.05	10.04	10.55	59.7	61.91	66.04	52	15.82	15.18	13.8	16.08	8.17	7.87	7.33	7.5	2.56	2.52	2.49	2.68	22.22	20.87	20.62	23.24	10.89	11.84	9.9	10.34
Pdlim4	9.19	3.45	12.67	6.18	5.63	4.56	4.2	2.78	5.34	5.21	5.65	5.04	48.92	51.55	57.47	48.18	1.08	1.61	2.31	1.68	13.25	13.77	15.17	12.39	30.62	25.66	31.25	23.9
Cdkl3	4.35	3.5	5.72	6.09	2.23	3.36	3.52	2.93	8.17	7.11	10.42	9.19	5.73	5.8	4.63	5.18	117.42	114.48	116.54	107.27	3.65	4.17	3.23	4.55	3.81	3.61	4.3	3.82
Fam71b	0.24	0.45	0.11	0.35	0.5	0.31	0.56	0.4	0.09	0.12	0.29	0.06	0.29	0.55	0.11	0.23	67	62.61	58.77	42.61	0.27	0.46	0.15	0.33	0.03	0	0	0.03
Hormad2	0.06	0.08	0.15	0.16	0.52	0.76	0.84	0.62	0.1	0.07	0.32	0.03	0.04	0.15	0.09	0	14.3	15.69	18.5	15.37	1.89	1.1	0.78	1.48	0.7	0.44	0.5	0.8
Igfbp1	0.04	0.1	0.11	0	0	0	0.07	0	11.75	8.76	10.19	12.04	0.87	1.01	0.68	0.12	0	0	0.07	0	0	0	0	0	0	0	0	0
Adcy1	0.17	0.04	0.07	0.09	0.07	0.12	0.1	0.01	3.65	3.46	3.52	3.45	0.2	0.17	0.29	0.05	0.66	0.7	0.47	0.75	0.27	0.18	0.21	0.2	2.34	2.33	2.21	1.73
Tcn2	13.06	7.11	16.92	9.97	15.57	13.15	14.18	9.1	63.31	65.79	59.71	68.78	47.6	47.7	54.56	45.97	5.79	7.28	7.95	7.5	17.85	16.01	29.2	17.3	214.39	206.94	232.45	229.45
4921536K21Rik	1.95	0.53	1.34	0.89	2.31	2.48	3.14	1.71	4.62	4.59	4.77	4.83	1.05	1.72	0.99	1.29	43.27	41.23	35.26	44.46	1.53	1.72	1	1.3	1.55	1.7	0.98	1.28
Osbp2	5.32	2.35	4.36	5.04	11.05	10.55	9.92	7.23	2.75	1.81	5.81	1.99	5.02	4.35	3.83	4.63	139.82	153.58	147.9	150.4	19.96	17.74	13.85	18.94	4.44	2.26	2.94	5.44
Myo1g	0.41	0.21	0.37	0.47	0.95	0.96	1.64	0.49	1.88	1.78	1.87	1.19	0.54	0.54	0.48	0.32	0.11	0.13	0.15	0.12	1.88	1.29	12.18	1.43	1.63	1.85	1.49	1.53
Smtn	13.95	7.48	13.28	10.88	6.89	9.35	9.96	4.62	47.29	49.58	45.59	39.52	10.52	9.89	15.32	12.94	2.59	2.48	2.62	2.79	36.81	40.08	31.16	35.17	144.12	143.62	164	147.69
Npc1l1	1.62	0.19	0.94	0.89	3.24	4.29	4.36	2.18	0.11	0.04	0.06	0.09	0.03	0	0.07	0.06	0.09	0.16	0.17	0.17	0.28	0.26	0.31	0.55	0.55	0.78	0.83	0.77
Clhc1	0.57	0.49	1	0.73	0.41	0.57	0.58	0.65	0.28	0.36	0.38	0.47	0.57	0.83	0.5	0.8	17.48	15.88	15.15	18.57	0.83	0.53	0.84	0.71	0.63	0.42	0.39	0.51
Cfap36	11.42	12.19	17.86	16.66	11.13	12.53	14.97	12.65	19.93	23.32	23.72	21.8	16.69	22.08	17.46	17.86	169.23	166.99	157.57	153.05	10.69	12.67	11.12	12.49	11.55	11.22	10.18	10.29
Zkscan17	9	2.38	7.38	7.09	5.38	5.84	7.11	3.52	15.96	15.81	16.25	15.35	9.38	9.91	10.08	9.75	52.32	50.45	49.05	54.32	7.91	7.61	8.46	7.43	9.44	8.65	10.35	9.85
Pgam2	4.1	2.36	3.18	5.27	4.44	7.51	6.46	4.73	3.66	2.68	18.2	2.02	3.25	4.56	2.03	2.78	575.75	602.8	533.71	579.64	9.01	7.88	5.29	8.6	1.2	0.87	0.07	0.72
Ankrd36	0.36	0.14	0.39	0.26	0.62	0.96	1.11	1	0.46	0.28	2.58	0.36	0.64	1.01	0.33	0.32	111.93	110.39	102.57	113.79	1.36	1.06	0.72	1.57	0.04	0.03	0.03	0.12
Ccdc117	4.77	1.88	3.53	3.39	7.21	5.91	8.06	5.47	6.16	5.31	5.84	5.95	4.09	4.78	4.31	3.22	30.1	28.71	31.25	32.91	6.01	5.12	6.6	5.28	8.19	8.33	8.85	8.73
Sept4	4.06	1.89	3.91	4.42	4.97	6.9	5.86	3.88	4.74	5.42	4.79	4.45	4.26	4.52	5.49	3.55	34.1	31.08	35.18	32.05	2.13	1.97	3.07	2.44	0.47	0.69	0.81	0.95
Prr11	0.45	0.12	0.35	0.4	0.34	0.36	0.35	0.36	0.63	0.57	0.7	0.56	0.55	0.64	0.67	0.31	5.01	4.45	4.41	4.7	0.46	0.46	0.8	0.54	0.71	0.63	0.52	0.65
Gria1	0.49	0.22	0.57	0.29	0.15	0.15	0.09	0.05	20.11	17.97	21.54	13.22	0.85	1.17	0.99	0.64	0.29	0.3	0.3	0.42	0.18	0.27	0.11	0.14	2.83	3.68	3.11	2.57
Ppm1d	6.47	3.21	7.45	7.15	5.54	6.14	8.04	4.9	10.12	9.21	12.05	9.48	7.7	9.46	7.45	8.07	116.75	118.27	134.25	106.49	7.06	7.84	6.28	7.3	5.83	6.81	6.1	6.84
Znhit3	4.34	1.99	2.62	3.73	5.35	4.13	6.16	3.98	3.56	3.91	4.42	5.48	3.72	3.38	3.06	3.04	24.77	22.58	23.9	26.24	3.73	4.17	4.35	3.99	2.83	2.74	4.79	3.39
Shmt1	3.88	1.81	4.33	4.02	0.7	0.76	1.1	0.35	1.53	1.64	2.33	1.48	4.92	5.08	5.74	4.05	13.08	11.79	12.67	11.67	0.68	0.55	1.05	0.59	1.49	1.42	1.15	1.73
Myocd	3.41	2.01	4.4	3	1.28	2.05	1.72	1.13	3.1	2.99	2.9	2.75	2.04	1.93	2.34	2.19	0.35	0.3	0.27	0.51	7.65	8.52	6.08	7.18	39.15	42.07	40.59	33.83
1700086D15Rik	0.65	0.35	0.96	1.23	1.24	0.57	1.22	0.51	1.94	2.06	2.11	2.5	0.32	0.84	0.84	0.75	4.9	5.16	6.43	4.55	1.41	1.13	0.87	0.87	1.21	1.65	1.14	1.99
Pctp	48.98	22.47	41.93	51.08	10.51	11.51	12.65	7.32	7.06	6.17	5.83	7.51	11.61	12.07	14.48	11.79	6.63	6.21	6.06	5.73	4.6	5.05	5.67	4.22	2.93	2.69	2.16	2.67
Efcab10	0.26	0.11	0.09	0	0.57	0.28	0.16	0.41	13.41	13.07	13.21	13.64	1.98	1.61	1.72	0.47	57.72	61.19	74.6	60.08	0.53	0.09	0.24	0.17	0.09	0.1	0.09	0
Atp6v1c2	6.09	1.22	3.14	3.31	75.89	67.38	82.4	60.58	14.51	15.76	14.11	14.44	2.1	3.57	2.84	3.67	0.63	0.23	0.66	0.49	47.74	40.5	32.49	40.81	3.2	1.74	1.78	2.3
Agr2	73.82	55.09	86.26	120.88	0.35	0.21	0.18	0	0.15	0.22	0	0.07	9.18	11.15	12.72	21.82	0	0	0.06	0	0.33	0.32	0.17	0.25	0.76	0.59	0.55	0.25
Ntsr2	125.98	77.69	111.6	152.35	0.19	0	0.06	0	0.82	0.82	0.86	1.16	0.96	0.99	1.31	0.41	0.08	0.2	0.14	0.19	0.02	0.06	0.15	0.26	0	0.02	0.02	0
Sdc1	61.82	18.41	54.38	47.07	10.88	10.38	10.52	6.79	4.24	4.98	5.49	5.36	105.66	96.6	122	97.54	1.61	1.77	1.62	1.82	10.6	11.97	25.65	9.65	12.93	11.3	12.4	11.73
Lpin1	19.96	7.86	15.79	15.77	8.78	8.84	10.01	6.58	29.79	29.64	34.15	30.33	9.43	9.84	9.37	10.85	99.99	107.81	105.07	102.08	12.97	10.46	10.67	12.01	7.84	8.69	7.19	7.86
Slc7a15	0.25	0.04	0.03	0	2.19	15.82	6.53	2.9	25.53	18.48	19.42	22.77	1.17	1.08	1.66	0.9	0.4	0.27	0.51	0.62	189.09	186.09	130.37	201.23	11.99	7.69	11.88	15.2
Trib2	6.62	2.34	7.05	6.65	2.93	2.28	2.65	1.61	13.74	14.68	15.6	16.1	4	4.04	5.29	5.11	0.53	0.59	0.83	1.03	2.69	2.73	3.74	2.63	1.97	1.94	2.42	2
Fam84a	23.19	7.69	22.25	17.39	18.61	15.88	17.86	12.71	0.85	1.35	0.88	0.88	49.85	49.17	51.46	45.75	16.2	14.35	15.82	16.53	9.34	7.41	7.46	8.84	2.11	1.67	1.68	2.15
Amz2	13.34	5.99	13.11	11.71	16.03	15.77	16.18	12.85	15.13	12.87	15.61	13.27	10.71	12.8	11.55	11.61	100.46	97.93	95.49	93.19	17.34	15.58	14.7	16.91	12.22	11.91	12.05	12.21
Fam20a	0.6	0.17	0.7	0.71	1.23	1.03	1.44	0.68	1.71	1.74	1.47	1.12	0.52	0.48	0.57	0.82	7.69	7.52	7.66	7.49	1.95	2.32	2.07	1.6	2.28	2.1	2.13	1.63
Nt5c1b	1.26	1.24	1.29	1.96	1.68	2.59	2.51	1.99	1.11	1.21	8.81	0.77	1.35	1.83	0.48	1.53	245.61	242.95	244.21	224.33	5.05	4.86	3.92	6.25	0.4	0.03	0.12	0.67
Map2k6	4.04	3.51	5.87	7.71	3.82	3.17	3.95	3.41	18.43	17.89	20.83	21.49	1.98	2.44	2.46	2.85	0.68	0.56	0.52	0.88	3.57	3.25	3.8	3.57	5.41	7.25	6.81	6.33
Allc	0.4	0.51	0.54	0.98	0.6	1.33	1.11	1.18	0.87	0.48	4.69	0.61	0.93	1.83	0.65	0.97	253.35	282.87	260.73	243.96	1.22	1.29	0.74	1.76	0.04	0.04	0.04	0.55
Pfn4	0.7	0.62	1.36	1.3	0.11	0.47	0.43	0.23	0.19	0.11	0.94	0.22	0.22	0.72	0.49	0.41	34.54	36.19	39.26	34.6	0.32	0.28	0.43	0.31	0.2	0.08	0.13	0.31
Rnf144a	0.52	0.25	0.79	0.36	0.63	1.03	0.99	0.41	1.95	1.98	2.12	2.29	0.65	0.7	1	0.62	7.49	5.91	6.38	7.09	0.58	0.6	1.98	0.57	1.28	1.21	1.14	1.06
Id2	11.58	6.12	13.32	11.63	9.08	10.94	10.99	7.07	30.97	30.62	32.95	28.21	7.78	7.66	7.47	7.71	1.88	1.85	2.82	1.71	52.94	55.65	57.16	57.98	36.58	33.74	33.44	34.78
Mboat2	17.22	6.21	14.67	19.03	37.84	38.26	47.37	35.97	4.83	3.24	3.88	4.94	1.43	1.84	1.79	1.65	4.36	4.49	5.44	5.58	34.51	32.72	21.9	32.93	3.76	3.37	2.95	4.76
Bcap29	1.59	0.61	1.79	2.17	1.1	1.77	1.92	1.77	1.53	1.15	1.63	1.6	1.24	1.88	1.67	1.51	31.74	29.77	31.01	32.68	1.55	1.77	2.25	1.67	1.98	2.16	1.97	1.54
Dnajc27	2.89	1.09	2.61	2.59	2.45	3.47	4.25	2.57	2.6	2.65	3.85	2.55	1.58	2.01	1.56	1.47	40.08	39.96	41.74	43.75	2.62	3.05	2.48	2.04	3.02	2.58	2.48	2.59
Efr3b	8.12	2.98	6.35	7.34	17.03	20.54	24.31	13.05	1.33	0.91	1.29	1.04	1.19	2.06	2.17	3.16	0.48	0.67	0.72	0.7	17.05	14.64	10.75	15.11	1.17	0.92	0.87	0.81
Pomc	0.63	0.51	0.28	0.68	0.8	1.02	0.85	0.32	0.26	0.32	0.31	0.06	0.13	0.05	0.06	0.48	2.35	3.04	2.98	3.63	0.51	0.34	0.51	0.27	0	0	0	0
Tpo	0.31	0.02	0.14	0.08	0	0	0.02	0	0.02	0.02	0.04	0.04	0.06	0.09	0.02	0.08	0.4	0.34	0.51	0.61	0.05	0.02	0.05	0.02	0.02	0	0.17	0
Ace	511.36	239.13	406.65	484.91	24.98	23.37	23.78	13.85	121.19	117.97	119.2	95.84	36.55	44.78	39.52	63.75	133.76	129.22	128.22	131.82	9.77	10.04	15.08	9.51	17.19	16.68	15.17	11.46
Gas2l2	0.11	0.06	0.02	0.1	0	0.02	0.17	0.02	19.78	21.63	22.11	19.11	0.88	1.18	1.26	0.7	0	0.02	0	0	0.05	0.02	0.02	0.06	0.05	0.05	0.07	0.12
Itgb3	1.28	0.45	1.26	0.85	1.07	1.12	1.4	0.65	1.71	1.68	2.07	1.94	1.56	1.51	1.79	1.33	0.49	0.47	0.52	0.91	1.94	2.15	7.04	1.48	8.14	7.25	7.45	7.94
Efcab3	0.07	0	0.03	0.07	0	0.04	0.03	0.03	0.04	0	0.22	0	0	0.03	0.1	0.04	4.81	5.28	4.93	5.82	0	0	0	0.03	0	0.11	0.11	0.09
Cct6b	0.92	0.53	1.21	1.34	1.34	2	1.63	1.42	1.72	1.27	2.94	1.15	0.86	0.92	0.36	0.37	105.68	101.97	108.5	109.74	3.57	2.69	1.98	2.37	0.97	0.82	1.06	1.12
5530401A14Rik	0	0	0	0	0	0	0	0	3.01	2.53	2.52	2.16	0.04	0.08	0.08	0.24	0	0	0	0	0.02	0	0	0	0	0	0	0
Asic2	2.76	0.42	1.81	1.51	12.57	8.96	8.86	6.14	2.35	2.62	2.01	2.22	0.29	0.33	0.25	0.61	0.13	0.03	0.1	0.28	4.59	3.53	2.72	3.78	2.12	3.03	3.47	2.05
Tcam1	0.22	0.17	0.33	0.07	0.33	0.52	0.55	0.47	0.58	0.3	1.26	0.22	0.44	0.7	0.35	0.34	58.85	58.32	60.78	64.3	0.22	0.5	0.42	0.35	0.39	0.32	0.37	0.41
Cep112	3.71	3.76	5.36	6.26	2.8	3.19	3.62	2.66	8.02	9.07	9.01	7.92	2.99	2.92	2.82	2.63	35.04	35.82	34.95	33.21	2.9	2.6	2.79	3.46	2.16	1.93	1.78	2.26
Slc9a3r1	29.73	10.38	25.93	23.06	163.69	147.51	147.52	101.71	96.6	101.35	89.7	93.97	24.35	27.04	28.85	26.11	10.57	10.62	13.69	12.16	330.82	312.5	188.66	278.01	64.19	53.67	58.57	68.1
Jpt1	20.94	5.44	17.77	17.54	13.56	11.4	13.65	7.47	16.21	13.9	18.15	15.58	15.52	16.08	16.69	18.67	137.77	149.78	155.01	138.7	17.16	15.21	23.92	14.83	17.12	15.72	18.32	14.85
Camkk1	5.59	1.11	2.73	1.97	0.36	0.5	0.6	0.24	1.66	1.14	1.38	1.12	1.05	1	0.89	1.92	0.21	0.33	0.41	0.38	6.51	6.52	4.07	6.59	17.26	16.15	17.03	8.52
P2rx1	0.31	0	0.21	0	0.21	1.26	0.47	0.4	0.44	0.53	0.54	0.18	0.2	0.05	0.1	0.13	0.02	0.02	0.02	0.02	30.94	37.86	24.46	33.89	177.74	161.7	185.34	137.31
Galr2	0.76	0.39	0.57	0.83	0.2	0.29	0.31	0.17	2.04	1.74	1.71	1.88	0.32	0.74	0.44	0.52	0.11	0.03	0.03	0.24	0.27	0.33	0.52	0.26	0.16	0.07	0.03	0.23
Spns3	0.58	0.09	0.17	0.19	1.73	1.96	1.43	0.74	4.32	4.62	5.05	5.46	0.26	0.2	0.44	0.19	0.54	0.4	0.43	0.68	12.21	9.82	6.24	10.68	0.72	1.15	0.85	1.38
Tekt1	0.7	0.53	0.68	0.53	1.16	1.47	1.19	1.22	38.93	35.78	44.87	38.38	2.61	3.59	3.16	1.4	158.22	181.34	150.12	172.82	1.06	1.5	0.69	1.94	0.17	0.09	0	0.26
Slc13a5	0.04	0.05	0.03	0.1	0	0.09	0.17	0.07	0.74	0.7	0.94	0.82	0.19	0.31	0.09	0.13	21.22	18.85	15.98	23.8	0.25	0.18	0.17	0.1	0.08	0	0.13	0.11
Rhbdf2	5.22	1.76	5.34	2.48	1.4	1.1	1.42	0.87	8.51	8.08	7.47	7.09	26.66	22.86	29.3	24.55	2.31	1.9	2.1	1.93	1.83	1.46	4.25	1.6	2.67	2.7	2.98	2.16
Pld2	8.65	2.19	5.46	5.44	5.13	4.97	5.45	3.28	27.76	27.07	28.95	26.18	6.31	5.18	5.55	5.3	0.58	0.39	0.52	0.48	8.64	7.92	12.01	7.43	9.99	10.23	10.23	9.3
Coro6	0.55	0.41	0.56	0.55	0.48	0.53	0.91	0.47	2.78	3.14	2.65	2.04	0.42	0.51	0.5	0.29	0.45	0.57	0.68	0.7	1.43	0.61	0.77	1.02	6.23	6.42	6.02	4.79
Slc6a4	0.08	0.05	0.02	0.09	0.23	0.07	0.48	0.24	2.84	2.62	2.81	3.38	0.13	0.14	0.17	0.07	0.84	0.68	0.55	0.66	0.32	0.19	0.23	0.22	1.01	1.12	1.2	1.13
Tmigd1	0.04	0	0	0.09	0.09	0.48	0.04	0.04	4.12	3.71	4.21	4.97	1.27	0.68	0.86	0.71	0	0.04	0.04	0	0.04	0	0.11	0.04	0.18	0.47	0.26	0.37
Rph3al	2.62	1.14	2.43	1.93	2.66	2.92	2.54	1.76	15.86	17.77	17.16	17.77	5.6	6.21	5.58	6.09	0.87	0.95	1.06	0.7	2.85	3.09	1.49	2.57	1.88	1.43	1.86	1.5
Spata20	2.94	1.28	1.81	2.64	2.89	3.85	4.87	3.09	2.32	1.33	14.37	1.64	2.13	3.5	1.18	2.07	456.7	444.93	458.62	440.49	6.55	6.53	5.7	8.25	0.43	0.1	0.09	1.34
Lrrc46	4.18	1.14	3.56	4.66	2.65	4.91	3.32	3.02	16.02	16.23	24.09	13.74	3.3	5.3	2.65	3.08	356.86	361.68	362.88	335.19	3.5	4.56	3.05	5.24	0.52	0.25	0.19	0.84
Gucy2e	0	0.02	0.01	0.01	0	0	0	0.02	0.52	0.44	0.38	0.43	0.03	0.01	0.04	0.01	0.12	0.07	0.09	0.04	0.01	0	0.01	0.01	0	0.02	0.01	0.01
Aurkb	1.04	0.04	0.3	0.72	0.69	0.26	0.57	0.31	0.84	0.61	1.35	0.63	0.86	0.73	0.88	0.45	8.03	7.17	6.23	8.34	1.06	1.08	2.2	1.01	0.71	0.86	1.05	0.69
Pik3r5	1.26	0.51	0.77	1.01	1.82	2.2	2.58	1.47	1.16	1	1.11	1.24	0.53	0.64	0.39	0.48	0.25	0.26	0.21	0.34	1.18	1.29	11.87	0.74	1.32	0.87	0.92	0.93
Cfap52	2.16	0.69	1.19	1.49	5.38	5.23	7.98	4.5	24.96	23.69	25.37	24.13	1.91	1.74	1.8	1.15	49.52	49.15	44.6	52.59	2.12	2.77	1.49	2.17	5.17	4.16	4.2	4.78
Myh3	0.01	0	0	0.03	0	0.01	0.02	0	0.02	0.01	0.02	0.03	0	0	0	0	0.11	0.08	0.25	0.19	0.05	0.05	0	0.02	0	0	0.03	0
Top2a	0.94	0.44	0.93	1.35	1.39	1.1	1.81	1.2	2	1.65	3.19	1.51	1.93	2.73	2.51	1.19	43.3	38.67	38.51	48.34	2.11	2.33	3.34	2.38	2.81	1.99	2.61	2.21
Krt36	0.04	0	0.03	0	0.04	0	0.03	0	0.04	0.16	0.08	0.04	0	0	0	0	0	0	0	0	0.07	0.14	0.13	0.3	0	0	0.04	0
Adam11	1.48	0.3	0.89	0.54	1.06	0.94	0.92	0.42	26.84	29.74	26.85	28.75	0.47	0.49	0.92	0.46	3.21	3.05	2.87	4.26	1.12	1.03	1	1.34	6.19	5.96	6.84	4.75
Higd1b	1.29	0.31	0.63	0.52	2.71	1.27	2.56	1.05	0.19	0.54	0.61	0.27	0.19	0.62	1.33	0.86	0.15	0.21	0.07	0.16	0.8	0.48	0.43	0.3	0.17	0.27	0.17	0.1
Ccdc103	0.35	0.41	0.66	0.35	0.17	0.2	0.63	0.21	5.35	4.2	5.25	5.69	1.37	0.93	1.69	0.79	9.54	9.46	10.41	12.27	0.32	0.41	0.55	0.58	0.27	0.18	0.4	0.41
1700023F06Rik	0.35	0.06	0.05	0.16	0.43	0.26	0.65	0.09	0.34	0	1.65	0.11	0.35	0.43	0.36	0.58	68.62	74.42	78.57	65.87	0.2	0.44	0.22	0.61	0.1	0	0.21	0
Map3k14	6.78	2.34	4.58	4.5	2.74	2.68	2.71	1.56	20.93	19.93	19.15	18.56	4.86	4.13	4.86	4.09	1.2	0.99	1	1.13	3.61	2.86	4.22	2.52	3.84	4.05	4.15	3.54
Coch	0.42	0.06	0.13	0.24	3.21	2.1	4.44	2.12	0.18	0.1	0.1	0.22	0.03	0	0.05	0.05	0.18	0.25	0.18	0.29	1.01	1.27	0.43	0.92	3.4	4.98	4.58	6.41
Tshr	0	0	0.07	0.04	0.1	0.33	0.31	0.13	4.23	4.95	3.56	4.92	0.08	0.27	0.23	0.04	2.43	2.1	2.03	2.17	0.07	0.2	0.11	0.17	0.57	0.54	0.46	0.16
Dnaaf2	0.25	0.07	0.41	0.25	0.21	0.44	0.34	0.11	3.03	2.36	2.94	2.36	0.6	0.46	0.45	0.35	8.43	8.52	8.79	9.94	0.24	0.29	0.2	0.31	0.22	0.31	0.18	0.18
Pole2	0.59	0.22	1.26	1.17	0.64	0.81	1.36	0.45	1.36	0.78	1.16	1.79	4.68	4.35	5.54	3.34	0.8	0.75	0.99	0.73	1.32	1.03	1.18	1.08	1.4	1.72	1.42	1.5
Cdkl1	0.74	0.14	0.76	0.23	0.3	0.37	0.36	0.23	6.96	6.18	7.01	6.9	0.46	0.71	0.9	0.56	9.59	9.37	10.77	11.41	0.67	0.62	0.69	0.43	62.05	57.46	62.2	66.46
Spata7	5.46	3	5.96	7.61	4.5	4.82	5.55	5.36	11.36	11.06	11.95	10.84	4.49	6.45	3.98	4.76	136.97	138.41	148.09	133.71	5.33	5.89	5.59	5.74	4.62	4.02	4.61	5.17
Psma6	34.29	27.67	47.9	46.05	41.59	46.69	44.58	30.42	29.79	35.41	33.28	35.87	49.35	53.41	47.56	48.6	246.21	253.93	238.67	229.61	48.12	45.08	44	39.03	46.88	54.22	51.93	55.99
Ngb	0.44	0	0.18	0.08	0.52	0.35	0.27	0.1	0.25	0.41	0.95	0.36	0.26	0.14	0.15	0.35	0.81	0.51	0.37	0.73	0.62	0.87	0.52	0.83	4.51	5.04	6.07	4.88
Akap5	0.2	0.19	0.34	0.25	0.12	0.23	0.25	0.17	0.33	0.44	0.34	0.53	0.22	0.24	0.21	0.37	0.19	0.08	0.14	0.21	0.46	0.38	0.36	0.55	2.26	2.59	2.25	2.03
Atl1	0.99	0.49	1.03	1.26	0.92	1	0.93	0.94	1.74	1.5	1.74	1.88	0.91	0.84	0.75	0.8	11.43	12.62	12.42	11.65	1.15	1.14	1.33	1.1	1.81	1.85	1.49	1.76
Nin	2.04	1.1	2	1.75	3.45	2.97	3.52	2.39	14.81	15.29	15.04	15.11	2.31	2.62	2.86	1.8	0.33	0.21	0.21	0.37	2.56	2.68	5.82	2.58	3.23	2.87	2.94	2.8
Trim9	2.85	1	2.73	2.82	2.03	2.1	2.2	1.67	2.15	2.16	2.2	2.02	9.1	7.89	7	6.47	0.45	0.33	0.53	0.38	0.5	0.72	0.52	0.63	1.59	0.99	1.34	0.89
Actr10	7.48	3.34	8.15	7.67	7.21	6.77	8.82	6.1	8.26	7.86	9.97	8.52	9.78	12.56	10.79	10.37	65.25	65.64	74.48	63.7	9.48	9.32	9.52	8.27	11.63	12.42	11.82	10.87
Rtn1	0.75	0.36	0.5	0.74	0.44	0.5	0.46	0.29	3.22	3.63	3.35	3.16	0.52	0.82	0.64	0.54	18.21	17.43	17.29	19.42	0.85	0.82	0.44	0.56	0.92	0.77	0.65	0.87
Lrrc9	8.1	4.31	9.9	11.56	0.31	0.45	0.68	0.43	6.9	6.29	9.77	7.93	1.99	3.82	2.82	3.62	98.13	97.5	105.64	97.55	0.85	0.83	0.5	1.06	0.07	0.03	0.05	0.14
Serpina3n	3.68	2.37	6.05	4.26	8.88	9.89	13.84	7.22	37.26	38.82	35.24	34.1	3.29	3.29	2.63	4.72	0.87	0.79	0.53	1	10.43	9.25	29.36	9.66	7.3	7.01	4.75	7.57
Plek2	15.6	12.58	19.8	14.06	2.44	2.25	2.62	2.2	3.63	3.8	3.56	3.78	17.81	23.9	19.74	29.11	0.14	0.23	0.34	0.3	2.69	2.44	1.67	1.84	1.39	1.81	2.04	2.56
Rdh12	2.74	0.86	2	2.31	1.84	1.77	2.21	1.67	3.1	2.28	3.21	1.61	5.85	5.83	5.68	5.12	0.08	0.15	0.14	0.19	1.25	0.85	1.27	1.18	2.21	1.99	2.05	2.02
Slc10a1	0.03	0.17	0.1	0.18	0	0	0.03	0.06	0.12	0.11	0.04	0	0	0	0.14	0.04	0.03	0	0	0.03	0.03	0	0	0.03	0	0	0	0.04
Efcab11	0.23	0.07	0.26	0.27	0.06	0.22	0.12	0.07	1.86	1.71	2.1	1.52	0.4	0.44	0.49	0.36	4.95	5.51	5.03	5.23	0.21	0.26	0.24	0.23	0.42	0.19	0.36	0.41
Tdp1	3.31	1.55	3.35	2.83	2.22	2.18	2.76	1.74	4.21	4.66	5.58	4.42	2.06	2.43	2.26	2.58	25.39	25.97	28.37	24.14	1.83	1.92	2.24	1.92	3.61	3.4	3.33	3.14
Pfkp	2.2	1.29	2.36	2.19	1.83	2.04	2.72	1.3	9.39	9.09	8.86	8.84	2.38	3.05	3.14	2.68	22.97	21.37	18.81	24.69	4.7	4.33	6.09	3.53	5.54	4.75	4.85	5.43
Asb2	5.49	1.98	7.29	5.56	2.58	2.41	1.69	1.33	4.09	4.13	4.02	4.33	3.59	3.14	4.74	4.75	1.52	1.5	1.48	1.91	8.13	8.47	6.41	7.43	22.85	21.6	23.32	19.9
Otub2	0.94	0.33	0.67	1.07	1.51	1.68	1.56	0.75	1.48	1.56	2.46	1.37	0.69	1.1	1.08	0.74	69.2	63.47	59.9	60.16	2.23	1.31	1.67	2.07	1.67	2.05	1.81	1.65
Ifi27l2b	0	0	0	0	0	0	0	0	0.63	0.54	0.53	0.36	0	0	0.11	0	0	0	0	0	0	0	0	0	0	0	0	0
Ppp4r4	0.73	0.17	0.82	0.79	1.82	2.16	2.99	2.05	0.79	0.75	1.48	0.89	0.53	0.52	0.49	0.32	21.73	21.46	22.86	23.21	1.06	1.02	0.97	1.24	0.52	0.64	0.61	0.47
Akr1c12	4.9	1.15	2.67	2.09	72.96	64.38	79.3	56.15	5.91	5.35	5.99	4.7	0.83	2.08	1.11	2.41	1.38	1.34	0.52	1.31	28.18	25.41	23.74	27.5	2.69	3.17	3.15	4.23
Akr1c13	8.94	4.96	6.71	6.61	57.93	59.97	61.86	48.71	14.19	14.41	17.08	14.65	8.59	10.82	8.17	11.67	3.24	3.82	2.93	3.7	77.72	81.63	55.82	71.25	12.04	12.9	10.67	15.77
Net1	29.2	15.94	29.99	32.9	10.73	11.79	13.33	8.13	140.99	136.5	138.69	130.73	27.24	31.04	30.79	26.56	7.48	7.82	8.06	8.03	21.29	22.14	16.01	19.31	28.42	28.88	28.49	31.44
Rgs6	0.52	0.31	0.43	0.61	0.68	0.53	0.55	0.42	2.13	1.86	2.58	2.34	0.51	0.48	0.47	0.43	0.53	0.38	0.44	0.33	1.33	1.48	0.97	1.28	21.88	19.66	17.51	12.5
Dpf3	0.42	0.41	0.63	0.55	0.25	0.26	0.41	0.14	0.26	0.25	0.61	0.27	1.61	0.93	1.05	1.05	7.05	7.74	8.11	7.05	0.28	0.34	0.19	0.27	1.16	1.02	0.93	0.65
Acot3	0.02	0	0	0	0	0	0.02	0	0.14	0.12	0.17	0.19	0	0	0	0	0.03	0.01	0	0	0	0	0	0	0	0	0	0
Npc2	391.25	149.44	286.91	333.32	774.33	669.05	651.52	519.26	34.5	35.25	29.96	29.82	98.87	106.02	111.27	114.2	9.69	9.73	10.18	9.86	80.9	63.97	115.77	68.62	35.72	32.87	35.4	28.54
Fos	1.38	0.54	1.4	0.58	1.71	2.4	1.84	1.78	9.5	13.14	16.81	4.42	1.23	2.66	2.26	1.11	0.44	0.07	0.18	0.06	2.44	2.72	4.59	1.78	7.66	3.42	1.77	0.85
Angel1	3.85	1.17	2.31	2.75	2	1.39	1.75	1.25	3.16	2.61	4.85	3.11	2.29	2.08	1.71	1.77	73.72	76.28	75.42	79.33	1.4	1.76	1.5	1.59	4.08	3.76	3.95	4.21
Ccnk	13.49	8.48	13.09	12.65	8.02	11.49	10.16	7.43	14.39	13.56	17.89	14.15	13.85	13.26	11.97	10.61	159.52	138.98	145.67	150.73	13.27	13.86	10.94	13.76	16.46	16.02	16.73	15
Hhipl1	0.41	0.24	0.45	0.25	0.21	0.25	0.48	0.09	0.55	0.72	0.61	0.63	3.18	2.71	2.37	2.14	0.28	0.3	0.46	0.24	0.48	0.62	0.99	0.44	0.75	0.8	0.77	0.83
Degs2	5.63	1.19	5.74	2.26	0.07	0.33	0.16	0.16	6.37	4.51	6.62	7.76	9.19	8.13	6.85	9.91	0	0.06	0.06	0.1	0.48	0.78	0.28	0.78	1.71	1.66	1.18	2.82
Hsp90aa1	17.62	13.53	28.52	26.4	24.4	25.5	29.97	24.53	88.93	85.84	100.38	98.83	34.71	41.71	37.2	34.7	305.1	329.94	274.91	325.59	28.85	27.95	28.3	30.2	28.57	28.64	26.5	31.54
Kif26a	0.39	0.11	0.35	0.37	0.24	0.19	0.26	0.06	37.17	37.43	39.61	39.86	1.88	1.79	2.56	1.07	0.53	0.41	0.51	0.71	0.2	0.24	0.52	0.16	0.5	0.61	0.64	0.28
Hecw1	0.01	0	0	0.05	0.03	0.01	0.05	0.02	0.04	0.01	0.05	0.01	0.03	0.02	0.01	0.02	3.23	3.7	3.11	3.27	0.03	0.06	0.01	0.04	0.01	0.01	0	0.03
Ryr2	0.42	0.17	0.37	0.26	0.1	0.22	0.21	0.13	0.43	0.27	0.37	0.33	0.07	0.07	0.07	0.11	0.13	0.16	0.16	0.22	1.94	2.13	1.19	1.88	9.04	9.46	9.78	8.28
Amph	0.14	0	0.12	0.06	0.11	0.15	0.15	0.11	0.14	0.06	0.25	0.37	0	0.03	0.05	0.06	2.59	2.63	3.51	2.67	0.12	0.12	0.17	0.05	0.37	0.18	0.29	0.18
Sfrp4	0.16	0.08	0.16	0.22	0.64	0.56	0.93	0.7	0.05	0.08	0.08	0.08	0.4	0.31	0.33	0.27	0.01	0	0.01	0	4.66	3.79	4.01	3.87	1.5	1.09	0.84	2.04
Slc17a4	0	0	0	0	0.03	0.03	0.08	0.01	0.05	0	0.03	0.06	0	0	0	0	0	0.05	0.01	0.04	0.01	0.04	0.05	0.03	0.37	0.61	0.44	0.68
Gcnt2	7.71	3.08	8.18	6.69	1.4	1.72	1.77	1.03	14.5	13.81	13.29	14.56	5.27	6.35	5.62	7.5	0.38	0.28	0.4	0.38	3.02	3.38	3.9	2.95	28.13	28.98	28.35	28.9
Elovl2	25.09	9.73	19.57	21.35	18.99	17.42	21.32	17.09	2.19	2.31	3.23	2.24	5.88	7.92	5.34	5.2	82.21	76.38	78.29	88.6	1.06	0.66	0.52	0.83	0.02	0.05	0.15	0.22
Nedd9	19.61	11.42	20.48	17.5	2.59	2.83	3.44	1.93	50.41	50.48	47.88	52.76	19.92	19.03	19.24	21.56	1.19	1.61	1.72	1.3	3.69	2.65	4.42	2.69	9	10.45	11.95	12.75
Ippk	6.5	2.12	5.08	6.24	24.59	23.14	25.66	19.29	5.72	5.11	5.27	5.04	4.91	5.79	5.33	4.39	5.21	5.05	4.45	5.58	7.89	6.35	6.83	6.82	5.62	5.58	5.57	5.4
Cenpp	0.35	0.15	0.37	0.81	0.28	0.3	0.54	0.32	0.8	0.9	1.21	0.41	0.1	0.42	0.53	0.43	15.71	16.89	19.86	17.72	0.66	0.63	0.72	0.6	0.98	0.39	0.36	0.51
Nol8	3.45	2.64	4.77	5.28	3.12	4.05	4.62	4.01	2.81	3.11	4.46	3.35	5.27	6.55	5.03	4.66	75.47	70.16	61.46	74.42	3.56	4.01	3.71	4	3.11	3.14	3.03	3.31
Fam217a	0.32	0.41	0.43	0.29	0.24	0.94	0.78	0.94	0.94	0.91	3.04	0.73	2.56	1.69	2.01	1.68	86.07	86.34	92.99	77.23	0.79	0.88	0.48	0.63	0.5	0.36	0.13	0.41
Eci3	0.09	0	0	0.05	0.1	0.09	0.21	0.08	1.57	0.88	0.81	0.92	0	0.04	0.23	0	0	0.15	0.12	0.04	0.04	0.09	0.08	0	43.68	40.01	41.14	48.27
Fbp2	0.09	0.11	0	0	0	0	0	0	66.14	66.02	67.75	61.41	2.22	3.29	3.79	0.79	0.08	0.26	0.56	0.13	0.09	0	0	0	0.05	0.05	0	0
Syk	76.86	33.67	58.39	71.52	2.07	1.98	2.53	0.95	2.68	2.82	2.71	2.53	4.12	3.46	5.14	2.75	0.66	0.74	0.5	0.75	2.82	2.09	29.03	1.85	2.89	3.33	2.71	2.88
Msx2	0.1	0.09	0.07	0.1	0.16	0.1	0.11	0.11	0.47	0.46	0.68	0.72	0.17	0.23	0.25	0.15	0	0.04	0.04	0.1	0.58	0.57	0.28	0.5	1.25	1.63	1.37	0.89
Habp4	6.03	4.76	6	6.28	3.47	3.32	3.39	2.28	8.07	8.1	7.97	8.54	5.66	5.19	5.48	5.45	33.62	36.29	34.4	29.24	4.97	5.81	4.3	4.9	5.03	5.26	5.43	4.93
Cdk20	1.41	0.28	0.92	0.7	0.8	0.58	0.7	0.4	4.33	3.39	3.68	3.4	0.54	0.5	0.62	0.6	9.66	8.99	7.64	10.78	0.78	1.07	2.36	0.76	1.04	0.73	0.89	0.84
Slc34a1	0.01	0.02	0	0	0	0	0.01	0	3.12	2.84	2.67	3.94	0.12	0.14	0.25	0.14	0.04	0.08	0.07	0.03	0	0	0	0	0	0	0	0
Pdlim7	10.62	4.21	11.42	9.16	4.8	5.07	4.52	2.1	14.31	13.38	11.44	12.21	15.31	12.33	17.29	14.12	1.22	1.29	1.43	1.36	16.99	21.64	16.76	17.87	68.57	65.6	74.23	53.27
Catsper3	0.45	0.34	0.48	0.29	0.77	0.33	0.71	0.29	1.34	1.19	2.65	1.47	0.37	0.56	0.5	0.29	36.84	46.98	56.66	36.23	0.58	0.53	0.44	0.34	1.09	0.8	0.61	0.68
Pitx1	0.02	0.03	0	0	0	0	0	0	0	0.08	0.03	0.05	0	0	0	0	0	0	0	0	0.14	0.12	0.06	0.09	0.03	0	0	0
Slc25a48	1.14	0.27	0.58	0.51	6.19	5.22	5.79	2.95	0.26	0.29	0.23	0.37	0.04	0	0.05	0	0.02	0.15	0.19	0.09	3.56	4.01	2.05	3.6	3.68	3.32	3.16	3.81
1700001L19Rik	0.29	0.17	0.45	0.49	0.28	0.75	0.24	0.45	3.14	2.32	4.13	2.1	0.19	0.13	0.2	0.35	25.22	33.8	35.58	26.16	0.32	0.13	0.26	0.31	0.14	0.07	0.03	0.16
Lect2	0	0	0	0	0	0	0.07	0	0.41	0.71	0.54	1.24	0	0.07	0.15	0	0	0	0	0	0	0	0	0	0	0	0	0
Slc28a3	6.12	3.39	9.29	6.88	0.51	1.3	1.1	0.37	2.68	2.37	2.23	2.32	32.43	36.91	34.14	31.38	0.39	0.38	0.43	0.34	8.34	7.93	6.13	7.63	87.47	79.39	93.51	55.52
Golm1	14.64	5.42	12.83	14	52.88	45.19	52.83	39.25	20.66	21.22	19.5	19.53	6.94	8.7	9.06	10.54	1.79	1.87	1.35	2.09	16.28	15.27	13.39	15.87	4.76	4.52	3.83	5.09
Agtpbp1	6.62	3.1	7.09	6.87	7.35	7.7	8.23	7.16	6.63	6.2	7.46	6.95	2.31	2.74	3.05	2.75	42.83	40.89	40	43.05	6.22	5.67	6.45	5.37	8.67	8.32	7.9	8.08
Slc6a19	0.21	0.13	0.08	0.06	0.23	0.25	0.16	0.2	3.46	3.6	3.74	4.29	0.23	0.19	0.07	0.06	0.01	0.01	0.03	0.01	0.1	0.08	0.13	0.03	0.04	0.08	0.01	0.11
Trip13	0.49	0.31	0.6	0.74	0.23	0.29	0.41	0.24	0.58	0.53	0.72	0.75	0.25	0.42	0.5	0.56	3.96	3.92	4.79	4.26	0.43	0.31	0.62	0.4	0.46	0.39	0.75	1.06
Cep72	0.9	0.32	0.67	0.95	1.99	1.58	2.4	1.36	1.51	1.27	2.46	1.8	0.52	1.04	1	0.63	41.62	42.29	45.01	45.4	1.6	1.71	1.88	1.82	1.18	1.42	1.26	1.28
Lrrc14b	0.11	0.17	0.29	0.26	0.16	0.11	0.06	0.04	0.35	0.14	0.12	0.17	0.03	0	0.04	0.09	0.02	0.02	0.02	0	0.3	0.21	4.7	0.06	0.71	0.85	0.95	1.34
Spata9	0.17	0.58	0.71	0.36	0.67	1.48	1.57	1.78	0.52	0.5	0.73	0.37	0.93	1.24	1.56	1.02	55.03	62.9	72.74	48.6	0.28	0.94	0.6	0.85	0.89	0.38	0.76	0.99
Srd5a1	3.41	0.92	4.46	2.77	16.12	14.71	17.84	13.58	4.52	3.83	3.58	4.51	16.3	17.72	14.82	17.02	1.28	1.34	1.32	1.63	1.59	1.75	1.72	1.21	1.02	0.81	1.01	0.8
Med10	4.55	1.58	4.05	4.04	4.57	3.75	4.8	2.71	4.9	4.14	4.86	4.48	3.8	5	4.44	4.79	19.62	20.91	25.26	19.16	4.59	4.2	4.02	3.8	3.8	3.7	3.43	3.95
Slc6a18	1.34	0.4	0.8	0.91	1.94	1.38	1.21	0.97	0.3	0.24	0.4	0.41	0	0.06	0	0	0.04	0.02	0.04	0.01	0.41	0.37	0.25	0.19	0.09	0.13	0.06	0.11
Acot12	0.04	0.02	0.11	0	0.08	0.27	0.2	0.2	1.72	1.92	2.13	2.43	0.05	0.24	0.1	0.1	2.43	2.28	2.28	1.99	0.04	0	0.05	0	0.25	0.15	0.37	0.05
Naip1	0.23	0.11	0.13	0.31	0.26	0.55	0.69	0.32	0.38	0.31	0.14	0.25	0.09	0.21	0.12	0.12	0.12	0.1	0.11	0.04	0.16	0.15	0.63	0.22	14	13.5	11.33	12.85
Serf1	13.73	17.64	29.36	34.69	9.52	12.68	8.29	8	5.23	5.39	8.62	7.04	18.51	20.16	16.15	17.36	359.78	324.36	361.97	293.03	8.85	8.58	9.15	9.51	5.22	4.55	5.16	5.12
Cartpt	0.58	0.12	0.23	0.05	0	0	0	0	0	0	0.05	0.16	0.11	0.18	0	0.05	0	0.04	0	0	0.05	0	0	0	0.36	0.32	0.2	6.49
S100z	13.69	11.47	14.26	15.28	0.48	0.31	0.14	0.14	0	0	0	0	0.7	2	0.61	1.74	1.23	0.9	0.82	0.89	0	0	0	0	1.57	1	1.24	2.45
Crhbp	0.2	0.04	0.13	0.14	0.8	0.67	1.21	0.37	0	0	0.07	0	0.47	1.06	0.34	0.68	0.12	0.06	0.12	0.1	0.1	0	0.03	0	0	0.07	0	0
Pde8b	5.61	1.39	2.7	3.77	22.12	19.33	27.08	16.76	0.98	1	0.91	1.18	1.39	1.12	1.18	1.09	1.44	1.27	1.56	1.28	35.7	33.41	23.86	32.12	22.09	19.83	19.78	19.04
Kif2a	3.73	2.73	5.22	5.82	4.38	6.1	5.73	5.15	4.73	5.05	6.68	5.71	5.25	5.89	5.43	5.54	49.57	44.38	45.99	44.95	6.44	6.97	6.99	7.4	6.62	5.91	6.61	6.43
Ercc8	1.95	0.7	1.82	1.83	2.07	1.93	2.36	1.89	2.92	2.74	2.89	3.71	1.73	2.2	2.49	1.52	10.94	12.29	13.84	13.7	2.58	2.17	2.36	2.13	3.18	3.08	3.16	2.71
Elovl7	1.01	0.23	0.84	0.72	1.31	1.2	1.46	1.27	13.68	11.48	14.08	12.35	2.11	2.21	1.98	1.51	0.27	0.06	0.18	0.19	1.28	1.2	1.4	1.61	1.53	1.23	1.19	1.31
Depdc1b	0.16	0.03	0.16	0.1	0.15	0.12	0.19	0.02	0.4	0.41	1.22	0.46	0.25	0.22	0.21	0.05	8.9	7.75	9.33	9.04	0.23	0.25	0.31	0.48	0.44	0.18	0.39	0.32
Rasgrf2	2.92	1.5	3.69	2.63	0.38	0.6	0.63	0.34	1.37	1.67	1.47	1.22	0.94	1.29	1	2.2	0.29	0.25	0.23	0.28	1.32	1.59	1.18	1.1	9.41	8.51	8.18	8.29
Cenpk	0.46	0.29	1.15	1.14	0.37	0.51	0.69	0.77	0.69	0.25	0.74	0.56	0.67	0.25	1.06	0.58	9.17	8.34	9.54	8.91	0.34	0.37	0.89	0.46	0.6	0.55	0.27	0.76
Rgs7bp	0.35	0.15	0.28	0.21	0.23	0.3	0.27	0.25	3.17	2.99	3.33	2.24	0.24	0.4	0.37	0.35	0.04	0.08	0.08	0.17	0.97	1.02	0.69	0.88	2.93	3.8	3.21	3.72
Htr1a	0.41	0.12	0.34	0.26	0.07	0.22	0.32	0.18	0	0	0	0	5.04	3.78	4.57	2.71	0.02	0	0.02	0	0.09	0.08	0.06	0.07	0	0	0	0.02
Hcn1	0.01	0.01	0.01	0.02	0	0.01	0.01	0	0	0	0.01	0	0.01	0.01	0	0	0.07	0.1	0.11	0.08	0	0	0.01	0	0.02	0	0.01	0
Fgf10	0.65	0.46	1.2	0.36	0.73	0.76	0.75	0.63	0.96	1.41	1.29	1.58	0.2	0.36	0.49	0.55	0.4	0.55	0.62	0.52	0.79	0.38	0.63	0.61	5.49	6.39	4.75	4.05
Ptprg	9.65	3.86	11.91	8.55	3.54	3.05	3.69	2.63	23.54	22.07	24.31	21.73	58.3	57.57	58.81	43.18	4.25	3.89	3.77	4.55	5.9	5.92	5.54	5.2	12.74	11.68	12.24	11.74
4930452B06Rik	6.64	4.64	7.71	6.51	16.91	18.98	19.95	15.53	4.36	4.83	3.77	4.59	0.94	1.3	0.91	3.25	6.21	6.76	6.52	6.31	8.07	8.08	5.35	7.5	0.49	0.42	0.58	0.62
Oit1	0.66	0.06	0.14	0.36	2.05	3.44	2.78	1.63	2.29	2.11	3.01	1.77	0.5	0.14	0.49	0.4	47.03	46.11	51.54	40.81	7.22	6.68	1.94	5.23	0.65	0.37	0.25	0.84
Fam107a	1.44	0.85	1.57	1.33	1.37	1.24	1.08	0.71	22.44	21.38	21.27	21.82	1.57	1.95	2.42	1.48	1.31	1.23	1.52	1.6	0.9	0.83	0.89	0.71	4.24	3.84	3.26	3.4
Acox2	0.16	0.05	0.08	0.02	0.09	0.11	0.02	0	8.77	8.23	8.71	8.69	0.6	0.45	0.38	0.46	0	0.04	0	0.02	0.06	0	0.02	0.04	0	0	0.02	0
Plpp1	7.02	2.91	7.85	7.15	5.51	4.96	6.48	3.35	11.68	8.27	12.09	11.25	17.25	21.67	20.13	17.68	62.99	68.34	68.25	68.11	9.36	8.69	12.48	10.06	30.37	31.35	34.25	34.11
BC067074	1.29	0.87	1.47	1.26	0.77	0.75	0.82	0.56	10.41	10.15	10.15	10.7	0.95	1.36	0.94	1.02	0.16	0.11	0.09	0.14	0.9	0.94	0.98	1.18	1.63	1.78	1.7	1.67
Fst	0.23	0.26	0.56	0.44	1.06	0.84	1.17	0.72	2.02	1.37	1.2	1.37	0.48	0.31	0.26	0.51	0.29	0.33	0.23	0.25	7.92	8.59	10.79	6.95	18.37	18.05	16.65	15.58
Dusp13	0.68	0	0.47	0.4	0.59	0.47	0.92	0.32	0.24	0.45	2.53	0.19	0.4	0.85	0.21	0.76	85.2	95.54	109.78	88.49	0.68	0.7	0.91	0.29	0.68	0.46	0.6	0.39
Ngly1	6.86	3.33	8.38	7.88	6.36	7.03	8.2	6.64	8.46	7.88	10.11	8.24	8.07	9.78	8.11	7.71	79.41	76.53	85.23	77.92	8.83	8.28	10.93	7.89	12.61	12.97	12.26	13.21
Dydc2	0	0.47	0.14	0.71	0.08	0.31	0.2	0.07	12.12	11.72	12.2	9.79	0.09	1.61	0.9	1.39	40.62	42.77	39.34	39.24	0.51	0.43	0.45	0.07	0.23	0	0	0.09
9230112D13Rik	0.08	0	0.07	0.25	0.5	0.32	0.64	0.21	0	0	0	0.08	0	0	0	0	0	0	0	0	3.34	4.07	2.45	4.54	2.02	1.71	1.12	1.45
Ldb3	0.52	0.25	0.41	0.29	0.3	0.4	0.27	0.15	0.76	0.76	0.69	0.99	0.46	0.4	0.43	0.44	0.23	0.15	0.2	0.23	2.69	3.4	1.83	2.39	19.23	18.14	21.25	15.09
Cdhr1	0	0	0	0	0.03	0	0	0	0.05	0.09	0.1	0.03	0	0	0.03	0	0.57	0.61	0.63	0.68	0.03	0.01	0.15	0.03	0.01	0.03	0	0.03
Plau	9.53	0.68	3.22	4.41	40.16	33.97	42.91	26.84	6.66	6.55	5.63	6.37	3.23	3.64	4.64	7.64	0.42	0.5	0.74	0.68	26.43	24.28	22.81	24.88	212.12	210.75	181.5	186.37
Txndc16	24.43	10.49	18.95	24.48	68.96	75.88	91.21	72.98	8.71	8.09	8.99	7.72	9.08	11.11	9.54	8.91	11.15	11.68	12.32	11.87	39.73	39.94	33.06	40.91	14.8	13.25	12.41	11.83
Samd4	2.88	1.33	3.5	2.85	2.28	2.17	1.88	1.39	3.85	3.83	4.32	4.4	2.65	3.08	3.11	2.53	64.67	57.87	56.24	55.92	7.01	8.42	5.96	6.36	23.79	25.64	24.74	18.89
1700011H14Rik	4.1	3.12	6.64	7.47	70.85	57.99	59.74	67.23	29.2	30.73	30	33.52	2.56	2.41	2.48	1.87	11.37	11.41	12.36	10.11	14.75	11.99	10.26	13.75	1.02	1.26	1.37	2.01
Slc35f4	1.6	0.58	2.15	2.82	3.84	2.48	3.32	3.5	0.02	0	0	0	0	0	0.16	0.05	0.04	0.04	0.08	0.06	0.47	0.15	0.44	0.22	0.05	0.12	0	0.08
Rnase10	207.53	59.89	432.69	157.45	0.71	0	0.03	0	0.13	0.04	0.08	0.08	2589.42	2940.52	2973.9	2511.59	2.91	2.52	2.04	2.9	2.4	1.94	0.75	2.03	1.08	0.94	0.5	0.78
Asb14	0.06	0.07	0.06	0.12	0.12	0.09	0.08	0.05	11.87	10.45	12.84	12.22	0.92	0.83	1.07	0.46	3.78	2.71	3.49	3.3	0.26	0	0.05	0.03	0.21	0.26	0.12	0.18
Phf7	5.81	1.7	4.69	5.07	5.23	5.81	6.85	5.08	4.98	3.89	11.74	3.88	4.26	6.82	4.04	4.14	448.3	434.01	458.75	445.29	6.21	7.05	5.03	6.79	2.64	2.94	2.85	3.69
Glt8d1	15.15	7.11	17.72	18.38	19.21	18.01	20.91	16.64	15.08	13.83	16.8	16.46	14.6	16.79	15.33	14.13	90.55	82.77	91.07	95.68	13.3	13.67	14.96	13.82	14.97	13.58	14.54	11.68
Ptpn20	0.02	0.12	0.18	0.12	0.22	0.26	0.44	0.35	0.91	0.78	1.52	1.49	0.51	0.42	0.15	0.4	53.49	46.85	46.65	57.54	0.53	0.32	0.47	0.64	0.1	0.15	0.06	0.02
Tdh	0	0	0	0	0	0	0	0	0	0	0	0	0	0	0	0	0.09	0.27	0.17	0.31	0	0	0	0	0	0	0	0
4930578I06Rik	0.1	0.07	0.05	0.11	0.22	0.37	0.62	0.33	0.35	0.23	1.97	0.22	0.06	0.54	0.16	0.22	66.73	74.6	70.51	60.84	0.45	0.55	0.27	0.67	0.05	0	0	0.13
Ska3	1.47	0.84	1.44	2.24	0.34	0.08	0.32	0.17	0.82	0.47	1.02	0.92	0.53	0.76	0.81	0.59	4.76	4.26	3.83	4.66	0.47	0.31	0.59	0.35	0.83	0.47	1.02	0.6
Prss52	0.22	0	0.05	0	0	0.18	0.47	0	0.13	0.06	0.36	0.12	0.2	0.27	0.34	0.12	61.89	59.11	49.08	62.34	0.72	0.55	0.25	0.42	0.06	0	0	0
Atp8a2	1.11	0.45	0.9	1.21	1.18	1.2	1.15	0.84	0.77	0.62	0.98	0.81	0.28	0.43	0.32	0.36	6.84	6.94	8.07	6.81	0.9	0.9	0.72	0.73	2.38	2.19	2.55	2.84
Amer2	0.05	0.02	0	0	0.04	0.08	0.05	0.03	1.38	1.38	1.64	1.44	0.05	0.08	0.17	0.04	3.86	5.01	6.19	3.48	0.06	0.09	0.07	0.07	0.23	0.22	0.28	0.29
Mtmr6	8.69	4.4	9.47	8.95	7.35	8.14	9.92	7.17	17.32	14.65	19.46	16.09	12.2	13.53	12.16	11.67	87.54	86.95	90.74	94.27	11.71	11.06	16.84	12.34	20.39	21.03	20.62	20.85
Mipep	6.07	2.06	5.31	5.11	4.43	3.74	4.31	2.92	15.67	13.37	16.65	13.7	6.14	6.92	6.58	6.65	68.62	68.99	76.24	70.59	5.96	5.29	4.9	4.79	6.06	6.49	5.17	5.34
Lrrc63	1.79	1.18	2.54	2.04	0.84	0.84	0.77	0.92	0.19	0.11	1.47	0.21	0.72	1.11	0.68	0.93	52.11	45.07	47.79	52.17	1.74	1.3	1.26	1.14	0.35	0.11	0.15	0.42
Lcp1	118.64	59.18	133.85	124.59	14.24	16.27	19.08	12.16	18.35	18.81	15.76	19.02	193.28	205.68	192.11	173.78	1.01	1.23	1.03	1.15	25	25.68	80.27	25.45	16.54	15.4	12.7	16.25
Dnajc15	2.67	1.92	4.42	4.58	2.22	1.89	2.67	1.77	7.37	6.78	8.44	8.27	5.57	5.95	5.63	4.64	26.98	29.75	30.46	27.11	2.88	2.74	3.01	2.71	3.24	2.86	2.78	2.39
Diaph3	0.35	0.17	0.65	0.29	0.58	0.57	0.58	0.58	0.87	0.78	1.23	1.04	0.44	0.69	0.72	0.44	8.31	8.99	11.28	8.54	1.05	0.88	1.25	0.78	1.27	1.09	1.08	1.31
Olfm4	0	0	0.04	0	0.05	0.07	0.06	0.06	0.61	0.5	0.91	1.14	0.07	0	0.09	0.07	0	0.02	0.02	0.04	0.06	0.04	0	0.04	0	0	0	0
Pbk	0.86	0.22	0.57	0.45	0.9	0.4	0.58	0.64	0.68	0.38	1.52	0.98	0.98	1.49	1.6	0.96	49.93	51.96	49.83	58.81	0.82	0.85	1.69	0.91	1.39	0.47	0.83	1.31
Esco2	0.07	0.02	0.2	0.19	0.21	0.2	0.17	0.17	0.1	0.12	0.27	0.23	0.21	0.44	0.37	0.13	4.44	3.77	4.5	4.22	0.25	0.19	0.41	0.25	0.3	0.33	0.19	0.24
Clu	8477.38	4769.45	8338.46	9789.25	86.64	120.86	117.74	60.63	96.32	119.85	85.43	108.86	244.44	290	218.52	659.34	356.73	389.35	399.74	377.7	2126.09	1965.5	577.15	1230.02	874.72	592.4	723.07	1328.37
Adam2	0.33	0.12	0.18	0.28	0.71	0.73	0.82	0.61	0.75	0.29	2.43	0.54	0.93	1.25	0.19	0.22	135.54	130.67	139.88	145.91	0.67	0.87	0.6	1.21	0.22	0.26	0.15	0.56
Stmn4	0	0.06	0	0	0.28	0.23	0.2	0.2	0	0.05	0	0.05	0	0.04	0	0.05	0.04	0.04	0.12	0.13	0.74	0.43	0.27	0.33	0.05	0.05	0.05	0.11
Adamdec1	0.61	0.25	1.52	0.74	0.24	0.08	0.18	0.18	0	0	0	0	9.77	10.53	9.42	6.29	0	0.02	0.02	0.02	0.02	0.14	0.17	0.11	0.15	0.05	0.05	0.09
Pebp4	0.5	0.28	0.54	0.48	0.36	1.16	1.23	0.41	1.01	0.18	3.62	0.06	1.36	2.01	0.23	0.47	163.74	162.91	169.52	169.79	1.26	1.19	0.93	1.66	0.23	0	0	0.28
Ppp3cc	5.78	3.33	6.35	6.69	4.36	4.51	4.62	4.16	5.13	5.49	7.28	5.17	5.64	6.07	4.89	4.82	70.86	73.48	77.69	64.64	3.51	3.08	4.03	4.04	2.95	3.16	3.01	2.8
Hr	8.82	2.41	6.06	4.87	1.7	2.13	2.34	1.18	16.29	17.5	15.53	17.61	6.1	5.69	6.69	6.39	0.62	0.62	0.56	0.8	1.6	1.79	1.58	1.25	5.05	4.78	3.97	3.36
Sftpc	0	0	0	0	0	0	0	0	1.38	1.09	1.21	1.32	0.18	0	0	0.16	0.41	0.13	0.14	0.15	0	0	0	0	0	0	0	0
Dmtn	0.24	0.14	0.35	0.34	0.43	0.22	0.48	0.37	15.26	16.62	15.74	13.58	0.9	0.71	1.1	0.89	0.28	0.34	0.64	0.46	0.55	0.49	0.67	0.27	0.86	0.71	0.8	0.83
Gfra2	0.97	0.24	0.85	0.85	1.24	0.86	1.26	0.52	1.04	1.26	1.73	1.2	0.71	0.67	0.95	0.66	14.05	12.61	12.74	13.71	1.43	1.23	1.25	1.23	1.18	1.06	1.3	0.76
Sucla2	8.79	8.83	13.77	15	10.5	13.31	14.95	12.17	13.99	14.45	17.74	17.21	12.99	18.1	14.81	15.17	138.13	150.76	149.71	130.52	12.73	12.98	14.24	14.7	19.55	19.12	19.85	21.93
Uchl3	2.25	1.45	3.18	2.92	1.91	1.81	2.35	1.72	1.99	2.18	2.54	2.79	2.55	4	3.53	3.6	20.76	21.98	22.36	19.38	2.06	2.17	2.46	2.38	2.48	2.2	2.11	2.3
Gpc5	1.05	0.27	0.84	1.31	3.01	2.38	2.63	2.26	0.22	0.16	0.16	0.09	0	0.02	0	0.04	0.75	0.38	0.67	0.63	0.35	0.29	0.22	0.47	0.02	0.09	0	0
Scel	4.08	1.81	4.47	5.12	50.06	54.45	61.62	58.67	0.14	0.08	0.18	0.21	30.96	28.61	26.88	18.35	0.16	0.15	0.09	0.12	8.08	7	5	6.86	10.87	13.62	9.68	13.03
Cldn10	7.03	4.09	13.06	6.54	1.69	1.7	2.24	1.61	46.49	36.26	43.86	37.76	61.15	62.05	49.84	53.39	0.08	0.07	0.1	0.06	2.7	3.06	1.94	2.61	1.98	2.07	1.81	1.94
Gdnf	0.66	0.37	0.46	0.53	3.04	2.46	2.05	1.89	0.14	0.02	0	0.09	0.22	0.75	0.17	0.22	0.3	0.41	0.33	0.57	0.72	0.62	0.53	0.53	0.81	0.59	0.85	1.01
C9	0	0	0	0	0	0	0	0	1.44	1.42	1.62	2.64	0.07	0.08	0.3	0.09	0	0	0.05	0	0	0	0	0.03	0	0	0	0
Dab2	184.8	126.45	227.92	196.57	27.09	34.43	31.22	25.06	258	250.74	250.09	272.9	34.67	47.4	42.26	74.13	2.33	1.98	1.79	2.57	63.19	58.14	59.63	64.68	16.55	17.79	15.2	20.16
Mroh2b	0.75	0.19	0.63	0.66	0.91	1.46	1.82	1.27	0.99	0.62	5.05	0.71	0.8	1.31	0.4	0.72	202.98	186.96	197.97	206.02	2.06	1.86	1.8	2.78	0.16	0.06	0.04	0.42
Rem2	0.44	0.04	0.25	0.2	0.03	0.03	0.29	0	1.56	1.72	1.56	1.49	0.22	0.27	0.26	0.07	0.14	0.08	0.23	0	0.03	0	0.2	0.03	0.27	0.32	0.2	0.16
Slc7a8	25.17	10.55	19.23	18.76	4.23	4.85	5.8	3.84	2.95	3.29	3.13	3.13	69.14	53.17	61.22	45.88	11.24	10.38	9.67	11.78	10.13	10.83	12.53	9.7	10.87	11.63	12.02	11.18
C6	0.12	0.08	0.04	0.02	0.67	1.22	1.66	0.9	3.07	3.1	2.29	4.66	0.07	0.08	0.15	0.02	0.61	0.39	0.55	0.45	1.17	0.51	0.68	0.41	1.79	1.14	0.63	0.84
Slc22a17	11.8	1.87	6.91	5.12	3.07	2.24	2.73	1.64	36.56	34.02	34.87	30.85	8.56	8.15	10.1	9.3	1.84	2.03	3.15	2.45	3.4	3.51	4.27	3.47	6.95	7.56	7.76	6.32
Efs	5	1.41	3.88	2.73	3.87	3.42	5.28	2.14	23.71	24.49	22.09	23.45	3.47	3.7	4.35	3.93	0.42	0.44	0.76	0.61	4.31	4.5	5.71	4.43	5.32	5.13	4.13	3.75
Npr3	0.53	0.39	0.97	0.64	0.62	1.29	1.84	0.39	7.8	9.34	8.11	7.54	1.07	1.1	1.12	0.73	0.85	0.63	0.77	0.81	1.1	1	0.68	0.59	2.8	2.33	1.96	1.25
Cpne6	0.06	0	0	0	0	0	0	0	0	0.02	0	0	0	0	0.02	0	0	0.04	0	0.03	0.1	0.07	0.07	0.11	1.08	1.18	1.24	0.99
Fitm1	0.12	0	0.48	0.07	0.73	0.26	0.46	0.46	0.7	0.61	0.46	0.6	0.07	0	0.25	0.07	4.33	4.85	5.66	3.9	0.37	0.18	0.11	0.06	0.19	0.21	0.32	0.46
Cideb	0.64	0.31	0.43	0.42	0	0	0	0.09	66.5	65.73	61.91	67.16	2.6	2.31	3.32	1.36	0	0.08	0.04	0	0.05	0.29	0.13	0.14	0.26	0.39	0.2	0.25
Cma1	0.33	0.14	0.21	0.24	2.06	0.63	1.17	0.35	1.57	1.7	2.29	1.08	0.13	0.05	0.17	0.06	0	0	0	0	4.07	2.79	3.35	1.7	19.01	11.99	15.09	13.3
Atp12a	0.57	0.31	0.59	0.89	0	0	0	0	0.05	0.05	0	0.02	0	0.01	0	0	0.04	0.1	0.14	0.1	0.01	0.04	0.03	0.01	0.03	0.07	0.08	0.11
Ropn1l	4.84	1.99	3.82	3.49	6.65	5.87	8.91	4.85	7.79	6.49	19.25	4.49	3.36	4.78	2.3	3.1	596.76	597.93	679.45	562.82	10.56	12.91	7.52	13.05	2.56	2.93	3.57	2.51
Ankrd33b	0.24	0.05	0.11	0.11	0.16	0.1	0.08	0.06	5.43	5.72	4.98	5.55	0.58	0.68	0.69	0.41	0.32	0.36	0.32	0.55	0.11	0.07	0.69	0.09	0.27	0.3	0.19	0.32
Slc45a2	0	0	0	0	0	0.04	0.02	0	0.16	0.02	0	0.09	0	0.02	0	0	0.09	0.03	0.05	0.1	0	0	0	0	0.02	0.02	0	0
Skor1	0.05	0	0	0	0.09	0	0.03	0	0.02	0.02	0.07	0.05	0.02	0.02	0.05	0	0.81	0.87	0.6	0.97	0.03	0.06	0.01	0.11	0.03	0.02	0	0.04
Rai14	4.66	2.98	6.35	6	4.07	4.48	4.02	3.09	7.24	6.91	8.91	8.06	5.62	6.56	6.23	5.72	104.45	106.5	87.58	107.54	3.9	3.53	6.21	3.21	4.53	4.63	4.64	4.33
Ttc23l	0.15	0.08	0.27	0.27	0.3	0.42	0.4	0.31	0.28	0.03	1.33	0.13	0.47	0.33	0.06	0.16	64.28	70.72	83.08	59.79	0.24	0.49	0.27	0.67	0	0	0	0.12
Dnah5	0.27	0.2	0.14	0.1	0.05	0.04	0.02	0.01	42.05	39.44	45.48	43.68	2.57	2.7	3.15	1.59	0.61	0.52	0.86	0.68	0.16	0.29	0.12	0.14	1.14	1.07	1.05	0.78
Ank	10.64	3.51	6.85	9.65	37.07	35.78	39.06	26.62	8.19	7.6	7.3	7.09	1.42	1.6	1.38	1.75	3.37	4.26	4.51	3.99	31.18	34.24	19.25	29.8	9.35	10.05	9.95	10.37
Rnf19a	6.36	2.91	8.21	7.68	6.66	6.12	6.91	5.95	17.63	15.92	20.36	17.75	8.77	8.66	9.79	8.13	111.87	111.5	98.99	123.56	10.42	10.43	10.68	10.86	14.43	13.4	14.02	14.22
4930447A16Rik	0.1	0.26	0.3	0	0	0	0	0	0.12	0	0.44	0.11	0.12	0	0	0.11	0.56	0.35	1.58	0.4	0	0	0.09	0	0	0	0	0
Baalc	0.1	0.04	0.13	0.05	0.15	0.13	0.21	0.1	0.72	0.57	0.73	0.72	0.11	0.03	0.09	0.05	0.12	0.14	0.19	0.12	0.03	0	0.13	0.06	0.14	0.05	0.06	0.06
Dpys	0.05	0.06	0.38	0.26	0.1	0.18	0.07	0.07	0.11	0.38	0.47	0.4	2.44	2.43	5.22	1.95	0.55	0.87	0.66	0.55	0	0	0.02	0	0	0.03	0	0
Angpt1	0.13	0.13	0.46	0.36	0.26	0.41	0.71	0.32	0.96	0.88	0.93	0.78	0.36	0.3	0.26	0.36	0.13	0.04	0.1	0.17	0.32	0.36	0.89	0.2	6.66	8.69	7.73	7.6
Cdh10	0.06	0	0	0.02	0.41	0.2	0.18	0.26	0.05	0.02	0	0	0	0	0	0.13	0.03	0.03	0.09	0	0.06	0.05	0.1	0.15	0.15	0.09	0.08	0.22
Shcbp1	0.16	0.06	0.36	0.27	0.1	0.34	0.36	0.34	0.18	0.51	0.81	0.55	0.3	0.57	0.37	0.29	19.43	20.85	27.21	19.37	0.45	0.43	0.79	0.39	0.46	0.51	0.55	0.35
Rida	4	3.01	6.9	6.92	10.42	11.42	11.37	11.56	9.36	9.83	9.86	10.23	4.33	4.99	4.74	5.02	0.42	0.41	0.4	0.49	26.2	26.68	18.72	27.88	11.12	9.16	10.58	10.44
Myc	2.44	1.57	1.81	2.06	2.39	2.62	2.42	1.54	10.67	12.98	10.86	9.33	0.99	1.44	1.41	1.22	0.28	0.15	0.23	0.25	4.17	3.78	3.05	3.31	2.12	2.57	2.65	2.63
A1bg	0	0	0.03	0.07	0.35	0.07	0.18	0.15	0.08	0	0	0	0	0	0.07	0	0	0.03	0	0.03	0.16	0.1	0.06	0.18	0.62	0.22	0.34	0.33
Fbxo32	9.55	4.25	12.31	9.49	4.05	4.38	4.21	2.88	7.02	6.57	6.39	6.26	10.27	10.39	11.48	10.14	0.56	0.47	0.48	0.51	21.9	21.32	22.3	19.7	50.01	56.46	57.68	61.88
Tbc1d31	2.55	1.17	3.16	3.22	1.33	0.99	1.46	1.45	3.89	3.23	5.34	3.56	3.68	3.97	3.65	3.31	22.62	21.23	23.11	24.14	1.86	1.3	2.81	1.53	3.52	3.54	3.23	3.69
Has2	0.08	0.09	0.23	0.11	0.41	0.46	0.61	0.31	0.53	0.69	0.53	0.35	0.21	0.05	0.1	0	0	0	0.01	0.01	1.2	1.45	1.35	0.86	1.32	0.94	0.76	0.62
Mtbp	2.49	1.19	2.6	2.43	1.41	1.56	2.84	1.74	3.25	2.42	4.84	3.75	2.47	2.79	2.67	1.8	16.44	17.19	20.78	16.81	2.4	2.11	2.45	2.47	2.22	2.73	2.29	3.38
Asap1	4.99	2.85	5.36	4.41	3.56	3.39	4.19	2.38	11.69	11.64	12.12	11.6	5.92	6.13	5.94	5.48	36.43	32.9	33.64	34.49	5.35	5.49	8.85	4.77	5.99	6.61	5.42	6.18
Wnt7b	8.48	2.12	5.78	4.91	4.66	3.88	2.66	1.95	2.82	2.25	1.91	2.31	7.77	8.02	9.4	6.21	0.05	0.09	0.06	0.12	37.13	33.33	19.72	34.94	20.55	20.55	24.45	21.07
Gtse1	0.89	0.36	0.41	0.54	0.54	0.46	0.71	0.41	0.75	0.83	0.96	0.91	1.05	0.71	0.65	0.98	5.19	5.35	5.38	5.32	0.8	0.93	0.97	0.8	1.15	0.61	1.09	1.08
Ttll8	0.46	0.21	0.23	0.43	1.28	1.2	1.18	0.8	7.74	7.69	9.48	7.53	0.61	0.73	0.58	0.3	76.79	66.75	75.2	69.12	1	0.97	0.57	1.08	0.08	0.16	0.02	0.33
Syngr1	0.68	0.44	0.46	0.25	0.15	0.09	0.21	0.12	8.01	6.74	7.61	8.32	0.74	0.68	0.73	0.98	0.46	0.31	0.53	0.34	0.27	0.15	9.03	0.2	0.68	0.64	0.86	0.84
Cacna1i	0.05	0	0.03	0.06	0.03	0.01	0.02	0	0.05	0.01	0.03	0.01	0.01	0.01	0.01	0.01	0.75	0.74	0.8	1.04	0.03	0	0.01	0.01	0.14	0.1	0.05	0.05
Deptor	2.54	1.19	1.98	2.17	2.72	2.3	3.4	2.33	21.24	20.79	21.39	23.19	2.55	2.45	2.72	2.13	1.03	0.93	1.09	1.4	3.18	2.88	3.9	2.88	5.88	7.36	6.68	7.61
Dscc1	0.14	0.02	0.12	0.18	0.12	0.11	0.19	0.17	0.52	0.2	0.55	0.79	0.23	0.23	0.56	0.21	1.85	2.2	2.87	1.57	0.11	0.09	0.31	0.1	0.13	0.06	0.04	0.32
Enpp2	21.23	7.12	41.09	21.08	58.71	65.19	82.2	61.19	22.69	23.48	24.31	24.07	262.26	276.18	267.62	227.76	7.02	7.23	7.23	7.09	44.83	54.73	38.36	53.03	109.45	107.04	122.2	139.62
Dmc1	0.46	0.07	0.24	0.59	0.29	0.23	0.13	0.08	1.43	0.75	1.37	1.49	0.38	0.16	0.14	0.17	7.99	7.8	6.38	8.14	0.16	0.05	0.05	0.18	0.52	0.3	0.31	0.55
Upk3a	0.43	0.14	0.05	0.75	0.12	0	0	0.1	0	0.06	0	0	1.2	0.67	0.72	0.4	0	0	0.05	0	0.16	0.11	0.19	0.05	0	0.06	0	0.07
Parvg	0.77	0.28	0.69	0.45	0.55	0.44	1.17	0.51	0.91	0.98	1.14	0.92	1.06	0.91	1.02	0.75	12.81	13.39	11.64	14.8	1.03	0.85	7.38	0.93	1.26	1.01	0.83	0.7
Efcab6	0.46	0.18	0.27	0.29	0.18	0.61	0.6	0.41	6.55	6.12	9.02	5.69	0.85	1.08	0.44	0.38	84.08	85.2	81.3	86.75	0.53	0.68	0.34	0.77	0.05	0.01	0.02	0.06
Adamts20	0.09	0.02	0.15	0.1	0.02	0.08	0.08	0.05	4.95	4.62	5.46	5.91	0.27	0.27	0.36	0.07	0.78	0.97	1.3	1.05	0.13	0.23	0.27	0.2	0.84	0.62	0.59	0.43
Nell2	0.55	0.18	0.19	0.32	0.52	0.32	0.21	0.2	1.2	1.79	1.6	1.99	0.15	0.07	0.2	0.02	9.3	7.88	9.48	10.03	0.16	0.1	0.27	0.17	0.3	0.42	0.22	0.13
Wbp2nl	0.95	0.06	0.48	0.97	0.59	0.66	0.59	0.5	0.31	0.25	0.73	0.15	0.27	0.78	0.28	0.05	73.19	72.55	69.29	71.32	1.75	1.38	0.88	1.28	2.29	1.92	1.88	3.08
Slc38a4	5.75	1.92	5.74	6.25	35.99	42.21	48.65	37.38	21.13	18.56	22.6	21.01	1.71	2.09	1.57	2.4	0.11	0.23	0.17	0.2	55.82	50.29	37.98	57.32	4.54	3.9	4.51	5.19
Desi1	12.2	6.27	11	11.39	11.24	11.88	11.59	7.21	9.32	9.17	9.96	8.9	13.95	15.39	14.33	12.97	92.07	86.9	86.78	77.25	15.58	13.95	11.91	12.89	17.46	16.69	16.45	17.53
Hoxc10	0.09	0.04	0.09	0.13	0.74	1.01	1.33	0.64	0	0	0.07	0	0	0	0	0	0.03	0	0.09	0	1.3	1.63	1.83	1.14	0.53	1.12	0.49	0.2
Gtsf1	0.29	0.47	1.06	0.16	1.73	1.83	1.76	1.69	0.08	0.08	2.97	0.08	1.03	1.26	0.22	0.54	149.69	150.47	178.65	156.64	2.09	3.29	1.81	2.67	0.08	0.08	0	0.55
Ppp1r1a	0.05	0	0.04	0.05	0.1	0	0.25	0.04	1.31	2.33	0.64	1.84	0.05	0	0.05	0	0	0	0.08	0	0.18	0.09	0.12	0.13	0.48	0.61	0.57	0.29
Litaf	24.25	8.09	33.84	17.34	27.56	25.65	32.67	18.73	14.22	14.32	12.59	13.46	203.47	184.44	192.13	167.91	6.2	6.05	5.58	6.48	22.67	21.41	65.59	19.88	31.52	34.05	31.79	34.7
Prm1	33.29	10.25	33.78	39.67	30.16	39.01	39.08	23.67	26.82	22.13	78.3	24.71	33.27	67.86	17.7	37.61	4886.1	5182.77	5504.72	4907.91	79.92	61.32	45.78	70.24	11.65	0.43	3.44	19.53
Ciita	0.78	0.42	0.4	0.32	1.42	1.14	1.91	0.61	7.4	7.34	7.39	6.33	0.77	0.69	1.07	0.42	0.06	0.08	0.02	0.06	1.86	1.44	3.77	1.02	2.21	2.32	1.93	1.67
Trp63	9.7	6.75	15.38	13.76	6.29	7.51	9.27	8.2	0.11	0.22	0.25	0.25	28.38	28.78	27.39	21.3	0.57	0.31	0.47	0.42	6.69	6.47	6.76	6.14	10.27	9.02	9.15	10.96
Hrasls	0.22	0.05	0.22	0.77	0.09	0.21	0.3	0.17	13.88	11.81	14.06	13.64	0.79	1.06	0.9	0.46	29.6	33.18	32.7	31.57	0.45	0.18	0.25	0.35	0.84	0.43	0.72	1.08
4930451G09Rik	2.58	1.52	2.53	2.15	1.84	1.3	2.56	1.45	3.59	3.33	3.39	3.45	0.98	0.62	1.27	0.92	27.8	25.03	27.84	25.11	2.09	2.55	1.34	2.36	1.76	1.69	1.72	1.29
Naprt	2.54	0.52	1.69	2.04	1.9	1.29	1.85	1.2	10.67	12.14	10.32	10.75	1.3	1.63	1.52	1.77	0.61	0.49	0.72	1.03	3.03	2.17	2.01	2.31	2.99	2.75	2.63	3.14
Ly6h	0.08	0.05	0.21	0.07	0.07	0.07	0.06	0.1	4.86	4.74	3.81	3.49	0.15	0.18	0.13	0.05	0.04	0	0.08	0	0.02	0.08	0.08	0.02	0	0	0	0
Rhpn1	39.6	12.12	26.45	29.63	5.85	5.56	7.63	2.61	5.75	5.79	6.11	5.75	7.12	6.67	7.4	6.14	9.43	10.54	9.64	9.83	0.52	0.47	0.55	0.32	1.52	1.2	1.95	1.41
Ly6c2	0.11	0.03	0.04	0.07	0.17	0.21	0.29	0.08	1.05	1.41	0.88	0.92	0.26	0.11	0.14	0.09	0.04	0	0	0	0.49	0.55	1.46	0.25	0.14	0	0.21	0.25
Ly6e	144.25	73.91	121.22	136.69	523.42	513.92	500.38	392.04	134.93	171.65	125.82	151.3	166.55	148.58	142.85	141.8	11.17	11.61	7.54	8.86	1055.82	1058.07	543.78	885.9	429.1	421.45	409.75	555.46
Gm9747	0	0.05	0.04	0.09	0	0	0	0	0.1	0.14	0.05	0.05	0.02	0.04	0	0	0	0	0	0	0	0	0	0	0.02	0	0.02	0
Lynx1	1.81	0.47	1.33	1.08	1.69	1.52	1.61	1.08	14.84	16.2	15.17	15.05	1.44	1.22	1.88	1.41	0.43	0.79	0.65	0.91	4.89	3.29	2.97	3.55	8.69	7.33	7.11	7.41
Lypd2	0	0	0	0	0.13	0.12	0	0	1.87	1.55	0.5	0.89	0	0	0	0	0	0	0	0	0.12	0	0	0	0	0.26	0	0.15
Arc	0.47	0.3	1.82	0.48	0.32	0.69	0.76	0.69	0.96	0.32	4.27	0.64	0.66	1.42	5.67	3.79	70.21	67.92	68.29	69.24	0.56	0.73	0.62	0.97	0.27	0.2	0.18	0.32
Mroh4	0.53	0.02	0.53	0.18	0.74	1.06	1.51	0.79	0.86	0.55	5.04	0.4	0.61	1.42	0.41	0.44	196.06	189.2	201.63	204.48	0.84	1.1	0.87	1.41	0.04	0	0.16	0.27
Tymp	0.15	0.07	0.31	0.09	0	0.06	0	0.03	18.49	16.39	17.4	15.25	0.52	0.42	0.93	0.56	0.19	0.15	0.08	0.17	0.09	0	0	0	0.06	0	0.03	0
Mapk8ip2	0.16	0.03	0.08	0.15	0.09	0.22	0.26	0.11	0.2	0.14	0.53	0.11	0.09	0.11	0.08	0.11	17.29	17.79	15.38	18.56	0.2	0.19	0.12	0.29	0.15	0.06	0.07	0.09
Arsa	7.04	2.32	4.99	5.47	5.62	4.49	5.68	3.1	7.87	6.53	8.63	7.38	1.34	1.67	1.12	2.84	65.98	62.22	65.85	69.39	9.5	9.95	7	7.84	18.75	18.53	19.67	16.51
Shank3	2.06	0.65	1.71	1.05	1.18	1.5	1.61	0.53	9.35	10.26	10.43	8.77	4.15	3.03	4.91	2.81	0.4	0.25	0.44	0.43	1.23	0.96	2.22	0.92	5.46	4.83	4.08	3.29
Alcam	24.29	11.74	23.34	33.15	6.28	6.34	7.36	6.42	2.75	3.08	2.83	2.44	7	7.19	7.53	7.15	0.87	0.73	0.88	0.74	7.25	6.81	11.63	7.21	6.74	7.88	6.46	6.77
Retnlg	0	0	0	0	0.32	0.21	0.46	0.09	0.11	0	0	0.11	0	0.09	0.1	0	0	0	0	0	1.17	0.39	2.78	1.57	0	0	0	0
Nectin3	0.82	0.37	1.02	0.99	0.95	1.33	1.13	1.03	4.29	3.93	5.48	5.31	0.91	1.32	1.21	0.89	46.98	48.45	48.84	49.74	2.72	1.87	2.07	2.57	1.63	1.76	1.82	1.62
Cd96	0.03	0.17	0.08	0.09	0.09	0.17	0.23	0.15	0.06	0.06	0.09	0.09	0.06	0.29	0	0.03	5.95	5.37	6.18	5.63	0.14	0.13	0.36	0.18	0.11	0.21	0.2	0.1
Ccdc80	2.17	1.41	3	2.92	5.01	8.18	11.95	5.16	33.45	35.3	28.25	40.42	2.13	1.7	2.93	2.12	0.31	0.4	0.88	0.39	8.71	8.31	15.3	8.33	19.45	22.78	18.97	18.8
Mzt2	8.72	2.21	4.65	5.83	8.88	8.21	9.04	5.07	8.19	8.62	7.73	7.74	4.12	4.25	3.71	3.24	55.77	58.44	63.29	56.15	7.14	7.41	5.42	5.09	5.76	7.02	5.52	7.11
B3gnt5	0.1	0.05	0.07	0.07	0.01	0.1	0.11	0.1	0.13	0.03	0.09	0.01	0.06	0.01	0.01	0.14	0.01	0	0.01	0.02	0.11	0.19	0.18	0.08	0.71	0.73	0.57	0.45
Sidt1	0.23	0.07	0.13	0.17	0.25	0.21	0.36	0.15	0.12	0.05	0.06	0.03	0.02	0	0.06	0.04	0.11	0.08	0.06	0.05	0.04	0.05	0.38	0.1	6.26	6.65	6.44	6.87
Drd3	0.08	0	0.16	0.13	0	0	0	0	0	0.09	0	0	0.58	0.51	0.38	0.52	0.04	0.11	0	0	0.12	0	0	0.08	0.04	0.14	0.13	0.15
Crybg3	3.02	1.52	3.33	2.66	2.72	2.97	3.97	2.96	5.37	5.64	7.28	6.06	2.42	3.55	3.59	3.42	56.53	50.02	42.78	62.06	5.76	5.45	7.69	6.37	12.1	11.28	11.58	11.54
Tmem30c	0.1	0.07	0.28	0.2	0.02	0.05	0.1	0.03	0.04	0.06	0.26	0.07	0.2	0.28	0.11	0.25	19.37	19.19	19.46	21.54	0.12	0.1	0.15	0.11	0.05	0.06	0.07	0.04
Adgrg7	0.37	0.17	0.28	0.12	3.05	5.69	5.83	3.17	0.05	0.05	0.07	0.1	0	0.04	0.18	0.21	1.03	1.06	1.25	1.29	41.81	37.32	32.54	41.86	27.16	31.45	26.93	34.9
Slc7a4	37.61	5.35	20.04	22	126.59	106.41	124.44	71.19	10.98	9.23	9.81	8.39	21.6	23.32	21.67	24.91	7.78	7.74	9.43	9.01	117.22	117.23	68.46	106.73	28.69	22.54	23.26	24.4
P2rx6	3.69	1.47	2.8	3	2.59	2.75	3.54	2.24	13.32	13.49	13.43	12.26	1.3	1.12	1.37	1.94	0.6	0.61	0.66	0.75	2.41	2.34	1.63	2.07	3.9	3.31	3.72	3.4
Lrrc74b	7.24	2.19	5.83	4.69	2.97	3.55	5.34	2.95	74.86	71.72	77.19	73.61	4.8	5.22	5.69	4.25	0.29	0.23	0.17	0.5	4.8	5.17	3.7	3.99	0.53	1.02	0.64	0.57
Ncam2	0.01	0.02	0.04	0	0.09	0.05	0.05	0.07	0	0.05	0	0.03	0.01	0	0	0.01	0.04	0.03	0.04	0.02	0.08	0.11	0.03	0.06	1.13	0.7	1.03	1.01
Serpind1	0	0.1	0.11	0.2	0	0	0.03	0	0	0	0.06	0	0	0.03	0.08	0	0	0	0	0.03	0	0	0	0	0.14	0.03	0.06	0
Ccdc116	0.37	0.16	0.45	0.53	0.32	0.39	0.39	0.41	0.34	0.27	1.5	0.39	0.2	0.42	0.19	0.15	38.45	44.89	47.79	35.98	0.24	0.33	0.23	0.49	0.34	0.52	0.32	0.21
Ypel1	1.55	0.46	1.4	1.22	0.77	1	0.98	0.65	1.96	1.59	3.12	1.22	0.82	1.29	0.61	0.69	94.9	95.45	96.97	96.1	1.01	0.88	1.1	1.53	0.59	0.68	0.64	0.57
Meltf	0.3	0.07	0.11	0.12	0	0.02	0	0.01	1.09	1.34	1.35	1.26	0.07	0.01	0.03	0.03	2.75	2.64	2.92	2.77	0.01	0.07	0.06	0.07	0.06	0	0	0.02
Spag6l	0.74	0.28	0.72	0.29	0.45	0.96	0.87	0.69	42.36	39.11	43.19	41.26	3.82	4.56	4.45	3.09	140.18	133.16	127.66	139.43	1.05	1.26	0.55	1.32	0.05	0.06	0.05	0.16
Wdr53	4.47	2.19	3.25	3.77	3.97	4.52	4.61	2.89	3.48	3.65	4.13	4.34	4.57	3.85	3.9	3.81	20.71	21.57	21.76	22.14	4.03	3.66	3.22	3.9	4.86	4.35	3.38	2.91
Arhgap31	15.18	6.48	14.67	10.89	2.97	3.45	3.58	1.72	4.47	5.11	4.76	4.82	28.85	30.28	30.02	26.86	3.46	3.43	3.77	3.76	7.36	6.99	11.59	6.88	9.97	9.51	8.58	8.06
Popdc2	2.44	0.63	2.6	2.16	1.93	1.38	1.35	0.61	1.32	1.89	2.04	2.07	1.81	0.95	1.43	1.57	0.28	0.38	0.45	0.44	5.48	4.54	3.12	4.03	9.23	11.38	12.07	10.87
Nr1i2	0.07	0.03	0	0	0	0	0	0	1.82	2.85	1.95	3.06	0.19	0.11	0.1	0.07	0.34	0.2	0.19	0.28	0	0	0	0	0	0	0	0.03
Hgd	0.07	0	0.1	0.04	0.04	0.04	0.13	0.06	0.28	0.19	0.38	0.34	0.16	0.1	0.07	0.04	0.64	0.6	0.54	0.56	0.1	0.07	0.03	0.07	0.07	0.08	0.07	0.04
Muc13	0	0	0.08	0.02	0	0	0	0	0.3	0.36	0.26	0.2	0	0	0	0.06	0.04	0.03	0.04	0.02	0	0	0.05	0	0.02	0.02	0	0
Stxbp5l	0.07	0.02	0.05	0.04	0.09	0.09	0.04	0.03	0.05	0.12	0.26	0.07	0.06	0.07	0	0.07	2.93	2.18	3.35	3.71	0.09	0.12	0.19	0.18	0.17	0.27	0.07	0.22
Ropn1	0.41	0	0.13	0.15	0.15	0.86	0.32	1.07	0.31	0.15	4.39	0.07	1.6	2.02	0.56	0.58	220.62	230.75	251.73	229.04	1.08	1.27	0.97	1.28	0	0	0	0.17
Ccdc14	1.88	0.63	1.87	1.56	0.97	1.22	1.31	0.75	3.25	2.69	3.4	2.98	1.33	1.64	1.58	1.66	9.98	10.48	9.64	11.53	1.67	1.33	2	1.28	2.32	2.37	1.69	1.94
Mylk	45.55	20.08	46.29	39.41	35.56	29.81	36.68	21.5	94.6	89.8	87.56	95.23	84.54	75.96	90.72	61.2	9.42	8.73	8.57	11.14	91.04	106.32	76.39	90.46	592.15	611.15	633.23	550.17
Adcy5	9.39	2.14	6.34	5.03	4.38	4.15	4.73	2.16	14.19	13.02	13.82	13.36	2.53	2.95	4.08	3.74	1.14	0.99	1.08	1.44	11.26	12.31	8.74	11.24	38.3	35.32	40.63	28.19
Thpo	1.01	0.09	0.37	0.49	3.83	4.12	4.59	2.84	19.25	19.97	18.31	17.61	0.98	0.43	0.82	0.66	0.06	0.27	0.22	0.07	0.31	0.34	0.28	0.49	0.7	0.58	0.4	0.18
Ehhadh	10.17	3.66	9.52	8.42	7.75	6.93	9.36	5.11	2.72	2.06	2.16	2.8	5.03	6.85	5.1	7.62	0.71	0.73	0.54	0.59	10.85	9.78	8.62	10.3	32.98	39.74	38.24	32
Senp2	10.09	4.22	10.5	11.78	10.42	10.88	12.2	8.88	6.94	6.32	8.35	7.48	9.87	11.55	10.31	10.41	59.53	53.04	57.08	60.39	10.78	11.05	9.91	10.3	13.83	11.79	12	11.78
Chodl	0.07	0	0.09	0.15	0.15	0	0.07	0.02	0.16	0.05	0.05	0.05	0	0.02	0	0.07	0.06	0.22	0.06	0.09	1.14	0.69	1.15	1.04	2.18	2.16	2.08	2.34
D16Ertd472e	2.25	1.24	2.79	2.82	2.65	2.29	2.14	1.73	1.62	1.81	1.77	1.62	2.03	3.19	2.44	2.32	23.18	25.2	26.31	23.88	3.21	2.82	2.85	3.43	2.92	2.66	1.9	2.48
Fetub	5.13	2.96	8.41	4.89	3.88	6.31	5	4.99	0.39	0.08	0.16	0.46	21.26	20.56	16.57	17.12	0.59	0.94	0.17	0.41	7.71	7.07	4.61	8.33	5.15	5.09	5.48	7.4
Adipoq	0.28	0.12	0.63	0.2	1.64	6.33	11.44	3.33	33.12	42.99	32.63	55.39	0.38	0.09	0.52	0.2	4.1	4.04	5.39	3.25	3.02	0.68	0.12	0.22	10.74	19.57	7.88	2.91
Rfc4	2.23	0.6	2.45	2.21	2.56	2.83	2.86	2.63	2.25	2.27	3.35	2.29	2.57	2.5	1.96	1.78	17.23	18.42	20.48	18.26	3.61	2.66	2.73	2.93	2.16	2.76	2.57	3.05
St6gal1	403.18	171.22	319.62	414.15	7.08	9.05	5.89	5.04	5.17	5.15	4.91	6.05	27.28	32.12	28.48	39.31	3.34	3.54	3.41	3.84	23.04	20.04	16.5	20.87	6.94	6.88	6.62	6.37
Mrpl39	6.26	5.62	9.79	8.98	6.56	7.16	7	5.54	12.93	12.8	13.19	13.11	8.42	10.24	8.89	9.18	46.12	47.8	48.8	44.3	5.49	5.59	5.97	6.4	6.19	6.89	5.27	5.7
Adamts5	1.97	0.9	3.16	2.55	2.84	2.73	4.04	2.37	15.92	14.31	16.94	11.87	2.22	2.33	3.62	2.13	2.02	1.91	1.82	2.13	2.97	2.66	3.8	2.8	3.91	3.99	4.01	2.75
Grik1	0.02	0	0	0.05	0	0.02	0.03	0.03	0	0	0	0	0.06	0	0.05	0.03	0.19	0.18	0.42	0.18	0	0.03	0.04	0	0	0	0.05	0.02
Fam3b	0	0.52	0.13	0.22	0	0.28	0.63	0.31	0.16	0.08	1.16	0	0.08	0.45	0.14	0.07	22.38	21.19	19.24	17.87	2.42	2.86	1.2	3.44	0.36	0	0	0.17
Clic6	2.89	1.44	2.58	2.56	1.51	1.79	1.44	1.19	48.26	49.53	48.92	54.55	2.9	3.3	4.37	2.41	0.91	1.54	1.01	1.18	2.64	2.84	3.01	2.85	0.69	0.2	0.4	0.34
Runx1	15.7	5.43	15.21	11.34	1.06	1.11	1.41	0.88	5.45	5.74	5.47	6.57	65.02	54.36	61.56	50.72	0.24	0.1	0.21	0.17	1.57	1.51	6.07	1.48	1.92	1.56	1.98	1.47
Donson	1.34	0.52	1.54	1.94	1.68	1.61	1.76	1.18	2.89	2.64	3.89	3.59	2.03	2.14	1.38	1.88	23.1	22.51	27.91	26.65	1.41	1.98	2.64	1.51	2.45	2.71	2.55	2.45
Il10rb	5.08	2.92	5.61	4.67	2.1	2.28	3.07	1.66	6.69	7.18	6.56	6.28	15.67	13.92	17.91	14.2	1.43	0.97	1.31	1.38	2.97	2.71	10.67	2.25	3.64	4.23	3.69	4.2
1110004E09Rik	6.02	5.54	5.79	6.17	7.48	7.81	9.25	5.94	19.92	17.93	20.88	20.34	5.51	6.95	6.35	5.31	56.47	60.67	51.31	57	6.72	6.3	3.7	5.49	2.69	2.16	2.55	2.23
Zfp641	1.52	0.51	1.38	1.1	0.78	0.68	0.93	0.34	2.34	3	3.33	3.45	0.43	0.41	0.7	0.68	0.34	0.3	0.35	0.52	3.66	3.34	2.46	3.67	7.26	6.4	6.87	6.03
4930415O20Rik	0.53	0.27	0.1	0.69	0.46	0.22	0.6	0.4	2.21	2.13	2.41	1.4	0.25	0.41	0.87	0.34	41.26	39.65	47.53	38.99	1.38	0.52	0.47	0.8	0.45	0.12	0.11	0.13
Lmbr1l	9.92	1.89	5.03	5.56	7.42	6.79	8.02	4.51	10.41	9.57	11.62	8.59	4.45	3.9	4.72	3.42	50.43	50.25	54.43	57.98	10.98	9.13	9.01	7.54	11.19	10.84	11.71	9.14
Dhh	0.1	0.13	0.22	0.05	0.11	0.08	0.09	0.16	0.2	0.36	0.3	0.14	0.3	0.24	0.28	0.29	3.99	4.03	4.38	4.65	0.13	0.35	0.11	0.12	0.58	0.31	0.53	0.29
Faim2	16.88	3.95	7.15	10.28	28.83	26.68	28.17	15.23	4.19	3.45	2.32	2.02	0.22	0.09	0.08	0.21	0.16	0.09	0.14	0.03	1.43	1.75	1.33	1.25	0.63	0.62	0.74	0.63
Aqp2	0.13	0	0.08	0.05	0.32	0.31	0.27	0.23	3.48	2.66	3.52	3.49	0.1	0.16	0.22	0.13	2.5	3.87	4.04	2.55	0.25	0.45	0.19	0.16	13.39	20.25	17.97	27.95
Racgap1	0.93	0.2	0.8	0.76	0.95	0.91	0.98	0.63	0.99	1.21	1.8	1.27	1.24	1.09	1.43	0.96	13.55	12.74	14.05	13.14	1.15	0.97	1.69	1.14	1.56	1.15	1.65	1.54
Soat2	0.32	0.14	0.08	0.12	0.64	0.42	0.58	0.4	1.02	1.11	1.56	1.18	0.09	0.05	0.28	0.06	0	0.05	0	0.11	0.24	0.24	0.33	0.33	0.45	0.18	0.28	0.41
Tarbp2	7.02	2.07	4.06	4.53	5.34	3.75	5.55	3.32	5.28	5.18	6.86	4.27	3.35	3.07	3.44	3.54	32.37	33.71	33.13	33.56	6.43	5.57	5.87	4.65	6.83	6.66	6.7	5.47
Sncg	0.07	0.27	1.16	0.15	1.36	2.57	3.31	0.71	24.31	37.02	24.03	29.04	2.05	0.6	0.64	0.82	0.06	0.06	0	0	2.29	0.69	0.99	0.79	0.66	1.88	0.73	0.35
Rgn	6.65	3.47	8.31	9.42	23	19.62	27.01	20.55	4.3	3.66	3.78	4.34	0.57	0.89	0.46	1.57	0.14	0.06	0.07	0.18	12.88	13.38	9.77	13.98	0.55	0.54	0.81	0.65
Slc10a2	0	0.02	0	0	0	0	0.04	0.04	0	0	0	0.02	0	0	0	0	0.38	0.32	0.25	0.4	0	0	0	0.01	0	0	0	0
Mospd1	41.17	13.57	48.37	33.16	2.16	2.35	2.36	2.26	5.41	5.49	5.56	5.48	10.36	14.01	11.44	19.76	1.5	1.67	2.23	2.85	3.68	3.62	6.14	2.96	7.43	8.27	8.95	7.88
Rfc2	4.82	1.95	3.52	3.9	4.38	3.71	4.1	2.8	9.76	9.77	11.22	8.88	4.65	4.42	5.41	4.21	28.91	27.67	32.02	27.72	4.51	4.19	5.55	4.13	4.9	4.23	4.31	3.35
Lrrc69	0.29	0.06	0.23	0.15	0.31	0.45	0.58	0.31	0.33	0.05	0.72	0.16	0.23	0.46	0.39	0.1	38.18	40	35.95	38.13	1.05	1.18	0.77	0.68	0.35	0.05	0.3	0.24
Psg29	0	0	0	0	0	0	0	0	0	0	0.01	0	0	0	0	0	0.05	0.07	0.04	0.02	0	0	0	0	0	0	0	0
Slc38a1	1.27	0.44	1.2	0.74	0.65	0.39	0.59	0.43	10.66	10.17	10.32	11.47	2.46	2.33	1.89	2.72	0.29	0.37	0.48	0.48	2.72	3.41	5	2.59	11.6	12.82	12.56	13.12
Grm2	0	0	0	0	0	0	0	0	0	0	0.01	0.01	0	0	0	0	0.05	0.1	0.08	0.06	0	0	0	0	0	0	0	0
Lcn9	388.22	139.2	908.8	394.34	1.69	0	0	0	0.33	0	0	0	7299.27	7709.85	7281.08	5942.65	0	0.06	0	0.14	0.14	0.35	0.57	1.2	0	0	0	0
Serinc2	16.38	3.45	16.26	11.02	2.77	2.29	3.27	1.15	10.94	10.72	9.52	10.73	151.19	124.85	156.45	109.4	4.5	3.73	3.65	4.84	2.17	2.15	2.02	1.82	3.44	1.91	2.11	2.63
Guca2a	0	0	0	0	0	0	0.19	0	0	0	0	0	0	0	0.1	0	0.64	0.17	0.37	0.3	0	0	0.09	0.38	0	0	0	0.13
Cypt1	0.18	0	0.17	0.1	0.1	0.46	0.49	0.41	0	0.1	1.24	0	0.42	0.34	0.36	0.28	124.22	139.94	134.03	135.13	0.88	0.78	0.63	1.25	0	0	0	0.22
Frs3	2.35	0.39	1.19	1.83	1.47	1.25	1.37	0.9	4.88	5.12	5.58	4.62	1.04	1.31	1	1.09	11.73	12.21	11.84	10.53	1.68	1.56	1.26	1.75	2.46	1.77	1.68	1.89
Gabrr2	0.03	0.2	0.24	0	0.07	0.06	0.11	0.06	0.07	0.1	0.26	0	0	0	0.06	0.07	0.11	0.42	0.17	0.09	1.01	0.67	0.27	0.84	0.1	0.14	0.13	0.12
Bmp15	0.14	0.07	0.4	0.25	0.25	0.29	0.09	0.29	1.25	1.36	1.38	1.77	0.59	0.86	1.06	0.52	0	0.03	0.02	0	0.21	0.33	0.35	0.24	0.18	0.28	0.14	0.12
Poc1a	1.88	0.65	1.37	1.1	1.71	1.47	1.94	0.95	2.25	2.35	3.04	2.17	1.41	1.17	1.28	1.22	15.62	14.29	16.59	15.89	1.7	1.85	1.83	1.75	1.91	1.17	1.75	1.73
Slc17a9	55.16	17.1	45.08	30.17	13.25	11.64	21.81	6.7	4.63	3.14	2.92	3.03	110.19	107.3	116.29	103.79	5.37	4.59	4.64	4.65	12.94	12.05	10.93	7.93	4.64	2.93	4.42	3.43
Nfatc4	4.1	0.89	2.32	2.41	2.25	2.58	2.38	1.17	11.43	11.75	10.08	10.23	1.91	1.89	3.17	2.34	0.25	0.27	0.38	0.38	6.06	5.62	6.28	4.51	20.76	19.74	21.91	16.13
Cela3b	0	0	0	0	0	0	0	0	0	0	0	0.2	0	0	0	0	0.22	0.42	0.73	0.36	0	0	0.05	0.06	0.13	0.34	0.06	0
Pisd	23.77	11.57	21.31	22.23	4.23	5.7	4.98	2.83	7.83	8.09	7.84	7.4	5.4	7.21	6.5	7.32	2.43	3.24	3.48	3.01	5.27	5.86	9.08	4.7	5.37	4.65	3.86	4.77
Tulp2	1.02	0.92	0.73	1.01	1.1	1.89	1.65	1.13	1.68	1.04	7.31	0.82	1.46	2.15	0.99	1.26	248.33	265.28	275.23	248.88	2.09	1.8	1.89	2.37	1.11	0.87	1.04	1.57
Cdca3	1.44	0.85	1.38	1.82	2.73	1.74	1.82	1.54	2.28	1.2	4.08	1.61	2.55	3.35	2.07	1.79	85.13	90.85	91.08	76.26	2.57	2.49	3	2.44	1.14	1.08	1.22	1.22
C1qtnf12	78.59	19.9	56.14	40.69	4.01	2.47	3.45	2.1	16.17	13.93	14.69	14.51	6.01	8.86	8.17	16.63	7.72	8.65	10.44	8.63	5.98	6.01	7.08	6.73	132.69	129.8	167.57	134.36
Iqcf3	2.17	1.66	3.14	4.08	3.48	4.9	5.16	3.61	1.67	1.1	8.25	1.82	1.95	3.59	0.96	1.43	312.48	318.03	282.57	284.82	8.09	8.43	8.62	10.94	1.15	0.06	0.11	1.77
Slc22a3	1.03	0.2	1.04	0.82	0.31	0.48	0.55	0.14	1.89	1.95	1.94	2.12	0.24	0.46	0.73	0.54	0.05	0.03	0.05	0.12	0.57	0.55	0.42	0.53	7.21	8.95	8.93	6.13
Slc22a1	0.06	0	0	0	0	0.03	0.08	0.08	15.22	13.63	16.97	16.33	0.14	0.17	0.55	0.22	0	0.05	0.05	0	0.03	0.03	0	0.08	0.5	0.77	0.59	0.45
Pde10a	0.18	0.05	0.14	0.15	0.25	0.37	0.42	0.41	2.43	2.53	2.77	2.28	0.82	0.59	0.55	0.36	15.51	13.77	13.56	16.24	0.93	0.9	1.04	0.6	15.01	10.88	10.08	8.96
1700010I14Rik	2.5	1.89	2.6	2.94	2.88	3.57	5.14	3.58	3.69	3.32	8.15	3.69	4.08	4.75	3.89	3.07	226.49	227.1	208.65	232.32	4.44	3.03	2.8	2.96	2.71	1.22	1.24	1.78
Cldn6	0.16	0.15	0.66	0.26	0.3	0.25	0.11	0.15	4.18	2.37	1.53	3.03	0.37	0.34	0.2	0.8	0	0	0.04	0	0.12	0.16	0.11	0.07	0	0	0	0
Pkmyt1	3.78	1.35	3.47	2.71	2.02	1.53	2.04	1.35	3.32	4.31	4.93	4.09	2.54	3.03	2.69	2.7	21.89	26.55	28.98	23.63	2.96	2.9	1.97	2.58	2.62	2.62	3.62	2.39
Mep1a	0.66	0.33	0.51	0.39	21.99	17.93	20.02	16.33	1.18	0.82	1.08	1.03	0.02	0.06	0.02	0.04	0.06	0.05	0.02	0.02	2.35	2.07	2.28	3.08	0.02	0	0.02	0
Adgrf4	0.02	0	0.04	0.02	0.06	0.1	0.07	0.18	0.16	0.11	0.23	0.09	0	0.04	0	0.12	0	0.05	0.04	0	0.06	0.17	0.09	0.04	0.39	0.5	0.32	0.34
Cenpq	1.13	0.9	1.46	1.52	2.12	1.61	1.82	1.59	1.27	1.06	1.28	1.34	1.55	2.15	1.51	1.5	8.96	8.89	9.81	9.41	1.95	1.99	2.91	2.28	1.33	1.37	1.21	1.7
Crisp2	5.74	4.08	7.79	11.6	16.81	20.58	17.9	22.28	3.66	2.39	16.86	2.76	4.82	9.66	2.8	4.97	1137.67	1198.56	1204.5	1215.45	50.45	46.68	29.38	53.26	5.59	0.97	1.17	8.09
Efhb	0.11	0.17	0.35	0.48	0.31	0.38	0.94	0.46	12.31	12.55	15.27	13.46	1.29	1.52	1.51	0.69	37.56	39.77	43.59	37.39	0.96	1.01	0.78	0.91	0.14	0.25	0.49	0.62
Spats1	0	0.07	0	0.17	0.17	0.11	0.19	0.19	0.35	0.23	0.72	0.06	0.18	0.15	0.21	0.05	20.65	19.56	22.3	24.11	0.25	0.3	0.09	0.43	0.05	0.11	0	0.19
Slc5a7	0	0	0	0	0	0.01	0	0	0.09	0.05	0.01	0.03	0	0	0.01	0.01	0	0.02	0.01	0	0	0	0	0	0	0	0	0
Clic5	0.7	0.25	0.62	0.52	1.42	1.74	1.42	0.99	11.26	10.64	11.6	11.61	1.59	1.66	2.01	1.18	0.15	0.28	0.21	0.19	0.64	0.78	0.57	0.46	1.99	1.99	1.67	1.66
Enpp5	270.33	139.86	283.4	344.15	102.66	111.35	114.05	102.67	47.74	42.27	48.74	46.58	37.71	47.17	37.68	73.07	6.12	6.38	5.88	7.1	55.26	53.34	40.64	54.07	44.71	44.45	42.57	46.8
Calcr	0.05	0.04	0.03	0.05	0.05	0.05	0.16	0.16	0	0	0	0	0	0.03	0.02	0	0	0.01	0	0	0.02	0.02	0.01	0.03	0	0	0	0
Rsph9	2.15	0.47	1.14	1.86	1.2	1.16	1.26	1.26	15.29	14.3	13.64	12.94	2.25	2.19	2.72	2.55	49.87	54.67	57.39	52.75	2.94	2.73	1.37	2.15	11.89	10.01	11.18	11.12
Guca1a	0.2	0.18	0.27	0.44	1.4	0.5	0.51	0.82	0.55	0.83	0.44	0.22	0.32	0.26	0.28	0	3.13	3.53	3.38	4.55	0.95	1.34	2.43	1.22	1.23	0.54	0.57	0.69
Treml1	0.05	0.06	0.05	0	0	0.25	0.09	0.31	0.28	0.11	0.36	0.42	0.11	0	0.15	0.05	0	0	0	0.1	0.05	0.38	1.24	0.18	1.22	0.59	0.5	0.79
Tspo2	0.02	0	0	0.02	0.02	0	0.02	0.04	2.61	2.23	2.01	2.17	0	0.05	0.19	0.06	0	0	0	0	0	0	0	0	0.02	0.06	0	0.05
Cpne5	15.69	4.21	8.44	10.69	30.35	26.98	37.28	20.52	0.25	0.49	0.37	0.36	0.05	0.06	0.06	0.08	3.14	2.42	2.3	3.23	37.6	37.54	20.78	32.87	1.81	1.39	1.54	1.48
Pi16	4.39	1.61	3.88	3.72	12.06	8.52	13.56	6.82	13.03	14	11.93	11.99	3.41	3.7	3.89	3.47	0.99	1.36	1.5	0.91	31.34	27.23	36.42	26.16	12.61	14.56	10.73	12.7
Mtch1	142.1	36.16	106.15	104.51	369.07	286.54	312.81	173.54	99.7	101	93.7	88.08	178.69	186.61	176.01	168.81	9.31	11.35	13.49	12.27	110.28	93.86	99.19	98.55	87.62	76.52	88.62	86.65
Pim1	5.56	1.53	4.14	4.96	8.68	8.24	7.2	4.77	6.61	6.12	5.38	5.38	2.55	2.23	2.15	2.42	31.56	34.42	36.47	37.85	16.59	12.08	17.48	14.16	5.45	3.31	3.5	5.49
Glp1r	0.04	0	0	0	0	0	0	0	3.83	3.17	4.24	4.18	0	0.12	0.16	0.21	0.07	0.21	0.11	0.2	0	0	0.07	0	0.04	0.05	0	0.05
Abcg1	8.01	1.88	6.7	5.26	3.99	3.72	4.62	2.33	6.67	6.45	7.34	6.96	17.98	18.84	19.91	15.97	0.8	0.81	0.68	0.85	5.08	3.63	64.63	4.56	4.68	6.32	5.5	5.16
Rsph1	7.09	9.96	8.93	10.31	5.25	8.32	8.47	6.45	65.31	73.39	75.4	68.47	12.2	15.17	8.91	8.58	350.85	463.22	348.1	424.24	7.52	7.8	4.59	8.09	2.59	2.06	2.24	3.61
Tmprss3	0.04	0.03	0	0	0	0.02	0	0	0	0	0	0.02	0	0	0.02	0.02	0.08	0.07	0.09	0.02	0	0	0	0	0	0	0.04	0
Cbs	2.69	0.61	1.63	1.31	84.35	69.37	97.74	54.48	26.83	25.66	28.8	21.33	2.47	2.33	2.32	1.72	0.09	0.12	0.13	0.09	174.22	164.38	111.32	165.48	3.19	2.83	4	4.03
Myom1	10.86	7	11.44	9.59	6.13	5.5	6.35	4.26	4.15	4.23	4.37	4.14	4.33	5.34	6.1	7.25	1.2	0.81	0.94	1.28	13.41	15.75	12.49	15.56	47	47.42	50.03	44.34
Ndc80	0.19	0.28	0.29	0.2	0.67	0.43	0.68	0.4	0.28	0.27	0.84	0.68	0.83	1.17	0.61	0.6	11.03	12.54	9.4	12.81	0.67	0.61	0.67	0.51	1.23	0.61	0.54	0.96
Clip4	0.91	0.51	0.84	1.06	0.97	1.08	1.38	0.78	12.34	11.36	13.73	13.02	2.02	2.69	1.84	1.78	118.85	114.24	116.48	114.34	1.49	1.99	1.75	1.6	1.35	1.3	1.19	1.09
Lbh	13.1	4.03	14.72	10.11	8.23	5.67	6.34	4.7	41.37	42.6	40.21	41.78	57.15	58.52	60.01	42.77	0.61	0.55	0.39	0.79	6.14	4.97	12.62	4.95	5.47	5.66	5.59	5.17
Galnt14	11.4	3.83	8.99	9.03	0.75	0.61	0.54	0.48	18.02	16.96	15.51	13	5.8	4.89	10.96	4.46	1.06	1.06	0.84	0.93	0.18	0.22	0.34	0.28	1.89	1.43	1.54	1.41
Ehd3	38.98	17.2	32.62	36.18	1.34	1.91	1.21	0.71	5.38	5.42	4.65	5.55	15.3	14.82	18.29	15.14	1.06	1.16	1.37	1.39	1.18	1.36	1.65	0.98	1.67	1.4	1.63	1.23
Qpct	0.8	0.4	1.06	0.9	1.34	0.97	1.67	1.18	1.99	1.89	2.13	1.22	0.8	0.86	0.89	1.58	13.98	13.9	15.51	16.1	1.78	1.7	5.44	1.83	2.28	2.11	2.06	2.34
Themis3	0	0	0	0	0	0	0	0	0.91	1.21	0.64	1.56	0.16	0	0.07	0	0.03	0	0	0	0.03	0	0	0	0	0	0	0
Nrxn1	0.01	0.01	0.02	0.03	0.03	0.03	0.08	0.02	0.05	0.06	0.08	0.06	0.02	0.01	0.01	0	1.34	1.38	1.61	1.43	0.03	0.01	0.02	0.01	0.18	0.19	0.1	0.13
Prss41	0.1	0.13	0.13	0	0.18	0.04	0.1	0.13	0.08	0.08	0.15	0.15	0.8	0.59	0.91	0.69	2.63	2.7	3.03	3.02	0	0.1	0.06	0.06	0.11	0.08	0.25	0.04
Pigf	5.89	2.86	7.4	7.27	12.82	13.34	17.26	16.44	3.46	3.15	4.66	4.48	4.11	6.01	4.2	6.01	67.87	73.51	82.34	65.46	15.68	14.76	11.99	14.46	17.86	16.67	16.89	19.68
Gtf2a1l	0.51	0.24	0.61	0.79	0.71	1.23	1.47	0.95	1.27	0.65	4.26	0.52	0.6	1.3	0.34	0.51	159.75	159.69	170.95	159.77	1.31	2.28	0.85	1.59	0.04	0	0	0.37
Meiob	0.07	0.09	0.34	0.19	0.34	0.26	0.16	0.26	0	0	0.56	0	0.86	0.34	0.61	0.59	11.98	11.28	14.17	11.98	0.31	0.28	0.22	0.3	0.22	0.35	0.58	0.4
Hagh	22.13	8.13	17.25	17.4	26.24	18.35	27.2	15.07	11.02	11.88	13.7	9.68	23.67	23.75	27.31	23.73	114.99	122.61	124.59	112.48	16.98	16.87	14.79	15	19.3	18.09	14.48	15.57
Spsb3	13.36	3.35	9.62	8.8	13.57	11.34	12.24	6.56	11.67	11.09	10.41	10.85	10.54	12.06	11.57	9.4	46.5	49.66	46.57	52.19	13.81	11.31	10.56	10.99	12.85	10.22	12.17	10.98
Ift140	11.71	4.43	8.8	8.44	9.2	9.26	10.99	6.72	18.74	17.69	21.18	17.85	8.37	8.55	9.05	7.5	98.93	99.48	96.76	107.42	10.92	9.96	8.69	9.34	10.48	10.46	10.41	9.49
Tpsab1	0.03	0	0	0	0.13	0	0.09	0	0.11	0.31	0.2	0.17	0	0	0	0	0	0.05	0.03	0.06	0.15	0.15	0.05	0.15	0.52	0.66	0.42	0.43
Tekt4	0.7	0.5	0.64	0.8	2.6	2.53	2.13	1.95	21.24	19.25	23.05	14.62	1.1	1.53	1.43	1.07	113.15	136.81	145.16	121.01	2.97	2.75	1.31	3.47	0.49	0.35	0.2	0.69
Sox8	0.08	0.08	0.25	0.19	0.34	0.29	0.31	0.13	0.48	0.48	0.68	0.46	0.63	0.59	0.94	0.51	5.66	5.62	5.88	5.71	0.67	0.55	0.67	0.43	0.65	0.44	0.64	0.43
Dusp1	3.49	1.32	2.71	1.83	2.33	4.75	2.9	2.32	16.64	22.38	22.15	9.91	3.33	5.24	4.91	3.12	3.44	3.99	3.74	3.45	4.4	5.01	6.68	3.34	78.26	79.04	27.61	9.12
Rfx2	4.04	1.41	2.72	2.72	2.55	2.78	2.96	1.43	24.2	24.41	26.62	22.59	5.09	4.89	4.1	3.41	107.12	100.61	105.61	101.5	3.6	4.05	2.41	3.63	4.49	3.48	2.94	3.22
Acsbg2	1.18	0.79	0.89	1.38	1.82	2.37	1.8	1.86	0.63	0.28	2.97	0.22	0.51	0.61	0.42	0.51	92.04	93.98	96.59	88.44	4.06	3.64	2.51	4.12	0.46	0.08	0.05	0.83
Uqcc2	16.46	3.29	10.82	9.98	26.25	23.38	23.03	13.96	24.44	22	25.23	18.66	19.19	19.81	20.97	19.87	153.43	164.39	189.04	155.13	22.14	18.86	18.33	15.62	13.06	13.15	11.66	13.19
1700061G19Rik	0.11	0.06	0	0.36	0.17	0.33	0.43	0.41	0.31	0.12	2.08	0.12	0.29	0.17	0.07	0.12	51.87	56.63	75.91	52.67	0.42	0.57	0.34	0.73	0.42	0.4	0.67	0.59
Ip6k3	0	0	0.05	0.03	0	0.08	0.02	0	0.5	0.46	0.47	0.73	0.12	0.1	0.05	0.03	0	0.04	0.02	0.05	0.08	0.05	0	0	0.08	0	0.03	0.03
Spdef	1.09	0.55	1.12	1.49	0	0.15	0.08	0.05	0.53	0.77	0.77	0.66	0.24	0.39	0.15	0.24	0.4	0.35	0.55	0.29	0.06	0	0.05	0.03	0.18	0.1	0	0.04
Armc12	1.32	0.35	0.32	0.59	2.14	1.61	1.53	1.73	1.01	0.79	3.25	1.32	1.55	1.85	1.24	0.99	156.93	171.96	177.79	150.71	1.86	2.6	1.95	1.66	0.99	0.49	0.57	0.49
Pdzph1	0.11	0.09	0.06	0.12	0.49	0.25	0.49	0.28	0.07	0.02	0.14	0.03	0	0.03	0	0.05	2.51	2.44	2.65	2.48	0.01	0.06	0.1	0.08	0.02	0	0	0
Abcg8	0.18	0.08	0.19	0.07	0.09	0.14	0.23	0.2	0.28	0.34	0.31	0.43	0.11	0.16	0.05	0.12	1.5	1.24	1.1	1.23	0.13	0.05	0.13	0.05	0.38	0.56	0.74	0.31
Tpgs2	3.08	2.05	2.74	3.05	4.56	4.88	4.37	3.47	2.5	1.84	3.14	2.07	2.54	2.69	2.49	2.26	44.43	47.09	48.06	45.02	5.44	5	4.43	5.24	5.59	5.36	4.94	5.45
Cdh2	0.07	0.09	0.18	0.09	0.23	0.17	0.25	0.23	0.92	0.93	1.04	0.83	0.33	0.55	0.43	0.25	14.93	13.69	12.8	15.15	0.22	0.25	0.52	0.22	0.54	0.51	0.4	0.45
Rnf138	5.17	3.56	9.31	9.06	5.93	6.37	7.12	6.61	3.72	2.89	6.64	4.59	5.78	7.66	5.81	6.83	144.88	156.1	175.08	145.08	11.67	9.87	10.22	11.82	5.61	5.79	5.81	6.62
Dsc2	5.35	2.64	6.29	8.66	13.9	12.27	16.33	12.41	0.04	0.01	0.04	0	1.59	1.81	2.12	2.36	0.09	0.11	0.05	0.06	9.03	6.29	6.88	7.93	2.39	2.95	2.55	2.19
Psd2	0.84	0.1	0.35	0.36	0.21	0.12	0.23	0.08	0.96	0.89	1.33	0.93	0.24	0.07	0.09	0.08	0.21	0.13	0.12	0.23	1.75	1.5	1.23	1.19	0.44	0.49	0.53	0.24
Tmem173	4.85	1.59	4.89	3.26	3.32	2.69	3.03	1.7	4.31	3.96	4.47	3.93	11.79	11	12.99	11.97	0.38	0.49	0.4	0.54	2.49	2.29	6.5	2.17	2.02	2	1.56	2.05
Spata24	16.83	7.85	16.62	12.85	16.41	21.49	20.77	13.4	43.78	44.48	46.92	39.77	16.58	19.99	15.75	13.02	296.36	268.88	278.11	257.4	21.1	19.08	12.83	18.96	6.11	6.3	5.34	7.52
Mzb1	0.98	0.08	0.9	1.49	0.92	0.62	1.47	0.73	10.5	9.79	11.45	12.88	1	1.2	1.01	0.56	0.66	0.74	1.02	0.91	1.37	0.78	0.58	0.68	1.6	1.33	2.13	1.08
Gfra3	0.18	0.04	0.06	0.06	0.19	0.03	0.14	0.11	0.03	0.03	0.16	0.07	0	0.09	0.06	0.06	0.08	0.15	0.16	0.21	0.45	0.32	0.37	0.42	1.92	1.98	2.27	1.47
Proc	2.96	1.12	2.26	2.38	2.18	2.31	1.7	2.22	17.2	15.11	14.91	17.05	0.98	0.73	1.13	0.52	3.28	4.35	3.13	4.64	2.3	2.77	0.81	2.47	2.08	1.11	1.74	2.01
Bag6	64.28	19.24	47.99	43.47	35.33	37.1	41.22	19.94	68.51	67.2	70.71	62.82	59.5	54.18	61.49	53.6	273.7	263.13	272.5	271.36	39.17	38.92	34.52	34.54	58.83	56.05	66.19	49.16
Aif1	1.49	1.74	1.46	1.17	1.62	3.5	4.05	2.15	3.83	3.78	5.7	2.16	4	4.83	2.37	3.4	177.15	182.28	153.47	181.2	3.51	3.21	10.15	2.88	1.36	0.76	1.7	0.94
Atp6v1g2	10.98	7.5	11.69	11.04	2.84	3.52	3.97	2.02	9.63	8.99	8.02	7.72	28.74	24.81	23.09	22.14	3.45	3.37	2.98	3.58	2.36	1.84	2.87	2.98	3	3.72	2.87	3.95
Aqp4	0.08	0.08	0.03	0.09	0.1	0.11	0.09	0.18	6.38	5.82	7.4	6.89	0.44	0.31	0.31	0.24	0	0.01	0	0	0.29	0.3	0.27	0.5	0.02	0.07	0.02	0.01
Cabyr	1.67	0.86	2.37	2.05	6.64	8.44	10.03	7.78	0.61	0.68	2.91	0.28	1.38	1.23	0.49	1.01	143.66	144.89	148.54	118.35	6.27	7.7	4.72	8.18	2.15	2.41	1.86	2.36
Arap3	1.72	0.5	1.88	1.51	0.85	1.26	1.34	0.74	4.83	4.99	5.12	4.45	7.91	5.61	9.42	5.37	0.34	0.43	0.38	0.45	1.4	0.86	2.25	1.1	3.98	4.09	3.66	2.69
H2-M5	0.17	0.12	0.12	0.16	0.13	0.23	0.23	0.04	0.14	0.03	0.29	0.05	0.11	0.09	0.25	0.08	1.22	1.21	1.93	1.78	0.12	0.17	0.13	0.11	0.1	0.19	0.13	0
Myot	0.16	0	0.08	0.03	0	0	0.05	0	10.71	8.5	7.79	10.11	0.7	0.67	0.69	0.43	0.05	0	0.1	0.03	0.88	0.42	0.02	0.05	0	0	0	0
Mal2	3.34	1.94	5.37	4.85	3.31	4.45	5.24	4.29	8.34	8.31	10.73	12.85	0.9	1.2	1.39	1.5	0.02	0	0.09	0.02	6.79	5.38	3.24	6.97	44.48	48.11	51.47	64.22
Hbegf	1.95	0.77	2.35	2.19	0.95	1.13	0.98	0.79	1.27	1.78	1.29	1.4	8.55	7.95	10.67	7.09	0.6	0.54	0.71	0.45	2.49	1.53	1.78	2.43	2.06	2.02	1.31	1.42
Ppp2r2b	1.44	0.5	1.07	0.45	11.01	11.69	12.97	10.43	33.84	31.33	32.23	33.78	1.79	1.41	2.15	1.25	43.87	45.78	42.92	42.41	15.07	11.53	9.9	14.78	2.1	1.73	1.89	2.74
Dpysl3	4.34	2.14	5.01	4.45	3.69	3.25	3.82	2.39	12.24	11.51	12.97	15.17	4.4	5.02	7.26	5.07	52.13	54.38	55.03	53.38	7.16	7.79	9.98	6.44	34.72	35.21	37.52	27.06
Rab27b	0.58	0.52	0.87	0.67	0.32	0.5	0.55	0.49	0.18	0.18	0.15	0.18	0.53	0.56	0.74	0.64	0.01	0.03	0.01	0.02	0.44	0.57	0.58	0.49	3.25	3.11	2.48	3.39
Grp	0	0	0.12	0	1.96	1.44	1.74	0.81	0	0.14	0.07	0	0	0	0.06	0	0	0	0.06	0.31	0.93	0.25	0.06	0.06	0.46	0.14	0.52	0.16
Impa2	4.32	0.92	4.68	1.89	1.12	1.24	1.23	0.83	1.77	2.23	1.89	2.63	32.56	30.03	37.73	23.26	2.43	1.57	1.7	1.78	0.85	1.2	2.96	1.11	2.68	2.41	2.95	2.4
Prelid3a	8.46	1.97	3.91	4.86	0.03	0.03	0.1	0.08	0.16	0.18	0.24	0.15	1.42	2.03	1.18	1.81	1.74	1.68	1.66	1.42	0.08	0.22	0.24	0.16	0.64	0.86	0.72	0.9
1700034E13Rik	0	0	0.47	0.65	0.26	0.76	1.13	0.11	0.98	0.94	1.31	1.06	1.29	1.63	0.5	0.26	103.33	81.53	64.68	76.73	0.36	0.72	0.76	0.46	0.13	0	0	0
Sncaip	0.91	0.51	1.29	1	1.07	1.06	1.25	0.56	2.26	2.4	2.73	1.87	0.77	0.89	1.07	0.98	12.15	12.36	12.84	10.3	0.6	0.6	0.77	0.75	1.89	1.93	1.82	2.1
Ppic	6.92	3.14	8.76	6.09	7.15	6.65	9.13	4.6	80.22	78.09	81.48	72.25	8.32	8.53	13	6.98	0.76	0.6	1.1	0.78	7.54	7.74	24.18	7.54	13.33	11.98	14.28	13.08
Ldlrad4	12.6	7.62	12.97	9.7	3.17	2.86	3.09	2.28	37.57	38.38	38.06	37.56	13.25	12.03	13.61	11.34	2.21	1.99	1.53	1.73	3.63	3.27	5.56	3.28	5.04	5.48	4.58	4.88
Slc14a2	8.18	3.58	5.92	7.88	15.19	20.48	22.64	15.78	0.69	0.59	0.87	0.51	1.83	2.09	2.38	1.4	5.39	5.12	4.5	4.76	3.89	4.17	2.01	3.95	29.68	26.56	30.1	48.53
Galr1	0.02	0	0	0	0	0	0	0	0	0	0	0	0.61	0.48	0.23	0.2	0	0	0	0	0	0	0	0	0	0	0	0
Mapk4	0.81	0.21	0.81	0.48	0.63	0.66	0.65	0.37	18.32	18.32	18.47	18.42	1.1	0.82	1.4	1	0.47	0.4	0.32	0.38	0.91	1.01	0.73	0.96	2.12	1.69	1.84	1.96
Pde6a	0.08	0.02	0.08	0.16	0.22	0.64	0.51	0.29	0.08	0.1	0.07	0.06	0.11	0.14	0.11	0.26	0.21	0.08	0.17	0.23	1.07	0.86	0.83	1.63	0.13	0.03	0.01	0.05
Pcyox1l	9.42	2.84	8.14	4.83	2.65	1.86	2.39	0.93	5.39	4.88	5.04	4.04	17.24	15.58	17.22	14.23	2.08	2.18	2.35	1.93	1.55	2.09	1.76	1.69	2.3	2.05	2.58	2.01
Megf10	0.01	0	0.01	0.04	0.02	0.03	0.03	0.02	0.04	0.05	0.04	0.04	0	0.01	0	0	0.13	0.1	0.07	0.14	0.11	0.1	0.04	0.07	0.48	0.39	0.38	0.39
Slc12a2	3.17	1.43	3.69	3.39	2.39	1.85	2.67	2.03	50.77	43.08	53.39	48.62	5.12	5.71	6.52	4.34	5.53	5.02	5.76	6.71	3	3.29	3.4	2.78	12.4	12.92	12.77	10.27
Psat1	34.3	11.48	24.91	35.13	155.44	131.65	152.11	116.5	32.18	26.91	32.49	33.07	3.34	3.86	6.06	3.89	7.99	7.73	7.99	8.11	65.49	51.83	47.49	58.98	24.26	22.58	22.15	24.62
Asrgl1	4.68	2.71	4.55	5.49	8.49	10.54	10.27	7.1	8.34	7.16	10.83	7.14	6.42	7.86	5.22	5.88	175.6	172.62	143.51	177.68	12.59	13.63	8.98	14.05	8.13	6.9	6.79	7.73
Rab3il1	15.58	4.34	8.25	10.52	5.72	5.65	6.88	3.54	9.42	8.94	11.94	8.24	2.61	2.83	3.37	3.05	138.91	131.5	133.13	128.26	6.37	4.66	12.5	4.74	3.88	4.78	3.3	4.02
Cd5	0.26	0.18	0.03	0.03	1.46	2.08	1.74	1.55	0.23	0	0.22	0.06	0.03	0	0.12	0.18	0.16	0.02	0	0	0.46	0.2	0.72	0.27	0.27	0.06	0.18	0.11
Ms4a4c	0.34	0.09	0.24	0.3	0.93	0.51	0.67	0.22	0.36	0.31	0.45	0.19	0.61	0.7	0.5	0.44	0.06	0.06	0.06	0.1	1.68	1.16	3.78	0.55	0.55	0.39	0.43	0.7
Ms4a2	0	0	0	0.05	0	0.03	0.05	0	0.03	0.08	0.05	0.03	0	0	0	0	0	0	0	0	0.12	0.1	0.02	0	0.34	0.17	0.18	0.28
Keg1	0.21	0	0.04	0.13	0.08	0.08	0.13	0	10.27	9.57	10.35	11.52	0.71	0.64	0.7	0.31	0	0	0	0	0	0	0	0	0.08	0.02	0	0.1
Lpxn	2.2	1.55	2.08	2.34	2.88	2.72	3.21	2.84	2.29	1.5	2.18	1.24	2.21	2.22	2.51	2.11	26.65	22.32	21.46	28.87	5.68	3.95	16.04	4.25	5.74	6.33	5.33	6.86
Pcsk5	12.71	4.7	11.51	8.95	1.55	1.58	2.21	1.15	22.18	21.33	20.63	20.39	47.39	44.11	44.41	36.02	0.53	0.38	0.54	0.61	2.9	3.15	6.87	2.84	2.8	2.55	3.15	2.04
1700017D01Rik	0.31	0.18	0.18	0.05	0.08	0.22	0.4	0.37	0.27	0.05	1.22	0.08	0.39	0.32	0.05	0.15	61.59	66.32	69.69	61.53	0.37	0.37	0.29	0.4	0.02	0.08	0.05	0.24
Zp1	0	0	0	0	0	0	0	0	0.03	0	0	0	0	0	0	0	0.17	0.03	0.03	0.06	0.06	0.09	0	0.03	0	0	0	0
Tmem132a	4.11	0.86	3.14	2.47	3.71	4.02	5.67	2.04	13.29	11.63	11.5	10.45	4.56	4.9	5.25	3.99	0.83	1.3	0.89	0.88	6.21	6.39	6.04	5.57	28.78	27.84	37.68	21.82
Pga5	0	0	0	0	0.05	0.04	0	0	0	0.05	0	0	0	0	0	0	0.12	0.04	0	0	1.17	1.16	0.75	1.07	0	0	0	0
Syt7	0.82	0.15	0.54	0.28	0.17	0.16	0.13	0.08	0.37	0.41	0.54	0.44	0.17	0.26	0.19	0.41	5.24	4.29	4.78	5.5	0.92	0.83	0.93	0.83	2.02	1.83	2.23	1.36
Tmc1	0.15	0.07	0.13	0.2	0.27	0.29	0.26	0.3	0.13	0.06	0.22	0.06	0	0.01	0.07	0.09	3.6	3.4	3.28	3.74	0.2	0.14	0.05	0.23	0.28	0.15	0.11	0.22
Slc22a19	0	0	0	0	0	0	0	0	0	0	0	0	0	0	0	0	0.11	0.06	0.12	0.05	0	0	0	0	0	0	0	0
Lipk	0.22	0	0.22	0.12	0	0	0	0	0.03	0	0	0	3.03	2.04	4.14	1.31	0.05	0.14	0.21	0.08	0	0.06	0.05	0.03	0	0	0	0
Ehd1	15.23	5.6	13.36	14.06	11.93	11.27	10.78	6.01	22.33	20.86	22.57	23.3	12.92	11.37	13.8	12.29	103.09	104.06	112.2	104.62	14.62	14.69	11.59	13.28	16.59	17.13	17.84	15.88
Stambpl1	0.21	0.14	0.18	0.26	0.2	0.31	0.61	0.39	0.89	0.94	1.13	1.15	0.48	0.51	0.46	0.36	9.65	11.92	14.44	8.74	0.71	0.69	2.15	0.69	3.03	2.95	2.78	2.87
Majin	0.08	0.1	0	0	0	0.16	0.11	0.07	1.14	0.89	1.19	0.83	0.09	0.29	0.2	0.2	10.23	9.97	11.78	10.07	0.04	0.15	0.2	0.07	0.08	0.09	0.24	0.05
Cdca5	0.5	0.11	0.34	0.35	0.35	0.4	0.3	0.25	0.54	0.26	0.73	0.26	0.28	0.37	0.45	0.19	14.66	14.17	13.75	15.89	0.96	1.01	1.07	0.69	0.71	0.82	0.8	0.59
Tnfrsf25	3.97	1.29	1.75	1.39	1.01	0.83	1.03	0.5	8.52	5.65	7.78	6.74	1.94	1.75	2.02	1.75	0.3	0.31	0.23	0.46	1.14	1.41	1.56	0.94	2.68	3.01	3.44	1.54
Kif20b	0.92	0.92	1.84	1.88	0.55	1.17	1.15	1	0.82	0.83	1.3	1.16	1.02	1.22	1.34	0.81	11.76	11.39	10.78	12.2	1	0.87	1.18	0.87	0.91	0.77	0.95	1.09
Rpp30	2	1.52	3.12	3.28	3.06	3.78	3.88	3.3	3.14	2.86	4.04	3.27	2.97	2.97	3.17	2.79	18.19	17.29	19.33	17.71	3.63	3.19	4.3	3.15	3.53	2.95	3.76	4.42
Ankrd1	0	0	0.03	0.04	0.11	0.07	0.03	0.03	1.55	1.5	0.43	1.14	0.36	0.16	0.21	0.14	0.03	0	0.03	0	0.13	0.27	0	0.1	0.21	0.04	0	0.34
Mlana	0	0	0	0	0.62	0.9	0.44	0.98	0	0	0	0	0	0	0	0	0	0	0	0	0.19	0.28	0.08	0.27	0	0	0.1	0
Gldc	33.86	5.97	10.92	18.41	160.56	148.98	180.46	98.22	0.38	0.39	0.34	0.31	0.04	0.11	0.08	0.08	1.6	1.45	1.31	1.64	53.75	47.96	50.17	50.75	114.66	94.17	96.95	82.69
Cst6	0.26	0.21	0.65	0.11	0	0.09	0	0	0.02	0.07	0.02	0.08	0.35	0.54	0.2	1.14	0.01	0.01	0	0.03	0.03	0.01	0	0.03	0.02	0	0.05	0.02
Dkk1	0.83	0.6	0.81	0.93	0	0	0	0	0	0.05	0	0.03	0	0	0	0	0	0	0	0	0	0	0	0	0	0	0	0
Cnih2	2.06	0.43	1.17	0.99	0.78	0.76	0.81	0.18	1.44	1.39	1.71	1.53	0.4	0.23	0.44	0.51	9.57	9.36	9.55	10.13	0.72	1.09	0.77	0.5	0.76	0.49	0.45	1.03
Apba1	2.03	0.89	1.99	1.3	1.14	1.34	1.2	0.67	2.01	2.14	2.12	1.63	1.46	1.78	1.93	1.54	25.75	23.81	20.72	27.63	2.31	2.71	4.4	2.52	4.7	4.89	5.1	4.03
Tesmin	0.36	0.07	0.23	0.11	0.42	0.3	0.46	0.19	1.05	0.87	2.78	0.83	0.71	0.4	0.29	0.33	83.05	91.2	106.02	93.15	0.36	0.54	0.72	0.29	0.19	0.41	0.44	0.36
Gal	0	0	0	0	0	0	0	0	0	0	0	0	0	0	0	0	0.38	0.14	0.15	0.08	0	0	0	0	0.35	0.56	0.44	0.42
Vldlr	3.12	1	3.52	3.19	3.17	3.57	4.45	3.09	9.52	8.92	9.82	9.73	22.24	21.27	23.26	17.83	0.05	0.07	0.1	0.05	3.28	3.13	3.15	2.91	12.15	12.53	12.59	12.73
Slc1a1	60.61	19.77	99.95	25.31	58.71	75.04	65.11	47.37	8.2	7.81	6.85	10.18	217.47	267.1	245.18	274.33	0.09	0.03	0.06	0.08	101.83	100.74	65.51	103.82	1.52	3.32	1.53	1.05
Kcnk7	0.24	0	0.05	0	0.89	0.76	0.41	0.23	0.56	0.65	0.42	0.21	0.34	0.09	0.1	0.05	1.91	1.67	1.51	1.45	0.14	0.1	0	0.05	0.1	0.05	0	0.12
Ltbp3	89.35	29.72	59.35	55.7	6.22	5.01	7.35	2.76	137.85	134.18	120.82	127.49	43.96	41.25	47.42	45.42	1.22	0.99	1.13	1.61	8.25	7.34	11.81	6.95	16.8	16.19	17.17	13.21
Vegfb	10.1	3.69	7.97	5.86	6.07	4.83	5.92	2.97	31.17	37.16	31.66	31.31	8.63	6.96	8.15	7.01	2.3	2.2	1.74	2.49	6.97	6.4	8.34	6.38	11.27	11.4	9.83	10.67
Lgals12	0.24	0.06	0.44	0.26	0.61	0.72	1.39	0.42	3.37	4.68	3.23	5.29	0.15	0.12	0.2	0.28	0.24	0.17	0.16	0.09	0.3	0	0	0.02	1.43	1.69	1.06	0.63
Cep55	0.19	0.14	0.44	0.16	0.16	0.27	0.42	0.24	0.4	0.17	0.63	0.17	0.56	0.39	0.38	0.48	12.01	11.13	10.61	12.4	0.26	0.32	0.88	0.39	0.3	0.27	0.34	0.46
Hells	0.55	0.38	0.95	1.26	0.53	0.47	0.65	0.65	1.01	0.92	1.46	1.53	0.64	1.13	1.09	0.62	8.84	7.57	8.62	8.91	0.93	0.76	1.35	0.76	0.78	0.82	0.86	0.84
Slit1	6.47	1.65	3.42	4.52	4.37	3.84	6.59	2.98	5.5	5.13	5.21	4.28	0.3	0.34	0.28	0.1	2.73	2.89	2.53	3.17	13.74	13.51	8.71	12.9	0.33	0.24	0.27	0.29
Efhc2	0.23	0.09	0.27	0.18	0.08	0.12	0.17	0.37	0.94	1.06	1.35	1.61	1.37	1.97	1.62	1.53	13.91	16.85	18.53	15	0.14	0.21	0.08	0.2	0.15	0.1	0.12	0.03
Pcgf6	5.23	1.35	3.71	4.25	6.77	5.39	8.52	7.45	5.41	4.32	4.82	4.07	2.7	2.89	3.26	3.65	29.28	28.15	28.94	30.77	6.71	5.81	5.37	6.41	7.69	7.22	6.3	6.8
5430427O19Rik	0.17	0.08	0.46	0.44	0.69	1.63	1.4	1.31	0.24	0.09	0.15	0.19	0.22	0.38	0.28	0.34	0	0.01	0.06	0.05	0.77	0.8	2.27	0.82	0.27	0.12	0.18	0.22
Gsto2	1.1	0.62	1.16	1.19	1.33	1.48	1.93	0.9	0.91	0.93	3.36	0.96	1.04	1.4	0.45	1.12	99.87	96.68	101.89	104.8	1.75	1.82	1.76	0.66	2.04	2.47	1.65	2.72
Habp2	0.02	0.03	0.21	0.05	0	0.22	0.04	0	2.96	3.99	2.41	3.38	0.07	0.22	0.11	0.2	0.02	0	0.02	0	1.32	1.1	1.2	1.05	0.09	0	0	0.13
Tdrd1	1.36	0.43	1.02	1.29	0.11	0.28	0.32	0.12	0.2	0.37	1.12	0.38	0.23	0.61	0.18	0.44	50.27	52.43	53.62	56.96	0.68	0.53	0.46	0.75	0.1	0.12	0.18	0.12
Vwa2	18.02	3.98	9.5	9.11	3.56	2.24	3.19	1.45	8.04	6.86	8.2	8.09	1.59	1.79	1.96	3	0.15	0.33	0.44	0.32	2.06	1.84	1.84	2.01	0.82	0.69	0.83	1.13
Gfra1	130.49	53.99	110.93	124.05	14.74	14.32	15.78	11.79	5.75	4.36	5.76	4.83	33.42	38.89	36.23	49.58	0.75	0.75	0.75	0.76	1.03	0.93	1.21	1.34	3.94	2.93	3.37	3.01
Btbd1	25.67	14.21	33.96	35.15	17.7	17.38	20.07	17.65	20.09	19.37	22.34	22.22	33.41	40.21	34.82	36.28	129.98	134.7	140.39	124.76	17.85	18.13	19.58	20.12	22.51	21.03	19.68	19.72
Gcgr	0.07	0.06	0.07	0	0.26	0.1	0.27	0.13	0	0.05	0	0.03	0.03	0.05	0.07	0	0.02	0.02	0.11	0.02	0.57	0.37	0.55	0.13	0.03	0.05	0.15	0.06
Arhgap19	2.63	0.88	2.47	2.3	1.21	0.93	1.52	0.65	1	1.15	2.31	1.33	1.99	2.4	2.49	2.03	29.11	27.88	28.78	30.54	1.66	1.42	9.9	1.32	3.81	3.96	4.21	3.78
Ubtd1	8.36	2.5	7.15	5.38	6.44	6.22	5.69	3.07	9	8.36	10.6	7.38	6.09	6.51	6.03	6.91	70.53	76.95	79.92	77.43	11.96	9.47	13.65	8.8	13.2	12.8	13.9	12.78
Fn3k	1.22	0.28	0.45	0.35	0.3	0.15	0.27	0.19	2.76	2.32	3.26	2.22	0.29	0.36	0.14	0.4	0.01	0.09	0.03	0.09	0.38	0.52	0.32	0.55	0.7	1.22	0.86	0.86
Hoga1	6.51	2.97	6.19	4.42	2.74	3.44	2.66	1.95	32.67	32.78	33.02	28.11	3.19	4.83	4.39	4.7	11.97	9.89	11.03	9.32	2.34	2.6	2.47	2.42	4.4	2.68	3.91	3.38
Cnnm1	0.38	0.08	0.05	0.04	0.18	0.11	0.07	0.02	1.64	1.84	1.56	1.68	0.07	0.08	0.04	0.03	2.17	2.03	1.96	2.16	0.05	0.08	0	0.09	10.32	13.1	12.69	8.44
Cpn1	6.76	2.48	3.65	5.95	40.52	33.51	36.32	22.52	6.68	6.4	6.57	6.33	0.44	0.34	0.3	0.17	7.3	5.46	6.13	6.47	1.66	2.01	1.34	1.7	0.23	0.39	0.28	0.37
Scd3	0.99	0.33	0.47	0.78	3.24	3.35	3.96	3.06	0.97	1.05	0.68	0.86	0.34	0.26	0.16	0.11	0.52	0.46	0.72	0.39	3.15	3.24	2.45	3.29	1.34	1.13	0.84	0.61
Sema4g	3.08	0.72	2.23	1.99	0.58	0.48	0.95	0.39	3.54	3.53	4.06	3.22	18.74	10.88	21.33	10.75	1.98	2.28	2.55	1.9	0.19	0.19	0.17	0.15	5.99	6.55	5.53	6.22
Poll	5.59	1.35	4	3.64	5.84	4.86	6.12	2.8	6.5	6.2	7.02	5.1	3.4	3.32	4.41	4.05	30.54	32.11	30.02	30.37	5.29	4.39	3.64	3.78	4.67	3.27	4.81	4.07
Fgf8	0.2	0	0	0	0.22	0.11	0	0.09	0.18	0.23	0	0.11	0	0	0	0	0.37	0.31	0.19	0.35	0	0.05	0	0	0	0	0	0
Kcnip2	0.8	0.27	0.37	0.14	0.41	0.58	0.39	0.55	1.16	1.02	1.11	1.34	0.4	0.29	0.18	0.24	5.92	4.98	5.51	5.92	0.32	0.36	0.54	0.43	1.69	2.48	2.57	2.68
Slc6a20b	0.04	0.13	0.28	0.24	0.01	0	0.01	0	5.31	4.77	5.27	6.79	0.28	0.25	0.43	0.25	0.48	0.32	0.3	0.46	0.05	0.05	0.03	0.05	0.05	0.05	0.03	0
Ribc1	0.59	0.66	0.89	0.6	1.41	0.99	1.36	0.7	4.03	4.34	4.45	4.27	1.95	1.44	1.62	1.22	18.38	19.29	20.55	16.82	0.67	0.78	0.56	0.74	0.62	0.4	0.86	0.25
Fgd1	0.99	0.53	0.97	0.88	0.74	0.61	0.77	0.5	7.21	8.51	8.01	7.89	1.17	0.9	1.36	1.09	0.68	0.51	0.6	0.55	1.12	1.3	1.45	1.04	2.13	2.08	2.36	1.91
Pfkfb1	2.97	0.97	2.97	3.54	21.13	19.12	24.62	19.65	2.24	2.47	2.17	3.11	0.7	0.75	0.71	0.54	1.71	2.06	2.09	2.14	3.15	2.47	3.14	2.8	2.18	2.11	1.99	2.02
Sat1	110.95	45.81	104.53	113.41	342.25	318.56	359.1	291.6	49.61	49	54.98	47.2	82.54	90.36	78.45	73.23	2.1	3.56	2.62	3.15	261.6	240.69	260.28	252.92	67.94	59.4	60.91	73.2
Acot9	17.38	4.01	12.72	16.73	146.9	145.39	171.38	136.03	10.54	9.51	10.44	11.41	10.58	12.46	10.35	11.29	19.68	24.15	27.91	23.42	96.45	95.94	73.92	102.83	23.55	22.54	21.99	23.4
Prdx4	11.81	2.98	10.48	8.89	7.46	6.64	9.18	4.58	19.81	17.54	19.97	18.87	6.42	7.14	8.22	6.85	111.2	122.88	123.84	121.06	8.94	9.89	16.56	8.03	8.15	7.81	7.39	6.96
Car5a	0.05	0	0	0.15	0.15	0.1	0.44	0.22	0	0.11	0.2	0.05	0	0.09	0	0	0.13	0.04	0	0	0	0.14	0	0	0.05	0.05	0	0.12
Gpr143	0	0	0	0	0	0	0.07	0.07	0	0	0.04	0	0	0	0	0	0.1	0	0	0	0	0	0	0.04	0.2	0.13	0.2	0.09
Mettl7b	0.1	0.19	0	0.05	0.63	0.2	0.32	0.13	12.78	15.91	13.31	16.31	1.19	0.65	1.39	0.72	1.02	0.79	0.97	0.67	0.19	0.33	0.21	0.09	0	0.11	0.1	0
Cd63	39.01	18.11	40.45	30.68	19.93	15.58	16.26	12.79	51.62	51.75	50.91	50.08	73.54	82.2	92.16	78.67	4.28	4.74	4.52	4.43	17.81	18.11	41.85	14.13	9.76	9.2	9.33	9.86
Gdf11	0.35	0.15	0.4	0.27	2.11	6.75	2.63	2.69	0.59	0.44	0.25	0.5	0.5	0.63	0.69	0.37	0.47	0.67	0.46	0.64	0.36	0.63	0.82	0.34	1.13	1.1	1.28	1
Dgka	11.33	4.79	8.72	8.17	4.79	5.22	5.49	3.49	12.45	13.53	14.81	13.37	8.29	8.55	9.35	8.99	50.31	49.21	41.77	52.11	6.55	5.6	7.74	6.4	9.82	10.21	10.55	9.8
Pmel	28.34	8.63	18.31	7.02	0.91	0.94	1.25	0.6	0.48	0.78	0.63	1.19	1.38	4.69	2.52	9.79	6.12	6.52	6.29	7.13	0.92	1.07	0.6	0.39	1.12	1.13	1.02	0.6
Aatk	0.72	0.12	0.74	0.38	0.26	0.4	0.31	0.1	3.11	3.05	3.58	2.96	0.39	0.51	0.61	0.48	0.14	0.16	0.08	0.23	1.05	1.18	1.9	0.58	4.81	4.82	4.45	3.69
Fscn2	0.45	0.09	0.14	0.26	1.09	1.46	1.39	0.58	1.08	0.58	0.71	0.72	0.12	0.1	0.07	0.04	0.41	0.15	0.51	0.62	0.28	0.14	0.12	0.2	0.26	0.19	0.11	0
Tac2	0.98	0.63	1.63	0.38	0	0	0	0	0.24	0.16	0.23	0	0.08	0.67	0	1.41	0.13	0	0	0	0.07	0	0.19	0	0	0	0	0.09
Myo1a	0.12	0.09	0.08	0.06	0.09	0.04	0.21	0	0.22	0.23	0.39	0.21	0.18	0.1	0.16	0.06	9.06	7.63	7.77	8.99	0.1	0.22	0.12	0.18	0.11	0.31	0.07	0.17
Ttc4	14.44	6.29	14.23	14.28	12.55	11.34	15.01	10.03	20.02	18.24	21.75	18.76	14.58	14.87	15.42	13.35	80.05	83.99	79.43	85.12	13.21	12.45	12.44	12.81	16.46	15.57	17.44	16.36
Katnal2	4.25	1.72	2.85	3.34	5.08	5.91	7.49	4.04	10.03	9.14	10.6	8.21	1.27	1.46	1.17	0.74	47.9	42.43	45.88	50.04	1.65	2.33	1.04	1.73	0.59	0.69	0.43	0.59
Pias2	12.17	6.96	15.45	15.2	9.12	11.08	11.93	9.51	18.52	17.18	20.87	20.16	16.68	18.01	16.31	15.09	94.27	94.7	98.98	96.22	11.55	12.06	11.18	11.38	15.27	15.72	14.94	14.88
St8sia5	10.54	1.69	4.58	8	1.2	1.92	1.67	0.83	0	0	0.06	0.03	0	0.03	0.03	0	1.32	1.21	1.56	1.4	0.09	0.21	0.45	0.23	0.19	0.13	0.19	0.26
Crisp3	0.08	0.05	0.2	0.27	0.27	0.48	0.39	0.55	0	0	0	0	0.1	0.16	0	0	0	0.04	0	0.04	0.88	0.37	0.37	0.67	1.82	1.32	1.01	0.95
Fuom	2.08	0.54	2.31	1.79	3.51	4	3.68	2.49	11.28	12.95	11.39	12.75	1.66	1.8	1.41	1.43	0.23	0.33	0.26	0.42	3.65	4.34	3.14	3.52	2.24	2.89	2.1	2.23
Prap1	0	0.37	0.28	0	0	0	0	0	0.33	0.64	0.72	0.32	0	0	0	0	0	0.08	0.18	0.19	0.19	0.19	0.26	0.18	0	0	0	0
Caly	0.05	0	0.1	0	0	0	0	0	3.42	5.37	4.04	4.8	0.52	0.42	0.3	0.21	0.76	1.3	0.54	0.87	0	0	0.04	0	0.05	0.05	0.05	0.18
Msx3	0.03	0.03	0	0	0	0	0	0	1.04	0.87	0.9	1.85	0.09	0.07	0.03	0.05	0	0	0.02	0.03	0	0	0	0	0	0	0	0
Adam8	0.74	0.25	0.54	0.33	0.61	0.66	1.04	0.39	12.69	14.06	11.37	14.96	1.05	1.12	1.03	0.59	2.22	1.95	2.66	1.9	1.29	1.2	26.88	0.98	0.98	1.31	0.98	1.02
Adgra1	0.05	0	0.04	0.01	0.01	0.04	0.01	0	0.88	0.74	0.81	0.77	0.18	0.13	0.1	0.03	0.15	0.02	0.08	0.1	0.66	0.46	0.19	0.44	2.09	1.47	1.25	2.29
Cyp2e1	0.49	0.67	2.25	0.56	3.19	9.23	19.81	7.5	142.81	146.77	135.8	260.14	4.5	5.33	6.99	3	0	0	0	0	4.16	0.86	0.23	0.4	38.74	46.65	23.22	21.55
Syce1	0.41	0.52	0.32	0.66	0.84	1.5	1.18	1.13	0.84	0.41	3.15	0.76	1.25	2	0.38	0.43	161.78	167.09	139.6	153.83	1.7	1.32	1.01	1.69	0.13	0.18	0	0.46
Urah	0.6	0.09	0.39	1.37	0.79	0.77	0.62	0.31	3.15	1.78	2.01	2.49	0	0.39	0.21	0.14	0	0	0	0	0.73	0.53	0.59	0.38	0.14	0.75	0.63	0.51
Cox8b	0	0	0.16	0	0	0	0	0	0.19	0.92	0.89	0.36	0	0	0	0	0	0	0	0	0.33	0	0.44	0.16	0.17	0.19	0.17	0
Ptdss2	15.58	5.33	11.26	12.11	4.31	3.89	4.66	2.36	16.15	15.65	17.37	16.19	9.03	8.51	9.16	9.82	65.34	64.5	71.96	68.64	4.52	3.6	5.22	3.68	12.11	10.23	11.35	11
Cdhr5	13.87	6.18	10.82	9.4	0.07	0.07	0.02	0.04	86.78	99.45	86.15	93.56	4.66	4.57	6.27	5.75	1.7	1.19	1.28	1.37	0.02	0.11	0.02	0	0.05	0.05	0.09	0.14
Lmntd2	13.32	3.75	8.62	8.42	4.27	5.1	5.71	4.06	5.58	5.52	7.15	5.04	7.61	6.52	7.4	5.43	55.92	51.81	56.43	50.06	6.49	5.17	4.27	5.64	6.17	6.21	5.69	6.13
Eps8l2	2.43	1.71	2.05	1.88	2.23	1.78	2.3	1.44	122.59	122.06	112.42	112.03	7.73	6.35	9.59	5.32	0.98	0.8	0.93	0.94	2.73	1.58	1.54	1.93	6.41	6.19	6.44	6.34
Muc2	4.63	1.98	2.76	3.14	0.13	0.13	0.11	0.08	1.52	1.56	1.53	1.31	0.24	0.12	0.23	0.28	0.43	0.42	0.6	0.61	0.24	0.26	0.16	0.25	0.28	0.48	0.21	0.15
Zfp711	0.36	0.33	1.01	1.14	0.33	0.39	0.41	0.56	0.49	0.72	0.83	0.66	0.26	0.29	0.42	0.38	8.85	8.8	9.55	9.8	0.37	0.42	0.54	0.44	0.32	0.49	0.26	0.31
Phkg1	0.18	0.06	0.15	0.05	0.03	0.08	0.19	0.09	9.42	10.03	10.67	7.57	0.41	0.22	0.41	0.35	0.07	0.22	0.28	0.22	0.22	0.12	0.18	0.07	0.29	0.53	0.24	0.19
Fgf14	0.02	0.08	0.03	0.04	0	0.07	0.05	0	0.11	0.05	0.09	0.13	0.02	0.03	0	0.05	2.12	1.94	2.37	2.39	0.02	0.05	0.07	0.05	0.03	0	0.05	0.02
Rbfox3	6.63	4.89	7.04	5.17	0.47	1.03	0.88	0.3	10.2	10.12	9.46	9.24	7.02	8.71	7.28	11.58	0.14	0.11	0.24	0.06	13.65	16.59	11.55	16.38	95.44	94.99	110.32	77.45
Pde8a	11.74	5.94	12.55	11.42	23.15	22.8	27.13	17.27	15.39	16.43	17.57	15.21	4.89	8.21	5.7	11.39	90.71	86.43	86.72	90.99	14.71	15.59	12.59	14.51	6.31	6.75	6.66	6.79
Cpeb1	14.79	5.05	13.9	11.9	31.74	30.53	38.64	28.3	8.26	8.56	7.79	7.56	18.58	20.99	18.66	19.02	4.23	3.92	4.71	4.73	11.06	9.41	6.75	10.44	8.23	7.14	7.46	9.58
Nat1	0.04	0	0.17	0	0.1	0.09	0	0	0.56	0.25	0.19	0.24	0.05	0	0	0	0.08	0	0.04	0.04	0	0	0	0	0.33	0.05	0.09	0.11
Tmem89	0.19	0.16	0.06	0.14	0	0.13	0.06	0.18	0.22	0.21	1.22	0	0.07	0	0.19	0.07	23.56	28.02	30.94	26.21	0.31	0.12	0.06	0.12	0.13	0.07	0.13	0.32
Arhgef9	1.81	0.66	1.91	1.85	1.21	1.78	1.78	1.45	4.21	3.77	4.4	4.07	1.54	1.31	1.78	1.46	0.21	0.22	0.18	0.18	2.04	2.04	2.03	2.4	7.72	7.5	7.48	7.49
Cnksr2	44.75	37.81	64.39	62.5	4.61	4.93	5.06	4.53	0.33	0.33	0.5	0.39	84.98	90.45	80.87	74.39	0.48	0.46	0.57	0.37	0.6	0.47	0.76	0.57	0.4	0.35	0.32	0.44
Rps6ka6	0.2	0.13	0.32	0.2	0.35	0.33	0.33	0.52	1.64	1.79	2.01	2.01	0.22	0.21	0.25	0.17	7.25	7.79	7.67	7.4	0.24	0.15	0.39	0.3	0.14	0.26	0.16	0.2
Tmem47	1.57	0.82	2.98	2.27	0.82	1.06	1.05	1.42	2.08	2.03	2.31	2.29	1.68	1.73	1.8	1.92	1.08	0.95	1.33	1.48	3.53	4.08	3.46	4.35	12.16	11.92	12.33	11.36
Alox5	4.9	2.9	4.41	4.54	0.63	0.77	1.16	0.51	4.61	5.23	4.24	4.35	0.82	0.72	0.75	0.78	0.41	0.43	0.47	0.51	1.17	1.15	0.95	1.02	0.93	1.04	0.71	0.82
Slc28a1	0.12	0.05	0.16	0.11	0	0.02	0.08	0.02	2	1.76	2.36	1.93	0	0.12	0.04	0.11	0.58	0.64	0.88	0.67	0.06	0	0	0	0.04	0.05	0.06	0.03
A930017K11Rik	2.71	0.54	1.37	1.72	0.13	0.15	0.15	0.04	0.05	0.05	0.23	0.05	0.03	0.02	0.02	0.07	0.06	0	0.15	0.02	0.16	0.21	0.6	0.15	1.01	0.76	1	1.01
Agbl1	0.09	0	0.02	0	0.22	0.43	0.45	0.32	0	0	0	0.02	0.02	0	0.02	0.05	1.53	1.84	2	1.39	0.19	0.05	0.03	0.02	0	0	0	0.07
Hspa4l	2.11	1.09	2.49	3.26	2.19	2.44	2.91	2.58	10.32	9.25	12.07	11.47	3.11	4	3.3	2.63	97.6	93.08	91.33	96.03	3.34	2.76	3.17	3.09	3.4	3.03	2.98	3.04
Plk4	1.25	0.72	1.74	1.64	1.66	0.97	1.53	1.52	1.53	1.62	2.15	1.46	1.13	2.1	1.72	1.51	29.42	27.59	28.46	28.56	1.75	1.6	1.84	1.79	1.88	1.34	2.09	1.75
Larp1b	8.87	5.6	9.75	10.51	12.07	12.8	15.57	12.93	5	5.42	6.28	5.3	10.12	11.58	10.65	11.24	78.9	84.74	81.58	68.88	11.72	11.63	8.47	11.93	18.51	18.23	17.81	15.14
Rassf3	13.85	4.33	12.05	9.22	4.78	5.43	4.98	2.92	5.53	5.8	5.99	5.92	22.98	21.43	22.49	21.52	1.27	1.25	1.14	1.36	15.41	17.49	16.79	13.25	74.72	69.8	73.19	57.37
Ccr1	0.29	0.27	0.9	0.91	0.93	1.06	1.5	0.92	1.74	1.05	1.02	1.13	1.31	2.32	0.82	1.65	0.06	0.09	0	0.08	1.71	1.92	9.56	1.98	1.68	2.02	1.4	1.93
Nudt5	4.09	1.62	3.94	4.43	18.88	20.25	25.96	19.51	3.63	3.44	3.75	4.2	2.85	3.3	3.06	3.08	1.8	1.98	2.14	1.97	10.92	9.44	8.99	9.98	7.22	6.55	6.83	6.76
Fam20c	5.63	1.48	3.67	3.17	2.08	1.79	2.46	1.09	20.28	19.01	18.65	16.33	7.55	5.94	7.65	6.47	0.3	0.41	0.39	0.41	6.39	5.99	14.25	3.78	3.79	3.47	3.55	3.13
Smad7	9.87	2.07	5.85	3.88	1.07	0.95	0.97	0.49	22.88	23.86	26.33	17.12	7.59	7.23	8.77	7.52	0.57	0.6	0.69	0.84	4.37	4.18	3.72	3.43	10	10.34	10.11	7.88
Myo5b	66.04	26.67	64.63	56.53	49.14	46.83	56.82	34.67	45.54	44.31	44.95	43.08	224.28	184.49	244.81	169.14	17.25	18.94	20.34	18.84	32.41	30.75	18.6	28.93	28.22	28.61	28.69	28.24
Snca	0.08	0.11	0.04	0.32	0.37	0.27	0.24	0.2	0.1	0.05	0.27	0.32	0	0.16	0.13	0.18	0.16	0.04	0.19	0.04	0.08	0.42	0.19	0.4	1.07	0.76	1.37	0.91
Rp1	0.32	0.22	0.68	0.48	0.58	0.82	0.74	0.73	13.26	11.56	13.79	13.52	1.22	1.46	1.31	1.08	4.56	4.64	4.33	4.95	0.9	0.88	0.95	1.17	0.19	0.03	0.13	0.22
Oprk1	0	0	0	0	0	0	0	0	0	0	0	0	0	0	0	0	0.01	0	0	0.03	0	0	0	0	0.03	0.1	0.03	0.03
Rb1cc1	7.92	4.59	10.9	10.86	7.29	8.5	11.72	10.05	10.71	9.06	12.3	11.34	13.47	16.41	13.53	13.55	81.62	75.32	77.12	86.15	11.21	11.17	12.69	11.21	12.32	12.75	11.67	12.26
Sntg1	0.43	0.19	0.36	0.43	0.62	1.07	1.06	0.78	0.15	0.15	0.17	0.12	2.93	2.74	1.12	1.54	0.93	0.97	1.47	1.09	12.27	12.97	5.45	10.33	1.22	1.17	0.9	1.89
Mybl1	0.87	0.32	0.93	1.13	0.67	0.75	0.76	0.61	1.54	1.7	2.04	1.67	0.74	1.12	0.87	0.77	23.18	21.05	20.33	24.45	1.06	0.68	1.03	1.2	1.16	1.02	0.59	1.06
Ppp1r42	0.04	0.11	0.04	0.27	0.09	0.18	0.27	0.12	2.11	1.3	2.24	2.01	0.25	0.72	0.26	0.27	50.66	49.71	53.12	48.12	0.29	0.37	0.22	0.28	0	0.05	0	0.16
Msc	0.03	0	0.03	0.04	0	0.04	0.06	0.03	0.04	0.04	0.07	0.07	0.04	0	0	0.07	0.03	0	0.09	0	0	0	0.12	0.16	0.14	0.57	0.32	0.39
Paqr8	0.38	0.16	0.51	0.32	0.45	0.4	0.5	0.4	0.78	0.72	0.97	0.68	0.39	0.36	0.26	0.39	10.88	11.62	11.49	12.53	1.09	1.02	1.28	1.2	1.27	1.4	1.4	1.41
Eya1	0.03	0.03	0.01	0.04	0.06	0.04	0.01	0.01	0.13	0.15	0.13	0.03	0.05	0.05	0	0.03	0.72	0.76	0.65	0.54	0.04	0.11	0.41	0.01	3.54	3.77	3.89	3.56
Pth2r	0	0	0	0.03	0.05	0.03	0.02	0.05	0	0.03	0.11	0.03	0.03	0.09	0	0	1.72	2.16	1.85	2.11	0	0.05	0.11	0	0.1	0.06	0.03	0.03
Idh1	9.93	3.51	12.18	8.64	7.99	8.41	10.03	6.48	26.11	26.05	24.96	24.81	8.94	11.12	9.09	10.44	19.08	18.62	19.49	19.72	16.18	16.16	40.69	14.6	108.61	107.26	114.35	99.91
Crygc	0.53	0	0	0	0	0	0	0	0.09	0.17	0.41	0	0	0	0	0	0.21	0	0.07	0.08	0.38	0.6	0.54	0.43	62.95	72.92	69.82	73.46
Mdh1b	0.1	0.22	0.17	0.19	0.41	0.36	0.35	0.29	8.47	6.96	8.15	7.8	1.14	1.5	0.78	0.37	54.24	51.19	50.62	54.92	0.55	0.2	0.18	0.46	0.11	0	0	0.17
Adam23	1.45	0.69	1.35	1.66	11.42	10.23	14.43	8.18	10.03	8.29	8.05	9.17	0.78	0.85	0.7	0.56	1.32	1.28	1.5	1.86	11.68	13.49	12.26	11.66	40.84	38.74	48.92	30.68
Nrp2	3.14	1.68	2.91	3.17	4.06	5.28	4.16	2.64	7.05	7.12	7.71	6.25	2.89	2.97	3.26	2.55	1.36	1.2	1.43	1.43	4.49	4.77	11.81	3.77	20.97	23.15	25.19	22.58
Ccdc150	0.34	0.42	0.53	0.56	0.42	0.56	0.71	0.64	4.62	4.5	5.49	4.65	0.62	0.75	0.51	0.25	39.96	41.59	36.25	39.44	0.64	0.66	0.35	0.72	0.69	0.88	0.98	1.03
Lancl1	8.69	2.75	7.36	6.95	10.26	9.53	10.76	6.9	8.57	8.3	10.68	8.77	9.33	11.05	9.95	9.27	68.88	72.8	76.33	75.07	6.36	6.39	6.39	7.13	16.12	14.82	15.59	16.46
Cd28	0.4	0.18	0.43	0.35	0.35	0.4	0.48	0.32	0.09	0.11	0.07	0.03	0.21	0.14	0.13	0.19	0.03	0.02	0.05	0.03	0.37	0.51	3.27	0.58	0.32	0.14	0.17	0.17
Raph1	5.8	2.74	5.91	4.86	2.6	3.25	3.93	2.76	2.65	2.9	3.04	3.06	24.14	20.3	24.16	17.12	1.64	1.46	1.55	1.65	3.65	3.48	6.2	2.78	7.34	7.75	6.88	6.01
Ica1l	0.49	0.15	0.49	0.58	0.18	0.55	0.27	0.36	0.52	0.34	0.63	0.54	0.17	0.27	0.22	0.12	30.7	28.68	26.9	29.51	0.45	0.55	0.32	0.66	0.24	0.16	0.41	0.27
Wdr12	2.06	0.8	2.14	1.99	1.43	1.32	1.58	1.22	1.51	1.3	1.8	1.42	1.66	1.95	1.65	1.78	10.51	9.81	10.75	10.65	1.49	1.58	1.52	1.58	1.89	1.65	1.62	1.93
Trak2	9.87	3.17	12.5	9.16	7.43	7.63	8.29	5.11	17.14	16.42	16.81	17.55	52.47	62.97	52.81	41.26	2.38	2.54	2.77	3.05	8.39	8.3	8.94	7.88	17.16	16.52	17.11	15.75
Sgo2a	0.19	0.15	0.47	0.53	0.14	0.14	0.3	0.17	0.65	0.47	0.7	0.55	0.41	0.58	0.61	0.28	18.16	15.68	15.02	19.07	0.41	0.27	0.65	0.41	0.56	0.34	0.4	0.29
Tex30	0.65	0	0.94	0.28	1.37	1.15	2.24	1.14	1.46	0.88	1.51	1.63	1.03	1.34	0.85	0.84	38.83	39.43	41.72	40.95	1.04	1.98	1.91	1.24	2.63	2.21	2.01	1.44
1500015O10Rik	1.18	0	0.84	1.07	1.92	1.59	2.7	1.04	15.99	14.44	19.36	14.87	0.7	1.27	1.62	0.63	0	0.11	0	0	0.66	1.62	1.82	1.68	3.2	1.77	4.33	3.5
Khdrbs2	0	0.03	0.03	0	0	0	0.02	0	0	0.04	0.01	0	0.03	0.01	0.01	0	0.08	0.09	0.09	0.12	0	0	0	0	0	0.03	0	0.03
Slc9a2	15.73	5.88	13.08	15.07	0.83	1.07	0.99	0.97	1.05	0.94	1.15	0.92	3.94	5.94	5.72	6.06	2.97	2.81	2.53	3.45	2.83	2.82	1.63	1.94	1.24	1.21	0.84	1.08
Il1rl1	0.16	0.01	0.03	0.08	0.15	0.2	0.48	0.39	0.61	0.45	0.47	0.32	0.26	0.26	0.16	0.1	0.14	0.14	0.1	0.1	0.59	0.53	0.8	0.45	1.91	1.98	1.58	1.74
Il1r2	0.17	0.05	0.04	0.09	0.05	0.09	0.04	0	0.24	0.05	0	0	0.15	0	0	0	0.04	0.11	0.04	0.04	0.12	0.21	0.45	0.2	1.24	0.66	0.52	0.16
Npas2	2.21	1.04	1.34	2.23	1.4	1.43	1.66	1.4	7.21	7.71	7.05	7.55	1.14	0.9	0.82	1.45	0.67	0.87	0.53	0.63	2.02	1.8	1.54	2.12	0.68	0.8	0.53	0.67
Chst10	4.31	1.13	1.73	2.7	32.55	29.75	37.38	24.49	0.2	0.2	0.24	0.24	0.06	0.1	0.06	0.22	0.62	0.62	0.81	0.56	20.04	17.95	15.21	18.07	1.99	1.34	1.06	1.13
Asnsd1	1.12	0.72	0.95	1.16	0.9	1.25	1.13	0.72	1.85	1.33	1.47	1.76	1.03	0.89	1.37	1.37	8.33	6.21	8.16	7.84	1.43	1.34	1.56	1.4	1.16	0.87	1.55	1.38
Nabp1	2.33	1.27	2.46	2.32	2.36	2.23	3.48	2.38	5.49	5.6	6.45	6.55	3.74	3.33	3.9	3.58	23.99	24.25	26.47	24.67	4.18	3.36	6.56	3.63	7.13	6.56	6.44	5.86
Cnga3	0	0	0	0	0	0	0	0	1.92	1.45	1.24	1.45	0.08	0.06	0.14	0	0.21	0.32	0.32	0.42	0.02	0	0	0	0	0	0	0
Zap70	2.54	0.54	3.83	2	0.26	0.14	0.15	0.1	0.64	0.71	0.57	0.64	31.63	30.03	41.78	20.61	1.22	0.96	0.95	1.5	0.42	0.26	1.06	0.27	0.39	0.24	0.28	0.13
Col9a1	0.06	0.02	0.35	0.1	0.12	0.08	0.16	0.12	0.41	0.4	0.32	0.14	0.04	0.12	0.24	0.03	0.98	1.28	1.08	1.14	0.08	0.11	0.17	0.04	0.02	0.07	0.08	0.02
Fam135a	5.41	3.6	7.87	8.75	5.96	8.39	9.1	8.03	8.13	7.03	9.61	9.47	5.71	7.06	6.39	6.02	45.77	44.28	47.45	51.13	8.06	7.99	8.51	9.27	10.09	9.58	8.97	9.83
Smap1	14.78	7.06	17.39	14.83	13.71	15	15.58	11.8	21	22.59	22.19	21.76	19.13	18.17	19.68	18.04	83.09	85.1	97.2	78.95	18.83	17.02	18.25	17.77	17.67	18.07	17.08	16.83
Sphkap	0.04	0.03	0.06	0.05	0.06	0.12	0.13	0.12	0.14	0.05	0.27	0.09	0.03	0.27	0.03	0.05	20.64	18.47	18.28	22.26	0.13	0.09	0.06	0.17	0.15	0.06	0.1	0.08
Plcd4	0.19	0.13	0.22	0.25	0.16	0.39	0.48	0.34	7.08	6.74	8.69	5.94	0.36	0.49	0.51	0.27	29.67	31.21	29.09	33.93	0.56	0.51	0.27	0.69	0.25	0.33	0.3	0.22
Vil1	0.15	0.1	0.02	0	0	0.08	0.04	0	48.95	48.57	49.88	49.34	1.48	2.18	2.34	1.13	0.09	0.16	0.05	0	0.04	0.06	0.12	0.05	0.06	0.11	0.02	0
Tnp1	2.45	4.54	2.79	4.11	4.41	10.43	10.26	5.31	1.41	3.18	5.42	1.34	12.01	18.7	5.59	5.21	1700.4	1376.95	1153.87	1271.37	12.99	10.05	7.62	10.13	0.14	0	0	0.69
Fn1	5.05	2.87	7.03	5.73	8.35	12.23	15.02	7.63	12.83	16.36	11.23	12.25	7.22	5.24	5.67	5.81	3.75	3.95	3.5	3.48	41.28	40.39	68.19	39.04	95.26	75.83	87.26	107.32
Bard1	0.28	0.12	0.36	0.39	0.16	0.09	0.21	0.17	0.64	0.7	0.86	1	0.33	0.38	0.39	0.48	5.44	5.04	5.74	6.04	0.27	0.4	0.45	0.29	0.75	0.46	0.8	0.66
Glb1l	13.53	5.66	10.33	9.21	7.64	7.21	9.19	6.06	26.21	25.46	31.21	27.59	6.41	6.7	7.86	6.67	61.81	58.1	63.7	64.91	9.21	9.3	9.74	8.46	9.35	8.57	9.5	8.41
Speg	2.62	0.65	2.04	1.48	0.89	0.99	1	0.41	3.33	3.67	3.75	3.05	0.93	0.83	1.19	1.19	0.09	0.12	0.08	0.14	3.45	3.92	4.67	3.71	19.08	19.7	20.8	13.92
Des	20.41	11.61	27.53	22.46	16.48	18	13.71	7.82	21.7	20.2	19.88	18.3	18.46	18.85	25.5	27.41	1.87	1.98	1.71	2.11	171.34	213.66	136.23	150.58	414.94	346	375.62	353.14
Slc16a14	0.26	0.1	0.07	0.2	0.2	0.1	0.36	0.02	3.71	4.31	3.83	3.45	0.17	0.21	0.55	0.02	1.22	1.1	0.61	1.47	0.02	0.07	0.1	0.07	0.04	0.1	0.1	0.21
4933407L21Rik	0.06	0	0.08	0.09	0	0	0.08	0	3.6	2.6	4.04	3.9	1	0.74	1.06	0.53	0.3	0.45	0.21	0.27	0.04	0.04	0.07	0.02	0.28	0.14	0.45	0.21
Spata3	29.57	17.25	27.92	30.23	1.51	2.93	2.09	1.94	1.23	1.73	5.76	1	16.32	19.15	16.11	18.28	210.09	192.79	171.6	175.38	3.99	3.85	3.19	4.39	0.68	0.18	0.06	1.42
2810459M11Rik	18.89	6.53	16.61	13.73	0	0	0	0	0.1	0.1	0.08	0.06	55.89	59.34	56.52	42.06	0.13	0.06	0.11	0.05	0	0	0	0	0	0	0.02	0.02
Epha4	1.75	0.34	2.01	1.28	0.38	0.32	0.59	0.41	2.74	2.95	3.11	3.56	9.94	9.45	11.86	7.84	0.08	0.15	0.09	0.16	0.99	0.67	1	1.01	2.32	2.72	2.86	2.75
Nmur1	0	0.05	0	0.04	0.13	0.04	0.04	0	0.31	0.13	0.13	0.04	0	0	0.04	0	5.48	5.18	4.58	5.47	0.04	0.15	0.1	0	0.04	0	0.04	0
Alppl2	5.76	0.8	3.41	3.1	17.24	18.6	21.04	13.23	0.16	0.44	0.15	0.12	0.43	0.49	0.79	0.6	0.99	0.66	0.34	0.99	13.14	13.49	7.08	10.15	5.01	4.46	4.21	5.02
Serpine2	1.82	0.52	1.66	1.83	4.02	7.47	4.28	3.01	7.56	7.35	8.82	7.14	3.59	3.32	3.33	2.76	0.53	0.6	0.43	0.57	183.09	180.82	90.54	159.58	21.84	15.61	18.09	22.13
Efhd1	4.1	1.36	4.48	4.08	8.05	7.75	7.64	6.23	7.96	10.27	13.97	11.27	2.79	4.28	2.77	3.38	222.31	226.9	217.93	219.12	5.64	5.12	4.02	4.86	3.66	5.11	3.28	3.48
Ngef	3.91	2.23	3.86	2.37	2.07	2.55	1.89	1.24	24.01	21.78	24.12	22.18	2.32	2.41	2.89	4.27	0.28	0.23	0.25	0.4	9.09	8.04	5	8.43	4.08	4.57	4.57	5.22
Agxt	0	0	0	0.04	0	0	0	0	0.13	0.21	0.16	0.13	0	0	0.04	0	0	0.03	0.04	0	0	0	0	0	0	0	0	0
Pask	2.18	0.67	1.76	1.71	1.03	1.18	1.23	1.13	2.37	2.15	4.34	2.54	1.57	1.65	1.86	1.39	41.25	39.74	44.16	46.25	1.62	1.58	1.24	1.53	2.01	1.79	2.34	2.01
Thap4	5.55	1.52	4.2	3.74	4.63	4.43	4.44	2.97	6.57	6.84	7.4	7.15	5.1	4.87	5.09	4.73	24.24	22.75	24.88	24.61	3.79	3.44	3.37	3.38	4.93	4.31	4.92	5.23
Inpp5d	10.41	3.74	16.19	7.34	2.38	2.44	3.32	1.5	6.22	5.32	5.34	4.89	98.42	105.18	99.13	84.43	5.87	5.39	4.97	5.8	3.54	3.3	19.57	3.02	5.27	4.69	4.52	4.5
Lrrfip1	3.22	2.76	4.24	3.56	3.02	3.41	3.49	2.2	13.09	14.64	13.8	13.97	4.34	4	5.49	4.44	0.61	0.63	0.45	0.62	10.04	10.43	15.34	11.05	32.28	30.5	32.47	30.8
Asb1	2.34	0.76	1.89	1.68	1.24	1.19	1.47	0.82	3.32	2.98	3.79	3.24	4.2	4.56	4.85	3.4	20.28	18.15	18.3	22.07	2.24	2.21	1.98	1.94	6.97	6.42	7.17	5.66
Tnfrsf11a	1.38	0.35	1.12	1.1	1.09	1.28	1.56	0.71	2.92	2.8	2.48	2.56	1.03	1.03	1.24	1.22	0.22	0.11	0.14	0.36	2.43	2.4	6.71	2.15	9.51	9.49	8.7	9.28
Htr4	0	0	0.01	0	0.01	0.03	0	0	0	0	0	0.01	0	0	0	0	0	0.01	0	0	0.09	0.13	0.02	0.08	0	0	0.01	0
Lypd1	0.01	0.05	0.05	0.07	0	0	0.01	0	0.07	0.3	0.14	0.13	0.04	0.08	0.01	0.02	0.02	0	0.02	0.01	0	0.01	0.02	0	2.55	2.64	2.28	4.21
Tmem163	0.03	0	0.03	0.04	0.2	0.25	0.33	0.03	0.06	0.02	0.04	0	0.02	0	0.05	0.02	0.08	0.06	0.05	0.1	0.03	0.03	0.06	0.03	0	0.04	0.04	0.02
Acmsd	0	0	0.04	0.02	0.02	0	0	0	0	0	0	0.02	0	0	0	0	0.06	0.02	0.12	0.04	0.02	0	0	0	0	0.02	0.02	0
Rgs18	0.09	0.04	0.14	0.13	0.25	0.46	0.33	0.44	0.13	0.13	0.31	0.38	0.03	0.17	0.12	0.06	0	0.05	0.05	0.12	0.52	0.75	1.59	0.5	0.25	0.33	0.52	0.81
F13b	0	0	0	0	0	0.05	0	0	0.32	0.44	0.35	0.49	0	0	0	0	0	0.06	0.05	0.1	0	0	0	0	0	0	0	0
Sctr	0	0.04	0.09	0.06	0.03	0.12	0.19	0	2.51	1.91	2.42	2.72	0.14	0.09	0.36	0.06	0.54	0.38	0.38	0.47	0.09	0.06	0.08	0.06	0.09	0.1	0.06	0.04
Steap3	1.47	0.38	0.96	0.87	1.23	1.37	1.9	0.94	8.89	8.52	8.37	8.24	1.4	1.42	1.04	0.64	0.55	0.54	0.49	0.6	2.06	2.02	5.87	1.76	2.89	3.03	2.89	3.14
Ptprc	1.45	0.96	2.2	2.24	3.11	3.18	5.1	3.45	3.53	3.14	3.56	2.76	2.82	3.38	2.65	2.5	0.48	0.52	0.37	0.63	5.1	4.44	30.52	4.65	7.3	6.46	5.98	6.59
C4bp	370.45	125.26	275.98	375.42	78.74	65.99	76.43	62.64	0.85	0.64	0.55	1.02	132.7	138.82	141.47	106.91	0.06	0.05	0.06	0.08	3.81	1.77	4.15	2.45	8.83	8.27	7.52	7.54
Cacna1s	0	0	0.02	0.01	0.04	0.03	0.01	0.04	0.04	0.06	0.16	0.04	0.03	0.01	0	0.01	1.82	1.94	1.84	1.54	0.32	0.24	0.03	0.07	0.03	0	0	0.02
Pigr	0.03	0.02	0.12	0.08	0	0	0.06	0.03	1.42	1.48	0.88	2.1	0.11	0.06	0.06	0	0.03	0.07	0.01	0.14	0.09	0.02	0.04	0.04	0.03	0.1	0.05	0.04
Tnni1	0.11	0	0.03	0.03	0.06	0.17	0.03	0	0.1	0.06	0.06	0.12	0.1	0.03	0.03	0	0.2	0.17	0.05	0.33	1.07	0.73	0.25	0.44	0.2	0.03	0.14	0.07
Il24	0.2	0	0.05	0.05	0	0	0	0	0	0	0	0	0.95	1.11	0.72	0.21	0	0	0	0	0	0	0	0	0	0	0	0
Csrp1	74.62	32.76	86.17	75.67	65.38	55.2	48.64	30.09	88.3	78.09	71.78	82.21	67.7	69.18	80.49	83.69	8.92	9.33	10.9	10.87	371.04	431.58	310.42	328.43	1189.16	1087.27	1215.94	1162.12
Ube2t	0.42	0.09	0.39	0.42	0.18	0.13	0.2	0.1	0.3	0.41	0.55	0.46	0.39	0.33	0.4	0.37	13.02	13.59	13.7	13.76	0.46	0.16	0.65	0.29	0.56	0.45	0.23	0.37
Slc45a3	5.72	1.16	5.35	3.19	1.1	0.77	1.09	0.61	9.78	8.73	10.15	7.45	47.19	48.6	51.16	36.83	1.63	1.81	1.97	2.23	0.87	0.67	1.16	0.44	2.67	2.38	2.84	2.14
Lrrn2	3.27	0.91	2.46	1.61	1.24	1.15	1.41	0.71	2.37	2.31	2.09	2.51	8.43	6.3	6.25	5.98	0.33	0.16	0.19	0.16	1.85	1.98	2.25	2.03	2.14	2.9	2.24	2.02
Syt2	4.78	1.65	3.17	2.55	0.11	0.14	0.27	0.1	9.72	9.22	9.52	7.44	4.37	4	4.68	4.6	0.08	0.07	0.06	0.08	0.07	0.12	0.04	0.1	0.05	0.04	0.13	0.09
Lhx4	0.13	0.15	0.36	0.12	0.02	0.03	0.06	0.01	0.01	0.02	0.01	0.04	0.11	0.42	0.15	1.32	0.07	0.05	0.04	0.1	0	0.01	0.01	0	0	0.01	0.02	0
Glul	2017.96	1032.49	1972.95	2263.48	175.75	183.81	173.24	120.19	2424.45	2396.52	2504.92	2279.86	344.55	412.02	376.38	590.56	165.27	164.78	153.08	163.63	193.99	195.51	182.96	191.48	90.72	86.55	85.72	100.8
Ncf2	32.45	14.86	38.17	19.63	1.1	0.87	1.29	0.65	2.11	1.9	1.74	1.65	59.91	61.24	59.26	63.83	0.12	0.14	0.2	0.16	1.27	1.17	11.43	1.47	1.52	1.36	1.17	1.4
Fam129a	4.53	1.66	4.07	3.53	10.15	9.54	12.16	7.16	22.98	22.29	22.63	22.73	11.56	11.05	11.16	7.5	7.24	6.71	7.19	8.41	19.57	20.1	12.38	14.93	232.47	229.97	263.03	244.29
Kif26b	1.2	0.48	0.95	0.71	0.72	1.24	1.13	0.52	5.44	5.44	5.52	5.54	3.28	2.51	3.02	2.14	0.21	0.18	0.18	0.24	7.54	6.36	5.47	5.61	11.28	10.92	12.34	10.58
Cnih3	0.04	0	0.02	0.05	0.48	0.23	0.48	0.27	0.38	0.17	0.38	0.44	0.03	0	0	0	0.04	0	0.04	0.04	0.04	0.07	0.06	0	0.07	0.05	0.12	0.11
Wdr64	0.22	0.22	0.35	0.34	0.57	0.38	0.65	0.39	0.11	0.05	0.42	0.09	0.22	0.28	0.18	0.25	58.3	54.25	52.25	56.78	0.85	0.77	0.8	1.08	0.1	0	0	0.22
Opn3	0.47	0.12	0.55	0.37	0.67	0.52	0.61	0.35	0.93	0.59	1.07	1.5	1.06	1.02	0.83	0.69	4.68	4.98	6.26	5.66	0.68	0.58	0.8	0.35	0.72	0.77	0.62	0.43
Spta1	0	0.02	0	0.01	0.01	0.04	0.05	0.07	0.07	0.04	0.13	0.06	0.04	0.02	0.04	0.05	3.42	3.54	3.6	3.78	0.04	0.06	0.08	0.04	0.03	0	0.01	0.04
Cfap45	1.16	0.62	0.86	0.9	0.21	0.64	0.37	0.45	16.28	16.46	16.86	14.39	1.23	1.37	1.19	1.2	32.19	41.11	45.12	31.61	0.67	0.68	0.45	0.65	0.13	0.12	0.09	0.09
Dusp27	1.12	0.75	0.89	0.62	0	0	0	0	0.03	0.05	0.05	0.02	0.35	0.52	0.18	0.66	0.03	0.01	0.05	0.1	0.18	0.04	0.07	0	0	0.07	0.03	0
Mpzl1	22.99	6.41	20.42	16.9	8.55	8.12	9.81	6.43	20.94	19.5	20.66	19.04	58.05	51.89	67.25	47.64	14.04	13.94	17.35	15.11	6.44	6.69	10.14	6.99	11.49	11.18	13.77	13.01
Adcy10	0.45	0.16	0.38	0.23	0.33	0.74	0.75	0.65	0.7	0.34	2.53	0.51	0.33	0.66	0.26	0.4	87.19	86.91	93.88	88.4	0.91	0.79	0.54	0.92	0.27	0.16	0.08	0.34
Dcaf6	8.52	4.94	8.91	10.96	11.2	11.47	13.43	10.99	12.56	12.6	13.92	13.2	10.74	12.32	10.23	9.95	64.96	65.14	63.53	63.74	8.66	8.69	8.44	9.53	11.63	12.15	11.29	12.2
Tbx19	0.11	0.06	0.04	0.29	0.15	0.14	0.27	0.21	0.03	0.02	0.12	0	0	0.11	0	0	3.61	3.23	3.21	3.27	0.51	0.33	0.36	0.4	0.07	0.03	0	0.2
Atp1b1	34.37	14.25	30.98	34.12	87.19	81.08	85.39	62.23	261.35	259.47	246	278.43	28.47	33.13	30.85	26.91	12.43	11.59	12.39	14	25.05	24.13	19.64	26.66	36.82	34.28	32.76	32.13
Ccdc181	4.94	5.19	5.96	5.41	4.04	5.69	5.51	4.69	31.19	35.05	30.5	29.33	8.5	10.03	7.99	6.29	119.36	122.37	94.7	122.29	4.03	3.44	3.44	4.26	3.62	3.77	3.54	3.85
Kifap3	7.32	4.28	10.43	9.34	4.2	4.97	5.09	4.52	16.04	13.55	17.36	15.97	9.38	10.58	9.13	9.23	87.13	92.61	98.58	89.33	6.91	7.4	8.61	6.91	14.21	16.69	14.35	15.66
Prrx1	11.5	7.04	20.76	11.67	2.83	2.85	4.15	2.94	3.77	3.41	4.15	3.59	30.91	36.26	29.79	35.15	0.33	0.35	0.54	0.44	6.02	5.38	9.39	5.47	8.43	9.95	8.78	10.45
Tex35	0.26	0.59	1.46	1.13	0.7	0.82	0.91	0.24	0.37	0.8	1.47	0.5	0.77	1.75	0.4	0.97	173.26	162.53	143.42	149.29	1.23	1.09	1.39	3.13	0.14	0	0.14	0.08
Axdnd1	0.28	0.43	0.5	0.72	0.52	0.94	0.59	0.85	0.53	0.39	1.69	0.47	0.53	0.7	0.34	0.25	61.12	60.17	50.9	64.82	0.69	0.62	0.66	1.2	0.12	0.24	0.16	0.42
Cenpf	0.28	0.18	0.44	0.42	0.29	0.39	0.41	0.34	0.64	0.95	1.51	0.78	0.94	1.12	1.15	0.69	22.78	21.63	17.11	24.75	0.64	0.63	0.78	0.52	0.49	0.53	0.46	0.72
Ush2a	0.06	0	0.03	0.05	0.05	0.04	0.07	0.02	0.06	0.01	0.17	0.05	0.03	0.07	0.01	0.03	4.96	4.24	4.59	4.85	0.07	0.08	0.08	0.17	0.02	0.02	0.02	0
Esrrg	4.31	2.48	4.56	4.47	3.34	4.49	4.22	3.61	13.75	14.03	14.6	12.99	1.15	1.77	1.47	2.22	0.18	0.17	0.17	0.24	3.49	3.4	2.81	3.75	2.35	2.38	2.01	2.82
Spata17	1.22	0.49	1.5	2.15	1.7	1.01	1.03	1.39	19.82	16.32	21.27	19.68	2.03	1.95	1.3	1.1	61.17	63.46	65.16	57.63	2.25	2.11	1.16	2.17	0.81	0.73	0.6	1.21
Slc30a10	0	0	0.02	0.01	0	0	0	0	0.02	0	0.02	0.03	0.02	0.05	0.02	0.01	0.03	0	0	0	0	0	0.01	0	0	0	0.01	0
Marc1	0.25	0	0	0.06	0.3	0.15	0.21	0.05	6.04	5.5	6.63	4.99	0.2	0.37	0.62	0.59	0.05	0	0.08	0.05	0.19	0.05	0.15	0.16	0.2	0.25	0.2	0.35
Nek2	1.07	0.35	0.72	0.54	1.02	0.95	1.34	0.74	4.17	4.36	5.17	4.58	1.34	1.88	1.46	0.78	64.93	68.03	54.08	78.34	1.28	1.22	1.54	1.63	0.93	0.7	1.13	1.02
Atf3	2.54	0.88	2.55	2.39	0.91	0.72	0.89	0.47	1.41	2.23	1.48	1.94	0.32	0.2	0.43	0.96	0.06	0.15	0.05	0.03	4.8	3.96	20.87	3.76	2.31	2.08	1.53	1.36
Batf3	0.32	0.14	0.21	0.23	0.41	0.34	1.15	0.7	3.7	2.92	4.03	2.82	0.5	0.62	0.16	0.63	0.1	0.05	0.05	0.05	1.7	1.16	3.14	0.81	0.79	0.72	0.17	0.54
Acbd7	8	2.57	9.13	6.37	104.75	152.84	144.12	133.53	0.77	1.24	0.48	0.37	0.79	1.07	0.69	1.07	0.82	0.38	0.51	1.11	213.02	188.65	140.63	198.59	38.92	30.73	33.7	20.39
Suv39h2	0.37	0.32	0.35	0.67	0.15	0.14	0.22	0.17	0.49	0.21	0.56	0.24	0.23	0.34	0.31	0.39	8.3	8.49	10.84	8.89	0.34	0.35	0.42	0.25	0.3	0.43	0.39	0.31
Cfap126	4.42	3.32	3.76	3.78	2.18	3.68	2.57	2.67	35.04	46.81	32.54	34.01	5.62	5.47	3.6	3.97	70.92	74.35	63.46	53.17	3.83	3.29	2.4	3.36	4.49	3.29	4.14	4.5
Meig1	0.84	2.27	4.03	4.91	5.37	7.78	7.21	7.2	13.75	15.45	24.92	14.02	6.54	12.14	3.72	4.21	992.23	956.55	974.62	841.72	5.11	6.72	3.97	10.47	0.27	0.19	0.18	0.32
Mcm10	0.21	0.05	0.29	0.08	0.13	0.15	0.18	0.05	0.8	0.54	1.01	0.71	0.52	0.55	0.9	0.31	2.09	2.14	2.29	2.21	0.32	0.23	0.5	0.24	0.43	0.45	0.59	0.65
Ddr2	5.7	2.6	5.81	5.97	6.41	6.66	7.71	5.06	12.75	12.8	11.49	14.42	4.94	5.71	5.73	4.95	1.26	1.14	1.34	1.62	11.79	11.67	11.52	10.37	31.3	33.36	31.64	33.84
Ccdc3	0.22	0.03	0.11	0.1	0.43	0.35	0.21	0.1	18.87	17.93	18.16	23.66	1.44	1.37	1.42	0.71	0.63	0.63	0.43	0.6	0.51	0.66	0.97	0.69	3.13	3.6	2.18	3.4
Enkur	1.83	1.78	2.08	2.89	0.75	0.89	1.2	1.15	35.81	37.72	38.58	34.7	3.21	5.77	2.95	1.74	101.89	106.33	104.77	90.67	1.13	1.17	0.79	2.15	0.42	0.11	0.26	0.69
Nuf2	0.24	0.14	0.33	0.15	0.21	0.27	0.2	0.18	0.46	0.24	0.82	0.4	0.31	0.71	0.67	0.28	24.67	24.17	22.69	25.15	0.35	0.39	0.76	0.39	0.47	0.41	0.35	0.56
Fmo3	0.46	0.11	0.62	0.25	6.63	10.87	10.28	8.61	1.37	2.2	0.81	0.57	0.58	0.56	0.66	0.31	0.08	0.03	0.03	0.06	15.66	16.46	10.21	19.14	9.05	7.53	8.34	8
Cenpl	0.44	0.17	0.42	0.58	0.41	0.28	0.37	0.31	1.16	1.38	1.7	1.04	0.54	0.78	0.57	0.69	3.62	3.46	3.47	4.38	0.47	0.35	0.68	0.41	0.87	0.41	0.72	0.86
Cubn	0.01	0.01	0.02	0.03	0	0.02	0.01	0	1.28	1.13	0.91	2.32	0.04	0.05	0.04	0.06	0.51	0.47	0.49	0.41	0.01	0.01	0.02	0.02	0.06	0.02	0.03	0.01
Pter	0.65	0.41	0.47	0.86	0.92	0.94	1.13	0.8	4.17	4.24	4.87	4.8	0.65	0.45	0.62	0.66	0.2	0.2	0.29	0.28	1.41	1.41	1.47	1.44	1.6	1.46	1.58	1.56
4930426L09Rik	0.33	0.1	0.4	0.53	0.31	0.04	0.08	0.11	0.28	0.23	0.26	0.27	0.05	0.12	0.13	0.09	2.66	2.98	3.06	2.92	0.12	0.04	0.4	0.15	0.3	0.46	0.13	0.21
Mllt10	13.53	6.42	13.17	13.42	10.74	11.69	13.64	10.44	15.23	15.2	15.44	15.03	9.91	11.84	11.14	10.58	72.7	70.03	69.25	82.7	13.66	12.72	12.34	12.46	14.6	15.64	14.16	13.93
Nek6	0.48	0.29	0.76	0.56	0.57	0.47	0.7	0.36	5.54	5.35	5.92	6.44	1.08	1.02	1.23	0.81	0.46	0.29	0.38	0.46	0.75	0.96	1.77	0.75	1.99	1.86	1.96	1.71
Kif5c	2.18	1.25	1.19	1.76	3.82	3.32	4.39	3.34	2.32	2.17	2.87	2.32	0.53	0.4	0.41	0.47	3.88	3.82	3.06	3.94	2.87	3.03	1.67	2	179.38	184.97	199.82	148.16
Lypd6b	0.73	0.17	0.38	0.53	0.45	0.33	0.41	0.27	0.21	0.23	0.45	0.28	0.15	0.27	0.35	0.28	0.41	0.38	0.43	0.47	0.41	0.36	0.23	0.42	1.81	2.6	2.85	2.14
4931423N10Rik	0.29	0.08	0.25	0.07	0.24	0.24	0.06	0.24	0.04	0	0.38	0.25	0.11	0.53	0.2	0.03	27.43	25.19	26.99	26.57	0.22	0.29	0.4	0.4	0.07	0.04	0	0.2
Prkcq	0.97	0.37	0.63	0.79	1	1.75	1.69	1	1.26	1.83	2.4	1.13	0.48	0.39	0.26	0.4	44.69	45.58	46.36	41.89	3.19	2.4	2.48	2.61	0.95	0.76	0.41	1.46
Mastl	0.37	0.37	0.59	0.68	0.24	0.17	0.27	0.25	0.43	0.53	0.53	0.54	0.73	0.6	0.72	0.6	3.91	3.31	4.2	3.81	0.31	0.42	0.68	0.49	0.73	0.58	0.84	0.73
Odf2	21.33	11.52	17.49	19.33	19.09	22.94	24.98	16.05	34.7	31.22	45.37	30.65	17.79	19.67	17.04	16.21	468.23	530.09	390.71	548.9	28.63	26.73	24.3	30.41	19.74	16.51	16.34	16.43
Coq4	4.12	1.44	3.61	3.39	2.19	2.02	2.52	1.46	7.39	7.76	6.93	6.86	2.91	2.79	3.47	3.09	18.03	17.89	18.43	17.49	3.95	3.04	2.17	2.94	3.78	3.75	4.04	3.28
Barhl1	0.05	0.02	0	0	0.04	0.03	0	0.02	2.28	2.25	2.11	1.78	0	0.17	0.05	0.09	0.04	0.08	0.07	0.06	0	0	0.01	0	0	0	0	0
Ak8	1.86	0.73	1.26	0.78	39.02	25.35	33.32	22.7	13.48	15.02	16	15	2.05	2.15	1.56	1.45	121.27	115.45	129.9	114.12	1.21	1.46	2.43	1.61	0.16	0.17	0.4	0.05
Spaca9	1.36	0.55	0.83	0.37	26.95	19.12	23.68	16.67	10.95	12.01	13.73	8.57	2.1	3.27	1.48	1.63	249.7	228.47	234.1	226.41	1.95	1.09	3.48	2.32	0.45	0	0.36	1.18
Gfi1b	0.26	0.04	0.41	0.6	6.95	4.66	5.8	4.82	0.11	0.04	0	0	0	0.09	0.07	0.03	0.33	0.37	0.42	0.29	0.1	0	0.12	0.4	0.14	0.04	0	0
Ak1	28.04	10.83	27.06	18.86	1.76	1.83	2.28	1.59	30.76	26.99	31.33	26.11	5.84	8.44	7.67	13.16	66	74.65	69.08	65.72	6.72	5.67	6.54	5.53	12.86	10.97	12.35	12.06
Lcn2	704.73	544.62	1359.95	752.96	55.54	43.54	54.72	39.31	573.65	612.12	485.53	553.48	3685.71	3383.78	3660.19	3857.04	106.7	108.59	105.86	120.56	91.31	75.19	37.72	56.31	21.84	16.02	23.62	35.63
Kcnj3	0.51	0.06	0.23	0.27	0.85	0.77	0.96	1.2	0.03	0	0	0	0.16	0.03	0.12	0.4	0.05	0.02	0	0	0.31	0.22	0.07	0.25	0.02	0.03	0.01	0
Gpd2	3.63	1.32	3.65	3.36	5.65	4.54	5.75	3.95	4.56	4.29	5.63	5.17	5.36	5.98	4.99	5.12	85.4	81.15	73.54	86.7	4.64	4.23	4.08	3.88	13.86	12.46	14.31	12.45
Galnt5	0.08	0.02	0.11	0.05	0.15	0.15	0.2	0.07	0.08	0.09	0.11	0.14	0	0.03	0.03	0.01	0	0	0	0	0.46	0.43	0.5	0.49	0.85	0.52	0.6	0.43
Acvr1c	0.28	0.12	0.38	0.25	0.15	0.34	0.44	0.22	1.24	1.74	1.51	3	0.28	0.31	0.27	0.28	0.14	0.15	0.11	0.15	0.19	0.03	0.03	0.03	1.16	1.57	0.91	0.3
Fibcd1	1.46	0.13	0.42	1.01	0.01	0.16	0.06	0	0.03	0.03	0	0	0	0	0	0	0.22	0.2	0.21	0.19	0	0	0.08	0.01	0.08	0	0.07	0.02
Crat	6.61	2.56	4.74	4.72	9.77	10.01	10.21	5.95	13.82	14.99	17.39	14.8	6.79	6.98	5.2	5.3	172.24	168.69	164.68	170.92	10.04	9.36	10.44	8.75	11.4	10.5	11.9	10.56
Kynu	0.13	0	0	0	0.05	0.13	0.04	0.02	0.07	0.05	0.37	0.09	0.28	0.21	0.07	0.11	0	0	0.04	0	0.11	0.02	0.48	0.2	0.47	0.62	0.65	0.57
Cutal	4.17	1.14	3.16	4.14	31.47	24.56	29.34	19.76	16.99	15.96	18.14	16.24	1.17	1.13	1.63	1.05	0.02	0.13	0.05	0.08	12.95	11.6	8.78	12.3	14.25	15.9	12.97	16.94
Phf19	5.03	1.69	2.98	4.06	34.82	34.3	37.92	22.8	0.8	0.58	0.91	0.77	0.24	0.23	0.21	0.19	0.09	0.05	0.03	0.11	21.76	24.58	15.72	26.57	3.83	3.98	3.02	2.91
Ttll11	1.76	0.46	1.43	1.33	1.46	1.55	1.87	1.27	2.73	2.29	3.44	2.64	0.88	0.83	1.15	0.7	17.11	16.22	16.84	15.71	1.6	1.7	1.27	1.8	2	1.43	2.07	1.75
Lhx6	2.78	1.12	1.05	1.86	11.04	13.72	12.92	8.11	0.41	0.82	0.48	0.84	0.28	0.23	0.14	0.16	0.6	0.38	0.53	0.34	6.1	5.18	3.08	5.15	0.7	0.71	0.57	0.56
Morn5	0.91	0.32	0.49	1.17	0.9	2.27	1.63	1.01	14.17	12.87	18.64	13.59	2.06	2.24	2.22	1.33	210.53	232.57	240.09	213.04	1.49	1.39	0.89	2.43	0.09	0.09	0.09	0.53
Agpat2	15.83	6.66	14.31	16.63	17.19	18.45	19.63	11.83	22.82	27.26	19.98	25.28	10.29	9.9	13.36	11.72	62.77	61.78	54.16	61.26	5.76	4.64	7.49	3.8	6.16	6.54	6.5	5.5
1700019N19Rik	1.09	0.54	1.36	0.85	0.78	2.54	1.8	1.46	0.49	0.94	5.99	0.79	1.42	1.98	0.87	1.09	307.89	313.26	292.21	279.29	2.23	2.38	1.4	2.62	0.38	0.07	0.32	0.46
Camsap1	9.62	4.22	8.63	7.2	6.77	6.37	7.11	5.13	9.08	9.44	11.32	9.06	7.42	7.27	7.95	7.41	59.49	55.21	54.22	61.49	7.64	7.23	6.28	7.82	10.8	11.65	12.18	11.15
Lcn3	0	0	0.25	0	0	0	0	0	0	0.1	0	0	2.56	2	2.86	1.2	0.16	0	0	0	0	0	0	0	0	0	0	0
Lcn5	6752.91	3934.02	5825.02	8014.28	14.04	18.3	4.45	0.56	4.42	0	0	0.09	36.09	47.37	35.42	68.22	0	0	0	0	0.34	0.17	9.12	4.51	2.35	1.92	2.41	1.4
Fcna	9.72	4	8.53	6.49	2.85	3.36	2.62	2.45	1.39	1.2	0.61	2.18	17.77	19.71	15.68	13.21	0.12	0.07	0.08	0	6.41	5.33	4.93	5.46	6.95	3.79	3.07	3.06
Lcn12	344.14	179.94	323.85	310.56	77.31	90.53	88.46	66.72	2.86	2.31	2.77	1.73	17.2	41.58	19.26	106.13	0.23	0.07	0.15	0.17	239.22	243.52	161.17	241.85	1.58	2.52	2.08	3.25
Neb	0.06	0.07	0.15	0.06	0.04	0.05	0.1	0.03	0.07	0.1	0.1	0.11	0.09	0.09	0.12	0.07	0.18	0.11	0.17	0.23	3.51	3.17	1.37	1.75	6.59	5.68	6	5.32
Sapcd2	0.49	0.1	0.54	0.23	0.08	0.08	0.02	0	0.2	0.13	0.27	0.21	2.22	1.48	2.56	2.05	0.21	0.21	0.16	0.11	0.08	0.08	0.32	0.09	0.22	0.04	0.4	0.07
Lrrc26	0.2	0.13	0	0.16	17.94	8.92	10.84	7.98	0.75	0.44	0.97	0.22	0	0	0.05	0.05	1.01	0.95	1.33	0.75	1.19	1.38	0.49	0.71	0	0	0.05	0
Fam166a	1.69	0.47	1.24	1.48	1.03	1.67	1.82	1.52	1.15	0.71	2.96	0.87	0.87	1.83	0.87	0.9	180.51	173.46	157.89	148.71	2.05	1.72	0.56	1.94	0.5	0.71	0.22	0.6
Il1rn	0	0	0.02	0.03	0	0	0	0	0	0.05	0.03	0	0.16	0.04	0.02	0.05	0	0	0	0	0.05	0.02	16.42	0.02	0	0.03	0.02	0.09
Dapl1	1.97	2.19	0.96	1.45	55.76	58.49	66.72	69.48	0	0	0.19	0	36.72	28.18	20.44	19.17	5.76	6.72	7.39	4.55	2.94	1.33	2.95	2.2	0	0	0	0
Nup35	1.74	0.79	2.16	2.41	2.56	1.93	2.55	1.36	2.19	2.12	3.07	2.93	2.24	2.85	2.32	2.09	19.14	19.53	19.85	20.1	2.2	2.42	2.09	2.04	2.69	2.63	3.07	2.63
Ssfa2	16.82	6.98	18.18	13.69	21.01	21.71	25.73	16.11	18.47	18.93	19.41	17.44	16.48	17.89	18.27	18.84	6.02	5.86	6.73	7.29	31.03	29.7	26.2	27.13	86.54	95.68	91.83	88.79
Xirp2	0	0	0	0	0	0	0	0	0	0	0	0	0	0	0	0	0.01	0	0	0	0.72	0.15	0	0	0	0	0	0
Abcb11	0.05	0.03	0.02	0	0.01	0.01	0.03	0	0.11	0.05	0.1	0.04	0.01	0.01	0.02	0.04	0.53	0.71	1.12	0.89	0.05	0.01	0.06	0.06	0.32	0.41	0.2	0.31
Lrp2	6.73	1.7	3	3.43	56.22	58.61	67.96	44.68	206	180.91	196.45	194.86	8.79	9.35	11.32	5.35	0.2	0.24	0.19	0.25	115.88	109.93	62.73	110.34	18.19	17.01	15.61	15.12
P2rx3	2.78	0.67	1.99	1.38	2.06	2.21	3.15	1.58	1.25	1.39	1.48	1.08	1.93	2.18	2.26	1.4	41.31	37.03	43.18	42.94	2.25	2.94	1.61	1.92	3.92	4.49	4.66	3.69
Phospho2	5.01	3.25	8.12	8.25	5.37	5.68	7.51	6	3.72	3.38	6.68	4.44	6.53	8.82	6.93	8.4	134.22	135.52	130.23	139.84	6.15	7.05	7.2	7.66	6.96	6.33	6.55	8.04
Chrna1	0	0	0	0	0	0.01	0	0	0.02	0	0	0	0.02	0	0	0	0.05	0.06	0.09	0.07	0	0	0	0	0	0	0	0
Kif18a	0.34	0.09	0.42	0.38	0.25	0.39	0.47	0.35	0.51	0.46	0.79	0.83	0.54	0.54	0.52	0.48	6.95	7.13	6.33	6.6	0.27	0.47	0.76	0.48	0.68	0.74	0.9	0.85
B230118H07Rik	4.47	4.36	8.43	8.95	3.17	4.37	4.38	4.45	8.75	8.29	8.13	10.23	10.71	11.59	10.23	12.27	36.13	35.31	38.07	33.47	6.4	5.85	5.26	5.23	8.37	9.24	8.6	8.82
Pax6	0	0	0	0.04	0	0	0.01	0	0.08	0.07	0.04	0.04	0	0	0.01	0	0.14	0.12	0.21	0.23	0	0	0	0.01	0	0	0	0
Elf5	2.31	0.87	2.21	2.5	0	0.04	0.07	0.14	0.15	0.02	0.08	0.04	0	0.04	0.02	0.1	0.07	0	0.05	0.04	3.52	2.41	2.48	2.22	27.14	25.4	19.84	18.6
Gatm	3.93	2.27	4.81	3.81	1.86	1.54	1.85	1.99	1.92	1.8	2.62	1.85	2.87	3.59	3.99	3.41	39.35	40.78	45.61	41.7	2.82	2.53	6.46	1.99	2.34	2.65	1.56	1.73
Fgf7	0.4	0.57	1.11	0.77	0.6	0.47	0.5	0.68	1.46	1.63	2.27	2.12	0.86	0.88	1.05	0.99	0.12	0.19	0.24	0.27	1.22	1.36	1.64	1.2	5.05	4.29	4.2	5.62
Fam227b	0.06	0.08	0.23	0.38	0.13	0.34	0.44	0.49	0.2	0.2	0.88	0.26	0.28	0.51	0.06	0.19	55.82	50.49	53.49	56.79	0.26	0.32	0.42	0.55	0.03	0.1	0.06	0.04
Meis2	2.39	1.35	3.57	3.08	2.16	2.4	3.15	2.07	3.22	3.26	3.05	2.77	2.57	2.61	3.76	2.86	0.11	0.08	0.1	0.09	9.79	11.52	13.51	9.87	29.13	34.15	34.15	33.3
Tspan18	1.77	0.92	2.03	1.28	1.05	1.05	1.82	0.99	8.57	7.39	8.19	6.49	2.01	2	3.09	2.28	2.59	2.01	2.5	2.55	4.87	6.29	5.55	4.79	17.48	17.3	19.77	15.43
Chst1	0.62	0.17	0.41	0.6	0.46	0.44	0.43	0.39	3.14	4.96	3.22	4.64	0.5	0.66	0.57	0.5	20.28	20.41	21.21	21.86	0.82	0.92	0.75	0.56	2.16	2.64	2.06	1.32
Duoxa1	0.1	0.03	0.16	0.03	0.16	0.1	0.18	0.07	0.03	0.08	0.05	0.11	0.09	0.07	0.02	0.08	0.02	0	0	0	0.29	0.31	0.21	0.34	0.05	0.14	0.03	0.09
Duoxa2	0	0	0	0	0	0.12	0.07	0	0.3	0.29	0.64	0	0	0	0.08	0	0	0	0.07	0.04	0.07	0	0	0	0.12	0.13	0.12	0
Sord	12.92	5.61	10.34	12.25	26.93	30.21	23.3	21.46	104.38	103	121.26	106.95	9.34	13.58	10.15	9.97	549.61	578.05	536.69	562.52	52.26	49.63	37.75	55.95	14.68	10.86	10.34	20.66
Frmd5	0.36	0.05	0.47	0.46	0.11	0.03	0.09	0.03	0.15	0.11	0.09	0.17	5.74	4.51	4.7	3.21	1.07	0.98	0.99	0.95	0.03	0.03	0.09	0.01	0.16	0.16	0.16	0.09
Mdk	2.82	2.89	9.25	4.57	1.95	2.01	2.68	0.89	44.04	39.27	38.91	48.87	4.25	4.88	8.8	5.64	1.97	2.77	2.38	2.02	3.76	3.11	11.89	3.24	2.68	2.34	3.77	3.35
F2	0	0	0.05	0.04	0	0	0.02	0.02	0.28	0.38	0.3	0.41	0	0.02	0	0	0.05	0.03	0.24	0.07	0	0	0.03	0	0	0.02	0	0
Map1a	1.12	0.49	1	0.89	1.03	1.32	1.61	0.66	6.56	6.28	5.64	5.93	1.08	0.81	1.21	0.89	0.76	1.05	1.02	0.96	2.84	2.9	2.33	2.41	9.78	9.95	9.7	7.73
Lamp5	2.46	1.17	2.4	2.03	0.1	0.16	0.17	0.03	0.03	0.03	0.07	0.03	0	0.15	0.03	0.03	1	1.21	0.61	0.85	0.18	0.09	0.27	0.14	0	0.03	0.03	0.04
Mtch2	18.1	7.3	17.98	17.62	16.82	14.83	20.04	14.9	28.8	26.59	29.17	29.92	18.08	20.94	19.06	19.29	98.33	104.55	110.49	102.33	19.95	17.86	23.79	20.42	29.3	25.79	25.76	26.57
Lrrc57	2.81	1.59	5.53	3.92	4.55	5.76	5.39	5.94	2.75	4.14	4.04	3.78	3.42	4.28	4.54	4.29	65.32	66.13	69.27	64.51	8.14	7.25	6.63	7.71	3.9	4.39	3.8	5.36
Ltk	0.06	0.02	0	0.02	0	0	0	0	0.55	0.34	0.71	0.47	0.25	0.24	0.2	0.23	0.02	0.02	0.04	0.13	0	0	0	0	0.02	0	0.04	0.05
Tyro3	0.69	0.15	0.78	0.43	0.16	0.17	0.26	0.19	0.9	0.82	1.22	0.95	5.65	4.25	5.93	3.95	11.36	10.62	10.21	11.77	0.78	0.67	0.6	0.55	2.51	2.12	2.96	2.51
Nusap1	0.52	0.22	0.46	0.67	0.44	0.43	0.68	0.41	1.05	0.77	1.14	0.72	0.89	0.75	1.02	0.41	16.94	14.13	15.23	15.94	0.84	0.45	1.62	0.71	0.8	0.59	1	0.7
Adam33	7.71	1.05	1.9	3.3	1.04	1.43	2.04	0.85	8.05	6.77	5.14	5.59	2.17	1.22	1.93	1.08	0.2	0.16	0.15	0.3	2.13	1.82	1.83	1.32	14.69	16.72	17.31	12.31
Siglec1	4.15	0.86	1.77	2.49	2.46	2.92	4.06	1.8	2.37	2.28	2.26	2.22	1.72	1.32	1.96	1.03	0.21	0.18	0.22	0.3	3.48	2.98	21.05	2.58	3.12	2.4	2.39	2.61
Knl1	0.24	0.19	0.3	0.28	0.12	0.21	0.24	0.25	0.46	0.22	0.8	0.34	0.46	0.66	0.57	0.36	16.89	14.54	15.09	18.39	0.46	0.47	0.87	0.49	0.51	0.4	0.41	0.54
1700037H04Rik	10.81	2.5	7.33	6.58	2.97	3	3.06	1.74	13.2	13.13	15.07	10.87	3.44	4.82	3.67	4.61	125.85	126.85	137.74	128.18	10.66	8.32	7.93	8.98	7.13	6.88	8.14	9.62
Knstrn	0.72	0.58	1.1	0.82	1.27	0.94	0.9	0.89	0.53	0.7	0.93	0.4	0.99	1.33	1.3	1.02	26.5	25.58	22.48	25.8	1.58	1.22	1.75	1.7	0.67	0.59	0.49	0.9
Adra1d	0.25	0	0.18	0	0.17	0.13	0.52	0.17	0.36	0.7	0.44	0.75	0.15	0.12	0	0.03	1.18	1.11	1.32	1.49	2.05	1.76	1	1.09	5.85	6.36	7.81	4.67
Chgb	0.02	0.25	0.04	0.07	0.05	0.11	0.08	0.04	0.02	0	0.09	0.12	0.03	0.02	0.02	0.02	1.77	2.75	2.82	1.88	0.02	0.04	0.04	0.06	0.02	0.02	0	0.03
Tmco5	0.31	0.26	0.2	0.22	0.22	1.07	1.09	1	0.47	0.23	2.42	0.17	0.66	1.08	0.26	0.43	123.28	128.75	119.39	116.97	1.07	0.81	0.82	1.2	0.05	0.11	0	0.13
Fermt1	2.06	0.73	1.67	1.29	1.51	1.28	1.39	1.43	41.91	37.96	40.91	39.8	6.69	6.89	8.28	5.63	0.02	0.04	0.02	0	1.95	1.79	1.37	1.68	1.4	1.54	1.73	1.52
Slc27a2	5.86	2.93	5.47	5.58	1.83	6.87	2.35	2.73	51.19	48.19	45.32	51.06	2.23	2.82	3.47	3.29	0.64	0.44	0.63	0.55	48.08	55.74	26.42	44.73	18.55	13.12	13.52	19.74
Hdc	0.14	0.02	0.09	0.03	0.2	0.12	0.27	0.13	36.36	32.3	33.3	29.98	1.72	2.05	1.99	1.15	5.72	5.73	5.74	5.88	0.22	0.21	0.22	0.2	0.68	1.05	0.74	0.61
Usp50	0.2	0	0.16	0.3	0.09	0.23	0.23	0	0.19	0.19	0.93	0.18	0.23	0.46	0.17	0.12	46.33	49.9	51.08	43.43	0.17	0.25	0.35	0.29	0	0.03	0.03	0.07
Nphp1	10.63	5.28	10.14	9.17	5.6	8.62	6.75	5.73	33.14	30.32	40.6	30.37	10.18	10.45	9.17	9.22	212.07	230.15	214.47	245.92	7.03	8.29	6.22	7.2	7.41	6.97	6.54	6.77
Bub1	0.23	0	0.39	0.34	0.11	0.13	0.19	0.29	0.34	0.19	1.27	0.23	0.29	0.57	0.57	0.63	32.93	30.72	36.47	32.76	0.21	0.27	0.8	0.59	0.33	0.29	0.42	0.48
Acoxl	0.17	0.05	0.06	0.14	0.07	0.29	0.1	0.08	0.05	0.02	0	0.02	1.33	0.86	1.1	0.56	0.06	0.11	0.04	0.12	0.02	0.06	0.07	0.14	0.04	0.02	0.02	0
Fbln7	0.85	0.76	0.83	0.87	0.3	0.41	0.26	0.22	4.96	4.49	4.7	4.86	1.95	1.82	1.91	1.84	0.12	0.1	0.1	0.13	0.27	0.31	0.79	0.33	1.61	1.07	1.4	1.7
1700020A23Rik	0	0	0.24	0	0.09	0	0.23	0.31	0	0.09	0.18	0	0	0	0	0	12.57	11.94	14.23	12.29	0.17	0.08	0.15	0.63	0	0	0	0
Lpin3	5.41	1.98	4.7	2.98	3.93	3.56	4.85	2.71	6.36	5.2	6.77	5.24	17.26	16.12	21	15.76	3.03	2.94	3.3	3.37	4.28	4.39	3.14	3.97	6.39	6.29	5.72	6.08
Pcsk2	0.14	0	0.05	0.04	1.82	1.57	1.7	1.13	0	0.03	0	0.01	0.04	0.01	0.01	0	0.76	0.62	0.84	0.69	0.05	0.07	0.07	0.06	0.05	0	0.04	0.03
Bfsp1	0.78	0.68	0.61	0.65	3.23	2.26	2.45	1.63	1.07	1.11	1.21	1.02	0.38	0.39	0.33	0.16	0.69	0.5	0.23	0.6	0.87	1.06	0.67	0.54	0.45	0.53	0.31	0.57
Mgme1	6.9	3.52	5.35	9.13	28.77	28.91	29.63	19.62	3.15	4.07	4.26	3.81	1.77	1.19	1.89	1.56	1.98	1.64	2.13	1.6	12.51	13.1	9.4	12.25	2.59	2.51	2.6	2.75
Scp2d1	0.08	0.1	0.08	0.51	0.59	0.66	0.87	0.36	0.09	0.09	2.61	0	1.38	0.45	0.48	0.25	183.36	188.97	205.78	158.76	0.31	0.23	0.9	0.81	0.41	0	0	0.1
Cst8	105.21	42.69	246.46	108.84	0.96	0.54	0.62	0.62	0.51	0.08	1.27	0.24	1870.19	1997.94	1964.77	1667.4	162.33	170.29	158.69	161.54	1.25	0.87	0.72	1.18	0.08	0.33	0	0.09
Cst12	49.77	14.69	45.51	39.25	0.1	0	0.09	0	0	0	0.6	0	856.82	916.29	560.92	541.1	40.24	38.65	41.35	47.09	0	0	0.33	0.09	0	0	0.1	0
9230104L09Rik	435.73	230.8	1184.96	543.91	1.85	0	0.34	0	0.1	0.1	0	0.2	6752.17	8492.28	6693.81	7432.08	16.59	20.61	16.89	23.88	0	0	0.88	0.85	1.99	2.72	4.04	3.64
Gins1	0.76	0.49	0.8	1.06	1.42	0.98	2.09	0.81	0.88	1.4	1.24	1.38	0.9	1.21	0.95	1.16	11.39	13.99	15.83	14.58	1.03	1.08	1.51	1.65	0.81	0.86	0.8	0.83
Sdcbp2	2.55	0.98	3.61	2.75	0.37	0.36	1.03	0.36	0.44	0.47	0.55	0.74	17.85	20.3	15.36	21.15	0.86	0.92	0.74	0.97	0.46	0.54	0.91	0.52	0.72	0.57	0.71	0.64
Fam110a	12.4	4.57	10.71	11.36	5.97	5.83	5.29	3.16	9.15	10.03	9.32	9.07	8.31	9.74	8	10.17	54.94	57.11	51.52	51.68	6.38	5.12	3.88	5.02	5.96	6.52	7.2	5.79
Slc52a3	4.87	0.49	1.87	1.39	95.2	88.56	113.64	65.99	28.05	26.41	26.44	25.2	2.33	2.59	3.29	2.3	15.74	15.43	16.3	18.25	85.09	82.03	43.37	68.95	6.49	3.95	3.91	4.08
Defb22	87.81	0.85	0.28	8.89	1901.27	1905.14	1525.66	1489.56	0.11	0	0	0	0	0.18	0.39	0	0.09	0.16	0	0	4.71	3.26	5.22	3.84	0	0	0	0
Tpx2	0.41	0.44	0.82	0.72	0.81	0.5	0.65	0.66	1.07	0.85	1.35	0.87	0.96	1.48	1.41	0.98	16.55	16.57	14.35	18.07	0.76	0.63	1.33	0.86	0.94	0.93	1.25	0.98
Mylk2	0.66	0.31	0.61	0.37	0.02	0.02	0	0	3.98	2.93	2.77	2.82	0.14	0.37	0.41	0.58	0.04	0.02	0	0.02	0.26	0.3	0.05	0.06	0.02	0	0.04	0.08
Pdrg1	37.43	9.22	31.41	25.24	28.61	26.68	28.43	17.26	21.79	16.69	17.53	17.04	141.92	147.8	150.81	108.77	8.11	8.99	10.56	9.65	24.85	20.24	20.8	18.98	25.67	23.52	25.56	25.26
Bpifa3	0.48	0.14	0.37	0.52	0.41	0.73	0.6	0.7	0.49	0.12	1.1	0.24	0.25	0.57	0.11	0.17	63.73	62.28	61.73	61.09	1.28	0.79	1.15	1.52	0.23	0	0	0.2
Snta1	5.71	1.68	5.77	4.12	4.56	4.75	5.38	2.46	39.97	35.99	32.69	32.69	2.89	2.41	3.87	3.56	2.07	2.16	3.17	2.3	5.35	5.69	6.38	4.97	12.94	11.64	13.25	11.63
Necab3	1.88	0.29	1.17	1.16	0.42	0.31	0.3	0.3	3.74	3.04	4.48	3.74	0.23	0.47	0.37	0.35	11.01	10.81	13.93	10.21	0.48	0.7	0.67	0.34	0.72	0.66	0.37	1.03
Aurka	1.4	1.08	1.55	0.88	1.75	1.08	1.6	1.04	2.05	1.56	2.52	2.22	1.62	2.04	1.63	0.86	89.65	95.42	79.32	90.9	1.77	1.57	2.14	2.21	1.38	1.37	1.01	1.66
Stmn2	0.02	0.04	0.24	0.04	0.24	0.55	0.39	0.36	0.26	0.48	0.54	0.29	0.12	0.27	0.34	0.13	0.02	0.05	0.02	0.03	0.55	0.31	0.54	0.41	1.12	1.19	0.95	1.85
Fam209	1.19	0.76	0.83	1.38	1.29	1.07	1.35	0.95	1.27	1.42	4.31	2.43	1.7	1.15	1.05	0.63	167.91	205.39	236.85	147.96	1.19	1.26	2.35	1.2	1.26	0.86	2.22	0.32
Pck1	0.28	0	0.38	0.14	0.19	1.05	1.93	0.26	22.93	33.88	27.13	39.77	1.08	0.73	1.23	0.49	0.1	0.06	0.08	0.09	0.28	0.13	0	0.04	6.01	8.09	3.91	1.82
Ankrd60	1.53	0.56	0.91	1.89	2.61	2.77	1.89	1.58	0.82	0.37	3.95	0.36	1.03	1.48	0.45	0.41	120.35	133.72	151.1	126.36	5.45	4.05	3.71	4.81	0.46	0.31	0.23	0.9
Zdbf2	0.14	0.13	0.18	0.15	0.27	0.37	0.36	0.34	0.62	0.53	0.55	0.52	0.09	0.17	0.12	0.22	12.74	11.68	11.38	12.51	0.54	0.61	0.56	0.51	0.56	0.54	0.69	0.59
Edn3	5.14	3.28	6.59	6.4	27.97	27.47	23.34	20.75	0.97	1.17	1.13	1.3	3.5	4.73	4.7	5.98	0.07	0.03	0.03	0.04	17.3	14.75	15.19	13.61	1.49	1.07	1.37	1.83
Phactr3	0.61	0.17	0.27	0.33	0.03	0.01	0.05	0.05	0.07	0.07	0.11	0.07	0.03	0.05	0.03	0.03	2.27	2.53	2.31	2.68	0.07	0.12	0.07	0.03	0	0	0.05	0.02
Fabp12	0	0	0.02	0	0.08	0.02	0.24	0.11	0.19	0.16	0.15	0.36	0.08	0.09	0.05	0.05	10.12	11.13	10.62	8.35	0.21	0.14	0.17	0.04	0	0.03	0	0.09
Nfatc2	0.79	0.26	0.48	0.5	0.69	0.77	1.09	0.65	7.97	8.23	8.24	7.93	0.92	0.81	0.97	0.63	0.61	0.42	0.58	0.63	1.2	1.16	2.49	0.86	2.13	2.03	1.79	1.85
Lrrcc1	2.55	2.53	4.46	4.63	4.01	5.7	6.88	7.81	2.93	2.81	3.52	3.96	3.1	4.24	3.38	3.49	40.24	37.58	36.86	40.18	4.55	4.72	5.63	5.03	4.97	5.87	4.91	5.02
Car1	0.05	0	0	0	0	0	0	0	0.34	0.22	0.21	0.22	0	0	0	0	0.05	0	0.23	0.05	0	0	0	0.09	0	0	0	0
Car3	1.48	1.59	12.06	1.53	16.73	52.33	93.68	23.98	275.91	360.62	249.53	387.35	4.29	0.58	5.67	2.41	0	0.15	0	0	30.74	11.69	1.73	1.53	60.21	98.28	40.28	18.96
Dok5	4.2	1.6	3.02	5.04	0.11	0.07	0.06	0.09	3.56	3.44	2.71	2.1	0.04	0.13	0.24	0.39	0.03	0.09	0	0.03	0.03	0.03	0.09	0	0	0	0	0.04
Ntsr1	2.29	0.47	0.44	1.42	0.02	0	0	0	0	0	0.02	0	35.92	32.87	9.72	17.38	0.31	0.18	0.26	0.3	0.03	0	0.03	0.07	0.45	0.39	0.32	0.38
Mrgbp	3.79	2.18	3.94	2.99	3.2	2.54	2.94	2.07	5.3	6.04	6.28	5.13	2.73	3.03	3.41	3.43	21.08	21.92	22.11	21.68	3.81	2.88	3.73	3.38	3.45	2.03	2.4	2.22
Col9a3	0.27	0.1	0.19	0.17	0.19	0.21	0.47	0.18	0.7	0.91	1.18	0.88	0.07	0.24	0.24	0.06	4.94	4.52	5.83	5.18	0.39	0.35	0.71	0.37	0.64	0.92	0.57	0.42
Oprl1	0.1	0.02	0.13	0.1	0.1	0.04	0.02	0.05	0.09	0.15	0.23	0	0.02	0.17	0.04	0.16	4.7	4.69	5.2	5.18	0.1	0.09	0.05	0.11	0.04	0.02	0.04	0.02
Mtfr1	13.45	5.09	14.35	12.51	10.34	10.95	13.27	9.99	19.22	15.78	21.92	18.59	18.79	21.42	19.82	18.18	86.51	88.27	89.05	89.07	11.31	10.51	9.58	11.17	12.23	13.3	12.31	12.18
Ggt7	5.02	1.49	6.51	3.66	1.62	1.62	1.02	0.76	2.69	2.73	3.06	2.47	43.65	42.28	48.47	39.28	11.86	10.95	11.37	12.51	2.99	3.07	2.14	2.94	3.07	2.91	3.01	1.67
Dnajc5b	0.17	0.44	0.17	0.31	0.37	0.78	0.64	0.37	0.33	0.32	2.47	0.13	0.41	1.27	0.12	0.31	123.09	120.85	117.59	112.24	0.74	0.74	0.82	0.81	0.06	0	0.12	0.15
Dsn1	0.86	0.26	0.57	0.71	1.15	0.9	1.11	0.94	2.65	1.66	1.97	2.2	1.17	1.13	1.67	0.82	15.98	15.53	15.95	17.27	1.44	1.49	1.46	1.4	1.41	1.19	1.25	1.14
Ghrh	0	0	0	0	0.37	0	0.11	0	0	0.13	0	0	0	0	0	0	0.63	1.19	0.74	0.69	0	0	0.1	0	0	0	0	0
Fam83d	1.02	0.07	0.28	0.56	11.86	7.51	8.68	5.87	0.37	0.42	0.48	0.2	0.13	0.19	0.17	0.25	2.67	2.92	2.14	3.02	2.65	2.64	1.86	2.14	4.13	1.9	1.57	1.24
Skil	19.79	9.89	24.5	20.52	2.27	2.04	2.04	1.63	17.74	16.01	18.49	16.46	51.63	57.1	50.71	45.6	3.78	3.22	3.62	4.36	4.37	4.25	5.84	4.04	8.52	7.62	7.66	6.95
Ocstamp	0	0	0.02	0	0	0	0.02	0.02	0	0.02	0	0	0.02	0	0.02	0.02	0.04	0	0.09	0.03	0	0.02	0	0.02	0	0	0.02	0.06
Pex5l	0.27	0.05	0.18	0.26	0.15	0.42	0.17	0.16	0.83	0.82	0.84	0.56	0.3	0.38	0.35	0.18	20.17	23.08	23.95	21.2	0.17	0.26	0.16	0.2	0.73	0.81	0.53	0.68
Ccdc39	0.69	0.63	1.05	1.14	0.45	0.64	0.83	0.84	25.77	24.44	29.8	31.49	2.95	3.79	3.59	1.89	84.72	74.05	71.13	86.3	1.03	0.84	0.79	1.04	0.98	1.13	0.81	0.69
Fxr1	17.23	14.53	26.05	26.46	19.99	24.61	24.62	25.01	25.02	24.31	27.95	27.8	24.26	26.11	22.62	25.13	203.08	202.8	176.46	205.4	23.32	22.6	24.07	27.23	19.87	19.12	18.45	20.18
Ect2	0.62	0.39	0.51	0.75	0.58	0.52	0.76	0.58	1.49	1.08	1.39	1.32	0.94	1.08	1.18	0.62	17.81	16.1	16.41	18.66	0.82	0.82	0.93	0.92	1.26	0.85	1.09	0.88
Lrriq4	0.6	0.67	0.9	0.67	0.51	0.58	0.35	0.39	0.06	0.06	1.37	0.11	0.15	0.19	0.05	0.24	23.54	29.44	35.11	23.95	0.12	0.27	0.09	0.38	0	0.03	0.03	0.09
Dcun1d1	4.41	2.56	6.13	6.27	5.46	6.27	7.44	6.85	5.68	5.72	6.73	6.3	6.57	6.92	6.89	5.9	48.94	49.84	49.1	43.83	8.75	8.46	8.25	10.18	10.45	9.86	10.45	10.36
Slc7a11	17.13	8.2	19.46	25.38	7.38	7.89	9.72	8.03	0.42	0.19	0.2	0.42	10.07	9.84	15.81	7.9	1.17	1.25	1.3	1.49	5.99	5.87	6.63	6.47	2.21	1.74	1.19	1.74
Cog6	11.36	5.42	13.72	12.44	9.05	7.93	9.22	7.88	9.69	9.06	12.28	10.44	13.61	17.94	15.08	15.4	75.67	76.51	74.87	83.79	10.8	10.62	12.2	10.21	13.54	12.26	13.65	13.17
Stoml3	0.1	0	0.03	0	0	0	0.03	0.03	8.8	8.43	9.49	8.16	0.71	0.35	0.55	0.18	0	0	0.06	0.1	0	0.03	0	0	0	0.19	0.03	0.04
Supt20	23.06	11.48	25.81	30.72	16.29	17.9	22.72	18.54	28.09	27.18	31.96	28.66	27.74	28.26	26.38	26.01	159.32	156.01	155.19	160.04	18.29	16.71	18.5	18.84	20.9	22	19.68	20.01
Aadac	0.09	0.06	0	0	0	0	0	0	32.89	23.82	34.98	37.38	1.69	1.25	2.44	1.24	0.08	0.15	0.21	0	0	0	0	0	0	0.05	0	0
Sucnr1	0	0	0.11	0.04	0.08	0.28	0.35	0.11	0.65	1.09	0.86	0.87	0.04	0.11	0.08	0	0.03	0	0.03	0	0	0	0	0.04	0.24	0.38	0.24	0.1
P2ry1	1.1	0.57	1.11	0.61	6.12	5.99	7.11	5.32	1.13	1.4	1.61	0.96	2.09	1.84	2.75	1.79	0.04	0.03	0.04	0.02	8.67	8.61	6.07	9.14	3.13	2.47	3.21	2.69
Ift80	2.39	1.39	2.87	3.04	1.41	1.58	1.72	1.33	9.74	8.49	10.42	10.27	2.43	3.06	2.97	2.41	19.52	18.86	20.92	23.26	2.24	2.04	2.58	2.26	3.54	3.85	3.72	3.83
Ppm1l	1.59	0.61	1.23	1.57	2.41	2.87	2.48	1.86	1.26	1.36	1.22	1.36	0.73	0.74	1.08	0.77	2.01	1.75	2.02	2.03	6.55	7.03	5.07	5.68	11.97	12.3	12.55	12.66
Ccna1	0.41	0.13	0.37	0.45	0.26	0.84	0.61	0.58	1.23	0.85	3.13	1.06	0.57	0.73	0.32	0.4	85.38	90.22	76.69	88.07	1.03	1.06	0.62	0.88	0.18	0	0.14	0.09
Smad9	0.65	0.27	0.64	0.71	0.38	0.59	0.64	0.4	0.28	0.21	0.24	0.34	0.03	0.12	0.09	0.07	0.46	0.43	0.43	0.53	3.19	3.61	2.19	3.42	7.12	7.73	8.82	7.09
Dclk1	1.06	0.11	0.63	0.57	7.3	9.74	11.55	7.78	1.5	1.5	1.74	1.46	0.46	0.53	0.79	0.48	0.85	0.93	0.98	0.82	1.72	1.49	4.55	1.44	3.78	3.35	3.93	2.94
Tm4sf1	0.65	0.18	1.31	0.72	1.24	1.09	1.61	1.29	32.54	28.47	34.34	29.99	3.88	3.44	5.34	2.98	0.32	0.55	0.53	0.56	1.39	1.6	3.43	0.95	4.41	3.76	2.83	3.96
Tm4sf4	4.88	1.48	3.14	3.69	0.9	1.13	0.93	0.41	20.66	19.76	22.84	17.32	1.12	1.11	1.71	1.65	1.09	1.2	1.46	1.7	3.56	4.27	2.23	2.92	0.42	0.27	0.33	0.1
4930579G24Rik	0.51	0.04	0.74	0.55	0.36	0.29	0.48	0.25	1.28	1.41	1.27	1.06	0.43	0.75	0.87	0.22	16.95	17.63	19.79	17.44	0.6	0.71	0.75	0.65	0.67	0.74	1.2	0.95
Mme	4.81	1.46	5.57	3.85	43.44	47.63	47.13	50.3	9.75	6.99	11.79	9.8	8.18	9.36	8.97	9.12	2.42	2.4	2.71	2.57	25.26	24.17	19.28	27.05	4.61	5.87	4.32	4.23
Veph1	3.63	1.54	3.19	4.95	11.48	11.34	11.05	9.32	6.45	5.66	5.36	6.46	0.54	0.76	0.69	0.54	0.12	0.07	0.14	0.12	3.97	2.73	2.15	3.97	10.45	11.61	10.36	12.75
Serpini1	0.22	0.26	0.44	0.33	0.09	0.12	0.12	0.19	0.1	0.11	0.16	0.22	0.46	0.84	0.75	0.57	2.11	2.08	2.1	2.02	0.12	0.16	0.62	0.15	0.37	0.41	0.2	0.39
Syt6	0.03	0.05	0.16	0.07	0	0	0.03	0.01	0.65	0.42	0.43	0.62	0.02	0.03	0.03	0.07	0.04	0.01	0.01	0.01	0.01	0	0	0.01	0.03	0	0.01	0.02
Tspan2	1.79	1.11	3.26	3.31	1.19	1.25	1.11	1.06	3.1	2.23	2.97	2.89	1.34	1.57	2.07	2.11	0.47	0.43	0.55	0.67	6.38	6.17	6.04	6.36	28.44	26.55	29.23	26.63
Ngf	1.35	0.45	1.86	1.35	6.77	4.63	7.32	5.35	1.15	1.78	1.51	1.1	1.59	0.87	1.95	1.33	0.05	0.04	0.05	0	2.99	4.88	3.83	3.92	15.82	18.54	19.5	14.68
Spag17	0.86	0.82	1.23	1.23	0.43	0.81	0.85	0.78	4.4	3.39	5.68	4.44	0.77	1.1	0.66	0.8	70.81	64.24	63.32	70.21	0.77	0.84	0.49	0.85	0.26	0.2	0.31	0.3
Gstm4	18.5	6.08	14.52	14.13	48.25	38.16	40.9	25.72	6.81	7.44	6.15	8.28	6.89	5.99	7.47	7.26	3.1	3.33	4.88	4.54	15	11.63	9.67	12.37	26.01	24.26	23.96	28.24
Slc6a17	10.16	3.04	4.91	8.43	0.55	0.69	0.44	0.27	20.37	19.26	19.02	18.11	0.84	0.94	1.25	0.73	0.5	0.36	0.43	0.51	1.41	1.74	1.17	1.52	4.81	4.22	4.73	3.22
Kcnc4	27.2	7.26	11.74	19.19	55.46	52.42	54.34	30.53	0.75	0.78	0.35	0.37	0.48	0.3	0.08	0.28	0.06	0.06	0.03	0	39.45	35.92	18.45	35.23	5.86	6.08	5.4	5.43
Slc16a4	0.91	0.69	1.63	1.37	0.18	0.39	0.46	0.28	1.38	1.15	0.94	1.57	7.66	8.74	7.5	6.67	0.91	0.87	1.12	1.12	0.49	0.6	0.44	0.69	0.79	0.9	1.18	1.13
Ddx20	6.62	3.33	8.47	6.54	3.94	4.92	6.78	4.75	11.23	9.56	14.75	11.43	6.57	8.38	7.58	6.12	114.01	126.73	139.01	115.59	5.66	5.22	6.37	5.84	6.03	6.04	6.73	7.5
Tchhl1	0.95	1.11	1.26	2.3	0	0	0	0	0	0	0	0	0	0	0	0	0	0.05	0	0	0.09	0.28	0.03	0.24	0	0	0	0
Lelp1	3.95	1.34	2.64	4.42	7.65	5.9	5.69	5.41	0.96	1.16	4.63	1.14	1.14	1.4	0.71	1.11	185.46	190.95	167.05	160.73	19.66	12.99	8.82	14.19	1.54	0.16	0.14	3.33
Creb3l4	0.54	0.64	0.64	0.91	0.79	0.92	1.64	1.21	1.67	0.98	4.41	0.8	0.72	0.92	0.67	0.85	163.93	184.4	199.41	155.24	0.88	1.21	1.23	1.23	0.24	0.64	0.48	0.73
Nup210l	0.21	0.15	0.3	0.44	0.36	0.51	0.59	0.33	0.51	0.66	1.29	0.58	0.27	0.37	0.22	0.29	38	35.92	37.16	42.5	0.64	0.59	0.44	0.57	0.64	0.79	0.33	0.39
Slc50a1	50	20.1	43.7	38.34	31.23	26.21	30.55	19.41	20.38	19.9	18.54	19.65	91.39	90.17	101.99	92.88	0.86	1.81	1.55	0.98	26.72	28.32	22.55	24.02	18.05	14.82	14.4	20.8
Tmem144	4.59	2.16	5.69	5.18	2.8	2.35	3.55	2.59	3.4	3.63	3.73	2.49	2.97	3.55	3.47	3.51	31.29	30.06	33.39	28.42	1.8	1.23	2.28	1.45	2.99	2.62	2.44	2.23
Sass6	0.64	0.49	1.31	1.02	0.44	0.88	1.26	0.88	1.35	1.57	2.2	1.71	0.84	0.88	1.11	0.86	19.57	20.62	21.54	20.81	1.06	1.11	1.55	0.96	1.07	1.84	1.6	1.7
Lrrc39	0	0.05	0.17	0.15	0.02	0.02	0.05	0.02	0.33	0.62	0.29	0.38	0.07	0.02	0	0.02	0.02	0.02	0	0	0.04	0	0.55	0	0.2	0.13	0.12	0.07
Olfm3	0	0	0	0	0	0	0	0	0.29	0.31	0.58	0.55	0.03	0.02	0.01	0.05	0.01	0.02	0.05	0	0	0	0.01	0	0	0.01	0.01	0
Larp7	3.75	3.52	5.14	5.05	6.46	7.1	8.59	5.78	6.12	6.17	7.06	4.91	5.61	8.51	6.79	6.44	94.18	107.94	88.01	107.39	5.91	4.56	4.66	5.68	3.08	3.65	2.69	3.72
Ndst4	0.02	0	0.03	0.08	0.03	0.05	0.01	0.07	0.07	0.02	0.17	0.01	0.05	0.02	0.06	0.04	6.29	5.78	5.4	5.29	0.04	0.05	0.04	0.04	0.04	0.01	0.01	0.02
Ndst3	0.09	0.08	0.26	0.14	0.08	0.08	0.15	0.15	0.99	0.51	1	0.99	0.15	0.19	0.2	0.18	4.47	4.73	4.87	3.87	0.2	0.24	0.39	0.24	0.46	0.55	0.39	0.34
Prss12	20.67	10.93	19.7	21.52	0.4	0.38	0.57	0.32	1.08	1.04	0.91	0.98	2.82	5.42	4.46	7.58	0.17	0.3	0.48	0.11	0.45	0.38	0.61	0.47	1.16	0.77	0.67	0.58
Lef1	9.97	4.03	11.61	8.67	3.45	4.1	4.92	3.72	11.82	13.04	13.91	12.52	114.86	87.24	105.83	75.79	20.33	17.6	15.76	19.16	6.53	6.26	5.97	6.53	2.9	3.05	2.55	2.16
Mcub	0.27	0.17	0.18	0.44	0.98	0.99	1.34	1.13	1.3	0.95	1.21	0.84	0.32	0.48	0.46	0.67	1.49	0.93	1.28	1.17	2.29	1.47	5.26	1.96	14.48	13.97	11.68	20.05
Sfrp2	1.87	0.84	1.3	1.47	0.67	1.43	2.27	0.69	3.34	3.37	1.66	2.93	1.68	1.23	1.98	1.1	0.03	0.08	0	0.06	12.43	14.04	12.25	13.65	20.91	19.48	18.22	17.58
Fga	3.58	2.18	6.1	2.31	16.53	19.41	21.68	14.73	0.53	0.31	0.49	0.25	1.6	6.03	2.38	12.12	0	0.06	0.02	0	8.16	8.56	1.21	4.53	0.02	0	0.02	0.03
Npy2r	0.53	0.25	0.21	0.29	9.59	9.65	10.09	8.39	1.1	1.55	1.5	2.26	0.04	0.08	0.05	0.04	0	0	0	0	2.79	2.58	2.44	1.82	1.42	1.29	1.33	2.1
Asic5	0	0	0	0	0.04	0.18	0.16	0.06	0	0	0.04	0.04	0	0.03	0	0	0	0.09	0.03	0	0	0	0	0	0	0	0	0
Egf	12.11	3.67	7.52	10.4	35.71	38.72	41.89	30.41	2.04	1.61	1.98	1.75	1.48	1.3	1.53	1.37	1.72	1.67	1.73	2.06	15.21	14.37	9.52	15.4	21.39	21.5	20.16	20.96
Glrb	3.47	2.22	3.09	5.15	0.47	0.23	0.2	0.2	0.61	0.5	0.25	0.39	2.49	2.77	2.18	2.46	0.07	0.12	0.07	0.04	0.37	0.19	0.21	0.5	0.87	0.75	0.84	1.02
Pitx2	0.06	0.05	0	0.05	0	0	0	0	12.55	15.63	11.95	12.78	0.3	0.4	0.24	0.13	1.04	1.23	1.24	1.46	0.02	0.06	0	0	0.02	0	0	0
Dkk2	0.14	0.02	0.17	0.21	0.35	0.57	0.42	0.21	0.48	0.41	0.76	0.46	0.38	0.74	0.41	0.2	0.01	0.1	0.03	0	0.8	0.47	0.59	0.59	1.53	1.42	1.37	2.15
Kcnq5	0.03	0.01	0.04	0.07	0.13	0.09	0.05	0.03	0.27	0.27	0.33	0.24	0.07	0.07	0.05	0.02	0.13	0.12	0.09	0.18	1.45	1.81	1.29	1.65	8.69	9.24	10.45	9.08
Ptgfr	0.06	0.03	0.07	0.05	0.19	0.1	0.17	0.15	0.06	0.05	0.03	0.03	0	0	0.04	0	0.01	0	0	0.03	0.04	0.02	0.06	0	0.16	0.32	0.24	0.32
Efna3	1.73	0.39	1.42	1.63	0.79	0.58	0.47	0.3	0.14	0.22	0.35	0.14	1.13	1.33	1.14	1.04	1.94	1.69	2.42	1.78	0.15	0.25	0.16	0.17	6.38	6.04	5.2	5.69
Arhgef2	11.13	3.06	10.1	7.64	4.91	4.7	6.38	3.57	24.73	24.23	27.74	21.34	25.85	22.88	26.86	19.73	70.07	71.13	79.1	70.87	7.03	6.34	19.56	7.21	12.59	13.79	11.99	10.18
Pear1	10.95	2.2	7.3	5	2.7	3.23	3.62	1.64	35.95	36.16	37.18	30.78	16.36	13.66	18.13	14.68	0.9	0.91	0.99	1.08	3.29	3.25	4.8	2.81	7.82	8.63	7.89	6.52
Cd1d1	4.55	1.45	3.01	4.22	0.5	0.8	1.39	0.26	11.31	13.76	11.51	13.69	0.5	0.38	1	1.01	0.14	0.26	0.2	0.21	4.28	4.18	3.7	4.84	1.84	2.5	1.56	2.12
Ecm1	114.66	48.66	104.9	108.02	24.03	28.17	30.83	16.02	38.32	38.9	27.95	40.41	18.19	19.46	21.94	19.1	5.2	4.64	6.45	6.44	34.35	32.4	45.54	35.38	47.16	40.97	42.62	41.22
Tmem56	0.66	0.35	1.01	1.2	1.36	1.44	1.21	1.36	3.35	3.26	4.77	4.59	5.78	5.08	5.51	3.14	29.9	31.82	33.14	31.32	3.65	2.96	2.27	3.38	1.39	1.07	0.98	1.68
Riiad1	1.98	1.33	0.46	1.43	0.71	0.99	1.58	0.96	24.31	25.71	25.28	23.36	2	2.9	3.78	1.51	110.25	100.49	111.93	92.24	2.16	1.95	2.52	2.49	2.29	2.44	3.05	3.69
Oaz3	15.5	9.17	19	27.11	42.34	42.15	34.37	37.65	3.82	3.84	14.21	5.02	3.41	6.44	2.46	7.74	627.64	698.51	652.53	590.44	89.54	71.09	43.13	85.78	7.27	0.95	1.35	14.22
Rorc	16.88	4.97	10.05	8.86	15.06	14.29	15.29	10.48	50.35	50.86	54.42	49.59	10.69	9.24	8.74	8.34	1.2	1.17	1.11	1.37	15.67	14.57	9.16	13.57	4.53	6.77	7.68	9.76
Tacr3	0.05	0	0.06	0.09	0.05	0.3	0.07	0.01	0.02	0	0	0	0	0.02	0	0.02	0.07	0.04	0.07	0.09	1.7	1.84	0.8	1.71	0	0.04	0.15	0.08
Lrrc7	0	0.01	0.01	0.01	0.15	0.1	0.12	0.17	0.01	0.02	0.03	0.02	0	0.01	0	0	0.55	0.36	0.27	0.45	0.02	0.01	0.01	0.01	0.04	0.12	0.12	0.14
Cth	23.97	5.21	13.59	18.66	66.06	50.68	61.83	45.46	13.64	13.92	13.53	13.13	4.05	6.14	5.41	5.47	0.54	0.68	0.54	0.33	33.91	27.07	23.46	33.03	39.99	35.24	34.91	38.93
Lrriq3	1.5	0.75	2.23	1.86	1.31	1.06	1.17	1.04	1.6	1.22	2.87	1.89	1.77	1.66	0.99	1.1	59.23	55.78	57.39	60.05	0.82	0.64	0.9	0.99	1.14	1.46	1.19	0.68
Dnase2b	0.95	0.6	1.45	1.46	2.61	2.16	3.9	2.86	0.31	0.17	0.17	0.17	3.39	5.96	5.66	1.98	0	0.08	0.12	0.02	0.31	0.22	0.37	0.4	1.01	0.6	0.83	0.62
Uox	0.59	0.28	0.85	0.8	0.45	0.14	0.28	0.16	12.84	10.75	12.48	11.54	2.99	3.01	3.81	1.5	0.14	0.09	0.06	0.09	0.11	0.24	0.27	0.08	0.23	0.29	0.05	0.05
Spata1	4.2	3.77	7.85	7.22	1.94	3.13	3.06	3.18	3.25	3	5.33	3.19	4.46	6.93	3.98	5.25	89.35	87.84	92.18	84.99	2.86	3.05	3.02	2.87	2.94	3.3	3.07	2.74
Ddah1	4.27	1.44	4.21	5.42	20.89	21.07	23.02	16.05	49.82	47.44	46.3	56.27	3.46	3.34	3.65	1.86	5.57	5.78	5.27	5.91	14.01	11.48	11.38	12.09	0.87	0.6	0.53	0.66
Cyr61	3.2	1.85	3.79	3.78	12.39	12.46	10.09	9.05	34.91	44.86	27.66	34.19	4.78	6.68	9.88	4.45	1.08	1.34	1.54	1.14	15.02	12.76	9.19	14.82	4.6	4.2	2.92	2.75
Col24a1	0.03	0.04	0.01	0.04	3.87	2.8	3.58	3.86	0	0.03	0	0.05	0.07	0.03	0.06	0.05	0.19	0.24	0.25	0.2	0.12	0.14	0.87	0.04	0.19	0.15	0.27	0.12
Cryz	6.71	2.06	5.66	4.52	2.31	2.39	3.04	2.11	20.47	18.75	19.1	17.44	2.19	3.21	2.91	3.8	2.42	2.36	2.21	2.6	2.26	2.73	2.71	2.59	3.05	2.9	2.62	3.02
Ccne2	0.06	0.41	0.71	0.85	0.38	0.58	0.7	0.66	0.36	0.42	0.53	0.41	1.02	0.59	0.47	0.59	13.49	14.16	15.49	13.86	0.57	0.47	0.58	0.6	0.38	0.36	0.5	0.65
Cdh17	4.01	1.92	5.3	6.45	0.06	0.13	0.54	0.05	0.24	0.13	0.06	0.3	0.65	0.53	0.71	0.64	0.2	0.21	0.17	0.2	0.26	0.42	0.44	0.15	14.98	16.57	16.24	20.97
Mmp16	0.19	0.18	0.44	0.24	0.32	0.36	0.33	0.19	0.26	0.28	0.32	0.27	0.08	0.22	0.13	0.18	0.07	0.12	0.07	0.07	0.52	0.57	0.62	0.57	2.44	2.8	2.58	2.89
Faxc	0.98	0.51	0.6	0.88	0.36	0.29	0.36	0.36	0.69	0.53	0.59	0.66	0.39	0.32	0.4	0.34	0.73	1.01	0.96	0.85	2.08	2.3	2.01	2.26	12.18	13.18	12.77	12.07
Fhl5	0.96	0.26	1.29	1.21	1.48	1.01	1.32	1.18	1.34	0.9	2.35	1.17	2.39	3.51	2.08	2.05	150.64	157.64	152.99	146.76	0.91	1.3	2.21	1.39	0.97	1.08	0.64	0.77
Clca3a2	5.85	2.59	5.64	6.09	18.62	14.61	25.11	17.71	0.22	0.18	0.26	0.16	10.32	9.95	8.74	8.89	0.1	0.11	0.12	0.05	153.16	171.04	33.17	102.81	17.85	15.42	17.66	36.33
Spaca1	0.15	0.06	0.1	0.16	0.21	0.37	0.37	0.6	0.74	0.88	3.47	0.87	0.53	0.57	0.1	0.16	84.1	101.75	115.78	81.89	0.35	0.69	0.13	0.66	0.26	0.22	0.05	0.19
1700009N14Rik	3.44	0.67	2.86	3.57	10.27	7.94	8.27	6.1	1.68	0.79	9.46	1.71	1.17	1.82	1.31	1.26	334	318.84	355.64	317.3	23.31	19.04	15.3	25.16	3.04	0.64	0.39	5.73
Epha7	0.17	0.23	0.25	0.43	0.18	0.16	0.17	0.11	0.36	0.45	0.75	0.47	0.05	0.09	0.05	0.07	2.44	2.55	2.09	2.35	0.15	0.13	0.24	0.08	0.21	0.11	0.29	0.16
Cfap206	0.87	0.88	0.85	1.23	0.8	1.81	1.9	1.8	27.3	25.88	33.87	26.88	2.49	3.99	2.8	2.67	315.15	340.63	360.47	323.12	1.66	1.64	1.32	2.52	0	0.12	0.08	0.37
Aldob	0.12	0.19	0.12	0.03	0	0	0	0.05	51.68	52.41	61.72	63.18	2.01	2.04	3.48	1.13	0.05	0.13	0.03	0.06	0	0	0	0	0	0	0.06	0
Ppp3r2	0.22	0.23	0.13	0.49	0.4	0.5	0.51	0.35	0.47	0.09	1.65	0.22	0.79	0.96	0.22	0.29	120.63	118.72	116.39	125.46	0.78	0.99	0.8	0.76	0.02	0.04	0	0
Ncbp1	23.35	11.96	25.94	26.51	12.82	14.17	15.78	11.12	20.12	18.74	21.19	20.1	19.94	23.25	19.34	20.31	104.16	107.07	106.25	107.57	15.05	14.94	13.99	15.24	19.3	19.7	20.1	18.86
Hemgn	0.05	0.03	0.15	0	0.08	0.05	0.21	0.07	0	0.06	0.08	0.11	0.06	0.19	0.13	0.08	38.08	34.31	29.17	34.65	0.15	0.05	0.18	0.07	0	0	0	0.16
Nans	45.02	19.72	50.95	42.1	22.33	18.14	20.89	12.39	10.69	8.46	9.02	8.18	108.77	117.09	127.17	104.65	2.83	2.68	2.78	3.11	27.55	26.24	18.92	24.84	12.81	10.4	11.68	10.62
Tmeff1	1.4	0.74	1.53	0.86	0.29	0.3	0.58	0.31	1.28	0.91	1.3	1.88	0.51	0.74	0.97	1.7	18.27	18.48	21.68	20.06	0.62	0.36	0.71	0.32	0.82	0.98	0.5	0.43
Cavin4	0.35	0.15	0.31	0.12	0.09	0.03	0.08	0.05	0.23	0.03	0.22	0.16	0.1	0.08	0	0.25	3.08	3.52	3.42	4.4	0.09	0	0.05	0.11	0	0.06	0.06	0
Brinp1	0.05	0	0	0	0	0	0	0	0.14	0.13	0.06	0.19	0.04	0.03	0.05	0.02	0.37	0.36	0.36	0.34	0	0	0.09	0	0.05	0	0.07	0.02
Kif12	0.68	0.05	0.23	0.25	1.07	1.3	1.02	0.48	11.75	13.26	12.5	17.35	0.44	0.52	0.26	0.29	0.02	0	0	0.02	0.02	0.04	0.02	0.07	0.02	0.02	0	0
Tnc	0.48	0.12	0.56	0.55	0.68	1.18	0.95	0.25	0.78	0.78	0.83	0.97	0.9	0.56	0.88	0.59	0.3	0.52	0.64	0.46	7.8	7.55	7.04	5.23	1.57	1.07	0.86	1.36
Pappa	0.71	0.31	0.58	0.61	0.57	0.46	0.44	0.47	0.96	0.89	1.02	1.28	0.95	0.94	1.04	0.87	1.96	1.71	2.11	2.04	0.37	0.38	0.45	0.4	6.84	7.04	9.5	9.46
Astn2	0.1	0.06	0.08	0.1	5.52	6.65	6.33	4.83	5.21	4.24	4.42	4.39	0.3	0.18	0.53	0.17	0.18	0.15	0.13	0.19	1.85	1.72	1.22	1.3	3.28	3.42	4.02	4.12
Ptgr1	1.19	0.47	0.86	0.59	1.18	1.01	1.57	1.2	2.95	2.68	2.87	3.03	0.67	0.85	0.8	1.18	5.13	4.97	4.36	6.1	5.77	5.31	8.84	5.49	56.69	50.14	54.27	62.72
Slc46a2	9.2	2.75	6.64	8.29	46.27	35.03	48.51	30.78	0.27	0.42	0.36	0.25	1.11	1.19	1.38	2.59	0	0	0	0.02	25.25	24.64	18.33	24.78	0.38	0.71	0.79	0.21
Zfp37	2.58	1.94	3.19	3.6	1.8	3.09	3.5	2.58	2.72	3.94	4.08	3.86	2.24	2.98	2.45	2.75	52.08	54.22	56.12	48.2	2.84	3.5	2.45	3.06	3.11	3.25	3.05	3.8
Wdr31	2.61	1.32	1.84	1.69	1.84	1.47	2.06	1.17	14	15.74	15.46	13.85	0.99	1.59	1.32	1.51	35.32	37.15	40.67	37.18	1.44	1.49	1.45	1.25	2.71	2.22	1.66	1.86
Tal2	0.12	0	0.04	0.09	0.06	0.04	0.02	0.06	0.07	0.02	0.15	0.02	0.07	0.13	0.12	0.02	0.88	0.67	0.82	0.86	0	0.1	0	0	0.17	0.09	0.17	0.25
Aqp7	0.23	0.09	0.21	0.18	0.89	1.19	1.82	0.46	4.11	5.91	4.68	6.73	0.17	0.54	0.22	0.3	57.95	61.09	59.86	53.99	0.49	0.53	0.31	0.49	0.75	0.98	0.47	0.18
Aqp3	0.07	0	0.13	0	0.07	0.04	0.06	0	0.08	0.07	0.11	0.04	0	0	0	0	0.65	0.23	0.34	0.94	0.07	0.03	0.21	0	0.14	0.08	0.28	0.09
Kif24	1.48	0.6	1.18	1.2	1.46	1.36	1.87	1.18	6.28	5.76	6.3	6.46	1.06	0.95	1.23	0.86	16.78	15.91	17.17	18.06	2.21	1.97	1.4	1.62	1.56	1.16	1.41	1.29
1110017D15Rik	1.92	1.1	1.56	2.07	1.33	2.69	2.29	1.34	23.32	32.05	23.77	25.84	3.27	3.13	2.03	2.55	239.45	230.53	195.92	211.58	2.39	3.26	1.9	3.62	0.39	0.12	0.17	0.54
Cntfr	2.38	0.8	1.8	0.87	0.84	0.85	0.97	0.39	2.74	2.82	3.08	2.35	5.12	4.21	5.29	3.26	1.56	1.16	1.04	1.04	1.63	2.41	1.67	1.8	11.11	12.84	13.87	12.57
Enho	2.48	0.3	3.66	2.17	4.21	2.56	3.32	2.05	3.29	3.02	2.42	3.85	3.47	2.57	3.56	3.59	1.07	1.98	1.2	1.54	3.4	3.69	4.42	3.05	17.42	15.35	21.17	14.5
Fancg	2.85	0.95	2.56	2.48	1.3	1.91	2.46	1.3	3.31	3.11	3.72	3.15	3.2	2.94	2.48	2.36	25.57	25.2	23.97	27.39	3.5	2.54	3.29	2.39	5.15	4.51	5.34	4.19
Atp8b5	1.24	0.34	0.96	0.87	0.55	1.17	0.89	0.48	10.68	10.69	11.32	12.12	0.86	1.02	0.74	0.46	20.38	19.16	17.65	23.14	5.2	5.81	3.66	6.08	1.01	0.75	0.82	0.85
Tesk1	21.81	6.17	12.71	14.24	18.86	17.7	18.12	9.49	18.1	17.5	23.23	16.53	10.42	11.26	10.31	9.99	165.95	178.28	167.47	197.65	20.28	19.32	15.46	18.37	14.24	11.83	13.55	13.54
Car9	0.09	0.04	0.34	0.1	0.1	0	0.05	0.08	0.84	0.62	0.76	0.77	0.07	0.25	0.03	0.13	0.03	0.05	0	0.03	0.06	0.09	0.52	0.11	0.22	0.07	0.25	0.19
Tpm2	18.29	23.22	29.65	22.21	14.93	16.65	11.74	7.87	13.99	16.57	13.85	13.2	14.73	14.97	18.38	20.32	1.53	2.4	2.33	2.26	112.19	140.49	97.5	113.3	355.09	334.69	348.89	308.84
Gba2	6.13	2	4.5	4.42	4.61	3.89	5.31	2.95	7.1	7.97	7.98	6.83	5.92	6.18	6.01	5.21	29.61	29.61	29.38	31.03	5.05	4.61	4.92	4.41	6.2	5.34	5.9	5.87
Gne	21.53	9.31	20.95	19.3	20.04	18.49	20.93	13.95	5.16	5.35	5.05	5.14	48.13	41.88	47.59	39.85	0.97	0.88	0.95	0.86	12.54	11.36	8.13	10.43	9.87	10.25	10.81	11.03
Plin2	3.8	1.54	3.32	2.31	3.51	3.94	5.51	2.95	14.92	15.13	11.25	16.24	2.41	2.54	2.65	3.78	16.65	22.49	26.25	19.26	4.01	4.87	180.98	4.04	7.72	7.56	6.05	5.89
4921539E11Rik	0.15	0.22	0.19	0.5	0.66	0.79	0.66	0.61	0.14	0.03	0.6	0.11	0.83	0.84	0.65	0.85	50.68	46.95	50.47	46.22	1.14	1.12	0.8	1.62	0.05	0.08	0	0.18
Sgip1	0.08	0.05	0.05	0.1	0.14	0.03	0.11	0.06	10.87	10.84	11.82	10.63	0.67	0.82	0.8	0.38	4.54	3.41	3.69	4.36	0.11	0.14	0.29	0.23	0.54	0.55	0.41	0.52
Dnajc6	0.54	0.06	0.25	0.23	5.11	5.23	5.26	4.05	19.11	17.9	19.05	17.97	0.79	0.53	0.95	0.51	0.52	0.64	0.53	0.53	0.59	0.58	0.36	0.52	0.68	1.08	0.83	0.78
Slc5a9	0.28	0.15	0.43	0.24	0.07	0.21	0.19	0.05	3.93	3.66	5.15	4.44	0.39	0.36	0.46	0.24	0.28	0.33	0.43	0.26	12.83	12.36	4.66	9.17	1.08	0.64	0.79	1.78
Itgb3bp	1.52	1.42	2.71	3.01	1.14	1.14	1.5	1.65	1.76	2.13	2.34	3.02	1.92	1.54	1.39	1.46	17.61	17.95	17.86	15.59	2.02	2.09	1.81	1.9	2.39	2.52	2.46	2.24
Cdkn2c	3.39	1.27	2.77	3.01	2.65	3.03	3.52	1.74	6.83	7.01	6.29	5.98	2.24	2.4	3.11	2.43	38.38	40.19	38.15	45.74	4.83	3.86	4.67	4.38	3.68	3.81	3.99	3.56
Angptl3	0.12	0.06	0.19	0.13	0	0	0.07	0	0.37	0.61	0.16	0.46	0.03	0.19	0.05	0.11	0	0.02	0	0	0.02	0	0.04	0.07	0.1	0	0	0
Usp1	5.33	5.14	8.66	9.6	7.35	9.55	10.11	9.31	7.21	6.89	9.37	9.48	8.51	11.26	8.92	10	150.76	144.02	150.48	151.79	9.77	8.02	10.32	11.35	5.48	5.3	4.6	5.52
Cyp2j13	3.05	0.49	1.43	1.25	45.99	55.72	47.09	46.81	8.3	8.07	9.52	9.68	0.42	1.11	0.61	1.94	0	0	0	0	18.6	16.76	11.8	18.58	0.59	0.79	0.41	0.5
Hook1	11.71	7.99	17.23	17.61	10.78	13.12	14.61	14.18	9.76	8.19	10.93	10.27	13.02	16.55	13.93	13.45	84.35	82.52	71.12	91.44	14.9	17.28	11.01	17.26	11.32	10.71	9.68	11.42
Fggy	11.36	4.87	7.57	7.84	15.09	14.62	15.99	14.08	50.38	47.76	55.21	57.37	5.64	6.3	6.73	4.45	1.53	1.33	2.47	1.54	11.93	10.53	7.7	10.9	6.7	6.52	5.29	4.35
Eqtn	0.61	0.26	0.25	0.5	0.22	0.27	0.48	0.43	0.76	0.34	1.26	0.5	0.9	0.59	0.79	0.22	73.64	79.16	100.63	67.6	0.51	0.4	1.04	0.39	1.13	1.2	1.65	1.68
Ift74	5.27	5.1	8.19	10.62	5.89	8.29	8.33	10.12	14.83	13.04	15.94	16.86	7.82	10.39	7.28	8.25	81.47	81.87	77.98	77.86	6.69	7.39	7.39	7.99	6.75	7.42	6.47	8.04
Pdpn	13.62	8.69	20.8	17.76	17.16	19.8	20.69	15.81	20.39	18.74	18.06	16.81	60.76	56.76	54.92	49.55	1.62	1.89	1.98	1.56	20.73	19.82	24.27	18.28	16.48	15.45	15.78	16.98
Orc1	0.1	0.1	0.31	0.13	0.26	0.1	0.09	0.2	0.5	0.31	0.49	0.41	0.19	0.19	0.34	0.06	4.71	4.35	5.22	4.53	0.45	0.45	0.49	0.54	0.5	0.35	0.78	0.37
Pramef12	5.04	1.98	5.05	3.6	0.18	0.18	0.07	0.09	0.81	0.65	0.96	0.64	0.54	1.51	1.04	3.75	1.2	1.1	1.35	1.01	0.19	0.21	0.49	0.3	0.13	0.11	0.18	0.24
Dmrtb1	5.9	3.53	4.49	8	0.76	2.35	1.64	1.16	1.87	1.03	7.94	1.19	1.02	1.97	0.62	1.12	237.39	235.15	245.73	224.91	2.26	2.64	2.5	3.28	0.27	0.5	0.4	1.37
Lrp8	8.04	2.68	5.82	7.09	0.35	0.37	0.35	0.21	2.8	2.42	3.55	2.78	0.75	1.32	0.83	2.05	21.1	18.57	18.73	22.28	0.9	0.99	1.01	0.77	0.99	0.96	1.66	1.54
Cyb5rl	3.99	1.16	4.14	2.44	4.5	3.08	4.16	2.56	3.89	4.1	3.94	3.69	15.74	14.02	16.64	13.31	2	1.77	1.75	2.07	3	2.32	2.1	1.96	2.05	2.02	1.88	1.95
Mrpl37	18.28	6	19.33	12.01	9.95	8.79	11.24	8.01	16.17	14.15	13.99	15.01	92.43	77.58	97.4	72.39	18.54	18.23	18.89	20.07	11.07	9.35	9.56	8.91	10.9	10.87	11.22	10.38
Kcnq4	5.09	0.62	1.95	2.01	0.94	0.72	1.46	0.85	1.13	1.57	1.6	1.58	0.37	0.34	0.51	0.68	0.36	0.39	0.43	0.38	1.78	2.35	1.89	1.79	14.15	14.67	14.01	10.48
Hivep3	2.53	1.29	2.41	1.88	2.03	2.21	2.61	1.67	2.34	2.52	2.02	2.07	11.08	9.06	9.78	7.86	0.5	0.48	0.57	0.5	1.6	1.61	1.93	1.47	1.66	1.6	1.44	1.5
Edn2	0	0	0.08	0	0	0	0	0	0.05	0.05	0	0.04	0	0	0	0	0.04	0	0.04	0.04	0.12	0.16	0.22	0.08	0.73	0.78	0.38	0.41
Ccdc30	2.38	1.77	2.9	2.86	1.76	2.14	2.34	1.83	46.73	43.46	48.1	44.63	2.72	2.88	3.75	2.65	112.28	111.89	99.54	108.59	1.85	2.84	1.49	2.54	0.98	1.25	0.83	1.35
Tmem269	0.63	0.15	0.58	0.55	0.43	0.25	0.29	0.44	0.5	0.4	0.72	0.48	0.88	0.65	0.57	0.42	29.28	30.79	25.85	30.27	0.59	0.62	0.46	0.89	0.58	0.35	0.45	0.85
Svbp	3.92	2.29	4.81	5.17	4.1	4.43	3.73	2.26	6.49	5.56	5.61	5.32	4.37	5.36	3.74	4.86	60.73	50.11	62.9	52.3	6.11	7.18	5.66	4.78	1.28	1.76	2.09	0.81
Mycl	8.78	2.46	7.21	6.41	0.94	0.55	1.38	0.33	6.31	5.4	4.92	4.71	0.76	1	1.29	1.95	0.23	0.34	0.17	0.14	0.84	0.85	1	0.85	1.33	1.24	1.36	1.52
Epha8	0	0	0.07	0.05	0.04	0.03	0.12	0.01	0.52	0.32	0.12	0.26	0.1	0.04	0.13	0.04	0.59	0.64	0.83	0.68	0.35	0.15	0.04	0.1	0.03	0	0	0.02
Kif2c	1.15	0.89	0.96	1.58	1.95	2.68	2.14	1.55	0.94	0.49	2.27	0.94	1.16	1.81	1.05	0.96	107.74	106.37	85.88	108.31	4.16	3.59	2.79	4.36	0.84	0.54	0.5	1.37
Ptch2	23.25	5.8	13.64	11.98	3.77	4.72	5.17	1.93	44.79	48.15	46.02	41.03	14.32	13.21	17.12	14.12	7.15	6.69	7.41	7.61	9.23	6.08	5.27	7.11	0.54	0.35	0.55	0.36
Ccdc163	3.62	1.2	2.36	3.16	2.49	2.29	2.76	1.96	6.19	6.25	7.89	5.6	3.08	3.34	3.88	4.31	48.69	46.95	57.21	49.96	3.38	2.27	3.4	2.13	3.42	3.24	3.22	2.86
Nasp	5.06	5.06	7.57	7.53	6.93	8.28	10.24	7.57	10.43	11.26	16.52	11.15	10.01	11.6	9.95	10.95	169.43	202.91	150.2	225.95	6.94	7.3	6.73	6.47	6.01	6.39	5.25	6.6
Tspan1	29.37	11.68	26.23	25.15	0.29	0.66	0.56	0.42	1.58	1.03	1.06	0.95	0.7	1.87	0.92	5.8	0.69	0.57	0.3	0.51	0.66	0.44	0.43	0.45	0.35	0.4	0.34	0.53
Rad54l	0.65	0.37	0.98	1.01	0.55	0.67	0.46	0.33	0.87	1.16	1.22	1.2	0.47	0.44	0.52	0.26	3.58	3.37	4.4	3.8	0.67	0.42	0.76	0.64	0.85	0.61	0.8	0.94
Nsun4	4.86	2.43	3.48	3.62	3.62	4.44	3.83	3.47	5.69	5.63	8.23	5.45	5.09	4.43	4.59	3.42	76.61	68.38	64.15	63.9	6.38	6.39	4.43	6.19	4.5	3.42	4.53	5.8
Cyp4a31	0.02	0	0	0	0	0	0	0	1.47	0.95	0.71	1.3	0	0.05	0	0	0	0	0	0	0	0	0	0.02	0.05	0.05	0	0.03
Cyp4a14	0	0	0.02	0	0	0.1	0.02	0.04	0	0	0	0	0	0	0	0	0.07	0.1	0.07	0.07	0	0.02	0	0	0	0	0	0
Stil	0.3	0.17	0.38	0.35	0.17	0.26	0.27	0.16	0.85	0.78	1.22	0.87	0.46	0.54	0.36	0.15	15.17	13.68	13.08	14.89	0.36	0.45	0.54	0.34	0.47	0.47	0.34	0.39
Mrto4	8.07	4.06	7.94	6.52	8.69	7.83	9.89	6.6	10.81	8.18	9.43	8.53	7.96	8.05	7.75	7.2	37	40.35	40.54	42.9	8.76	8.35	8.53	8.53	8.59	6.66	7.72	5.41
Pla2g2c	0.17	0.04	0.17	0.15	0.71	0.43	0.59	0.43	0.73	0.63	1.17	0.64	0.3	0.22	0.16	0.18	17.56	16.95	20.77	17.83	1.54	0.88	0.46	1.32	0.29	0.08	0	0.3
Pla2g2e	0	0.54	0.61	0	0.15	0.07	0.13	0.06	1.52	1.63	1.12	1.68	0	0.07	0	0.15	0	0.18	0	0.07	0.62	0	1.92	0.52	0.44	0.16	0.29	0.09
Cda	1.61	0.18	1.58	1.06	0.15	0.3	0.33	0.2	55.36	52.44	51.27	58.88	15.22	11.89	16.38	10.46	0	0.06	0.13	0.21	0.49	0.28	0.44	0.4	0.82	0.63	1.03	0.98
Kif17	4.62	1.35	2.79	3.03	14.45	12.95	13.87	9.34	2.83	2.51	7.37	2.72	2.65	2.75	1.63	1.85	88.8	113.58	103.53	113.66	10.03	8.82	5.67	8.39	1.76	0.97	0.68	1.24
Alpl	145.98	90.01	121.05	139.58	4.1	4.46	4.15	2.1	9.27	6.95	6.47	7.23	5.41	8.56	7.53	18.17	2.14	2.46	2.94	2.63	3.84	4.13	2.96	2.93	2.59	1.67	2.34	2.2
Zcchc17	14.83	10.17	13.24	13.67	50.35	47.08	53.49	36.64	7.48	8.54	8.29	7.55	12.78	14.33	13.01	12.88	3.79	4.54	4.42	4.58	33.53	34.43	22.1	31.09	16.07	13.72	16.49	12.48
Azin2	8.78	2.33	5.82	6.5	10.69	9.11	7.68	5.84	41.52	36.63	39.38	32.7	3.9	4.51	5.41	5.61	79.66	95.81	91.67	98.15	23.82	21.24	12.59	19.9	7.55	4.69	5.11	6.11
Rnf19b	10.67	4.46	9.19	7.32	8.68	6.83	8.11	3.82	18.44	19.3	23.5	17.08	7.76	8.6	8.51	8.09	177.76	185.7	196.14	184.92	7.17	5.67	11.8	5.82	7.07	6.77	7.25	7
A3galt2	0.39	0.16	0.38	0.45	2.81	2.28	2.6	1.86	0.58	0.45	0.55	0.42	0.25	0.1	0.29	0.15	0.05	0.08	0.05	0.07	0.4	0.22	0.28	0.35	0.28	0.53	0.42	0.4
Csmd2	0.17	0.07	0.08	0.17	0.12	0.11	0.11	0.07	0.05	0	0.02	0.01	0.02	0.03	0	0.05	0.73	0.6	0.58	0.88	0.07	0.11	0.07	0.09	0	0	0	0
Stmn1	5.43	6.04	9.75	7.44	2.67	2.12	2.19	1.15	19.28	14.41	16.42	20.03	11.81	11.1	11.11	8.29	47.72	51.17	55.94	49.86	2.06	2.21	2.79	1.74	2.96	3.84	3.28	3.68
Extl1	2.29	0.54	1.11	1.49	0.05	0.17	0.05	0.01	0.81	0.74	0.91	0.77	2.85	3.07	2.9	2.64	0.11	0.07	0.07	0.11	0.49	0.79	0.4	0.34	1.05	0.99	1.04	0.86
Sh3bgrl3	184.39	92.71	199.75	204.9	881.59	963.86	864.18	649.61	70.39	93.7	49.94	61.17	172.98	192.88	157.38	198.43	19.75	23.3	17.08	15.91	498.05	430.48	398.52	425.32	167.5	168.94	193.17	249.21
Tekt2	0.65	0.45	0.72	0.96	1.58	1.74	2.44	2.22	17.87	16.29	23.73	15.29	2.5	1.93	1.54	1.35	160.43	194.85	192.39	168.42	2.68	3.23	2.71	2.94	1.43	1.38	1.53	1.66
Rspo1	2.52	1.58	2.25	2.34	5.64	6.09	6.73	3.19	88.42	94.27	83.26	100.69	7.1	4.89	9.75	4.69	0.21	0.14	0.21	0.16	4.93	4.02	2.77	2.66	9.14	8.04	8.22	6.51
Cdca8	0.85	0.14	0.43	0.63	0.77	0.6	0.81	0.46	0.61	0.71	0.95	0.97	0.85	0.46	0.56	0.45	18	16.03	15.68	18.63	0.53	0.82	0.79	0.57	0.93	0.66	0.85	0.78
Fgr	0.41	0.18	0.26	0.32	0.55	0.56	0.71	0.25	16.12	17.28	17.25	14.87	1.08	1.97	2.36	1.52	0.37	0.4	0.63	0.51	1.21	1.06	7.16	1.17	0.73	0.91	0.35	0.45
Fam76a	10.56	3.92	8.44	8.01	10.05	9.82	10.59	7.25	14.56	13.92	17.94	15.59	7.86	8.27	10.15	7.74	52.67	53.06	58.48	52.46	10.88	10.86	11.05	10.11	15.4	16.25	17.52	15.77
Sema3a	0.1	0.03	0.06	0.14	0.22	0.44	0.52	0.42	0.73	0.77	1.18	1.37	0.06	0.08	0.09	0.05	0.08	0.05	0.15	0.12	0.42	0.32	0.73	0.44	1.62	1.92	2.12	2.06
Smpdl3b	15.39	6.05	12.15	13.05	0.61	0.37	0.39	0.33	2.25	1.65	1.44	1.56	2.69	2.68	2.28	3.34	1.93	1.3	1.49	1.65	0.56	0.73	1.11	0.67	6.64	4.82	6.62	6.55
Rcc1	8.09	1.54	4.04	4	4.56	3.25	3.95	2.37	7.05	6.85	7.43	6.61	4.12	4.3	4.28	4.32	43.14	45.25	41.77	49.23	6.3	5.74	4.14	4.58	4.7	3.76	4.75	4.04
Arhgef19	3.34	1.05	2.09	2.1	5.59	3.07	6.88	2.59	19.72	19.37	20.18	19.65	2.25	2.03	2.84	2.72	0.3	0.24	0.19	0.09	9.61	9.42	6.92	7.17	5.83	6.27	5.73	4.66
Padi2	39.45	15.02	30.87	31.15	0.53	0.24	0.63	0.28	6.9	6.86	5.33	5.06	10.08	9.87	9.11	11.23	0.9	0.92	1.23	0.83	0.46	0.32	2.08	0.26	3.76	4.28	2.5	6.09
Acot7	12.94	5.73	8.79	9.85	9.83	9.21	9.42	6.75	39.61	44.19	47.31	34.87	6.42	6.83	5.72	5.25	287.42	278.29	277.88	269.59	7.58	9.18	7.48	7.63	5.01	4.12	5.15	5.79
Galntl5	0.36	0.14	0.54	0.79	0.59	1.42	1.53	0.85	0.5	0.49	3.15	0.36	0.95	2.18	0.45	0.54	223.28	229.97	227.42	211.33	1.42	1.62	1.4	1.79	0.12	0.12	0.04	0.28
Smarcd3	64.96	21.81	43.17	51.1	210.9	186.37	199.44	125.21	16.43	12.51	13.02	10.59	11.35	13.46	10.04	16.5	0.98	0.91	1.26	1.21	115.4	113.74	67.89	105.33	13.69	11.77	13.37	10.96
Tas1r1	0.66	0.21	0.79	0.25	0.2	0.24	0.27	0.06	0.24	0.35	0.22	0.23	5.11	4.79	5.52	3.18	6.98	7.91	7.78	6.05	0.14	0.18	0.06	0.12	0.15	0.47	0.28	0.24
Abcf2	16.22	5.82	13.17	11.66	18.24	16.51	18.79	12.49	11.87	12.56	13.87	12.55	18.65	18.95	19.03	17.23	74.06	76.78	78.75	74.58	16.87	17.42	15.73	15.13	16.13	14.2	16.06	15.17
Abcb1b	0.48	0.51	0.59	0.74	1.24	1.78	2.08	2.28	1.38	1.87	1.32	2.43	0.67	0.82	0.65	0.59	0.19	0.19	0.16	0.14	2.11	2.27	2.86	2.63	6.24	5.93	4.96	5.53
Slc2a5	7.27	3.14	5.59	5.18	10.65	12.14	13.17	7.22	5.72	4.77	10.37	4.7	1.64	3.06	1.31	3	196.46	197.32	199.42	201	2.92	2.71	1.89	2.34	0.2	0.19	0.08	0.31
Masp2	0.43	0.3	0.65	0.76	0.13	0.22	0.36	0.13	0.45	0.26	0.23	0.36	0.14	0.09	0.12	0.21	0.09	0	0.02	0	0.17	0.06	0.1	0.15	0.14	0.11	0.16	0.12
Slc25a33	3.84	1.05	2.49	2.92	7.46	6.42	5.93	4.92	2.75	1.89	3.25	2.42	3.34	3.12	3.01	2.91	19	21.88	24.41	21.9	5.73	5.84	4.54	6.74	2.73	3.46	2.83	2.35
Ctnnbip1	24.97	8.42	20.69	20.54	2.21	2.99	2.55	1.26	8.72	7.86	8.11	8.74	24.57	27.14	29.33	22.01	1.31	1.63	2.12	1.77	2.34	2.48	3.86	1.68	4.18	3.44	4.55	3.23
Fam126a	1.08	0.47	1.44	1.16	1.77	1.75	2.4	1.7	6.72	6.29	7.44	7.27	1.63	1.91	1.74	1.28	26.47	26.46	26.12	31.8	3.18	2.74	5.45	2.49	4.16	5.24	5.25	4.39
Fbxo44	11.39	5.46	8.09	10.49	5.84	6.01	5.87	4.56	19.1	19.16	18.96	18.62	3.56	2.94	3.3	4.25	41.29	44.19	51.36	44.09	12.25	10.98	7.08	11.88	9.99	8.57	9.16	8.37
Mad2l2	8.01	3.68	6.01	7.44	4.15	4.35	3.93	2.77	9.13	8.31	8.17	7.76	5.7	6.48	4.65	5.97	61.28	63.97	58.5	63.2	4.74	5.91	4.38	4.09	3.64	3.78	2.55	2.4
Draxin	0.01	0.01	0.01	0	0.01	0.01	0.01	0.01	0.01	0	0.02	0.03	0	0	0	0	0.33	0.35	0.14	0.1	0.02	0.05	0.08	0.02	0.02	0	0.02	0.06
Dnajc2	3.84	3.84	5.45	5.43	2.38	3.04	3.59	3.25	4.69	3.89	4.87	4.33	6.87	8.23	6.37	6.65	39.14	43.14	34.11	38.95	3.29	2.49	3.81	3.29	3.38	3.78	3.42	3.3
Trp73	0.16	0.12	0.16	0.08	0.05	0.02	0.11	0.05	10.47	10.58	10.16	8.87	0.42	0.42	0.4	0.31	0.08	0.05	0.03	0.04	0.08	0.09	0.06	0.04	0.11	0.05	0.1	0.13
Arhgef16	10.64	2.07	5.67	5.71	35.49	28.73	35.68	21.1	28.72	26.38	26.55	25.32	13.07	11.9	13.4	11.18	0.15	0.1	0.09	0.07	4.53	2.86	2.62	3.18	7.42	6.16	6.77	7.3
Cptp	6.96	2.09	4.51	4.96	6.88	6.26	7.9	4.23	6.78	6.36	8.39	7.49	8.54	8.09	8.48	7.58	52.57	51.76	53.41	55.23	9.66	10.21	7.25	8.31	7.5	6.79	7.79	7.28
Ttll10	39.55	12.06	24.18	21.76	10.51	10.21	14.21	8.12	36.06	35.88	40.4	32.58	16.81	15.89	16.9	16.6	130.96	129.91	134.45	122.47	15.82	13.52	10.28	14.55	62.77	46.47	61.83	26.03
Kcnip4	0.15	0.45	0.61	0.35	0.19	0.57	0.49	0.53	0.11	0.11	0.19	0.08	0.06	0.19	0	0.05	5.29	4.51	4.78	5.46	0	0.07	0.04	0.12	0.03	0.08	0.1	0.03
Sorcs2	7.4	2.79	6.26	5.28	6.74	5.91	7.6	3.45	93.97	83.69	89.58	86.94	10.24	10.74	12.53	9.7	3.79	3.62	4.62	3.92	6.73	5.18	7.28	5.13	4.14	3.82	4.54	4.17
Ablim2	2.88	0.86	3.18	2.07	0.69	0.81	1.21	0.39	4.58	4.6	5.21	4.46	12.74	11.3	12.59	9.56	0.29	0.24	0.35	0.33	4.53	5.55	2.75	3.91	20.3	19.28	20.44	16.9
Hgfac	14.84	4.59	18.94	6.97	0.39	0.48	0.49	0.45	8.23	6.92	6.69	5.94	70.81	67.71	70.25	75.43	0.35	0.37	0.46	0.5	13.63	11.59	3.08	6.2	7.02	7	6.14	6
Pcdh7	5.62	2.8	5.54	5.35	3.38	3.99	4.15	3.07	2.31	2.3	1.86	2.21	2.68	2.49	3.36	2.25	0.36	0.36	0.41	0.52	10.81	9.76	8.15	9.95	18.25	20.05	19.81	18.83
Crmp1	0.04	0.03	0.04	0.08	0.11	0.18	0.18	0.16	0.02	0.22	0.17	0.09	0	0.04	0.04	0.06	2.45	2.28	2.21	2.34	0.14	0.25	0.14	0.07	0.1	0.13	0.14	0.07
Stk32b	0.27	0	0.02	0.02	11.56	10.13	11.82	10.32	0.67	0.71	0.59	1	0.14	0.03	0.02	0.04	0.77	1.01	1.1	1.15	1.95	1.13	1.04	1.88	0.44	0.29	0.39	0.2
Nsg1	0.62	0.27	0.52	0.47	0.95	0.73	1.27	0.68	2.04	1.54	2.35	1.36	0.3	0.42	0.5	0.32	8.43	7.86	8.33	8.41	1.47	1.88	1.91	1.52	1.31	1.6	1.47	1.28
Rnf32	1.75	0.69	2.01	2.32	2.66	2.65	3.48	3.49	5.5	4.66	6.48	5.57	1	1.63	0.91	0.97	67.41	68.01	70.38	68.11	1.99	1.82	1.39	2.45	1.12	1.07	1.1	0.98
Plb1	1.42	0.98	1.09	0.98	0.55	0.47	0.53	0.47	0.7	0.62	0.66	0.6	0.23	0.51	0.17	0.77	35.57	31.67	33.37	35.38	0.88	0.72	0.41	0.67	0.46	0.57	0.29	0.41
4930548H24Rik	0.07	0.14	0.17	0.09	0.19	0.14	0.16	0.18	0.32	0.22	0.4	0.48	0.13	0	0.02	0.05	4.21	5.33	4.64	3.61	0.06	0.06	0.15	0.18	0.05	0.24	0.11	0.14
Ppm1g	26.35	15.74	27.95	25.58	28.93	30.18	32.02	20.11	24.3	24.13	28.42	24.78	32.39	34.87	35.26	33.76	144.57	170.11	131.43	187.83	25.65	24.88	22.51	24.6	26.1	22.96	26.49	25.32
Ociad2	12.99	5.11	14.27	10.65	3.7	3.33	4.88	2.7	9.82	9.06	10.07	8.46	42.16	48.44	45.23	34.56	0.6	1	0.49	0.6	10.28	12.5	3.62	7.24	12.49	12.87	12.54	17.46
Spata18	5.46	3.86	5.05	7.23	9.98	11.11	9.04	8.4	68.85	68.39	76.68	67.42	6.05	6.07	4.29	4.22	306.63	304.16	305	284.11	24.3	19.48	15.27	26.14	2.32	0.57	0.66	4.4
Cgref1	0.37	0.63	0.6	0.31	0.54	0.43	0.46	0.19	9.15	9.95	8.74	6.37	0.92	0.67	0.72	0.66	0.26	0.11	0.15	0.04	0.37	0.32	1.14	0.78	1.52	1.76	1.2	2.13
Khk	16.05	6.65	12.76	8.47	6.9	6.04	6.12	4.26	51.78	49.79	51.32	38.58	6.72	7.22	7.33	8.83	1	1.36	1.07	0.97	6.24	5.36	6.38	6.62	8.17	10.07	8	10.25
Agbl5	14.51	7.08	11.03	12.21	7.62	8.11	9.08	5.73	25.98	26.51	34.07	24.07	15.31	12.9	14.56	12.28	210.97	208.57	228.13	209.48	9.55	11.03	7.46	8.83	8.72	7.6	8.77	8.08
Ppargc1a	1.21	0.55	1.17	0.95	0.54	0.82	0.75	0.65	10.85	10.47	11.14	11.32	0.83	0.98	0.8	0.99	0.77	0.64	0.35	0.66	0.79	0.47	0.72	0.84	0.56	0.67	0.63	0.57
Dpysl5	0.08	0.03	0.07	0.15	0.31	0.2	0.21	0.06	0.22	0.37	0.68	0.26	0.08	0.2	0.08	0.07	15.19	14.91	15.8	14.78	0.44	0.3	0.26	0.32	0.5	0.36	0.51	0.45
Pi4k2b	1.32	0.32	1.35	1.39	4.83	4.91	6.05	5.14	6.84	5.86	7.26	6.87	0.98	1.46	1.3	0.99	35.29	38.21	41.24	37.89	4.28	4.12	5.36	3.48	6.24	6.2	6.05	6.08
Nsun7	0.36	0.21	0.35	0.58	0.41	0.81	0.63	0.7	1.22	0.98	2.18	1.15	0.46	0.93	0.27	0.26	67.02	64.9	66.69	64.62	2.08	2.42	2.01	2.24	8.02	7.84	6.92	7.46
Gabra4	3.77	2.28	4.21	5.65	2.1	1.37	2.36	1.72	0.4	0.47	0.28	0.32	0.07	0.14	0.43	0.45	0.08	0.12	0.13	0.1	0.24	0.14	0.18	0.25	0.11	0.13	0.29	0.33
Tec	4.04	2.27	4.65	4.87	1.45	1.97	2.6	1.72	15.3	16.04	17.39	17.29	5.87	6.3	5.97	6.61	0.72	0.42	0.76	0.6	1.51	1.74	10	1.9	3.85	3.81	2.99	3.28
Uchl1	3.73	1.1	3.3	3.38	0.82	1.17	0.56	0.52	2.38	2.36	1.9	1.55	16.82	16.36	11.56	14.93	21.32	22.93	24.15	24.31	2.06	1.79	1.75	1.14	3.2	3.17	3.11	3.76
Pdgfra	24.87	11.24	32.15	24.2	15.44	14.89	18.5	12.46	31.68	31.82	36.4	34.73	71.67	76.91	74.8	62.83	3.31	3.21	3.94	4.1	18.36	16.63	27.43	16.81	22.19	21.83	22.97	23.42
Pdcl2	0.3	0.39	0.44	0.98	0.71	1.8	1.59	1.31	0.58	0.45	2.87	0.61	0.95	1.84	0.72	0.91	275.67	290.45	286.47	282.77	1.3	2.13	1.75	2.09	0.37	0.06	0.05	0.25
Nmu	0	0	0	0	0	0	0	0	0	0	0	0.08	0	0	0	0	0	0.06	0	0.07	0	0	0	0	1.36	0.89	1.05	2
Epha5	0.24	0.19	0.17	0.17	0.03	0	0	0.02	0.01	0.01	0.01	0.01	0	0.02	0	0.02	0.07	0.06	0.14	0.17	0	0.03	0	0.02	0.01	0.05	0.08	0.08
Thegl	0.24	0.22	0.34	0.49	0.34	0.29	0.45	0.45	2.94	2.35	4.35	2.35	0.81	1.13	0.18	0.63	125.44	118.47	107.86	114.01	0.58	0.72	0.68	0.65	0.11	0	0	0.04
Stap1	7.74	7.88	15.33	16.24	17.35	18.32	20.87	24.25	0.16	0.39	0.38	0.31	3.11	6.07	4.77	9.72	0.1	0.12	0.23	0.23	11.35	10.28	13.72	14.1	0.62	0.62	0.5	0.9
Dr1	5.77	1.71	6.55	7.07	7.06	6.58	7.79	6.05	8.62	7.99	8.65	9.81	6.71	7	8.51	6.74	46.57	44.43	45.33	49.31	7.26	7.1	11.19	7.03	8.83	9.95	8.61	8.93
Fam69a	1.92	0.84	1.62	1.65	18.86	17.81	20.67	15.53	4.2	4.06	5.15	4.76	0.85	1.34	1.41	1.44	3.35	3.61	3.96	3.17	2.59	2.48	4.39	2.53	6.74	7.21	7.62	6.82
Sult1e1	1.77	0.86	2.29	3.41	36.91	37.26	50.82	45.94	10.13	9.9	7.67	16.15	0.62	1.38	1.33	1.48	9.88	10.1	9.03	6.81	7.14	7.92	10.39	8.21	13.7	13.05	8.19	7.8
Sult1d1	0	0.03	0.02	0.03	1.35	1.26	1.33	2.4	6.1	7.16	7.64	8.96	0.35	0.52	0.76	0.29	0.05	0	0.02	0	0	0	0	0.12	0.05	0.08	0.03	0
Gfi1	0	0	0.08	0	0	0.04	0.04	0.02	0.1	0.14	0.09	0.02	0.12	0.06	0	0.02	1.22	1.18	1.26	1.38	0.19	0.08	0.2	0	0.02	0.21	0.15	0
Brdt	0.21	0.27	0.49	0.51	0.34	0.57	0.69	0.44	0.75	0.74	1.93	0.64	0.37	0.99	0.44	0.49	61.32	59.7	62.58	57.36	0.66	0.72	0.64	0.93	0.99	0.7	0.8	0.55
Cdc7	0.56	0.37	0.66	0.61	0.44	0.63	0.89	0.44	1.26	1.01	0.89	1.2	0.32	0.45	0.53	0.6	7.34	6.54	7.3	7.44	1.11	1.05	1.52	1.02	1.54	1.31	1.35	1.24
Spp1	0.08	0.05	0.08	0.04	0.34	0.21	0.07	0	9.71	14	11.46	15.25	0.19	0.38	1.26	0.59	0.29	0.24	0.18	0.24	0.39	0.47	543.76	0.82	0.04	0.04	0	0.1
Gpat3	0.19	0.02	0.28	0.23	0.34	0.67	0.94	0.34	2.79	3.7	3.22	4.62	0.14	0.13	0.14	0.27	8.1	7.89	9.84	8.91	0.64	0.61	0.78	0.57	1.66	1.74	1.62	1.45
1700016H13Rik	1.15	0.84	1.36	2	2.67	2.2	2.95	1.98	0.43	0.23	3.14	0.67	0.39	1.34	0.59	0.74	129.86	149.09	136	129.88	7.8	4.29	4.31	7.32	0.48	0.09	0.21	0.73
Plac8	81.28	27.05	56.24	67.2	4.99	4.34	6.02	3.29	6.76	5.4	6.12	7.39	14.75	15.83	20.24	13.89	5.22	4.81	5.83	5.55	10	10.72	16.81	7	395.21	334.85	376.17	299.55
Bmp3	0.2	0.03	0.1	0.07	0.09	0.11	0.11	0.11	0.58	0.73	0.48	0.52	0.08	0.1	0.06	0.15	0.01	0	0.02	0	1.49	1.77	0.7	1.53	59.31	56.5	60.77	58.85
Tpst2	109.15	42.44	123.04	82.86	9.78	9.26	9.44	3.79	96.16	91.41	82.83	86.8	408.26	372.02	416.96	361.24	2.71	2.68	2.91	2.42	32.99	30.58	23.11	30.71	13	9.92	12.85	10.6
Tesc	0.58	0.15	0.45	0.12	0.81	0.67	0.75	0.27	20.69	24.05	17.56	21.85	1.15	1.27	1.6	0.67	1.32	1.89	2.27	1.66	1.03	0.85	0.56	1.14	0.24	0.19	0.24	0.29
Nos1	0.15	0	0.03	0.02	2.19	3.16	2.72	1.96	0.24	0.19	0.16	0.12	0.03	0.04	0	0.04	0.5	0.41	0.42	0.46	1.52	1.36	0.75	1.76	0.06	0.01	0.02	0.01
Alb	0	0.11	0.09	0.06	0.38	0.28	0.05	0.11	0.03	0	0.09	0	0.03	0.03	0	0	0.08	0.05	0.08	0.09	0.12	0.12	0.03	0.14	0.03	0	0.06	0.04
Afm	0.36	0.12	0.24	0.36	0.7	0.28	1.06	1.17	0.36	0.35	1.04	0.61	0.09	0.02	0.12	0.03	2.5	2.37	4.18	3.14	0.29	0.31	0.24	0.82	0.53	0.73	0.88	1.22
2010109A12Rik	1.36	1.33	1.52	2.1	2.17	2.86	3.74	2.29	2.01	1.3	1.6	2.06	2.14	2.18	1.2	1.72	23.92	25.92	27.2	20.57	4.38	3.26	2.54	2.99	1.99	2.18	2.1	2.29
Rilpl1	9.98	4.99	13.45	8.96	3	3.97	3.72	2.19	10.06	12.32	10.18	9.58	52.95	49.8	47.95	44.05	0.8	0.73	0.94	1.08	4.47	4.51	4.14	3.84	5.08	5.72	5.1	4.37
Cdkl2	3.8	1.99	4.57	4.64	1.74	1.77	1.91	1.52	5.83	4.28	7.25	5.17	4.34	5.41	4.07	4.29	39.72	38.65	41.16	43.5	3.17	3.02	2.68	2.82	8.59	7.66	8.26	8.2
Abcb9	5.66	1.13	5.83	2.75	3.6	2.85	3.4	1.63	2.17	1.77	1.94	2.01	34.28	30.72	44.29	25.14	11.07	11.7	10.47	11.16	3.62	3.1	1.96	3.24	4.82	4.12	4.32	4.02
Kntc1	0.29	0.1	0.3	0.4	0.36	0.22	0.37	0.17	1	0.42	1.16	0.96	0.51	0.6	0.68	0.29	11.36	11.83	12.27	13.3	0.44	0.46	0.72	0.38	1.08	0.79	1.35	0.94
Ran	20.38	9.35	22.52	21.82	19.21	18.87	20.66	15.09	17.44	16.1	18.72	16.45	14.9	16.93	17.51	17.17	88.65	95.78	108.28	93.23	17.06	19.17	17.7	16.88	19.51	16.19	16.75	16.52
Diablo	10.96	5.11	10.68	11.92	9.78	9.37	9.96	7.05	13.63	9.9	12.66	11.17	10.21	12.22	10.83	10.66	97.34	101.46	99.23	108.82	10.49	10.12	10.67	9.31	14.85	13.99	12.87	14.02
Mmp17	1.3	0.52	1.26	1.04	0.4	0.63	0.51	0.33	0.93	0.78	0.83	0.8	0.58	0.52	0.92	0.97	0.22	0.17	0.31	0.22	2.11	2.65	1.77	1.88	7.16	6.62	8.2	6.03
Bcl7a	18.33	7.4	13.72	14.11	12.41	10.76	14.41	8.74	57.01	55.68	58.01	53.44	12.52	11.47	12.53	10.69	0.66	0.9	0.45	0.59	16.14	15.47	10.16	16.04	17.07	20.22	19.2	18.16
Hpd	0	0	0	0	0	0	0	0.08	0	0.05	0	0	0	0	0	0.05	0.39	0.33	0.16	0.38	0	0	0	0	0	0	0	0
Psph	6.52	2.33	5.97	6.27	32.85	25.66	34.83	21.5	2.76	2.09	2.11	1.95	1.99	2.13	2.55	2.83	3.93	3.22	4.18	3.86	16.77	15.8	13.18	16.92	5.74	4.61	5.65	5.12
Fam216a	7.27	3.68	10.2	9.8	6.25	7.38	7.94	5.33	27.29	28.58	30.24	27.77	9.32	10.04	11.21	9.57	92.5	101	106.28	94.51	6.65	5.53	6.21	8.03	6.29	6.97	6.04	6.17
Morn3	1.32	1.22	1.13	1.25	2.05	1.99	2.01	1.47	20.18	22.04	18.77	15.01	1.24	1.42	1.68	1.06	73.62	97.58	78.93	75.94	3.14	2.6	1.73	3.28	0.22	0	0.11	0.47
Pde6b	0.06	0.06	0.04	0.09	0	0.03	0	0	0	0	0.02	0	0	0	0.03	0	0.05	0	0.01	0	0	0	0	0	0	0.03	0	0.06
Gpc2	2.37	1.29	1.79	2.1	0.33	0.26	0.6	0.1	0.37	0.48	0.54	0.58	0.33	0.16	0.32	0.58	0.73	0.58	0.82	0.63	0.35	0.23	0.55	0.24	0.62	0.35	0.34	0.35
Cit	2.13	1.01	1.73	1.79	0.41	0.69	0.69	0.36	1.01	1.08	1.45	0.92	1.01	0.86	0.97	0.6	12.46	11.84	11.38	14.86	0.8	0.76	0.89	0.85	0.67	0.6	0.84	0.77
Cyp2w1	0	0	0	0.04	0	0	0	0	0.23	0.26	0.13	0.3	0	0	0.08	0	0	0	0	0.04	0.04	0.08	0.03	0	0	0	0	0
Cabp1	0.36	0.04	0.22	0.31	0.28	0.13	0.54	0.18	0.42	0.27	0.16	0.33	0.34	0.25	0.37	0.32	2.52	1.88	2.34	2.93	0.18	0.16	0.24	0.11	0.37	0.34	0.25	0.27
Tfec	0.04	0.09	0.09	0	0.17	0.04	0.18	0.16	4.06	3.32	4.35	4.75	0.25	0.27	0.32	0.17	0.08	0.06	0.11	0.09	0.17	0	2.2	0.05	0.28	0.1	0.26	0.2
Mad1l1	6.79	3.99	5.45	5.3	6.26	7.24	7.68	4.44	8.05	7.81	7.32	7.94	5.78	5.13	5.92	4.55	6.08	6.95	6.21	7.88	5.8	5.97	6.03	5.52	30.13	29.96	35.66	43.94
Hnf1a	0.02	0.02	0.02	0.02	0	0.02	0	0	19.18	21.69	19.33	17.18	0.46	0.63	0.84	0.28	0.15	0.14	0.24	0.11	0	0	0	0	0	0.02	0.04	0
Snx8	6.62	1.31	4.31	4.01	8.88	9.67	9.63	5.11	15.12	15.98	16.02	13.98	1.76	1.54	1.97	2.31	1.47	1.44	1.82	1.87	32.99	29.94	27.94	29.64	10.59	11.22	9.33	8.69
Radil	0.75	0.19	0.6	0.5	0.75	0.69	0.68	0.39	3.31	2.82	3.86	2.48	0.34	0.58	0.6	0.34	16.52	16.58	18.81	17.24	1.09	1.11	1.12	1.02	2.28	1.83	2	1.55
Iqcd	2.7	3.19	2.78	2.03	0.15	0.52	0.69	0.1	14.38	16.12	14.49	14.79	2.51	1.88	1.82	2.12	26.51	28.63	27.89	27.7	0.18	0.35	0.25	0.4	0.3	0.24	0.26	0.36
Rasal1	0.47	0.05	0.27	0.36	0.44	0.36	0.19	0.1	1.2	1.08	1.02	1.22	0.17	0.11	0.19	0.27	3.69	4	4.66	3.36	0.65	0.76	0.59	0.59	1.87	1.78	1.85	1.57
Ankrd61	0.5	0.34	1.28	1.48	1.01	1.8	2.28	0.9	0.27	0.3	3.39	0.15	0.47	0.58	0.34	0.64	71.26	73.54	84.66	62.92	0.33	0.53	0.42	0.73	1.06	0.68	1.36	0.89
Ocm	0	0	0	0.39	0	0	0.08	0	0.83	0.5	0.49	0.1	0.11	0	0	0	0	0	0.17	0	0	0	0	0	0.19	0	0	0.11
Cdx2	0.24	0.17	0.03	0.2	0	0	0	0	0.06	0.23	0	0.03	0	0	0	0	0	0	0.02	0	0	0	0	0	0	0	0	0
Flt1	3.04	1.88	4.01	3.35	1.99	2.7	2.09	1.6	3.33	4	3.49	4.51	12.14	11.47	12.97	8.55	0.98	1.07	1.13	1.14	1.78	1.66	2.47	1.44	5.49	5.33	5.09	4.07
Mtus2	10.88	4.87	7.41	9.4	0.71	0.79	0.75	0.44	1	1.33	1.02	1.16	6.05	5.1	5.28	4.4	0.85	0.61	0.56	0.89	1.97	2.05	1.04	1.74	0.27	0.57	0.49	0.61
Wdr95	0.16	0.18	0	0.07	0	0.07	0.02	0.02	28.69	25.58	29.35	27.5	1.3	1.6	1.94	0.79	2.31	2.03	2.6	1.61	0.09	0.11	0.12	0.04	0.1	0.1	0	0.03
Tex26	0	0.05	0.24	0.31	0.04	0.3	0.23	0.15	3.19	3.22	3.65	2.64	0.19	0.31	0.21	0.17	29.57	33.45	34.15	29.32	0.49	0.28	0.22	0.62	0.09	0.14	0.26	0.1
Tfpi2	0	0.1	0.11	0	0.17	0.24	0.43	0.25	6.75	5.53	7.23	6.47	0.23	0.26	0.52	0	0.07	0.03	0	0.04	0.7	0.38	1.11	0.55	0.29	0.22	0.37	0.1
Wnt16	0.02	0	0.02	0	0.18	0	0.02	0.02	0	0.04	0	0.02	0	0	0	0	0	0	0	0	0.2	0.07	0.05	0.17	0.02	0	0.06	0
Asb15	0.2	0.02	0.13	0.13	1.31	1.23	1.34	1.33	0.02	0.02	0.13	0.04	0.02	0.09	0	0.04	6.68	8.69	9.92	7.01	0.96	0.5	0.58	0.6	0.06	0.14	0.11	0.15
Lrwd1	5.81	1.56	4.49	4.72	5.45	4.83	6.05	3.04	19.97	19.4	21.62	16.06	5.24	4.9	5.39	5.46	87	94.56	95.57	95.22	6.35	6.21	5.85	6.01	6.98	6.46	7.24	5.69
Fscn3	1.15	0.52	0.98	1.18	0.71	0.66	1.66	0.64	0.4	0.66	3.7	0.86	0.51	1.26	0.39	0.7	110.59	103.79	103.67	106.95	2.11	1.91	1.53	2.77	0.63	0.18	0.23	0.43
Ephb4	6.92	1.99	6.3	4.83	4.92	4.58	5.17	2.29	29.91	30.45	30.45	28.97	6.14	5.96	8.2	6.56	1.32	1.05	1.32	1.32	7.67	5.96	8.23	6.11	11.33	11.05	12.41	10.78
Epo	0.07	0	0	0	0.23	0.58	0.19	0.19	0	0	0	0	0	0	0	0	0	0	0	0	0.07	0.14	0.25	0.07	0	0	0	0
Cyp3a13	0.02	0	0.04	0.02	0.02	0.06	0.02	0.02	0.21	0.07	0.09	0.04	0.02	0.08	0.04	0.02	0.04	0	0	0	0.08	0.1	0.02	0.06	0.34	0.34	0.36	0.36
Mcm7	6.71	2.11	6.19	4.77	7.88	6.51	8.5	4.72	18.93	16.74	18.16	18.95	7.32	7.21	8.47	5.12	54.54	56.04	58.63	54.17	9.52	8.01	8.96	7.07	7.78	6.31	6.41	7.53
Asns	13.87	4.99	11.26	14.51	11.29	10.31	13.4	7.84	3.53	3.51	3.74	3.42	3.68	4.79	3.27	5.46	78.81	83.1	82.09	82.34	8.94	9.09	7.76	9.2	10.87	11.45	11.73	11.73
Dlx5	0.17	0.16	0.08	0.18	0.05	0	0	0.08	0.05	0.09	0.09	0.09	0.39	0.16	0.21	0.31	2.84	3.53	4.17	2.53	0	0.08	0	0	0	0.19	0.04	0
Dync1i1	0.74	0.31	0.79	1.27	0.17	0.18	0.18	0.1	1.01	0.9	0.75	0.77	0.33	0.23	0.25	0.4	5.16	5.07	4.79	4.81	0.26	0.37	0.14	0.06	0.44	0.59	0.96	0.64
Cald1	10.94	10.99	13.81	12.42	8.18	9.84	8.65	6.83	16.7	18.85	18.2	19.21	11.13	11.38	13.26	14.13	2.96	3.09	3.89	3.38	44.44	51.78	41.53	43.57	254.67	284.05	245.61	249.56
1700012A03Rik	4.07	0.87	2.11	3.53	11.88	11.74	9.14	9.12	0.57	0.55	1.53	0.88	0.58	0.83	0.7	1.38	112.81	110.63	110.94	100.56	21.98	18.91	13.45	25.31	3.06	0.42	0.19	2.5
Ccdc136	4.14	3.17	3.37	4.24	7.95	10.85	8.44	8.21	3.54	2.73	9.73	2.69	1.79	2.87	1.58	2.03	228.1	248.33	196.05	265.97	18.85	18.37	10.56	18.55	12.74	13.89	12.44	13.25
Adcyap1r1	0.56	0.07	0.31	0.27	0.23	0.15	0.45	0.24	1.12	1.94	1.4	2.79	0.41	0.34	0.61	0.37	0.18	0.23	0.12	0.22	0.48	0.68	1	0.41	3.67	4.43	4.88	3.39
Ssmem1	0.27	0.06	0.48	0.43	0.72	1.4	0.95	0.95	0.77	0.39	2.96	0.29	0.73	1.24	0.5	0.9	151.14	165.55	183.19	148.24	0.71	1.14	0.51	1.21	0.05	0.05	0.14	0.28
Cpa5	0.19	0.17	0.13	0.26	0.44	0.49	0.61	0.58	0.13	0.06	1.17	0.12	0.29	0.24	0.08	0.06	32.56	32.98	39.14	31.3	1.3	0.83	0.77	0.85	0.11	0	0	0.17
Abcg2	3.02	1.07	2.86	2.02	1.72	1.57	1.71	1.31	4.34	4.28	6.06	5.22	5.32	6.73	6.7	6.07	8.68	8.14	8.64	8.28	2.1	2.11	4.32	1.96	522.69	492.15	515.45	552.94
Aoc1	0.86	0.4	0.82	0.82	1.52	1.61	1.47	0.84	8.43	7.85	6.42	6.69	0.72	0.69	0.54	0.42	0.17	0.05	0.19	0.06	0.84	0.77	0.43	0.73	4.21	4.62	4.65	3.61
Igf2bp3	0.19	0.23	0.59	0.46	0.27	0.45	0.19	0.22	0.38	0.21	0.6	0.12	0.16	0.14	0.14	0.31	32.3	31.2	30.67	33.31	0.65	0.66	0.33	0.63	0.01	0.03	0.07	0.12
Npy	29.05	11.05	8.31	19.84	1854.29	1662.35	1328.79	1342.71	0	0.12	0.45	0.35	0	0	0	0.22	0.1	0.09	0	0	134.65	72.33	165.38	156.68	0.22	0.12	0.44	1.06
Osbpl3	0.82	0.4	0.51	0.66	0.61	0.63	0.63	0.33	13.19	11.86	12.25	13.62	1.17	1.2	1.14	0.82	0.16	0.19	0.11	0.25	1.16	0.78	1.82	0.92	1.59	1.78	1.8	1.78
4921507P07Rik	1.45	0.61	0.98	1.46	1.68	2.44	3.52	2.39	1.29	1.53	2.37	1.07	0.94	1.44	0.82	1.14	176.35	160.81	124.98	153.91	2.39	1.38	1.4	1.86	0.9	0.93	0.65	1.42
Tmem213	0.66	0.97	0.74	1.12	1.02	1.58	1.23	1.05	4.98	5.66	3.24	4.75	0.78	0	0.48	0.5	0	0	0	0	0.09	0	0.17	0.27	0.1	0	0	0
Svopl	2.04	0.92	2.11	1.93	2.17	2.59	2.01	1.71	12.41	11.3	12.82	13.59	1.38	1.88	1.54	2.44	0.19	0.23	0.25	0.24	1.29	1.27	1	1.41	0.27	0.25	0.32	0.45
Nfe2l3	25.2	11.09	24.71	25.8	2.55	3.31	4	2.87	0.51	0.39	0.1	0.28	9.52	11.41	6.31	14.49	0.62	1.43	1.24	1.49	6.09	5.25	4.78	4.38	3.28	3.09	3.15	4.69
Trim24	8.56	4.1	11.77	10.63	9.07	10.03	12.03	9.73	15.93	13.48	16.82	16.67	13.24	12.78	13.91	11.21	84	78.43	81.82	80.87	11.42	11.88	13.5	13.47	24.81	24.72	22.15	22.18
Slc23a4	2.21	0.42	0.59	1.5	22.91	18.55	24.82	15.34	0.44	0.27	0.38	0.39	0.42	0.37	0.25	0.26	0.25	0.19	0.4	0.38	0.79	0.51	0.36	0.77	0.38	0.46	0.37	0.52
Fam131b	0.19	0	0.01	0.05	0.14	0.26	0.04	0.04	0.15	0.02	0.16	0.11	0.02	0.04	0	0.03	4.27	4.31	3.34	4.06	0.58	0.31	0.45	0.42	0.29	0.49	0.33	0.2
Llcfc1	1.36	1.24	2.43	3.38	3.21	3.96	3.51	3.65	1.01	0.36	7.94	0.53	1.23	2.62	1.15	0.34	250.72	311.6	309.09	232.96	10.93	9.8	6.85	8.62	1.27	0.81	0.92	2.53
Ephb6	23.48	8.15	17.9	16.39	2.44	2.77	3.02	1.37	2.4	2.51	1.63	2.41	11.08	10.33	11.99	10.45	0.49	0.45	0.48	0.68	6.47	5.98	4.71	5.81	8.83	9.08	7.87	7.94
Ccdc184	1.12	0.33	0.75	0.47	0.58	0.72	0.62	0.43	0.23	0.2	1.04	0.17	0.21	0.25	0.39	0.3	13.96	20.43	23.73	15.08	1.95	1.43	1.79	2.07	0.54	0.69	0.72	0.97
1700074P13Rik	0.32	0.14	0.32	0.55	0.51	0.49	1.41	0.8	0.29	0.4	1.94	0.47	1.1	2.05	0.41	0.46	255.28	246.52	234.64	248.64	1.29	1.39	1.06	1.97	0.04	0.08	0.04	0.18
C130060K24Rik	0.02	0	0.02	0	0	0	0	0	0.07	0.07	0.15	0.07	0.31	0.31	0.21	0.41	0.02	0	0	0.02	0	0	0.02	0	0.09	0.07	0.06	0
Add2	0.02	0.04	0.02	0.02	0.06	0.02	0.03	0.03	0.14	0.11	0.14	0.07	0.01	0.01	0.04	0	0.61	0.54	0.47	0.63	0.03	0.01	0.02	0.01	0.02	0.02	0	0.01
1700003E16Rik	2.29	2.06	3.11	3.19	3.76	3.92	3.99	3.02	12.22	11.59	20.61	12.61	1.45	3.26	1.06	2.57	264.16	283.93	279	254.64	7.71	5.66	4.57	6.98	0.61	0.48	0.36	1.52
Wdr54	0.4	0.44	0.35	0.5	0.17	0.12	0.35	0.12	3.02	3.47	3.47	3.22	0.32	0.36	0.34	0.38	7.03	6.95	8.27	6.81	0.4	0.4	0.25	0.37	0.43	0.68	0.64	0.57
M1ap	1.04	0.27	0.84	0.46	1.36	2.22	1.54	0.8	0.14	0.2	1.45	0.27	3.88	3.35	3.58	3.19	31.11	35.5	37.01	24.83	3.07	2.44	2.04	2.28	0.29	0	0	0.46
Arhgap25	0.54	0.42	0.59	0.47	1.04	1.15	1.41	0.74	1.18	1.14	0.74	0.92	1.19	0.96	0.98	0.81	0.06	0.07	0.11	0.14	1.25	1.32	12.68	1.38	0.77	1.05	0.85	1.24
Gp9	0.4	0	0.4	0.15	4.96	3.9	5.4	3.26	0.08	0.08	0	0	0	0	0	0	0	0	0.06	0	0.27	0.13	0.12	0	0	0.08	0.14	0
Gxylt2	0.89	0.46	0.99	0.67	0.79	0.68	1.14	0.61	16.27	16.17	17.94	19.77	1.11	1.47	1.99	0.96	1.77	1.81	2.23	2	0.67	0.68	1.91	0.4	1.07	1.27	0.91	1.14
Chl1	0.78	0.42	0.83	1.08	1.85	2.38	1.83	2.18	0.57	0.4	1.95	0.3	0.35	0.85	0.35	0.62	79.69	81.38	85.25	75.24	5.02	5.1	3.31	4.67	1.77	1.6	1.67	2.27
Chchd6	6.38	2.74	6.08	5.16	3.12	3.12	2.64	2.3	17.99	16.68	18.12	14.15	4.68	4.78	4.99	4.87	48.47	56.37	56.62	49.78	5.03	4.79	3.83	5.13	3.81	3.9	2.9	2.74
Nup210	30.71	7.99	16.98	21.01	29.35	26.84	32.76	18.73	9.38	8.02	8.31	6.96	2.48	2.87	2.02	4.14	2.45	2.2	2.72	2.38	7.86	6.03	6.57	6.8	3.63	2.98	2.81	3.33
Cntn6	0.02	0.02	0.02	0.09	0.05	0.1	0.06	0.06	0.06	0.04	0.07	0.04	0	0.02	0	0.07	3.61	4.54	5.52	4.41	0.08	0.16	0.19	0.12	0.32	0.83	0.49	0.45
Grip2	0.38	0.06	0.35	0.23	0.36	0.35	0.35	0.08	1.3	0.98	1.23	1.32	0.57	0.32	0.4	0.36	0.02	0.06	0.04	0.06	0.67	0.7	0.78	0.89	10.04	10.48	11.67	8.53
Bhlhe40	36.31	14.6	38.76	26.54	22.18	19.3	19.97	13.64	47.57	54.73	52.67	41.44	97.72	85.13	90.95	95.51	1.88	1.43	1.54	1.44	37.36	33.77	33.01	30.86	11.07	12.45	9.15	12.71
Slc6a13	4.36	1.2	2.52	2.81	0.12	0.2	0.22	0	30.91	29.27	31.44	30.81	6.51	5.6	6.47	3.08	0.32	0.18	0.32	0.4	0.29	0.31	0.12	0.05	0.39	0.54	0.08	0.2
Slc6a12	4.45	0.95	2.59	3.4	0.1	0.07	0.08	0.04	1.06	1.28	1.11	1.16	0.21	0.09	0.32	0.12	0.12	0.17	0.16	0.2	0.09	0.07	0.22	0.04	0.28	0.15	0.12	0.11
Ret	1.02	0.32	2.05	0.61	5.96	2.8	5.85	2.11	26.25	20.01	20.53	18.34	8.95	8.89	8.79	8.01	0.43	0.29	0.33	0.5	1.45	1.41	1.72	1.08	3.99	3.12	2.22	2.19
Klrg1	0.08	0	0.04	0	0.05	0	0	0	0.1	0.05	0	0	0	0.04	0	0.04	0.39	0.36	0.27	0.29	0.17	0.08	0.6	0.04	0.18	0.05	0	0.16
Tuba8	0.08	0.34	0.21	0.11	0.2	0.44	0.39	0.17	0.27	0.29	0.51	0.09	0.4	0.71	0.4	0.36	105.55	100.29	81.14	104.7	0.37	0.36	0.23	0.27	0.14	0.18	0.08	0.4
Clec4e	0	0	0	0	0.01	0.01	0.02	0.01	0	0	0.03	0.01	0	0.01	0	0.03	0	0	0	0	0.01	0	0.28	0.05	0.04	0.01	0.03	0.02
Clec1b	0.04	0	0.01	0	0.01	0.01	0.01	0	0.02	0.02	0.03	0.03	0	0.03	0.04	0	0	0.01	0	0	0.05	0.01	0.51	0	0	0.05	0.01	0.07
Olr1	0	0	0	0	0	0.02	0.02	0	0	0	0.02	0	0	0.02	0	0	0.15	0.01	0.08	0.08	0.15	0.2	0.22	0.19	0.02	0.02	0	0.02
Klrd1	0.13	0.17	0.25	0.35	0.14	0.61	0.3	0.24	0.3	0.58	0.63	0.85	0.23	0.44	0.27	0.21	0	0	0.06	0	0.32	0.45	3.91	0	2.53	2.03	1.76	2.12
Klrc1	0	0.04	0.06	0	0.1	0.06	0.11	0.11	0.03	0	0.06	0	0	0.06	0.03	0.16	0	0	0	0	0.12	0.09	0.4	0.06	0.41	0.34	0.28	0.15
Klra2	0.16	0.13	0.19	0.36	0.21	0.28	0.28	0.25	0.34	0.18	0.14	0.18	0.78	1.18	1.39	1.09	0.03	0	0.03	0	0.46	0.39	0.68	0.25	0.87	0.82	0.55	0.38
Ybx3	24.47	18.24	30.13	26.9	23.98	26.69	24.77	16.9	25.49	28.65	33.63	26.81	28.77	28.74	28.03	26.71	527.04	513.74	539.87	486.92	18.44	20.26	17.61	22.31	16.4	17.85	16.68	15.64
Bcl2l14	4.08	3.47	4.5	5.41	11.38	11.22	9.43	9.85	2.77	3.24	4.91	2.44	2.28	2.83	3.37	4	125.1	128.01	139.69	118.95	23.04	21.73	12.76	21.95	10.02	11.42	9.18	12.79
Gsg1	10.7	2.67	5.9	9.99	13.66	14.8	18.36	12.82	4.31	3.76	28.94	4.25	4.51	5.29	2.65	4.57	962.17	959.27	997.62	931.17	40.34	32.9	26.59	42.39	3.04	0.37	0.44	7.48
Grin2b	0	0	0.02	0.01	0	0.02	0.02	0	0.08	0.08	0.09	0.15	0.01	0	0	0	0.69	0.62	0.72	0.72	0.04	0.01	0.01	0.01	0.03	0.03	0.03	0.01
Plbd1	2.54	1.48	2	2.21	6.4	6.71	7.91	3.76	6.81	7.61	6.09	6.11	2.52	3	2.25	1.87	30.12	26.95	31.54	31.43	6.89	5.07	12	5.01	4.45	5.93	3.35	4.12
Wbp11	20.85	11.72	17.97	17.68	13.1	17.56	18.5	11.7	26.11	26.05	29.24	25.06	17.7	17.15	17.16	15.56	144.68	125.03	130.7	137.14	17.14	17.79	16.76	16.89	17.86	16.46	15.27	17.13
Art4	7.48	3.06	7.54	7.62	21.94	24.51	27.47	19.68	1.85	2	3.1	2.51	3.22	3.38	3.47	4.14	0.46	0.26	0.43	0.59	11.79	9.77	11.6	10.55	6.34	6.73	6.98	8.38
Ptpro	9.84	4.24	7.79	9.69	57.58	52.63	71.57	46.78	0.68	0.87	0.84	0.79	0.37	0.4	0.48	0.42	0.19	0.21	0.41	0.41	9.77	8.92	12.45	8.29	2.44	2.17	2.13	2.59
Lmo3	0	0	0.05	0.02	0	0	0	0	0	0	0	0.02	0	0.02	0	0	0.01	0.03	0.03	0.02	0.08	0.02	0.04	0.03	0.02	0.16	0.24	0.18
Plcz1	0.42	0.17	0.87	0.99	0.93	1.1	0.93	1.58	0.42	0.29	2.85	0.32	0.55	1.18	0.3	0.7	133.51	144.84	149.38	133.72	2.19	2.63	2.86	3.23	1.49	0.85	1.45	1.85
Slco1c1	0.24	0.07	0.24	0.06	0	0	0	0.05	0	0	0.06	0.1	0.13	0.25	0.06	0.5	0	0	0	0	0	0	0.07	0.05	0.12	0.06	0.14	0.02
Slco1b2	0.02	0	0	0.02	0.54	0.79	0.92	0.94	0	0	0	0	0	0	0	0	0.05	0.06	0	0	0.04	0.07	0.02	0.07	0	0.04	0	0
Gys2	0	0	0	0	0	0.05	0	0	0.18	0.1	0.17	0.1	0.08	0	0	0	0	0	0.06	0	0.02	0	0.04	0	0.02	0	0.02	0
Abcc9	2.04	0.98	2.41	2.04	2.6	2.51	2.23	1.49	1.98	2.12	1.93	1.89	0.91	1.16	1.62	1.19	0.63	0.7	0.96	0.92	2.52	3.05	3.27	2.66	13.15	12.89	13.35	13.27
Rad18	4.3	2.09	6.26	5.72	3.09	3.64	3.43	2.95	3.35	3.57	4.07	3.87	4.51	5.33	5.51	4.4	23.18	24.54	25.8	24.99	3.35	3.98	3.61	3.77	4.58	4.13	4.65	4.86
Bhlhe41	34.11	14.22	27.29	26.47	2.22	2.18	2.31	1.52	13.69	13.59	13.79	14.82	28.82	31.75	30.36	27.75	0.37	0.33	0.37	0.46	3.82	4.06	8.63	4.05	5.2	4.94	5.08	3.94
Cidec	0.35	0.35	1.38	0.11	4.04	8.82	17.74	3.76	63.95	65.31	43.18	92.83	0.77	0.07	0.85	0.66	0.06	0.21	0.06	0.14	2.96	1.12	0.15	0.46	14.49	18.42	7.07	3.32
St8sia1	0.01	0.01	0	0	0.03	0.04	0.04	0	0.38	0.41	0.58	0.37	0.09	0.11	0.02	0.02	0.78	0.62	0.55	0.64	0.04	0.06	0.06	0.01	0.03	0.02	0.03	0.02
Smco2	0.09	0.12	0.32	0.4	0.3	1.13	0.69	0.56	0.38	0.26	1.86	0.1	0.44	0.99	0.24	0.25	90.39	85.7	81.47	85.76	0.93	0.96	0.33	0.53	0.1	0.1	0.05	0.12
Ccdc91	13.49	7.1	12.06	12.21	18.43	15.26	18.62	13.72	12.46	12.13	14.41	10.62	7.63	7.92	7.37	8.66	98.52	112.29	94.49	113.11	16.16	14.05	12.32	14.79	12.56	11.64	11.84	11.97
Ift122	11.35	3.79	7.61	7.13	3.76	4.03	5.46	3.27	20.57	18.45	22.6	18.46	5.78	5.16	5.8	5.85	65.68	66.44	58.04	76.56	7.66	7.05	6.07	6.4	10.67	10.51	10.14	9.53
Klrb1c	7.74	2.7	13.63	6.36	0.12	0.05	0.21	0.11	0.08	0.18	0.15	0.1	110.08	137.22	126.22	108.2	0.19	0.16	0.06	0.07	0.14	0.11	0.77	0.15	0.55	0.33	0.76	0.74
Cd27	0.27	0.15	0.41	0.41	0.21	0.04	0.18	0.14	0.96	1.57	0.49	1.04	0.13	0.37	0.16	0.28	0	0	0.03	0	0.38	0.19	0.44	0.14	0.2	0	0.08	0.29
Cd9	77.05	59.69	116.6	98.9	30.89	29.29	32.33	21.9	104.11	101.27	103.77	100.91	204.19	222.05	208.14	231.36	2.98	2.92	3.02	2.89	74.96	65.58	99.96	68.66	71.38	68.98	69.23	81.94
Akap3	0.53	0.58	0.74	0.77	0.96	1.47	1.46	0.84	0.93	0.59	6.17	0.39	1.29	2.21	0.48	1.04	326.24	323.17	325.69	332.3	1.01	1.69	1.09	1.35	0.42	0.25	0.28	0.26
Rad51ap1	0.24	0.14	0.65	0.29	0.29	0.45	0.35	0.52	0.7	0.21	1.23	0.64	0.66	0.67	0.49	0.17	11.26	10.12	10.05	11.91	0.61	0.26	0.71	0.53	0.59	0.36	0.47	0.84
Prmt8	0.09	0	0	0.16	1.63	1.6	1.59	0.91	0	0	0	0	0	0	0	0	0.12	0.11	0.12	0.13	0.37	0.19	0.49	0.25	0	0	0.02	0.06
Tead4	0.89	0.37	0.53	0.58	0.29	0.22	0.56	0.18	2.51	2.6	2.25	2.43	0.77	0.43	0.73	0.84	0.02	0.08	0.07	0.1	0.6	0.42	0.38	0.49	1.04	0.98	1.07	0.78
Pzp	1	0.65	2.15	1.04	0.01	0.03	0.06	0.01	0.18	0.23	0.4	0.35	0.88	1.84	1.23	4.28	0.29	0.24	0.22	0.24	0.06	0.14	0.08	0.08	0	0	0	0.02
Klrb1a	19.15	10.36	25.92	23.37	0	0	0.09	0.13	0.05	0.1	0.05	0	42.89	47.86	47.86	41.34	0.26	0.12	0.09	0.37	0.05	0	0.42	0.35	0.2	0	0.24	0.06
Clec2h	0.08	0	0.11	0.12	0.06	0.49	0.56	0.33	0	0	0	0	0	0	0	0	0	0	0.03	0	1.92	2.11	1.05	1.95	0.06	0	0	0.07
Slc8a2	0.44	0.22	0.29	0.22	0.26	0.2	0.27	0.15	0.57	0.54	0.8	0.58	0.29	0.37	0.29	0.35	11.58	11.48	10.35	12.23	0.46	0.57	0.34	0.43	2.14	2.18	2.56	1.76
Ckm	0.3	0.28	0.28	0.35	0.42	0.34	0.24	0.06	0.25	0.07	0.16	0.21	0.08	0.1	0.02	0.18	0.54	0.24	0.24	0.17	8.11	9.65	4.09	4.49	25.33	24.98	28.13	21.69
Gipr	0.21	0.1	0.15	0.06	0.14	0.08	0.14	0.05	0.09	0.21	0.08	0.14	0.07	0.07	0.08	0.1	4.58	4.59	4.81	6.08	0.06	0.02	0.08	0.04	0.06	0.02	0.06	0
Dmpk	15.29	6.1	13.24	11.66	8.1	9.53	9.62	4.52	16.74	19.07	17.89	15.19	7.22	6.88	9.85	9.89	7.72	7.39	6.65	7.28	53.4	57.81	42.49	52.21	277.38	268.06	306.69	228.76
Pdcd5	14.84	7.52	14.16	16.73	7.19	7.21	9.78	8.9	10.93	8.34	9.15	10.8	8.41	11.06	8.8	9.57	46.82	40.2	47.19	34.89	6.54	7.67	6.93	6.94	5.81	6.25	5.07	6.68
Lilra6	0.02	0.03	0.02	0.02	0	0.11	0.14	0.04	0.12	0.07	0.07	0.02	0.03	0.02	0	0	0.04	0.02	0.12	0.06	0.23	0.15	0.65	0.22	0.05	0.02	0.04	0.05
Sbk2	0.11	0.07	0.26	0.11	0.23	0	0.25	0.12	0.09	0.15	0.09	0.06	0.72	0.74	0.55	0.45	0	0	0	0.03	0.37	0.08	0.43	0.03	0.06	0	0.06	0.07
Csrp3	0	0	0	0	0	0	0	0	0	0	0.05	0	0	0	0	0	0.04	0.02	0.04	0	0.51	0.19	0	0	0	0	0	0
Cyp2b10	0.03	0	0	0.1	0.1	0.1	0.17	0.14	0.25	0.1	0.03	0.1	0	0	0	0.03	0	0	0.03	0.12	0.12	0.09	0.08	0.03	2.72	3.83	3.63	4.11
Tdrd12	0.03	0.04	0.08	0.11	0.12	0.12	0.21	0.26	0.19	0.24	0.6	0.11	0.15	0.33	0.12	0.24	32.43	29.59	34.23	34.49	0.63	0.59	0.38	0.46	0.09	0.04	0	0.02
Slc7a9	2.53	0.84	1.5	1.72	0.18	0.24	0.16	0.26	91.57	86.24	90.19	84.06	2.45	2.79	3.98	2.12	0.26	0.1	0.16	0.14	0.48	0.34	0.56	0.21	0	0	0.24	0.07
Slc7a10	0.06	0	0.09	0	0.26	0.42	0.77	0.14	5.46	7.65	5.54	7.23	0.07	0.2	0.12	0.16	0.06	0.08	0.03	0.09	0.36	0.09	0.11	0.11	1.86	3.31	1.65	0.62
Cers3	0.64	0.33	0.5	0.69	0.69	1.75	1.57	0.92	0.21	0.12	1.04	0.08	0.09	0.28	0.15	0.16	47.16	46.62	53.01	51.64	2.38	2.88	2.13	3.05	1.53	1.21	1.24	1.34
Chrna7	0.06	0.03	0.08	0.14	0.11	0.04	0.02	0.04	0	0.14	0.25	0.05	0.02	0.06	0	0.09	0.58	0.8	0.77	0.5	0.15	0.17	0.17	0.12	0.42	0.14	0.33	0.37
Plin1	0.23	0.3	0.64	0.07	1.05	3.41	6.64	1.22	32.71	43.16	23.78	36.98	0.2	0.08	0.35	0.09	0.64	0.51	0.6	0.61	1.64	0.73	0.21	0.18	6.04	10.3	4.3	1.68
Rhcg	298.96	78	174.29	191.64	1.14	1.2	0.98	0.37	0.52	0.03	0.31	0.12	14.9	23.05	11.27	46.52	15.45	15.05	11.93	16.92	0.88	1.18	0.89	1.15	0.21	0.16	0.03	0.18
Synm	8.31	4.86	5.52	7.88	8.4	10.85	9.42	6.79	27.26	26.99	23.27	22.63	3.5	4.28	3.97	3.44	1.96	2.21	2.16	2.1	34.91	41.44	21	31.87	189.04	185.98	188.44	160.29
Lrrc28	5.14	1.97	4.34	3.85	2.48	2.5	2.67	2.17	4.67	4.68	6	4.61	3.58	3.12	3.66	4.02	39.89	39.94	43.72	37.6	4.02	3.86	3.69	3.51	7.17	7.71	7.55	6.94
Nox4	0.2	0.14	0.4	0.33	0.25	0.3	0.34	0.14	0.63	0.56	0.62	0.22	0.32	0.35	0.3	0.35	0.13	0.18	0.24	0.11	3.05	2.76	2.09	3.2	0.29	0.7	0.41	0.63
2200002D01Rik	0.73	0.1	0.83	1.27	0.26	0.68	0.49	0.04	3.87	4.01	2.44	3.42	1	1.09	0.83	0.91	0.33	0.42	0.93	0.77	0.81	0.4	0.25	0.34	1.16	0.82	0.68	0.61
Fam98c	11.11	3.31	6.56	6.39	8.74	7.77	8.58	5.45	9.87	8.81	10	8.32	9.48	9.43	9.2	8.6	49.13	50.51	54.15	53.37	8.18	8.56	7.02	9.04	6.66	5.78	5.95	6.96
Ryr1	0.02	0.01	0.03	0.05	0.08	0.11	0.13	0.05	0.02	0.03	0.06	0.01	0.01	0.01	0	0.01	0.7	0.63	0.49	0.66	0.59	0.37	0.06	0.05	0.08	0.08	0.03	0.02
Mfge8	546.48	181.6	860.38	343.96	66.69	55.88	62.57	43.07	50.79	45.46	45	47.29	2864.98	2942.04	3119.16	3181.64	18.15	21.54	22.72	21.34	23.83	24.81	341.41	19.74	43.12	36.18	41.92	35.45
Hapln3	0.46	0.18	0.43	0.21	0.11	0.04	0.1	0.07	0.47	0.2	0.17	0.37	1.48	1.85	1.54	1.68	0.13	0.12	0.13	0.25	0.14	0.09	0.28	0.02	0.13	0.3	0.3	0.11
Acan	0.17	0.03	0.11	0.03	1.46	1.42	1.7	0.9	0	0.03	0.01	0.02	0.01	0	0.01	0	0.14	0.21	0.31	0.22	0.14	0.12	0.09	0.07	0.01	0	0	0
Fah	10.19	2.84	8.61	7.41	3.53	3.31	3.42	3.28	25.62	26.78	23.93	26.74	41.09	34.14	41.12	30.79	1.82	2.07	2.2	2.2	3.84	3.73	3.84	3.57	4.6	5.43	5.29	6.63
Sh3gl3	7.81	4.14	6.45	9.02	16.79	15.41	18.82	13.79	1.16	0.73	2.33	1.56	0.63	1.05	0.27	0.22	70.36	71.82	72.64	76.48	4.83	3.42	4.09	5.59	0.78	1.06	0.53	1.05
Ddias	0.47	0.29	0.41	0.61	0.28	0.41	0.59	0.57	0.54	0.31	1.25	0.44	0.58	0.69	0.34	0.35	46.99	43.22	43.3	45.52	0.7	0.54	0.98	0.81	0.87	0.95	0.64	1.26
Ipo5	24.81	10.6	24.11	23.98	25.61	26.18	32.56	21.97	22.08	19.77	25.16	20.48	19.85	23.9	19.53	19.09	282.06	267.17	271.29	287.12	34.77	33.6	33.28	33.01	28.06	26.14	27.83	27.67
Calcb	0	0	0.06	0	0	0.13	0	0	0	0	0.07	0.14	0	0.12	0	0.07	0	0	0.06	0.06	0.06	0.06	0.11	0.06	1.96	1.59	2.71	1.8
Kif22	0.81	0.17	0.29	0.43	0.56	0.17	0.29	0.18	0.63	0.55	1.28	0.35	0.51	0.54	0.82	0.51	6.63	7.08	7.26	7.37	0.53	0.51	1.11	0.5	0.86	0.3	0.66	0.52
Fchsd2	2.52	1.04	3.34	2.88	39.24	41.87	28.34	33.07	10.64	11.86	12.17	12.53	3.03	3.91	3.49	3.04	9.03	8.59	9.28	10.49	4.46	4.73	8.65	4.45	8.5	9.11	8.14	7.96
Klk10	0.04	0	0	0	0.05	0	0.28	0.08	0.05	0	0.09	0.14	0	0.08	0	0	0	0	0	0	0	0.04	0.04	0	0.09	0.53	0.18	0.27
Plekhb1	3.8	2.38	4.55	3.38	1.68	1.83	0.83	0.91	39.41	41.95	36.03	35.88	7.04	7.22	5.77	6.65	0.64	0.77	0.74	0.85	1.86	2.31	1.27	1.44	4.14	5.11	3.31	4.06
Coro1a	1.97	0.83	1.69	1.25	5.89	3.79	5.74	2.78	5.52	5.3	5.64	5.18	2.44	2.98	3.11	2.5	0.34	0.41	0.25	0.71	7.48	6.57	31.09	5.64	6.69	3.82	4.51	3.83
Dnajb13	0.14	0.09	0.31	0.3	0.25	0.36	0.56	0.15	7.54	8.49	9.82	6.93	0.81	0.93	0.75	0.49	63.4	65.76	70.25	57.86	0.55	0.59	0.67	0.56	0.05	0.1	0.07	0.23
Sgf29	7.06	3.72	8.01	6.01	17.84	14.33	18.61	10.73	10.21	10.23	11.56	9.18	9.44	7.62	7.86	7.28	98.02	102.91	99.78	85.57	12.08	11.52	8.1	11.53	14.5	11.85	13.1	12.25
Nfatc2ip	1.68	0.74	1.7	1.02	2.49	1.36	1.86	1.12	1.78	1.39	2.68	2.02	2.31	2.83	2.32	2.02	21.03	22.75	25.97	23.96	2.06	1.73	1.7	1.64	3.17	2.93	2.86	3.12
Pgm2l1	1.86	0.86	2.41	1.89	0.52	0.6	0.56	0.29	2.03	2.37	2.55	2.17	13.56	12.92	13.71	10.14	3.97	3.36	3.64	3.96	0.64	0.53	1.38	0.73	1.88	2.19	2.02	2.5
Atp2a1	0.38	0.15	0.27	0.5	0.02	0.13	0.1	0.05	0.73	0.68	0.85	0.58	0.12	0.18	0.25	0.15	0.27	0.25	0.23	0.22	4.1	3.69	0.08	0.08	0.14	0.21	0.16	0.3
Chrdl2	4.72	3.08	3.25	3.36	4.25	7.26	5.62	3.07	3.68	3.59	4.5	3.71	0.13	0.18	0.22	0.52	0.15	0.12	0.1	0.14	30.95	27.91	15.38	28.42	1.27	0.74	1	0.93
Lat	0.75	0.04	1.3	0.47	0.31	0.3	0.62	0.24	0.77	0.71	0.97	0.57	8.08	7.51	10.46	5.91	0.13	0.1	0.11	0.14	0.6	0.17	1.21	0.63	0.52	0.55	0.42	0.44
Dgat2	7.58	1.82	5.29	3.46	33.34	28.85	35.03	18.63	42.43	43.23	37.7	33.48	7.18	7.25	5.29	6.99	82.35	90.55	97.06	83.45	16.57	11.76	9.31	12.01	8.66	10.94	5.84	4.18
Il4ra	18.97	4.82	13.81	11.24	6.07	5.41	5.56	3.18	10.34	9.72	10.71	10.37	45.83	41.62	47.42	39.89	1.66	1.04	1.16	1.46	4.79	4.58	11.75	3.78	9.66	9.4	10.91	9.73
Nsmce1	12.4	3.95	10	9.51	9.01	8.42	9.79	6.95	16.3	16.41	17.25	14.77	14.93	15.41	16.4	14.51	65.91	70.15	78.03	65.29	11.56	10.35	9.07	11.1	18.89	15.54	15.35	14.88
Acer3	1.37	0.56	1.83	1.64	0.97	1.38	1.34	1.53	2.36	1.88	2.49	2.66	1.91	2.21	1.96	2.11	1.5	1.27	1.58	1.61	1.34	1.52	3.34	1.45	16.62	18.04	14.88	16.93
Slc5a11	0	0	0.05	0	0	0	0	0	0.11	0.28	0.32	0.16	0	0	0	0	0	0	0	0	0.02	0	0.04	0	0.05	0.06	0	0
Micalcl	0.17	0.06	0.1	0.21	0.08	0.05	0.07	0.14	0.06	0.03	0.19	0.11	0.2	0.5	0.33	0.13	1.27	1.02	1.2	1.26	0	0.17	0.02	0.02	0.08	0.17	0.41	0.56
Dkk3	2.86	0.82	2.35	3.17	3.68	3.33	3.76	2.43	26.87	26.47	28.95	27.02	3.71	4.08	5.41	3.71	0.1	0.12	0.15	0.28	6.79	6.03	10.49	7	4.71	4.81	4.18	4.9
Tgfb1i1	8.49	4.17	10.73	7.94	4.7	4.6	4.53	2.42	8.97	10.3	7.68	8.23	4.89	5.17	7.3	6.71	0.89	0.8	0.85	0.72	13.49	15.37	12.55	12.67	62.44	61.86	66.64	60.46
Cox6a2	0	0	0	0	0	0	0	0	0	0.1	0.09	0.1	0	0	0.36	0	0	0.23	0	0.09	1.04	0.34	0.31	0	0	0	0	0
Lyve1	0.9	0.32	1.38	1.53	2.67	2.57	4.84	2.84	12.5	13.62	13.31	17.47	1.23	1.03	1.12	1.35	0.02	0	0.06	0.18	3.96	3.89	3.56	4.71	4.02	4.75	3.99	5.09
Dkkl1	4.49	2.46	3.99	3.85	8.9	7.12	9.69	5.77	4.4	2.13	19.82	2.21	32.82	36.3	23.26	38.02	637.41	743.02	764.58	684.61	9.16	8.1	11.05	12.14	15.08	17.53	18.52	12.29
Kat8	11.17	4.59	6.91	9.43	10.55	10.05	10.03	8.18	10.26	10.72	12.36	10.93	8.33	8.07	8.93	7.53	49.76	47.23	48.42	47.92	10.03	10.79	9.48	11.25	10.66	9.5	10.89	9.94
Phkg2	22.96	8.43	17.98	18.66	18.91	20.35	21.27	14.4	26.31	24.3	37.62	22.95	18.02	19.25	16.8	18.99	549.2	494.6	544.6	510.92	34.49	31.06	26.72	35.52	15.68	13.25	15.14	18.48
Ush1c	0.19	0.02	0.02	0.04	0.17	0.33	0.36	0.23	41.55	43.15	39.98	39.51	1.91	1.79	2.24	0.88	0.82	0.68	0.94	1.33	0.02	0.04	0.03	0.04	0.14	0.04	0.02	0
Rgs10	1.42	0.95	1.91	0.87	3.43	3.83	4.22	3.14	4.04	3.31	3.93	3.7	2.7	3.05	2.84	1.65	18.72	19.5	17.08	22.57	3.56	3.99	17.31	3.56	1.93	1.44	2.19	1.79
Ldhc	2.86	1.73	2.84	3	4.88	9.94	9.62	5.52	7.09	2.75	31.47	3.66	5.67	11.34	4.01	4.11	1707.58	1724.41	1768.6	1847.89	10.14	12.78	8.88	13.74	0.64	0.29	0.32	1.81
Tacc2	11.77	5.88	9.05	7.29	1.9	2.69	2.92	1.56	58.76	57.21	53.28	50.04	8.11	7.84	9.92	8.51	1.53	1.51	1.33	1.76	5.71	5.64	4.32	4.94	29.79	36.67	36.4	33.95
1700007K09Rik	2.71	0.45	0.26	1.04	8.13	14.69	13.19	10.96	0.4	0.68	2.07	0.19	1.65	0.92	1.08	1.49	58.73	67.26	88.89	51.12	11.74	15.07	10.5	15.24	0.74	0.78	0.27	0.33
Plk1	1.16	0.38	0.53	0.79	0.82	0.88	0.4	0.55	1.93	1.5	2.82	1.69	1.11	1.38	1.61	0.6	35.06	36.99	38.8	37.21	1.24	1.17	1.49	1.1	1.14	0.55	1.24	0.92
Scnn1b	0.32	0.06	0.13	0.05	0.05	0.24	0.56	0.23	4.54	4.21	5.06	4.45	0.76	0.66	0.94	0.61	0.13	0.14	0.11	0.25	0.84	0.36	0.27	0.67	1.65	1.31	0.96	1.16
Mfsd13b	0.03	0	0.18	0.1	0.68	0.9	0.88	0.44	0.44	0.32	2.38	0.66	0.26	0.18	0.16	0.27	52.88	58.21	72.09	57.14	1	1.34	0.9	1.13	1.9	1.42	2.01	2.39
Dnhd1	0.83	0.35	0.67	0.6	0.76	0.53	0.84	0.47	1.42	1.16	1.57	1.32	0.47	0.59	0.49	0.49	28.94	24.11	24.19	31.49	0.56	0.54	0.46	0.57	1.2	1.09	0.98	1.05
Pdzd9	0.27	0.31	0.83	0.77	0.32	1.03	0.53	0.56	0.69	0.49	1.61	0.3	0.48	1.05	0.36	0.32	62.6	62.24	56.53	62.81	0.46	0.64	0.19	0.69	0.2	0.09	0.17	0.14
Cckbr	0.05	0	0.16	0.05	0	0	0	0	6.91	6.6	7.51	5.31	0.73	0.4	0.36	0.27	0.17	0.1	0.06	0.21	0	0	0.02	0	0	0	0	0
Crym	0.15	0.06	0.06	0.05	0.31	0.26	0.33	0.27	1.76	2.19	2.03	2.28	0.05	0.13	0.2	0.14	0.1	0	0.06	0.02	0.15	0.11	0.28	0.25	0.47	0.5	0.49	0.56
Anks4b	0.73	0.31	0.4	0.48	4.25	2.69	3.15	2.34	14.97	16.51	15.4	15.11	0.74	0.73	0.75	0.57	0.88	0.71	0.34	0.64	0.44	0.33	0.18	0.53	0.1	0.05	0.03	0.1
Lyrm1	0.82	0.86	1.09	1.26	0.51	0.85	0.75	0.63	1.26	1.52	1.52	1.36	0.63	0.76	0.6	0.54	7.76	7.01	7.21	8	0.57	0.72	0.74	0.64	1.4	1.4	1.4	1.46
Rexo5	3.33	1.19	2.7	3.37	1.75	1.68	2.69	1.91	3.51	3.42	5.31	4.13	1.26	2.57	2.67	1.67	62.71	63.45	66.58	70.39	3.25	3.64	5.2	4.18	5.72	5.17	3.93	4.04
Acsm2	0	0	0	0	0.2	0.37	0.11	0.17	0.07	0.07	0.1	0.11	0	0	0	0	0	0	0	0	0	0	0.01	0	0	0	0	0
Gp2	0.06	0	0	0	0	0	0	0	0.1	0.13	0.16	0.29	0.04	0.03	0.06	0	0.08	0.08	0.03	0.06	0	0	0	0.06	0	0	0	0
Umod	0.05	0	0	0	0	0	0	0	5.18	3.3	2.49	4.99	0.93	0.46	0.91	0.34	0.17	0.02	0	0.14	0	0	0	0	0	0	0	0
Acsm5	0.16	0.03	0.04	0.06	0	0.08	0.07	0.07	2.57	3.02	3.07	2.75	0.02	0.1	0.16	0.08	0.26	0.27	0.22	0.44	0.02	0.04	0.02	0.04	0.17	0.29	0.4	0.03
D7Ertd443e	0.1	0.16	0.02	0.04	0.18	0.37	0.32	0.49	0.28	0.07	1.94	0.13	0.17	0.26	0.13	0.11	36.42	35.23	38.37	31.14	0.39	0.46	0.09	0.42	0.19	0.48	0.19	0.26
BC051019	0.27	0.27	0.3	0.2	0.23	0.19	0.2	0.11	22.6	17.94	19.81	17.04	0.39	1.31	1.5	0.68	0.11	0.05	0	0.18	0.18	0.27	0	0.31	0.19	0.27	0.25	0.19
Trim66	0.24	0.12	0.14	0.13	0.1	0.07	0.12	0.09	1.2	0.96	0.92	0.94	0.13	0.15	0.14	0.16	7.03	6.72	8.06	7.09	0.12	0.1	0.15	0.14	0.2	0.25	0.32	0.37
Stk33	0.67	0.51	0.46	0.61	1.2	1.74	1.7	1.42	12.74	11.6	14.65	10.56	1.54	2.44	1.24	1.18	122.73	123.48	117.11	118.41	1.74	1.87	1.32	1.86	0.63	0.28	0.51	0.65
Tub	0.03	0.03	0.01	0.01	0.05	0.05	0.1	0.05	0.29	0.28	0.41	0.15	0.12	0.01	0.01	0.05	4.24	4.39	4.29	4.89	0.08	0.05	0.12	0.05	0.06	0.1	0.13	0.08
Mrgprf	1.14	0.48	1.64	1.08	1.29	1.17	2.31	1.32	3.31	2.95	2.39	2.87	0.94	0.74	1.37	1.27	0.08	0.05	0.1	0.23	1.87	1.91	2.2	2.15	7.55	7.13	8.21	8.13
Fgf15	0	0.08	0	0.04	0	0	0	0	0	0	0	0	0	0	0	0	0	0.06	0.03	0	1.54	1.04	0.7	1.05	0	0.04	0.07	0.17
Gm498	0.81	0.6	0.46	1.12	1.32	1.91	1.34	1.63	0.29	0.21	1.79	0.34	0.41	0.69	0.1	0.2	62.44	59.69	59.65	56.75	4.52	3.3	2.67	3.6	0.17	0	0.16	0.59
Tnni2	0.53	0.51	0.39	0.14	0.36	0.7	0.43	0.19	0.53	0.52	0.43	0.73	0.39	0.26	0.14	0.21	0	0.17	0.06	0.07	1.65	1.31	1.77	0.44	0.21	0.37	0.07	0.34
Syt8	0.39	0.2	0.15	0.09	1.28	1.25	1.11	0.96	0.09	0.18	0.21	0.17	0.09	0.23	0.12	0.13	0	0	0	0.08	1.97	1.56	1.13	1.6	0.5	0.62	0.74	0.7
Smarca1	3.02	2.16	4.48	3.94	24.62	41.54	34.1	37.62	5.12	3.91	5.25	5.4	0.95	2.43	1.44	3.25	3.18	2.72	3.14	3.52	111.56	111.24	83.99	126.88	2.63	3.92	3.89	4.79
Sash3	0.86	0.14	0.35	0.43	5.02	6.16	4.63	3.2	0.82	0.86	1.22	1.07	0.84	0.94	0.62	0.26	0.33	0.42	0.37	0.11	1.63	1.09	10.17	1.4	1.69	1.54	1.48	1.49
Igsf1	0.08	0.07	0.01	0	0.04	0.03	0.04	0.04	0.53	0.57	0.75	0.6	0.14	0.09	0.07	0.06	0	0	0.01	0.03	0.03	0.01	0	0.05	0.1	0.15	0.08	0.17
Gpc4	137.98	43.36	97.21	115.53	4.66	4.52	5.53	3.52	87.04	92.5	84.36	86.04	31.01	35.8	33.38	40.4	8.56	8.37	10.19	9.68	8.54	8.42	7.92	7.12	9.97	10.14	10.16	8.92
3830403N18Rik	0	0.07	0.11	0.25	0	0	0.22	0.11	0	0	0.19	0	0.14	0	0.24	0.12	2.99	3.41	3.68	3.01	0	0.11	0.21	0.11	0.06	0	0.06	0
Fgf13	0.36	0.09	0.37	0.51	0.62	0.5	0.53	0.51	5.12	4.66	5.07	7.14	0.98	0.71	0.85	1.06	0.33	0.41	0.46	0.33	1.32	1.52	1.14	1.39	1.48	1.07	0.92	1.17
Hdac6	56.27	13.45	26.3	34.5	233.74	236.51	266.06	152.03	23.33	22.54	23.69	21.69	5.63	5.97	6.26	6.06	14.88	15.2	14.62	15.6	170.54	161.29	99.31	149.25	70.78	59.6	60.6	53.72
Glod5	0.18	0	0	0	0.57	0.46	0.99	0.49	1.83	2.95	1.9	3.29	0.1	0.17	0	0.09	0.08	0.15	0.08	0	0	0.09	0.24	0.25	0	0	0	0.11
Was	2.92	1.34	1.95	2.58	1	1.18	1.05	0.44	1	1	0.94	0.74	13.17	10.46	15.04	9.96	0.1	0.07	0.08	0.08	1.12	1.11	6.85	0.95	1.19	1.55	0.88	1.17
Slc38a5	2590.51	807.12	2253.23	2235.67	7.88	3.97	5.44	2.34	11.38	6.8	7.1	7.36	207.81	362.55	267.97	959.34	6.99	7.83	7.19	7.87	3.34	3.54	5.23	4.21	4.21	2.86	5.23	3.26
Pgr15l	0.15	0.07	0.19	0.21	0	0.02	0	0	0	0	0	0	0.03	0.05	0	0.04	0.02	0.03	0.02	0.02	0	0	0	0	0	0	0.01	0
Magee2	1.2	0.26	0.5	0.53	0.14	0.08	0	0.14	0.15	0.09	0.03	0.08	0.03	0.1	0.05	0.08	0	0	0	0	0	0	0.09	0	0.03	0.03	0.03	0
Fgf16	0	0	0	0.04	0.04	0	0	0.03	0.04	0.04	0.08	0.16	0	0	0	0.12	0	0	0	0	0.22	0.32	0.16	0.03	0	0.04	0.11	0.05
Pgk2	3.77	0.86	3.86	3.71	9.33	11.14	11.23	8.92	2.23	0.96	7.64	1.84	1.85	3.09	0.88	1.63	388.41	403.84	437.68	415.83	25.37	23.69	18.04	25.37	3.08	0.38	0.55	5.42
Tnmd	0.13	0.06	0.86	0.33	0.24	1.29	1.56	0.94	1.26	0.98	1.09	0.77	0.1	0.46	0.23	0.23	0	0	0	0	0.22	0.3	0.63	0.17	0.05	0.2	0.32	0
Xkrx	19.92	9.5	15.32	21.37	3.35	3.19	4.58	2.44	0.52	0.44	0.65	0.79	0.05	0.28	0.19	0.13	0.11	0.09	0.11	0.06	5.98	3.91	4.34	5.8	0.28	0.37	0.24	0.42
Cenpi	0.27	0.07	0.32	0.41	0.25	0.06	0.1	0.1	0.29	0.24	0.56	0.28	0.25	0.35	0.26	0.29	4.25	4.13	5.45	4.41	0.29	0.34	0.69	0.56	0.7	0.16	0.39	0.43
Serpina7	0.08	0	0.02	0.06	1.02	1.02	0.86	0.92	0	0	0	0	0.12	0.17	0	0	0.44	0.4	0.44	0.25	0.2	0.18	0.23	0.24	0.08	0.03	0	0
Col4a6	7.38	2.25	7.67	5.14	5.05	4.72	5.92	3.38	4.2	4.49	4.77	4.01	3.05	3.17	4.71	3.49	0.76	0.76	0.78	0.9	7.49	7.81	6.91	7.37	31.28	32.01	32.69	26.62
Col4a5	8.45	2.74	9.71	5.71	6.41	5.81	8.73	4.55	8.63	9.18	10.09	8.12	4.72	4.62	7.48	4.38	1.46	1.24	1.56	1.69	9.15	8.93	12.04	8.8	31.3	31.33	36.5	23.85
Adgrg2	195.53	97.26	290.52	178.77	2.96	3.04	3.38	2.46	311.35	290.44	343.88	329.02	690.75	787.69	696.16	707.46	0.43	0.38	0.24	0.29	4.75	5.44	6.31	5.78	5.21	4.35	4.27	4.42
Flna	131.77	39.02	104.04	88.29	133.38	129.42	134.56	75.65	132.75	127.66	125.78	126.57	62.38	61.5	82.38	72.24	10.76	11.29	11.88	14.26	363.09	384.9	307.18	333.77	975.83	879.57	1018.08	819.99
Zcchc13	0.38	0.21	0.21	0.35	0.59	0.23	0.36	0.05	0.13	0.43	0.94	0.06	0.52	0.47	0.34	0.06	29.62	30.97	33.22	27.24	1.47	0.7	0.54	0.77	0.41	0	0	0.42
Grpr	0.96	0.48	0.6	0.64	0	0	0	0	0	0.03	0.08	0	0.03	0.02	0.02	0	0	0	0	0	0	0	0.02	0.02	0	0	0	0.03
Ap1s2	525.29	409.32	1160.02	1268.69	3.56	3.81	3.53	2.61	73.07	58.88	77.91	73.99	305.96	414.86	331.72	494.68	4.54	3.25	3.88	4.14	2.57	2.42	8.86	3.36	3.3	2.77	2.83	3.26
Trex2	0.88	0.15	0.68	0.32	0	0	0	0	0.07	0	0	0	1.31	2.14	1.14	1.93	0.16	0	0	0	0.12	0	0.26	0.11	0.43	0	0.12	0.07
Zfp92	0.01	0.01	0	0	0.01	0	0	0	1.72	1.46	1.71	1.68	0.11	0.05	0.06	0.08	0.06	0.03	0.06	0.04	0.02	0	0.01	0.02	0.02	0	0.02	0
Atp2b3	62.63	19.69	32.61	50.57	173.01	173.08	198.05	131.08	0.38	0.2	0.3	0.14	2.22	2.88	2.74	1.62	1.13	1.08	1.2	0.97	101.12	96.26	60.82	90.67	9.6	6.52	8.08	7.32
Asb11	51.91	17.25	44.47	67.82	100.04	77.93	91.07	70.49	8.33	7.87	9.19	6.52	0.41	1.18	0.72	1.64	0.13	0.36	0.42	0.66	54.77	48.32	36.1	48.56	0.59	0.55	0.48	0.44
Dusp9	0.02	0	0.02	0.07	0	0.07	0.02	0	0.05	0.1	0.12	0.07	0	0.02	0.04	0	0.74	0.83	0.54	0.76	0	0	0.16	0.04	0.02	0.02	0.02	0.03
Asb9	0.21	0	0.05	0.11	0.68	0.66	0.78	0.68	0.48	0.81	1.46	1.49	0.18	0.5	0.21	0.06	49.05	43.3	39.68	43.91	0.31	0.36	0.33	0.39	0	0.12	0	0.2
Plxnb3	0.07	0	0.02	0.02	0.71	0.54	0.78	0.41	2.74	2.97	2.68	2.72	0.15	0.16	0.15	0.13	0.02	0.04	0.04	0.04	0.19	0.16	0.44	0.2	0.42	0.58	0.68	0.43
L1cam	0.61	0.19	0.55	0.34	1.57	1.35	1.04	0.66	0.31	0.45	0.42	0.58	0.31	0.21	0.26	0.38	0.03	0.02	0.06	0.02	6.62	4.83	3.48	4.69	3.44	3.44	3.05	2.18
Opn1mw	1.54	0.37	0.71	0.83	6.52	5.72	4.63	3.27	0	0	0	0	0.06	0.05	0	0.21	0	0	0	0.05	3.12	1.76	1.07	2.27	0.15	0.22	0	0.12
Plxna3	9.79	1.97	4.57	4.66	10.01	8.72	12.18	6.23	3.32	3.43	3.21	3	0.75	0.61	0.83	0.84	0.37	0.31	0.34	0.29	4.11	3.28	3.13	3.43	2.54	2.79	3.14	2.24
Nxf7	0.03	0	0.13	0.09	0	0	0	0	0	0.03	0.03	0.03	0	0.05	0	0	0.46	0.53	0.39	0.53	1.77	1.76	1.04	1.53	8.69	7.98	8.78	5.08
Vsig1	1.84	1.32	2.14	2.99	4.63	5.35	5.52	3.94	0.05	0	0.59	0.05	0.78	1.67	0.79	1.73	33.06	32.66	29.17	30.92	3.34	3.63	3.18	3.58	0.3	0.12	0.11	0.14
Proz	0.05	0	0.02	0.02	0	0	0	0	8.93	8.64	10.07	7.92	0.46	0.26	0.54	0.36	0.11	0.15	0.11	0.23	0	0	0.05	0	0.02	0	0	0
Adprhl1	0.07	0	0	0	0.02	0.04	0.01	0	0.03	0.01	0.01	0.02	0.01	0.01	0.01	0	0.03	0.07	0.05	0.01	0.1	0.06	0	0	1.26	0.89	0.85	0.76
1700029H14Rik	1.98	1.57	2.56	3.37	4.34	5.06	5.19	3.92	0.87	1.36	6.27	1.06	0.94	2.11	0.87	1.3	200.3	212.99	180.57	189.61	9.57	8.03	6.65	10.03	0.76	0.14	0.18	1.07
Myom2	4.3	1.44	1.68	3.58	42.1	44.86	39.95	27.01	0.34	0.23	0.25	0.21	0.03	0.02	0.01	0.01	0.57	0.59	0.62	0.77	0.83	0.4	0.41	0.34	0.04	0.05	0.02	0.01
Angpt2	0.33	0.21	0.37	0.41	2.11	2.61	2.41	2.05	0.83	1.26	1.2	1.15	0.39	0.53	0.55	0.34	0.57	0.58	0.61	0.63	0.28	0.23	1.32	0.13	0.56	0.86	0.49	0.86
Slc25a15	3.43	0.77	1.97	1.97	2.22	1.72	2.19	1.42	30.93	26.34	33.71	29.63	3.33	3.6	4.09	3.38	0.22	0.2	0.25	0.21	1.87	2.25	2.22	2.11	3.54	3.57	4.02	2.85
Adrb3	0.02	0.03	0.06	0.02	0.14	0.67	1.53	0.2	8.19	13.51	7.71	13.07	0.28	0.06	0.11	0.09	0.02	0	0.04	0	0.23	0.06	0.02	0.04	1.28	1.12	0.89	0.3
Ggn	2.04	0.66	1.33	1.84	1.26	1.79	1.69	0.98	1.78	1.25	5.14	1.37	0.76	1.42	1.08	1.26	132.22	118.6	108.05	113.82	3.37	2.78	1.38	2.45	0.76	0.6	0.51	1.3
Col4a1	18.86	8.12	26.54	16.4	12.4	14.44	18.82	7.52	43.9	45.15	42.39	46.05	19.56	18.37	37.58	23	3.21	3.53	4.99	4.72	25.12	26.48	51.02	23.48	109.14	98.24	120.16	70.12
Tex29	4.89	1.16	2.58	1.81	0.84	1.76	1.02	0.48	5.48	7.66	6.31	5.71	1.67	2.04	1.92	2.95	82.17	81.24	88.97	69.24	1.86	1.9	2.64	1.7	1.97	1.52	1.28	0.89
Gpm6a	0.74	0.19	1.21	0.78	1.9	1.9	3.2	2.04	6.8	6.6	6.37	6.91	0.65	0.64	1.1	0.77	0.37	0.21	0.37	0.33	1.54	1.84	2.73	2.04	18.94	21.14	18.37	22.16
Spata4	0.62	0.51	0.82	1.52	1.34	3.01	2.41	2.82	0.97	0.75	7.87	0.8	2.52	3.95	1.15	1.91	607.71	644.09	636.24	625.69	3.97	5.76	3.45	6.15	0.71	0	0.06	0.78
Dkk4	0	0	0.04	0	0	0	0	0	0	0	0	0	0.05	0.26	1.16	0.34	0.08	0	0.04	0	0	0	0	0	0	0	0	0
Plat	4.36	2.34	4.32	4.79	3.67	3.51	3.38	2.28	43.3	42.1	55.93	51.33	5.64	5.56	6.46	6.23	2.62	2.53	2.17	3.32	4.68	3.36	4.49	2.91	2.92	2.85	3.1	3.03
Ank1	0.41	0.11	0.15	0.14	0.22	0.3	0.29	0.09	0.69	0.91	0.61	0.68	0.28	0.3	0.17	0.29	0.31	0.24	0.2	0.32	7.01	8.51	5.61	7.4	39.35	38.71	42.72	31.63
Ido1	299.89	248.37	309.48	426.12	9.71	10.45	14.14	8.94	0.41	0.56	0.7	0.04	22.39	37.89	21.12	45.89	0.13	0.12	0.13	0.11	52.38	54.64	31.65	51.49	4.36	4.19	3.56	6.3
Adam18	0.25	0.16	0.39	0.35	0.14	0.4	0.54	0.19	0.12	0.08	0.81	0.17	0.33	0.41	0.08	0.05	54.56	51.52	53.97	58.84	0.3	0.4	0.38	0.66	0.29	0	0	0.16
Adam3	1	0.61	0.68	1.47	1.17	2.69	2.46	1.69	1.62	0.99	7.93	1.04	1.61	3.42	0.76	1.13	390.11	369.44	368.71	401.26	2.97	3.03	1.97	3.51	0.21	0.12	0.02	0.38
Adam5	1.04	1.37	1.35	1.84	1.22	2.93	2.82	2.95	2.3	1.42	6.58	1.54	2.53	4.03	1.47	1.72	417.72	412.1	395.75	431.83	3.43	2.83	2.39	4.11	0.58	0.26	0.44	1.08
Star	0.31	0.28	0.57	0.54	0.87	0.99	1.04	0.44	1.17	1.21	0.95	0.97	0.64	0.55	0.47	0.36	7.96	8.87	6.55	9.16	0.69	0.96	0.5	0.75	1.77	1.93	1.75	1.56
Kcnu1	0.49	0.22	0.31	0.74	0.33	0.46	0.63	0.59	0.46	0.24	1.19	0.37	0.2	0.29	0.07	0.36	33.99	37.73	43.86	34.02	0.65	0.93	0.6	0.98	0.96	0.91	0.67	1.08
Gtf2e2	7.99	5.59	9.98	10.64	6.38	8.33	9.85	7.9	8.34	6.36	8.07	8.06	7.95	9.34	7.26	8.28	68.79	67.78	68.43	66.83	8.42	7.95	9.5	8.35	11.47	13.23	11.15	11.64
Pdgfrl	5.91	2.43	5.11	5.46	0.81	1	1.93	0.88	2.35	2.52	2.88	2.01	0.61	0.77	1.27	0.61	0.5	0.37	0.42	0.34	1.31	1.39	5.14	1.03	1.06	0.9	0.84	0.98
Sap30	0.86	0.65	1.38	0.49	1.2	1.17	1.6	0.7	1.39	1.96	2.06	1.93	1.48	1.07	1.45	1.34	9.08	9.57	9.11	9.64	1.41	1.19	4.31	1.14	1.6	1.87	1	2.36
Hpgd	10.19	6.75	17.42	17.15	43.74	50.61	54.51	53.85	36.97	39.56	45.42	41.63	6.48	7.98	9.97	8.11	4.9	5.02	6.54	4.71	101.56	113.28	89.02	105.45	567.72	574.33	589.15	639.64
Iqcm	0.15	0.3	0.48	0.38	6.1	7.12	6.86	9.58	0.1	0.06	1.48	0.1	0.17	0.22	0.36	0.34	45.34	45.18	53.65	40.58	0.84	1.06	0.99	1.35	0.03	0.13	0.06	0.37
Cenpu	0.34	0.63	0.87	0.51	0.79	0.62	0.57	0.44	0.98	0.92	1.3	1.36	0.7	1.27	0.79	0.48	19.27	17.42	17.8	17.66	0.73	0.58	0.95	0.73	0.86	0.73	0.85	0.92
Cfap97	4.74	3.65	7.19	7.96	3.7	4.76	5.51	4.82	6.36	5.64	7.49	6.68	7.47	8.85	6.91	7.05	109.03	101.57	92.49	118.22	4.93	4.78	4.22	4.83	5.21	4.32	4	4.67
Pdlim3	3.93	1.88	4.89	4.5	5.56	5.54	6.18	4.37	5.93	5.96	6.33	7.58	1.94	2.31	2.85	2.4	1.25	1.03	1.43	1.25	25.24	36.41	27.36	29.65	60.98	66.91	69.23	62.35
Lrp2bp	0.28	0.22	0.41	0.28	0.41	0.42	0.49	0.37	2.82	2.47	2.92	3.05	0.29	0.42	0.25	0.22	29.04	29.63	30.42	26.16	0.43	0.43	0.28	0.43	0.22	0.45	0.31	0.26
F11	0.05	0.03	0.13	0	0	0.03	0.1	0.05	1.31	1.27	1.17	1.86	0.06	0.08	0.08	0.03	2	2.33	2.75	2.74	0.08	0.03	0.02	0.1	0	0.03	0	0
Sall1	0.18	0.06	0.01	0	0	0	0.01	0	29.39	31.05	28.03	30.91	0.94	1.16	1.02	0.55	0.21	0.2	0.28	0.18	0.01	0.08	0.01	0.04	0	0	0.01	0
1700011L22Rik	0.37	0.16	0.36	0.27	0.4	0.65	0.57	0.34	0.21	0.27	2.19	0.14	0.44	0.71	0.32	0.2	95.09	95.69	105.52	86.78	0.74	0.91	0.22	0.46	0.13	0.14	0.32	0.16
Hp	1.1	0.51	2.2	0.48	6.21	9.94	27.95	6.08	148.63	160.64	120.91	143.69	2.44	1.19	2.9	1.36	0.04	0.34	0.04	0.18	4.88	3.18	3.38	0.92	16.85	16.86	10.2	2.51
Txnl4b	4.24	2.66	4.7	4.41	4.18	4	4.19	3.8	4.41	5.35	5.62	4.62	4.59	5.71	4.04	4.52	32.59	29.21	30.4	30.15	4.32	4.09	3.64	3.82	4.98	4.48	5.52	6.79
Ces1f	5.46	1.86	5.09	5.2	0.77	1.85	1.29	0.89	2.13	2.88	2.82	3.01	0.44	0.53	0.89	0.3	0	0.03	0	0	0.4	0.15	0.19	0.32	1.56	2.56	1.26	0.43
Pmfbp1	0.58	0.73	0.56	0.91	0.67	1.43	1.6	1.1	0.59	0.54	4.13	0.26	0.71	1.19	0.27	0.82	114.88	128.4	101.44	118.66	1.58	1.7	1.41	1.93	0.18	0	0.05	0.26
Irx5	0	0	0	0	0	0.02	0.07	0	0.29	0.39	0.45	0.46	0.05	0.07	0.07	0.02	2.87	3.52	3.82	2.69	0.02	0	0	0.02	0.12	0.03	0.05	0.18
St3gal2	22.36	5.69	35.62	15.5	2.16	2.06	2.64	1.39	12.41	12.05	11.53	11.23	210.97	209.46	236.37	184.05	1.97	1.98	1.82	2.37	3.86	3.82	5.56	2.52	10.04	9.48	9.7	8.01
Il34	4.4	1.23	2.78	2.36	0.5	0.7	0.8	0.37	80.24	75.83	77.37	71.13	30.7	27.9	31.94	20.98	0.46	0.48	0.21	0.3	0.82	0.78	1.24	0.47	1.85	1.49	1.76	1.55
[truncated: 2,823 more rows]
