# Supplementary material for: Anatomical Transcriptome Atlas of the Male Mouse Reproductive System During Aging
Source: Front Cell Dev Biol. 2022 Feb 8;9:782824. doi: 10.3389/fcell.2021.782824 (PMC8861499; doi:10.3389/fcell.2021.782824)
Supplement: Supplementary file 3 [file Table9.XLSX]

## Sheet: Upregulated
Groups	Intersection number of genes	Intersection genes
Ca	337	ENSMUSG00000005883,ENSMUSG00000039221,ENSMUSG00000030877,ENSMUSG00000078800,ENSMUSG00000005779,ENSMUSG00000040158,ENSMUSG00000078776,ENSMUSG00000029780,ENSMUSG00000030774,ENSMUSG00000030792,ENSMUSG00000078670,ENSMUSG00000078606,ENSMUSG00000029650,ENSMUSG00000054659,ENSMUSG00000029535,ENSMUSG00000030510,ENSMUSG00000050035,ENSMUSG00000050043,ENSMUSG00000025040,ENSMUSG00000025044,ENSMUSG00000025081,…
Ca,Cd	17	ENSMUSG00000029322,ENSMUSG00000030237,ENSMUSG00000024774,ENSMUSG00000073573,ENSMUSG00000090963,ENSMUSG00000016194,ENSMUSG00000055730,ENSMUSG00000098905,ENSMUSG00000050103,ENSMUSG00000074521,ENSMUSG00000032839,ENSMUSG00000026824,ENSMUSG00000051839,ENSMUSG00000028528,ENSMUSG00000057346,ENSMUSG00000027820,ENSMUSG00000027719
Ca,Cd,Dd	9	ENSMUSG00000078889,ENSMUSG00000048330,ENSMUSG00000075225,ENSMUSG00000039717,ENSMUSG00000074653,ENSMUSG00000037053,ENSMUSG00000027359,ENSMUSG00000066097,ENSMUSG00000033427
Ca,Cd,Te	1	ENSMUSG00000059003
Ca,Cd,Te,Dd	0
Ca,Co	22	ENSMUSG00000064016,ENSMUSG00000019368,ENSMUSG00000034918,ENSMUSG00000029273,ENSMUSG00000034006,ENSMUSG00000038630,ENSMUSG00000006204,ENSMUSG00000021822,ENSMUSG00000031775,ENSMUSG00000055471,ENSMUSG00000035509,ENSMUSG00000021439,ENSMUSG00000025892,ENSMUSG00000074673,ENSMUSG00000042256,ENSMUSG00000042250,ENSMUSG00000036912,ENSMUSG00000022755,ENSMUSG00000110344,ENSMUSG00000028088,ENSMUSG00000027801,…
Ca,Co,Cd	6	ENSMUSG00000030757,ENSMUSG00000005947,ENSMUSG00000020953,ENSMUSG00000021640,ENSMUSG00000028804,ENSMUSG00000004668
Ca,Co,Cd,Dd	4	ENSMUSG00000016346,ENSMUSG00000017453,ENSMUSG00000046031,ENSMUSG00000028544
Ca,Co,Cd,Te	0
Ca,Co,Cd,Te,Dd	0
Ca,Co,Dd	5	ENSMUSG00000034156,ENSMUSG00000045382,ENSMUSG00000001348,ENSMUSG00000027219,ENSMUSG00000033249
Ca,Co,Ed	9	ENSMUSG00000054672,ENSMUSG00000034987,ENSMUSG00000030428,ENSMUSG00000020098,ENSMUSG00000006378,ENSMUSG00000069919,ENSMUSG00000069917,ENSMUSG00000052305,ENSMUSG00000026809
Ca,Co,Ed,Cd	0
Ca,Co,Ed,Cd,Dd	1	ENSMUSG00000015314
Ca,Co,Ed,Cd,Te	0
Ca,Co,Ed,Cd,Te,Dd	0
Ca,Co,Ed,Dd	4	ENSMUSG00000030830,ENSMUSG00000074489,ENSMUSG00000012889,ENSMUSG00000032093
Ca,Co,Ed,Is	2	ENSMUSG00000030519,ENSMUSG00000028713
Ca,Co,Ed,Is,Cd	1	ENSMUSG00000073940
Ca,Co,Ed,Is,Cd,Dd	6	ENSMUSG00000074934,ENSMUSG00000025909,ENSMUSG00000035042,ENSMUSG00000067149,ENSMUSG00000053044,ENSMUSG00000033214
Ca,Co,Ed,Is,Cd,Te	0
Ca,Co,Ed,Is,Cd,Te,Dd	5	ENSMUSG00000009185,ENSMUSG00000041202,ENSMUSG00000065987,ENSMUSG00000079168,ENSMUSG00000051906
Ca,Co,Ed,Is,Dd	10	ENSMUSG00000039264,ENSMUSG00000030577,ENSMUSG00000020395,ENSMUSG00000024399,ENSMUSG00000000409,ENSMUSG00000002033,ENSMUSG00000055629,ENSMUSG00000052142,ENSMUSG00000051457,ENSMUSG00000003882
Ca,Co,Ed,Is,Te	0
Ca,Co,Ed,Is,Te,Dd	0
Ca,Co,Ed,Te	1	ENSMUSG00000031495
Ca,Co,Ed,Te,Dd	0
Ca,Co,Is	4	ENSMUSG00000038550,ENSMUSG00000025270,ENSMUSG00000032936,ENSMUSG00000022415
Ca,Co,Is,Cd	1	ENSMUSG00000043753
Ca,Co,Is,Cd,Dd	1	ENSMUSG00000053977
Ca,Co,Is,Cd,Te	0
Ca,Co,Is,Cd,Te,Dd	0
Ca,Co,Is,Dd	3	ENSMUSG00000073409,ENSMUSG00000069670,ENSMUSG00000060550
Ca,Co,Is,Te	0
Ca,Co,Is,Te,Dd	0
Ca,Co,Te	0
Ca,Co,Te,Dd	0
Ca,Dd	64	ENSMUSG00000064262,ENSMUSG00000078763,ENSMUSG00000039131,ENSMUSG00000040061,ENSMUSG00000015355,ENSMUSG00000064358,ENSMUSG00000020573,ENSMUSG00000020566,ENSMUSG00000034959,ENSMUSG00000019970,ENSMUSG00000030283,ENSMUSG00000044827,ENSMUSG00000058385,ENSMUSG00000024935,ENSMUSG00000024910,ENSMUSG00000024987,ENSMUSG00000044176,ENSMUSG00000020014,ENSMUSG00000038608,ENSMUSG00000024388,ENSMUSG00000090553,…
Ca,Ed	60	ENSMUSG00000040165,ENSMUSG00000029766,ENSMUSG00000078689,ENSMUSG00000030579,ENSMUSG00000039546,ENSMUSG00000015437,ENSMUSG00000015354,ENSMUSG00000064326,ENSMUSG00000103310,ENSMUSG00000103255,ENSMUSG00000068407,ENSMUSG00000044313,ENSMUSG00000103770,ENSMUSG00000030325,ENSMUSG00000113061,ENSMUSG00000029120,ENSMUSG00000044716,ENSMUSG00000010362,ENSMUSG00000034353,ENSMUSG00000048807,ENSMUSG00000073640,…
Ca,Ed,Cd	4	ENSMUSG00000044626,ENSMUSG00000090485,ENSMUSG00000007440,ENSMUSG00000102697
Ca,Ed,Cd,Dd	1	ENSMUSG00000022548
Ca,Ed,Cd,Te	0
Ca,Ed,Cd,Te,Dd	0
Ca,Ed,Dd	16	ENSMUSG00000030742,ENSMUSG00000040345,ENSMUSG00000078945,ENSMUSG00000005465,ENSMUSG00000044748,ENSMUSG00000009292,ENSMUSG00000016206,ENSMUSG00000031101,ENSMUSG00000011148,ENSMUSG00000049560,ENSMUSG00000017723,ENSMUSG00000046330,ENSMUSG00000032089,ENSMUSG00000047675,ENSMUSG00000033538,ENSMUSG00000047053
Ca,Ed,Is	14	ENSMUSG00000039058,ENSMUSG00000044863,ENSMUSG00000000739,ENSMUSG00000024526,ENSMUSG00000070645,ENSMUSG00000035226,ENSMUSG00000027568,ENSMUSG00000003469,ENSMUSG00000056553,ENSMUSG00000032572,ENSMUSG00000046805,ENSMUSG00000026587,ENSMUSG00000033981,ENSMUSG00000023966
Ca,Ed,Is,Cd	1	ENSMUSG00000051663
Ca,Ed,Is,Cd,Dd	3	ENSMUSG00000049109,ENSMUSG00000032348,ENSMUSG00000042351
Ca,Ed,Is,Cd,Te	0
Ca,Ed,Is,Cd,Te,Dd	0
Ca,Ed,Is,Dd	14	ENSMUSG00000030844,ENSMUSG00000030707,ENSMUSG00000030651,ENSMUSG00000041481,ENSMUSG00000079845,ENSMUSG00000026358,ENSMUSG00000035697,ENSMUSG00000001281,ENSMUSG00000050232,ENSMUSG00000074785,ENSMUSG00000042345,ENSMUSG00000026980,ENSMUSG00000004707,ENSMUSG00000038147
Ca,Ed,Is,Te	1	ENSMUSG00000024672
Ca,Ed,Is,Te,Dd	3	ENSMUSG00000064267,ENSMUSG00000034634,ENSMUSG00000112023
Ca,Ed,Te	2	ENSMUSG00000056529,ENSMUSG00000023992
Ca,Ed,Te,Dd	1	ENSMUSG00000029816
Ca,Is	25	ENSMUSG00000040229,ENSMUSG00000040254,ENSMUSG00000005503,ENSMUSG00000034926,ENSMUSG00000093877,ENSMUSG00000019772,ENSMUSG00000024677,ENSMUSG00000034796,ENSMUSG00000024553,ENSMUSG00000073591,ENSMUSG00000031919,ENSMUSG00000075324,ENSMUSG00000049410,ENSMUSG00000025431,ENSMUSG00000040747,ENSMUSG00000025175,ENSMUSG00000059108,ENSMUSG00000032702,ENSMUSG00000036502,ENSMUSG00000063297,ENSMUSG00000067215,…
Ca,Is,Cd	6	ENSMUSG00000048067,ENSMUSG00000041737,ENSMUSG00000025813,ENSMUSG00000003282,ENSMUSG00000046352,ENSMUSG00000018907
Ca,Is,Cd,Dd	1	ENSMUSG00000067049
Ca,Is,Cd,Te	0
Ca,Is,Cd,Te,Dd	0
Ca,Is,Dd	12	ENSMUSG00000030701,ENSMUSG00000024670,ENSMUSG00000073418,ENSMUSG00000026395,ENSMUSG00000079563,ENSMUSG00000031428,ENSMUSG00000050921,ENSMUSG00000001604,ENSMUSG00000032661,ENSMUSG00000056290,ENSMUSG00000061577,ENSMUSG00000043931
Ca,Is,Te	3	ENSMUSG00000073125,ENSMUSG00000069792,ENSMUSG00000053063
Ca,Is,Te,Dd	1	ENSMUSG00000016552
Ca,Te	4	ENSMUSG00000040522,ENSMUSG00000030935,ENSMUSG00000055214,ENSMUSG00000037482
Ca,Te,Dd	2	ENSMUSG00000015396,ENSMUSG00000024365
Cd	216	ENSMUSG00000040296,ENSMUSG00000078861,ENSMUSG00000040134,ENSMUSG00000054582,ENSMUSG00000030559,ENSMUSG00000039629,ENSMUSG00000025038,ENSMUSG00000025003,ENSMUSG00000040570,ENSMUSG00000015405,ENSMUSG00000030954,ENSMUSG00000040329,ENSMUSG00000040328,ENSMUSG00000078934,ENSMUSG00000103476,ENSMUSG00000054005,ENSMUSG00000030046,ENSMUSG00000020638,ENSMUSG00000044581,ENSMUSG00000044501,ENSMUSG00000020326,…
Cd,Dd	73	ENSMUSG00000078867,ENSMUSG00000078865,ENSMUSG00000078866,ENSMUSG00000078784,ENSMUSG00000029798,ENSMUSG00000040132,ENSMUSG00000029563,ENSMUSG00000040569,ENSMUSG00000068606,ENSMUSG00000020581,ENSMUSG00000044258,ENSMUSG00000044303,ENSMUSG00000030219,ENSMUSG00000029212,ENSMUSG00000048721,ENSMUSG00000034855,ENSMUSG00000034459,ENSMUSG00000038756,ENSMUSG00000090588,ENSMUSG00000016998,ENSMUSG00000090942,…
Cd,Te	1	ENSMUSG00000030921
Cd,Te,Dd	1	ENSMUSG00000074968
Co	245	ENSMUSG00000030889,ENSMUSG00000054850,ENSMUSG00000078716,ENSMUSG00000039154,ENSMUSG00000064065,ENSMUSG00000030691,ENSMUSG00000029503,ENSMUSG00000078576,ENSMUSG00000030583,ENSMUSG00000039616,ENSMUSG00000015652,ENSMUSG00000015627,ENSMUSG00000040694,ENSMUSG00000025082,ENSMUSG00000040543,ENSMUSG00000040452,ENSMUSG00000030945,ENSMUSG00000040314,ENSMUSG00000040387,ENSMUSG00000039391,ENSMUSG00000068587,…
Co,Cd	13	ENSMUSG00000073764,ENSMUSG00000000214,ENSMUSG00000024227,ENSMUSG00000031380,ENSMUSG00000021010,ENSMUSG00000070348,ENSMUSG00000035864,ENSMUSG00000015829,ENSMUSG00000115483,ENSMUSG00000022269,ENSMUSG00000036814,ENSMUSG00000046844,ENSMUSG00000047104
Co,Cd,Dd	7	ENSMUSG00000021250,ENSMUSG00000003545,ENSMUSG00000022037,ENSMUSG00000032098,ENSMUSG00000046585,ENSMUSG00000053219,ENSMUSG00000047228
Co,Cd,Te	0
Co,Cd,Te,Dd	1	ENSMUSG00000038418
Co,Dd	83	ENSMUSG00000030838,ENSMUSG00000039232,ENSMUSG00000039278,ENSMUSG00000054793,ENSMUSG00000064141,ENSMUSG00000078627,ENSMUSG00000030683,ENSMUSG00000074071,ENSMUSG00000015599,ENSMUSG00000040563,ENSMUSG00000005045,ENSMUSG00000019478,ENSMUSG00000044456,ENSMUSG00000054435,ENSMUSG00000054342,ENSMUSG00000029275,ENSMUSG00000044854,ENSMUSG00000029151,ENSMUSG00000034427,ENSMUSG00000034209,ENSMUSG00000058183,…
Co,Ed	33	ENSMUSG00000029832,ENSMUSG00000039269,ENSMUSG00000044534,ENSMUSG00000020520,ENSMUSG00000020848,ENSMUSG00000030086,ENSMUSG00000073802,ENSMUSG00000024968,ENSMUSG00000044217,ENSMUSG00000034768,ENSMUSG00000024030,ENSMUSG00000048236,ENSMUSG00000031385,ENSMUSG00000055692,ENSMUSG00000025207,ENSMUSG00000035105,ENSMUSG00000025582,ENSMUSG00000017713,ENSMUSG00000027603,ENSMUSG00000027316,ENSMUSG00000056596,…
Co,Ed,Cd	3	ENSMUSG00000044206,ENSMUSG00000035202,ENSMUSG00000043458
Co,Ed,Cd,Dd	9	ENSMUSG00000029651,ENSMUSG00000039364,ENSMUSG00000024673,ENSMUSG00000025876,ENSMUSG00000042759,ENSMUSG00000027073,ENSMUSG00000061718,ENSMUSG00000032053,ENSMUSG00000071719
Co,Ed,Cd,Te	0
Co,Ed,Cd,Te,Dd	0
Co,Ed,Dd	29	ENSMUSG00000054612,ENSMUSG00000020279,ENSMUSG00000019737,ENSMUSG00000034227,ENSMUSG00000000791,ENSMUSG00000024669,ENSMUSG00000048031,ENSMUSG00000038508,ENSMUSG00000014453,ENSMUSG00000000627,ENSMUSG00000041907,ENSMUSG00000026117,ENSMUSG00000041798,ENSMUSG00000045826,ENSMUSG00000021087,ENSMUSG00000035711,ENSMUSG00000040938,ENSMUSG00000050357,ENSMUSG00000040714,ENSMUSG00000049112,ENSMUSG00000049556,…
Co,Ed,Is	4	ENSMUSG00000040136,ENSMUSG00000048521,ENSMUSG00000073492,ENSMUSG00000053693
Co,Ed,Is,Cd	1	ENSMUSG00000050830
Co,Ed,Is,Cd,Dd	4	ENSMUSG00000025461,ENSMUSG00000052477,ENSMUSG00000026417,ENSMUSG00000023078
Co,Ed,Is,Cd,Te	0
Co,Ed,Is,Cd,Te,Dd	0
Co,Ed,Is,Dd	4	ENSMUSG00000030798,ENSMUSG00000034730,ENSMUSG00000070691,ENSMUSG00000018168
Co,Ed,Is,Te	1	ENSMUSG00000049723
Co,Ed,Is,Te,Dd	0
Co,Ed,Te	0
Co,Ed,Te,Dd	0
Co,Is	10	ENSMUSG00000039059,ENSMUSG00000030032,ENSMUSG00000048967,ENSMUSG00000087444,ENSMUSG00000055866,ENSMUSG00000031391,ENSMUSG00000031465,ENSMUSG00000025889,ENSMUSG00000042453,ENSMUSG00000018411
Co,Is,Cd	0
Co,Is,Cd,Dd	2	ENSMUSG00000027500,ENSMUSG00000061601
Co,Is,Cd,Te	0
Co,Is,Cd,Te,Dd	1	ENSMUSG00000044349
Co,Is,Dd	9	ENSMUSG00000005763,ENSMUSG00000039395,ENSMUSG00000029449,ENSMUSG00000016283,ENSMUSG00000050195,ENSMUSG00000032589,ENSMUSG00000046110,ENSMUSG00000026770,ENSMUSG00000033597
Co,Is,Te	0
Co,Is,Te,Dd	0
Co,Te	3	ENSMUSG00000070526,ENSMUSG00000060459,ENSMUSG00000022519
Co,Te,Dd	2	ENSMUSG00000030483,ENSMUSG00000041608
Dd	1153	ENSMUSG00000029875,ENSMUSG00000029860,ENSMUSG00000005886,ENSMUSG00000030847,ENSMUSG00000064288,ENSMUSG00000040276,ENSMUSG00000040270,ENSMUSG00000078870,ENSMUSG00000078877,ENSMUSG00000040225,ENSMUSG00000039238,ENSMUSG00000039236,ENSMUSG00000054892,ENSMUSG00000040205,ENSMUSG00000015242,ENSMUSG00000039215,ENSMUSG00000030887,ENSMUSG00000039205,ENSMUSG00000054863,ENSMUSG00000029757,ENSMUSG00000030744,…
Ed	723	ENSMUSG00000029829,ENSMUSG00000030865,ENSMUSG00000030862,ENSMUSG00000029864,ENSMUSG00000030854,ENSMUSG00000040280,ENSMUSG00000064246,ENSMUSG00000064247,ENSMUSG00000064254,ENSMUSG00000040212,ENSMUSG00000064225,ENSMUSG00000039208,ENSMUSG00000040258,ENSMUSG00000029715,ENSMUSG00000005705,ENSMUSG00000030789,ENSMUSG00000054763,ENSMUSG00000015126,ENSMUSG00000029762,ENSMUSG00000064109,ENSMUSG00000015134,…
Ed,Cd	10	ENSMUSG00000078607,ENSMUSG00000039313,ENSMUSG00000099032,ENSMUSG00000021872,ENSMUSG00000055733,ENSMUSG00000006574,ENSMUSG00000025774,ENSMUSG00000003418,ENSMUSG00000046790,ENSMUSG00000026764
Ed,Cd,Dd	16	ENSMUSG00000078853,ENSMUSG00000040693,ENSMUSG00000078920,ENSMUSG00000068246,ENSMUSG00000030107,ENSMUSG00000006930,ENSMUSG00000055561,ENSMUSG00000031551,ENSMUSG00000049404,ENSMUSG00000074896,ENSMUSG00000025658,ENSMUSG00000037035,ENSMUSG00000003379,ENSMUSG00000042474,ENSMUSG00000046718,ENSMUSG00000004344
Ed,Cd,Te	1	ENSMUSG00000049093
Ed,Cd,Te,Dd	0
Ed,Dd	318	ENSMUSG00000029819,ENSMUSG00000064264,ENSMUSG00000040247,ENSMUSG00000030724,ENSMUSG00000029725,ENSMUSG00000039179,ENSMUSG00000039153,ENSMUSG00000029614,ENSMUSG00000015090,ENSMUSG00000015092,ENSMUSG00000040048,ENSMUSG00000030647,ENSMUSG00000015013,ENSMUSG00000040026,ENSMUSG00000039016,ENSMUSG00000030688,ENSMUSG00000078554,ENSMUSG00000030595,ENSMUSG00000025020,ENSMUSG00000001056,ENSMUSG00000049086,…
Ed,Is	34	ENSMUSG00000025094,ENSMUSG00000029372,ENSMUSG00000029373,ENSMUSG00000030329,ENSMUSG00000063687,ENSMUSG00000041729,ENSMUSG00000021702,ENSMUSG00000031734,ENSMUSG00000041046,ENSMUSG00000045498,ENSMUSG00000045259,ENSMUSG00000059824,ENSMUSG00000025469,ENSMUSG00000025468,ENSMUSG00000025481,ENSMUSG00000040907,ENSMUSG00000025150,ENSMUSG00000042874,ENSMUSG00000056222,ENSMUSG00000036905,ENSMUSG00000022177,…
Ed,Is,Cd	3	ENSMUSG00000078922,ENSMUSG00000050295,ENSMUSG00000025165
Ed,Is,Cd,Dd	2	ENSMUSG00000027347,ENSMUSG00000047844
Ed,Is,Cd,Te	0
Ed,Is,Cd,Te,Dd	0
Ed,Is,Dd	32	ENSMUSG00000030745,ENSMUSG00000039699,ENSMUSG00000040592,ENSMUSG00000020437,ENSMUSG00000068129,ENSMUSG00000058818,ENSMUSG00000048163,ENSMUSG00000038642,ENSMUSG00000024338,ENSMUSG00000000290,ENSMUSG00000097221,ENSMUSG00000098112,ENSMUSG00000050671,ENSMUSG00000050600,ENSMUSG00000066363,ENSMUSG00000036887,ENSMUSG00000022148,ENSMUSG00000032207,ENSMUSG00000022584,ENSMUSG00000051747,ENSMUSG00000075702,…
Ed,Is,Te	0
Ed,Is,Te,Dd	3	ENSMUSG00000036526,ENSMUSG00000027863,ENSMUSG00000023274
Ed,Te	13	ENSMUSG00000015340,ENSMUSG00000030247,ENSMUSG00000048779,ENSMUSG00000019194,ENSMUSG00000024164,ENSMUSG00000059336,ENSMUSG00000021565,ENSMUSG00000060780,ENSMUSG00000091619,ENSMUSG00000027322,ENSMUSG00000032313,ENSMUSG00000038370,ENSMUSG00000057897
Ed,Te,Dd	6	ENSMUSG00000058715,ENSMUSG00000032446,ENSMUSG00000022952,ENSMUSG00000071713,ENSMUSG00000018774,ENSMUSG00000027953
Is	166	ENSMUSG00000029821,ENSMUSG00000015222,ENSMUSG00000078868,ENSMUSG00000030731,ENSMUSG00000030781,ENSMUSG00000030761,ENSMUSG00000039126,ENSMUSG00000005677,ENSMUSG00000078630,ENSMUSG00000078653,ENSMUSG00000078588,ENSMUSG00000030589,ENSMUSG00000040514,ENSMUSG00000040441,ENSMUSG00000054945,ENSMUSG00000029919,ENSMUSG00000040310,ENSMUSG00000020676,ENSMUSG00000020609,ENSMUSG00000020399,ENSMUSG00000019464,…
Is,Cd	4	ENSMUSG00000024411,ENSMUSG00000042717,ENSMUSG00000036192,ENSMUSG00000033849
Is,Cd,Dd	6	ENSMUSG00000064357,ENSMUSG00000064354,ENSMUSG00000054072,ENSMUSG00000044708,ENSMUSG00000000386,ENSMUSG00000060802
Is,Cd,Te	0
Is,Cd,Te,Dd	0
Is,Dd	68	ENSMUSG00000064202,ENSMUSG00000078719,ENSMUSG00000030607,ENSMUSG00000029607,ENSMUSG00000050022,ENSMUSG00000039521,ENSMUSG00000039452,ENSMUSG00000103332,ENSMUSG00000030303,ENSMUSG00000030336,ENSMUSG00000030124,ENSMUSG00000073805,ENSMUSG00000034833,ENSMUSG00000038738,ENSMUSG00000014813,ENSMUSG00000063656,ENSMUSG00000016529,ENSMUSG00000041515,ENSMUSG00000041827,ENSMUSG00000075296,ENSMUSG00000089844,…
Is,Te	3	ENSMUSG00000020120,ENSMUSG00000021573,ENSMUSG00000022901
Is,Te,Dd	1	ENSMUSG00000022504
Te	86	ENSMUSG00000029830,ENSMUSG00000029838,ENSMUSG00000040170,ENSMUSG00000040127,ENSMUSG00000039092,ENSMUSG00000039004,ENSMUSG00000039457,ENSMUSG00000068428,ENSMUSG00000093923,ENSMUSG00000029343,ENSMUSG00000044726,ENSMUSG00000034295,ENSMUSG00000024899,ENSMUSG00000044197,ENSMUSG00000019102,ENSMUSG00000020123,ENSMUSG00000034639,ENSMUSG00000087408,ENSMUSG00000097425,ENSMUSG00000041423,ENSMUSG00000031980,…
Te,Dd	14	ENSMUSG00000030730,ENSMUSG00000078954,ENSMUSG00000034266,ENSMUSG00000034799,ENSMUSG00000038421,ENSMUSG00000110170,ENSMUSG00000021091,ENSMUSG00000050896,ENSMUSG00000066108,ENSMUSG00000036813,ENSMUSG00000022871,ENSMUSG00000033595,ENSMUSG00000067704,ENSMUSG00000047281

## Sheet: Downregulated
Groups	Intersection number of genes	Intersection genes
Ca	524	ENSMUSG00000029814,ENSMUSG00000030887,ENSMUSG00000039205,ENSMUSG00000078813,ENSMUSG00000005732,ENSMUSG00000054708,ENSMUSG00000029725,ENSMUSG00000039168,ENSMUSG00000064125,ENSMUSG00000078787,ENSMUSG00000030781,ENSMUSG00000078721,ENSMUSG00000078719,ENSMUSG00000029761,ENSMUSG00000005677,ENSMUSG00000029623,ENSMUSG00000029610,ENSMUSG00000029607,ENSMUSG00000015092,ENSMUSG00000040048,ENSMUSG00000039055,…
Ca,Cd	71	ENSMUSG00000029821,ENSMUSG00000030717,ENSMUSG00000040690,ENSMUSG00000015312,ENSMUSG00000039376,ENSMUSG00000019647,ENSMUSG00000020542,ENSMUSG00000019539,ENSMUSG00000020439,ENSMUSG00000020325,ENSMUSG00000030409,ENSMUSG00000054256,ENSMUSG00000020866,ENSMUSG00000030122,ENSMUSG00000029163,ENSMUSG00000024897,ENSMUSG00000048644,ENSMUSG00000020186,ENSMUSG00000058806,ENSMUSG00000044080,ENSMUSG00000034762,…
Ca,Cd,Dd	6	ENSMUSG00000020312,ENSMUSG00000048304,ENSMUSG00000031253,ENSMUSG00000031673,ENSMUSG00000071847,ENSMUSG00000026785
Ca,Cd,Te	1	ENSMUSG00000037060
Ca,Cd,Te,Dd	0
Ca,Co	18	ENSMUSG00000029843,ENSMUSG00000039239,ENSMUSG00000039257,ENSMUSG00000039103,ENSMUSG00000024678,ENSMUSG00000026360,ENSMUSG00000026077,ENSMUSG00000069267,ENSMUSG00000050397,ENSMUSG00000027208,ENSMUSG00000026768,ENSMUSG00000099517,ENSMUSG00000026828,ENSMUSG00000028212,ENSMUSG00000038128,ENSMUSG00000033024,ENSMUSG00000033544,ENSMUSG00000062151
Ca,Co,Cd	16	ENSMUSG00000029718,ENSMUSG00000020674,ENSMUSG00000068392,ENSMUSG00000000794,ENSMUSG00000038400,ENSMUSG00000038457,ENSMUSG00000026193,ENSMUSG00000006014,ENSMUSG00000031616,ENSMUSG00000001349,ENSMUSG00000001334,ENSMUSG00000074736,ENSMUSG00000066842,ENSMUSG00000032024,ENSMUSG00000036264,ENSMUSG00000018927
Ca,Co,Cd,Dd	9	ENSMUSG00000054667,ENSMUSG00000030116,ENSMUSG00000005124,ENSMUSG00000019122,ENSMUSG00000075318,ENSMUSG00000032925,ENSMUSG00000036596,ENSMUSG00000036412,ENSMUSG00000004098
Ca,Co,Cd,Te	0
Ca,Co,Cd,Te,Dd	0
Ca,Co,Dd	3	ENSMUSG00000034059,ENSMUSG00000036446,ENSMUSG00000067158
Ca,Co,Ed	6	ENSMUSG00000020264,ENSMUSG00000041653,ENSMUSG00000027082,ENSMUSG00000042489,ENSMUSG00000022053,ENSMUSG00000033581
Ca,Co,Ed,Cd	0
Ca,Co,Ed,Cd,Dd	6	ENSMUSG00000031963,ENSMUSG00000031250,ENSMUSG00000021388,ENSMUSG00000025479,ENSMUSG00000028785,ENSMUSG00000027715
Ca,Co,Ed,Cd,Te	0
Ca,Co,Ed,Cd,Te,Dd	0
Ca,Co,Ed,Dd	2	ENSMUSG00000079465,ENSMUSG00000028024
Ca,Co,Ed,Is	2	ENSMUSG00000030278,ENSMUSG00000061780
Ca,Co,Ed,Is,Cd	8	ENSMUSG00000034205,ENSMUSG00000024598,ENSMUSG00000031004,ENSMUSG00000025272,ENSMUSG00000027559,ENSMUSG00000052854,ENSMUSG00000027750,ENSMUSG00000062515
Ca,Co,Ed,Is,Cd,Dd	12	ENSMUSG00000020053,ENSMUSG00000048126,ENSMUSG00000002266,ENSMUSG00000027204,ENSMUSG00000042834,ENSMUSG00000036766,ENSMUSG00000022025,ENSMUSG00000012705,ENSMUSG00000026837,ENSMUSG00000028339,ENSMUSG00000067780,ENSMUSG00000018593
Ca,Co,Ed,Is,Cd,Te	1	ENSMUSG00000021614
Ca,Co,Ed,Is,Cd,Te,Dd	2	ENSMUSG00000029675,ENSMUSG00000024529
Ca,Co,Ed,Is,Dd	3	ENSMUSG00000026042,ENSMUSG00000040998,ENSMUSG00000036040
Ca,Co,Ed,Is,Te	0
Ca,Co,Ed,Is,Te,Dd	4	ENSMUSG00000029661,ENSMUSG00000015568,ENSMUSG00000026043,ENSMUSG00000001506
Ca,Co,Ed,Te	0
Ca,Co,Ed,Te,Dd	0
Ca,Co,Is	5	ENSMUSG00000030616,ENSMUSG00000020303,ENSMUSG00000032744,ENSMUSG00000095217,ENSMUSG00000027966
Ca,Co,Is,Cd	18	ENSMUSG00000078794,ENSMUSG00000064179,ENSMUSG00000054640,ENSMUSG00000005397,ENSMUSG00000034040,ENSMUSG00000000753,ENSMUSG00000068122,ENSMUSG00000020241,ENSMUSG00000024011,ENSMUSG00000024440,ENSMUSG00000006369,ENSMUSG00000060572,ENSMUSG00000070436,ENSMUSG00000001119,ENSMUSG00000027217,ENSMUSG00000056481,ENSMUSG00000032334,ENSMUSG00000023828
Ca,Co,Is,Cd,Dd	8	ENSMUSG00000029096,ENSMUSG00000024538,ENSMUSG00000027408,ENSMUSG00000091345,ENSMUSG00000022816,ENSMUSG00000026574,ENSMUSG00000036545,ENSMUSG00000036334
Ca,Co,Is,Cd,Te	2	ENSMUSG00000002289,ENSMUSG00000031502
Ca,Co,Is,Cd,Te,Dd	0
Ca,Co,Is,Dd	2	ENSMUSG00000042254,ENSMUSG00000033350
Ca,Co,Is,Te	1	ENSMUSG00000040666
Ca,Co,Is,Te,Dd	2	ENSMUSG00000044338,ENSMUSG00000042436
Ca,Co,Te	0
Ca,Co,Te,Dd	0
Ca,Dd	8	ENSMUSG00000039579,ENSMUSG00000024327,ENSMUSG00000026344,ENSMUSG00000059149,ENSMUSG00000028226,ENSMUSG00000028036,ENSMUSG00000043501,ENSMUSG00000033576
Ca,Ed	35	ENSMUSG00000030867,ENSMUSG00000040204,ENSMUSG00000054934,ENSMUSG00000064367,ENSMUSG00000064363,ENSMUSG00000064370,ENSMUSG00000064345,ENSMUSG00000029334,ENSMUSG00000034329,ENSMUSG00000048922,ENSMUSG00000063796,ENSMUSG00000031910,ENSMUSG00000090215,ENSMUSG00000069793,ENSMUSG00000021714,ENSMUSG00000021675,ENSMUSG00000094447,ENSMUSG00000050424,ENSMUSG00000025243,ENSMUSG00000025574,ENSMUSG00000042672,…
Ca,Ed,Cd	2	ENSMUSG00000061603,ENSMUSG00000072720
Ca,Ed,Cd,Dd	1	ENSMUSG00000029778
Ca,Ed,Cd,Te	1	ENSMUSG00000030546
Ca,Ed,Cd,Te,Dd	0
Ca,Ed,Dd	1	ENSMUSG00000000184
Ca,Ed,Is	7	ENSMUSG00000029687,ENSMUSG00000021613,ENSMUSG00000035683,ENSMUSG00000045328,ENSMUSG00000060093,ENSMUSG00000042607,ENSMUSG00000026605
Ca,Ed,Is,Cd	1	ENSMUSG00000027469
Ca,Ed,Is,Cd,Dd	2	ENSMUSG00000041482,ENSMUSG00000022665
Ca,Ed,Is,Cd,Te	0
Ca,Ed,Is,Cd,Te,Dd	0
Ca,Ed,Is,Dd	2	ENSMUSG00000038943,ENSMUSG00000031725
Ca,Ed,Is,Te	0
Ca,Ed,Is,Te,Dd	0
Ca,Ed,Te	0
Ca,Ed,Te,Dd	0
Ca,Is	56	ENSMUSG00000029875,ENSMUSG00000064288,ENSMUSG00000054523,ENSMUSG00000050058,ENSMUSG00000040489,ENSMUSG00000039488,ENSMUSG00000020622,ENSMUSG00000020475,ENSMUSG00000034913,ENSMUSG00000044787,ENSMUSG00000024771,ENSMUSG00000024768,ENSMUSG00000048686,ENSMUSG00000058773,ENSMUSG00000068101,ENSMUSG00000044084,ENSMUSG00000063632,ENSMUSG00000048077,ENSMUSG00000038587,ENSMUSG00000048206,ENSMUSG00000090369,…
Ca,Is,Cd	12	ENSMUSG00000030782,ENSMUSG00000048078,ENSMUSG00000016763,ENSMUSG00000031503,ENSMUSG00000006403,ENSMUSG00000021256,ENSMUSG00000027230,ENSMUSG00000071984,ENSMUSG00000032338,ENSMUSG00000056900,ENSMUSG00000042109,ENSMUSG00000028989
Ca,Is,Cd,Dd	1	ENSMUSG00000037892
Ca,Is,Cd,Te	0
Ca,Is,Cd,Te,Dd	0
Ca,Is,Dd	2	ENSMUSG00000068522,ENSMUSG00000027435
Ca,Is,Te	0
Ca,Is,Te,Dd	0
Ca,Te	2	ENSMUSG00000030268,ENSMUSG00000031994
Ca,Te,Dd	0
Cd	551	ENSMUSG00000029819,ENSMUSG00000005836,ENSMUSG00000040280,ENSMUSG00000040212,ENSMUSG00000039206,ENSMUSG00000040260,ENSMUSG00000040249,ENSMUSG00000029710,ENSMUSG00000030748,ENSMUSG00000030730,ENSMUSG00000039115,ENSMUSG00000030785,ENSMUSG00000029771,ENSMUSG00000029765,ENSMUSG00000029622,ENSMUSG00000030606,ENSMUSG00000078670,ENSMUSG00000039057,ENSMUSG00000054675,ENSMUSG00000029674,ENSMUSG00000030657,…
Cd,Dd	41	ENSMUSG00000030796,ENSMUSG00000015085,ENSMUSG00000025089,ENSMUSG00000068452,ENSMUSG00000034926,ENSMUSG00000029490,ENSMUSG00000019935,ENSMUSG00000078307,ENSMUSG00000044921,ENSMUSG00000020808,ENSMUSG00000034310,ENSMUSG00000000958,ENSMUSG00000009614,ENSMUSG00000000555,ENSMUSG00000024620,ENSMUSG00000000392,ENSMUSG00000041378,ENSMUSG00000055254,ENSMUSG00000069920,ENSMUSG00000070802,ENSMUSG00000031266,…
Cd,Te	11	ENSMUSG00000030772,ENSMUSG00000068335,ENSMUSG00000063713,ENSMUSG00000002020,ENSMUSG00000069830,ENSMUSG00000035364,ENSMUSG00000025784,ENSMUSG00000037005,ENSMUSG00000032492,ENSMUSG00000028369,ENSMUSG00000038077
Cd,Te,Dd	5	ENSMUSG00000030351,ENSMUSG00000020846,ENSMUSG00000031825,ENSMUSG00000028600,ENSMUSG00000027800
Co	179	ENSMUSG00000029838,ENSMUSG00000054893,ENSMUSG00000078861,ENSMUSG00000039196,ENSMUSG00000078763,ENSMUSG00000054720,ENSMUSG00000040035,ENSMUSG00000078640,ENSMUSG00000078606,ENSMUSG00000078495,ENSMUSG00000078502,ENSMUSG00000049001,ENSMUSG00000039530,ENSMUSG00000078994,ENSMUSG00000064360,ENSMUSG00000040321,ENSMUSG00000078934,ENSMUSG00000020672,ENSMUSG00000020492,ENSMUSG00000058914,ENSMUSG00000020363,…
Co,Cd	32	ENSMUSG00000078800,ENSMUSG00000040046,ENSMUSG00000030674,ENSMUSG00000050010,ENSMUSG00000005338,ENSMUSG00000019838,ENSMUSG00000019278,ENSMUSG00000020121,ENSMUSG00000020000,ENSMUSG00000038623,ENSMUSG00000014846,ENSMUSG00000041741,ENSMUSG00000069763,ENSMUSG00000070645,ENSMUSG00000021303,ENSMUSG00000040740,ENSMUSG00000050587,ENSMUSG00000032502,ENSMUSG00000032374,ENSMUSG00000007805,ENSMUSG00000046179,…
Co,Cd,Dd	13	ENSMUSG00000019899,ENSMUSG00000010086,ENSMUSG00000024713,ENSMUSG00000038463,ENSMUSG00000000223,ENSMUSG00000031170,ENSMUSG00000055632,ENSMUSG00000045215,ENSMUSG00000015852,ENSMUSG00000052504,ENSMUSG00000022371,ENSMUSG00000007097,ENSMUSG00000037813
Co,Cd,Te	1	ENSMUSG00000063975
Co,Cd,Te,Dd	1	ENSMUSG00000038233
Co,Dd	27	ENSMUSG00000044365,ENSMUSG00000020427,ENSMUSG00000029231,ENSMUSG00000024990,ENSMUSG00000000197,ENSMUSG00000038702,ENSMUSG00000063887,ENSMUSG00000100235,ENSMUSG00000045658,ENSMUSG00000031740,ENSMUSG00000059588,ENSMUSG00000035948,ENSMUSG00000040950,ENSMUSG00000049103,ENSMUSG00000025893,ENSMUSG00000025776,ENSMUSG00000101389,ENSMUSG00000027513,ENSMUSG00000066364,ENSMUSG00000056870,ENSMUSG00000036095,…
Co,Ed	23	ENSMUSG00000030562,ENSMUSG00000020493,ENSMUSG00000029414,ENSMUSG00000029314,ENSMUSG00000034825,ENSMUSG00000051341,ENSMUSG00000079017,ENSMUSG00000094622,ENSMUSG00000021732,ENSMUSG00000055737,ENSMUSG00000055612,ENSMUSG00000021390,ENSMUSG00000045392,ENSMUSG00000039956,ENSMUSG00000074272,ENSMUSG00000074158,ENSMUSG00000035133,ENSMUSG00000042284,ENSMUSG00000046080,ENSMUSG00000061100,ENSMUSG00000036131,…
Co,Ed,Cd	6	ENSMUSG00000029759,ENSMUSG00000020176,ENSMUSG00000094910,ENSMUSG00000031367,ENSMUSG00000022367,ENSMUSG00000028068
Co,Ed,Cd,Dd	6	ENSMUSG00000041633,ENSMUSG00000027669,ENSMUSG00000066361,ENSMUSG00000046169,ENSMUSG00000037379,ENSMUSG00000027797
Co,Ed,Cd,Te	0
Co,Ed,Cd,Te,Dd	1	ENSMUSG00000049804
Co,Ed,Dd	6	ENSMUSG00000024972,ENSMUSG00000031342,ENSMUSG00000055782,ENSMUSG00000031489,ENSMUSG00000022674,ENSMUSG00000026834
Co,Ed,Is	7	ENSMUSG00000020330,ENSMUSG00000020914,ENSMUSG00000035775,ENSMUSG00000022033,ENSMUSG00000012443,ENSMUSG00000038379,ENSMUSG00000033952
Co,Ed,Is,Cd	1	ENSMUSG00000019846
Co,Ed,Is,Cd,Dd	4	ENSMUSG00000031595,ENSMUSG00000022440,ENSMUSG00000053441,ENSMUSG00000067276
Co,Ed,Is,Cd,Te	0
Co,Ed,Is,Cd,Te,Dd	0
Co,Ed,Is,Dd	2	ENSMUSG00000005640,ENSMUSG00000054555
Co,Ed,Is,Te	0
Co,Ed,Is,Te,Dd	0
Co,Ed,Te	0
Co,Ed,Te,Dd	0
Co,Is	11	ENSMUSG00000034394,ENSMUSG00000024049,ENSMUSG00000041731,ENSMUSG00000041696,ENSMUSG00000059878,ENSMUSG00000025185,ENSMUSG00000091455,ENSMUSG00000042581,ENSMUSG00000053593,ENSMUSG00000028111,ENSMUSG00000057182
Co,Is,Cd	4	ENSMUSG00000005958,ENSMUSG00000090084,ENSMUSG00000021508,ENSMUSG00000063275
Co,Is,Cd,Dd	4	ENSMUSG00000024084,ENSMUSG00000031274,ENSMUSG00000026589,ENSMUSG00000028047
Co,Is,Cd,Te	0
Co,Is,Cd,Te,Dd	0
Co,Is,Dd	2	ENSMUSG00000044201,ENSMUSG00000090919
Co,Is,Te	0
Co,Is,Te,Dd	0
Co,Te	2	ENSMUSG00000069305,ENSMUSG00000047678
Co,Te,Dd	0
Dd	362	ENSMUSG00000029811,ENSMUSG00000029802,ENSMUSG00000029851,ENSMUSG00000030729,ENSMUSG00000054763,ENSMUSG00000039109,ENSMUSG00000040138,ENSMUSG00000030792,ENSMUSG00000030629,ENSMUSG00000040055,ENSMUSG00000040093,ENSMUSG00000039099,ENSMUSG00000029669,ENSMUSG00000030643,ENSMUSG00000040016,ENSMUSG00000039005,ENSMUSG00000039628,ENSMUSG00000040612,ENSMUSG00000040605,ENSMUSG00000039601,ENSMUSG00000015652,…
Ed	311	ENSMUSG00000040297,ENSMUSG00000040274,ENSMUSG00000078889,ENSMUSG00000029752,ENSMUSG00000039187,ENSMUSG00000078773,ENSMUSG00000030759,ENSMUSG00000005628,ENSMUSG00000078653,ENSMUSG00000039092,ENSMUSG00000030641,ENSMUSG00000030671,ENSMUSG00000078521,ENSMUSG00000001021,ENSMUSG00000040648,ENSMUSG00000025001,ENSMUSG00000074060,ENSMUSG00000025059,ENSMUSG00000050064,ENSMUSG00000078995,ENSMUSG00000039396,…
Ed,Cd	15	ENSMUSG00000068587,ENSMUSG00000019942,ENSMUSG00000000805,ENSMUSG00000000440,ENSMUSG00000024501,ENSMUSG00000000317,ENSMUSG00000040711,ENSMUSG00000037010,ENSMUSG00000061816,ENSMUSG00000061080,ENSMUSG00000043719,ENSMUSG00000043556,ENSMUSG00000047686,ENSMUSG00000023914,ENSMUSG00000023015
Ed,Cd,Dd	6	ENSMUSG00000030495,ENSMUSG00000020154,ENSMUSG00000070942,ENSMUSG00000021697,ENSMUSG00000046275,ENSMUSG00000051855
Ed,Cd,Te	0
Ed,Cd,Te,Dd	0
Ed,Dd	40	ENSMUSG00000039167,ENSMUSG00000039155,ENSMUSG00000020649,ENSMUSG00000068299,ENSMUSG00000044288,ENSMUSG00000113255,ENSMUSG00000019966,ENSMUSG00000005360,ENSMUSG00000005233,ENSMUSG00000030228,ENSMUSG00000073988,ENSMUSG00000058207,ENSMUSG00000000948,ENSMUSG00000034645,ENSMUSG00000107478,ENSMUSG00000048503,ENSMUSG00000024614,ENSMUSG00000041431,ENSMUSG00000110185,ENSMUSG00000026097,ENSMUSG00000031290,…
Ed,Is	51	ENSMUSG00000029679,ENSMUSG00000025081,ENSMUSG00000040594,ENSMUSG00000030924,ENSMUSG00000030963,ENSMUSG00000039385,ENSMUSG00000005045,ENSMUSG00000034906,ENSMUSG00000093979,ENSMUSG00000020963,ENSMUSG00000029212,ENSMUSG00000020102,ENSMUSG00000010592,ENSMUSG00000034552,ENSMUSG00000009628,ENSMUSG00000048327,ENSMUSG00000041219,ENSMUSG00000075316,ENSMUSG00000026224,ENSMUSG00000002265,ENSMUSG00000002055,…
Ed,Is,Cd	6	ENSMUSG00000029516,ENSMUSG00000019326,ENSMUSG00000020897,ENSMUSG00000034687,ENSMUSG00000044042,ENSMUSG00000026147
Ed,Is,Cd,Dd	7	ENSMUSG00000039252,ENSMUSG00000020185,ENSMUSG00000048388,ENSMUSG00000031239,ENSMUSG00000047497,ENSMUSG00000033569,ENSMUSG00000037725
Ed,Is,Cd,Te	0
Ed,Is,Cd,Te,Dd	0
Ed,Is,Dd	2	ENSMUSG00000048368,ENSMUSG00000025529
Ed,Is,Te	0
Ed,Is,Te,Dd	0
Ed,Te	3	ENSMUSG00000001027,ENSMUSG00000019989,ENSMUSG00000039954
Ed,Te,Dd	1	ENSMUSG00000031209
Is	595	ENSMUSG00000029828,ENSMUSG00000029867,ENSMUSG00000029869,ENSMUSG00000030851,ENSMUSG00000064272,ENSMUSG00000040298,ENSMUSG00000030898,ENSMUSG00000039224,ENSMUSG00000015242,ENSMUSG00000029883,ENSMUSG00000039209,ENSMUSG00000040231,ENSMUSG00000029707,ENSMUSG00000039198,ENSMUSG00000078796,ENSMUSG00000039174,ENSMUSG00000039179,ENSMUSG00000029784,ENSMUSG00000029788,ENSMUSG00000029769,ENSMUSG00000029766,…
Is,Cd	28	ENSMUSG00000064080,ENSMUSG00000040147,ENSMUSG00000030677,ENSMUSG00000050069,ENSMUSG00000020689,ENSMUSG00000029070,ENSMUSG00000029436,ENSMUSG00000058626,ENSMUSG00000048500,ENSMUSG00000048387,ENSMUSG00000031972,ENSMUSG00000026398,ENSMUSG00000026211,ENSMUSG00000069855,ENSMUSG00000021262,ENSMUSG00000001473,ENSMUSG00000001555,ENSMUSG00000042821,ENSMUSG00000032968,ENSMUSG00000022883,ENSMUSG00000032125,…
Is,Cd,Dd	13	ENSMUSG00000029544,ENSMUSG00000009246,ENSMUSG00000024232,ENSMUSG00000016494,ENSMUSG00000059921,ENSMUSG00000021186,ENSMUSG00000042804,ENSMUSG00000052516,ENSMUSG00000017002,ENSMUSG00000066438,ENSMUSG00000017446,ENSMUSG00000002900,ENSMUSG00000023571
Is,Cd,Te	0
Is,Cd,Te,Dd	0
Is,Dd	10	ENSMUSG00000025082,ENSMUSG00000021835,ENSMUSG00000050930,ENSMUSG00000001943,ENSMUSG00000022032,ENSMUSG00000022034,ENSMUSG00000051401,ENSMUSG00000018986,ENSMUSG00000028950,ENSMUSG00000028017
Is,Te	2	ENSMUSG00000029189,ENSMUSG00000058152
Is,Te,Dd	0
Te	64	ENSMUSG00000040498,ENSMUSG00000015337,ENSMUSG00000054013,ENSMUSG00000019577,ENSMUSG00000068373,ENSMUSG00000093948,ENSMUSG00000093927,ENSMUSG00000020884,ENSMUSG00000030148,ENSMUSG00000019785,ENSMUSG00000058351,ENSMUSG00000034127,ENSMUSG00000034452,ENSMUSG00000048376,ENSMUSG00000038968,ENSMUSG00000063844,ENSMUSG00000073245,ENSMUSG00000090141,ENSMUSG00000075066,ENSMUSG00000090639,ENSMUSG00000094651,…
Te,Dd	4	ENSMUSG00000001025,ENSMUSG00000079343,ENSMUSG00000060487,ENSMUSG00000046295
