# Supplementary material for: Anatomical Transcriptome Atlas of the Male Mouse Reproductive System During Aging
Source: Front Cell Dev Biol. 2022 Feb 8;9:782824. doi: 10.3389/fcell.2021.782824 (PMC8861499; doi:10.3389/fcell.2021.782824)
Supplement: Supplementary file 4 [file Table6.XLSX]

## Sheet: Sheet1
Segment	AccID	Gene name	Gene biotype	3m-Te1	3m-Te2	3m-Te3	3m-Te4	3M-Ed1	3M-Ed2	3M-Ed3	3M-Ed4	3M-Is1	3M-Is2	3M-Is3	3M-Is4	3M-Ca1	3M-Ca2	3M-Ca3	3M-Ca4	3M-Co1	3M-Co2	3M-Co3	3M-Co4	3M-Cd1	3M-Cd2	3M-Cd3	3M-Cd4	3M-Dd1	3M-Dd2	3M-Dd3	3M-Dd4	21M-Te1	21M-Te2	21M-Te3	21M-Te4	21M-Ed2	21M-Ed3	21M-Ed1	21M-Ed4	21M-Is1	21M-Is2	21M-Is3	21M-Is4	21M-Ca1	21M-Ca2	21M-Ca3	21M-Ca4	21M-Co1	21M-Co2
Te	ENSMUSG00000022501	Prm1	protein_coding	4886.1	5182.77	5504.72	4907.91	26.8216	22.1325	78.2956	24.7131	33.2657	67.8623	17.6971	37.6087	33.2877	10.2466	33.785	39.6698	30.159	39.0129	39.0752	23.6703	79.9238	61.3166	45.7811	70.2354	0.42664	19.5322	11.6476	3.44003	1417.07	1502.12	1488.55	1589.75	4.98576	2.85239	4.33792	10.1039	1.73465	1.03412	0.261131	0.837336	4.63842	4.20283	4.29537	3.23088	8.26176	6.78439
Te	ENSMUSG00000038015	Prm2	protein_coding	4317.48	4177.49	4100.04	3467.69	24.2426	23.5426	105.926	24.3456	30.9329	40.8633	11.4995	35.456	61.4748	47.1941	53.2185	77.4816	91.8615	110.626	112.211	84.9766	244.827	184.224	154.418	237.716	2.57292	50.2435	24.3147	3.68267	645.459	673.194	708.622	679.574	7.94482	4.75063	3.65102	5.94542	44.6316	39.2512	60.2164	50.6683	7.20128	4.4806	9.01561	11.0137	10.3055	7.83003
Te	ENSMUSG00000030851	Ldhc	protein_coding	1707.58	1724.41	1768.6	1847.89	7.08611	2.75079	31.473	3.65974	5.66849	11.3447	4.00921	4.10702	2.85973	1.72605	2.8385	2.99705	4.88067	9.93686	9.61838	5.52307	10.1416	12.7826	8.87851	13.7395	0.292109	1.80866	0.641647	0.317059	622.49	644.601	633.728	636.926	2.49154	1.54062	1.13703	3.5614	0.665698	0.0930904	0.126936	0.46639	1.44836	1.96289	1.43801	1.71148	4.15336	2.21975
Te	ENSMUSG00000043050	Tnp2	protein_coding	2122.23	1607.11	1389.71	1489.9	3.73585	4.93759	17.479	4.03262	20.8995	24.4592	7.67032	6.67903	6.92005	12.5049	6.76615	5.25865	11.1255	17.2896	14.0181	12.2735	20.0309	18.9897	15.3164	23.7758	0	1.77801	0.457485	0.226058	616.379	625.064	616.797	658.022	3.78242	1.3346	2.11186	3.86796	1.38699	0.416857	0.449999	0.474657	4.14124	4.17066	4.42708	4.00106	7.41643	5.04889
Te	ENSMUSG00000026182	Tnp1	protein_coding	1700.4	1376.95	1153.87	1271.37	1.408	3.17718	5.4165	1.34104	12.0073	18.6983	5.58619	5.20809	2.44508	4.53841	2.78915	4.11065	4.41374	10.4317	10.2624	5.30822	12.9882	10.0519	7.62415	10.1274	0	0.687293	0.143684	0	566.582	625.779	615.158	636.627	2.87095	1.67742	2.4919	4.54447	0.974293	0.508987	0.483729	0.590098	5.00056	4.65934	5.56097	5.3378	9.38397	6.62009
Te	ENSMUSG00000004032	Gstm5	protein_coding	1239.85	1288.86	1365.27	1280.72	588.592	502.613	584.502	568.357	35.5949	45.2695	39.2773	34.4414	69.1175	22.6798	60.0774	65.3996	168.065	174.08	159.862	143.355	331.266	277.758	188.247	308.09	20.1388	42.9166	34.3807	17.1892	914.048	961.675	907.318	992.535	12.5792	7.22066	5.5159	13.8673	2.67521	0.551949	0.652277	0.854731	7.47353	6.74546	6.24118	7.24266	24.9517	15.3757
Te	ENSMUSG00000023930	Crisp2	protein_coding	1137.67	1198.56	1204.5	1215.45	3.66077	2.39083	16.8608	2.76218	4.81661	9.65592	2.80106	4.96795	5.73796	4.08454	7.78991	11.5998	16.8111	20.5841	17.9036	22.2766	50.4482	46.6762	29.3846	53.2551	0.974034	8.0935	5.58908	1.16511	1434.84	1342.65	1304.77	1116.47	2.33726	1.41941	4.99979	5.14218	3.43461	0.18011	0.16373	1.80473	1.96916	2.01514	1.55805	2.98671	8.50074	5.18094
Te	ENSMUSG00000038057	Dbil5	protein_coding	1005.58	1009.84	1007.72	862.449	5.29513	4.09666	17.0669	4.81918	6.02086	8.75307	3.88653	7.07285	18.595	14.5733	15.7839	23.9617	46.4772	51.2691	37.7368	35.553	84.3603	69.7589	50.8825	82.1515	0.229598	13.1822	8.75382	0.961233	724.884	843.16	889.07	815.139	37.9892	33.4087	32.5884	51.2905	24.9683	18.8247	19.8076	19.1732	64.1996	52.6864	59.5325	54.8238	77.3922	57.1123
Te	ENSMUSG00000030206	Gsg1	protein_coding	962.173	959.268	997.621	931.168	4.31483	3.75551	28.936	4.24662	4.5137	5.28933	2.65344	4.56641	10.6983	2.67462	5.90177	9.98775	13.6612	14.8017	18.3648	12.82	40.3416	32.899	26.5908	42.3891	0.374183	7.47708	3.03822	0.435154	833.675	909.199	899.374	978.202	23.917	18.4681	11.1519	18.3838	3.45236	3.13407	1.61877	1.94652	35.4633	27.1572	29.7082	32.3024	96.5476	59.0956
Te	ENSMUSG00000061923	Odf1	protein_coding	890.562	961.951	1024.03	915.765	8.90924	6.94064	25.9946	8.7802	6.20481	6.41218	3.36903	8.98245	38.9473	12.2877	27.3134	37.6805	91.291	85.9003	69.1453	64.9273	214.985	180.849	124.005	204.363	5.61351	47.8381	36.651	6.68262	5180.32	5460.18	5925.96	4665.73	35.389	26.1867	28.3246	38.5223	10.6676	2.18167	4.42419	6.87923	20.7474	17.9098	20.0134	20.2065	47.2769	27.9484
Te	ENSMUSG00000062859	Tcp11	protein_coding	903.62	953.857	993.81	914.151	24.8792	21.2276	48.2702	19.9217	4.19633	7.68982	3.87584	5.32148	14.4214	3.84476	9.771	11.9968	20.0917	18.1928	21.181	12.8612	48.2166	34.5688	28.3084	44.2748	1.17663	8.96954	5.75995	2.65852	635.998	669.729	700.138	679.432	132.099	124.368	154.415	163.962	117.786	98.3255	126.129	122.425	102.318	88.2318	97.9512	98.9516	124.547	110.24
Te	ENSMUSG00000026650	Meig1	protein_coding	992.231	956.554	974.616	841.717	13.7507	15.4519	24.9188	14.0191	6.54039	12.1404	3.71707	4.20873	0.840808	2.26896	4.02833	4.90708	5.37297	7.78379	7.21488	7.1972	5.1084	6.7197	3.97012	10.4742	0.188947	0.319066	0.266812	0.175787	940.236	953.72	982.028	825.648	12.93	11.773	22.4061	24.5721	4.42908	1.33781	0.608072	1.72641	1.96895	2.39871	2.68655	2.25061	7.81047	4.304
Te	ENSMUSG00000042293	Gm5617	protein_coding	783.178	897.159	1062.62	798.146	30.6424	33.4936	48.7932	26.7327	23.5843	23.3513	20.1132	29.1695	61.8204	13.5035	41.4265	37.5751	69.4999	51.5101	61.3096	41.397	88.0728	64.8563	53.5822	77.2269	40.4459	49.6336	46.708	45.3419	746.523	762.181	747.595	804.502	10.2962	6.38587	3.41907	7.09459	1.33061	0.540205	0.982152	1.42705	6.67847	5.57911	5.17377	5.72538	16.4133	8.79196
Te	ENSMUSG00000061099	Gapdhs	protein_coding	798.575	744.456	768.334	765.732	4.97378	3.9025	26.5641	3.75405	3.40929	6.00037	2.76453	4.51265	11.2448	3.50773	5.97538	7.48555	7.81053	11.8294	13.6421	7.84678	31.6921	24.6417	19.4916	27.9144	0.503555	5.97808	3.74929	0.425895	4467.18	4463.25	4279.95	4035.77	65.6359	51.9048	37.7334	76.5493	14.1964	7.35697	4.35244	5.10601	40.1682	51.056	34.2022	39.5717	184.122	97.5924
Te	ENSMUSG00000075706	Gpx4	protein_coding	632.53	744.869	807.887	674.3	140.305	126.583	141.577	119.563	95.0645	103.657	105.007	107.888	83.8214	30.5121	93.2737	88.7217	148.941	116.861	129.207	98.9157	179.807	180.181	152.915	168.12	72.3289	75.9169	70.2993	77.5818	932.241	956.563	929.698	931.468	15.1625	11.1031	10.3792	16.8632	2.36807	2.57392	1.60094	2.22125	15.9504	19.9371	14.3138	15.0415	65.9365	27.1754
Te	ENSMUSG00000030792	Dkkl1	protein_coding	637.406	743.015	764.581	684.614	4.40303	2.12905	19.8211	2.21017	32.8196	36.3036	23.2643	38.0203	4.4947	2.45637	3.99063	3.85268	8.89701	7.11975	9.68549	5.76822	9.15925	8.10488	11.0465	12.1403	17.5308	12.2857	15.0827	18.5241	1862.49	1616.69	1716.91	1555.18	6.27898	8.58677	8.11878	12.4432	1.93653	0.71683	0.781965	2.35072	3.25545	4.93549	3.98635	3.41105	20.7225	11.8293
Te	ENSMUSG00000050035	Fhl4	protein_coding	680.03	700.088	726.019	694	3.17514	1.71022	12.3546	2.56478	2.55007	5.76111	1.63247	2.65741	2.80927	1.34533	2.71267	4.03565	6.63346	8.82925	9.1138	7.66282	17.0141	13.8762	9.65361	17.8998	0.490139	3.06792	2.10407	0.474243	684.237	707.592	656.611	686.857	8.80403	6.07903	8.48771	10.4833	2.912	1.64047	1.52301	1.93947	17.9942	17.0926	16.2399	13.6395	54.8523	31.2832
Te	ENSMUSG00000040629	Mael	protein_coding	624.311	674.333	686.131	630.893	2.66834	1.25115	13.2411	1.34774	2.15142	5.67691	1.73235	2.16841	1.33396	0.721752	1.75049	1.93491	1.93907	3.95142	4.35465	2.22099	2.93694	4.08703	2.06411	3.47854	0.039443	0.399634	0.185659	0.293568	1037.49	1173.18	1137.59	1173.08	294.661	195.363	467.97	493.415	55.9556	31.614	18.3004	23.4355	93.2096	92.3211	88.151	75.4537	169.255	108.709
Te	ENSMUSG00000028141	Oaz3	protein_coding	627.639	698.514	652.529	590.444	3.82001	3.84086	14.2131	5.02439	3.4128	6.43626	2.46281	7.73784	15.5049	9.16715	18.9952	27.1132	42.3396	42.1484	34.3738	37.6451	89.5373	71.0882	43.1288	85.7831	0.946492	14.2182	7.26746	1.34838	1063.45	1128.04	1073.74	1119.27	3.24065	2.11361	5.10521	6.00069	2.52242	0.821014	0.597078	1.6952	14.9604	11.6825	9.94315	11.9967	23.8958	14.7502
Te	ENSMUSG00000050089	Akap4	protein_coding	648.959	628.84	628.463	630.747	2.28566	1.72894	13.4045	2.47872	2.89484	4.80429	1.53532	2.99256	4.36218	1.6665	3.97698	5.67015	4.38413	6.59406	7.71573	5.7772	14.4433	14.3854	13.6545	17.3385	0.309094	2.7589	1.84981	0.246486	955.858	932.48	951.31	983.177	43.4692	35.2972	18.281	24.7819	3.53041	1.6662	0.901585	1.69846	9.77564	9.52589	7.54996	8.9812	29.2269	16.5169
Ed	ENSMUSG00000050953	Gja1	protein_coding	15.9658	16.1336	15.6263	16.7214	570.696	555.888	581.155	597.453	219.674	210.285	225.599	190.084	62.0627	32.5402	82.6363	71.3646	5.75319	5.4274	6.70546	4.89961	15.1267	14.262	9.8454	15.1253	8.54093	7.7423	8.15347	7.61102	15.7142	17.8997	17.567	16.6325	431.769	394.498	356.394	361.275	230.262	194.23	195.515	203.402	65.2239	52.0806	63.6525	64.9189	4.95517	4.70335
Ed	ENSMUSG00000018623	Mmp7	protein_coding	0	0	0	0	529.005	490.729	509.809	627.615	45.1349	54.3052	46.1147	47.9481	8.05932	3.85686	7.49966	9.01061	2.408	3.56674	4.4065	2.22371	194.476	202.853	67.4432	158.097	1.81109	3.86683	1.4698	1.27824	0	0	0	0	346.318	281.508	474.297	486.458	77.3535	50.4084	45.5561	48.335	11.5902	8.62603	11.5664	12.8585	3.85874	3.45881
Ed	ENSMUSG00000036256	Igfbp7	protein_coding	19.824	23.5182	24.4135	23.1545	448.082	441.817	386.772	441.805	116.487	117.282	157.252	136.925	71.9258	40.3649	94.655	69.3415	72.5981	67.1828	84.4336	48.2348	99.6231	97.7618	142.04	83.8916	68.3656	74.6488	71.1094	73.8947	21.2938	29.4551	23.8551	25.4506	400.732	358.419	509.448	631.819	133.989	99.5655	114.837	114.536	63.0499	59.2722	59.8597	66.9147	51.6109	45.1325
Ed	ENSMUSG00000063524	Eno1	protein_coding	88.935	100.948	103.992	98.4325	462.002	394.312	430.044	407.04	39.589	43.6097	53.1408	43.1034	67.3266	16.8215	55.5211	52.0651	64.4204	42.1449	57.7154	32.9695	101.563	89.9487	135.852	83.5204	53.7665	65.3814	56.5015	58.6549	83.6311	94.0924	97.8827	96.0782	422.857	382.389	395.03	500.955	52.4806	33.5101	39.4283	40.818	61.7529	62.4595	64.1089	73.041	46.5327	38.5644
Ed	ENSMUSG00000061780	Cfd	protein_coding	0	0.166657	0	0	296.006	416.198	249.648	371.056	2.65584	0.309874	3.44199	1.50851	1.93149	2.31653	7.42823	1.25249	17.1542	41.1122	77.7651	15.6946	19.2376	5.20898	1.08982	0.972167	81.4556	17.3465	46.9221	39.7758	0	0	0	0	125.872	114.57	123.796	76.1394	1.22093	0.597565	0.155206	1.16643	1.29229	0.587763	0.0527478	0.307741	11.7725	10.404
Ed	ENSMUSG00000027559	Car3	protein_coding	0	0.152529	0	0	275.907	360.623	249.53	387.354	4.29192	0.578555	5.67036	2.40983	1.48491	1.59012	12.0645	1.52842	16.7339	52.3307	93.6842	23.9805	30.7414	11.6859	1.73239	1.53483	98.2794	18.9618	60.2094	40.2845	0.0302562	0	0	0	180.065	73.4437	126.904	56.2654	1.04293	0.515656	0.0426145	0.768638	1.81354	0.524488	0.115863	0.40558	13.4134	11.3555
Ed	ENSMUSG00000031785	Adgrg1	protein_coding	9.15897	8.99455	9.78844	10.2344	298.648	304.047	267.888	304.2	56.9412	55.0549	61.046	57.9579	155.265	50.3331	94.8301	84.0622	42.4238	38.8568	41.5094	24.3467	36.0856	31.9895	21.5577	30.5204	57.8628	62.0878	59.4211	60.1309	8.8788	10.2445	9.46819	8.68389	288.64	273.946	130.659	153.248	44.2751	38.788	31.402	34.9165	96.9846	88.365	90.7977	94.2234	58.0602	44.6856
Ed	ENSMUSG00000079018	Ly6c1	protein_coding	2.32727	2.73089	3.87113	3.64233	268.604	288.355	278.784	293.943	33.4062	33.8512	36.227	27.8649	15.3326	8.40528	15.7481	16.9511	25.824	27.5981	25.6496	20.9406	73.0637	74.8076	49.8147	55.822	21.1	25.0882	23.7322	21.6891	2.58816	3.53567	3.63178	3.5676	282.271	228.784	290.665	262.308	59.9452	28.7228	30.858	29.3923	17.5681	13.3232	16.1343	17.2797	25.8585	24.9901
Ed	ENSMUSG00000032285	Dnaja4	protein_coding	44.5504	46.2219	40.0017	44.6681	274.716	265.387	301.354	244.392	39.7455	46.7516	44.1816	33.0523	15.9126	7.849	15.2302	14.1642	2.67622	2.82811	2.30463	1.87597	3.09104	3.47164	2.76488	3.07808	7.75146	7.97625	7.84088	7.25294	51.0201	44.0315	46.6417	39.9461	221.758	196.04	217.137	246.459	43.0044	33.9416	26.852	29.0798	15.2976	12.3163	13.7819	14.853	3.13125	2.26181
Ed	ENSMUSG00000032281	Acsbg1	protein_coding	52.8375	57.4262	56.5526	58.8305	293.974	261.202	279.306	239.546	18.851	20.9119	23.6912	14.7075	24.1154	8.84638	15.8403	15.7716	11.6755	13.9856	10.8426	7.57505	7.36991	7.54485	3.37876	5.77718	2.29275	2.29432	3.61913	2.26235	53.9047	65.5988	58.3749	58.7349	223.915	200.019	164.08	196.312	27.1435	16.4248	12.1982	14.1402	17.0312	14.6534	14.0159	14.6401	16.204	8.35787
Ed	ENSMUSG00000004655	Aqp1	protein_coding	0.103848	0.155978	0.0621856	0.270047	283.796	261.241	268.264	241.473	27.8838	29.8429	29.2252	24.571	8.15734	3.01985	4.75021	6.03214	10.1323	8.34373	7.79807	2.64906	14.764	15.8964	16.8298	13.6694	46.7166	47.4473	53.7071	47.7149	0.0966886	0.0979254	0.197765	0.143274	276.851	247.31	225.627	248.682	31.1622	19.295	13.8088	16.43	10.0538	7.63264	7.22004	9.39671	6.54018	5.39788
Ed	ENSMUSG00000026576	Atp1b1	protein_coding	12.4349	11.5938	12.3893	14.0004	261.354	259.465	246	278.429	28.4731	33.1328	30.8457	26.9054	34.3742	14.2508	30.9776	34.1168	87.1949	81.0846	85.3886	62.2309	25.0473	24.1314	19.6371	26.6643	34.2797	32.1302	36.8221	32.7582	11.7352	12.9423	13.0486	12.5877	226.817	223.229	213.681	229.452	40.7955	26.9376	21.1876	26.0943	41.1019	36.758	32.7051	35.9841	108.732	70.0421
Ed	ENSMUSG00000033880	Lgals3bp	protein_coding	3.06762	4.11074	3.80943	3.37454	275.753	266.307	252.214	232.709	21.0187	20.7227	28.0524	19.346	33.2727	20.887	33.6039	29.7924	11.9205	13.4007	19.1525	9.00758	20.8582	18.8025	104.385	16.6621	8.84537	10.0868	10.4021	10.7328	3.2922	4.37215	3.63448	3.32305	205.372	241.617	180.682	185.943	31.4035	22.4301	21.4342	17.4165	39.7449	32.0092	27.3642	38.0671	13.1783	10.2796
Ed	ENSMUSG00000034227	Foxj1	protein_coding	21.0508	29.2515	30.7873	25.1752	227.617	230.484	209.09	210.537	10.1623	9.06236	11.1448	6.50763	1.40312	0.756113	0.508936	0.440259	0.0735343	0.238076	0.358836	0.126338	0.293025	0.178633	0.262106	0.491226	0.0508564	0.0858789	0.119691	0.0946289	31.1425	32.0116	29.9675	26.5462	340.696	349.892	236.5	265.167	26.0359	11.0425	4.60996	6.1228	1.2618	0.232427	0.852894	1.16827	0.708125	0.340722
Ed	ENSMUSG00000027070	Lrp2	protein_coding	0.197635	0.238538	0.193723	0.252379	206.005	180.907	196.451	194.856	8.79282	9.34729	11.3216	5.35288	6.72707	1.69731	2.99966	3.43187	56.2215	58.6059	67.958	44.6776	115.884	109.925	62.73	110.336	17.0067	15.1193	18.1912	15.6096	0.230014	0.286203	0.174745	0.146073	121.235	107.185	105.673	113.397	12.4228	4.62778	2.11965	2.83819	6.28973	8.04463	2.57009	3.63389	59.2381	52.455
Ed	ENSMUSG00000070306	Ccdc153	protein_coding	0.351362	0.612559	0.551051	0.543862	187.299	213.857	193.45	169.946	9.84751	10.7238	12.8009	5.81605	1.14681	0.701749	0.106791	0	0	0	0	0	0	0	0	0	0.0613598	0	0.173293	0	0.32714	0.757314	0.430153	0.296792	168.605	148.194	253.908	265.274	23.2434	8.83382	4.01521	5.67243	0.669858	0.062318	0.536892	0.730878	0	0
Ed	ENSMUSG00000042096	Dao	protein_coding	0.0530496	0	0.0264725	0.0287398	178.377	177.037	170.678	173.977	7.89075	8.44473	10.7698	7.71431	11.6587	5.63665	9.3678	7.64128	1.53154	2.39831	1.6688	1.18141	4.77127	3.41677	2.59669	3.486	0.291825	0.36503	0.244199	0.0905001	0.172874	0	0.0252567	0	150.793	146.672	119.687	141.055	17.0864	6.65784	3.54792	3.62493	7.3692	7.11316	6.71459	6.04166	4.17624	1.44825
Ed	ENSMUSG00000005125	Ndrg1	protein_coding	3.4362	3.61787	4.39773	3.81076	171.092	166.554	173.908	174.631	28.7003	29.9887	29.4821	35.662	27.5767	15.5612	30.3894	21.9133	13.1795	11.999	11.5272	8.48444	17.3326	15.2173	25.7176	13.6006	13.5241	12.4619	13.6466	10.3907	3.60081	3.46897	3.78516	3.50579	169.232	126.844	118.521	121.098	37.7023	26.9228	20.4983	23.0903	28.1027	27.3702	27.4457	25.1572	10.9953	9.56472
Ed	ENSMUSG00000025479	Cyp2e1	protein_coding	0	0	0	0	142.812	146.767	135.799	260.14	4.50385	5.33065	6.99188	3.00064	0.485769	0.665839	2.24817	0.560005	3.19188	9.23251	19.8147	7.5027	4.1609	0.862722	0.230813	0.397313	46.6487	21.547	38.7426	23.2233	0	0.0280688	0	0	50.9158	33.7382	54.3068	45.5557	7.02834	2.66224	1.09296	1.95572	0.469462	0.0739113	0.132661	0.24767	1.48831	1.13766
Ed	ENSMUSG00000001270	Ckb	protein_coding	1.0378	1.94846	1.30428	1.58258	177.622	175.571	168.688	162.661	10.5227	11.5731	15.5421	14.8977	34.751	15.4764	29.2556	28.6316	8.65097	7.34673	7.11825	3.85195	34.716	43.1172	56.089	32.776	104.828	89.3689	119.586	124.718	0.984154	1.01486	1.11628	0.890149	222.157	183.419	213.088	252.939	17.7769	9.17658	7.30871	8.66221	35.5103	30.2073	32.2225	29.8629	5.31577	4.09238
Is	ENSMUSG00000036449	Lcn8	protein_coding	0.0838118	0.314712	0.167293	0	0.420068	0.20312	0	0	12811.5	11194.1	13142.8	10424.2	857.224	310.393	1559.17	738.331	2.27151	0.287775	0.255144	0	2.08885	0.629777	1.7872	1.80713	0.307365	0.461363	0.675159	0.381278	0	0.0790323	0	0	712.005	235.44	0.134249	0.414218	10312.8	10277.1	12881.8	12554.1	1362.11	808.506	1235.86	1632.6	0.0891615	0.091522
Is	ENSMUSG00000074678	Defb25	protein_coding	0	0.17481	0	0	1.16666	1.3539	0.436678	0.44447	8161.96	7399.44	9208.93	8402.71	579.428	178.334	1845.03	655.788	2.41375	0	0	0.188501	1.21072	0.199895	0.541485	1.33839	0	0.512538	0	0	0.346759	0	0	0	337.265	170.63	0.298281	0.920328	7733.87	7658.04	9772.04	9111.86	1262.66	1138.4	1014.5	1518.04	0.396206	0
Is	ENSMUSG00000027446	9230104L09Rik	protein_coding	16.5913	20.6117	16.8881	23.8797	0.103428	0.100024	0	0.197019	6752.17	8492.28	6693.81	7432.08	435.733	230.802	1184.96	543.915	1.84807	0	0.335046	0	0	0	0.880083	0.847521	2.72443	3.63506	1.99483	4.03673	17.83	22.6505	16.1911	19.36	259.401	88.4909	0	0.135984	7430.74	8273.26	7971.36	8323.13	1077.63	909.413	962.001	1412.51	0.175625	0
Is	ENSMUSG00000023210	Lcn9	protein_coding	0	0.0610481	0	0.140925	0.325941	0	0	0	7299.27	7709.85	7281.08	5942.65	388.217	139.195	908.8	394.339	1.68588	0	0	0	0.140938	0.349042	0.5673	1.20188	0	0	0	0	0.0605485	0.061323	0.0619225	0.0640867	309.519	121.395	0.312502	0.214268	5810.28	6315.21	6310.03	6882.9	767.11	590.118	646.785	1013.07	0.138365	0.0710141
Is	ENSMUSG00000049560	Defb20	protein_coding	0.474448	0.148462	0.473512	0.085678	1.28806	1.14984	0.927149	0.377478	3509.98	4046.4	4070.82	6184.97	1082.78	486.203	2427.37	846.482	20.313	18.1912	11.314	10.9661	5.22686	4.24415	4.44541	5.11497	0.096664	0.108821	0	0	0.441741	0.372826	0.0752941	0.0779258	142.568	48.1842	0.633306	0.781612	4659.49	4627.23	4618.9	4706.02	2853.64	3033.46	2433.3	2614.25	12.9548	6.64888
Is	ENSMUSG00000036958	Cst11	protein_coding	0.443589	0	0	0	0.222329	0	0	0	3989.79	4519.33	4295.06	4414.43	288.118	433.618	1519.54	514.809	0.836338	0	0	0	0.192271	0	0.171984	0.273274	0	0	0	0	0.165204	0.0836586	0.168953	0.0874289	59.0616	31.0645	0	0	5134.57	4841.75	5166.24	4873.87	647.949	887.995	661.732	770.105	0.188761	0
Is	ENSMUSG00000075574	Defb48	protein_coding	0	0	0.122368	0.531396	0.153632	0.148574	0.14376	0.585302	4719.87	3497.02	4111.85	3042.96	207.43	92.0504	323.203	197.657	34.8196	31.9954	41.4314	27.8015	35.7398	34.4834	20.6786	31.5984	40.9182	38.4714	51.2195	41.694	0	0.115618	0.700489	0.120829	136.567	56.7313	0	0	3511.3	3397	4105.67	3640.43	287.535	135.175	341.199	344.055	37.3048	31.8657
Is	ENSMUSG00000026822	Lcn2	protein_coding	106.701	108.59	105.856	120.559	573.648	612.122	485.526	553.477	3685.71	3383.78	3660.19	3857.04	704.729	544.62	1359.95	752.964	55.5432	43.5404	54.7216	39.3127	91.3101	75.1937	37.72	56.3065	16.0192	35.6307	21.8439	23.6199	94.0211	127.764	92.7515	88.3232	637.806	462.592	568.648	656.216	3931.92	3532.69	4368.34	3818.04	811.914	1005.54	869.952	935.383	49.0883	38.6365
Is	ENSMUSG00000030605	Mfge8	protein_coding	18.1481	21.5429	22.7164	21.3382	50.7904	45.458	45.0009	47.2852	2864.98	2942.04	3119.16	3181.64	546.478	181.599	860.375	343.962	66.6942	55.8809	62.5663	43.0705	23.827	24.8102	341.415	19.7396	36.183	35.4487	43.1174	41.919	17.6602	23.296	20.5805	21.646	266.469	154.192	43.9607	50.1121	2619	2502.57	2770.76	2634.44	667.311	799.183	554.902	792.881	60.6349	43.3943
Is	ENSMUSG00000034482	Ly6g5c	protein_coding	0	0	0	0.116145	0.134314	0	0.251368	0.127927	2834.65	2791.37	3081.91	3149.59	319.78	272.9	952.372	353.171	0.505253	0.736117	0.217549	0.217017	0.232312	0	0.311699	0.440245	0.52415	0.590073	0.123359	0.731469	0	0.101081	0	0.105636	127.547	50.4512	0.171702	0	3731.55	3235.53	3640.61	3134.1	464.399	483.627	448.498	578.289	0.684214	0.117055
Is	ENSMUSG00000086056	Gm4846	protein_coding	1.37655	0.79296	0.874259	0.745752	0.0392007	0	0	0	3170.37	3295.92	3046.27	2309.68	203.815	73.8308	313.7	196.624	0.700445	0	0.126987	0	0	0.0335833	0.272916	0.2891	0	0.0861087	0	0	1.07776	0.678527	0.804317	0.43163	160.506	52.2829	0	0	2593.42	3008.41	2986.18	3084.94	329.49	148.181	366.843	459.772	0	0
Is	ENSMUSG00000021872	Rnase10	protein_coding	2.91397	2.51538	2.03909	2.90327	0.125904	0.0405866	0.078543	0.0799446	2589.42	2940.52	2973.9	2511.59	207.527	59.8909	432.688	157.455	0.710425	0	0.0339879	0	2.39543	1.94152	0.746688	2.029	0.941717	0.783594	1.07926	0.495204	2.08939	2.65304	3.12547	3.00366	133.198	52.8515	0.214601	0.165535	2267.28	2358.87	2761.19	2609.52	433.411	322.938	401.846	502.715	0.106895	0
Is	ENSMUSG00000043807	Ly6g5b	protein_coding	0.695937	1.39372	0.879782	0.301622	1.80217	1.01197	1.41438	1.1074	2043.72	2002.41	2316.1	1738.29	176.064	32.6266	256.89	116.8	0.929413	0.477912	0.847444	0.563579	0.955226	1.09568	1.07929	1.33384	0.907457	0.766191	1.33482	0.580427	0.863949	0.65625	0.839376	0.868713	155.737	51.9538	1.11475	0.764332	1660.25	1654.94	2325.73	2299.66	261.456	158.174	280.18	358.098	0.987145	0.911952
Is	ENSMUSG00000027442	Cst8	protein_coding	162.327	170.285	158.688	161.545	0.510194	0.0822333	1.2731	0.242966	1870.19	1997.94	1964.77	1667.4	105.211	42.6941	246.457	108.841	0.959604	0.543695	0.619772	0.618254	1.25012	0.874167	0.723551	1.18453	0.331831	0.0933915	0.0780967	0	138.311	138.608	145.778	157.026	73.7611	34.7944	0.217404	0.670786	1700.52	1843.57	2022.71	2228.49	245.099	168.085	233.792	303.571	1.01072	0.222317
Is	ENSMUSG00000047053	Teddm1a	protein_coding	0	0	0	0	1.09012	1.25504	1.06865	0.840511	1613.65	1881.31	1937.41	1984.99	164.922	62.4373	406.727	111.602	0.341727	0	0.126119	0.0419368	0.0897851	0.133415	0.200778	0.255222	0	0	0	0	0	0	0	0	95.6333	43.5657	0.19908	0.819001	1690.96	1579.66	1907.99	1829.11	438.882	426.858	351.476	516.716	0.088146	0.0452398
Is	ENSMUSG00000059430	Actg2	protein_coding	145.429	151.814	148.41	145.378	10.4626	9.42382	11.3261	9.28119	1590.4	1468	1696.41	1217.55	134.264	38.2831	183.397	98.8564	13.8909	19.1136	14.7865	9.81971	212.41	292.758	255.935	202.777	1106.1	870.398	1299.23	1300.23	136.623	133.044	133.526	147.188	105.021	36.5747	7.212	8.09171	1104.3	1154.22	1405.98	1320.39	138.645	91.0141	150.133	183.227	12.6278	6.83861
Is	ENSMUSG00000014725	Adam28	protein_coding	0.0440842	0	0.0146657	0.0318437	0.0552378	0	0	0	1387.06	1490.55	1550.07	982.581	77.3788	25.9677	152.551	77.4083	0.363631	0.0504556	0.0745574	0.0297499	0.0318467	0.0315482	0.071216	0.105615	0.179634	0.121336	0.135286	0.0668494	0.0273634	0.0138567	0.0139922	0.0144812	42.3799	18.727	0.0470758	0	974.191	1095.76	1100.05	1182.25	104.773	43.4023	108.086	135.503	0.265756	0.144419
Is	ENSMUSG00000075573	Defb47	protein_coding	0.303964	0.142672	0	0.329347	3.99913	3.13082	2.85118	0.544136	658.504	1180.7	879.737	2386.88	246.538	154.685	1078.04	165.482	1.43272	0.695791	0.616895	0.461538	0.823447	0.489436	0.441936	1.71652	0.557366	0	0	0.172849	0	0	0.434147	0.149774	12.8028	11.9218	1.46066	1.50226	1582.1	1371.58	596.115	693.203	719.838	1178.75	372.541	731.236	2.26356	0.331927
Is	ENSMUSG00000048236	Ovch2	protein_coding	0.0838118	0	0.0278822	0	0.105017	0.135413	0.0982692	0.100023	1286.73	1413.63	1220.02	1047.69	90.2421	45.151	170.17	113.364	0.790089	1.56678	0.708734	0.791838	0.302732	0.389862	0.379104	0.516324	0.102455	0	0.225053	0.158866	0	0	0	0	52.3961	17.1824	0.0447498	0.184097	1187.37	1229.34	1310.1	1239.52	130.253	74.2257	156.085	164.024	2.52624	1.37283
Is	ENSMUSG00000047356	Lcn10	protein_coding	0	0	0	0	0.0618138	0	0	0	1111.49	1104.17	1171.14	1169.58	193.916	82.4184	319.645	100.236	0.232526	0	0	0	0	0	0.191266	0.25326	0	0	0	0	0	0	0	0	62.5088	28.7146	0	0.0812707	911.56	901.583	1081.85	1048.1	331.509	376.733	310.313	339.356	0.0524811	0
Ca	ENSMUSG00000022037	Clu	protein_coding	356.73	389.352	399.739	377.701	96.3168	119.848	85.4273	108.861	244.443	289.998	218.525	659.344	8477.38	4769.45	8338.46	9789.25	86.6364	120.858	117.738	60.6317	2126.09	1965.5	577.148	1230.02	592.397	1328.37	874.721	723.071	383.78	430.247	386.289	373.203	119.032	120.492	84.0646	78.8111	221.2	313.179	253.389	325.013	6147.2	5830.89	7116.45	6212.81	188.435	86.3099
Ca	ENSMUSG00000026937	Lcn5	protein_coding	0	0	0	0	4.42022	0	0	0.0935559	36.0869	47.371	35.4249	68.2163	6752.91	3934.02	5825.02	8014.28	14.0411	18.3035	4.45476	0.555481	0.33979	0.168302	9.11811	4.50745	1.91661	1.40248	2.3456	2.40723	0	0.0739225	0	0	5.87001	5.43637	0	0	33.2461	58.0131	29.2984	48.416	7263	6964.34	8064.91	6678.75	18.0137	1.8833
Ca	ENSMUSG00000031170	Slc38a5	protein_coding	6.98871	7.82626	7.19461	7.87045	11.3771	6.8016	7.09739	7.35539	207.806	362.555	267.968	959.337	2590.51	807.115	2253.23	2235.67	7.87863	3.9679	5.44449	2.33958	3.3393	3.54428	5.22716	4.20935	2.85897	3.25641	4.21132	5.22584	4.45751	5.05938	5.00404	5.93815	19.1541	15.3272	4.27506	7.16182	306.196	354.999	230.886	264.407	2016.63	2016.24	2282.02	1869.86	2.34167	2.8844
Ca	ENSMUSG00000026473	Glul	protein_coding	165.267	164.775	153.083	163.633	2424.45	2396.52	2504.92	2279.86	344.55	412.02	376.382	590.563	2017.96	1032.49	1972.95	2263.48	175.748	183.808	173.238	120.194	193.994	195.51	182.957	191.479	86.5499	100.797	90.7213	85.7228	170.523	177.274	167.135	167.681	1701.7	1651.01	1411.96	1622.41	507.073	472.078	326.741	395	1914.41	1816.62	2096.1	1791.18	170.203	143.169
Ca	ENSMUSG00000052382	Rnase9	protein_coding	0	0	0	0	0.574988	0	0	0.0547644	3.47164	5.76694	3.285	3.88149	1301.9	1226.71	1761.92	2747.9	454.867	512.866	444.793	462.702	30.5811	18.0781	21.9724	25.0658	0.056096	0.126302	0.264044	0	0	0	0	0	0.805336	0.678188	0	0	5.41756	5.03095	4.75394	5.36671	1362.57	1235.44	1573.66	1288.15	468.014	286.329
Ca	ENSMUSG00000053367	Epp13	protein_coding	0	0	0	0	10.6442	8.29035	7.01901	6.12366	37.2109	29.675	24.0418	20.2147	1790.82	598.683	1275.87	1694.46	2.08265	8.80917	1.15708	0.0577123	0	0	0.773657	0.819536	0	0	0.0656111	0	0	0.0537618	0	0	20.8785	13.2871	10.1369	9.86203	29.0148	36.7632	49.569	67.6513	1039.05	883.376	810.761	768.552	17.2252	4.04677
Ca	ENSMUSG00000013643	Lypd8	protein_coding	0.760907	1.13447	0.670064	0.921443	1.45818	0.0542375	0.10496	0.106833	1.03308	108.047	29.9889	540.2	1665.03	842.586	1441.79	958.176	2.5844	0	0.0908389	0.0453082	1.21254	1.82578	2.08243	2.34379	0.437724	0.184791	0.566602	0.203619	0.958495	1.18179	0.554051	0.705743	4.45126	5.39375	0	0.811107	28.935	173.945	29.6412	105.869	2120.38	2169.28	1945.98	1319.9	0.190465	0
Ca	ENSMUSG00000031367	Ap1s2	protein_coding	4.53684	3.25024	3.88105	4.13954	73.0677	58.8819	77.9118	73.9896	305.962	414.865	331.72	494.677	525.287	409.323	1160.02	1268.69	3.55735	3.80657	3.53071	2.60701	2.56898	2.41674	8.86101	3.36232	2.77301	3.2626	3.29749	2.83205	3.73181	4.06904	3.80025	4.11796	33.1654	35.5222	25.708	31.2168	324.286	376.956	188.593	291.494	873.622	765.126	925.131	765.461	2.32249	1.30374
Ca	ENSMUSG00000078934	9230113P08Rik	protein_coding	0.247133	0.0773317	0.0822152	0.208266	0.275253	0	0.0321959	0.0327705	2.64076	8.8285	4.14641	21.9219	309.024	392.188	872.57	1439.22	1.65021	1.75996	1.89477	2.58503	1.60678	1.68014	2.28893	1.71982	0.268538	0.37789	0.284403	0.281065	0.102265	0.181253	0.130732	0.487085	0.096381	0.218519	0	0	10.7955	11.012	6.66166	8.19083	578.557	543.861	829.388	589.123	1.25611	1.04949
Ca	ENSMUSG00000068392	Rnase13	protein_coding	0	0	0.0385651	0	0.435761	0.0936481	0.0906137	0	0.346839	1.41638	0.345774	1.88049	680.424	626.61	532.932	773.502	1.00174	0.132678	0	0	0	0.0414796	0.299632	0.55545	0	0	0.0444687	0.13184	0	0	0	0	0.497308	0.702868	0	0.0636582	0.620071	0.836132	0.76009	1.67563	370.912	381.252	504.452	405.913	0.0411077	0
Ca	ENSMUSG00000075571	Defb30	protein_coding	5.07549	5.48964	4.79018	4.8418	0.345632	0	0.0646848	0	21.0099	31.3148	24.8066	30.3637	592.11	262.314	659.87	984.519	2.40532	3.97793	2.35125	1.00521	0.717373	0.177662	1.22988	1.0196	41.2058	26.269	42.791	41.9751	4.41741	2.70516	3.72969	4.51244	1.8073	0.815334	0	0.0908851	29.5304	29.9233	32.2661	32.5499	799.751	596.917	717.799	661.117	7.80573	3.67485
Ca	ENSMUSG00000048500	Defb15	protein_coding	4.58633	5.04771	2.84107	2.22763	0.396325	0	0	0	0.811158	2.98126	2.47654	14.1101	587.416	330.768	568.128	698.459	4.65895	3.43912	2.56771	3.36187	3.0847	3.22555	3.83225	3.57236	0	0	0	0	3.38668	2.68435	4.36706	5.29895	1.1102	0.359583	0	0	0.725085	1.36883	0.829563	2.28599	635.464	738.657	819.157	532.768	2.18717	4.14475
Ca	ENSMUSG00000043787	Defb12	protein_coding	0	0	0.108582	0	0.408969	0	0	0	50.571	49.3359	53.3624	48.1559	389.013	227.319	421.621	623.902	0.961518	0.186781	0.110401	0	0	0	0.474541	0.279268	0	0	0	0	0	0	0	0	4.26424	1.17501	0	0	42.7732	47.2404	38.0933	46.7495	379.808	361.526	499.96	386.313	0.115741	0
Ca	ENSMUSG00000020681	Ace	protein_coding	133.757	129.218	128.221	131.816	121.194	117.973	119.197	95.8407	36.5499	44.7832	39.5209	63.7488	511.357	239.133	406.653	484.907	24.9783	23.37	23.7784	13.8471	9.77357	10.0401	15.0807	9.51194	16.6813	11.4635	17.1885	15.1654	132.665	127.828	126.165	129.359	125.864	127.761	85.6149	100.75	48.0066	46.6055	39.5668	42.7901	393.481	361.646	431.654	417.278	35.7659	25.4548
Ca	ENSMUSG00000017310	Spint4	protein_coding	0	0	0	0	0.182067	0	0	0	0	0.380431	0.162528	0	604.044	83.9996	212.842	583.978	12.756	93.3798	24.6236	4.92737	0	0	0.492936	0.895145	0	0	0	0	0	0	0	0	0.340007	0.247782	0	0	0	0	0	0.0954685	1058.93	692.37	661.376	961.458	121.421	14.439
Ca	ENSMUSG00000003746	Man1a	protein_coding	0.392987	0.518475	0.551217	0.621445	26.484	26.5904	27.273	26.8851	232.945	300.921	313.01	257.571	357.911	175.621	376.288	453.21	5.70719	5.03273	6.52066	5.01022	7.99899	7.17151	14.4335	7.59017	11.0623	11.3573	10.4996	10.3643	0.385674	0.620966	0.43488	0.366344	34.534	30.0783	23.9034	24.7417	210.966	229.581	215.945	225.209	339.565	303.912	427.571	385.037	3.46886	3.44472
Ca	ENSMUSG00000022885	St6gal1	protein_coding	3.34198	3.53511	3.4079	3.8441	5.17373	5.15015	4.91228	6.05485	27.2801	32.1211	28.4829	39.3128	403.183	171.216	319.624	414.149	7.07714	9.04972	5.88559	5.03769	23.0406	20.043	16.5016	20.8743	6.88296	6.36554	6.93948	6.62394	3.02141	3.19707	3.07844	3.34116	7.46599	4.41878	3.06449	2.8725	28.4241	31.9478	27.0098	28.8156	341.533	300.364	371.767	338.067	5.13973	5.36836
Ca	ENSMUSG00000031551	Ido1	protein_coding	0.131791	0.123718	0.131531	0.107098	0.412838	0.558948	0.695362	0.0393206	22.3913	37.8868	21.1169	45.8883	299.888	248.371	309.481	426.115	9.70614	10.4456	14.1425	8.9383	52.3757	54.6434	31.648	51.488	4.18877	6.30257	4.3604	3.5598	0.0306765	0.124275	0.0627451	0.0974072	1.96597	1.94774	0.158327	0.922736	43.203	51.1411	27.9113	33.6837	304.669	276.685	329.979	309.472	11.4616	10.4698
Ca	ENSMUSG00000056544	Defb21	protein_coding	2.93891	3.11874	3.18816	3.32278	0.320216	0	0	0	74.0586	86.9825	87.6132	38.0507	299.586	186.145	310.593	461.559	0.752851	1.16997	0.907645	1.03477	0.415387	0.548658	0.743115	1.04958	0	0	0	0	2.02249	2.28935	1.58171	2.89621	1.79399	2.76003	0	0	46.7209	43.5013	37.1992	50.3725	454.833	393.905	407.975	365.071	1.22341	0.139534
Ca	ENSMUSG00000043282	Teddm1b	protein_coding	0.0215914	0.0202688	0.0646464	0	2.21845	1.80529	2.32906	1.98411	22.3703	102.569	39.1968	247.503	340.028	159.352	414.486	341.139	0.559738	0	0	0	0	0.0463547	0.167424	0.22169	0	0	0.0248476	0	0.120618	0	0.0205591	0.0212777	1.5157	1.81641	0.726285	1.03153	110.451	97.614	29.2485	46.8711	363.4	398.477	360.604	323.979	0	0.0471554
Co	ENSMUSG00000018339	Gpx3	protein_coding	2.73834	2.92407	3.00624	2.26235	1495.52	1638.54	1231.55	1500.26	90.9423	94.2071	103.604	96.6947	702.762	253.151	402.9	519.201	5121.78	4938.35	4647.16	3574.02	5834.27	5233.97	2795.77	5212.18	501.408	561.408	468.993	506.623	2.23088	2.8404	2.93335	3.50813	1910.44	2150.71	1602.96	1938.01	191.186	91.151	57.7246	87.3047	594.086	680.456	361.12	454.229	5122.92	3978.61
Co	ENSMUSG00000040205	Cuzd1	protein_coding	2.12829	2.38388	2.41373	1.99156	252.766	226.364	208.764	205.591	382.715	545.447	408.889	668.607	995.508	385.391	1014.51	1092.92	3195.27	3082.81	3312.7	2744.99	2034.36	1803.44	1178.99	1784.73	63.4164	100.748	84.9165	57.2669	2.11668	2.55426	1.88836	2.88387	179.313	175.086	176.032	228.14	600.299	622.86	598.468	609.106	1259.27	1311.92	1098.22	1058.08	2763.58	1938.62
Co	ENSMUSG00000027468	Defb22	protein_coding	0.0868814	0.163119	0	0	0.108863	0	0	0	0	0.181977	0.38872	0	87.8127	0.850256	0.277265	8.88779	1901.27	1905.14	1525.66	1489.56	4.70728	3.26421	5.22113	3.83584	0	0	0	0	0	0	0.0827276	0.0856191	0.10165	0	0	0	0.398335	0.375993	0.341798	0.114167	76.2076	185.205	5.42093	15.0001	2070.83	1101.2
Co	ENSMUSG00000029819	Npy	protein_coding	0.0963984	0.0904936	0	0	0	0.116812	0.452108	0.345132	0	0	0	0.223394	29.0512	11.0512	8.3062	19.8361	1854.29	1662.35	1328.79	1342.71	134.647	72.3319	165.382	156.681	0.117841	1.0613	0.221872	0.438537	0.179506	0.363604	0.183579	0.0949978	0.338355	0.767132	0.308821	1.42927	0.331477	0.13906	0.379239	0.126673	29.0038	61.5162	11.8576	19.0495	1676	1356.67
Co	ENSMUSG00000070530	Wfdc16	protein_coding	0.0977805	0.0458955	0.0975876	0.105946	4.77827	3.67309	2.92351	2.97568	5.26599	7.2194	5.24981	9.85695	45.691	7.79206	13.7821	14.6592	1080.95	1119.24	1079.69	900.469	625.617	582.333	391.046	591.184	15.539	14.6675	11.2526	10.1197	0.364159	0	0.139658	0.14454	5.7201	6.28062	5.40353	7.89316	4.31494	6.20636	3.97499	4.68985	46.2647	89.227	14.5552	17.9497	912.531	660.781
Co	ENSMUSG00000061877	BC048679	protein_coding	0.682019	0.480182	0.340337	1.20083	0.427288	0.103306	0.199916	0.101742	0.327949	0.267848	0	0	466.633	246.48	377.266	518.958	1216.55	1053.21	980.157	805.419	5.72759	2.83695	2.97478	2.71352	0	0	0.098109	0	1.27001	0.321563	0.243529	0.924151	0.299233	0.193838	0	0.280892	0	0	0	0.112026	455.809	392.996	294.537	309.362	1107.92	734.148
Co	ENSMUSG00000004035	Gstm7	protein_coding	29.2025	31.9889	32.5062	32.4998	406.919	378.256	389.6	393.006	128.849	142.997	132.518	157.477	507.263	152.394	430.438	504.812	1148.08	1013.94	1154.65	709.055	556.757	443.161	379.912	485.516	17.1952	15.5954	24.5322	15.7723	28.9233	34.1506	29.9569	31.9801	379.726	349.826	400.995	399.034	188.07	163.989	154.011	159.951	512.824	516.238	428.307	413.098	1278.45	964.37
Co	ENSMUSG00000031818	Cox4i1	protein_coding	172.885	184.122	187.777	179.208	258.808	267.487	240.255	236.712	153.186	144.906	160.351	161.233	312.014	167.019	290.204	321.449	1210.57	950.096	1028.29	681.179	648.04	640.204	478.661	582.986	213.085	228.696	261.829	240.992	165.35	178.831	170.46	156.386	235.485	203.598	385.115	418.408	183.774	149.596	176.957	176.477	394.396	408.74	364.529	361.552	1127.65	717.151
Co	ENSMUSG00000067704	Wfdc13	protein_coding	0	0	0	0	0.0636555	0	0	0	0	0	0	0.117729	186.816	24.9295	47.2325	103.7	910.046	920.137	914.06	679.533	35.6172	19.414	33.1393	31.0359	0.24841	0	0.17539	0.115555	0	0.28743	0.14512	0.100128	0.118876	0.115509	0	0	0	0	0	0.0667569	189.584	208.643	83.9539	125.859	952.864	659.827
Co	ENSMUSG00000028843	Sh3bgrl3	protein_coding	19.7538	23.3003	17.0764	15.9133	70.3903	93.7008	49.9388	61.1712	172.976	192.879	157.378	198.425	184.395	92.7065	199.745	204.901	881.591	963.856	864.177	649.611	498.054	430.48	398.524	425.323	168.945	249.211	167.496	193.174	27.1436	27.2138	22.5852	22.2891	94.2509	92.75	120.332	115.169	229.028	227.755	316.437	250.698	199.117	237.134	166.061	171.464	1189.4	818.896
Co	ENSMUSG00000053790	Defb38	protein_coding	0	0	0	0	0	0	0	0	0.489248	0.998965	1.9205	0.22105	12.2458	0.266714	1.42058	2.46752	523.79	666.613	696.144	898.175	125.482	95.6357	109.468	126.341	0.699631	0.262541	1.31727	0.216968	0	0	0	0	0	0	0	0	0.218666	1.37601	0.500348	0	29.6253	67.7397	2.55071	6.7462	411.383	339.152
Co	ENSMUSG00000021242	Npc2	protein_coding	9.69174	9.73463	10.1843	9.85596	34.5042	35.2523	29.9602	29.8238	98.8678	106.02	111.273	114.195	391.254	149.439	286.914	333.321	774.328	669.05	651.524	519.259	80.8983	63.9663	115.773	68.6212	32.8739	28.5416	35.7249	35.3997	8.66945	11.0729	9.60633	8.736	40.1517	30.0269	35.1546	39.1256	85.0972	90.3506	95.0383	99.841	410.969	402.29	361.456	316.936	659.968	480.421
Co	ENSMUSG00000061232	H2-K1	protein_coding	18.9247	26.9216	19.8463	24.6061	379.406	385.933	359.363	351.495	100.725	124.893	113.982	113.014	276.849	110.675	215.47	237.554	685.374	485.216	539.689	362.536	195.574	178.395	257.934	165.971	119.053	114.073	136.435	128.013	23.0688	23.3914	22.622	19.9409	398.347	351.349	354.808	439.402	150.206	143.934	156.997	134.939	300.17	291.165	263.046	267.658	586.45	386.767
Co	ENSMUSG00000074596	Spint3	protein_coding	0.195912	0.183912	0.488814	0	0.368219	0	0.114853	0	4.52181	3.8983	4.7114	4.54007	17.5845	0.684741	2.50086	3.80096	471.409	454.396	457.642	338.722	221.952	183.594	107.194	194.213	2.15542	1.61767	1.80366	0.891245	0.456016	0.646589	0.746182	0	1.03147	0.445444	0	0	6.62438	7.06534	8.86344	6.69342	27.2145	47.3083	4.6276	7.8448	427.151	298.011
Co	ENSMUSG00000000805	Car4	protein_coding	1.21634	0.815595	1.04052	0.517752	1.14306	1.57919	1.06962	1.81451	0.557026	0.545931	0.34013	0.201339	18.763	2.30784	2.9575	7.35542	476.366	375.827	412.294	346.203	3.10681	1.30568	2.44214	2.23014	0.265518	0.358695	0.249959	0.148216	1.29427	1.39276	1.11682	1.28429	0.508251	0.642011	0.556664	0.357824	1.59334	0.751986	1.13933	1.08459	23.9269	40.5575	7.47314	12.4248	463.059	361.327
Co	ENSMUSG00000053695	Defb37	protein_coding	0.155004	0	0	0	0	0	0	0	15.503	10.2269	9.70917	6.10652	46.7131	30.5554	53.424	79.2832	277.083	431.808	396.687	415.172	40.8154	30.2829	33.8043	33.8991	0.189483	0	0.35676	0.52886	0	0	0	0	0.362706	0.528649	0	0	8.88332	8.72048	8.33393	8.14737	74.4684	87.9461	52.6402	46.591	266.475	168.587
Co	ENSMUSG00000078800	Bsph2	protein_coding	0	0	0	0	0	0	0	0	0	0.966668	0.114716	0.237671	8.03382	0.143384	0.436398	1.32652	305.757	335.243	429.609	364.813	21.0044	9.13768	13.0224	15.1636	0	0	0	0	0	0	0	0	0	0	0	0	0.352661	0.147947	0	0.134769	22.0232	37.4351	2.74249	4.26673	244.615	194.534
Co	ENSMUSG00000072791	Abcb5	protein_coding	0.056307	0.026429	0.0561959	0.0762614	0.335128	0.22175	0.429129	0.167995	2.34652	3.64133	2.01541	3.22953	22.4978	1.94833	6.10957	10.1464	311.648	348.648	366.538	341.003	300.468	296.05	175.697	273.457	23.7126	44.4399	32.9177	24.5426	0.0131064	0.106192	0.0134038	0.0416167	0.494089	1.28025	0.157836	0.0463805	4.13052	4.30497	4.09805	5.5123	34.7365	49.3192	7.81699	14.2308	312.848	226.748
Co	ENSMUSG00000025283	Sat1	protein_coding	2.09852	3.56111	2.61797	3.14829	49.6058	48.9998	54.9829	47.1987	82.537	90.3602	78.4531	73.2272	110.951	45.8132	104.534	113.411	342.249	318.564	359.103	291.595	261.595	240.688	260.279	252.924	59.3969	73.1985	67.9449	60.9055	2.44232	3.12049	2.7283	3.34066	34.4678	31.427	50.8088	49.663	78.6821	76.5539	73.2962	82.5681	144.139	137.333	119.389	112.991	309.154	252.778
Co	ENSMUSG00000039236	Isg20	protein_coding	30.0164	35.6227	41.7797	32.3054	5.72338	4.98756	4.64939	4.31304	3.47559	5.25674	3.59325	5.69973	133.084	95.2274	135.785	179.305	368.076	305.227	332.249	232.965	203.098	200.763	116.571	171.053	7.42454	8.91094	10.3976	7.02163	32.714	31.0025	33.9821	33.6859	5.52034	5.19279	5.8693	4.46533	7.01905	5.50304	6.45067	4.61709	128.856	113.98	111.808	120.647	290.434	222.866
Cd	ENSMUSG00000015090	Ptgds	protein_coding	102.257	111.857	88.9645	94.4014	77.2789	85.9951	76.604	69.433	20.1399	37.936	26.7203	79.4186	674.667	208.319	481.691	447.203	1250.45	1373.23	1128.4	832.914	2437.38	1987.69	956.673	1868.24	8.34355	8.09149	4.82634	5.98551	129.929	151.248	135.109	113.048	115.406	92.8786	89.3062	128.63	34.3562	36.1214	19.5185	28.7976	519.976	563.97	416.885	365.074	1050.31	1055.48
Cd	ENSMUSG00000022587	Ly6e	protein_coding	11.1706	11.6091	7.5438	8.86379	134.934	171.651	125.815	151.297	166.548	148.576	142.847	141.796	144.252	73.9058	121.222	136.693	523.424	513.923	500.384	392.039	1055.82	1058.07	543.781	885.9	421.447	555.464	429.096	409.751	16.436	20.9319	16.8545	12.9884	184.652	160.659	116.324	116.918	159.349	144.821	165.339	149.334	117.124	130.52	101.958	111.579	510.234	509.01
Cd	ENSMUSG00000044176	Spink10	protein_coding	0.294132	0.138058	0.0489253	0.106232	0.307125	0.178209	0.459826	0.409528	14.7719	32.4979	17.5465	45.4415	33.6539	12.6106	46.829	32.7407	193.458	255.512	286.582	284.838	686.055	698.042	474.207	645.677	14.1426	27.3227	17.9964	16.7259	0.0456426	0.184906	0.186713	0.0966195	0.975038	1.39326	0	0.161519	36.8601	32.9541	20.1857	26.991	91.7083	107.665	66.1992	63.5796	136.949	116.11
Cd	ENSMUSG00000006570	Defb2	protein_coding	0	0	0	0	0	0.433545	0.629245	0	0.688155	1.49878	0.800381	7.66936	52.5491	25.7602	41.6753	51.3245	194.778	217.234	173.905	116.075	578.635	619.105	344.186	509.149	18.1506	14.0326	24.0866	18.1072	0	0	0	0	0.418599	2.44045	0	0	2.46054	1.54835	1.40754	2.58579	62.2876	63.0756	49.5902	43.1653	144.254	109.59
Cd	ENSMUSG00000075602	Ly6a	protein_coding	2.1139	2.09168	1.99569	3.71421	98.7907	95.6772	105.305	111.139	33.5527	43.4988	37.5121	39.5872	28.9035	9.98431	28.2	29.357	58.0998	69.0516	71.3095	46.9606	615.317	598.939	247.092	412.738	82.6219	124.385	125.711	91.2276	1.43624	1.29298	1.52323	1.91428	83.9565	56.5073	97.0053	101.839	41.1249	39.8897	37.9102	42.5677	50.0441	37.8065	39.2123	34.8804	47.5901	50.9713
Cd	ENSMUSG00000070531	Wfdc6b	protein_coding	0.83173	1.3013	1.16212	1.74229	0.486344	0.134381	0.260054	0.0661737	2.844	5.80699	2.48086	17.6041	128.555	53.1015	127.938	152.565	134.598	97.9228	89.8015	89.7499	341.582	352.606	204.929	325.993	5.62596	3.81538	3.95627	3.90984	0.980898	1.09802	1.10875	1.25679	0.324372	1.38681	0	0.365388	5.46577	6.71897	6.32605	7.50485	170.06	147.94	191.173	161.65	77.0383	71.2064
Cd	ENSMUSG00000020733	Slc9a3r1	protein_coding	10.5722	10.6164	13.6913	12.1614	96.6003	101.354	89.6955	93.9684	24.3506	27.0417	28.8501	26.1092	29.7268	10.382	25.93	23.0627	163.69	147.505	147.519	101.711	330.815	312.501	188.655	278.01	53.6703	68.1047	64.1924	58.5715	12.5087	13.2033	11.821	11.48	101.641	109.234	92.799	114.306	32.2277	24.9412	27.0217	23.4644	26.5808	30.2629	26.3252	25.0278	140.814	131.883
Cd	ENSMUSG00000074594	Wfdc9	protein_coding	0.698228	0.374547	0.1991	0.324229	0.374951	0	0	0	2.30224	2.29817	2.00827	11.2109	115.466	49.087	99.9534	121.391	81.219	72.0369	73.8892	55.2307	241.574	247.447	160.879	209.542	5.97479	8.51075	9.64231	5.44523	0.557224	0.188117	0.379912	0.688083	0.350108	0.793778	0	0.492973	2.62959	3.16558	2.22367	2.35931	151.387	142.29	147.59	123.765	63.8804	47.9261
Cd	ENSMUSG00000026644	Acbd7	protein_coding	0.817401	0.383666	0.509868	1.10708	0.768158	1.23812	0.479201	0.365814	0.786094	1.07005	0.68572	1.06551	8.00373	2.57124	9.13003	6.3675	104.748	152.844	144.118	133.526	213.022	188.65	140.631	198.592	30.7261	20.3887	38.9203	33.6992	0.285394	0.289045	0.486451	0.402762	0.836806	0.813103	0.163663	0.168325	0.585567	0.147393	0.401965	0.402791	13.7595	15.603	8.7431	7.22627	82.2835	67.8374
Cd	ENSMUSG00000020600	Slc7a15	protein_coding	0.400556	0.268586	0.513985	0.620009	25.5252	18.4791	19.4235	22.7748	1.17399	1.07869	1.66414	0.895098	0.249024	0.0400001	0.0304357	0	2.19144	15.8165	6.53247	2.89621	189.09	186.089	130.368	201.23	7.69459	15.1985	11.985	11.8769	0.506137	0.59355	0.490379	0.6203	11.8835	17.109	10.5407	11.4065	2.75472	0.78419	0.600313	0.413563	0.173556	0	0.0255026	0.208302	4.56561	3.74919
Cd	ENSMUSG00000024039	Cbs	protein_coding	0.0874033	0.123074	0.130846	0.0947022	26.8317	25.6572	28.7969	21.3312	2.46564	2.33415	2.32189	1.72166	2.68634	0.610974	1.6271	1.31035	84.3514	69.3747	97.7392	54.4787	174.221	164.378	111.319	165.483	2.8314	4.02949	3.19355	4.00101	0.142411	0.0824189	0.124837	0.1938	30.7805	31.2252	37.1005	31.1017	4.63342	1.70213	0.888283	1.57923	2.43887	4.34055	0.837501	1.84083	76.4546	76.7607
Cd	ENSMUSG00000026249	Serpine2	protein_coding	0.53066	0.603824	0.43332	0.574974	7.55593	7.34617	8.8239	7.13903	3.58782	3.31764	3.32755	2.75763	1.8195	0.517077	1.65929	1.8341	4.01716	7.47232	4.27527	3.0114	183.086	180.817	90.542	159.577	15.6081	22.1299	21.8367	18.0873	0.329385	0.667198	0.612472	0.491256	7.03648	4.84452	5.76975	5.03337	3.40986	3.20121	3.39508	4.20503	2.26305	2.33585	2.88103	2.52545	2.6687	3.49443
Cd	ENSMUSG00000051050	Spink14	protein_coding	0	0	0	0	0.241576	0	0	0.115044	0.247217	0.100955	0.107825	0.223394	0.209756	0.269541	0.615274	0.113349	0.113593	1.87562	0.0978204	0.195162	146.451	191.23	38.4958	158.661	0.235682	0.265324	0	0	0	0	0	0	0	0.10959	0	0	0	0	0	0.126673	0.233901	0.119681	0.257775	0.100261	0.102551	0.421066
Cd	ENSMUSG00000053729	Spinkl	protein_coding	0	0	0.0918277	0.199386	0	0	0	0.109806	2.35961	3.17984	5.35162	3.09172	2.20226	1.41498	4.89384	3.24564	29.7073	43.3866	40.8945	49.363	121.437	126.126	109.159	133.487	8.88559	6.9642	10.2708	6.80175	0.0856665	0.0867623	0.175221	0	0.322949	0.523003	0	0	2.95292	3.45094	2.05117	5.92436	3.4604	3.99813	2.70642	3.34934	29.3647	27.2283
Cd	ENSMUSG00000028262	Clca3a2	protein_coding	0.104524	0.112139	0.11922	0.0485368	0.224519	0.18094	0.262616	0.160382	10.3201	9.94569	8.73514	8.89308	5.84838	2.5886	5.63889	6.0925	18.6159	14.612	25.1073	17.7149	153.164	171.043	33.1725	102.813	15.4242	36.331	17.854	17.6615	0.0973184	0.0422414	0.127963	0.0735752	0.786162	1.57871	0.047836	0	8.54044	10.1454	9.98642	10.3405	5.18104	5.22786	4.71162	4.27081	14.9479	15.3762
Cd	ENSMUSG00000031099	Smarca1	protein_coding	3.18408	2.72216	3.14375	3.52391	5.11534	3.91347	5.25333	5.40136	0.947802	2.4295	1.43733	3.25457	3.01878	2.16217	4.47585	3.94454	24.6159	41.5447	34.0991	37.6186	111.556	111.242	83.9899	126.882	3.92015	4.78878	2.63042	3.89286	3.07046	3.45288	2.80446	3.2835	2.16868	2.2236	2.84156	3.33464	2.22887	2.34582	1.23773	1.70351	3.53182	4.99788	2.34146	2.36546	20.4449	19.0987
Cd	ENSMUSG00000047390	Defb9	protein_coding	0	0	0	0	0	0	0	0	0	0	0	0	1.14892	0	0.561686	0.827814	17.8363	20.95	28.3976	23.8739	88.3038	99.5677	69.2623	97.2238	1.9364	1.69551	2.02548	1.4012	0	0	0	0	0.205924	0.600272	0	0	0	0	0	0	0.640588	0.655545	0.470647	0.183056	11.9833	16.3367
Cd	ENSMUSG00000015702	Anxa9	protein_coding	3.26436	3.44746	3.51972	3.7896	5.55109	5.15645	4.75015	4.661	19.733	16.7576	14.4748	15.67	14.3329	6.72341	13.6421	10.864	2.78193	5.10386	4.90962	3.21589	94.3386	88.5421	56.8401	97.7976	5.13063	6.05668	7.64747	4.74015	3.12074	3.46298	3.49683	3.6765	7.05882	5.40095	3.54814	3.74522	18.4075	18.2895	18.155	19.5328	13.3308	14.4743	14.1848	12.1862	4.24789	3.3737
Cd	ENSMUSG00000009394	Syn2	protein_coding	2.76064	1.91375	2.0346	2.74574	1.47234	1.21801	1.52713	0.979934	1.23442	2.04604	1.58353	2.77225	8.07088	2.19696	4.96977	5.32688	35.6667	41.4316	43.1122	29.1917	98.3499	90.7109	50.072	93.698	2.33634	3.95501	2.49269	3.25238	2.53078	2.24276	2.65561	2.69262	1.73918	2.10838	1.31525	1.04952	1.97969	1.3683	1.33669	0.781336	6.93888	9.21006	4.87092	6.34617	45.7395	42.0343
Cd	ENSMUSG00000004317	Clcn5	protein_coding	2.04849	1.91081	2.07041	1.9659	5.78544	5.20887	5.91696	6.10792	11.8244	20.459	16.1047	27.9104	38.1212	14.4832	38.0137	35.6794	55.3123	57.1552	62.4141	49.26	82.1739	75.9306	72.356	80.2992	4.11795	7.19544	6.94504	5.38433	1.79829	1.64346	1.95056	1.82647	3.56083	3.12728	2.22918	2.41051	24.2253	16.7266	11.9392	12.5106	47.8428	52.5447	44.5469	47.5015	37.2271	41.5006
Dd	ENSMUSG00000052131	Akr1b7	protein_coding	0.127779	0.0399839	0.127527	0	22.255	35.7674	47.6429	18.4009	0.0546155	0	0	2.0728	44.0226	0.178642	0.634327	4.60758	59.3749	53.5262	64.097	48.246	18.277	20.4375	18.5779	15.7874	19799	21162.9	19765.2	20267.1	0.0793134	0.0803279	0.12167	0.0839481	62.3912	105.027	4.02528	7.36765	0	0.0614425	0	0	8.11278	5.39379	4.63176	7.75239	45.9913	66.9761
Dd	ENSMUSG00000035783	Acta2	protein_coding	28.1845	32.1811	33.2043	32.0318	185.368	166.198	157.473	171.946	159.173	172.802	233.528	255.367	243.077	118.425	340.424	264.835	197.285	190.322	153.664	103.019	1082.88	1207.3	895.719	988.752	1785.94	2041.51	1880.94	1826.05	24.5301	30.0438	24.1533	24.756	187.172	130.952	201.782	208.841	157.453	145.13	134.382	153.538	185.648	185.343	188.363	189.296	156.631	87.3808
Dd	ENSMUSG00000026421	Csrp1	protein_coding	8.92445	9.33044	10.9027	10.8663	88.2999	78.0873	71.7775	82.2129	67.7043	69.1754	80.493	83.6945	74.6234	32.7571	86.1723	75.6671	65.3838	55.205	48.6424	30.0929	371.042	431.579	310.425	328.435	1087.27	1162.12	1189.16	1215.94	8.17028	8.41551	7.38937	7.26526	97.4307	75.3295	70.9975	90.1312	58.4332	57.567	59.4161	59.5382	68.0047	59.4019	62.9202	64.6946	49.7884	35.4617
Dd	ENSMUSG00000032487	Ptgs2	protein_coding	0	0.0115022	0	0	1.81163	2.46467	3.90764	1.65237	1.28833	1.84781	2.08318	1.5333	3.66591	0.633812	1.13397	1.1814	1.01068	0.995678	0.808177	1.19069	10.3961	16.2305	4.21607	5.40963	1131.19	1011.17	1227.92	1139.18	0.0228162	0	0	0.0362242	4.50137	9.49993	0.529912	0.847785	1.4325	1.20192	1.36576	1.28806	0.921634	1.004	1.19044	1.21065	1.06886	1.00349
Dd	ENSMUSG00000018830	Myh11	protein_coding	4.57421	6.00082	6.30587	5.10774	36.6983	39.2387	40.5524	37.663	33.3461	35.1702	46.4344	48.6641	53.2477	43.4884	66.2937	50.6512	35.7434	39.7357	35.2468	21.944	297.454	334.892	215.982	290.09	974.585	915.307	959.021	955.271	3.24778	3.63843	3.62699	4.20778	34.8924	29.845	26.1978	26.0088	31.4579	27.9252	26.842	29.589	33.0871	36.1476	37.6191	36.1346	26.1601	16.8806
Dd	ENSMUSG00000031328	Flna	protein_coding	10.7562	11.2905	11.8812	14.2551	132.746	127.657	125.775	126.572	62.3837	61.4994	82.3849	72.2445	131.765	39.0151	104.043	88.2898	133.377	129.421	134.559	75.6483	363.089	384.897	307.185	333.775	879.57	819.987	975.833	1018.08	11.1561	11.6091	11.1573	11.9288	120.289	97.4067	65.2682	75.0781	56.6738	54.7958	50.7939	56.3248	95.3224	93.3824	89.4969	100.006	127.62	89.6179
Dd	ENSMUSG00000032085	Tagln	protein_coding	4.8233	5.26644	5.90628	5.70793	45.7345	45.3068	44.9217	44.2128	45.8813	43.7423	61.0291	67.4219	54.7461	21.9036	65.6099	57.3579	51.5154	44.868	37.8018	26.9055	389.918	449.9	333.59	363.804	614.417	699.79	647.227	616.717	4.39525	4.74179	3.25724	4.11272	45.786	33.8335	46.5748	51.6207	45.9139	38.293	40.0141	41.9393	38.7205	41.4507	43.206	38.2111	39.1207	20.3957
Dd	ENSMUSG00000001349	Cnn1	protein_coding	1.32909	1.54884	2.05831	1.46491	13.1506	12.9676	13.864	12.8534	11.489	12.5753	16.7631	23.3127	23.7344	10.6363	25.9855	21.2864	16.9037	13.4546	11.0454	7.56204	155.395	175.658	131.113	153.57	575.828	643.267	599.259	649.64	1.13079	1.21008	1.46193	1.08396	14.5046	12.713	12.9938	13.7037	13.1066	9.78477	10.4876	11.6233	14.5677	13.5707	17.035	15.4917	10.1656	4.52924
Dd	ENSMUSG00000022836	Mylk	protein_coding	9.42134	8.73295	8.57453	11.1375	94.5975	89.8019	87.5626	95.2339	84.5379	75.9613	90.7168	61.2004	45.5526	20.084	46.2903	39.4084	35.557	29.8109	36.6844	21.4951	91.0353	106.321	76.3872	90.4615	611.152	550.166	592.145	633.227	9.49258	10.3176	9.84742	9.79988	90.6714	73.0955	42.1566	41.1285	68.5175	73.2354	80.2558	84.801	35.9228	31.8006	35.3252	40.508	46.8196	38.5174
Dd	ENSMUSG00000067818	Myl9	protein_coding	22.9758	23.4301	28.2407	26.3619	72.9723	64.6502	68.9074	60.3814	56.4413	57.698	84.4019	74.71	82.2529	52.8822	107.129	82.8107	95.4143	79.886	68.668	43.2347	380.896	434.284	324.671	341.838	551.146	592.506	607.692	630.046	21.3469	28.0056	23.996	20.64	60.1578	52.9549	97.0812	107.655	55.6638	47.7969	43.7037	49.5776	64.4336	66.0582	65.1033	62.1807	67.2036	39.2452
Dd	ENSMUSG00000031613	Hpgd	protein_coding	4.8953	5.02151	6.53576	4.70695	36.9656	39.5593	45.4237	41.6302	6.48493	7.97866	9.97207	8.11385	10.1933	6.75326	17.4157	17.1539	43.741	50.6108	54.511	53.8524	101.56	113.276	89.0215	105.452	574.325	639.643	567.72	589.153	4.92004	6.26694	4.63039	5.11171	22.227	22.1871	25.6529	24.4074	10.1072	8.46472	6.33447	7.11431	13.0972	14.852	10.6341	9.57592	36.9027	39.9684
Dd	ENSMUSG00000029802	Abcg2	protein_coding	8.67525	8.14385	8.63908	8.28291	4.34089	4.27895	6.06498	5.21648	5.32336	6.72656	6.70391	6.07102	3.02153	1.06741	2.86296	2.01994	1.72064	1.57292	1.71416	1.31387	2.09936	2.11042	4.31998	1.95981	492.145	552.939	522.692	515.451	6.75322	7.58656	7.26087	8.22943	3.56197	3.60212	3.04213	2.42126	6.03836	5.61708	5.61936	6.32066	3.51986	2.92666	3.50481	3.50391	1.01529	0.990061
Dd	ENSMUSG00000032548	Slco2a1	protein_coding	0.436676	0.654446	0.581086	0.738765	19.8033	17.0998	16.3302	14.7839	7.49527	6.6913	7.50653	7.30559	9.3184	2.62407	6.08769	5.63906	5.17273	6.48848	7.02768	3.6836	36.9916	40.8554	21.5045	34.8146	462.223	388.117	526.651	506.06	0.54923	0.585152	0.700292	0.807815	21.9958	26.3197	10.2465	11.3209	7.34095	6.82975	6.86163	7.0972	6.40378	5.89702	5.52436	6.4062	5.36268	5.92295
Dd	ENSMUSG00000032366	Tpm1	protein_coding	6.24909	6.9474	7.27308	7.03686	76.3854	79.6132	71.6545	78.0703	38.9514	39.2077	50.935	48.4544	165.882	100.141	158.237	194.442	38.8431	39.7804	36.2084	29.2207	167.919	188.982	144.876	170.99	446.277	411.288	443.222	461.339	5.71283	6.72945	5.35709	5.11641	66.8183	57.0058	62.8407	67.5229	38.3887	35.0237	34.7351	37.8579	128.059	112.509	138.664	134.603	30.4079	25.461
Dd	ENSMUSG00000026208	Des	protein_coding	1.87397	1.97908	1.70843	2.10856	21.6974	20.1971	19.8807	18.3001	18.461	18.8519	25.496	27.4136	20.4078	11.6133	27.5253	22.4587	16.4768	18.0041	13.7136	7.82496	171.337	213.658	136.23	150.58	346.002	353.141	414.935	375.617	2.46619	2.19189	2.19616	1.7402	23.9281	21.9188	24.5333	27.963	19.7653	17.8055	17.9111	17.4743	17.0295	16.9797	18.2616	18.6285	15.7379	8.73642
Dd	ENSMUSG00000029322	Plac8	protein_coding	5.21544	4.81228	5.82799	5.55437	6.75841	5.4016	6.11509	7.39458	14.747	15.8258	20.2433	13.894	81.2819	27.047	56.239	67.1956	4.9901	4.33661	6.01611	3.29399	9.99882	10.7185	16.8074	7.00264	334.853	299.55	395.206	376.171	3.98433	4.70785	5.94233	4.96395	5.47615	5.32104	7.35443	6.53578	11.9559	12.9894	14.8478	15.9912	116.867	105.65	109.028	95.97	5.64318	3.11534
Dd	ENSMUSG00000028464	Tpm2	protein_coding	1.53023	2.40201	2.32837	2.25599	13.9875	16.5669	13.8535	13.2026	14.7323	14.9748	18.3789	20.3177	18.2859	23.2172	29.6476	22.2111	14.9279	16.6526	11.7351	7.87196	112.185	140.485	97.5029	113.304	334.687	308.84	355.087	348.894	1.91523	2.12897	1.71982	1.73049	12.5618	13.0045	11.3716	15.7454	15.4981	13.0999	12.6651	12.9878	9.83021	12.2087	10.2633	11.5321	10.995	7.04013
Dd	ENSMUSG00000055322	Tns1	protein_coding	45.019	41.7783	43.7172	40.5923	93.4322	95.843	86.7035	98.0382	23.5595	22.424	29.3449	29.1996	39.4549	14.6575	31.449	24.3207	17.4507	21.906	22.4999	10.0475	68.7757	76.8758	57.9634	61.2432	348.843	263.195	343.372	359.802	48.7766	45.5079	47.1309	48.3088	106.887	92.9488	33.2976	32.9381	24.8749	23.0295	21.4951	23.3306	24.1038	23.4363	22.5404	27.0299	21.3982	14.8265
Dd	ENSMUSG00000033684	Qsox1	protein_coding	30.278	33.6584	33.362	35.3314	19.8151	18.7344	19.9551	15.8232	27.8407	26.5255	29.3371	27.709	75.3422	21.5247	52.3308	62.4548	124.023	92.5028	105.579	64.1132	194.977	196.047	90.9871	154.599	300.466	251.624	347.776	350.823	29.3878	31.9005	31.4625	31.121	17.1672	15.2375	10.2713	12.9731	27.668	25.6641	32.7085	31.8887	62.4506	54.6307	53.6616	59.0709	90.8532	78.4817
Dd	ENSMUSG00000030409	Dmpk	protein_coding	7.71519	7.38637	6.6491	7.28083	16.7437	19.0691	17.8901	15.1935	7.21717	6.87695	9.85031	9.89344	15.2881	6.10241	13.2374	11.6606	8.09873	9.53142	9.61626	4.51535	53.3978	57.8088	42.4936	52.2078	268.056	228.764	277.377	306.694	9.55401	7.63627	8.22132	8.30114	24.885	19.0872	9.90491	10.0609	7.2852	6.37948	6.02525	6.91812	7.71103	8.05746	7.96906	8.76101	9.59256	6.7734
[truncated: 10 more columns]
