# Supplementary material for: Anatomical Transcriptome Atlas of the Male Mouse Reproductive System During Aging
Source: Front Cell Dev Biol. 2022 Feb 8;9:782824. doi: 10.3389/fcell.2021.782824 (PMC8861499; doi:10.3389/fcell.2021.782824)
Supplement: Supplementary file 6 [file Table11.XLSX]

## Sheet: Sheet 1
Groups	Intersection number of genes	Intersection genes
Ca	14	Lat,Slfn1,Cd48,Fancd2,H2-M3,Sash3,Cd40lg,Hfe,Cd209a,Nlrc3,Btla,Cd3d,Nckap1l,Slc46a2
Ca,Cd	0
Ca,Co	4	Itgal,5830411N06Rik,Cxcr4,Cd3e
Ca,Co,Cd	1	Slamf6
Cd	9	Il7,Ctla2a,Cdkn2a,Fas,Jaml,Foxn1,Sftpd,Ido1,Slc4a1
Co	13	Stx11,Foxj1,Il12rb1,Bcl11a,Cd5,Blk,Zap70,Ihh,Carmil2,Ripk3,Lax1,Ccr7,Crip3
Co,Cd	1	Vsig4
Is	16	Foxp3,Havcr2,Cd27,Lag3,Tespa1,Itgb2,Tnfsf13b,Sla2,Tigit,Apbb1ip,Ripor2,Tnfsf8,Cd244,Rac2,Ccdc88b,Tnfaip8l2
Is,Ca	6	Coro1a,Cd6,Ptprc,Zfp683,Ly9,Vcam1
Is,Ca,Cd	1	Themis
Is,Ca,Co	5	Itk,Lck,Rasal3,Spn,Il7r
Is,Ca,Co,Cd	2	Ccl5,Cd8a
Is,Cd	2	B2m,Rasgrp1
Is,Co	1	Il2ra
Is,Co,Cd	0
Te	3	Batf,Fcer1g,Eomes
Te,Ca	2	Gpnmb,Cd83
Te,Ca,Cd	0
Te,Ca,Co	0
Te,Ca,Co,Cd	1
Te,Cd	0
Te,Co	0
Te,Co,Cd	1	Egr1
Te,Is	4	Cd86,Card11,Cd2,Cd4
Te,Is,Ca	0
Te,Is,Ca,Cd	0
Te,Is,Ca,Co	0
Te,Is,Ca,Co,Cd	1	Pla2g2d
Te,Is,Cd	0
Te,Is,Co	0
Te,Is,Co,Cd	0
