# Supplementary material for: Anatomical Transcriptome Atlas of the Male Mouse Reproductive System During Aging
Source: Front Cell Dev Biol. 2022 Feb 8;9:782824. doi: 10.3389/fcell.2021.782824 (PMC8861499; doi:10.3389/fcell.2021.782824)
Supplement: Supplementary file 7 [file Table4.XLSX]

## Sheet: Sheet1
Table S4a. Genes previously reported with transcriptionally region-enriched expression pattern in murine male reproductive tract
Region of male reproductive tract	Genes enriched	References (PMID)
Testis	Ldhc; Prm1; Prm2; Tnp1; Akap4; Gsg1; Gapdhs; Crisp2; Sun5; Fhl4; Oaz3(more than 1000)	19875487; 30012089; 12029067; 19893612; 24012201
Efferent ductules	Aqp1; Aqp9; Lrp2; Cyp2e1	29052330; 10369389; 12724279
Initial segment	Cst11; Adam28; Ovch2; Teddm1; Cystatin E1; Cystatin E2; GPX5*	12072414; 32499443; 16707773; 12700194;10645275; 32814578
Caput epididymis	Lcn5; Glul; Rnase9; Defb12; Defb15; Defb30; Spint4; Lcn8; GPX5*; Cst12; Rnase10; Agr2; Bmyc; Spink11; Mettl7a1; Etv5; Ido1; Ifngr2; Exosc6; Clu; 9230105E05Rik; Arpc2; Bpi; Ctnnbip1; Cxxc5; Cystm1; Elovl4; Fkbp11; Gja1; Gm11728; Gm16136; Gm3428; Gopc; Ifitm2; Ifitm3; Itm2c; Klrb1a; Klrb1c; Krt23; Lamtor4; Lcp1; Letm1; Lingo1; Lrcol1; Mal; Mup6; Obp2a; Pabpc1l; Pemt; Phf6; Plekha3; Slc50a1; Syne1; …	17589789; 7915421; 24719258; 25099571; 14718547; 32814578; 32729827; 15878890; 34001862
Corpus epididymis	Defb38; Defb37; Cuzd1; Spint4; Cyp17a1; Car4; Gdf11; Npy; Aqp6; Hexb; Aspg; Rnase11; Agt	14718547; 16707773; 32729827;34001862
Cauda epididymis	Ptgds; Clcn5; Spink14; Defb2; S100a8; Smarca1; Mettl20; Atf3; Zfp36; Col3a1; Defb40; Gpx3; Ly6c1; Defb11; Id1; Ly6f; Aebp1; Nr4a1; Egr1; Junb; Klf2; Acot9; Car2; ccdc198; Comt; Gm13782; Gm34646; Gm42794; Gpr82; Gstm6; Odam; Pwwp3b; Ramp3; Scp2; Srgn; Aldh3a1; Gstm7; Spint3	11804971; 12475763; 32729827; 34001862
Vas deferens	Akr1b7; Ptgs2; Tpm1; Tpm2; Crygc; Myl1; Idh1; Prdm10; Nnmt; Pdlim3; Prrx2; Fxyd1; Plin2	17641092; 32729827; 17382448;
* The data are based on the existing literature. In some studies, the caput epididymis did not remove the initial segment which may cause overlap of genes. Comparitive analysis with the RNA-seq data of the present study is showed in sheet 2.

## Sheet: Sheet2
Table S4b. Comparitive analysis on region-specific genes between our RNA-seq and previously published data in post-testis regions (0 - low or no expression; 1 - Moderate expression；2 - high expression)
Reported region-specific genes	IS	caput	corpus	cauda	VD	PMID	Method	Reference	Top 20 region-specific genes in our data	Regions with enriched expression	Reported Previous	Reported region with enriched expression
Lcp1	1	1	1	1		16707773	In situ hybridization	Identification and characterization of novel and unknown mouse epididymis-specific genes by complementary DNA microarray technology，Biol Reprod.2006	Lcn8	IS	no
Cuzd1	1	1	2	1	0				Defb25	IS	no
Teddm1	2	0	0	0	0				9230104L09Rik	IS	yes	no imformation
Wfdc16	1	1	1	1					Lcn9	IS	no
Serpina1f	0	2	1	2					Defb20	IS	no
Cystatin E1	2	1	0	0	0	12700194	Northern blot	Cystatin E1 and E2, new members of male reproductive tract subgroup within cystatin type 2 family,Biol Reprod.2003	Cst11	IS	yes	IS or caput
Cystatin E2	2	1	0	0	0				Defb48	IS	no
GPx3	1	1	1	1	1	9820194	Northern blot	GPx3: The plasma‐type glutathione peroxidase is expressed under androgenic control in the mouse epididymis and vas deferens	Lcn2	IS	no
GPX5	2	0	0	0	0	10645275	In situ hybridization	Characterization, regulation of the expression and putative roles of two glutathione peroxidase proteins found in the mouse epididymis	Mfge8	IS	no
9230104L09Rik						9826679	RT-PCR	Testatin: a cystatin-related gene expressed during early testis development	Ly6g5c	IS	no
Crisp1						8319566	RT-PCR	Transcripts for cysteine-rich secretory protein-1 (CRISP-1; DE/AEG) and the novel related CRISP-3 are expressed under androgen control in the mouse salivary gland	Gm4846	IS	no
Lnc8		2				32729827	RNA-seq	An atlas of cell types in the mouse epididymis and vas deferens	Rnase10	IS	yes	Caput
Defb12		2				32729827	RNA-seq	An atlas of cell types in the mouse epididymis and vas deferens	Ly6g5b	IS	no
Gpx5		2				32729827	RNA-seq	An atlas of cell types in the mouse epididymis and vas deferens	Cst8	IS	yes	IS or caput
Cst12		2				32729827	RNA-seq	An atlas of cell types in the mouse epididymis and vas deferens	Teddm1a	IS	no
Rnase10		2				32729827	RNA-seq	An atlas of cell types in the mouse epididymis and vas deferens	Actg2	IS	no
Agr2		2				32729827	RNA-seq	An atlas of cell types in the mouse epididymis and vas deferens	Adam28	IS	yes	IS or caput
Bmyc		2				32729827	RNA-seq	An atlas of cell types in the mouse epididymis and vas deferens	Defb47	IS	no
Pemt		2				32729827	RNA-seq	An atlas of cell types in the mouse epididymis and vas deferens	Ovch2	IS	no	Cauda
Spink11		2				32729827	RNA-seq	An atlas of cell types in the mouse epididymis and vas deferens	Lcn10	IS	no
Mettl7a1		2				32729827	RNA-seq	An atlas of cell types in the mouse epididymis and vas deferens	Clu	Caput	yes	Caput or corpus
Etv5		2				32729827	RNA-seq	An atlas of cell types in the mouse epididymis and vas deferens	Lcn5	Caput	no
Ido1		2				32729827	RNA-seq	An atlas of cell types in the mouse epididymis and vas deferens	Slc38a5	Caput	no
Ifngr2		2				32729827	RNA-seq	An atlas of cell types in the mouse epididymis and vas deferens	Glul	Caput	no
Exosc6		2				32729827	RNA-seq	An atlas of cell types in the mouse epididymis and vas deferens	Rnase9	Caput	no
Spint4			2			32729827	RNA-seq	An atlas of cell types in the mouse epididymis and vas deferens	Epp13	Caput	no
Cyp17a1			2			32729827	RNA-seq	An atlas of cell types in the mouse epididymis and vas deferens	Lypd8	Caput	no
Car4			2			32729827	RNA-seq	An atlas of cell types in the mouse epididymis and vas deferens	Ap1s2	Caput	no
Gdf11			2			32729827	RNA-seq	An atlas of cell types in the mouse epididymis and vas deferens	9230113P08Rik	Caput	no
Npy			2			32729827	RNA-seq	An atlas of cell types in the mouse epididymis and vas deferens	Rnase13	Caput	no
Aqp6			2			32729827	RNA-seq	An atlas of cell types in the mouse epididymis and vas deferens	Defb30	Caput	no
Hexb			2			32729827	RNA-seq	An atlas of cell types in the mouse epididymis and vas deferens	Defb15	Caput	no
Aspg			2			32729827	RNA-seq	An atlas of cell types in the mouse epididymis and vas deferens	Defb12	Caput	yes	Caput
Rnase11			2			32729827	RNA-seq	An atlas of cell types in the mouse epididymis and vas deferens	Ace	Caput	no
Agt			2			32729827	RNA-seq	An atlas of cell types in the mouse epididymis and vas deferens	Spint4	Caput	yes	Corpus
Spink14				2		32729827	RNA-seq	An atlas of cell types in the mouse epididymis and vas deferens	Man1a	Caput	no
S100a8				2		32729827	RNA-seq	An atlas of cell types in the mouse epididymis and vas deferens	St6gal1	Caput	no
Defb2				2		32729827	RNA-seq	An atlas of cell types in the mouse epididymis and vas deferens	Ido1	Caput	yes	Caput
Smarca1				2		32729827	RNA-seq	An atlas of cell types in the mouse epididymis and vas deferens	Defb21	Caput	no
Mettl20				2		32729827	RNA-seq	An atlas of cell types in the mouse epididymis and vas deferens	Teddm1b	Caput	yes	Caput
Akr1b7					2	32729827	RNA-seq	An atlas of cell types in the mouse epididymis and vas deferens	Gpx3	Corpus	yes	Cauda or multiple regions
Crygc					2	32729827	RNA-seq	An atlas of cell types in the mouse epididymis and vas deferens	Cuzd1	Corpus	yes	Corpus
Ptgs2					2	32729827	RNA-seq	An atlas of cell types in the mouse epididymis and vas deferens	Defb22	Corpus	no
Myl1					2	32729827	RNA-seq	An atlas of cell types in the mouse epididymis and vas deferens	Npy	Corpus	yes	Corpus
Tpm2					2	32729827	RNA-seq	An atlas of cell types in the mouse epididymis and vas deferens	Wfdc16	Corpus	no
Idh1					2	32729827	RNA-seq	An atlas of cell types in the mouse epididymis and vas deferens	BC048679	Corpus	no
Prdm10					2	32729827	RNA-seq	An atlas of cell types in the mouse epididymis and vas deferens	Gstm7	Corpus	yes	Corpus
Nnmt					2	32729827	RNA-seq	An atlas of cell types in the mouse epididymis and vas deferens	Cox4i1	Corpus	no
Pdlim3					2	32729827	RNA-seq	An atlas of cell types in the mouse epididymis and vas deferens	Wfdc13	Corpus	no
Prrx2					2	32729827	RNA-seq	An atlas of cell types in the mouse epididymis and vas deferens	Sh3bgrl3	Corpus	no
Hpgd					2	32729827	RNA-seq	An atlas of cell types in the mouse epididymis and vas deferens	Defb38	Corpus	no
Fxyd1					2	32729827	RNA-seq	An atlas of cell types in the mouse epididymis and vas deferens	Npc2	Corpus	no
Plin2					2	32729827	RNA-seq	An atlas of cell types in the mouse epididymis and vas deferens	H2-K1	Corpus	no
Adam28	2	2	0	0		15878890	Microarray and RT-PCR	The Mouse Epididymal Transcriptome: Transcriptional Profiling of Segmental Gene Expression in the Epididymis	Spint3	Corpus	yes	Corpus
Myom2	0	2	0	0		15878890	Microarray and RT-PCR	The Mouse Epididymal Transcriptome: Transcriptional Profiling of Segmental Gene Expression in the Epididymis	Car4	Corpus	yes	Corpus
Smpx	0	0	0	2		15878890	Microarray and RT-PCR	The Mouse Epididymal Transcriptome: Transcriptional Profiling of Segmental Gene Expression in the Epididymis	Defb37	Corpus	no
Emb	1	0	0	2		15878890	Microarray and RT-PCR	The Mouse Epididymal Transcriptome: Transcriptional Profiling of Segmental Gene Expression in the Epididymis	Bsph2	Corpus	no
Clu	0	2	2	1		15878890	Microarray and RT-PCR	The Mouse Epididymal Transcriptome: Transcriptional Profiling of Segmental Gene Expression in the Epididymis	Abcb5	Corpus	no
Crisp1	1	1	2	2		15878890	Microarray and RT-PCR	The Mouse Epididymal Transcriptome: Transcriptional Profiling of Segmental Gene Expression in the Epididymis	Sat1	Corpus	no
Gpx5	2	2	1	0		15878890	Microarray and RT-PCR	The Mouse Epididymal Transcriptome: Transcriptional Profiling of Segmental Gene Expression in the Epididymis	Isg20	Corpus	no
Cst8	2	2	0	0		15878890	Microarray and RT-PCR	The Mouse Epididymal Transcriptome: Transcriptional Profiling of Segmental Gene Expression in the Epididymis	Ptgds	Cauda	no
Ros1	2	2	1	0		15878890	Microarray and RT-PCR	The Mouse Epididymal Transcriptome: Transcriptional Profiling of Segmental Gene Expression in the Epididymis	Ly6e	Cauda	no
Srd5a2	2	2	1	1		15878890	Microarray and RT-PCR	The Mouse Epididymal Transcriptome: Transcriptional Profiling of Segmental Gene Expression in the Epididymis	Spink10	Cauda	no
9230105E05Rik		2				34001862	Single-cell sequencing	Spatio-temporal landscape of mouse epididymal cells and specific mitochondria-rich segments defined by large-scale single-cell RNA-seq	Defb2	Cauda	yes	Cauda
Arpc2		2				34001862	Single-cell sequencing	Spatio-temporal landscape of mouse epididymal cells and specific mitochondria-rich segments defined by large-scale single-cell RNA-seq	Ly6a	Cauda	no
Bpi		2				34001862	Single-cell sequencing	Spatio-temporal landscape of mouse epididymal cells and specific mitochondria-rich segments defined by large-scale single-cell RNA-seq	Wfdc6b	Cauda	no
Ctnnbip1		2				34001862	Single-cell sequencing	Spatio-temporal landscape of mouse epididymal cells and specific mitochondria-rich segments defined by large-scale single-cell RNA-seq	Slc9a3r1	Cauda	no
Cxxc5		2				34001862	Single-cell sequencing	Spatio-temporal landscape of mouse epididymal cells and specific mitochondria-rich segments defined by large-scale single-cell RNA-seq	Wfdc9	Cauda	no
Cystm1		2				34001862	Single-cell sequencing	Spatio-temporal landscape of mouse epididymal cells and specific mitochondria-rich segments defined by large-scale single-cell RNA-seq	Acbd7	Cauda	no
Elovl4		2				34001862	Single-cell sequencing	Spatio-temporal landscape of mouse epididymal cells and specific mitochondria-rich segments defined by large-scale single-cell RNA-seq	Slc7a15	Cauda	no
Fkbp11		2				34001862	Single-cell sequencing	Spatio-temporal landscape of mouse epididymal cells and specific mitochondria-rich segments defined by large-scale single-cell RNA-seq	Cbs	Cauda	no
Gja1		2				34001862	Single-cell sequencing	Spatio-temporal landscape of mouse epididymal cells and specific mitochondria-rich segments defined by large-scale single-cell RNA-seq	Serpine2	Cauda	no
Gm11728		2				34001862	Single-cell sequencing	Spatio-temporal landscape of mouse epididymal cells and specific mitochondria-rich segments defined by large-scale single-cell RNA-seq	Spink14	Cauda	yes	Cauda
Gm16136		2				34001862	Single-cell sequencing	Spatio-temporal landscape of mouse epididymal cells and specific mitochondria-rich segments defined by large-scale single-cell RNA-seq	Spinkl	Cauda	no
Gm3428		2				34001862	Single-cell sequencing	Spatio-temporal landscape of mouse epididymal cells and specific mitochondria-rich segments defined by large-scale single-cell RNA-seq	Clca3a2	Cauda	no
Gopc		2				34001862	Single-cell sequencing	Spatio-temporal landscape of mouse epididymal cells and specific mitochondria-rich segments defined by large-scale single-cell RNA-seq	Smarca1	Cauda	yes	Cauda
Ifitm2		2				34001862	Single-cell sequencing	Spatio-temporal landscape of mouse epididymal cells and specific mitochondria-rich segments defined by large-scale single-cell RNA-seq	Defb9	Cauda	no
Ifitm3		2				34001862	Single-cell sequencing	Spatio-temporal landscape of mouse epididymal cells and specific mitochondria-rich segments defined by large-scale single-cell RNA-seq	Anxa9	Cauda	no
Itm2c		2				34001862	Single-cell sequencing	Spatio-temporal landscape of mouse epididymal cells and specific mitochondria-rich segments defined by large-scale single-cell RNA-seq	Syn2	Cauda	no
Klrb1a		2				34001862	Single-cell sequencing	Spatio-temporal landscape of mouse epididymal cells and specific mitochondria-rich segments defined by large-scale single-cell RNA-seq	Clcn5	Cauda	no
Klrb1c		2				34001862	Single-cell sequencing	Spatio-temporal landscape of mouse epididymal cells and specific mitochondria-rich segments defined by large-scale single-cell RNA-seq	Akr1b7	VD	yes	VD
Krt23		2				34001862	Single-cell sequencing	Spatio-temporal landscape of mouse epididymal cells and specific mitochondria-rich segments defined by large-scale single-cell RNA-seq	Acta2	VD	no
Lamtor4		2				34001862	Single-cell sequencing	Spatio-temporal landscape of mouse epididymal cells and specific mitochondria-rich segments defined by large-scale single-cell RNA-seq	Csrp1	VD	no
Lcp1		2				34001862	Single-cell sequencing	Spatio-temporal landscape of mouse epididymal cells and specific mitochondria-rich segments defined by large-scale single-cell RNA-seq	Ptgs2	VD	yes	VD
Letm1		2				34001862	Single-cell sequencing	Spatio-temporal landscape of mouse epididymal cells and specific mitochondria-rich segments defined by large-scale single-cell RNA-seq	Myh11	VD	no
Lingo1		2				34001862	Single-cell sequencing	Spatio-temporal landscape of mouse epididymal cells and specific mitochondria-rich segments defined by large-scale single-cell RNA-seq	Flna	VD	no
Lrcol1		2				34001862	Single-cell sequencing	Spatio-temporal landscape of mouse epididymal cells and specific mitochondria-rich segments defined by large-scale single-cell RNA-seq	Tagln	VD	no
Mal		2				34001862	Single-cell sequencing	Spatio-temporal landscape of mouse epididymal cells and specific mitochondria-rich segments defined by large-scale single-cell RNA-seq	Cnn1	VD	no
Mup6		2				34001862	Single-cell sequencing	Spatio-temporal landscape of mouse epididymal cells and specific mitochondria-rich segments defined by large-scale single-cell RNA-seq	Mylk	VD	no
Obp2a		2				34001862	Single-cell sequencing	Spatio-temporal landscape of mouse epididymal cells and specific mitochondria-rich segments defined by large-scale single-cell RNA-seq	Myl9	VD	no
Pabpc1l		2				34001862	Single-cell sequencing	Spatio-temporal landscape of mouse epididymal cells and specific mitochondria-rich segments defined by large-scale single-cell RNA-seq	Hpgd	VD	yes	VD
Pemt		2				34001862	Single-cell sequencing	Spatio-temporal landscape of mouse epididymal cells and specific mitochondria-rich segments defined by large-scale single-cell RNA-seq	Abcg2	VD	no
Phf6		2				34001862	Single-cell sequencing	Spatio-temporal landscape of mouse epididymal cells and specific mitochondria-rich segments defined by large-scale single-cell RNA-seq	Slco2a1	VD	no
Plekha3		2				34001862	Single-cell sequencing	Spatio-temporal landscape of mouse epididymal cells and specific mitochondria-rich segments defined by large-scale single-cell RNA-seq	Tpm1	VD	no
Slc50a1		2				34001862	Single-cell sequencing	Spatio-temporal landscape of mouse epididymal cells and specific mitochondria-rich segments defined by large-scale single-cell RNA-seq	Des	VD	no
Syne1		2				34001862	Single-cell sequencing	Spatio-temporal landscape of mouse epididymal cells and specific mitochondria-rich segments defined by large-scale single-cell RNA-seq	Plac8	VD	no
Sytl4		2				34001862	Single-cell sequencing	Spatio-temporal landscape of mouse epididymal cells and specific mitochondria-rich segments defined by large-scale single-cell RNA-seq	Tpm2	VD	yes	VD
Teddm1b		2				34001862	Single-cell sequencing	Spatio-temporal landscape of mouse epididymal cells and specific mitochondria-rich segments defined by large-scale single-cell RNA-seq	Tns1	VD	no
Tmem150c		2				34001862	Single-cell sequencing	Spatio-temporal landscape of mouse epididymal cells and specific mitochondria-rich segments defined by large-scale single-cell RNA-seq	Qsox1	VD	no
Ucp2		2				34001862	Single-cell sequencing	Spatio-temporal landscape of mouse epididymal cells and specific mitochondria-rich segments defined by large-scale single-cell RNA-seq	Dmpk	VD	no
Sec11c		2				34001862	Single-cell sequencing	Spatio-temporal landscape of mouse epididymal cells and specific mitochondria-rich segments defined by large-scale single-cell RNA-seq
Nupr1		2				34001862	Single-cell sequencing	Spatio-temporal landscape of mouse epididymal cells and specific mitochondria-rich segments defined by large-scale single-cell RNA-seq
Prss23		2				34001862	Single-cell sequencing	Spatio-temporal landscape of mouse epididymal cells and specific mitochondria-rich segments defined by large-scale single-cell RNA-seq
Rassf4		2				34001862	Single-cell sequencing	Spatio-temporal landscape of mouse epididymal cells and specific mitochondria-rich segments defined by large-scale single-cell RNA-seq
1110008P14Rik		2				34001862	Single-cell sequencing	Spatio-temporal landscape of mouse epididymal cells and specific mitochondria-rich segments defined by large-scale single-cell RNA-seq
Crip2		2				34001862	Single-cell sequencing	Spatio-temporal landscape of mouse epididymal cells and specific mitochondria-rich segments defined by large-scale single-cell RNA-seq
Elovl6		2				34001862	Single-cell sequencing	Spatio-temporal landscape of mouse epididymal cells and specific mitochondria-rich segments defined by large-scale single-cell RNA-seq
Krt19		2				34001862	Single-cell sequencing	Spatio-temporal landscape of mouse epididymal cells and specific mitochondria-rich segments defined by large-scale single-cell RNA-seq
Rflnb		2				34001862	Single-cell sequencing	Spatio-temporal landscape of mouse epididymal cells and specific mitochondria-rich segments defined by large-scale single-cell RNA-seq
Srd5a2		2				34001862	Single-cell sequencing	Spatio-temporal landscape of mouse epididymal cells and specific mitochondria-rich segments defined by large-scale single-cell RNA-seq
Akr7a5		2				34001862	Single-cell sequencing	Spatio-temporal landscape of mouse epididymal cells and specific mitochondria-rich segments defined by large-scale single-cell RNA-seq
Bsg		2				34001862	Single-cell sequencing	Spatio-temporal landscape of mouse epididymal cells and specific mitochondria-rich segments defined by large-scale single-cell RNA-seq
Camk2b		2				34001862	Single-cell sequencing	Spatio-temporal landscape of mouse epididymal cells and specific mitochondria-rich segments defined by large-scale single-cell RNA-seq
Dbi		2				34001862	Single-cell sequencing	Spatio-temporal landscape of mouse epididymal cells and specific mitochondria-rich segments defined by large-scale single-cell RNA-seq
Ezr		2				34001862	Single-cell sequencing	Spatio-temporal landscape of mouse epididymal cells and specific mitochondria-rich segments defined by large-scale single-cell RNA-seq
Fcgr2b		2				34001862	Single-cell sequencing	Spatio-temporal landscape of mouse epididymal cells and specific mitochondria-rich segments defined by large-scale single-cell RNA-seq
Fkbp1a		2				34001862	Single-cell sequencing	Spatio-temporal landscape of mouse epididymal cells and specific mitochondria-rich segments defined by large-scale single-cell RNA-seq
Hprt		2				34001862	Single-cell sequencing	Spatio-temporal landscape of mouse epididymal cells and specific mitochondria-rich segments defined by large-scale single-cell RNA-seq
Iqgap2		2				34001862	Single-cell sequencing	Spatio-temporal landscape of mouse epididymal cells and specific mitochondria-rich segments defined by large-scale single-cell RNA-seq
Litaf		2				34001862	Single-cell sequencing	Spatio-temporal landscape of mouse epididymal cells and specific mitochondria-rich segments defined by large-scale single-cell RNA-seq
Pepd		2				34001862	Single-cell sequencing	Spatio-temporal landscape of mouse epididymal cells and specific mitochondria-rich segments defined by large-scale single-cell RNA-seq
Rem1		2				34001862	Single-cell sequencing	Spatio-temporal landscape of mouse epididymal cells and specific mitochondria-rich segments defined by large-scale single-cell RNA-seq
Rtcb		2				34001862	Single-cell sequencing	Spatio-temporal landscape of mouse epididymal cells and specific mitochondria-rich segments defined by large-scale single-cell RNA-seq
Serinc2		2				34001862	Single-cell sequencing	Spatio-temporal landscape of mouse epididymal cells and specific mitochondria-rich segments defined by large-scale single-cell RNA-seq
Skil		2				34001862	Single-cell sequencing	Spatio-temporal landscape of mouse epididymal cells and specific mitochondria-rich segments defined by large-scale single-cell RNA-seq
Slc7a5		2				34001862	Single-cell sequencing	Spatio-temporal landscape of mouse epididymal cells and specific mitochondria-rich segments defined by large-scale single-cell RNA-seq
Snx1		2				34001862	Single-cell sequencing	Spatio-temporal landscape of mouse epididymal cells and specific mitochondria-rich segments defined by large-scale single-cell RNA-seq
Tceal3		2				34001862	Single-cell sequencing	Spatio-temporal landscape of mouse epididymal cells and specific mitochondria-rich segments defined by large-scale single-cell RNA-seq
Tecta		2				34001862	Single-cell sequencing	Spatio-temporal landscape of mouse epididymal cells and specific mitochondria-rich segments defined by large-scale single-cell RNA-seq
Dnajc3		2				34001862	Single-cell sequencing	Spatio-temporal landscape of mouse epididymal cells and specific mitochondria-rich segments defined by large-scale single-cell RNA-seq
1700086L19Rik		2				34001862	Single-cell sequencing	Spatio-temporal landscape of mouse epididymal cells and specific mitochondria-rich segments defined by large-scale single-cell RNA-seq
Clec2m		2				34001862	Single-cell sequencing	Spatio-temporal landscape of mouse epididymal cells and specific mitochondria-rich segments defined by large-scale single-cell RNA-seq
Dnajc2		2				34001862	Single-cell sequencing	Spatio-temporal landscape of mouse epididymal cells and specific mitochondria-rich segments defined by large-scale single-cell RNA-seq
Rpl39l		2				34001862	Single-cell sequencing	Spatio-temporal landscape of mouse epididymal cells and specific mitochondria-rich segments defined by large-scale single-cell RNA-seq
Spata4		2				34001862	Single-cell sequencing	Spatio-temporal landscape of mouse epididymal cells and specific mitochondria-rich segments defined by large-scale single-cell RNA-seq
Atf3				2		34001862	Single-cell sequencing	Spatio-temporal landscape of mouse epididymal cells and specific mitochondria-rich segments defined by large-scale single-cell RNA-seq
Zfp36				2		34001862	Single-cell sequencing	Spatio-temporal landscape of mouse epididymal cells and specific mitochondria-rich segments defined by large-scale single-cell RNA-seq
Col3a1				2		34001862	Single-cell sequencing	Spatio-temporal landscape of mouse epididymal cells and specific mitochondria-rich segments defined by large-scale single-cell RNA-seq
Defb40				2		34001862	Single-cell sequencing	Spatio-temporal landscape of mouse epididymal cells and specific mitochondria-rich segments defined by large-scale single-cell RNA-seq
Gpx3				2		34001862	Single-cell sequencing	Spatio-temporal landscape of mouse epididymal cells and specific mitochondria-rich segments defined by large-scale single-cell RNA-seq
Ly6c1				2		34001862	Single-cell sequencing	Spatio-temporal landscape of mouse epididymal cells and specific mitochondria-rich segments defined by large-scale single-cell RNA-seq
Defb11				2		34001862	Single-cell sequencing	Spatio-temporal landscape of mouse epididymal cells and specific mitochondria-rich segments defined by large-scale single-cell RNA-seq
Id1				2		34001862	Single-cell sequencing	Spatio-temporal landscape of mouse epididymal cells and specific mitochondria-rich segments defined by large-scale single-cell RNA-seq
Ly6f				2		34001862	Single-cell sequencing	Spatio-temporal landscape of mouse epididymal cells and specific mitochondria-rich segments defined by large-scale single-cell RNA-seq
Aebp1				2		34001862	Single-cell sequencing	Spatio-temporal landscape of mouse epididymal cells and specific mitochondria-rich segments defined by large-scale single-cell RNA-seq
Nr4a1				2		34001862	Single-cell sequencing	Spatio-temporal landscape of mouse epididymal cells and specific mitochondria-rich segments defined by large-scale single-cell RNA-seq
Egr1				2		34001862	Single-cell sequencing	Spatio-temporal landscape of mouse epididymal cells and specific mitochondria-rich segments defined by large-scale single-cell RNA-seq
Junb				2		34001862	Single-cell sequencing	Spatio-temporal landscape of mouse epididymal cells and specific mitochondria-rich segments defined by large-scale single-cell RNA-seq
Klf2				2		34001862	Single-cell sequencing	Spatio-temporal landscape of mouse epididymal cells and specific mitochondria-rich segments defined by large-scale single-cell RNA-seq
Acot9			2			34001862	Single-cell sequencing	Spatio-temporal landscape of mouse epididymal cells and specific mitochondria-rich segments defined by large-scale single-cell RNA-seq
Car2			2			34001862	Single-cell sequencing	Spatio-temporal landscape of mouse epididymal cells and specific mitochondria-rich segments defined by large-scale single-cell RNA-seq
ccdc198			2			34001862	Single-cell sequencing	Spatio-temporal landscape of mouse epididymal cells and specific mitochondria-rich segments defined by large-scale single-cell RNA-seq
Comt			2			34001862	Single-cell sequencing	Spatio-temporal landscape of mouse epididymal cells and specific mitochondria-rich segments defined by large-scale single-cell RNA-seq
Gm13782			2			34001862	Single-cell sequencing	Spatio-temporal landscape of mouse epididymal cells and specific mitochondria-rich segments defined by large-scale single-cell RNA-seq
Gm34646			2			34001862	Single-cell sequencing	Spatio-temporal landscape of mouse epididymal cells and specific mitochondria-rich segments defined by large-scale single-cell RNA-seq
Gm42794			2			34001862	Single-cell sequencing	Spatio-temporal landscape of mouse epididymal cells and specific mitochondria-rich segments defined by large-scale single-cell RNA-seq
Gpr82			2			34001862	Single-cell sequencing	Spatio-temporal landscape of mouse epididymal cells and specific mitochondria-rich segments defined by large-scale single-cell RNA-seq
Gstm6			2			34001862	Single-cell sequencing	Spatio-temporal landscape of mouse epididymal cells and specific mitochondria-rich segments defined by large-scale single-cell RNA-seq
Odam			2			34001862	Single-cell sequencing	Spatio-temporal landscape of mouse epididymal cells and specific mitochondria-rich segments defined by large-scale single-cell RNA-seq
Pwwp3b			2			34001862	Single-cell sequencing	Spatio-temporal landscape of mouse epididymal cells and specific mitochondria-rich segments defined by large-scale single-cell RNA-seq
Ramp3			2			34001862	Single-cell sequencing	Spatio-temporal landscape of mouse epididymal cells and specific mitochondria-rich segments defined by large-scale single-cell RNA-seq
Scp2			2			34001862	Single-cell sequencing	Spatio-temporal landscape of mouse epididymal cells and specific mitochondria-rich segments defined by large-scale single-cell RNA-seq
Srgn			2			34001862	Single-cell sequencing	Spatio-temporal landscape of mouse epididymal cells and specific mitochondria-rich segments defined by large-scale single-cell RNA-seq
Aldh3a1			2			34001862	Single-cell sequencing	Spatio-temporal landscape of mouse epididymal cells and specific mitochondria-rich segments defined by large-scale single-cell RNA-seq
Gstm7			2			34001862	Single-cell sequencing	Spatio-temporal landscape of mouse epididymal cells and specific mitochondria-rich segments defined by large-scale single-cell RNA-seq
Spint3			2			34001862	Single-cell sequencing	Spatio-temporal landscape of mouse epididymal cells and specific mitochondria-rich segments defined by large-scale single-cell RNA-seq

## Sheet: Sheet3
highestSegment	gene
caput	9230105E05Rik
caput	Arpc2
caput	Bpi
caput	Ctnnbip1
caput	Cxxc5
caput	Cystm1
caput	Elovl4
caput	Fkbp11
caput	Gja1
caput	Gm11728
caput	Gm16136
caput	Gm3428
caput	Gopc
caput	Ifitm2
caput	Ifitm3
caput	Itm2c
caput	Klrb1a
caput	Klrb1c
caput	Krt23
caput	Lamtor4
caput	Lcp1
caput	Letm1
caput	Lingo1
caput	Lrcol1
caput	Mal
caput	Mup6
caput	Obp2a
caput	Pabpc1l
caput	Pemt
caput	Phf6
caput	Plekha3
caput	Slc50a1
caput	Syne1
caput	Sytl4
caput	Teddm1b
caput	Tmem150c
caput	Ucp2
caput	Sec11c
caput	Nupr1
caput	Prss23
caput	Rassf4
caput	1110008P14Rik
caput	Crip2
caput	Elovl6
caput	Krt19
caput	Rflnb
caput	Srd5a2
caput	Akr7a5
caput	Bsg
caput	Camk2b
caput	Dbi
caput	Ezr
caput	Fcgr2b
caput	Fkbp1a
caput	Hprt
caput	Iqgap2
caput	Litaf
caput	Pepd
caput	Rem1
caput	Rtcb
caput	Serinc2
caput	Skil
caput	Slc7a5
caput	Snx1
caput	Tceal3
caput	Tecta
caput	Dnajc3
caput	1700086L19Rik
caput	Clec2m
caput	Dnajc2
caput	Rpl39l
caput	Spata4
cauda	Atf3
cauda	Zfp36
cauda	Col3a1
cauda	Defb40
cauda	Gpx3
cauda	Ly6c1
cauda	Defb11
cauda	Id1
cauda	Ly6f
cauda	Aebp1
cauda	Nr4a1
cauda	Egr1
cauda	Junb
cauda	Klf2
corpus	Acot9
corpus	Car2
corpus	ccdc198
corpus	Comt
corpus	Gm13782
corpus	Gm34646
corpus	Gm42794
corpus	Gpr82
corpus	Gstm6
corpus	Odam
corpus	Pwwp3b
corpus	Ramp3
corpus	Scp2
corpus	Srgn
corpus	Aldh3a1
corpus	Gstm7
corpus	Spint3
