# Supplementary material for: Anatomical Transcriptome Atlas of the Male Mouse Reproductive System During Aging
Source: Front Cell Dev Biol. 2022 Feb 8;9:782824. doi: 10.3389/fcell.2021.782824 (PMC8861499; doi:10.3389/fcell.2021.782824)
Supplement: Supplementary file 8 [file Table1.XLSX]

## Sheet: Sheet1
List of the mRNA primers
Species	ID	Gene name	Product size (bp)	Direction	Sequence (5’ to 3’)
Human	NM_012400.4	PLA2G2D	237	Forward	GCAGAGGCCAACCCAAAGA
				Reverse	GCAGTCGCTTCTGGTAGGTGT
Mouse	NM_011109.3	Pla2g2d	220	Forward	GGCTCCTGAACCTGAACAAGATGG
				Reverse	GTGCCCTGGGAGATGCTGTATTTG
Mouse	NM_011210.4	Ptprc	201	Forward	AGACCCTCACCTGCTCCTC
				Reverse	CACCTCTGTCGCCTTAGCT
Mouse	NM_010693.3	Lck	293	Forward	GAAGGTGGCGGTGAAGAGT
				Reverse	GCAGGTCCCGATGGATGTAA
Mouse	NM_001038609.2	Mapt	292	Forward	CGGTGGACCTGAGCAAAGT
				Reverse	CTGAGGTGCCGTGGAGATG
Mouse	NM_010501.2	Ifit3	198	Forward	ATGGCAGAACTGAGACGAT
				Reverse	GTGGTACTCCTGGAGGTTG
Mouse	NM_008933.2	Prm2	229	Forward	CGAATGAGGAGCCCCAGTG
				Reverse	TGTGGCGGCAGGAGTGTC
Mouse	NM_013637.5	Prm1	120	Forward	AGCAAAAGCAGGAGCAGAT
				Reverse	ACACCTTATGGTGTATGAGCG
Mouse	NM_009420.2	Crisp2	204	Forward	CTTGGTTCCAGGTAATGC
				Reverse	TTGTTGCTTGTATGCTCC
Mouse	NM_009407.2	Tnp1	168	Forward	ATGTCGACCAGCCGCAAG
				Reverse	TCACAAGTGGGATCGGTAATTG
Mouse	NM_016901.3	Oaz3	206	Forward	CTTCCACTTTCGTCTTACC
				Reverse	GGGCACCTCTGTCCTT
Mouse	NM_009651.4	Akap4	268	Forward	TCTAAGACGGAGGGATC
				Reverse	CCATTTCTAGGCGAAGG
Mouse	NM_008757.3	Odf1	195	Forward	TGTTAGGAGGGACATAAAGAA
				Reverse	CAGCACGGGTAGTAGAGGT
Mouse	NM_013687.3	Tcp11	224	Forward	AGCAGCGAGAATACGGC
				Reverse	TGGTTGTGATGGGTCAGG
Mouse	NM_001290631.1	Gapdhs	215	Forward	ACCCACGGTTGAAGAACA
				Reverse	CAATGCGTCCAAATCCA
Mouse	NM_010082.2	Adam28	242	Forward	AGCCAGCATCAGCACC
				Reverse	CCATCCCATCATTCAACT
Mouse	NM_001011687.2	Rnase13	183	Forward	GGGATTCCACGGATACTGT
				Reverse	AAGGAGTTCTGAGTGAGGGT
Mouse	NM_001177401.1	Spint3	152	Forward	TGTGCCCAGGAAGTCCTTACCG
				Reverse	GGAAGTTGTTCTCGTTGCCTTTGC
Mouse	NM_001012704.1	Wfdc13	158	Forward	CCACAGCCAGTGCTTGGAAGTC
				Reverse	ACTATCCCACAGTAGGCGGAACAG
Mouse	NM_001160414.1	Wfdc9	165	Forward	GAAGCCTTGGATCATCGTCCTCAC
				Reverse	CTCACGCACTTCCGCACCTTC
