# Supplementary material for: Anatomical Transcriptome Atlas of the Male Mouse Reproductive System During Aging
Source: Front Cell Dev Biol. 2022 Feb 8;9:782824. doi: 10.3389/fcell.2021.782824 (PMC8861499; doi:10.3389/fcell.2021.782824)
Supplement: Supplementary file 9 [file Table10.XLSX]

## Sheet: Upregulated
Segment	ID	Description	GeneRatio	BgRatio	pvalue	p.adjust	qvalue	Count	Gene ID
Te	GO:0001819	Positive regulation of cytokine production	18/149	404/23843	8.41646e-11	1.94757e-07	1.59913e-07	18	Il23r/Tlr8/Cybb/Cd83/Fcer1g/C3/Egr1/Agt/Cd209b/Mbp/Ccr5/Zfp580/Cd209d/Mmp12/Ptafr/Runx1/Card11/Cd2
Te	GO:1903532	Positive regulation of secretion by cell	14/149	439/23843	7.1028e-07	0.000821795	0.000674766	14	Bmp6/Tlr8/Unc13a/Fcer1g/Avpr1a/Agt/Mbp/Ccr5/Cd209d/Mmp12/Apln/Ptafr/Runx1/Cd2
Te	GO:0032680	Regulation of tumor necrosis factor production	8/149	135/23843	2.18391e-06	0.00082947	0.000681069	8	Gpnmb/Trim30a/Cybb/Fcer1g/Cd209b/Ccr5/Ptafr/Cd2
Te	GO:0032640	Tumor necrosis factor production	8/149	137/23843	2.43856e-06	0.00082947	0.000681069	8	Gpnmb/Trim30a/Cybb/Fcer1g/Cd209b/Ccr5/Ptafr/Cd2
Te	GO:1903555	Regulation of tumor necrosis factor superfamily cytokine production	8/149	137/23843	2.43856e-06	0.00082947	0.000681069	8	Gpnmb/Trim30a/Cybb/Fcer1g/Cd209b/Ccr5/Ptafr/Cd2
Ed	GO:0001819	Positive regulation of cytokine production	71/1341	404/23843	7.89385e-18	2.37736e-14	1.95445e-14	71	Abcc8/Il23r/Slamf6/Slamf1/Cybb/Il27ra/Stat5b/Pf4/Il17rc/Il12rb1/Polr3d/Tnfrsf13c/Fcer1g/C3/Cd74/Tnf/Ltb/Tmem173/Nop53/Panx1/H2-M3/Cd209b/Slc11a1/Sash3/Pqbp1/Cyba/Ido1/Cd209d/Tnfsf9/Fcgr3/Ccl2/Syk/Hras/Ptger4/Carmil2/C1qtnf4/Hpse/Mmp12/Nlrp10/Ccl5/Mcoln2/Zfpm1/Prg2/Rasgrp1/Cebpb/Ptafr/Sod1/Runx1/Tnfrsf14/Unc93b1/Cd3e/Gsdmd/Spn/Card11/Card9/Park7/Hspb1/Hgf/Serpinf2/Ly9/Cd84/H2-T23/Stat5a/Ccr7/Clec4…
Ed	GO:0042110	T cell activation	79/1341	484/23843	9.58806e-18	2.37736e-14	1.95445e-14	79	Gpnmb/Itgal/Coro1a/Lat/Runx2/5830411N06Rik/Lfng/Slamf6/Slamf1/Hlx/Itk/Stat5b/Rhoh/Clec4d/Foxj1/Il12rb1/Cd5/Aire/Tnfrsf13c/Vsig4/Prr7/Fcer1g/Dock2/Blk/Cd74/H2-Ab1/H2-Oa/Lck/Itgb2/H2-M3/Psmb10/Pla2g2d/Zap70/Slc11a1/Ctla4/Il2rg/Was/Sash3/Ido1/Slc4a1/Cd209a/Tnfsf9/Znhit1/Ccl2/Prelid1/Syk/Lgals3/Ptger4/Carmil2/Ccr6/Themis/Mafb/Ccl5/Ebi3/Rasal3/Rasgrp1/Cebpb/Eomes/Tnfrsf14/Cd3e/Lmo1/Spn/H2-Aa/Card11/La…
Ed	GO:0007159	Leukocyte cell-cell adhesion	58/1341	301/23843	1.14118e-16	1.88638e-13	1.55081e-13	58	Gpnmb/Itgal/Coro1a/Slamf1/Hlx/Stat5b/Foxj1/Fermt3/Il12rb1/Cd5/Tnfrsf13c/Vsig4/Selplg/Cd74/H2-Ab1/Tnf/Lck/Itgb2/H2-M3/Pla2g2d/Zap70/Ctla4/Il2rg/Sash3/Ido1/Slc4a1/Tnfsf9/Ccl2/Syk/Gstp1/Lgals3/Carmil2/Itgb7/Ccl5/Rasal3/Rasgrp1/Cebpb/Ptafr/Tnfrsf14/Cd3e/Selp/Sele/Spn/H2-Aa/Card11/Lax1/Socs1/H2-T23/Ikzf1/Stat5a/Ccr7/Rac2/Podxl2/Ccdc88b/Il7r/Ptpn22/Cd4/Tnfaip8l2
Ed	GO:0070663	Regulation of leukocyte proliferation	48/1341	230/23843	1.99588e-15	2.21402e-12	1.82017e-12	48	Gpnmb/Itgal/Coro1a/Slamf1/Stat5b/Foxj1/Tnfrsf13b/Il12rb1/Tnfrsf13c/Vsig4/Cd74/H2-Ab1/Lst1/H2-M3/Pla2g2d/Inpp5d/Zap70/Ctla4/Sash3/Ido1/Slc4a1/Cd209a/Tnfsf9/Znhit1/Grem1/Syk/Gstp1/Lgals3/Carmil2/Ccl5/Rasal3/Ocstamp/Cebpb/Tnfrsf14/Cd3e/Lmo1/Spn/H2-Aa/Card11/H2-T23/Ikzf3/Stat5a/Ccr7/Rac2/Mif/Ccdc88b/Ptpn22/Cd4
Ed	GO:0050863	Regulation of T cell activation	55/1341	293/23843	2.30405e-15	2.21402e-12	1.82017e-12	55	Gpnmb/Itgal/Coro1a/Lat/Slamf1/Hlx/Stat5b/Foxj1/Il12rb1/Cd5/Tnfrsf13c/Vsig4/Cd74/H2-Ab1/H2-Oa/Lck/H2-M3/Pla2g2d/Zap70/Ctla4/Il2rg/Sash3/Ido1/Slc4a1/Cd209a/Tnfsf9/Znhit1/Ccl2/Prelid1/Syk/Lgals3/Carmil2/Ccl5/Rasal3/Rasgrp1/Cebpb/Tnfrsf14/Cd3e/Lmo1/Spn/H2-Aa/Card11/Lax1/Sit1/Socs1/H2-T23/Ikzf1/Stat5a/Ccr7/Rac2/Ccdc88b/Il7r/Ptpn22/Cd4/Tnfaip8l2
Is	GO:0007159	Leukocyte cell-cell adhesion	32/433	301/23843	1.03091e-15	3.70302e-12	2.92886e-12	32	Coro1a/Foxp3/Havcr2/Cd27/Lag3/Cd6/Tespa1/Selplg/Lck/Itgb2/Pla2g2d/Ptprc/L1cam/Tnfsf13b/Itgb7/Ccl5/Rasal3/Rasgrp1/Cd86/Tigit/Il2ra/Ripor2/Selp/Spn/Card11/Cd244/Rac2/Ccdc88b/Vcam1/Il7r/Cd4/Tnfaip8l2
Is	GO:0042110	T cell activation	38/433	484/23843	4.10724e-14	7.3766e-11	5.83444e-11	38	Coro1a/Foxp3/Itk/Havcr2/Cd27/Lag3/Cd6/Tespa1/Lck/Itgb2/Pla2g2d/Ptprc/Tnfsf13b/B2m/Zfp683/Themis/Ccl5/Rasal3/Sla2/Rasgrp1/Cd86/Tigit/Apbb1ip/Il2ra/Ripor2/Spn/Card11/Tnfsf8/Cd8a/Ly9/Cd244/Rac2/Ccdc88b/Vcam1/Cd2/Il7r/Cd4/Tnfaip8l2
Is	GO:0050863	Regulation of T cell activation	28/433	293/23843	9.42765e-13	9.99842e-10	7.90814e-10	28	Coro1a/Foxp3/Havcr2/Cd27/Lag3/Cd6/Tespa1/Lck/Pla2g2d/Ptprc/Tnfsf13b/Zfp683/Ccl5/Rasal3/Rasgrp1/Cd86/Tigit/Il2ra/Ripor2/Spn/Card11/Cd244/Rac2/Ccdc88b/Vcam1/Il7r/Cd4/Tnfaip8l2
Is	GO:0022407	Regulation of cell-cell adhesion	31/433	363/23843	1.11341e-12	9.99842e-10	7.90814e-10	31	Coro1a/Foxp3/Havcr2/Cd27/Lag3/Cd6/Tespa1/Lck/Il10/Pla2g2d/Ptprc/L1cam/Tnfsf13b/Ccl5/Rasal3/Rasgrp1/Cd86/Apoa1/Tigit/Il2ra/Ripor2/Spn/Card11/Adamts18/Cd244/Ccdc88b/Vcam1/Il7r/Cd4/Cxcl13/Tnfaip8l2
Is	GO:1903037	Regulation of leukocyte cell-cell adhesion	26/433	269/23843	4.81061e-12	3.45594e-09	2.73344e-09	26	Coro1a/Foxp3/Havcr2/Cd27/Lag3/Cd6/Tespa1/Lck/Pla2g2d/Ptprc/Tnfsf13b/Ccl5/Rasal3/Rasgrp1/Cd86/Tigit/Il2ra/Ripor2/Spn/Card11/Cd244/Ccdc88b/Vcam1/Il7r/Cd4/Tnfaip8l2
Ca	GO:0042110	T cell activation	36/648	484/23843	5.88527e-08	0.000224641	0.000205861	36	Gpnmb/Itgal/Coro1a/Lat/Slfn1/5830411N06Rik/Slamf6/Cd48/Cd83/Itk/Fancd2/Cd6/Lck/H2-M3/Pla2g2d/Ptprc/Sash3/Cd40lg/Hfe/Cd209a/Cxcr4/Zfp683/Themis/Nlrc3/Ccl5/Rasal3/Btla/Cd3d/Cd3e/Nckap1l/Spn/Slc46a2/Cd8a/Ly9/Vcam1/Il7r
Ca	GO:0050863	Regulation of T cell activation	26/648	293/23843	1.44115e-07	0.000275044	0.00025205	26	Gpnmb/Itgal/Coro1a/Lat/Slfn1/Cd83/Fancd2/Cd6/Lck/H2-M3/Pla2g2d/Ptprc/Sash3/Cd40lg/Hfe/Cd209a/Zfp683/Ccl5/Rasal3/Btla/Cd3e/Nckap1l/Spn/Slc46a2/Vcam1/Il7r
Ca	GO:0042129	Regulation of T cell proliferation	18/648	164/23843	5.64722e-07	0.000718515	0.000658447	18	Gpnmb/Itgal/Coro1a/Slfn1/Cd6/H2-M3/Pla2g2d/Ptprc/Sash3/Cd40lg/Cd209a/Ccl5/Rasal3/Btla/Cd3e/Nckap1l/Spn/Vcam1
Ca	GO:1903037	Regulation of leukocyte cell-cell adhesion	23/648	269/23843	1.42976e-06	0.00133749	0.00122568	23	Gpnmb/Itgal/Coro1a/Slfn1/Cd83/Cd6/Lck/H2-M3/Pla2g2d/Ptprc/Sash3/Cd40lg/Hfe/Ccl5/Rasal3/Btla/Ass1/Ptafr/Cd3e/Nckap1l/Spn/Vcam1/Il7r
Ca	GO:0042098	T cell proliferation	19/648	198/23843	2.15395e-06	0.00133749	0.00122568	19	Gpnmb/Itgal/Coro1a/Slfn1/Cd6/H2-M3/Pla2g2d/Ptprc/Sash3/Cd40lg/Cd209a/Cxcr4/Ccl5/Rasal3/Btla/Cd3e/Nckap1l/Spn/Vcam1
Co	GO:0050808	Synapse organization	25/521	337/23843	1.25732e-07	0.000486709	0.000434239	25	Sez6l2/P2rx2/Pcdhb14/Adgrb1/Srcin1/Adgrf1/Ngef/L1cam/Baiap2/Tnr/Oxtr/Snca/Tmem108/Bsn/Reln/Pclo/Kirrel3/Arc/Pcdhb11/Sptbn2/Pcdhb12/Mapt/Arhgap44/Slitrk5/Lzts3
Co	GO:0070661	Leukocyte proliferation	23/521	321/23843	7.35618e-07	0.00142379	0.0012703	23	Itgal/Slamf6/Foxj1/Il12rb1/Vsig4/Mzb1/Pla2g2d/Zap70/Ihh/Grem1/Cxcr4/Carmil2/Ccl5/Rasal3/Ripk3/Clu/Cd3e/Il2ra/Spn/Ikzf3/Ccr7/Crip3/Il7r
Co	GO:0042110	T cell activation	29/521	484/23843	1.12803e-06	0.00145553	0.00129862	29	Itgal/Stx11/5830411N06Rik/Slamf6/Itk/Foxj1/Il12rb1/Bcl11a/Cd5/Vsig4/Blk/Egr1/Lck/Pla2g2d/Zap70/Ihh/Cxcr4/Carmil2/Ccl5/Rasal3/Ripk3/Cd3e/Il2ra/Spn/Lax1/Cd8a/Ccr7/Crip3/Il7r
Co	GO:0042098	T cell proliferation	17/521	198/23843	1.83074e-06	0.0017717	0.0015807	17	Itgal/Foxj1/Il12rb1/Vsig4/Pla2g2d/Zap70/Ihh/Cxcr4/Carmil2/Ccl5/Rasal3/Ripk3/Cd3e/Il2ra/Spn/Ccr7/Crip3
Co	GO:0042129	Regulation of T cell proliferation	15/521	164/23843	3.37961e-06	0.00208318	0.0018586	15	Itgal/Foxj1/Il12rb1/Vsig4/Pla2g2d/Zap70/Ihh/Carmil2/Ccl5/Rasal3/Ripk3/Cd3e/Il2ra/Spn/Ccr7
Cd	GO:0035458	Cellular response to interferon-beta	12/413	39/23843	1.59608e-12	3.17811e-09	3.00712e-09	12	Igtp/Tgtp1/Ifi47/Gm4841/Iigp1/Ifit1/Gm4951/F830016B08Rik/Stat1/Irgm2/Ifit3/Gbp2
Cd	GO:0035456	Rresponse to interferon-beta	13/413	50/23843	2.07991e-12	3.17811e-09	3.00712e-09	13	Igtp/Tgtp1/Ifi47/Gm4841/Iigp1/Ifit1/Gm4951/F830016B08Rik/Stat1/Irgm2/Ifit3/Bst2/Gbp2
Cd	GO:0009615	Response to virus	21/413	261/23843	6.6222e-09	6.28121e-06	5.94326e-06	21	Ddx58/Il23r/Trim30a/Cxcl10/Ifit1/Mx1/Stat1/Irgm2/Gbp4/Isg15/Ifit3/Ccl5/Parp9/Trim34a/Bst2/Ifih1/Lcn2/Cd8a/Ifit1bl2/Ifit3b/Ddx60
Cd	GO:0051607	Defense response to virus	19/413	216/23843	8.22147e-09	6.28121e-06	5.94326e-06	19	Ddx58/Il23r/Trim30a/Cxcl10/Ifit1/Mx1/Stat1/Gbp4/Isg15/Ifit3/Ccl5/Parp9/Trim34a/Bst2/Ifih1/Cd8a/Ifit1bl2/Ifit3b/Ddx60
Cd	GO:0034341	Response to interferon-gamma	14/413	131/23843	6.84379e-08	4.18292e-05	3.95787e-05	14	Il23r/Tgtp1/Parp14/Ccl8/Aqp4/Stat1/Irgm2/Gbp4/Ubd/Ccl5/Parp9/Gbp10/Bst2/Gbp2
Dd	GO:0042110	T cell activation	152/1915	484/23843	2.07748e-51	1.14324e-47	8.54829e-48	152	Gpnmb/Itgal/Stx11/Txk/Coro1a/Rps3/Lat/Slfn1/Cd209e/Runx2/Sart1/Ccr9/Prex1/Gata3/Foxp3/Ager/Slamf6/Slamf1/Cd48/Cd83/Igfbp2/Foxp1/Itk/Ctla2a/Lgals1/Cdkn2a/Clec2i/Myb/Cd27/Rhoh/Lag3/Foxj1/Batf/Il12rb1/Vav1/Bcl11a/Cd5/Cd6/Aire/Icosl/Tcf7/Tnfrsf13c/Tespa1/Fcer1g/Dock2/Blk/Egr1/Cyp26b1/Igf2/Cd74/H2-Ab1/Aif1/Btnl2/H2-Oa/Lck/Itgb2/Bcl11b/Pdcd1lg2/H2-M3/Jak3/Chd7/Pla2g2d/Ptprc/Gpr183/Zap70/Cd80/Icos/Ctla4…
Dd	GO:0007159	Leukocyte cell-cell adhesion	103/1915	301/23843	9.27469e-39	2.55193e-35	1.90814e-35	103	Gpnmb/Itgal/Coro1a/Rps3/Slfn1/Cd209e/Sart1/Gata3/Foxp3/Ager/Slamf1/Cd83/Igfbp2/Stk10/Lgals1/Cdkn2a/Myb/Cd27/Lag3/Foxj1/Fermt3/Il12rb1/Cd5/Cd6/Icosl/Tnfrsf13c/Tespa1/Selplg/Igf2/Cd74/H2-Ab1/Tnf/Aif1/Btnl2/Lck/Itgb2/Pdcd1lg2/H2-M3/Jak3/Pla2g2d/Ptprc/Zap70/Cd80/Icos/Ctla4/Cd28/Il2rg/Sash3/Cd40lg/Ihh/Ido1/Ccl2/Syk/Tbx21/Zc3h12d/Lgals3/Carmil2/Itgb7/Lgals9/Ccl5/Cd177/Rasal3/Dock8/Btla/Itga4/Klf4/Ass1/…
Dd	GO:0030098	Lymphocyte differentiation	115/1915	386/23843	1.45596e-36	2.67072e-33	1.99697e-33	115	Txk/Runx2/Sart1/Hnf1a/Ccr9/Prex1/Clcf1/Gata3/Foxp3/Cd79b/Slamf6/Slamf1/Cd83/Foxp1/Itk/Ctla2a/Lgals1/Cdkn2a/Myb/Cd27/Rhoh/Foxj1/Batf/Hhex/Vav1/Bcl11a/Lyl1/Aire/Tcf7/Tespa1/Fcer1g/Dock2/Ly6d/Dock10/Blk/Egr1/Cyp26b1/Cd74/H2-Ab1/H2-Oa/Lck/Bcl11b/H2-M3/Jak3/Tox/Chd7/Pla2g2d/Ptprc/Inpp5d/Gpr183/Spi1/Zap70/Ctla4/Cd28/Il2rg/Btk/Zfp36l2/Sash3/Cd40lg/Gimap1/Pglyrp2/Ihh/Tlr9/Gadd45g/Syk/Irf4/Zfp36l1/B2m/Tbx…
Dd	GO:1903037	Regulation of leukocyte cell-cell adhesion	94/1915	269/23843	2.59972e-36	3.57657e-33	2.67429e-33	94	Gpnmb/Itgal/Coro1a/Rps3/Slfn1/Cd209e/Sart1/Gata3/Foxp3/Ager/Slamf1/Cd83/Igfbp2/Lgals1/Cdkn2a/Myb/Cd27/Lag3/Foxj1/Il12rb1/Cd5/Cd6/Icosl/Tnfrsf13c/Tespa1/Igf2/Cd74/H2-Ab1/Tnf/Aif1/Btnl2/Lck/Pdcd1lg2/H2-M3/Jak3/Pla2g2d/Ptprc/Zap70/Cd80/Icos/Ctla4/Cd28/Il2rg/Sash3/Cd40lg/Ihh/Ido1/Ccl2/Syk/Tbx21/Zc3h12d/Lgals3/Carmil2/Lgals9/Ccl5/Rasal3/Dock8/Btla/Itga4/Klf4/Ass1/Rasgrp1/Il1b/Cebpb/Zmiz1/Cd3e/Ets1/Thy…
Dd	GO:0050863	Regulation of T cell activation	98/1915	293/23843	5.71551e-36	6.29049e-33	4.70356e-33	98	Gpnmb/Itgal/Coro1a/Rps3/Lat/Slfn1/Cd209e/Sart1/Gata3/Foxp3/Ager/Slamf1/Cd83/Igfbp2/Ctla2a/Lgals1/Cdkn2a/Clec2i/Myb/Cd27/Lag3/Foxj1/Il12rb1/Cd5/Cd6/Icosl/Tnfrsf13c/Tespa1/Cyp26b1/Igf2/Cd74/H2-Ab1/Aif1/Btnl2/H2-Oa/Lck/Pdcd1lg2/H2-M3/Jak3/Pla2g2d/Ptprc/Zap70/Cd80/Icos/Ctla4/Cd28/Il2rg/Sash3/Cd40lg/Ihh/Ido1/Znhit1/Ccl2/Syk/Tbx21/Zc3h12d/Lgals3/Carmil2/Lgals9/Ccl5/Rasal3/Dock8/Btla/Rasgrp1/Il1b/Cebpb/…

## Sheet: Downregulated
Segment	ID	Description	GeneRatio	BgRatio	pvalue	p.adjust	qvalue	Count	gene ID
Te	GO:0043062	Extracellular structure organization	10/104	267/23843	2.71415e-07	0.000153759	0.000141226	10	Eln/Col1a2/Lpl/Lox/Crispld2/Col3a1/Col4a1/Col1a1/Mfap4/Pdpn
Te	GO:0031638	Zymogen activation	6/104	61/23843	2.72139e-07	0.000153759	0.000141226	6	Klk1b24/Klk1b16/Clec3b/Klk1b22/Klk1b21/Klk1b27
Te	GO:0030198	Extracellular matrix organization	9/104	222/23843	5.71131e-07	0.000215126	0.000197591	9	Eln/Col1a2/Lox/Crispld2/Col3a1/Col4a1/Col1a1/Mfap4/Pdpn
Te	GO:0003073	Regulation of systemic arterial blood pressure	6/104	114/23843	1.08472e-05	0.00306432	0.00281455	6	Klk1b24/F2r/Klk1b16/Klk1b22/Klk1b21/Klk1b27
Te	GO:0071229	Cellular response to acid chemical	8/104	268/23843	2.32995e-05	0.00465116	0.00427204	8	Col1a2/Pdk4/Col3a1/Col4a1/Col1a1/Rhox13/Ptger2/Aqp2
Ed	GO:0007059	Chromosome segregation	43/566	317/23843	2.11126e-20	8.63082e-17	6.96493e-17	43	Plk1/Cit/Ncaph/Msh4/Top2a/Spc25/Aurkb/Smc4/Brip1/Cdca2/Tex15/Kif14/Ccnb1/Gen1/Sgo2a/Spag5/Ska3/Mki67/Trip13/Cenpe/Kif18a/Ect2/Knl1/Nusap1/Bub1/Rad51c/Kif23/Cdc6/Brca1/Dscc1/Cenpf/Kif11/Smc2/Ttk/Cdca8/Ncapd2/Ccdc155/Stil/Rmi2/Oip5/Sgo1/Racgap1/Nsl1
Ed	GO:0000280	Nuclear division	47/566	416/23843	7.00463e-19	1.43175e-15	1.1554e-15	47	Plk1/Cntd1/Cit/Ncaph/Msh4/Top2a/Aurkb/Smc4/Brip1/Met/Kif20b/Igf1/Dazl/Tex15/Kif14/Ccnb1/Gen1/Sgo2a/Spag5/Mki67/Fignl1/Trip13/Cenpe/Mybl1/Mybl2/Kif18a/Tpx2/Rad51/Nusap1/Bub1/Rad51c/Kif23/Cdc6/Dscc1/Chek1/Mastl/Kif11/Smc2/Ttk/Cdca8/Ncapd2/Ccdc155/Stil/Aspm/Sgo1/Racgap1/Nsl1
Ed	GO:0098813	Nuclear chromosome segregation	36/566	252/23843	5.17405e-18	7.05051e-15	5.68964e-15	36	Plk1/Cit/Ncaph/Msh4/Top2a/Aurkb/Smc4/Brip1/Tex15/Kif14/Ccnb1/Gen1/Sgo2a/Spag5/Trip13/Cenpe/Kif18a/Ect2/Knl1/Nusap1/Bub1/Rad51c/Kif23/Cdc6/Dscc1/Cenpf/Smc2/Ttk/Cdca8/Ncapd2/Ccdc155/Stil/Rmi2/Sgo1/Racgap1/Nsl1
Ed	GO:0048285	Organelle fission	47/566	466/23843	6.57921e-17	6.72395e-14	5.42612e-14	47	Plk1/Cntd1/Cit/Ncaph/Msh4/Top2a/Aurkb/Smc4/Brip1/Met/Kif20b/Igf1/Dazl/Tex15/Kif14/Ccnb1/Gen1/Sgo2a/Spag5/Mki67/Fignl1/Trip13/Cenpe/Mybl1/Mybl2/Kif18a/Tpx2/Rad51/Nusap1/Bub1/Rad51c/Kif23/Cdc6/Dscc1/Chek1/Mastl/Kif11/Smc2/Ttk/Cdca8/Ncapd2/Ccdc155/Stil/Aspm/Sgo1/Racgap1/Nsl1
Ed	GO:0000819	Sister chromatid segregation	29/566	176/23843	1.91788e-16	1.56806e-13	1.26539e-13	29	Plk1/Cit/Ncaph/Top2a/Aurkb/Smc4/Kif14/Ccnb1/Gen1/Sgo2a/Spag5/Trip13/Cenpe/Kif18a/Nusap1/Bub1/Rad51c/Kif23/Cdc6/Dscc1/Smc2/Ttk/Cdca8/Ncapd2/Stil/Rmi2/Sgo1/Racgap1/Nsl1
Is	GO:0007283	Spermatogenesis	107/872	489/23843	1.61766e-52	6.13738e-49	5.93083e-49	107	D1Pas1/Fscn3/Zfp541/Ccdc136/Tdrd6/Fkbp6/Cit/Mael/Nr0b1/Prm3/Tdrd1/Sox30/Pdilt/Spata16/Mov10l1/Prss42/Tdrd9/Chd5/Theg/Piwil1/Slc22a16/Brdt/Spata20/Spata32/Tesmin/Tbata/Asz1/Dazl/Tex15/Sox8/H1fnt/Catsper1/Cabyr/Hils1/Tcfl5/Rnf17/Tssk3/Acsbg2/Serpina5/Tssk1/Spata19/Clgn/Capza3/Tnp1/Nlrp14/Ddx4/Nme8/Spem1/Adam18/4930447C04Rik/Dmrtc2/Boll/Spata9/Tssk2/Pxt1/Odf3/Catsperg2/Hist1h2ba/Mgat4d/Txndc2/Catspe…
Is	GO:0022412	Cellular process involved in reproduction in multicellular organism	69/872	368/23843	1.35673e-29	2.57372e-26	2.4871e-26	69	Fscn3/Ccdc136/Tdrd6/Hyal5/Fkbp6/Mael/Tdrd1/Pdilt/Mov10l1/Prss42/Tdrd9/Chd5/Ncaph/Piwil1/Top2a/Brdt/Igf1/Tbata/Asz1/Dazl/Tex15/H1fnt/Catsper1/Cabyr/Rnf17/Tssk3/Tssk1/Dpep3/Capza3/Tnp1/Bmp4/Ddx4/Spem1/4930447C04Rik/Sycp2/Dmrtc2/Boll/Tssk2/Hist1h2ba/Catsperz/Klhl10/Spata46/Aurka/Sun5/Bmpr1b/Zpbp2/Ropn1l/Stag3/Retn/Spesp1/Ropn1/Ddx25/Prm1/Meioc/Dpy19l2/Galntl5/Ttk/Prm2/Aspm/Tnp2/Ccdc63/Ybx2/Hfm1/Tssk…
Is	GO:0007281	Germ cell development	50/872	270/23843	1.73031e-21	2.18827e-18	2.11462e-18	50	Fscn3/Ccdc136/Tdrd6/Tdrd1/Pdilt/Prss42/Chd5/Piwil1/Igf1/Asz1/Dazl/H1fnt/Cabyr/Rnf17/Tssk3/Tssk1/Capza3/Tnp1/Bmp4/Spem1/4930447C04Rik/Dmrtc2/Boll/Tssk2/Hist1h2ba/Catsperz/Klhl10/Aurka/Sun5/Bmpr1b/Zpbp2/Ropn1l/Ropn1/Ddx25/Prm1/Meioc/Dpy19l2/Galntl5/Prm2/Aspm/Tnp2/Ccdc63/Ybx2/Hfm1/Tssk6/Nup210l/Sycp1/Adad1/Tcp11/Catsperb
Is	GO:0048515	Spermatid differentiation	38/872	165/23843	4.74988e-20	3.83357e-17	3.70456e-17	38	Fscn3/Ccdc136/Pdilt/Chd5/Piwil1/Tbata/H1fnt/Cabyr/Rnf17/Tssk3/Tssk1/Capza3/Tnp1/Spem1/Dmrtc2/Tssk2/Hist1h2ba/Catsperz/Klhl10/Sun5/Zpbp2/Ropn1l/Ropn1/Ddx25/Prm1/Meioc/Dpy19l2/Galntl5/Prm2/Tnp2/Ccdc63/Ybx2/Tssk6/Nup210l/Sycp1/Adad1/Tcp11/Catsperb
Is	GO:0007286	Spermatid development	37/872	156/23843	5.05215e-20	3.83357e-17	3.70456e-17	37	Fscn3/Ccdc136/Pdilt/Chd5/Piwil1/H1fnt/Cabyr/Rnf17/Tssk3/Tssk1/Capza3/Tnp1/Spem1/Dmrtc2/Tssk2/Hist1h2ba/Catsperz/Klhl10/Sun5/Zpbp2/Ropn1l/Ropn1/Ddx25/Prm1/Meioc/Dpy19l2/Galntl5/Prm2/Tnp2/Ccdc63/Ybx2/Tssk6/Nup210l/Sycp1/Adad1/Tcp11/Catsperb
Ca	GO:0030198	Extracellular matrix organization	43/811	222/23843	1.28839e-20	5.62899e-17	4.85928e-17	43	Tgfb2/Eln/Col1a2/Fscn1/Pxdn/Ctgf/Nid1/Emilin1/Loxl2/Lox/Sox9/Has3/Sulf1/Fn1/Col5a2/Col3a1/Fbln1/Col27a1/Col4a3/Col4a1/Serpinh1/Adamts14/Col1a1/Npnt/Adamtsl4/Abi3bp/Creb3l1/Thsd4/Loxl1/Mfap4/Ccdc80/Itga8/Adamtsl2/Dpt/Adamts2/Lum/Col5a1/Myh11/Col4a4/Bcl3/Col5a3/Col11a1/Postn
Ca	GO:0043062	Extracellular structure organization	45/811	267/23843	5.20924e-19	1.13796e-15	9.82353e-16	45	Tgfb2/Eln/Col1a2/Fscn1/Lpl/Pxdn/Apob/Ctgf/Nid1/Emilin1/Loxl2/Lox/Sox9/Has3/Sulf1/Fn1/Col5a2/Col3a1/Fbln1/Col27a1/Col4a3/Col4a1/Serpinh1/Adamts14/Col1a1/Npnt/Adamtsl4/Abi3bp/Creb3l1/Thsd4/Loxl1/Mfap4/Ccdc80/Itga8/Adamtsl2/Dpt/Adamts2/Lum/Col5a1/Myh11/Col4a4/Bcl3/Col5a3/Col11a1/Postn
Ca	GO:0001655	Urogenital system development	40/811	333/23843	4.84238e-12	7.05212e-09	6.08781e-09	40	Tgfb2/Gata2/Arl3/Gata3/Myocd/Nid1/Serpinf1/Agtr2/Igf1/Egr1/Sox9/Gli2/Bmper/Sulf1/Cited1/Basp1/Vcan/Ednra/Col4a3/Col4a1/Irx1/Npnt/Rarg/Tfap2b/Fbn1/Stra6/Heyl/Myc/Osr2/Wnt7b/Itga8/Cenpf/Emx2/Tnc/Pax2/Dchs2/Col4a4/Enpep/Lhx1/Cdkn1c
Ca	GO:0030199	Collagen fibril organization	15/811	45/23843	1.10635e-11	1.20841e-08	1.04317e-08	15	Tgfb2/Col1a2/Loxl2/Lox/Col5a2/Col3a1/Serpinh1/Adamts14/Col1a1/Loxl1/Dpt/Adamts2/Lum/Col5a1/Col11a1
Ca	GO:0060537	Muscle tissue development	46/811	445/23843	2.41207e-11	2.10767e-08	1.81947e-08	46	Tgfb2/Nupr1/Nexn/Eln/Slc8a1/Nr2f2/Srf/Hlx/Myocd/Trip10/Klf5/Wisp1/Tcf7l2/Agtr2/Meis1/Igf1/Sox11/Pi16/Tenm4/Egr1/Sox9/Speg/Col3a1/Twist1/Asb2/Gli1/Foxl2/Emd/Ccm2l/Stra6/Arid1a/Heyl/Myc/Zfpm2/Dner/Akap6/Hdac7/Itga8/Cenpf/Tnnt2/Myh11/Bcl9l/Kdm6b/Myo18b/Prkg1/Col11a1
Co	GO:0030198	Extracellular matrix organization	39/442	222/23843	1.11658e-26	4.14252e-23	3.35915e-23	39	Tgfb2/Eln/Col1a2/Ndnf/Pxdn/Nid1/Pdgfra/Loxl2/Cyp1b1/Olfml2b/Lox/Agt/Fn1/Col5a2/Col3a1/Gpm6b/Fbln1/Col4a3/Col4a1/Serpinh1/Col1a1/Npnt/Loxl4/Loxl1/Mfap4/Has2/Col14a1/Itga8/Adamtsl2/Dpt/Adamts2/Lum/Col5a1/Col4a4/Col5a3/Thbs3/Ecm2/Col11a1/Postn
Co	GO:0043062	Extracellular structure organization	41/442	267/23843	1.24816e-25	2.31534e-22	1.8775e-22	41	Tgfb2/Eln/Col1a2/Ndnf/Lpl/Pxdn/Nid1/Pdgfra/Loxl2/Cyp1b1/Olfml2b/Lox/Agt/Fn1/Col5a2/Col3a1/Gpm6b/Fbln1/Col4a3/Col4a1/Serpinh1/Col1a1/Npnt/Loxl4/Loxl1/Mfap4/Has2/Col14a1/Itga8/Adamtsl2/Dpt/Adamts2/Lum/Col5a1/Col4a4/Col5a3/Thbs3/Ecm2/Pla2g7/Col11a1/Postn
Co	GO:0030199	Collagen fibril organization	17/442	45/23843	1.82069e-18	2.25158e-15	1.8258e-15	17	Tgfb2/Col1a2/Loxl2/Cyp1b1/Lox/Col5a2/Col3a1/Serpinh1/Col1a1/Loxl4/Loxl1/Col14a1/Dpt/Adamts2/Lum/Col5a1/Col11a1
Co	GO:0001525	Angiogenesis	36/442	492/23843	2.89564e-12	2.68571e-09	2.17783e-09	36	Ptn/Tgfb2/Adam12/Ndnf/Ephb3/Aplnr/Dcn/Pdgfra/Lif/Loxl2/Serpinf1/Cyp1b1/Agt/Bmper/Angptl4/Fn1/Ccr5/Wnt5a/Tmem100/Tnmd/Mmp2/Ednra/Col4a3/Col4a1/Calcrl/Ceacam1/Htatip2/Ccr2/Loxl4/E2f8/Cnmd/F3/Enpep/Sparc/Lef1/Cysltr1
Co	GO:0001655	Urogenital system development	28/442	333/23843	3.32829e-11	2.46959e-08	2.00258e-08	28	Tgfb2/Ephb3/Nid1/Pdgfra/Lif/Rbp4/Serpinf1/Pcsk5/Agtr2/Igf1/Agt/Bmper/Wnt5a/Ren1/Fgf10/Vcan/Mmp2/Ednra/Col4a3/Col4a1/Npnt/Fbn1/Gcnt4/Heyl/Pdgfd/Itga8/Col4a4/Enpep
Cd	GO:0001501	Skeletal system development	72/911	490/23843	5.68289e-23	2.56866e-19	1.94355e-19	72	Hapln3/Tmem119/Ryr1/Prrx2/Alx4/Ndst1/Rflnb/Mgp/Loxl2/Ltbp3/Mmp14/Pcsk5/Col13a1/Igf1/Fmn1/Chst11/Fbn2/Zfp385a/Pdgfrb/Msx1/Gli2/Osr1/Pkdcc/Chrd/Sulf1/Sp5/Col9a1/Fst/Vcan/Actn3/Serpinh1/Pitx1/Ror2/Tgfb3/Sfrp4/Sh3pxd2b/Fam20c/Phospho1/Clec3b/Hoxc6/Hoxc8/Fbn1/Snai1/Rassf2/Chsy1/Pth1r/Adamts7/Twist2/Dhrs3/Mdfi/Has2/Osr2/Dchs1/Bmp1/Cnmd/Scube2/Hoxc5/Hoxc10/Vdr/Cacna1s/Npr2/Alpl/Hspg2/P3h1/Fgf18/Thbs3/Sp…
Cd	GO:0001525	Angiogenesis	70/911	492/23843	1.51304e-21	3.41947e-18	2.5873e-18	70	Gata6/Ephb4/Notch4/Sash1/Ephb3/Itgb3/Sema6a/Anxa3/Tnfrsf1a/Pecam1/Loxl2/Serpinf1/E2f7/Ptprb/Tbxa2r/S100a1/Adra2b/Itga5/Pdgfrb/Ecscr/Pparg/Fap/Gpx1/Cd34/Mmrn2/Bmper/Sulf1/Angptl4/Fn1/Tmem100/Srpx2/Tnmd/Ednra/Col4a2/Col4a1/Slit2/Angpt2/Adgra2/Ccr3/Vash1/Mmp19/Ramp2/C5ar1/Angpt4/Ptgis/Cspg4/Hspb6/E2f8/Cnmd/Col8a2/Mcam/Robo1/Robo4/Sox18/Egfl7/Nos3/Adgrb2/Hspg2/Aqp1/Ephb2/Fgf18/Ecm1/Ntrk1/Sparc/Kdr/Nf…
Cd	GO:0003012	Muscle system process	59/911	375/23843	1.70681e-20	2.57159e-17	1.94576e-17	59	Gata6/Atp2a1/Tnnt1/Slc8a1/Ryr1/Fkbp1b/Myocd/Smtn/Dmpk/Kcnj8/Cacna1g/Grip2/Wisp1/Tpcn2/Agtr2/Tbxa2r/Igf1/Dbn1/Adra2b/Pi16/Mybpc2/Sulf1/Htr2b/Obsl1/Igfbp5/Tnni2/Pde9a/Ednra/Hmcn2/Myom2/Actn3/Acta2/Snta1/Mylk2/Actn2/Stac/Myh1/Hcn4/Tnnc2/Col14a1/Myl1/Tnnt3/Akap6/Atp1a2/Casq1/Ttn/Cacna1s/Fxyd1/Nos3/Hrc/Klk1b1/Adra2a/Myh7/Cmya5/Ryr3/Kcna1/Myh2/Gja5/Myl2
Cd	GO:0030198	Extracellular matrix organization	44/911	222/23843	1.56553e-19	1.76904e-16	1.33853e-16	44	Fbln2/Eln/Itgb3/Pxdn/Nid1/Emilin1/Loxl2/Loxl3/Fam234a/Olfml2b/Lox/Fap/Crispld2/Sulf1/Fn1/Fbln1/Thbs4/Col4a1/Serpinh1/Adamts14/Fbln5/Ramp2/Kazald1/Adamtsl4/Sh3pxd2b/Creb3l1/Col6a4/Loxl1/Has2/Col14a1/Ccdc80/Dpt/Lamc1/Adamts2/Col5a1/Plod3/Hspg2/P3h1/Col5a3/Thbs3/Tnxb/Smoc2/Sfrp2/Postn
Cd	GO:0043062	Extracellular structure organization	48/911	267/23843	2.46186e-19	2.22552e-16	1.68391e-16	48	Fbln2/Eln/Itgb3/Pxdn/Nid1/Emilin1/Loxl2/Loxl3/Fam234a/Olfml2b/Lox/Fap/Cd34/Crispld2/Sulf1/Fn1/Fbln1/Thbs4/Col4a1/Serpinh1/Adamts14/Fbln5/Ramp2/Kazald1/Adamtsl4/Sh3pxd2b/Creb3l1/Col6a4/Loxl1/Has2/Col14a1/Gpihbp1/Ccdc80/Dpt/Lamc1/Adamts2/Col5a1/Plod3/Hspg2/Pla2g2e/P3h1/Col5a3/Thbs3/Tnxb/Smoc2/Sfrp2/Postn/Scarb1
Dd	GO:0043062	Extracellular structure organization	34/602	267/23843	9.41288e-15	2.33438e-11	1.93522e-11	34	Eln/Col1a2/Lpl/Pdgfra/Olfml2b/Lox/Fap/Cd34/Crispld2/Col5a2/Col3a1/Gpm6b/Col4a3/Fbln5/Col1a1/Npnt/Hpse2/Mmp13/Egflam/Mfap4/Col14a1/Cma1/Rgcc/Ccdc80/Adamtsl2/Dpt/Adamts2/Lum/Col5a1/Col4a4/Col5a3/Thbs3/Ecm2/Pla2g7
Dd	GO:0030198	Extracellular matrix organization	31/602	222/23843	1.12582e-14	2.33438e-11	1.93522e-11	31	Eln/Col1a2/Pdgfra/Olfml2b/Lox/Fap/Crispld2/Col5a2/Col3a1/Gpm6b/Col4a3/Fbln5/Col1a1/Npnt/Hpse2/Mmp13/Egflam/Mfap4/Col14a1/Cma1/Rgcc/Ccdc80/Adamtsl2/Dpt/Adamts2/Lum/Col5a1/Col4a4/Col5a3/Thbs3/Ecm2
Dd	GO:0001525	Angiogenesis	38/602	492/23843	1.2325e-09	1.70373e-06	1.41241e-06	38	Tspan12/Adam12/Aplnr/Pdgfra/Col8a1/E2f7/Ptprb/Itga5/Pdgfrb/Fap/Cd34/Bmper/Clec14a/Srpx2/Tnmd/Bmp4/Mmp2/Col4a3/Calcrl/Mmp19/Ccr2/Isl1/Cma1/Cnmd/Rgcc/Emp2/Prkd1/Egfl7/Hgf/Tal1/Aqp1/Lepr/Efna3/Enpep/Egf/Sparc/Adgrb3/Tie1
Dd	GO:0015850	Organic hydroxy compound transport	23/602	221/23843	1.09496e-08	1.1352e-05	9.41088e-06	23	Abcg2/Ptger3/Abcg5/Igfbp3/Cnr1/Htr2a/Fcer1a/Slco1a4/Rbp4/Pgap1/Nat8l/Syt4/Gpm6b/Slc6a2/Snca/Abcb11/C1qtnf1/Gdnf/Pon1/Aqp1/Crhr1/Egf/Npy2r
Dd	GO:0015893	Drug transport	21/602	193/23843	2.18003e-08	1.80812e-05	1.49894e-05	21	Aoc1/Abcg2/Abcg5/Cnr1/Htr2a/Slc7a10/Slc17a8/Slc1a3/Rbp4/Nat8l/Syt4/Slc38a5/Slc6a2/Snca/Fzd4/Folr1/Abcb11/Gdnf/Retn/Aqp1/Npy2r
