# Supplementary material for: Anatomical Transcriptome Atlas of the Male Mouse Reproductive System During Aging
Source: Front Cell Dev Biol. 2022 Feb 8;9:782824. doi: 10.3389/fcell.2021.782824 (PMC8861499; doi:10.3389/fcell.2021.782824)
Supplement: Supplementary file 10 [file Table5.XLSX]

## Sheet: GO analysis (top5)
Segment	GOID	GOTerm	DifGene	AllDifGene	GeneInGO	AllGene	P-value	FDR	Enrichment	(-log10P)
Te	GO:0007283	spermatogenesis	140	1939	363	21424	1.31238e-53	3.78885e-50	4.26132	52.8819
Te	GO:0007049	cell cycle	138	1939	607	21424	7.80983e-25	1.12735e-21	2.51196	24.1074
Te	GO:0007286	spermatid development	39	1939	73	21424	4.91333e-22	4.72826e-19	5.90289	21.3086
Te	GO:0007067	mitotic nuclear division	76	1939	264	21424	1.98726e-20	1.4343e-17	3.18077	19.7017
Te	GO:0051301	cell division	89	1939	358	21424	4.91373e-19	2.83719e-16	2.74682	18.3086
Ed	GO:0042493	Response to drug	34	805	344	21424	3.06758e-07	0.000482485	2.63042	6.5132
Ed	GO:0055085	Transmembrane transport	42	805	478	21424	3.35642e-07	0.000482485	2.33844	6.47412
Ed	GO:0070328	Triglyceride homeostasis	8	805	22	21424	7.68098e-07	0.000736094	9.6777	6.11458
Ed	GO:0009749	Response to glucose	14	805	81	21424	1.75914e-06	0.00113797	4.59989	5.7547
Ed	GO:0030104	Water homeostasis	4	805	4	21424	1.97907e-06	0.00113797	26.6137	5.70354
Is	GO:0007169	transmembrane receptor protein tyrosine kinase signaling pathway	9	381	99	21424	6.84896e-05	0.0356699	5.11191	4.16438
Is	GO:0006486	protein glycosylation	11	381	154	21424	0.000101216	0.0356699	4.0165	3.99475
Is	GO:0009649	entrainment of circadian clock	3	381	6	21424	0.000107249	0.0356699	28.1155	3.96961
Is	GO:0060762	regulation of branching involved in mammary gland duct morphogenesis	3	381	6	21424	0.000107249	0.0356699	28.1155	3.96961
Is	GO:0007194	negative regulation of adenylate cyclase activity	4	381	15	21424	0.000115064	0.0356699	14.9949	3.93906
Ca	GO:0006952	defense response	10	241	128	21424	1.91393e-06	0.00176273	6.94502	5.71807
Ca	GO:0042742	defense response to bacterium	10	241	142	21424	4.886e-06	0.00225	6.2603	5.31105
Ca	GO:0007218	neuropeptide signaling pathway	9	241	125	21424	1.22392e-05	0.00375743	6.40053	4.91225
Ca	GO:0035725	sodium ion transmembrane transport	7	241	100	21424	0.000137581	0.0316779	6.22274	3.86144
Ca	GO:0006885	regulation of pH	4	241	27	21424	0.000223626	0.0411919	13.1698	3.65048
Co	GO:0006564	L-serine biosynthetic process	3	332	4	21424	1.45837e-05	0.00902352	48.3976	4.83613
Co	GO:0055114	oxidation-reduction process	29	332	783	21424	1.46486e-05	0.00902352	2.39	4.8342
Co	GO:0042742	defense response to bacterium	10	332	142	21424	7.61196e-05	0.0312598	4.54437	4.1185
Co	GO:0019464	glycine decarboxylation via glycine cleavage system	2	332	2	21424	0.000239434	0.0589965	64.5301	3.62081
Co	GO:0014718	positive regulation of satellite cell activation involved in skeletal muscle regeneration	2	332	2	21424	0.000239434	0.0589965	64.5301	3.62081
Cd	GO:0006935	chemotaxis	13	247	123	21424	1.8522e-09	2.26524e-06	9.16731	8.73231
Cd	GO:0006955	immune response	17	247	259	21424	9.49508e-09	5.80624e-06	5.69315	8.0225
Cd	GO:0030595	leukocyte chemotaxis	5	247	12	21424	1.45038e-07	5.9127e-05	36.1404	6.83852
Cd	GO:0006954	inflammatory response	15	247	283	21424	1.11884e-06	0.000342084	4.59736	5.95123
Cd	GO:0090026	positive regulation of monocyte chemotaxis	4	247	11	21424	5.33991e-06	0.00130614	31.5407	5.27247
Dd	GO:0071805	potassium ion transmembrane transport	19	474	130	21424	7.83275e-11	1.21977e-07	6.60591	10.1061
Dd	GO:0006813	potassium ion transport	19	474	133	21424	1.17455e-10	1.21977e-07	6.4569	9.93013
Dd	GO:0006811	ion transport	40	474	618	21424	1.50564e-09	1.04241e-06	2.92546	8.82228
Dd	GO:0055085	transmembrane transport	32	474	478	21424	3.17671e-08	1.64951e-05	3.02583	7.49802
Dd	GO:0034765	regulation of ion transmembrane transport	18	474	179	21424	1.01574e-07	4.21938e-05	4.54508	6.99322

## Sheet: Te
GOID	GOTerm	QueryID	Symbol	Description	P-Value	FDR	Enrichment
GO:0007283	Spermatogenesis	Tbata	Tbata	Protein TBATA	1.31238e-53	3.78885e-50	4.26132
GO:0007283	Spermatogenesis	Trip13	Trip13	Pachytene checkpoint protein 2 homolog	1.31238e-53	3.78885e-50	4.26132
GO:0007283	Spermatogenesis	Ggn	Ggn	MCG51479, isoform CRA_b	1.31238e-53	3.78885e-50	4.26132
GO:0007283	Spermatogenesis	Herc4	Herc4	Probable E3 ubiquitin-protein ligase HERC4	1.31238e-53	3.78885e-50	4.26132
GO:0007283	Spermatogenesis	Spem1	Spem1	Spermatid maturation protein 1	1.31238e-53	3.78885e-50	4.26132
GO:0007283	Spermatogenesis	Tssk2	Tssk2	Testis-specific serine/threonine-protein kinase 2	1.31238e-53	3.78885e-50	4.26132
GO:0007283	Spermatogenesis	Mycbpap	Mycbpap	MYCBP-associated protein	1.31238e-53	3.78885e-50	4.26132
GO:0007283	Spermatogenesis	Spata32	Spata32	Spermatogenesis-associated protein 32	1.31238e-53	3.78885e-50	4.26132
GO:0007283	Spermatogenesis	Rpl39l	Rpl39l	RIKEN cDNA 4930517K11	1.31238e-53	3.78885e-50	4.26132
GO:0007283	Spermatogenesis	Racgap1	Racgap1	Rac GTPase-activating protein 1	1.31238e-53	3.78885e-50	4.26132
GO:0007283	Spermatogenesis	Adam18	Adam18	A disintegrin and metallopeptidase domain 18	1.31238e-53	3.78885e-50	4.26132
GO:0007283	Spermatogenesis	Rnf151	Rnf151	RING finger protein 151	1.31238e-53	3.78885e-50	4.26132
GO:0007283	Spermatogenesis	Gpx4	Gpx4	Phospholipid hydroperoxide glutathione peroxidase, mitochondrial	1.31238e-53	3.78885e-50	4.26132
GO:0007283	Spermatogenesis	Catsperd	Catsperd	Cation channel sperm-associated protein subunit delta	1.31238e-53	3.78885e-50	4.26132
GO:0007283	Spermatogenesis	Zfp105	Zfp105	Protein Zfp105	1.31238e-53	3.78885e-50	4.26132
GO:0007283	Spermatogenesis	Ddx25	Ddx25	ATP-dependent RNA helicase DDX25	1.31238e-53	3.78885e-50	4.26132
GO:0007283	Spermatogenesis	Spata20	Spata20	Spermatogenesis-associated protein 20	1.31238e-53	3.78885e-50	4.26132
GO:0007283	Spermatogenesis	Bag6	Bag6	Large proline-rich protein BAG6	1.31238e-53	3.78885e-50	4.26132
GO:0007283	Spermatogenesis	D1Pas1	D1Pas1	DNA segment, Chr 1, Pasteur Institute 1	1.31238e-53	3.78885e-50	4.26132
GO:0007283	Spermatogenesis	Wdr48	Wdr48	WD repeat-containing protein 48	1.31238e-53	3.78885e-50	4.26132
GO:0007283	Spermatogenesis	Tdrd12	Tdrd12	Putative ATP-dependent RNA helicase TDRD12	1.31238e-53	3.78885e-50	4.26132
GO:0007283	Spermatogenesis	Brca2	Brca2	Breast cancer type 2 susceptibility protein homolog	1.31238e-53	3.78885e-50	4.26132
GO:0007283	Spermatogenesis	Rnf17	Rnf17	RING finger protein 17	1.31238e-53	3.78885e-50	4.26132
GO:0007283	Spermatogenesis	Spata18	Spata18	Mitochondria-eating protein	1.31238e-53	3.78885e-50	4.26132
GO:0007283	Spermatogenesis	Txndc2	Txndc2	Thioredoxin domain-containing protein 2	1.31238e-53	3.78885e-50	4.26132
GO:0007283	Spermatogenesis	Hfm1	Hfm1	Hfm1 protein	1.31238e-53	3.78885e-50	4.26132
GO:0007283	Spermatogenesis	Ccdc33	Ccdc33	Coiled-coil domain-containing protein 33	1.31238e-53	3.78885e-50	4.26132
GO:0007283	Spermatogenesis	Cabs1	Cabs1	Calcium-binding and spermatid-specific protein 1	1.31238e-53	3.78885e-50	4.26132
GO:0007283	Spermatogenesis	Atp1a4	Atp1a4	Na+/K+ ATPase alpha 4 subunit	1.31238e-53	3.78885e-50	4.26132
GO:0007283	Spermatogenesis	Hils1	Hils1	Histone H1-like protein in spermatids 1	1.31238e-53	3.78885e-50	4.26132
GO:0007283	Spermatogenesis	Tyro3	Tyro3	Tyrosine-protein kinase receptor TYRO3	1.31238e-53	3.78885e-50	4.26132
GO:0007283	Spermatogenesis	Zscan21	Zscan21	Zinc finger and SCAN domain-containing protein 21	1.31238e-53	3.78885e-50	4.26132
GO:0007283	Spermatogenesis	Adcy10	Adcy10	Adenylate cyclase type 10	1.31238e-53	3.78885e-50	4.26132
GO:0007283	Spermatogenesis	Aspm	Aspm	Abnormal spindle-like microcephaly associated splice variant 1	1.31238e-53	3.78885e-50	4.26132
GO:0007283	Spermatogenesis	Tcp11	Tcp11	T-complex protein 11	1.31238e-53	3.78885e-50	4.26132
GO:0007283	Spermatogenesis	Zscan2	Zscan2	Zinc finger and SCAN domain-containing protein 2	1.31238e-53	3.78885e-50	4.26132
GO:0007283	Spermatogenesis	Ggnbp1	Ggnbp1	Gametogenetin-binding protein 1	1.31238e-53	3.78885e-50	4.26132
GO:0007283	Spermatogenesis	Micalcl	Micalcl	MICAL C-terminal-like protein	1.31238e-53	3.78885e-50	4.26132
GO:0007283	Spermatogenesis	Oaz3	Oaz3	Ornithine decarboxylase antizyme 3	1.31238e-53	3.78885e-50	4.26132
GO:0007283	Spermatogenesis	Ttll5	Ttll5	Tubulin polyglutamylase TTLL5	1.31238e-53	3.78885e-50	4.26132
GO:0007283	Spermatogenesis	Mei4	Mei4	Meiosis-specific protein MEI4-like	1.31238e-53	3.78885e-50	4.26132
GO:0007283	Spermatogenesis	Taf4b	Taf4b	Transcription initiation factor TFIID subunit 4B	1.31238e-53	3.78885e-50	4.26132
GO:0007283	Spermatogenesis	Spag6	Spag6	Sperm associated antigen 6	1.31238e-53	3.78885e-50	4.26132
GO:0007283	Spermatogenesis	Mea1	Mea1	Male-enhanced antigen 1	1.31238e-53	3.78885e-50	4.26132
GO:0007283	Spermatogenesis	Cnbd2	Cnbd2	Cyclic nucleotide-binding domain-containing protein 2	1.31238e-53	3.78885e-50	4.26132
GO:0007283	Spermatogenesis	Tdrd6	Tdrd6	Tdrd6 protein	1.31238e-53	3.78885e-50	4.26132
GO:0007283	Spermatogenesis	Nphp1	Nphp1	Nephrocystin 1 variant 1	1.31238e-53	3.78885e-50	4.26132
GO:0007283	Spermatogenesis	Dbil5	Dbil5	Diazepam-binding inhibitor-like 5	1.31238e-53	3.78885e-50	4.26132
GO:0007283	Spermatogenesis	Bmp8b	Bmp8b	Bone morphogenetic protein 8B	1.31238e-53	3.78885e-50	4.26132
GO:0007283	Spermatogenesis	Aqp7	Aqp7	Aquaporin-7	1.31238e-53	3.78885e-50	4.26132
GO:0007283	Spermatogenesis	Tcfl5	Tcfl5	Protein Tcfl5	1.31238e-53	3.78885e-50	4.26132
GO:0007283	Spermatogenesis	Nme8	Nme8	Thioredoxin domain-containing protein 3	1.31238e-53	3.78885e-50	4.26132
GO:0007283	Spermatogenesis	Tesk1	Tesk1	Dual-specificity testis-specific protein kinase 1	1.31238e-53	3.78885e-50	4.26132
GO:0007283	Spermatogenesis	Pax5	Pax5	Paired box protein Pax-5	1.31238e-53	3.78885e-50	4.26132
GO:0007283	Spermatogenesis	Rad51c	Rad51c	DNA repair protein RAD51 homolog 3	1.31238e-53	3.78885e-50	4.26132
GO:0007283	Spermatogenesis	Tdrd1	Tdrd1	Tudor domain-containing protein 1	1.31238e-53	3.78885e-50	4.26132
GO:0007283	Spermatogenesis	Tsnaxip1	Tsnaxip1	Translin-associated factor X-interacting protein 1	1.31238e-53	3.78885e-50	4.26132
GO:0007283	Spermatogenesis	Ccna1	Ccna1	Cyclin-A1	1.31238e-53	3.78885e-50	4.26132
GO:0007283	Spermatogenesis	Cit	Cit	Citron Rho-interacting kinase	1.31238e-53	3.78885e-50	4.26132
GO:0007283	Spermatogenesis	Zmynd15	Zmynd15	Zinc finger, MYND-type containing 15	1.31238e-53	3.78885e-50	4.26132
GO:0007283	Spermatogenesis	Msh4	Msh4	MutS protein homolog 4	1.31238e-53	3.78885e-50	4.26132
GO:0007283	Spermatogenesis	Hspa1l	Hspa1l	Inducible heat shock protein 70	1.31238e-53	3.78885e-50	4.26132
GO:0007283	Spermatogenesis	Acsbg2	Acsbg2	Long-chain-fatty-acid--CoA ligase ACSBG2	1.31238e-53	3.78885e-50	4.26132
GO:0007283	Spermatogenesis	Spata19	Spata19	Spermatogenesis associated 19, isoform CRA_a	1.31238e-53	3.78885e-50	4.26132
GO:0007283	Spermatogenesis	H1fnt	H1fnt	Testis-specific H1 histone	1.31238e-53	3.78885e-50	4.26132
GO:0007283	Spermatogenesis	Meig1	Meig1	Meiosis-expressed gene 1 protein	1.31238e-53	3.78885e-50	4.26132
GO:0007283	Spermatogenesis	Zfp35	Zfp35	Mszf20-1	1.31238e-53	3.78885e-50	4.26132
GO:0007283	Spermatogenesis	Tssk3	Tssk3	Testis-specific serine/threonine-protein kinase 3	1.31238e-53	3.78885e-50	4.26132
GO:0007283	Spermatogenesis	Gykl1	Gykl1	Glycerol kinase-like 1	1.31238e-53	3.78885e-50	4.26132
GO:0007283	Spermatogenesis	Dpy19l2	Dpy19l2	Probable C-mannosyltransferase DPY19L2	1.31238e-53	3.78885e-50	4.26132
GO:0007283	Spermatogenesis	Ccnb1	Ccnb1	Cyclin b1 variant 1	1.31238e-53	3.78885e-50	4.26132
GO:0007283	Spermatogenesis	Immp2l	Immp2l	Mitochondrial inner membrane protease subunit 2	1.31238e-53	3.78885e-50	4.26132
GO:0007283	Spermatogenesis	Ccin	Ccin	Calicin	1.31238e-53	3.78885e-50	4.26132
GO:0007283	Spermatogenesis	Zfp37	Zfp37	Zinc finger protein 37	1.31238e-53	3.78885e-50	4.26132
GO:0007283	Spermatogenesis	Klhl10	Klhl10	Kelch-like 10 (Drosophila)	1.31238e-53	3.78885e-50	4.26132
GO:0007283	Spermatogenesis	Usp42	Usp42	Ubiquitin carboxyl-terminal hydrolase 42	1.31238e-53	3.78885e-50	4.26132
GO:0007283	Spermatogenesis	Slc26a8	Slc26a8	Testis anion transporter 1	1.31238e-53	3.78885e-50	4.26132
GO:0007283	Spermatogenesis	Crem	Crem	cAMP-responsive element modulator	1.31238e-53	3.78885e-50	4.26132
GO:0007283	Spermatogenesis	1110017D15Rik	1110017D15Rik	Protein 1110017D15Rik	1.31238e-53	3.78885e-50	4.26132
GO:0007283	Spermatogenesis	Catsperg2	Catsperg2	Cation channel sperm-associated protein subunit gamma 2	1.31238e-53	3.78885e-50	4.26132
GO:0007283	Spermatogenesis	Tssk4	Tssk4	Testis-specific serine kinase 4, isoform CRA_b	1.31238e-53	3.78885e-50	4.26132
GO:0007283	Spermatogenesis	Dmc1	Dmc1	Disrupted meiotic cDNA 1 homolog, isoform CRA_a	1.31238e-53	3.78885e-50	4.26132
GO:0007283	Spermatogenesis	Prm3	Prm3	Protamine-3	1.31238e-53	3.78885e-50	4.26132
GO:0007283	Spermatogenesis	Brdt	Brdt	Putative uncharacterized protein	1.31238e-53	3.78885e-50	4.26132
GO:0007283	Spermatogenesis	Odf4	Odf4	Outer dense fiber protein 4	1.31238e-53	3.78885e-50	4.26132
GO:0007283	Spermatogenesis	Catsper2	Catsper2	Cation channel sperm-associated protein 2	1.31238e-53	3.78885e-50	4.26132
GO:0007283	Spermatogenesis	Hist1h1a	Hist1h1a	Histone H1.1	1.31238e-53	3.78885e-50	4.26132
GO:0007283	Spermatogenesis	Zfp41	Zfp41	Zinc finger protein 41	1.31238e-53	3.78885e-50	4.26132
GO:0007283	Spermatogenesis	Pld6	Pld6	Mitochondrial cardiolipin hydrolase	1.31238e-53	3.78885e-50	4.26132
GO:0007283	Spermatogenesis	Tssk1	Tssk1	Testis-specific serine/threonine-protein kinase 1	1.31238e-53	3.78885e-50	4.26132
GO:0007283	Spermatogenesis	Nme5	Nme5	Nucleoside diphosphate kinase homolog 5	1.31238e-53	3.78885e-50	4.26132
GO:0007283	Spermatogenesis	Slc22a16	Slc22a16	MCG123504	1.31238e-53	3.78885e-50	4.26132
GO:0007283	Spermatogenesis	Spata25	Spata25	Spermatogenesis-associated protein 25	1.31238e-53	3.78885e-50	4.26132
GO:0007283	Spermatogenesis	Zfp39	Zfp39	Zinc finger protein 39	1.31238e-53	3.78885e-50	4.26132
GO:0007283	Spermatogenesis	Nr6a1	Nr6a1	Nuclear receptor subfamily 6 group A member 1	1.31238e-53	3.78885e-50	4.26132
GO:0007283	Spermatogenesis	Chd5	Chd5	Chromodomain-helicase-DNA-binding protein 5	1.31238e-53	3.78885e-50	4.26132
GO:0007283	Spermatogenesis	Dzip1	Dzip1	Putative uncharacterized protein	1.31238e-53	3.78885e-50	4.26132
GO:0007283	Spermatogenesis	Spag16	Spag16	Uncharacterized protein	1.31238e-53	3.78885e-50	4.26132
GO:0007283	Spermatogenesis	Nlrp14	Nlrp14	NACHT, LRR and PYD domains-containing protein 14	1.31238e-53	3.78885e-50	4.26132
GO:0007283	Spermatogenesis	Diaph3	Diap3	Protein diaphanous homolog 3	1.31238e-53	3.78885e-50	4.26132
GO:0007283	Spermatogenesis	H2afx	H2afx	Histone H2AX	1.31238e-53	3.78885e-50	4.26132
GO:0007283	Spermatogenesis	Ybx3	Ybx3	DbpA murine homologue	1.31238e-53	3.78885e-50	4.26132
GO:0007283	Spermatogenesis	M1ap	M1ap	Meiosis 1 arrest protein	1.31238e-53	3.78885e-50	4.26132
GO:0007283	Spermatogenesis	Tssk6	Tssk6	Testis-specific serine/threonine-protein kinase 6	1.31238e-53	3.78885e-50	4.26132
GO:0007283	Spermatogenesis	Pgam2	Pgam2	Phosphoglycerate mutase 2, isoform CRA_b	1.31238e-53	3.78885e-50	4.26132
GO:0007283	Spermatogenesis	Hook1	Hook1	Protein Hook homolog 1	1.31238e-53	3.78885e-50	4.26132
GO:0007283	Spermatogenesis	Tbpl1	Tbpl1	TATA box-binding protein-like protein 1	1.31238e-53	3.78885e-50	4.26132
GO:0007283	Spermatogenesis	Catsper3	Catsper3	Cation channel sperm-associated protein 3 transcript variant 1	1.31238e-53	3.78885e-50	4.26132
GO:0007283	Spermatogenesis	Chtf18	Chtf18	Chromosome transmission fidelity protein 18 homolog	1.31238e-53	3.78885e-50	4.26132
GO:0007283	Spermatogenesis	Odf1	Odf1	Odf1 protein	1.31238e-53	3.78885e-50	4.26132
GO:0007283	Spermatogenesis	Sox30	Sox30	Transcription factor SOX-30	1.31238e-53	3.78885e-50	4.26132
GO:0007283	Spermatogenesis	Catsper4	Catsper4	Catsper 4 retinal variant B	1.31238e-53	3.78885e-50	4.26132
GO:0007283	Spermatogenesis	C330027C09Rik	C330027C09Rik	Protein C330027C09Rik	1.31238e-53	3.78885e-50	4.26132
GO:0007283	Spermatogenesis	Cldn11	Cldn11	Claudin-11	1.31238e-53	3.78885e-50	4.26132
GO:0007283	Spermatogenesis	Tnp1	Tnp1	Spermatid nuclear transition protein 1	1.31238e-53	3.78885e-50	4.26132
GO:0007283	Spermatogenesis	Prdx4	Prdx4	Peroxiredoxin-4	1.31238e-53	3.78885e-50	4.26132
GO:0007283	Spermatogenesis	Spaca1	Spaca1	Sperm acrosome membrane-associated protein 1	1.31238e-53	3.78885e-50	4.26132
GO:0007283	Spermatogenesis	Prm1	Prm1	Sperm protamine P1	1.31238e-53	3.78885e-50	4.26132
GO:0007283	Spermatogenesis	Insl6	Insl6	Insulin-like 6	1.31238e-53	3.78885e-50	4.26132
GO:0007283	Spermatogenesis	Tex15	Tex15	Protein Tex15	1.31238e-53	3.78885e-50	4.26132
GO:0007283	Spermatogenesis	Tdrd7	Tdrd7	Putative uncharacterized protein	1.31238e-53	3.78885e-50	4.26132
GO:0007283	Spermatogenesis	Spata9	Spata9	Spermatogenesis-associated protein 9	1.31238e-53	3.78885e-50	4.26132
GO:0007283	Spermatogenesis	Rad18	Rad18	E3 ubiquitin-protein ligase RAD18	1.31238e-53	3.78885e-50	4.26132
GO:0007283	Spermatogenesis	Piwil2	Piwil2	Piwi-like protein 2	1.31238e-53	3.78885e-50	4.26132
GO:0007283	Spermatogenesis	Calr3	Calr3	Calsperin	1.31238e-53	3.78885e-50	4.26132
GO:0007283	Spermatogenesis	Tdrd5	Tdrd5	Tudor domain-containing protein 5	1.31238e-53	3.78885e-50	4.26132
GO:0007283	Spermatogenesis	Prm2	Prm2	Protamine-2	1.31238e-53	3.78885e-50	4.26132
GO:0007283	Spermatogenesis	Spata24	Spata24	Spermatogenesis-associated protein 24	1.31238e-53	3.78885e-50	4.26132
GO:0007283	Spermatogenesis	Hist1h1t	Hist1h1t	Histone cluster 1, H1t	1.31238e-53	3.78885e-50	4.26132
GO:0007283	Spermatogenesis	Creb3l4	Creb3l4	Cyclic AMP-responsive element-binding protein 3-like protein 4	1.31238e-53	3.78885e-50	4.26132
GO:0007283	Spermatogenesis	Sox8	Sox8	Transcription factor SOX-8	1.31238e-53	3.78885e-50	4.26132
GO:0007283	Spermatogenesis	Mael	Mael	Protein maelstrom homolog	1.31238e-53	3.78885e-50	4.26132
GO:0007283	Spermatogenesis	Odf2	Odf2	Outer dense fiber protein 2	1.31238e-53	3.78885e-50	4.26132
GO:0007283	Spermatogenesis	Tnp2	Tnp2	Nuclear transition protein 2	1.31238e-53	3.78885e-50	4.26132
GO:0007283	Spermatogenesis	Txnrd3	Txnrd3	Thioredoxin reductase 3	1.31238e-53	3.78885e-50	4.26132
GO:0007283	Spermatogenesis	Galntl5	Galntl5	Inactive polypeptide N-acetylgalactosaminyltransferase-like protein 5	1.31238e-53	3.78885e-50	4.26132
GO:0007283	Spermatogenesis	Tesmin	Mtl5	MCG3887, isoform CRA_a	1.31238e-53	3.78885e-50	4.26132
GO:0007283	Spermatogenesis	Spata6	Spata6	Spata6 protein	1.31238e-53	3.78885e-50	4.26132
GO:0007283	Spermatogenesis	Cdc25c	Cdc25c	M-phase inducer phosphatase 3	1.31238e-53	3.78885e-50	4.26132
GO:0007283	Spermatogenesis	Zfp541	Zfp541	Zinc finger protein 541	1.31238e-53	3.78885e-50	4.26132
GO:0007049	Cell cycle	Kif2b	Kif2b	Kinesin-like protein KIF2B	7.80983e-25	1.12735e-21	2.51196
GO:0007049	Cell cycle	Aurkb	Aurkb	Aurora kinase B	7.80983e-25	1.12735e-21	2.51196
GO:0007049	Cell cycle	Brca1	Brca1	Breast cancer type 1 susceptibility protein homolog	7.80983e-25	1.12735e-21	2.51196
GO:0007049	Cell cycle	Esco2	Esco2	Putative uncharacterized protein	7.80983e-25	1.12735e-21	2.51196
GO:0007049	Cell cycle	Dbf4	Dbf4	DBF4 homolog (S. cerevisiae)	7.80983e-25	1.12735e-21	2.51196
GO:0007049	Cell cycle	Ncapd2	Ncapd2	Condensin complex subunit 1	7.80983e-25	1.12735e-21	2.51196
GO:0007049	Cell cycle	Racgap1	Racgap1	Rac GTPase-activating protein 1	7.80983e-25	1.12735e-21	2.51196
GO:0007049	Cell cycle	Knstrn	Knstrn	DNA segment, Chr 2, ERATO Doi 750, expressed, isoform CRA_c	7.80983e-25	1.12735e-21	2.51196
GO:0007049	Cell cycle	Tex14	Tex14	Inactive serine/threonine-protein kinase TEX14	7.80983e-25	1.12735e-21	2.51196
GO:0007049	Cell cycle	Cdkn2c	Cdkn2c	Putative uncharacterized protein	7.80983e-25	1.12735e-21	2.51196
GO:0007049	Cell cycle	Smc4	Smc4	Structural maintenance of chromosomes protein 4	7.80983e-25	1.12735e-21	2.51196
GO:0007049	Cell cycle	Ndc80	Ndc80	Kinetochore protein NDC80 homolog	7.80983e-25	1.12735e-21	2.51196
GO:0007049	Cell cycle	Ube2c	Ube2c	Ubiquitin-conjugating enzyme E2C	7.80983e-25	1.12735e-21	2.51196
GO:0007049	Cell cycle	Katnb1	Katnb1	Katanin p80 WD40 repeat-containing subunit B1	7.80983e-25	1.12735e-21	2.51196
GO:0007049	Cell cycle	Cdk20	Cdk20	Cyclin-dependent kinase 20	7.80983e-25	1.12735e-21	2.51196
GO:0007049	Cell cycle	Rcc1	Rcc1	Regulator of chromosome condensation	7.80983e-25	1.12735e-21	2.51196
GO:0007049	Cell cycle	Kif20b	Kif20b	Kinesin-like protein KIF20B	7.80983e-25	1.12735e-21	2.51196
GO:0007049	Cell cycle	Pim1	Pim1	Serine/threonine-protein kinase pim-1	7.80983e-25	1.12735e-21	2.51196
GO:0007049	Cell cycle	Sept4	Sept4	Septin-4	7.80983e-25	1.12735e-21	2.51196
GO:0007049	Cell cycle	Ccnf	Ccnf	Cyclin-F	7.80983e-25	1.12735e-21	2.51196
GO:0007049	Cell cycle	Cdc14a	Cdc14a	Dual specificity protein phosphatase CDC14A	7.80983e-25	1.12735e-21	2.51196
GO:0007049	Cell cycle	Ddias	Ddias	DNA damage-induced apoptosis suppressor protein	7.80983e-25	1.12735e-21	2.51196
GO:0007049	Cell cycle	Syce2	Syce2	Synaptonemal complex central element protein 2	7.80983e-25	1.12735e-21	2.51196
GO:0007049	Cell cycle	Mcm7	Mcm7	DNA replication licensing factor MCM7	7.80983e-25	1.12735e-21	2.51196
GO:0007049	Cell cycle	Ppm1g	Ppm1g	Protein phosphatase 1G	7.80983e-25	1.12735e-21	2.51196
GO:0007049	Cell cycle	Lrrcc1	Lrrcc1	Leucine-rich repeat and coiled-coil domain-containing protein 1	7.80983e-25	1.12735e-21	2.51196
GO:0007049	Cell cycle	Brca2	Brca2	Breast cancer type 2 susceptibility protein homolog	7.80983e-25	1.12735e-21	2.51196
GO:0007049	Cell cycle	Bub1	Bub1	Mitotic checkpoint serine/threonine-protein kinase BUB1	7.80983e-25	1.12735e-21	2.51196
GO:0007049	Cell cycle	Plk1	Plk1	Polo like kinase	7.80983e-25	1.12735e-21	2.51196
GO:0007049	Cell cycle	Spdl1	Spdl1	Protein Spindly	7.80983e-25	1.12735e-21	2.51196
GO:0007049	Cell cycle	Mis18bp1	Mis18bp1	Putative uncharacterized protein	7.80983e-25	1.12735e-21	2.51196
GO:0007049	Cell cycle	Spag5	Spag5	S17 protein	7.80983e-25	1.12735e-21	2.51196
GO:0007049	Cell cycle	Mad2l2	Mad2l2	Mitotic spindle assembly checkpoint protein MAD2B	7.80983e-25	1.12735e-21	2.51196
GO:0007049	Cell cycle	Cdkn3	Cdkn3	Cyclin-dependent kinase inhibitor 3	7.80983e-25	1.12735e-21	2.51196
GO:0007049	Cell cycle	Nek2	Nek2	Serine/threonine-protein kinase Nek2	7.80983e-25	1.12735e-21	2.51196
GO:0007049	Cell cycle	Zwilch	Zwilch	Protein zwilch homolog	7.80983e-25	1.12735e-21	2.51196
GO:0007049	Cell cycle	Dynlt1b	Dynlt1b	Dynein light chain Tctex-type 1	7.80983e-25	1.12735e-21	2.51196
GO:0007049	Cell cycle	Siah2	Siah2	E3 ubiquitin-protein ligase SIAH2	7.80983e-25	1.12735e-21	2.51196
GO:0007049	Cell cycle	Cenpv	Cenpv	Centromere protein V	7.80983e-25	1.12735e-21	2.51196
GO:0007049	Cell cycle	Aspm	Aspm	Abnormal spindle-like microcephaly associated splice variant 1	7.80983e-25	1.12735e-21	2.51196
GO:0007049	Cell cycle	Nsl1	Nsl1	Kinetochore-associated protein NSL1 homolog	7.80983e-25	1.12735e-21	2.51196
GO:0007049	Cell cycle	Ppm1d	Ppm1d	Protein phosphatase 1D	7.80983e-25	1.12735e-21	2.51196
GO:0007049	Cell cycle	Oip5	Oip5	Protein Mis18-beta	7.80983e-25	1.12735e-21	2.51196
GO:0007049	Cell cycle	Uhrf1	Uhrf1	E3 ubiquitin-protein ligase UHRF1	7.80983e-25	1.12735e-21	2.51196
GO:0007049	Cell cycle	Ccnb2	Ccnb2	G2/mitotic-specific cyclin-B2	7.80983e-25	1.12735e-21	2.51196
GO:0007049	Cell cycle	Cdc34	Cdc34	Ubiquitin-conjugating enzyme E2 R1	7.80983e-25	1.12735e-21	2.51196
GO:0007049	Cell cycle	Hells	Hells	Lymphocyte-specific helicase	7.80983e-25	1.12735e-21	2.51196
GO:0007049	Cell cycle	Ckap2	Ckap2	Cytoskeleton-associated protein 2	7.80983e-25	1.12735e-21	2.51196
GO:0007049	Cell cycle	Kntc1	Kntc1	Kinetochore-associated protein 1	7.80983e-25	1.12735e-21	2.51196
GO:0007049	Cell cycle	Prc1	Prc1	Protein regulator of cytokinesis 1, isoform CRA_e	7.80983e-25	1.12735e-21	2.51196
GO:0007049	Cell cycle	Foxm1	Foxm1	Forkhead box protein M1	7.80983e-25	1.12735e-21	2.51196
GO:0007049	Cell cycle	Dlgap5	Dlgap5	Disks large-associated protein 5	7.80983e-25	1.12735e-21	2.51196
GO:0007049	Cell cycle	Ncaph	Ncaph	Condensin complex subunit 2	7.80983e-25	1.12735e-21	2.51196
GO:0007049	Cell cycle	Cdc7	Cdc7	Cell division cycle 7 (S. cerevisiae), isoform CRA_a	7.80983e-25	1.12735e-21	2.51196
GO:0007049	Cell cycle	Kif11	Kif11	Kinesin-like protein KIF11	7.80983e-25	1.12735e-21	2.51196
GO:0007049	Cell cycle	Cenpw	Cenpw	MCG20021	7.80983e-25	1.12735e-21	2.51196
GO:0007049	Cell cycle	Nup37	Nup37	Nucleoporin Nup37	7.80983e-25	1.12735e-21	2.51196
GO:0007049	Cell cycle	Mtbp	Mtbp	Mdm2-binding protein	7.80983e-25	1.12735e-21	2.51196
GO:0007049	Cell cycle	Tpx2	Tpx2	Targeting protein for Xklp2	7.80983e-25	1.12735e-21	2.51196
GO:0007049	Cell cycle	Ccna1	Ccna1	Cyclin-A1	7.80983e-25	1.12735e-21	2.51196
GO:0007049	Cell cycle	Ect2	Ect2	Protein ECT2	7.80983e-25	1.12735e-21	2.51196
GO:0007049	Cell cycle	Sept10	Sept10	Septin-10	7.80983e-25	1.12735e-21	2.51196
GO:0007049	Cell cycle	Lin9	Lin9	Protein lin-9 homolog	7.80983e-25	1.12735e-21	2.51196
GO:0007049	Cell cycle	Cit	Cit	Citron Rho-interacting kinase	7.80983e-25	1.12735e-21	2.51196
GO:0007049	Cell cycle	Cdc45	Cdc45	Cell division control protein 45 homolog	7.80983e-25	1.12735e-21	2.51196
GO:0007049	Cell cycle	Syce1	Syce1	Synaptonemal complex central element protein 1	7.80983e-25	1.12735e-21	2.51196
GO:0007049	Cell cycle	Nuf2	Nuf2	Kinetochore protein Nuf2	7.80983e-25	1.12735e-21	2.51196
GO:0007049	Cell cycle	Dscc1	Dscc1	Protein Dscc1	7.80983e-25	1.12735e-21	2.51196
GO:0007049	Cell cycle	Birc5	Birc5	Baculoviral IAP repeat-containing protein 5	7.80983e-25	1.12735e-21	2.51196
GO:0007049	Cell cycle	Ccnb1	Ccnb1	Cyclin b1 variant 1	7.80983e-25	1.12735e-21	2.51196
GO:0007049	Cell cycle	Cdc20	Cdc20	Cell division cycle protein 20 homolog	7.80983e-25	1.12735e-21	2.51196
GO:0007049	Cell cycle	Cdkn2d	Cdkn2d	Putative uncharacterized protein	7.80983e-25	1.12735e-21	2.51196
GO:0007049	Cell cycle	Kif2c	Kif2c	Kinesin-like protein KIF2C	7.80983e-25	1.12735e-21	2.51196
GO:0007049	Cell cycle	Fancd2	Fancd2	MCG132961	7.80983e-25	1.12735e-21	2.51196
GO:0007049	Cell cycle	Cdca5	Cdca5	Sororin	7.80983e-25	1.12735e-21	2.51196
GO:0007049	Cell cycle	Txnl4b	Txnl4b	Thioredoxin-like protein 4B	7.80983e-25	1.12735e-21	2.51196
GO:0007049	Cell cycle	Kif23	Kif23	Kinesin-like protein KIF23	7.80983e-25	1.12735e-21	2.51196
GO:0007049	Cell cycle	Pard6a	Pard6a	Partitioning defective 6 homolog alpha	7.80983e-25	1.12735e-21	2.51196
GO:0007049	Cell cycle	Aurka	Aurka	Aurora kinase A, isoform CRA_b	7.80983e-25	1.12735e-21	2.51196
GO:0007049	Cell cycle	Ccne2	Ccne2	Cyclin E2, isoform CRA_a	7.80983e-25	1.12735e-21	2.51196
GO:0007049	Cell cycle	Ccnk	Ccnk	Cyclin-K	7.80983e-25	1.12735e-21	2.51196
GO:0007049	Cell cycle	Pkmyt1	Pkmyt1	Membrane-associated tyrosine- and threonine-specific cdc2-inhibitory kinase	7.80983e-25	1.12735e-21	2.51196
GO:0007049	Cell cycle	Haus1	Haus1	HAUS augmin-like complex subunit 1	7.80983e-25	1.12735e-21	2.51196
GO:0007049	Cell cycle	Sept5	Sept5	Sept5 protein	7.80983e-25	1.12735e-21	2.51196
GO:0007049	Cell cycle	Cdca8	Cdca8	Borealin	7.80983e-25	1.12735e-21	2.51196
GO:0007049	Cell cycle	Bub1b	Bub1b	Putative uncharacterized protein	7.80983e-25	1.12735e-21	2.51196
GO:0007049	Cell cycle	Dmc1	Dmc1	Disrupted meiotic cDNA 1 homolog, isoform CRA_a	7.80983e-25	1.12735e-21	2.51196
GO:0007049	Cell cycle	Cep63	Cep63	Centrosomal protein of 63 kDa	7.80983e-25	1.12735e-21	2.51196
GO:0007049	Cell cycle	Stk10	Stk10	Serine/threonine kinase 10	7.80983e-25	1.12735e-21	2.51196
GO:0007049	Cell cycle	Gmnn	Gmnn	Geminin, isoform CRA_a	7.80983e-25	1.12735e-21	2.51196
GO:0007049	Cell cycle	Hepacam	Hepacam	Hepatocyte cell adhesion molecule	7.80983e-25	1.12735e-21	2.51196
GO:0007049	Cell cycle	Cdca2	Cdca2	Cell division cycle-associated protein 2	7.80983e-25	1.12735e-21	2.51196
GO:0007049	Cell cycle	Haspin	Gsg2	Germ cell-specific gene 2	7.80983e-25	1.12735e-21	2.51196
GO:0007049	Cell cycle	Chaf1a	Chaf1a	Putative uncharacterized protein	7.80983e-25	1.12735e-21	2.51196
GO:0007049	Cell cycle	Spdya	Spdya	Spdya protein	7.80983e-25	1.12735e-21	2.51196
GO:0007049	Cell cycle	Thap1	Thap1	THAP domain-containing protein 1	7.80983e-25	1.12735e-21	2.51196
GO:0007049	Cell cycle	Nek11	Nek11	Serine/threonine-protein kinase Nek11	7.80983e-25	1.12735e-21	2.51196
GO:0007049	Cell cycle	H2afx	H2afx	Histone H2AX	7.80983e-25	1.12735e-21	2.51196
GO:0007049	Cell cycle	Cdca3	Cdca3	Cell division cycle-associated protein 3	7.80983e-25	1.12735e-21	2.51196
GO:0007049	Cell cycle	Itgb3bp	Itgb3bp	Integrin beta 3 binding protein	7.80983e-25	1.12735e-21	2.51196
GO:0007049	Cell cycle	Spc24	Spc24	SPC24, NDC80 kinetochore complex component, homolog (S. cerevisiae)	7.80983e-25	1.12735e-21	2.51196
GO:0007049	Cell cycle	E2f8	E2f8	Transcription factor E2F8	7.80983e-25	1.12735e-21	2.51196
GO:0007049	Cell cycle	Usp44	Usp44	Ubiquitin carboxyl-terminal hydrolase 44	7.80983e-25	1.12735e-21	2.51196
GO:0007049	Cell cycle	Ddx11	Ddx11	Probable ATP-dependent RNA helicase DDX11	7.80983e-25	1.12735e-21	2.51196
GO:0007049	Cell cycle	Usp2	Usp2	Ubiquitin carboxyl-terminal hydrolase 2	7.80983e-25	1.12735e-21	2.51196
GO:0007049	Cell cycle	Cdk1	Cdk1	Cyclin-dependent kinase 1	7.80983e-25	1.12735e-21	2.51196
GO:0007049	Cell cycle	Brinp1	Brinp1	BMP/retinoic acid-inducible neural-specific protein 1	7.80983e-25	1.12735e-21	2.51196
GO:0007049	Cell cycle	Map10	Map10	Microtubule-associated protein 10	7.80983e-25	1.12735e-21	2.51196
GO:0007049	Cell cycle	Chtf18	Chtf18	Chromosome transmission fidelity protein 18 homolog	7.80983e-25	1.12735e-21	2.51196
GO:0007049	Cell cycle	Dsn1	Dsn1	Kinetochore-associated protein DSN1 homolog	7.80983e-25	1.12735e-21	2.51196
GO:0007049	Cell cycle	Kif18b	Kif18b	Kinesin-like protein KIF18B	7.80983e-25	1.12735e-21	2.51196
GO:0007049	Cell cycle	Vps4a	Vps4a	Putative uncharacterized protein	7.80983e-25	1.12735e-21	2.51196
GO:0007049	Cell cycle	Brsk2	Brsk2	BR serine/threonine kinase 2 transcript variant 5	7.80983e-25	1.12735e-21	2.51196
GO:0007049	Cell cycle	Nusap1	Nusap1	Nucleolar and spindle-associated protein 1	7.80983e-25	1.12735e-21	2.51196
GO:0007049	Cell cycle	Fanci	Fanci	Fanconi anemia group I protein homolog	7.80983e-25	1.12735e-21	2.51196
GO:0007049	Cell cycle	Tmprss11a	Tmprss11a	Transmembrane protease serine 11A	7.80983e-25	1.12735e-21	2.51196
GO:0007049	Cell cycle	Cep55	Cep55	Centrosomal protein of 55 kDa	7.80983e-25	1.12735e-21	2.51196
GO:0007049	Cell cycle	Arhgef2	Arhgef2	Rho guanine nucleotide exchange factor 2	7.80983e-25	1.12735e-21	2.51196
GO:0007049	Cell cycle	Ska1	Ska1	Spindle and kinetochore-associated protein 1	7.80983e-25	1.12735e-21	2.51196
GO:0007049	Cell cycle	Mlf1	Mlf1	Myeloid leukemia factor 1, isoform CRA_c	7.80983e-25	1.12735e-21	2.51196
GO:0007049	Cell cycle	Ticrr	Ticrr	Putative uncharacterized protein	7.80983e-25	1.12735e-21	2.51196
GO:0007049	Cell cycle	Suv39h2	Suv39h2	Histone-lysine N-methyltransferase SUV39H2	7.80983e-25	1.12735e-21	2.51196
GO:0007049	Cell cycle	Cks2	Cks2	Cyclin-dependent kinases regulatory subunit 2	7.80983e-25	1.12735e-21	2.51196
GO:0007049	Cell cycle	Spc25	Spc25	Kinetochore protein Spc25	7.80983e-25	1.12735e-21	2.51196
GO:0007049	Cell cycle	Kif2a	Kif2a	Kinesin-like protein KIF2A	7.80983e-25	1.12735e-21	2.51196
GO:0007049	Cell cycle	Smpd3	Smpd3	Sphingomyelin phosphodiesterase 3	7.80983e-25	1.12735e-21	2.51196
GO:0007049	Cell cycle	Mapk6	Mapk6	Mitogen-activated protein kinase 6	7.80983e-25	1.12735e-21	2.51196
GO:0007049	Cell cycle	Brsk1	Brsk1	Serine/threonine-protein kinase BRSK1	7.80983e-25	1.12735e-21	2.51196
GO:0007049	Cell cycle	Ska3	Ska3	Spindle and kinetochore-associated protein 3	7.80983e-25	1.12735e-21	2.51196
GO:0007049	Cell cycle	Ran	Ran	GTP-binding nuclear protein Ran	7.80983e-25	1.12735e-21	2.51196
GO:0007049	Cell cycle	Mastl	Mastl	Serine/threonine-protein kinase greatwall	7.80983e-25	1.12735e-21	2.51196
GO:0007049	Cell cycle	Anln	Anln	Anln protein	7.80983e-25	1.12735e-21	2.51196
GO:0007049	Cell cycle	Nasp	Nasp	Nuclear autoantigenic sperm protein (Histone-binding), isoform CRA_c	7.80983e-25	1.12735e-21	2.51196
GO:0007049	Cell cycle	Cenpe	Cenpe	Kinesin-like protein	7.80983e-25	1.12735e-21	2.51196
GO:0007049	Cell cycle	Sass6	Sass6	Putative uncharacterized protein	7.80983e-25	1.12735e-21	2.51196
GO:0007049	Cell cycle	Stag3	Stag3	Cohesin subunit SA-3	7.80983e-25	1.12735e-21	2.51196
GO:0007049	Cell cycle	Rb1cc1	Rb1cc1	RB1-inducible coiled-coil 1	7.80983e-25	1.12735e-21	2.51196
GO:0007049	Cell cycle	Cdc25c	Cdc25c	M-phase inducer phosphatase 3	7.80983e-25	1.12735e-21	2.51196
GO:0007286	Spermatid development	Trip13	Trip13	Pachytene checkpoint protein 2 homolog	4.91333e-22	4.72826e-19	5.90289
GO:0007286	Spermatid development	Tssk2	Tssk2	Testis-specific serine/threonine-protein kinase 2	4.91333e-22	4.72826e-19	5.90289
GO:0007286	Spermatid development	Nup210l	Nup210l	Nuclear pore membrane glycoprotein 210-like	4.91333e-22	4.72826e-19	5.90289
GO:0007286	Spermatid development	Tarbp2	Tarbp2	RISC-loading complex subunit TARBP2	4.91333e-22	4.72826e-19	5.90289
GO:0007286	Spermatid development	Ddx25	Ddx25	ATP-dependent RNA helicase DDX25	4.91333e-22	4.72826e-19	5.90289
GO:0007286	Spermatid development	Sept4	Sept4	Septin-4	4.91333e-22	4.72826e-19	5.90289
GO:0007286	Spermatid development	Cep57	Cep57	Cep57 protein	4.91333e-22	4.72826e-19	5.90289
GO:0007286	Spermatid development	Ddias	Ddias	DNA damage-induced apoptosis suppressor protein	4.91333e-22	4.72826e-19	5.90289
GO:0007286	Spermatid development	Acrbp	Acrbp	Acrosin-binding protein	4.91333e-22	4.72826e-19	5.90289
GO:0007286	Spermatid development	Rnf17	Rnf17	RING finger protein 17	4.91333e-22	4.72826e-19	5.90289
GO:0007286	Spermatid development	Spo11	Spo11	Spo11 protein	4.91333e-22	4.72826e-19	5.90289
GO:0007286	Spermatid development	Capza3	Capza3	F-actin-capping protein subunit alpha-3	4.91333e-22	4.72826e-19	5.90289
GO:0007286	Spermatid development	Dhh	Dhh	Desert hedgehog protein	4.91333e-22	4.72826e-19	5.90289
GO:0007286	Spermatid development	Slxl1	Slxl1	Protein Slxl1	4.91333e-22	4.72826e-19	5.90289
GO:0007286	Spermatid development	Fscn3	Fscn3	Fascin-3	4.91333e-22	4.72826e-19	5.90289
GO:0007286	Spermatid development	Osbp2	Osbp2	Oxysterol-binding protein 2	4.91333e-22	4.72826e-19	5.90289
GO:0007286	Spermatid development	Fancg	Fancg	Fancg protein	4.91333e-22	4.72826e-19	5.90289
GO:0007286	Spermatid development	Alms1	Alms1	Alstrom syndrome protein 1 homolog	4.91333e-22	4.72826e-19	5.90289
GO:0007286	Spermatid development	Zmynd15	Zmynd15	Zinc finger, MYND-type containing 15	4.91333e-22	4.72826e-19	5.90289
GO:0007286	Spermatid development	Dpy19l2	Dpy19l2	Probable C-mannosyltransferase DPY19L2	4.91333e-22	4.72826e-19	5.90289
GO:0007286	Spermatid development	Rimbp3	Rimbp3	RIMS-binding protein 3	4.91333e-22	4.72826e-19	5.90289
GO:0007286	Spermatid development	Klhl10	Klhl10	Kelch-like 10 (Drosophila)	4.91333e-22	4.72826e-19	5.90289
GO:0007286	Spermatid development	Dmc1	Dmc1	Disrupted meiotic cDNA 1 homolog, isoform CRA_a	4.91333e-22	4.72826e-19	5.90289
GO:0007286	Spermatid development	Pld6	Pld6	Mitochondrial cardiolipin hydrolase	4.91333e-22	4.72826e-19	5.90289
GO:0007286	Spermatid development	Tssk1	Tssk1	Testis-specific serine/threonine-protein kinase 1	4.91333e-22	4.72826e-19	5.90289
GO:0007286	Spermatid development	Nme5	Nme5	Nucleoside diphosphate kinase homolog 5	4.91333e-22	4.72826e-19	5.90289
GO:0007286	Spermatid development	Hook1	Hook1	Protein Hook homolog 1	4.91333e-22	4.72826e-19	5.90289
GO:0007286	Spermatid development	Ccnb1ip1	Ccnb1ip1	E3 ubiquitin-protein ligase CCNB1IP1	4.91333e-22	4.72826e-19	5.90289
GO:0007286	Spermatid development	Hspa2	Hspa2	Heat shock protein 70-2	4.91333e-22	4.72826e-19	5.90289
GO:0007286	Spermatid development	Tnp1	Tnp1	Spermatid nuclear transition protein 1	4.91333e-22	4.72826e-19	5.90289
GO:0007286	Spermatid development	Prm1	Prm1	Sperm protamine P1	4.91333e-22	4.72826e-19	5.90289
GO:0007286	Spermatid development	Insl6	Insl6	Insulin-like 6	4.91333e-22	4.72826e-19	5.90289
GO:0007286	Spermatid development	Pacrg	Pacrg	PARK2 co-regulated	4.91333e-22	4.72826e-19	5.90289
GO:0007286	Spermatid development	Tdrd5	Tdrd5	Tudor domain-containing protein 5	4.91333e-22	4.72826e-19	5.90289
GO:0007286	Spermatid development	Prm2	Prm2	Protamine-2	4.91333e-22	4.72826e-19	5.90289
GO:0007286	Spermatid development	Odf2	Odf2	Outer dense fiber protein 2	4.91333e-22	4.72826e-19	5.90289
GO:0007286	Spermatid development	Ran	Ran	GTP-binding nuclear protein Ran	4.91333e-22	4.72826e-19	5.90289
GO:0007286	Spermatid development	Ybx2	Ybx2	Y-box-binding protein 2	4.91333e-22	4.72826e-19	5.90289
GO:0007286	Spermatid development	Galntl5	Galntl5	Inactive polypeptide N-acetylgalactosaminyltransferase-like protein 5	4.91333e-22	4.72826e-19	5.90289
GO:0007067	Mitotic nuclear division	Kif2b	Kif2b	Kinesin-like protein KIF2B	1.98726e-20	1.4343e-17	3.18077
GO:0007067	Mitotic nuclear division	Aurkb	Aurkb	Aurora kinase B	1.98726e-20	1.4343e-17	3.18077
GO:0007067	Mitotic nuclear division	Cenph	Cenph	Centromere protein H	1.98726e-20	1.4343e-17	3.18077
GO:0007067	Mitotic nuclear division	Ncapd2	Ncapd2	Condensin complex subunit 1	1.98726e-20	1.4343e-17	3.18077
GO:0007067	Mitotic nuclear division	Knstrn	Knstrn	DNA segment, Chr 2, ERATO Doi 750, expressed, isoform CRA_c	1.98726e-20	1.4343e-17	3.18077
GO:0007067	Mitotic nuclear division	Tex14	Tex14	Inactive serine/threonine-protein kinase TEX14	1.98726e-20	1.4343e-17	3.18077
GO:0007067	Mitotic nuclear division	Smc4	Smc4	Structural maintenance of chromosomes protein 4	1.98726e-20	1.4343e-17	3.18077
GO:0007067	Mitotic nuclear division	Ndc80	Ndc80	Kinetochore protein NDC80 homolog	1.98726e-20	1.4343e-17	3.18077
GO:0007067	Mitotic nuclear division	Ube2c	Ube2c	Ubiquitin-conjugating enzyme E2C	1.98726e-20	1.4343e-17	3.18077
GO:0007067	Mitotic nuclear division	Katnb1	Katnb1	Katanin p80 WD40 repeat-containing subunit B1	1.98726e-20	1.4343e-17	3.18077
GO:0007067	Mitotic nuclear division	Rcc1	Rcc1	Regulator of chromosome condensation	1.98726e-20	1.4343e-17	3.18077
GO:0007067	Mitotic nuclear division	Kif20b	Kif20b	Kinesin-like protein KIF20B	1.98726e-20	1.4343e-17	3.18077
GO:0007067	Mitotic nuclear division	Ccnf	Ccnf	Cyclin-F	1.98726e-20	1.4343e-17	3.18077
GO:0007067	Mitotic nuclear division	Lrrcc1	Lrrcc1	Leucine-rich repeat and coiled-coil domain-containing protein 1	1.98726e-20	1.4343e-17	3.18077
GO:0007067	Mitotic nuclear division	Bub1	Bub1	Mitotic checkpoint serine/threonine-protein kinase BUB1	1.98726e-20	1.4343e-17	3.18077
GO:0007067	Mitotic nuclear division	Plk1	Plk1	Polo like kinase	1.98726e-20	1.4343e-17	3.18077
GO:0007067	Mitotic nuclear division	Spdl1	Spdl1	Protein Spindly	1.98726e-20	1.4343e-17	3.18077
GO:0007067	Mitotic nuclear division	Mis18bp1	Mis18bp1	Putative uncharacterized protein	1.98726e-20	1.4343e-17	3.18077
GO:0007067	Mitotic nuclear division	Spag5	Spag5	S17 protein	1.98726e-20	1.4343e-17	3.18077
GO:0007067	Mitotic nuclear division	Mad2l2	Mad2l2	Mitotic spindle assembly checkpoint protein MAD2B	1.98726e-20	1.4343e-17	3.18077
GO:0007067	Mitotic nuclear division	Nek2	Nek2	Serine/threonine-protein kinase Nek2	1.98726e-20	1.4343e-17	3.18077
GO:0007067	Mitotic nuclear division	Zwilch	Zwilch	Protein zwilch homolog	1.98726e-20	1.4343e-17	3.18077
GO:0007067	Mitotic nuclear division	Dynlt1b	Dynlt1b	Dynein light chain Tctex-type 1	1.98726e-20	1.4343e-17	3.18077
GO:0007067	Mitotic nuclear division	Cenpv	Cenpv	Centromere protein V	1.98726e-20	1.4343e-17	3.18077
GO:0007067	Mitotic nuclear division	Aspm	Aspm	Abnormal spindle-like microcephaly associated splice variant 1	1.98726e-20	1.4343e-17	3.18077
GO:0007067	Mitotic nuclear division	Nsl1	Nsl1	Kinetochore-associated protein NSL1 homolog	1.98726e-20	1.4343e-17	3.18077
GO:0007067	Mitotic nuclear division	Oip5	Oip5	Protein Mis18-beta	1.98726e-20	1.4343e-17	3.18077
GO:0007067	Mitotic nuclear division	Ccnb2	Ccnb2	G2/mitotic-specific cyclin-B2	1.98726e-20	1.4343e-17	3.18077
GO:0007067	Mitotic nuclear division	Hells	Hells	Lymphocyte-specific helicase	1.98726e-20	1.4343e-17	3.18077
GO:0007067	Mitotic nuclear division	Kntc1	Kntc1	Kinetochore-associated protein 1	1.98726e-20	1.4343e-17	3.18077
GO:0007067	Mitotic nuclear division	Ncaph	Ncaph	Condensin complex subunit 2	1.98726e-20	1.4343e-17	3.18077
GO:0007067	Mitotic nuclear division	Kif11	Kif11	Kinesin-like protein KIF11	1.98726e-20	1.4343e-17	3.18077
GO:0007067	Mitotic nuclear division	Cenpw	Cenpw	MCG20021	1.98726e-20	1.4343e-17	3.18077
GO:0007067	Mitotic nuclear division	Nup37	Nup37	Nucleoporin Nup37	1.98726e-20	1.4343e-17	3.18077
GO:0007067	Mitotic nuclear division	Tpx2	Tpx2	Targeting protein for Xklp2	1.98726e-20	1.4343e-17	3.18077
GO:0007067	Mitotic nuclear division	Ccna1	Ccna1	Cyclin-A1	1.98726e-20	1.4343e-17	3.18077
GO:0007067	Mitotic nuclear division	Cit	Cit	Citron Rho-interacting kinase	1.98726e-20	1.4343e-17	3.18077
GO:0007067	Mitotic nuclear division	Cenpn	Cenpn	Centromere protein N	1.98726e-20	1.4343e-17	3.18077
GO:0007067	Mitotic nuclear division	Nuf2	Nuf2	Kinetochore protein Nuf2	1.98726e-20	1.4343e-17	3.18077
GO:0007067	Mitotic nuclear division	Birc5	Birc5	Baculoviral IAP repeat-containing protein 5	1.98726e-20	1.4343e-17	3.18077
GO:0007067	Mitotic nuclear division	Ccnb1	Ccnb1	Cyclin b1 variant 1	1.98726e-20	1.4343e-17	3.18077
GO:0007067	Mitotic nuclear division	Cdc20	Cdc20	Cell division cycle protein 20 homolog	1.98726e-20	1.4343e-17	3.18077
GO:0007067	Mitotic nuclear division	Kif2c	Kif2c	Kinesin-like protein KIF2C	1.98726e-20	1.4343e-17	3.18077
GO:0007067	Mitotic nuclear division	Cdca5	Cdca5	Sororin	1.98726e-20	1.4343e-17	3.18077
GO:0007067	Mitotic nuclear division	Txnl4b	Txnl4b	Thioredoxin-like protein 4B	1.98726e-20	1.4343e-17	3.18077
GO:0007067	Mitotic nuclear division	Kif23	Kif23	Kinesin-like protein KIF23	1.98726e-20	1.4343e-17	3.18077
GO:0007067	Mitotic nuclear division	Aurka	Aurka	Aurora kinase A, isoform CRA_b	1.98726e-20	1.4343e-17	3.18077
GO:0007067	Mitotic nuclear division	Ccnk	Ccnk	Cyclin-K	1.98726e-20	1.4343e-17	3.18077
GO:0007067	Mitotic nuclear division	Haus1	Haus1	HAUS augmin-like complex subunit 1	1.98726e-20	1.4343e-17	3.18077
GO:0007067	Mitotic nuclear division	Cdca8	Cdca8	Borealin	1.98726e-20	1.4343e-17	3.18077
GO:0007067	Mitotic nuclear division	Bub1b	Bub1b	Putative uncharacterized protein	1.98726e-20	1.4343e-17	3.18077
GO:0007067	Mitotic nuclear division	Cep63	Cep63	Centrosomal protein of 63 kDa	1.98726e-20	1.4343e-17	3.18077
GO:0007067	Mitotic nuclear division	Fbxw5	Fbxw5	F-box/WD repeat-containing protein 5	1.98726e-20	1.4343e-17	3.18077
GO:0007067	Mitotic nuclear division	Cdca2	Cdca2	Cell division cycle-associated protein 2	1.98726e-20	1.4343e-17	3.18077
GO:0007067	Mitotic nuclear division	Dynlt1f	Dynlt1f	Predicted gene, 547127	1.98726e-20	1.4343e-17	3.18077
GO:0007067	Mitotic nuclear division	Cdca3	Cdca3	Cell division cycle-associated protein 3	1.98726e-20	1.4343e-17	3.18077
GO:0007067	Mitotic nuclear division	Itgb3bp	Itgb3bp	Integrin beta 3 binding protein	1.98726e-20	1.4343e-17	3.18077
GO:0007067	Mitotic nuclear division	Spc24	Spc24	SPC24, NDC80 kinetochore complex component, homolog (S. cerevisiae)	1.98726e-20	1.4343e-17	3.18077
GO:0007067	Mitotic nuclear division	Usp44	Usp44	Ubiquitin carboxyl-terminal hydrolase 44	1.98726e-20	1.4343e-17	3.18077
GO:0007067	Mitotic nuclear division	Cdk1	Cdk1	Cyclin-dependent kinase 1	1.98726e-20	1.4343e-17	3.18077
GO:0007067	Mitotic nuclear division	Dsn1	Dsn1	Kinetochore-associated protein DSN1 homolog	1.98726e-20	1.4343e-17	3.18077
GO:0007067	Mitotic nuclear division	Espl1	Espl1	Espl1 protein	1.98726e-20	1.4343e-17	3.18077
GO:0007067	Mitotic nuclear division	Kif18b	Kif18b	Kinesin-like protein KIF18B	1.98726e-20	1.4343e-17	3.18077
GO:0007067	Mitotic nuclear division	Brsk2	Brsk2	BR serine/threonine kinase 2 transcript variant 5	1.98726e-20	1.4343e-17	3.18077
GO:0007067	Mitotic nuclear division	Nusap1	Nusap1	Nucleolar and spindle-associated protein 1	1.98726e-20	1.4343e-17	3.18077
GO:0007067	Mitotic nuclear division	Cep55	Cep55	Centrosomal protein of 55 kDa	1.98726e-20	1.4343e-17	3.18077
GO:0007067	Mitotic nuclear division	Arhgef2	Arhgef2	Rho guanine nucleotide exchange factor 2	1.98726e-20	1.4343e-17	3.18077
GO:0007067	Mitotic nuclear division	Ska1	Ska1	Spindle and kinetochore-associated protein 1	1.98726e-20	1.4343e-17	3.18077
GO:0007067	Mitotic nuclear division	Spc25	Spc25	Kinetochore protein Spc25	1.98726e-20	1.4343e-17	3.18077
GO:0007067	Mitotic nuclear division	Kif2a	Kif2a	Kinesin-like protein KIF2A	1.98726e-20	1.4343e-17	3.18077
GO:0007067	Mitotic nuclear division	Ska3	Ska3	Spindle and kinetochore-associated protein 3	1.98726e-20	1.4343e-17	3.18077
GO:0007067	Mitotic nuclear division	Ran	Ran	GTP-binding nuclear protein Ran	1.98726e-20	1.4343e-17	3.18077
GO:0007067	Mitotic nuclear division	Mastl	Mastl	Serine/threonine-protein kinase greatwall	1.98726e-20	1.4343e-17	3.18077
GO:0007067	Mitotic nuclear division	Anln	Anln	Anln protein	1.98726e-20	1.4343e-17	3.18077
GO:0007067	Mitotic nuclear division	Cenpe	Cenpe	Kinesin-like protein	1.98726e-20	1.4343e-17	3.18077
GO:0007067	Mitotic nuclear division	Cdc25c	Cdc25c	M-phase inducer phosphatase 3	1.98726e-20	1.4343e-17	3.18077
GO:0051301	Cell division	Kif2b	Kif2b	Kinesin-like protein KIF2B	4.91373e-19	2.83719e-16	2.74682
GO:0051301	Cell division	Aurkb	Aurkb	Aurora kinase B	4.91373e-19	2.83719e-16	2.74682
GO:0051301	Cell division	Ncapd2	Ncapd2	Condensin complex subunit 1	4.91373e-19	2.83719e-16	2.74682
GO:0051301	Cell division	Racgap1	Racgap1	Rac GTPase-activating protein 1	4.91373e-19	2.83719e-16	2.74682
GO:0051301	Cell division	Knstrn	Knstrn	DNA segment, Chr 2, ERATO Doi 750, expressed, isoform CRA_c	4.91373e-19	2.83719e-16	2.74682
GO:0051301	Cell division	Tex14	Tex14	Inactive serine/threonine-protein kinase TEX14	4.91373e-19	2.83719e-16	2.74682
GO:0051301	Cell division	Smc4	Smc4	Structural maintenance of chromosomes protein 4	4.91373e-19	2.83719e-16	2.74682
GO:0051301	Cell division	Ndc80	Ndc80	Kinetochore protein NDC80 homolog	4.91373e-19	2.83719e-16	2.74682
GO:0051301	Cell division	Ube2c	Ube2c	Ubiquitin-conjugating enzyme E2C	4.91373e-19	2.83719e-16	2.74682
GO:0051301	Cell division	Katnb1	Katnb1	Katanin p80 WD40 repeat-containing subunit B1	4.91373e-19	2.83719e-16	2.74682
GO:0051301	Cell division	Cdk20	Cdk20	Cyclin-dependent kinase 20	4.91373e-19	2.83719e-16	2.74682
GO:0051301	Cell division	Rcc1	Rcc1	Regulator of chromosome condensation	4.91373e-19	2.83719e-16	2.74682
GO:0051301	Cell division	Kif20b	Kif20b	Kinesin-like protein KIF20B	4.91373e-19	2.83719e-16	2.74682
GO:0051301	Cell division	Sept4	Sept4	Septin-4	4.91373e-19	2.83719e-16	2.74682
GO:0051301	Cell division	Ccnf	Ccnf	Cyclin-F	4.91373e-19	2.83719e-16	2.74682
GO:0051301	Cell division	Cdc14a	Cdc14a	Dual specificity protein phosphatase CDC14A	4.91373e-19	2.83719e-16	2.74682
GO:0051301	Cell division	Syce2	Syce2	Synaptonemal complex central element protein 2	4.91373e-19	2.83719e-16	2.74682
GO:0051301	Cell division	Lrrcc1	Lrrcc1	Leucine-rich repeat and coiled-coil domain-containing protein 1	4.91373e-19	2.83719e-16	2.74682
GO:0051301	Cell division	Bub1	Bub1	Mitotic checkpoint serine/threonine-protein kinase BUB1	4.91373e-19	2.83719e-16	2.74682
GO:0051301	Cell division	Plk1	Plk1	Polo like kinase	4.91373e-19	2.83719e-16	2.74682
GO:0051301	Cell division	Spdl1	Spdl1	Protein Spindly	4.91373e-19	2.83719e-16	2.74682
GO:0051301	Cell division	Mis18bp1	Mis18bp1	Putative uncharacterized protein	4.91373e-19	2.83719e-16	2.74682
GO:0051301	Cell division	Spag5	Spag5	S17 protein	4.91373e-19	2.83719e-16	2.74682
GO:0051301	Cell division	Mad2l2	Mad2l2	Mitotic spindle assembly checkpoint protein MAD2B	4.91373e-19	2.83719e-16	2.74682
GO:0051301	Cell division	Nek2	Nek2	Serine/threonine-protein kinase Nek2	4.91373e-19	2.83719e-16	2.74682
GO:0051301	Cell division	Zwilch	Zwilch	Protein zwilch homolog	4.91373e-19	2.83719e-16	2.74682
GO:0051301	Cell division	Dynlt1b	Dynlt1b	Dynein light chain Tctex-type 1	4.91373e-19	2.83719e-16	2.74682
GO:0051301	Cell division	Cenpv	Cenpv	Centromere protein V	4.91373e-19	2.83719e-16	2.74682
GO:0051301	Cell division	Aspm	Aspm	Abnormal spindle-like microcephaly associated splice variant 1	4.91373e-19	2.83719e-16	2.74682
GO:0051301	Cell division	Nsl1	Nsl1	Kinetochore-associated protein NSL1 homolog	4.91373e-19	2.83719e-16	2.74682
GO:0051301	Cell division	Oip5	Oip5	Protein Mis18-beta	4.91373e-19	2.83719e-16	2.74682
GO:0051301	Cell division	Ccnb2	Ccnb2	G2/mitotic-specific cyclin-B2	4.91373e-19	2.83719e-16	2.74682
GO:0051301	Cell division	Hells	Hells	Lymphocyte-specific helicase	4.91373e-19	2.83719e-16	2.74682
GO:0051301	Cell division	Kntc1	Kntc1	Kinetochore-associated protein 1	4.91373e-19	2.83719e-16	2.74682
GO:0051301	Cell division	Prc1	Prc1	Protein regulator of cytokinesis 1, isoform CRA_e	4.91373e-19	2.83719e-16	2.74682
GO:0051301	Cell division	Ncaph	Ncaph	Condensin complex subunit 2	4.91373e-19	2.83719e-16	2.74682
GO:0051301	Cell division	Cdc7	Cdc7	Cell division cycle 7 (S. cerevisiae), isoform CRA_a	4.91373e-19	2.83719e-16	2.74682
GO:0051301	Cell division	Kif11	Kif11	Kinesin-like protein KIF11	4.91373e-19	2.83719e-16	2.74682
GO:0051301	Cell division	Cenpw	Cenpw	MCG20021	4.91373e-19	2.83719e-16	2.74682
GO:0051301	Cell division	Nup37	Nup37	Nucleoporin Nup37	4.91373e-19	2.83719e-16	2.74682
GO:0051301	Cell division	Tpx2	Tpx2	Targeting protein for Xklp2	4.91373e-19	2.83719e-16	2.74682
GO:0051301	Cell division	Ccna1	Ccna1	Cyclin-A1	4.91373e-19	2.83719e-16	2.74682
GO:0051301	Cell division	Ect2	Ect2	Protein ECT2	4.91373e-19	2.83719e-16	2.74682
GO:0051301	Cell division	Sept10	Sept10	Septin-10	4.91373e-19	2.83719e-16	2.74682
GO:0051301	Cell division	Cit	Cit	Citron Rho-interacting kinase	4.91373e-19	2.83719e-16	2.74682
GO:0051301	Cell division	Cdc45	Cdc45	Cell division control protein 45 homolog	4.91373e-19	2.83719e-16	2.74682
GO:0051301	Cell division	Syce1	Syce1	Synaptonemal complex central element protein 1	4.91373e-19	2.83719e-16	2.74682
GO:0051301	Cell division	Nuf2	Nuf2	Kinetochore protein Nuf2	4.91373e-19	2.83719e-16	2.74682
GO:0051301	Cell division	Birc5	Birc5	Baculoviral IAP repeat-containing protein 5	4.91373e-19	2.83719e-16	2.74682
GO:0051301	Cell division	Ccnb1	Ccnb1	Cyclin b1 variant 1	4.91373e-19	2.83719e-16	2.74682
GO:0051301	Cell division	Cdc20	Cdc20	Cell division cycle protein 20 homolog	4.91373e-19	2.83719e-16	2.74682
GO:0051301	Cell division	Kif2c	Kif2c	Kinesin-like protein KIF2C	4.91373e-19	2.83719e-16	2.74682
GO:0051301	Cell division	Cdca5	Cdca5	Sororin	4.91373e-19	2.83719e-16	2.74682
GO:0051301	Cell division	Kif23	Kif23	Kinesin-like protein KIF23	4.91373e-19	2.83719e-16	2.74682
GO:0051301	Cell division	Pard6a	Pard6a	Partitioning defective 6 homolog alpha	4.91373e-19	2.83719e-16	2.74682
GO:0051301	Cell division	Aurka	Aurka	Aurora kinase A, isoform CRA_b	4.91373e-19	2.83719e-16	2.74682
GO:0051301	Cell division	Ccne2	Ccne2	Cyclin E2, isoform CRA_a	4.91373e-19	2.83719e-16	2.74682
GO:0051301	Cell division	Ccnk	Ccnk	Cyclin-K	4.91373e-19	2.83719e-16	2.74682
GO:0051301	Cell division	Haus1	Haus1	HAUS augmin-like complex subunit 1	4.91373e-19	2.83719e-16	2.74682
GO:0051301	Cell division	Sept5	Sept5	Sept5 protein	4.91373e-19	2.83719e-16	2.74682
GO:0051301	Cell division	Cdca8	Cdca8	Borealin	4.91373e-19	2.83719e-16	2.74682
GO:0051301	Cell division	Bub1b	Bub1b	Putative uncharacterized protein	4.91373e-19	2.83719e-16	2.74682
GO:0051301	Cell division	Cep63	Cep63	Centrosomal protein of 63 kDa	4.91373e-19	2.83719e-16	2.74682
GO:0051301	Cell division	Cdca2	Cdca2	Cell division cycle-associated protein 2	4.91373e-19	2.83719e-16	2.74682
GO:0051301	Cell division	Dynlt1f	Dynlt1f	Predicted gene, 547127	4.91373e-19	2.83719e-16	2.74682
GO:0051301	Cell division	Cdca3	Cdca3	Cell division cycle-associated protein 3	4.91373e-19	2.83719e-16	2.74682
GO:0051301	Cell division	Itgb3bp	Itgb3bp	Integrin beta 3 binding protein	4.91373e-19	2.83719e-16	2.74682
GO:0051301	Cell division	Spc24	Spc24	SPC24, NDC80 kinetochore complex component, homolog (S. cerevisiae)	4.91373e-19	2.83719e-16	2.74682
GO:0051301	Cell division	Kif14	Kif14	Kinesin-like protein	4.91373e-19	2.83719e-16	2.74682
GO:0051301	Cell division	Usp44	Usp44	Ubiquitin carboxyl-terminal hydrolase 44	4.91373e-19	2.83719e-16	2.74682
GO:0051301	Cell division	Cdk1	Cdk1	Cyclin-dependent kinase 1	4.91373e-19	2.83719e-16	2.74682
GO:0051301	Cell division	Map10	Map10	Microtubule-associated protein 10	4.91373e-19	2.83719e-16	2.74682
GO:0051301	Cell division	Dsn1	Dsn1	Kinetochore-associated protein DSN1 homolog	4.91373e-19	2.83719e-16	2.74682
GO:0051301	Cell division	Kif18b	Kif18b	Kinesin-like protein KIF18B	4.91373e-19	2.83719e-16	2.74682
GO:0051301	Cell division	Vps4a	Vps4a	Putative uncharacterized protein	4.91373e-19	2.83719e-16	2.74682
GO:0051301	Cell division	Brsk2	Brsk2	BR serine/threonine kinase 2 transcript variant 5	4.91373e-19	2.83719e-16	2.74682
GO:0051301	Cell division	Nusap1	Nusap1	Nucleolar and spindle-associated protein 1	4.91373e-19	2.83719e-16	2.74682
GO:0051301	Cell division	Cep55	Cep55	Centrosomal protein of 55 kDa	4.91373e-19	2.83719e-16	2.74682
GO:0051301	Cell division	Arhgef2	Arhgef2	Rho guanine nucleotide exchange factor 2	4.91373e-19	2.83719e-16	2.74682
GO:0051301	Cell division	Ska1	Ska1	Spindle and kinetochore-associated protein 1	4.91373e-19	2.83719e-16	2.74682
GO:0051301	Cell division	Cks2	Cks2	Cyclin-dependent kinases regulatory subunit 2	4.91373e-19	2.83719e-16	2.74682
GO:0051301	Cell division	Spc25	Spc25	Kinetochore protein Spc25	4.91373e-19	2.83719e-16	2.74682
GO:0051301	Cell division	Kif2a	Kif2a	Kinesin-like protein KIF2A	4.91373e-19	2.83719e-16	2.74682
GO:0051301	Cell division	Ska3	Ska3	Spindle and kinetochore-associated protein 3	4.91373e-19	2.83719e-16	2.74682
GO:0051301	Cell division	Ran	Ran	GTP-binding nuclear protein Ran	4.91373e-19	2.83719e-16	2.74682
GO:0051301	Cell division	Mastl	Mastl	Serine/threonine-protein kinase greatwall	4.91373e-19	2.83719e-16	2.74682
GO:0051301	Cell division	Anln	Anln	Anln protein	4.91373e-19	2.83719e-16	2.74682
GO:0051301	Cell division	Cenpe	Cenpe	Kinesin-like protein	4.91373e-19	2.83719e-16	2.74682
GO:0051301	Cell division	Cdc25c	Cdc25c	M-phase inducer phosphatase 3	4.91373e-19	2.83719e-16	2.74682

## Sheet: Ed
GOID	GOTerm	QueryID	Symbol	Description	P-Value	FDR	Enrichment
GO:0042493	Response to drug	Acacb	Acacb	Acetyl-CoA carboxylase 2	3.06758e-07	0.000482485	2.63042
GO:0042493	Response to drug	Aoc1	Aoc1	Amiloride-sensitive amine oxidase [copper-containing]	3.06758e-07	0.000482485	2.63042
GO:0042493	Response to drug	Lpl	Lpl	Lipoprotein lipase	3.06758e-07	0.000482485	2.63042
GO:0042493	Response to drug	Adcy1	Adcy1	Adenylate cyclase type 1	3.06758e-07	0.000482485	2.63042
GO:0042493	Response to drug	Nfatc2	Nfatc2	Nuclear factor of-activated T-cells, cytoplasmic 2	3.06758e-07	0.000482485	2.63042
GO:0042493	Response to drug	Slc34a1	Slc34a1	Sodium-dependent phosphate transport protein 2A	3.06758e-07	0.000482485	2.63042
GO:0042493	Response to drug	Car9	Car9	Truncated carbonic anhydrase 9	3.06758e-07	0.000482485	2.63042
GO:0042493	Response to drug	Apoc3	Apoc3	Apolipoprotein C-III	3.06758e-07	0.000482485	2.63042
GO:0042493	Response to drug	Pdgfb	Pdgfb	Platelet-derived growth factor subunit B	3.06758e-07	0.000482485	2.63042
GO:0042493	Response to drug	Fos	Fos	Proto-oncogene c-Fos	3.06758e-07	0.000482485	2.63042
GO:0042493	Response to drug	Sncg	Sncg	Gamma-synuclein	3.06758e-07	0.000482485	2.63042
GO:0042493	Response to drug	Kdr	Kdr	Vascular endothelial growth factor receptor 2	3.06758e-07	0.000482485	2.63042
GO:0042493	Response to drug	Vegfb	Vegfb	Vascular endothelial growth factor B	3.06758e-07	0.000482485	2.63042
GO:0042493	Response to drug	Slc6a4	Slc6a4	Sodium-dependent serotonin transporter	3.06758e-07	0.000482485	2.63042
GO:0042493	Response to drug	Cox8b	Cox8b	Cytochrome c oxidase subunit 8B, mitochondrial	3.06758e-07	0.000482485	2.63042
GO:0042493	Response to drug	Ren1	Ren1	Renin-1	3.06758e-07	0.000482485	2.63042
GO:0042493	Response to drug	Ret	Ret	Proto-oncogene tyrosine-protein kinase receptor Ret	3.06758e-07	0.000482485	2.63042
GO:0042493	Response to drug	Apoa1	Apoa1	Apolipoprotein A-I	3.06758e-07	0.000482485	2.63042
GO:0042493	Response to drug	Mmp7	Mmp7	Matrilysin	3.06758e-07	0.000482485	2.63042
GO:0042493	Response to drug	Aqp1	Aqp1	Aquaporin-1	3.06758e-07	0.000482485	2.63042
GO:0042493	Response to drug	Egr1	Egr1	Early growth response protein 1	3.06758e-07	0.000482485	2.63042
GO:0042493	Response to drug	Hp	Hp	Haptoglobin	3.06758e-07	0.000482485	2.63042
GO:0042493	Response to drug	Ppargc1a	Ppargc1a	Peroxisome proliferator-activated receptor gamma coactivator 1-alpha	3.06758e-07	0.000482485	2.63042
GO:0042493	Response to drug	Adipoq	Adipoq	Adiponectin	3.06758e-07	0.000482485	2.63042
GO:0042493	Response to drug	Cyp2e1	Cyp2e1	Cytochrome P450 2E1	3.06758e-07	0.000482485	2.63042
GO:0042493	Response to drug	Cyba	Cyba	Cytochrome b-245, alpha polypeptide, isoform CRA_a	3.06758e-07	0.000482485	2.63042
GO:0042493	Response to drug	Pparg	Pparg	Peroxisome proliferator activated receptor gamma 2	3.06758e-07	0.000482485	2.63042
GO:0042493	Response to drug	Gstt1	Gstt1	Glutathione S-transferase, theta 1, isoform CRA_a	3.06758e-07	0.000482485	2.63042
GO:0042493	Response to drug	Mdk	Mdk	Embryonic-specific truncated midkine C	3.06758e-07	0.000482485	2.63042
GO:0042493	Response to drug	Map2k6	Map2k6	Dual-specificity mitogen-activated protein kinase kinase 6	3.06758e-07	0.000482485	2.63042
GO:0042493	Response to drug	Jun	Jun	Transcription factor AP-1	3.06758e-07	0.000482485	2.63042
GO:0042493	Response to drug	Emx1	Emx1	Homeobox protein EMX1	3.06758e-07	0.000482485	2.63042
GO:0042493	Response to drug	Abat	Abat	4-aminobutyrate aminotransferase, mitochondrial	3.06758e-07	0.000482485	2.63042
GO:0042493	Response to drug	Rph3al	Rph3al	Rabphilin 3A-like (Without C2 domains)	3.06758e-07	0.000482485	2.63042
GO:0055085	Transmembrane transport	Slc10a5	Slc10a5	Sodium/bile acid cotransporter 5	3.35642e-07	0.000482485	2.33844
GO:0055085	Transmembrane transport	Panx1	Panx1	Pannexin-1	3.35642e-07	0.000482485	2.33844
GO:0055085	Transmembrane transport	Sfxn5	Sfxn5	Sideroflexin-5	3.35642e-07	0.000482485	2.33844
GO:0055085	Transmembrane transport	Slc34a1	Slc34a1	Sodium-dependent phosphate transport protein 2A	3.35642e-07	0.000482485	2.33844
GO:0055085	Transmembrane transport	Slc25a42	Slc25a42	Mitochondrial coenzyme A transporter SLC25A42	3.35642e-07	0.000482485	2.33844
GO:0055085	Transmembrane transport	Slc9a3	Slc9a3	Sodium/hydrogen exchanger	3.35642e-07	0.000482485	2.33844
GO:0055085	Transmembrane transport	Scn9a	Scn9a	Sodium channel Nav1.7	3.35642e-07	0.000482485	2.33844
GO:0055085	Transmembrane transport	Slc22a4	Slc22a4	Solute carrier family 22 member 4	3.35642e-07	0.000482485	2.33844
GO:0055085	Transmembrane transport	Slc6a19	Slc6a19	Sodium-dependent neutral amino acid transporter B(0)AT1	3.35642e-07	0.000482485	2.33844
GO:0055085	Transmembrane transport	Slc26a9	Slc26a9	Solute carrier family 26 member 9	3.35642e-07	0.000482485	2.33844
GO:0055085	Transmembrane transport	Slc16a11	Slc16a11	Monocarboxylate transporter 11	3.35642e-07	0.000482485	2.33844
GO:0055085	Transmembrane transport	Clcnka	Clcnka	Chloride channel protein ClC-Ka	3.35642e-07	0.000482485	2.33844
GO:0055085	Transmembrane transport	Spns2	Spns2	Protein spinster homolog 2	3.35642e-07	0.000482485	2.33844
GO:0055085	Transmembrane transport	Slc6a4	Slc6a4	Sodium-dependent serotonin transporter	3.35642e-07	0.000482485	2.33844
GO:0055085	Transmembrane transport	Kcnh6	Kcnh6	Protein Kcnh6	3.35642e-07	0.000482485	2.33844
GO:0055085	Transmembrane transport	Slc5a7	Slc5a7	Putative uncharacterized protein	3.35642e-07	0.000482485	2.33844
GO:0055085	Transmembrane transport	Slc16a13	Slc16a13	Monocarboxylate transporter 13	3.35642e-07	0.000482485	2.33844
GO:0055085	Transmembrane transport	Slc22a17	Slc22a17	Slc22a17 protein	3.35642e-07	0.000482485	2.33844
GO:0055085	Transmembrane transport	Slc6a13	Slc6a13	Sodium- and chloride-dependent GABA transporter 2	3.35642e-07	0.000482485	2.33844
GO:0055085	Transmembrane transport	Slc26a1	Slc26a1	Sulfate anion transporter 1	3.35642e-07	0.000482485	2.33844
GO:0055085	Transmembrane transport	Gja1	Gja1	Gap junction alpha-1 protein	3.35642e-07	0.000482485	2.33844
GO:0055085	Transmembrane transport	Slc6a20b	Slc6a20b	Sodium- and chloride-dependent transporter XTRP3B	3.35642e-07	0.000482485	2.33844
GO:0055085	Transmembrane transport	Svopl	Svopl	Putative transporter SVOPL	3.35642e-07	0.000482485	2.33844
GO:0055085	Transmembrane transport	Aqp1	Aqp1	Aquaporin-1	3.35642e-07	0.000482485	2.33844
GO:0055085	Transmembrane transport	Slc5a11	Slc5a11	Sodium/myo-inositol cotransporter 2	3.35642e-07	0.000482485	2.33844
GO:0055085	Transmembrane transport	Slc5a1	Slc5a1	Sodium glucose cotransporter	3.35642e-07	0.000482485	2.33844
GO:0055085	Transmembrane transport	Slc6a8	Slc6a8	Creatine transporter SLC6A8 variant D	3.35642e-07	0.000482485	2.33844
GO:0055085	Transmembrane transport	Abcd2	Abcd2	Putative uncharacterized protein	3.35642e-07	0.000482485	2.33844
GO:0055085	Transmembrane transport	Slc26a3	Slc26a3	Chloride anion exchanger	3.35642e-07	0.000482485	2.33844
GO:0055085	Transmembrane transport	Slc39a4	Slc39a4	Putative uncharacterized protein	3.35642e-07	0.000482485	2.33844
GO:0055085	Transmembrane transport	Slc16a14	Slc16a14	Monocarboxylate transporter 14	3.35642e-07	0.000482485	2.33844
GO:0055085	Transmembrane transport	Slc39a5	Slc39a5	Zinc transporter ZIP5	3.35642e-07	0.000482485	2.33844
GO:0055085	Transmembrane transport	Slc12a2	Slc12a2	Solute carrier family 12 member 2	3.35642e-07	0.000482485	2.33844
GO:0055085	Transmembrane transport	Slc6a5	Slc6a5	Sodium- and chloride-dependent glycine transporter 2	3.35642e-07	0.000482485	2.33844
GO:0055085	Transmembrane transport	Slc12a7	Slc12a7	Solute carrier family 12, member 7, isoform CRA_b	3.35642e-07	0.000482485	2.33844
GO:0055085	Transmembrane transport	Kcnc2	Kcnc2	Potassium voltage-gated channel subfamily C member 2	3.35642e-07	0.000482485	2.33844
GO:0055085	Transmembrane transport	Slc22a1	Slc22a1	Solute carrier family 22 member 1	3.35642e-07	0.000482485	2.33844
GO:0055085	Transmembrane transport	Aqp4	Aqp4	Aquaporin-4	3.35642e-07	0.000482485	2.33844
GO:0055085	Transmembrane transport	Slc19a1	Slc19a1	Folate transporter 1	3.35642e-07	0.000482485	2.33844
GO:0055085	Transmembrane transport	Slc6a17	Slc6a17	Transporter	3.35642e-07	0.000482485	2.33844
GO:0055085	Transmembrane transport	AC130711.1	Clcn7	Chloride channel protein	3.35642e-07	0.000482485	2.33844
GO:0055085	Transmembrane transport	Cnga3	Cnga3	Cyclic nucleotide-gated cation channel alpha-3	3.35642e-07	0.000482485	2.33844
GO:0070328	Triglyceride homeostasis	Lpl	Lpl	Lipoprotein lipase	7.68098e-07	0.000736094	9.6777
GO:0070328	Triglyceride homeostasis	Apoc3	Apoc3	Apolipoprotein C-III	7.68098e-07	0.000736094	9.6777
GO:0070328	Triglyceride homeostasis	Angptl8	Gm6484	EG624219 protein	7.68098e-07	0.000736094	9.6777
GO:0070328	Triglyceride homeostasis	Apoa1	Apoa1	Apolipoprotein A-I	7.68098e-07	0.000736094	9.6777
GO:0070328	Triglyceride homeostasis	Apoa4	Apoa4	Apolipoprotein A-IV	7.68098e-07	0.000736094	9.6777
GO:0070328	Triglyceride homeostasis	Pla2g12b	Pla2g12b	Group XIIB secretory phospholipase A2-like protein	7.68098e-07	0.000736094	9.6777
GO:0070328	Triglyceride homeostasis	Angptl3	Angptl3	Angiopoietin-like 3	7.68098e-07	0.000736094	9.6777
GO:0070328	Triglyceride homeostasis	Hnf4a	Hnf4a	Hepatocyte nuclear factor 4-alpha	7.68098e-07	0.000736094	9.6777
GO:0009749	Response to glucose	Nnat	Nnat	Neuronatin, isoform CRA_a	1.75914e-06	0.00113797	4.59989
GO:0009749	Response to glucose	Sftpc	Sftpc	Pulmonary surfactant-associated protein C	1.75914e-06	0.00113797	4.59989
GO:0009749	Response to glucose	Khk	Khk	Ketohexokinase	1.75914e-06	0.00113797	4.59989
GO:0009749	Response to glucose	Glp1r	Glp1r	Glp1r protein	1.75914e-06	0.00113797	4.59989
GO:0009749	Response to glucose	Gja1	Gja1	Gap junction alpha-1 protein	1.75914e-06	0.00113797	4.59989
GO:0009749	Response to glucose	Pklr	Pklr	Pyruvate kinase PKLR	1.75914e-06	0.00113797	4.59989
GO:0009749	Response to glucose	Egr1	Egr1	Early growth response protein 1	1.75914e-06	0.00113797	4.59989
GO:0009749	Response to glucose	Nr1h4	Nr1h4	Bile acid receptor	1.75914e-06	0.00113797	4.59989
GO:0009749	Response to glucose	Adipoq	Adipoq	Adiponectin	1.75914e-06	0.00113797	4.59989
GO:0009749	Response to glucose	Acvr1c	Acvr1c	Receptor protein serine/threonine kinase	1.75914e-06	0.00113797	4.59989
GO:0009749	Response to glucose	Ildr2	Ildr2	Immunoglobulin-like domain-containing receptor 2	1.75914e-06	0.00113797	4.59989
GO:0009749	Response to glucose	Hnf1a	Hnf1a	Hepatocyte nuclear factor 1-alpha	1.75914e-06	0.00113797	4.59989
GO:0009749	Response to glucose	Gys2	Gys2	Glycogen [starch] synthase, liver	1.75914e-06	0.00113797	4.59989
GO:0009749	Response to glucose	Hnf4a	Hnf4a	Hepatocyte nuclear factor 4-alpha	1.75914e-06	0.00113797	4.59989
GO:0030104	Water homeostasis	Igf1	Igf1	Insulin-like growth factor I	1.97907e-06	0.00113797	26.6137
GO:0030104	Water homeostasis	Ghrhr	Ghrhr	Growth hormone-releasing hormone receptor	1.97907e-06	0.00113797	26.6137
GO:0030104	Water homeostasis	Aqp1	Aqp1	Aquaporin-1	1.97907e-06	0.00113797	26.6137
GO:0030104	Water homeostasis	Aqp4	Aqp4	Aquaporin-4	1.97907e-06	0.00113797	26.6137

## Sheet: Is
GOID	GOTerm	QueryID	Symbol	Description	P-Value	FDR	Enrichment
GO:0007169	Transmembrane receptor protein tyrosine kinase signaling pathway	Epha4	Epha4	Ephrin type-A receptor 4	6.84896e-05	0.0356699	5.11191
GO:0007169	Transmembrane receptor protein tyrosine kinase signaling pathway	Pdgfra	Pdgfra	Platelet-derived growth factor receptor alpha	6.84896e-05	0.0356699	5.11191
GO:0007169	Transmembrane receptor protein tyrosine kinase signaling pathway	Shc4	Shc4	SHC-transforming protein 4	6.84896e-05	0.0356699	5.11191
GO:0007169	Transmembrane receptor protein tyrosine kinase signaling pathway	Zap70	Zap70	Tyrosine-protein kinase ZAP-70	6.84896e-05	0.0356699	5.11191
GO:0007169	Transmembrane receptor protein tyrosine kinase signaling pathway	Flt1	Flt1	SFlt-1	6.84896e-05	0.0356699	5.11191
GO:0007169	Transmembrane receptor protein tyrosine kinase signaling pathway	Igf1r	Igf1r	Tyrosine-protein kinase receptor	6.84896e-05	0.0356699	5.11191
GO:0007169	Transmembrane receptor protein tyrosine kinase signaling pathway	Dok1	Dok1	Docking protein 1	6.84896e-05	0.0356699	5.11191
GO:0007169	Transmembrane receptor protein tyrosine kinase signaling pathway	Styk1	Styk1	Serine/threonine/tyrosine kinase 1	6.84896e-05	0.0356699	5.11191
GO:0007169	Transmembrane receptor protein tyrosine kinase signaling pathway	Lat	Lat	Linker for activation of T-cells family member 1	6.84896e-05	0.0356699	5.11191
GO:0006486	Protein glycosylation	St3gal2	St3gal2	CMP-N-acetylneuraminate-beta-galactosamide-alpha-2,3-sialyltransferase 2	0.000101216	0.0356699	4.0165
GO:0006486	Protein glycosylation	Ces2a	Ces2a	Pyrethroid hydrolase Ces2a	0.000101216	0.0356699	4.0165
GO:0006486	Protein glycosylation	Fut7	Fut7	Alpha-(1,3)-fucosyltransferase 7	0.000101216	0.0356699	4.0165
GO:0006486	Protein glycosylation	B4galnt1	B4galnt1	Beta-1,4 N-acetylgalactosaminyltransferase 1	0.000101216	0.0356699	4.0165
GO:0006486	Protein glycosylation	Extl1	Extl1	Exostoses (Multiple)-like 1	0.000101216	0.0356699	4.0165
GO:0006486	Protein glycosylation	St3gal1	St3gal1	CMP-N-acetylneuraminate-beta-galactosamide-alpha-2,3-sialyltransferase 1	0.000101216	0.0356699	4.0165
GO:0006486	Protein glycosylation	Gcnt4	Gcnt4	Beta-1,3-galactosyl-O-glycosyl-glycoprotein beta-1,6-N-acetylglucosaminyltransferase 4	0.000101216	0.0356699	4.0165
GO:0006486	Protein glycosylation	St6galnac4	St6galnac4	Putative uncharacterized protein	0.000101216	0.0356699	4.0165
GO:0006486	Protein glycosylation	St8sia6	St8sia6	ST8 alpha-N-acetyl-neuraminide alpha-2,8-sialyltransferase 6	0.000101216	0.0356699	4.0165
GO:0006486	Protein glycosylation	Galnt6	Galnt6	Polypeptide N-acetylgalactosaminyltransferase 6	0.000101216	0.0356699	4.0165
GO:0006486	Protein glycosylation	Fut2	Fut2	MCG23184	0.000101216	0.0356699	4.0165
GO:0009649	Entrainment of circadian clock	Atoh7	Atoh7	Protein atonal homolog 7	0.000107249	0.0356699	28.1155
GO:0009649	Entrainment of circadian clock	Bhlhe41	Bhlhe41	Class E basic helix-loop-helix protein 41	0.000107249	0.0356699	28.1155
GO:0009649	Entrainment of circadian clock	Bhlhe40	Bhlhe40	Class E basic helix-loop-helix protein 40	0.000107249	0.0356699	28.1155
GO:0060762	Regulation of branching involved in mammary gland duct morphogenesis	Tgfb1	Tgfb1	Transforming growth factor beta-1	0.000107249	0.0356699	28.1155
GO:0060762	Regulation of branching involved in mammary gland duct morphogenesis	Etv4	Etv4	ETS translocation variant 4	0.000107249	0.0356699	28.1155
GO:0060762	Regulation of branching involved in mammary gland duct morphogenesis	Etv5	Etv5	ETS translocation variant 5	0.000107249	0.0356699	28.1155
GO:0007194	Negative regulation of adenylate cyclase activity	Drd3	Drd3	D(3) dopamine receptor	0.000115064	0.0356699	14.9949
GO:0007194	Negative regulation of adenylate cyclase activity	Galr3	Galr3	Galanin receptor type 3	0.000115064	0.0356699	14.9949
GO:0007194	Negative regulation of adenylate cyclase activity	Oprm1	Oprm1	Mu opioid receptor mMOR-1R2	0.000115064	0.0356699	14.9949
GO:0007194	Negative regulation of adenylate cyclase activity	Galr1	Galr1	Galanin receptor type 1	0.000115064	0.0356699	14.9949

## Sheet: Ca
GOID	GOTerm	QueryID	Symbol	Description	P-Value	FDR	Enrichment
GO:0006952	Defense response	Defb21	Defb21	Beta-defensin	1.91393e-06	0.00176273	6.94502
GO:0006952	Defense response	Ido1	Ido1	Indoleamine 2,3-dioxygenase 1	1.91393e-06	0.00176273	6.94502
GO:0006952	Defense response	Defb13	Defb13	Beta-defensin 13	1.91393e-06	0.00176273	6.94502
GO:0006952	Defense response	Defb45	Defb45	Beta-defensin	1.91393e-06	0.00176273	6.94502
GO:0006952	Defense response	Defb30	Defb30	Beta-defensin 30	1.91393e-06	0.00176273	6.94502
GO:0006952	Defense response	Defb15	Defb15	Beta-defensin 15	1.91393e-06	0.00176273	6.94502
GO:0006952	Defense response	Defb12	Defb12	Beta-defensin 12	1.91393e-06	0.00176273	6.94502
GO:0006952	Defense response	AY761184	AY761184	CRS1C-6	1.91393e-06	0.00176273	6.94502
GO:0006952	Defense response	Defb29	Defb29	Beta-defensin 29	1.91393e-06	0.00176273	6.94502
GO:0006952	Defense response	Spag11a	Spag11a	Sperm associated antigen 11, isoform CRA_a	1.91393e-06	0.00176273	6.94502
GO:0042742	Defense response to bacterium	Defb21	Defb21	Beta-defensin	4.886e-06	0.00225	6.2603
GO:0042742	Defense response to bacterium	Muc5b	Muc5b	Protein Muc5b	4.886e-06	0.00225	6.2603
GO:0042742	Defense response to bacterium	Defb13	Defb13	Beta-defensin 13	4.886e-06	0.00225	6.2603
GO:0042742	Defense response to bacterium	Defb45	Defb45	Beta-defensin	4.886e-06	0.00225	6.2603
GO:0042742	Defense response to bacterium	Defb30	Defb30	Beta-defensin 30	4.886e-06	0.00225	6.2603
GO:0042742	Defense response to bacterium	Defb15	Defb15	Beta-defensin 15	4.886e-06	0.00225	6.2603
GO:0042742	Defense response to bacterium	Defb12	Defb12	Beta-defensin 12	4.886e-06	0.00225	6.2603
GO:0042742	Defense response to bacterium	Syk	Syk	Tyrosine-protein kinase SYK	4.886e-06	0.00225	6.2603
GO:0042742	Defense response to bacterium	Defb29	Defb29	Beta-defensin 29	4.886e-06	0.00225	6.2603
GO:0042742	Defense response to bacterium	Spag11a	Spag11a	Sperm associated antigen 11, isoform CRA_a	4.886e-06	0.00225	6.2603
GO:0007218	Neuropeptide signaling pathway	Qrfp	Qrfp	Qrfp protein	1.22392e-05	0.00375743	6.40053
GO:0007218	Neuropeptide signaling pathway	Glrb	Glrb	Glycine receptor subunit beta	1.22392e-05	0.00375743	6.40053
GO:0007218	Neuropeptide signaling pathway	Ntsr2	Ntsr2	Neurotensin receptor type 2	1.22392e-05	0.00375743	6.40053
GO:0007218	Neuropeptide signaling pathway	Prokr1	Prokr1	Prokineticin receptor 1	1.22392e-05	0.00375743	6.40053
GO:0007218	Neuropeptide signaling pathway	Cartpt	Cartpt	Cocaine- and amphetamine-regulated transcript protein	1.22392e-05	0.00375743	6.40053
GO:0007218	Neuropeptide signaling pathway	Pgr15l	Pgr15l	Protein Pgr15l	1.22392e-05	0.00375743	6.40053
GO:0007218	Neuropeptide signaling pathway	Ppy	Ppy	Pancreatic prohormone	1.22392e-05	0.00375743	6.40053
GO:0007218	Neuropeptide signaling pathway	Tac2	Tac2	Tachykinin-3	1.22392e-05	0.00375743	6.40053
GO:0007218	Neuropeptide signaling pathway	Grpr	Grpr	Gastrin-releasing peptide receptor	1.22392e-05	0.00375743	6.40053
GO:0035725	Sodium ion transmembrane transport	Slc9a2	Slc9a2	Sodium/hydrogen exchanger	0.000137581	0.0316779	6.22274
GO:0035725	Sodium ion transmembrane transport	Atp4a	Atp4a	Potassium-transporting ATPase alpha chain 1	0.000137581	0.0316779	6.22274
GO:0035725	Sodium ion transmembrane transport	Hcn4	Hcn4	MCG22630	0.000137581	0.0316779	6.22274
GO:0035725	Sodium ion transmembrane transport	Slc6a15	Slc6a15	Sodium-dependent neutral amino acid transporter B(0)AT2	0.000137581	0.0316779	6.22274
GO:0035725	Sodium ion transmembrane transport	Slc10a1	Slc10a1	Solute carrier family 10 (Sodium/bile acid cotransporter family), member 1, isoform CRA_d	0.000137581	0.0316779	6.22274
GO:0035725	Sodium ion transmembrane transport	Slc4a11	Slc4a11	Sodium bicarbonate transporter-like protein 11	0.000137581	0.0316779	6.22274
GO:0035725	Sodium ion transmembrane transport	Atp12a	Atp12a	Potassium-transporting ATPase alpha chain 2	0.000137581	0.0316779	6.22274
GO:0006885	Regulation of pH	Slc9a2	Slc9a2	Sodium/hydrogen exchanger	0.000223626	0.0411919	13.1698
GO:0006885	Regulation of pH	Rhcg	Rhcg	Rhesus blood group-associated C glycoprotein	0.000223626	0.0411919	13.1698
GO:0006885	Regulation of pH	Car12	Car12	Carbonic anhydrase 12	0.000223626	0.0411919	13.1698
GO:0006885	Regulation of pH	Atp12a	Atp12a	Potassium-transporting ATPase alpha chain 2	0.000223626	0.0411919	13.1698

## Sheet: Co
GOID	GOTerm	QueryID	Symbol	Description	P-Value	FDR	Enrichment
GO:0006564	L-serine biosynthetic process	Psph	Psph	Phosphoserine phosphatase	1.45837e-05	0.00902352	48.3976
GO:0006564	L-serine biosynthetic process	Phgdh	Phgdh	D-3-phosphoglycerate dehydrogenase	1.45837e-05	0.00902352	48.3976
GO:0006564	L-serine biosynthetic process	Psat1	Psat1	Phosphoserine aminotransferase	1.45837e-05	0.00902352	48.3976
GO:0055114	Oxidation-reduction process	Srxn1	Srxn1	Sulfiredoxin	1.46486e-05	0.00902352	2.39
GO:0055114	Oxidation-reduction process	Mthfd1l	Mthfd1l	Monofunctional C1-tetrahydrofolate synthase, mitochondrial	1.46486e-05	0.00902352	2.39
GO:0055114	Oxidation-reduction process	Foxred2	Foxred2	MCG147994	1.46486e-05	0.00902352	2.39
GO:0055114	Oxidation-reduction process	Akr1c19	Akr1c19	Aldo-keto reductase family 1, member C19	1.46486e-05	0.00902352	2.39
GO:0055114	Oxidation-reduction process	Cyp4f40	Cyp4f40	Cytochrome P450, family 4, subfamily f, polypeptide 40	1.46486e-05	0.00902352	2.39
GO:0055114	Oxidation-reduction process	Gpx3	Gpx3	Glutathione peroxidase 3	1.46486e-05	0.00902352	2.39
GO:0055114	Oxidation-reduction process	Cyp2j11	Cyp2j11	Protein Cyp2j11	1.46486e-05	0.00902352	2.39
GO:0055114	Oxidation-reduction process	Cyp2j13	Cyp2j13	Protein Cyp2j13	1.46486e-05	0.00902352	2.39
GO:0055114	Oxidation-reduction process	Nqo1	Nqo1	NAD(P)H dehydrogenase, quinone 1	1.46486e-05	0.00902352	2.39
GO:0055114	Oxidation-reduction process	Rdh1	Rdh1	Protein Rdh1	1.46486e-05	0.00902352	2.39
GO:0055114	Oxidation-reduction process	Phgdh	Phgdh	D-3-phosphoglycerate dehydrogenase	1.46486e-05	0.00902352	2.39
GO:0055114	Oxidation-reduction process	Sh3bgrl3	Sh3bgrl3	SH3 domain-binding glutamic acid-rich-like protein 3	1.46486e-05	0.00902352	2.39
GO:0055114	Oxidation-reduction process	Cyp4a29	Cyp4a29	Protein Cyp4a29	1.46486e-05	0.00902352	2.39
GO:0055114	Oxidation-reduction process	Cyp4a12b	Cyp4a12b	Protein Cyp4a12b	1.46486e-05	0.00902352	2.39
GO:0055114	Oxidation-reduction process	Gpx2	Gpx2	Glutathione peroxidase 2	1.46486e-05	0.00902352	2.39
GO:0055114	Oxidation-reduction process	Akr1c12	Akr1c12	Aldo-keto reductase family 1, member C12	1.46486e-05	0.00902352	2.39
GO:0055114	Oxidation-reduction process	Mthfd2	Mthfd2	Bifunctional methylenetetrahydrofolate dehydrogenase/cyclohydrolase, mitochondrial	1.46486e-05	0.00902352	2.39
GO:0055114	Oxidation-reduction process	Srd5a1	Srd5a1	Srd5a1 protein	1.46486e-05	0.00902352	2.39
GO:0055114	Oxidation-reduction process	Gldc	Gldc	Putative uncharacterized protein	1.46486e-05	0.00902352	2.39
GO:0055114	Oxidation-reduction process	Ndufb7	Ndufb7	NADH dehydrogenase [ubiquinone] 1 beta subcomplex subunit 7	1.46486e-05	0.00902352	2.39
GO:0055114	Oxidation-reduction process	Aldh3a1	Aldh3a1	Aldehyde dehydrogenase, dimeric NADP-preferring	1.46486e-05	0.00902352	2.39
GO:0055114	Oxidation-reduction process	Nos1	Nos1	Nitric oxide synthase, brain	1.46486e-05	0.00902352	2.39
GO:0055114	Oxidation-reduction process	Rdh9	Rdh9	Putative uncharacterized protein	1.46486e-05	0.00902352	2.39
GO:0055114	Oxidation-reduction process	Scd3	Scd3	Putative uncharacterized protein	1.46486e-05	0.00902352	2.39
GO:0055114	Oxidation-reduction process	Cyp2c38	Cyp2c38	Cytochrome P450, family 2, subfamily c, polypeptide 38	1.46486e-05	0.00902352	2.39
GO:0055114	Oxidation-reduction process	Hsd17b2	Hsd17b2	Estradiol 17-beta-dehydrogenase 2	1.46486e-05	0.00902352	2.39
GO:0055114	Oxidation-reduction process	Pah	Pah	Phenylalanine-4-hydroxylase	1.46486e-05	0.00902352	2.39
GO:0055114	Oxidation-reduction process	Cyp4a10	Cyp4a10	Cytochrome P450 4A10	1.46486e-05	0.00902352	2.39
GO:0055114	Oxidation-reduction process	Cox4i2	Cox4i2	Cytochrome c oxidase subunit 4 isoform 2, mitochondrial	1.46486e-05	0.00902352	2.39
GO:0042742	Defense response to bacterium	Defb22	Defb22	Beta-defensin 126	7.61196e-05	0.0312598	4.54437
GO:0042742	Defense response to bacterium	H2-K1	H2-K1	H-2 class I histocompatibility antigen, K-K alpha chain	7.61196e-05	0.0312598	4.54437
GO:0042742	Defense response to bacterium	Defb4	Defb4	Beta-defensin 4	7.61196e-05	0.0312598	4.54437
GO:0042742	Defense response to bacterium	Defb26	Defb26	Beta-defensin	7.61196e-05	0.0312598	4.54437
GO:0042742	Defense response to bacterium	Wfdc6a	Wfdc6a	WAP four-disulfide core domain protein 6A	7.61196e-05	0.0312598	4.54437
GO:0042742	Defense response to bacterium	Defb37	Defb37	Beta-defensin 37	7.61196e-05	0.0312598	4.54437
GO:0042742	Defense response to bacterium	Defb50	Defb50	Beta-defensin 50	7.61196e-05	0.0312598	4.54437
GO:0042742	Defense response to bacterium	Eppin	Eppin	Eppin	7.61196e-05	0.0312598	4.54437
GO:0042742	Defense response to bacterium	Defb14	Defb14	Defb14 protein	7.61196e-05	0.0312598	4.54437
GO:0042742	Defense response to bacterium	Defb38	Defb38	Defensin beta 38	7.61196e-05	0.0312598	4.54437
GO:0019464	Glycine decarboxylation via glycine cleavage system	Gcsh	Gcsh	Glycine cleavage system H protein, mitochondrial	0.000239434	0.0589965	64.5301
GO:0019464	Glycine decarboxylation via glycine cleavage system	Gldc	Gldc	Putative uncharacterized protein	0.000239434	0.0589965	64.5301
GO:0014718	Positive regulation of satellite cell activation involved in skeletal muscle regeneration	Capn3	Capn3	Calpain-3	0.000239434	0.0589965	64.5301
GO:0014718	Positive regulation of satellite cell activation involved in skeletal muscle regeneration	Sox15	Sox15	Protein SOX-15	0.000239434	0.0589965	64.5301

## Sheet: Cd
GOID	GOTerm	QueryID	Symbol	Description	P-Value	FDR	Enrichment
GO:0006935	Chemotaxis	Ccr1	Ccr1	C-C chemokine receptor type 1	1.8522e-09	2.26524e-06	9.16731
GO:0006935	Chemotaxis	S100a9	S100a9	Protein S100-A9	1.8522e-09	2.26524e-06	9.16731
GO:0006935	Chemotaxis	Ptafr	Ptafr	Platelet activating factor receptor	1.8522e-09	2.26524e-06	9.16731
GO:0006935	Chemotaxis	Ccl3	Ccl3	C-C motif chemokine 3	1.8522e-09	2.26524e-06	9.16731
GO:0006935	Chemotaxis	Ccr5	Ccr5	C-C chemokine receptor type 5	1.8522e-09	2.26524e-06	9.16731
GO:0006935	Chemotaxis	S100a8	S100a8	Protein S100-A8	1.8522e-09	2.26524e-06	9.16731
GO:0006935	Chemotaxis	Ccr3	Ccr3	Probable C-C chemokine receptor type 3	1.8522e-09	2.26524e-06	9.16731
GO:0006935	Chemotaxis	Ear2	Ear2	Uncharacterized protein	1.8522e-09	2.26524e-06	9.16731
GO:0006935	Chemotaxis	Ccl2	Ccl2	C-C motif chemokine 2	1.8522e-09	2.26524e-06	9.16731
GO:0006935	Chemotaxis	Gm5127	Gm5127	Predicted gene, EG331493	1.8522e-09	2.26524e-06	9.16731
GO:0006935	Chemotaxis	Ccl4	Ccl4	C-C motif chemokine 4	1.8522e-09	2.26524e-06	9.16731
GO:0006935	Chemotaxis	Ccr1l1	Ccr1l1	C-C chemokine receptor 1-like protein 1	1.8522e-09	2.26524e-06	9.16731
GO:0006935	Chemotaxis	Ccl6	Ccl6	C-C motif chemokine 6	1.8522e-09	2.26524e-06	9.16731
GO:0006955	Immune response	Oas1g	Oas1g	Oas1g protein	9.49508e-09	5.80624e-06	5.69315
GO:0006955	Immune response	H2-T24	H2-T24	Protein H2-T24	9.49508e-09	5.80624e-06	5.69315
GO:0006955	Immune response	Ccr1	Ccr1	C-C chemokine receptor type 1	9.49508e-09	5.80624e-06	5.69315
GO:0006955	Immune response	Ccl3	Ccl3	C-C motif chemokine 3	9.49508e-09	5.80624e-06	5.69315
GO:0006955	Immune response	Tlr7	Tlr7	Toll-like receptor 7	9.49508e-09	5.80624e-06	5.69315
GO:0006955	Immune response	Clec4e	Clec4e	C-type lectin domain family 4, member e, isoform CRA_a	9.49508e-09	5.80624e-06	5.69315
GO:0006955	Immune response	Ccr5	Ccr5	C-C chemokine receptor type 5	9.49508e-09	5.80624e-06	5.69315
GO:0006955	Immune response	Tnfsf9	Tnfsf9	Tumor necrosis factor ligand superfamily member 9	9.49508e-09	5.80624e-06	5.69315
GO:0006955	Immune response	Azgp1	Azgp1	Zinc-alpha-2-glycoprotein	9.49508e-09	5.80624e-06	5.69315
GO:0006955	Immune response	Oas1a	Oas1a	2'-5'-oligoadenylate synthase 1A	9.49508e-09	5.80624e-06	5.69315
GO:0006955	Immune response	Cd28	Cd28	T-cell-specific surface glycoprotein CD28	9.49508e-09	5.80624e-06	5.69315
GO:0006955	Immune response	Oas1c	Oas1c	Protein Oas1c	9.49508e-09	5.80624e-06	5.69315
GO:0006955	Immune response	Ccl2	Ccl2	C-C motif chemokine 2	9.49508e-09	5.80624e-06	5.69315
GO:0006955	Immune response	H2-M9	H2-M9	Histocompatibility 2, M region locus 9, isoform CRA_b	9.49508e-09	5.80624e-06	5.69315
GO:0006955	Immune response	Ccl4	Ccl4	C-C motif chemokine 4	9.49508e-09	5.80624e-06	5.69315
GO:0006955	Immune response	Ccr1l1	Ccr1l1	C-C chemokine receptor 1-like protein 1	9.49508e-09	5.80624e-06	5.69315
GO:0006955	Immune response	Ccl6	Ccl6	C-C motif chemokine 6	9.49508e-09	5.80624e-06	5.69315
GO:0030595	Leukocyte chemotaxis	Ccr1	Ccr1	C-C chemokine receptor type 1	1.45038e-07	5.9127e-05	36.1404
GO:0030595	Leukocyte chemotaxis	S100a9	S100a9	Protein S100-A9	1.45038e-07	5.9127e-05	36.1404
GO:0030595	Leukocyte chemotaxis	Ccl3	Ccl3	C-C motif chemokine 3	1.45038e-07	5.9127e-05	36.1404
GO:0030595	Leukocyte chemotaxis	Ccl4	Ccl4	C-C motif chemokine 4	1.45038e-07	5.9127e-05	36.1404
GO:0030595	Leukocyte chemotaxis	Coro1a	Coro1a	Coronin-1A	1.45038e-07	5.9127e-05	36.1404
GO:0006954	Inflammatory response	Hck	Hck	Non-specific protein-tyrosine kinase	1.11884e-06	0.000342084	4.59736
GO:0006954	Inflammatory response	Ccr1	Ccr1	C-C chemokine receptor type 1	1.11884e-06	0.000342084	4.59736
GO:0006954	Inflammatory response	S100a9	S100a9	Protein S100-A9	1.11884e-06	0.000342084	4.59736
GO:0006954	Inflammatory response	Ptafr	Ptafr	Platelet activating factor receptor	1.11884e-06	0.000342084	4.59736
GO:0006954	Inflammatory response	Ccl3	Ccl3	C-C motif chemokine 3	1.11884e-06	0.000342084	4.59736
GO:0006954	Inflammatory response	Tlr7	Tlr7	Toll-like receptor 7	1.11884e-06	0.000342084	4.59736
GO:0006954	Inflammatory response	Olr1	Olr1	Oxidized low-density lipoprotein receptor 1	1.11884e-06	0.000342084	4.59736
GO:0006954	Inflammatory response	Ccr5	Ccr5	C-C chemokine receptor type 5	1.11884e-06	0.000342084	4.59736
GO:0006954	Inflammatory response	S100a8	S100a8	Protein S100-A8	1.11884e-06	0.000342084	4.59736
GO:0006954	Inflammatory response	Ccr3	Ccr3	Probable C-C chemokine receptor type 3	1.11884e-06	0.000342084	4.59736
GO:0006954	Inflammatory response	Agtr2	Agtr2	Type-2 angiotensin II receptor	1.11884e-06	0.000342084	4.59736
GO:0006954	Inflammatory response	Ccl2	Ccl2	C-C motif chemokine 2	1.11884e-06	0.000342084	4.59736
GO:0006954	Inflammatory response	Naip2	Naip2	Baculoviral IAP repeat-containing protein 1b	1.11884e-06	0.000342084	4.59736
GO:0006954	Inflammatory response	Ccl4	Ccl4	C-C motif chemokine 4	1.11884e-06	0.000342084	4.59736
GO:0006954	Inflammatory response	Ccr1l1	Ccr1l1	C-C chemokine receptor 1-like protein 1	1.11884e-06	0.000342084	4.59736
GO:0090026	Positive regulation of monocyte chemotaxis	S100a14	S100a14	Protein S100-A14	5.33991e-06	0.00130614	31.5407
GO:0090026	Positive regulation of monocyte chemotaxis	Ccr1	Ccr1	C-C chemokine receptor type 1	5.33991e-06	0.00130614	31.5407
GO:0090026	Positive regulation of monocyte chemotaxis	Ccl2	Ccl2	C-C motif chemokine 2	5.33991e-06	0.00130614	31.5407
GO:0090026	Positive regulation of monocyte chemotaxis	Ccr1l1	Ccr1l1	C-C chemokine receptor 1-like protein 1	5.33991e-06	0.00130614	31.5407

## Sheet: Dd
GOID	GOTerm	QueryID	Symbol	Description	P-Value	FDR	Enrichment
GO:0071805	potassium ion transmembrane transport	Slc9a7	Slc9a7	Sodium/hydrogen exchanger 7	7.83275e-11	1.21977e-07	6.60591
GO:0071805	potassium ion transmembrane transport	Kcnv2	Kcnv2	Potassium voltage-gated channel subfamily V member 2	7.83275e-11	1.21977e-07	6.60591
GO:0071805	potassium ion transmembrane transport	Kcnq5	Kcnq5	Voltage-gated potassium channel type Kv7.5	7.83275e-11	1.21977e-07	6.60591
GO:0071805	potassium ion transmembrane transport	Kcnn2	Kcnn2	Small conductance calcium-activated potassium channel subfamily N member 2	7.83275e-11	1.21977e-07	6.60591
GO:0071805	potassium ion transmembrane transport	Kcna2	Kcna2	Potassium voltage-gated channel subfamily A member 2	7.83275e-11	1.21977e-07	6.60591
GO:0071805	potassium ion transmembrane transport	Kcns3	Kcns3	Putative uncharacterized protein	7.83275e-11	1.21977e-07	6.60591
GO:0071805	potassium ion transmembrane transport	Kcnk3	Kcnk3	Potassium channel subfamily K member 3	7.83275e-11	1.21977e-07	6.60591
GO:0071805	potassium ion transmembrane transport	Scn1a	Scn1a	Sodium channel protein	7.83275e-11	1.21977e-07	6.60591
GO:0071805	potassium ion transmembrane transport	Kcnc1	Kcnc1	Potassium voltage-gated channel subfamily C member 1	7.83275e-11	1.21977e-07	6.60591
GO:0071805	potassium ion transmembrane transport	Slc24a3	Slc24a3	Sodium/potassium/calcium exchanger 3	7.83275e-11	1.21977e-07	6.60591
GO:0071805	potassium ion transmembrane transport	Kcnq4	Kcnq4	Potassium voltage-gated channel subfamily KQT member 4	7.83275e-11	1.21977e-07	6.60591
GO:0071805	potassium ion transmembrane transport	Kcnj2	Kcnj2	Inward rectifier potassium channel 2	7.83275e-11	1.21977e-07	6.60591
GO:0071805	potassium ion transmembrane transport	Kcnj5	Kcnj5	Potassium inwardly-rectifying channel subfamily J member 5	7.83275e-11	1.21977e-07	6.60591
GO:0071805	potassium ion transmembrane transport	Kcnt2	Kcnt2	Protein Kcnt2	7.83275e-11	1.21977e-07	6.60591
GO:0071805	potassium ion transmembrane transport	Kcna6	Kcna6	Potassium voltage-gated channel subfamily A member 6	7.83275e-11	1.21977e-07	6.60591
GO:0071805	potassium ion transmembrane transport	Kcng1	Kcng1	Potassium voltage-gated channel subfamily G member 1	7.83275e-11	1.21977e-07	6.60591
GO:0071805	potassium ion transmembrane transport	Fxyd4	Fxyd4	FXYD domain-containing ion transport regulator 4	7.83275e-11	1.21977e-07	6.60591
GO:0071805	potassium ion transmembrane transport	Abcc9	Abcc9	Hemi ATP-binding cassette protein SUR2A-55	7.83275e-11	1.21977e-07	6.60591
GO:0071805	potassium ion transmembrane transport	Kcnh5	Kcnh5	Potassium voltage-gated channel, subfamily H (Eag-related), member 5	7.83275e-11	1.21977e-07	6.60591
GO:0006813	potassium ion transport	Slc9a7	Slc9a7	Sodium/hydrogen exchanger 7	1.17455e-10	1.21977e-07	6.4569
GO:0006813	potassium ion transport	Kcnv2	Kcnv2	Potassium voltage-gated channel subfamily V member 2	1.17455e-10	1.21977e-07	6.4569
GO:0006813	potassium ion transport	Kcnq5	Kcnq5	Voltage-gated potassium channel type Kv7.5	1.17455e-10	1.21977e-07	6.4569
GO:0006813	potassium ion transport	Kcnn2	Kcnn2	Small conductance calcium-activated potassium channel subfamily N member 2	1.17455e-10	1.21977e-07	6.4569
GO:0006813	potassium ion transport	Kcna2	Kcna2	Potassium voltage-gated channel subfamily A member 2	1.17455e-10	1.21977e-07	6.4569
GO:0006813	potassium ion transport	Kcns3	Kcns3	Putative uncharacterized protein	1.17455e-10	1.21977e-07	6.4569
GO:0006813	potassium ion transport	Kcnk3	Kcnk3	Potassium channel subfamily K member 3	1.17455e-10	1.21977e-07	6.4569
GO:0006813	potassium ion transport	Scn1a	Scn1a	Sodium channel protein	1.17455e-10	1.21977e-07	6.4569
GO:0006813	potassium ion transport	Kcnc1	Kcnc1	Potassium voltage-gated channel subfamily C member 1	1.17455e-10	1.21977e-07	6.4569
GO:0006813	potassium ion transport	Slc24a3	Slc24a3	Sodium/potassium/calcium exchanger 3	1.17455e-10	1.21977e-07	6.4569
GO:0006813	potassium ion transport	Kcnq4	Kcnq4	Potassium voltage-gated channel subfamily KQT member 4	1.17455e-10	1.21977e-07	6.4569
GO:0006813	potassium ion transport	Kcnj2	Kcnj2	Inward rectifier potassium channel 2	1.17455e-10	1.21977e-07	6.4569
GO:0006813	potassium ion transport	Kcnj16	Kcnj16	Inward rectifier potassium channel 16	1.17455e-10	1.21977e-07	6.4569
GO:0006813	potassium ion transport	Kcnj5	Kcnj5	Potassium inwardly-rectifying channel subfamily J member 5	1.17455e-10	1.21977e-07	6.4569
GO:0006813	potassium ion transport	Kcnt2	Kcnt2	Protein Kcnt2	1.17455e-10	1.21977e-07	6.4569
GO:0006813	potassium ion transport	Kcna6	Kcna6	Potassium voltage-gated channel subfamily A member 6	1.17455e-10	1.21977e-07	6.4569
GO:0006813	potassium ion transport	Kcng1	Kcng1	Potassium voltage-gated channel subfamily G member 1	1.17455e-10	1.21977e-07	6.4569
GO:0006813	potassium ion transport	Abcc9	Abcc9	Hemi ATP-binding cassette protein SUR2A-55	1.17455e-10	1.21977e-07	6.4569
GO:0006813	potassium ion transport	Kcnh5	Kcnh5	Potassium voltage-gated channel, subfamily H (Eag-related), member 5	1.17455e-10	1.21977e-07	6.4569
GO:0006811	ion transport	Slc9a7	Slc9a7	Sodium/hydrogen exchanger 7	1.50564e-09	1.04241e-06	2.92546
GO:0006811	ion transport	Kcnv2	Kcnv2	Potassium voltage-gated channel subfamily V member 2	1.50564e-09	1.04241e-06	2.92546
GO:0006811	ion transport	Slc17a8	Slc17a8	Vesicular glutamate transporter 3	1.50564e-09	1.04241e-06	2.92546
GO:0006811	ion transport	Kcnq5	Kcnq5	Voltage-gated potassium channel type Kv7.5	1.50564e-09	1.04241e-06	2.92546
GO:0006811	ion transport	Kcnn2	Kcnn2	Small conductance calcium-activated potassium channel subfamily N member 2	1.50564e-09	1.04241e-06	2.92546
GO:0006811	ion transport	Slc39a8	Slc39a8	Zinc transporter ZIP8	1.50564e-09	1.04241e-06	2.92546
GO:0006811	ion transport	Aqp2	Aqp2	Aquaporin-2	1.50564e-09	1.04241e-06	2.92546
GO:0006811	ion transport	Kcna2	Kcna2	Potassium voltage-gated channel subfamily A member 2	1.50564e-09	1.04241e-06	2.92546
GO:0006811	ion transport	Slc17a4	Slc17a4	Probable small intestine urate exporter	1.50564e-09	1.04241e-06	2.92546
GO:0006811	ion transport	Slc8a1	Slc8a1	Sodium/calcium exchanger 1	1.50564e-09	1.04241e-06	2.92546
GO:0006811	ion transport	Slc38a1	Slc38a1	Putative uncharacterized protein	1.50564e-09	1.04241e-06	2.92546
GO:0006811	ion transport	Ryr2	Ryr2	Ryanodine receptor 2	1.50564e-09	1.04241e-06	2.92546
GO:0006811	ion transport	Kcns3	Kcns3	Putative uncharacterized protein	1.50564e-09	1.04241e-06	2.92546
GO:0006811	ion transport	Fam26e	Fam26e	Putative uncharacterized protein	1.50564e-09	1.04241e-06	2.92546
GO:0006811	ion transport	Mcub	Ccdc109b	Calcium uniporter regulatory subunit MCUb, mitochondrial	1.50564e-09	1.04241e-06	2.92546
GO:0006811	ion transport	Kcnk3	Kcnk3	Potassium channel subfamily K member 3	1.50564e-09	1.04241e-06	2.92546
GO:0006811	ion transport	Scn1a	Scn1a	Sodium channel protein	1.50564e-09	1.04241e-06	2.92546
GO:0006811	ion transport	Slc4a3	Slc4a3	Anion exchange protein 3	1.50564e-09	1.04241e-06	2.92546
GO:0006811	ion transport	Cacna1c	Cacna1c	Voltage-dependent L-type calcium channel subunit alpha-1C	1.50564e-09	1.04241e-06	2.92546
GO:0006811	ion transport	Kcnc1	Kcnc1	Potassium voltage-gated channel subfamily C member 1	1.50564e-09	1.04241e-06	2.92546
GO:0006811	ion transport	Slc24a3	Slc24a3	Sodium/potassium/calcium exchanger 3	1.50564e-09	1.04241e-06	2.92546
GO:0006811	ion transport	Kcnq4	Kcnq4	Potassium voltage-gated channel subfamily KQT member 4	1.50564e-09	1.04241e-06	2.92546
GO:0006811	ion transport	Kcnj2	Kcnj2	Inward rectifier potassium channel 2	1.50564e-09	1.04241e-06	2.92546
GO:0006811	ion transport	Kcnj16	Kcnj16	Inward rectifier potassium channel 16	1.50564e-09	1.04241e-06	2.92546
GO:0006811	ion transport	Grin3a	Grin3a	Protein Grin3a	1.50564e-09	1.04241e-06	2.92546
GO:0006811	ion transport	Tcn2	Tcn2	Transcobalamin-2	1.50564e-09	1.04241e-06	2.92546
GO:0006811	ion transport	Nipal1	Nipal1	Npal1 protein	1.50564e-09	1.04241e-06	2.92546
GO:0006811	ion transport	Kcnj5	Kcnj5	Potassium inwardly-rectifying channel subfamily J member 5	1.50564e-09	1.04241e-06	2.92546
GO:0006811	ion transport	Cnnm1	Cnnm1	Ancient conserved domain protein 1	1.50564e-09	1.04241e-06	2.92546
GO:0006811	ion transport	Asic4	Asic4	Acid-sensing ion channel 4	1.50564e-09	1.04241e-06	2.92546
GO:0006811	ion transport	Kcna6	Kcna6	Potassium voltage-gated channel subfamily A member 6	1.50564e-09	1.04241e-06	2.92546
GO:0006811	ion transport	Ryr3	Ryr3	Ryanodine receptor 3	1.50564e-09	1.04241e-06	2.92546
GO:0006811	ion transport	Cldn15	Cldn15	Claudin-15	1.50564e-09	1.04241e-06	2.92546
GO:0006811	ion transport	Kcng1	Kcng1	Potassium voltage-gated channel subfamily G member 1	1.50564e-09	1.04241e-06	2.92546
GO:0006811	ion transport	Fxyd4	Fxyd4	FXYD domain-containing ion transport regulator 4	1.50564e-09	1.04241e-06	2.92546
GO:0006811	ion transport	P2rx1	P2rx1	P2X purinoceptor 1	1.50564e-09	1.04241e-06	2.92546
GO:0006811	ion transport	Slc22a3	Slc22a3	Solute carrier family 22 (Organic cation transporter), member 3	1.50564e-09	1.04241e-06	2.92546
GO:0006811	ion transport	Trpv2	Trpv2	Transient receptor potential cation channel subfamily V member 2	1.50564e-09	1.04241e-06	2.92546
GO:0006811	ion transport	Slc5a8	Slc5a8	Putative uncharacterized protein	1.50564e-09	1.04241e-06	2.92546
GO:0006811	ion transport	Kcnh5	Kcnh5	Potassium voltage-gated channel, subfamily H (Eag-related), member 5	1.50564e-09	1.04241e-06	2.92546
GO:0055085	transmembrane transport	Slc2a4	Slc2a4	Solute carrier family 2, facilitated glucose transporter member 4	3.17671e-08	1.64951e-05	3.02583
GO:0055085	transmembrane transport	Sv2a	Sv2a	Synaptic vesicle glycoprotein 2A	3.17671e-08	1.64951e-05	3.02583
GO:0055085	transmembrane transport	Slc9a7	Slc9a7	Sodium/hydrogen exchanger 7	3.17671e-08	1.64951e-05	3.02583
GO:0055085	transmembrane transport	Kcnv2	Kcnv2	Potassium voltage-gated channel subfamily V member 2	3.17671e-08	1.64951e-05	3.02583
GO:0055085	transmembrane transport	Slc17a8	Slc17a8	Vesicular glutamate transporter 3	3.17671e-08	1.64951e-05	3.02583
GO:0055085	transmembrane transport	Slc2a12	Slc2a12	Solute carrier family 2 (Facilitated glucose transporter), member 12	3.17671e-08	1.64951e-05	3.02583
GO:0055085	transmembrane transport	Kcnq5	Kcnq5	Voltage-gated potassium channel type Kv7.5	3.17671e-08	1.64951e-05	3.02583
GO:0055085	transmembrane transport	Slc39a8	Slc39a8	Zinc transporter ZIP8	3.17671e-08	1.64951e-05	3.02583
GO:0055085	transmembrane transport	Slc25a43	Slc25a43	Solute carrier family 25 member 43	3.17671e-08	1.64951e-05	3.02583
GO:0055085	transmembrane transport	Aqp2	Aqp2	Aquaporin-2	3.17671e-08	1.64951e-05	3.02583
GO:0055085	transmembrane transport	Kcna2	Kcna2	Potassium voltage-gated channel subfamily A member 2	3.17671e-08	1.64951e-05	3.02583
GO:0055085	transmembrane transport	Slc17a4	Slc17a4	Probable small intestine urate exporter	3.17671e-08	1.64951e-05	3.02583
GO:0055085	transmembrane transport	Slc8a1	Slc8a1	Sodium/calcium exchanger 1	3.17671e-08	1.64951e-05	3.02583
GO:0055085	transmembrane transport	Slc38a1	Slc38a1	Putative uncharacterized protein	3.17671e-08	1.64951e-05	3.02583
GO:0055085	transmembrane transport	Abcb1b	Abcb1b	MCG1177	3.17671e-08	1.64951e-05	3.02583
GO:0055085	transmembrane transport	Ryr2	Ryr2	Ryanodine receptor 2	3.17671e-08	1.64951e-05	3.02583
GO:0055085	transmembrane transport	Kcns3	Kcns3	Putative uncharacterized protein	3.17671e-08	1.64951e-05	3.02583
GO:0055085	transmembrane transport	Scn1a	Scn1a	Sodium channel protein	3.17671e-08	1.64951e-05	3.02583
GO:0055085	transmembrane transport	Cacna1c	Cacna1c	Voltage-dependent L-type calcium channel subunit alpha-1C	3.17671e-08	1.64951e-05	3.02583
GO:0055085	transmembrane transport	Kcnc1	Kcnc1	Potassium voltage-gated channel subfamily C member 1	3.17671e-08	1.64951e-05	3.02583
GO:0055085	transmembrane transport	Slc24a3	Slc24a3	Sodium/potassium/calcium exchanger 3	3.17671e-08	1.64951e-05	3.02583
GO:0055085	transmembrane transport	Kcnq4	Kcnq4	Potassium voltage-gated channel subfamily KQT member 4	3.17671e-08	1.64951e-05	3.02583
GO:0055085	transmembrane transport	Kcna6	Kcna6	Potassium voltage-gated channel subfamily A member 6	3.17671e-08	1.64951e-05	3.02583
GO:0055085	transmembrane transport	Ryr3	Ryr3	Ryanodine receptor 3	3.17671e-08	1.64951e-05	3.02583
GO:0055085	transmembrane transport	Gjc3	Gjc3	Gap junction gamma-3 protein	3.17671e-08	1.64951e-05	3.02583
GO:0055085	transmembrane transport	Kcng1	Kcng1	Potassium voltage-gated channel subfamily G member 1	3.17671e-08	1.64951e-05	3.02583
GO:0055085	transmembrane transport	Slc6a2	Slc6a2	Sodium-dependent noradrenaline transporter	3.17671e-08	1.64951e-05	3.02583
GO:0055085	transmembrane transport	Slc22a3	Slc22a3	Solute carrier family 22 (Organic cation transporter), member 3	3.17671e-08	1.64951e-05	3.02583
GO:0055085	transmembrane transport	Trpv2	Trpv2	Transient receptor potential cation channel subfamily V member 2	3.17671e-08	1.64951e-05	3.02583
GO:0055085	transmembrane transport	Abcc9	Abcc9	Hemi ATP-binding cassette protein SUR2A-55	3.17671e-08	1.64951e-05	3.02583
GO:0055085	transmembrane transport	Slc5a8	Slc5a8	Putative uncharacterized protein	3.17671e-08	1.64951e-05	3.02583
GO:0055085	transmembrane transport	Kcnh5	Kcnh5	Potassium voltage-gated channel, subfamily H (Eag-related), member 5	3.17671e-08	1.64951e-05	3.02583
GO:0034765	regulation of ion transmembrane transport	Il1rapl1	Il1rapl1	Interleukin-1 receptor accessory protein-like 1	1.01574e-07	4.21938e-05	4.54508
GO:0034765	regulation of ion transmembrane transport	Kcnv2	Kcnv2	Potassium voltage-gated channel subfamily V member 2	1.01574e-07	4.21938e-05	4.54508
GO:0034765	regulation of ion transmembrane transport	Grm7	Grm7	Metabotropic glutamate receptor 7	1.01574e-07	4.21938e-05	4.54508
GO:0034765	regulation of ion transmembrane transport	Kcnq5	Kcnq5	Voltage-gated potassium channel type Kv7.5	1.01574e-07	4.21938e-05	4.54508
GO:0034765	regulation of ion transmembrane transport	Kcna2	Kcna2	Potassium voltage-gated channel subfamily A member 2	1.01574e-07	4.21938e-05	4.54508
GO:0034765	regulation of ion transmembrane transport	Kcns3	Kcns3	Putative uncharacterized protein	1.01574e-07	4.21938e-05	4.54508
GO:0034765	regulation of ion transmembrane transport	Kcnk3	Kcnk3	Potassium channel subfamily K member 3	1.01574e-07	4.21938e-05	4.54508
GO:0034765	regulation of ion transmembrane transport	Scn1a	Scn1a	Sodium channel protein	1.01574e-07	4.21938e-05	4.54508
GO:0034765	regulation of ion transmembrane transport	Cacna1c	Cacna1c	Voltage-dependent L-type calcium channel subunit alpha-1C	1.01574e-07	4.21938e-05	4.54508
GO:0034765	regulation of ion transmembrane transport	Kcnc1	Kcnc1	Potassium voltage-gated channel subfamily C member 1	1.01574e-07	4.21938e-05	4.54508
GO:0034765	regulation of ion transmembrane transport	Kcnq4	Kcnq4	Potassium voltage-gated channel subfamily KQT member 4	1.01574e-07	4.21938e-05	4.54508
GO:0034765	regulation of ion transmembrane transport	Kcnj2	Kcnj2	Inward rectifier potassium channel 2	1.01574e-07	4.21938e-05	4.54508
GO:0034765	regulation of ion transmembrane transport	Kcnj16	Kcnj16	Inward rectifier potassium channel 16	1.01574e-07	4.21938e-05	4.54508
GO:0034765	regulation of ion transmembrane transport	Kcnj5	Kcnj5	Potassium inwardly-rectifying channel subfamily J member 5	1.01574e-07	4.21938e-05	4.54508
GO:0034765	regulation of ion transmembrane transport	Kcnt2	Kcnt2	Protein Kcnt2	1.01574e-07	4.21938e-05	4.54508
GO:0034765	regulation of ion transmembrane transport	Kcna6	Kcna6	Potassium voltage-gated channel subfamily A member 6	1.01574e-07	4.21938e-05	4.54508
GO:0034765	regulation of ion transmembrane transport	Kcng1	Kcng1	Potassium voltage-gated channel subfamily G member 1	1.01574e-07	4.21938e-05	4.54508
GO:0034765	regulation of ion transmembrane transport	Kcnh5	Kcnh5	Potassium voltage-gated channel, subfamily H (Eag-related), member 5	1.01574e-07	4.21938e-05	4.54508
