# Supplementary material for: Anatomical Transcriptome Atlas of the Male Mouse Reproductive System During Aging
Source: Front Cell Dev Biol. 2022 Feb 8;9:782824. doi: 10.3389/fcell.2021.782824 (PMC8861499; doi:10.3389/fcell.2021.782824)
Supplement: Supplementary file 11 [file Table7.XLSX]

## Sheet: Sheet1
Gene ID	Gene name	N1-FPKM	N2-FPKM	N3-FPKM	Gene biotype	Description
ENSG00000122304	PRM2	405.503	853.325	875.043	protein_coding	protamine 2 [Source:HGNC Symbol;Acc:HGNC:9448]
ENSG00000175646	PRM1	234.178	931.762	613.251	protein_coding	protamine 1 [Source:HGNC Symbol;Acc:HGNC:9447]
ENSG00000124490	CRISP2	32.3753	31.1945	79.0898	protein_coding	ornithine decarboxylase antizyme 3 [Source:HGNC Symbol;Acc:HGNC:8097]
ENSG00000118245	TNP1	54.3964	29.2534	57.9862	protein_coding	cysteine rich secretory protein 2 [Source:HGNC Symbol;Acc:HGNC:12024]
ENSG00000143450	OAZ3	19.6539	14.5688	19.6695	protein_coding	outer dense fiber of sperm tails 1 [Source:HGNC Symbol;Acc:HGNC:8113]
ENSG00000147081	AKAP4	8.3832	29.3042	11.4972	protein_coding	t-complex 11 [Source:HGNC Symbol;Acc:HGNC:11658]
ENSG00000155087	ODF1	0.662279	23.5067	21.6626	protein_coding	lactate dehydrogenase C [Source:HGNC Symbol;Acc:HGNC:6544]
ENSG00000124678	TCP11	12.3895	11.4934	13.3809	protein_coding	glyceraldehyde-3-phosphate dehydrogenase, spermatogenic [Source:HGNC Symbol;Acc:HGNC:24864]
ENSG00000105679	GAPDHS	3.60451	23.2613	3.05874	protein_coding	transition protein 1 [Source:HGNC Symbol;Acc:HGNC:11951]

## Sheet: Sheet2
Uniprot IDs	Gene names	Study(ies)	Entry name	Original ID in Ihor Batruch et al.	Original ID in A.D. Rolland et al.	Status	Protein name	Protein Length (Amino acid #)	EntrezGene IDs
P49223	SPINT3	Ihor Batruch et al. (2011); A.D. Rolland et al. (2013)	SPIT3_HUMAN	IPI00026482	P49223	reviewed	Kunitz-type protease inhibitor 3 (HKIB9)	89	10816
Q5GAN3	RNASE13	Ihor Batruch et al. (2011); A.D. Rolland et al. (2013)	RNS13_HUMAN	IPI00456130	Q5GAN3	reviewed	Ribonuclease-like protein 13	156	440163
Q8NEX5	WFDC9 WAP9	Ihor Batruch et al. (2011); A.D. Rolland et al. (2013)	WFDC9_HUMAN	IPI00168790	Q8NEX5	reviewed	Protein WFDC9	89	259240
Q8IUB5	WFDC13 C20orf138 WAP13	Ihor Batruch et al. (2011); A.D. Rolland et al. (2013)	WFD13_HUMAN	IPI00216708	Q8IUB5	reviewed	Protein WFDC13	93	164237
Q9UKQ2	ADAM28 ADAM23 MDCL	Ihor Batruch et al. (2011); A.D. Rolland et al. (2013)	ADA28_HUMAN	IPI00007709,IPI00873540,IPI00909497	Q9UKQ2	reviewed	Disintegrin and metalloproteinase domain-containing protein 28 (ADAM 28) (EC 3.4.24.-) (Epididymial metalloproteinase-like, disintegrin-like, and cysteine-rich protein II) (eMDC II) (Metalloproteinase-like, disintegrin-like, and cysteine-rich protein L) (MDC-L)	775	10863
