# Supplementary material for: Anatomical Transcriptome Atlas of the Male Mouse Reproductive System During Aging
Source: Front Cell Dev Biol. 2022 Feb 8;9:782824. doi: 10.3389/fcell.2021.782824 (PMC8861499; doi:10.3389/fcell.2021.782824)
Supplement: Supplementary file 12 [file Table8.XLSX]

## Sheet: Te
Gene ID	Gene name	log2FC	Pvalue	FDR	3M-Te1	3M-Te2	3M-Te3	3M-Te4	21M-Te1	21M-Te2	21M-Te3	21M-Te4
ENSMUSG00000065987	Cd209b	4.48491	0.000687533	1	0	0	0	0	0.0498286	0.151398	0.127398	0.105481
ENSMUSG00000022871	Fetub	3.95775	1.66671e-21	1.02419e-17	0.589667	0.944286	0.173089	0.413411	9.01034	7.26122	9.14874	7.21247
ENSMUSG00000067704	Wfdc13	3.85249	0.0127016	1	0	0	0	0	0	0.28743	0.14512	0.100128
ENSMUSG00000104267	Gm20807	3.85072	0.0111187	1	0	0	0	0	0.0760482	0.269573	0.0388869	0.0402461
ENSMUSG00000042499	Hoxd11	3.79683	0.000107429	1	0	0.0152122	0.0161728	0.017558	0.105614	0.275052	0.13887	0.143724
ENSMUSG00000041202	Pla2g2d	3.73536	1.45735e-09	1	0.0755351	0.0709082	0	0.0545619	0.375082	0.973443	0.623339	0.669939
ENSMUSG00000079263	Gm6614	3.37214	0.0158747	1	0	0.0209059	0	0	0.0622043	0.147	0.0424106	0.0219464
ENSMUSG00000029343	Crybb1	3.25839	0.019878	1	0	0	0	0.067027	0.115193	0.35	0.117807	0.121925
ENSMUSG00000031495	Cd209d	3.13316	0.0303248	1	0	0.0557338	0	0	0.0552777	0.223939	0.28266	0.0585079
ENSMUSG00000049723	Mmp12	3.00611	0.0410463	1	0	0	0.0121712	0	0.0340636	0.0114998	0.0116122	0.0600903
ENSMUSG00000049093	Il23r	2.76576	0.0376687	1	0	0	0.0218866	0.0237612	0.122509	0.0620378	0.0208814	0.086445
ENSMUSG00000102388	Gm33815	2.64935	0.00519741	1	0.0341223	0	0.0340549	0.0739435	0.12708	0.289587	0.227436	0.201759
ENSMUSG00000029816	Gpnmb	2.54346	0.000273941	1	0.0147424	0.0276787	0.0294266	0.0479204	0.233343	0.125115	0.0842252	0.232451
ENSMUSG00000047216	Cdh19	2.54291	0.0336331	1	0.0278802	0.0130862	0	0	0.0259582	0.0131451	0.159283	0.0412127
ENSMUSG00000055214	Pld5	2.37946	0.0410452	1	0	0.0243034	0	0.0140256	0.0241045	0.0366192	0.0369772	0.102052
ENSMUSG00000034634	Ly6d	2.32502	2.09316e-07	1	0.366677	0.481903	0.658716	0.0794595	1.3656	2.55867	1.60607	2.38491
ENSMUSG00000091619	Gm3625	2.22463	0.0121558	1	2.67458	0	0.533861	0	2.49021	2.52206	7.1308	2.63572
ENSMUSG00000033595	Lgi3	2.22131	0.000193859	1	0.103141	0.0322743	0	0.0745026	0.240077	0.243148	0.278261	0.186344
ENSMUSG00000030483	Cyp2b10	2.20695	0.0198391	1	0	0	0.0284206	0.123419	0.079541	0.18797	0.108461	0.28063
ENSMUSG00000079168	Cd209g	2.10211	0.00171054	1	0.0638333	0.0898848	0.0159268	0.017291	0.0445746	0.361158	0.19754	0.204444
ENSMUSG00000041052	Slc7a13	2.04501	0.0446992	1	0.0254841	0.0239231	0.0254338	0.0276123	0.118637	0.120154	0.0485315	0.125569
ENSMUSG00000021565	Slc6a19	1.95532	0.0468752	1	0.0130156	0.0122184	0.0259799	0.0141025	0.0242367	0.0859137	0.123934	0.0128265
ENSMUSG00000039092	Sptlc3	1.90151	0.026354	1	0.0395516	0.0371289	0.0394736	0	0.110475	0.130536	0.0941518	0.0974425
ENSMUSG00000015396	Cd83	1.8434	0.0296632	1	0	0.041356	0.0219838	0.0954668	0.102544	0.0830844	0.272664	0.0868289
ENSMUSG00000047363	Cstad	1.83343	0.0331398	1	0.133239	0.125078	0.0664882	0.0721829	0.310136	0.251282	0.507477	0.328259
ENSMUSG00000059336	Slc14a1	1.83105	0.0458021	1	0	0.0139753	0.0445734	0.0322608	0.0138609	0.126344	0.099228	0.0733544
ENSMUSG00000074639	Rdh16f2	1.77005	0.0319567	1	0	0.0404896	0.172186	0.1402	0.120475	0.20336	0.205348	0.637574
ENSMUSG00000042671	Rgs8	1.74556	0.0284001	1	0.0193161	0.0302215	0.00642599	0	0.0479587	0.0910727	0.0367852	0.0126903
ENSMUSG00000096003	Gm3500	1.69622	0.0178839	1	0.0558174	0.0523983	0.0835609	0.0604786	0.207878	0.210537	0.132872	0.247529
ENSMUSG00000041608	Entpd3	1.67892	0.015222	1	0.0158012	0.0444999	0.04731	0.0513621	0.0882714	0.178801	0.135412	0.0934297
ENSMUSG00000021211	Akr1c12	1.65632	2.82916e-11	5.79506e-08	1.38459	1.3404	0.518197	1.31269	3.18257	4.52891	3.37838	2.98479
ENSMUSG00000019102	Aldh3a1	1.62811	1.49955e-06	0.000694903	1.8934	1.77742	0.881844	1.2651	5.40615	5.62409	3.42547	3.20311
ENSMUSG00000009185	Ccl8	1.61837	3.37866e-05	0.0070779	1.70838	1.8042	0.426253	1.2726	1.59061	4.0274	4.57511	5.68202
ENSMUSG00000100642	Gm28230	1.59627	0.00267202	1	0.0309393	0.0726104	0.0926349	0.0838075	0.288065	0.204225	0.191491	0.137204
ENSMUSG00000036813	Entpd8	1.587	0.0475866	1	0.0474242	0	0.0473306	0.102769	0.132465	0.201239	0.158049	0.0701027
ENSMUSG00000026870	Cutal	1.58617	0.0137682	1	0.0239515	0.134906	0.0478085	0.0778549	0.223004	0.225856	0.182451	0.212431
ENSMUSG00000021613	Hapln1	1.47381	0.0256937	1	0.0190941	0.0358491	0.0476412	0.0206887	0.160001	0.0540158	0.072725	0.0470418
ENSMUSG00000066760	Psg16	1.46527	0.000293007	1	0.0740486	0.0810983	0.0985367	0.160465	0.218323	0.209478	0.352542	0.328377
ENSMUSG00000087408	Cers1	1.44644	0.047196	1	0.0200005	0.0751017	0.0399222	0.0650123	0.148974	0.13202	0.057133	0.1971
ENSMUSG00000050368	Hoxd10	1.41466	3.15358e-06	0.00118645	0.330494	0.338454	0.47977	0.716185	1.31476	1.33158	1.14434	1.00668
ENSMUSG00000034266	Batf	1.40882	0.00172504	1	0.514192	0.107266	0.513178	0.433324	0.957491	0.86199	1.19682	1.01344
ENSMUSG00000024365	Cyp21a1	1.40876	3.12699e-07	0.000185955	0.477214	0.373319	0.502732	0.603243	1.08611	1.275	1.5904	1.09732
ENSMUSG00000090690	Gm8020	1.33804	0.0330476	1	0.116419	0.291433	0	0.168187	0.36131	0.365932	0.258656	0.458908
ENSMUSG00000026185	Igfbp5	1.3181	1.25843e-05	0.00361923	0.118098	0.238785	0.145065	0.108274	0.346788	0.471154	0.320056	0.367053
ENSMUSG00000039457	Ppl	1.30995	0.00729703	1	0.0434614	0.0489591	0.0260254	0.0847635	0.0971169	0.155735	0.115874	0.119924
ENSMUSG00000021091	Serpina3n	1.30578	3.72556e-08	3.43404e-05	0.87235	0.794099	0.527654	1.00248	1.50136	1.6452	2.06402	2.52692
ENSMUSG00000051906	Cd209f	1.2981	0.000310073	1	0.425984	0.333242	0.283429	0.423094	0.85934	0.836858	0.980244	0.83959
ENSMUSG00000029830	Svopl	1.27997	3.44786e-05	0.00714172	0.187497	0.234682	0.249502	0.237013	0.480071	0.545146	0.669497	0.461931
ENSMUSG00000091657	Gm3072	1.27965	0.015488	1	0.156449	0.183582	0.195175	0.25427	0.364159	0.479463	0.297938	0.732335
ENSMUSG00000070526	Peg12	1.27809	0.0175369	1	0.165338	0.174611	0.0206265	0.0895725	0.15394	0.389773	0.216471	0.325871
ENSMUSG00000040127	Sdr9c7	1.21416	0.0159924	1	0.190242	0.142871	0	0.14429	0.247979	0.287029	0.253606	0.299965
ENSMUSG00000018774	Cd68	1.18946	2.01402e-07	0.000133051	1.41949	1.37418	1.15106	1.24965	2.80847	3.63915	2.53429	2.62287
ENSMUSG00000060459	Kng2	1.17139	0.0159619	1	0.142707	0.0893101	0.237375	0.128853	0.287883	0.403706	0.407652	0.21095
ENSMUSG00000022901	Cd86	1.17067	0.0115003	1	0.236383	0.20173	0.128682	0.0465678	0.400159	0.263431	0.409239	0.29648
ENSMUSG00000020120	Plek	1.15405	0.000432742	0.0389151	0.332611	0.187342	0.119504	0.172986	0.421167	0.426555	0.367382	0.563779
ENSMUSG00000073125	Xlr3b	1.13129	0.00204373	1	0.129908	0.189701	0.129652	0.172036	0.241906	0.3675	0.384837	0.341389
ENSMUSG00000027863	Cd2	1.12443	0.0255007	1	0.283928	0.444227	0.425052	0.0512731	0.660887	0.937078	0.450589	0.559606
ENSMUSG00000053063	Clec12a	1.1062	0.0185535	1	0.135011	0.0316853	0.151588	0.201143	0.267121	0.381936	0.257113	0.166312
ENSMUSG00000032131	Abcg4	1.10557	0.0147434	1	0.10915	0.0768483	0.108935	0.0886989	0.228658	0.18012	0.142906	0.255466
ENSMUSG00000030247	Kcnj8	1.10479	0.00224979	1	0.107067	0.361832	0.341939	0.232017	0.637993	0.525	0.468963	0.569763
ENSMUSG00000018012	Rac3	1.09414	0.0140953	1	0.354954	0.238008	0.354254	0.549422	0.660969	0.95632	0.675968	0.799536
ENSMUSG00000022504	Ciita	1.08526	0.0473582	1	0.0623085	0.0779891	0.0207285	0.0562598	0.0773509	0.186058	0.0988826	0.0921049
ENSMUSG00000059003	Grin2a	1.07963	0.0436854	1	0.0223704	0.0140001	0.0148842	0.0323181	0.0416566	0.0210947	0.0390517	0.0698105
ENSMUSG00000047281	Sfn	1.07649	0.0449473	1	0.439739	0.127016	0.236316	0.146603	0.850345	0.446559	0.515342	0.133339
ENSMUSG00000036526	Card11	1.07345	0.0137857	1	0.18599	0.162126	0.0397764	0.0863664	0.333968	0.200438	0.215047	0.235656
ENSMUSG00000019194	Scn1b	1.05958	0.0432997	1	0.138745	0.260493	0.242325	0.112749	0.516722	0.327082	0.429363	0.273458
ENSMUSG00000097425	Vmn1r181	1.05404	1.30744e-06	0.000674858	1.00134	0.459072	0.708853	0.567713	1.40931	1.88848	1.13086	1.12449
ENSMUSG00000061816	Myl1	1.04734	0.0210632	1	0.352986	0.568052	0.150981	0.491738	0.939006	0.760814	0.528172	0.944184
ENSMUSG00000021933	Gucy1b2	1.0288	0.02371	1	0.20126	0.113359	0.140604	0.13084	0.374771	0.246717	0.325784	0.218169
ENSMUSG00000031574	Star	1.01954	2.37603e-22	2.1901e-18	7.95632	8.87414	6.55438	9.16136	14.8408	18.8837	16.2818	14.5784
ENSMUSG00000050963	Kcns2	1.01538	0.0365394	1	0.0900025	0.0563263	0.0698638	0.0433415	0.121042	0.0848699	0.123788	0.187245
ENSMUSG00000069324	Gm5096	1.01479	1.8397e-15	6.78298e-12	4.08183	3.88694	2.98939	3.43634	6.78065	7.61505	7.15821	6.97431
ENSMUSG00000096036	Gm21778	1.00363	0.0139987	1	0.294529	0.552976	0.551152	0.119672	0.754119	0.763766	0.560895	0.943312
ENSMUSG00000044349	Snhg11	1.00343	7.5035e-19	3.45818e-15	2.05629	1.72944	1.53221	1.67353	3.36127	3.78154	3.36666	3.21842
ENSMUSG00000056529	Ptafr	1.00239	0.0273072	1	0.0450054	0.09858	0.13475	0.1788	0.195547	0.268779	0.199984	0.221757
ENSMUSG00000074968	Ano3	0.987861	0.00161187	0.0856049	0.170886	0.145141	0.0812138	0.132255	0.212141	0.306935	0.263445	0.248595
ENSMUSG00000015340	Cybb	0.984738	0.000492231	0.0417721	0.195191	0.269462	0.206265	0.373219	0.448992	0.69293	0.38265	0.486544
ENSMUSG00000066108	Muc5b	0.983835	0.0292144	1	0.0218771	0.0308056	0.0400289	0.0197534	0.0509224	0.0790798	0.0486061	0.0395253
ENSMUSG00000001663	Gstt1	0.979515	0.000200393	0.0234859	1.33318	2.08586	0.887031	1.12351	2.62046	3.21272	2.35081	2.38432
ENSMUSG00000074768	Bhmt	0.978488	3.4653e-24	6.38828e-20	16.3698	17.3962	13.8505	15.0517	30.3417	34.7544	29.9028	25.9686
ENSMUSG00000031980	Agt	0.958628	1.32163e-06	0.000674858	112.124	114.682	80.1402	82.5649	183.133	227.648	175.53	157.07
ENSMUSG00000067813	Xkr9	0.956297	0.00806884	1	0.396605	0.319124	0.28273	0.306946	0.501144	0.721262	0.647389	0.614181
ENSMUSG00000072605	Gm10376	0.937787	0.000637594	0.0497499	1.81872	1.59349	0.907564	1.90491	2.25779	4.00167	2.36675	3.0469
ENSMUSG00000040170	Fmo2	0.935918	0.000118921	0.017261	0.429407	0.516477	0.294635	0.33441	0.73714	0.632686	0.715535	0.886008
ENSMUSG00000048779	P2ry6	0.923277	0.00458184	1	0.50468	0.342164	0.503684	0.36455	0.991988	0.581655	0.774222	0.828912
ENSMUSG00000090740	Gm17079	0.922189	0.0359054	1	0.491545	1.15359	0.6541	0.621359	0.991596	1.15878	2.18421	1.13027
ENSMUSG00000040522	Tlr8	0.916365	0.0201337	1	0.206733	0.119427	0.126969	0.206766	0.222094	0.389887	0.257418	0.344772
ENSMUSG00000049265	Kcnk3	0.91602	0.000196937	0.0234227	0.572674	0.416636	0.442947	0.372298	0.933092	0.850525	0.995163	0.550245
ENSMUSG00000066513	Klk1b4	0.905228	0.0448919	1	0.455221	0.488385	0.38942	0.704623	0.847679	1.34911	0.681147	0.833128
ENSMUSG00000022952	Runx1	0.887986	0.00269165	0.11403	0.24204	0.0961292	0.21369	0.171473	0.338032	0.333578	0.310246	0.32109
ENSMUSG00000044726	Erich5	0.88781	0.0205256	1	0.320546	0.193443	0.205659	0.297698	0.38372	0.431809	0.370625	0.654341
ENSMUSG00000027966	Col11a1	0.883813	0.000302707	0.0305966	0.220609	0.180373	0.234378	0.254453	0.39755	0.34895	0.54887	0.30156
ENSMUSG00000094954	Gm8011	0.878	0.0373354	1	0.342762	0.321766	0.217691	0.303861	0.725303	0.440748	0.65275	0.307075
ENSMUSG00000037482	Erv3	0.874682	0.0271374	1	0.209976	0.197114	0.177322	0.157508	0.31581	0.533082	0.307596	0.175091
ENSMUSG00000064267	Hvcn1	0.871614	0.0024155	0.11014	0.466836	0.620841	0.330023	0.400442	0.90553	0.843744	1.00016	0.51756
ENSMUSG00000069792	Wfdc17	0.865245	0.00422011	0.14145	1.5355	2.01802	2.14546	1.55281	2.57337	3.95769	3.50902	2.92551
ENSMUSG00000068428	Gmnc	0.864406	0.0382689	1	0.120268	0.13799	0.146704	0.14479	0.174186	0.428435	0.165415	0.210703
ENSMUSG00000050896	Rtn4rl2	0.855632	0.00575707	0.163156	0.711854	0.943411	0.752241	0.499076	1.13063	1.1056	1.63474	1.32049
ENSMUSG00000027322	Siglec1	0.853941	0.000676853	0.0509243	0.213565	0.176425	0.221669	0.296191	0.36587	0.483326	0.374172	0.370413
ENSMUSG00000023274	Cd4	0.849162	0.0361579	1	0.315993	0.280157	0.0876027	0.190212	0.45766	0.562838	0.234022	0.294102
ENSMUSG00000023992	Trem2	0.84844	0.0359297	1	0.102645	0.11777	0.102442	0.185361	0.159282	0.333393	0.260633	0.134872
ENSMUSG00000003949	Hlf	0.840858	0.000170046	0.0208154	0.338471	0.25419	0.3185	0.450561	0.666291	0.51067	0.58012	0.609926
ENSMUSG00000015879	Fam184b	0.822497	0.00265274	0.11403	0.110766	0.329274	0.221095	0.310041	0.421115	0.452614	0.386725	0.418434
ENSMUSG00000042268	Slc26a9	0.813364	0.0409552	1	0.0805931	0.0864644	0.137887	0.212071	0.225112	0.260561	0.241183	0.147498
ENSMUSG00000039004	Bmp6	0.811918	5.50911e-05	0.0102586	0.592234	0.598723	0.772933	0.658145	1.07454	1.34603	1.11338	0.957752
ENSMUSG00000022587	Ly6e	0.805078	0.000170498	0.0208154	11.1706	11.6091	7.5438	8.86379	16.436	20.9319	16.8545	12.9884
ENSMUSG00000110170	St6galnac2	0.800162	0.000160375	0.0204259	93.5618	81.9875	59.113	69.8314	163.659	118.491	116.47	120.828
ENSMUSG00000060780	Lrrtm1	0.798564	0.0393485	1	0.276681	0.15584	0.220908	0.1399	0.291955	0.365264	0.316144	0.381726
ENSMUSG00000029838	Ptn	0.779986	0.017873	1	0.319946	0.50058	0.319315	0.277332	0.456765	0.563175	0.52806	0.861814
ENSMUSG00000024164	C3	0.775816	3.64658e-05	0.00742465	0.956101	1.1668	0.858793	1.66902	1.34518	1.73303	2.27598	2.42881
ENSMUSG00000038418	Egr1	0.774915	4.57088e-05	0.00885975	0.863931	0.845279	0.983667	0.500999	1.25754	1.11299	1.36718	1.6428
ENSMUSG00000041607	Mbp	0.774272	1.77558e-05	0.00481885	0.659697	0.65132	0.499473	0.813379	1.13313	0.965291	1.12635	1.15451
ENSMUSG00000079227	Ccr5	0.768548	0.0415473	1	0.0928481	0.0622576	0.0463324	0.143717	0.123496	0.112568	0.170503	0.163391
ENSMUSG00000038370	Pcp4l1	0.768148	0.000885364	0.0589805	1.21094	1.07181	1.24308	1.34955	1.80394	2.77315	1.61426	1.90935
ENSMUSG00000032446	Eomes	0.764274	0.0297399	1	0.352504	0.302137	0.15296	0.149455	0.313934	0.31795	0.510773	0.468211
ENSMUSG00000034639	Setmar	0.76285	0.0401938	1	0.59306	0.644637	0.529586	0.101461	0.726548	0.971311	0.802477	0.645964
ENSMUSG00000024672	Ms4a7	0.758971	0.0400904	1	0.151266	0.1846	0.120774	0.426134	0.323927	0.370862	0.316874	0.432297
ENSMUSG00000016552	Foxred2	0.758931	0.00338712	0.125772	0.330124	0.37402	0.193139	0.481034	0.572337	0.665533	0.585324	0.448727
ENSMUSG00000044197	Gpr146	0.750255	0.00464225	0.147806	0.37108	0.204205	0.370348	0.374339	0.428895	0.555042	0.511732	0.668327
ENSMUSG00000032313	Tmem266	0.747373	0.0443957	1	0.148231	0.104364	0.197252	0.147226	0.21852	0.232964	0.317575	0.206943
ENSMUSG00000030730	Atp2a1	0.743908	0.0241015	1	0.266766	0.250425	0.234917	0.221033	0.306818	0.532701	0.418373	0.340211
ENSMUSG00000027684	Mecom	0.743067	0.0342075	1	0.105442	0.17997	0.0956673	0.218109	0.196347	0.253092	0.182547	0.349516
ENSMUSG00000021390	Ogn	0.734046	2.54354e-07	0.00016169	3.84865	3.69274	3.41663	3.04114	5.10774	7.05784	6.23597	4.42136
ENSMUSG00000112023	Lilr4b	0.733053	0.017812	0.29335	0.381549	0.191881	0.190398	0.369117	0.48212	0.321241	0.570911	0.456578
ENSMUSG00000050538	B230217C12Rik	0.728619	0.0242921	1	0.350234	0.422718	0.374511	0.379482	0.605596	0.636933	0.547876	0.690291
ENSMUSG00000004105	Angptl2	0.721127	0.00196971	0.0981394	0.521239	0.546877	0.550812	0.498324	0.628044	0.751728	1.10942	0.936686
ENSMUSG00000037541	Shank2	0.719454	1.80518e-09	3.1578e-06	2.53746	2.53589	1.74485	2.21659	3.97336	3.96122	3.1907	3.45776
ENSMUSG00000051043	Gprc5c	0.714386	0.0485826	1	0.133912	0.195547	0.252445	0.177337	0.29092	0.364794	0.240851	0.322583
ENSMUSG00000093923	Gm5935	0.709322	0.014116	0.262326	1.62126	1.52195	2.42709	1.01345	1.97395	3.8808	2.31562	2.39655
ENSMUSG00000071713	Csf2rb	0.708522	0.0216556	0.321693	0.263416	0.236529	0.308618	0.397097	0.362554	0.280794	0.447118	0.835199
ENSMUSG00000027869	Hsd3b6	0.703376	0.000130457	0.0179475	36.2431	37.8603	23.9029	34.1519	48.3476	64.5267	48.1185	50.2478
ENSMUSG00000058715	Fcer1g	0.699053	0.00194518	0.0971798	3.03563	3.07466	2.63101	3.02946	4.46268	6.10169	3.65116	4.48729
ENSMUSG00000050105	Grrp1	0.698918	0.0373643	1	0.712059	0.375999	0.75507	0.964402	1.07733	0.965213	1.31366	1.05257
ENSMUSG00000037593	BC030499	0.697511	0.00886443	0.204914	0.549572	0.660362	0.570427	0.452554	0.716361	0.82917	1.17219	0.844876
ENSMUSG00000053228	Ceacam3	0.683703	0.0168176	0.285959	0.250973	0.408373	0.400764	0.326317	0.57639	0.552208	0.557606	0.494653
ENSMUSG00000021185	Dglucy	0.681055	0.00166312	0.0873492	0.529884	0.559605	0.793258	0.574134	0.971294	0.968104	0.914498	0.995416
ENSMUSG00000078954	Arhgap8	0.679674	0.0204133	0.311523	0.55766	0.774782	0.422986	0.58006	0.706135	0.694134	1.44432	0.835328
ENSMUSG00000034799	Unc13a	0.664905	0.0249304	0.343845	0.127691	0.0899023	0.0796497	0.13259	0.188241	0.17058	0.131719	0.173025
ENSMUSG00000030935	Acsm3	0.663625	0.00760489	0.190225	0.761708	0.450793	0.429681	0.502367	0.863372	1.01495	0.693757	0.750641
ENSMUSG00000045693	Nlrp4e	0.662315	0.0132583	0.254072	0.548519	0.408907	0.708448	0.297162	0.856183	0.669368	0.583741	0.938012
ENSMUSG00000024899	Papss2	0.652028	9.64864e-05	0.015097	0.930623	0.901799	1.24338	1.12218	1.38355	1.74095	1.80084	1.50878
ENSMUSG00000003410	Elavl3	0.647617	0.00289478	0.117767	0.805255	0.58227	0.325811	0.530575	0.820666	0.851686	0.828926	0.954412
ENSMUSG00000001986	Gria3	0.641248	0.000189578	0.022694	0.565947	0.580473	0.62759	0.692698	0.907495	0.938869	0.948046	0.960525
ENSMUSG00000035172	Plekhh3	0.626076	0.0179757	0.2943	0.446347	0.486048	0.374192	0.483621	0.648301	0.606087	0.833015	0.615807
ENSMUSG00000020123	Avpr1a	0.623576	0.0421127	1	0.429135	0.345299	0.305921	0.487113	0.532736	0.674439	0.700489	0.443039
ENSMUSG00000030921	Trim30a	0.62145	0.00929253	0.210194	0.347249	0.44822	0.620927	0.454632	0.579265	0.764042	0.702625	0.769959
ENSMUSG00000022519	Srl	0.620173	2.22682e-09	3.1578e-06	2.38979	2.19219	2.37419	2.22283	3.34265	3.78672	3.14835	3.52723
ENSMUSG00000031543	Ank1	0.614588	0.00795457	0.195166	0.313047	0.238771	0.195268	0.31799	0.503994	0.289045	0.391231	0.404905
ENSMUSG00000091955	Gm9844	0.613872	0.0044757	0.145337	4.61242	6.0196	5.50152	4.02245	9.11262	8.27444	6.96277	5.87576
ENSMUSG00000057897	Camk2b	0.612345	0.00227804	0.107681	0.502627	0.509089	0.778855	0.71658	1.02216	0.91051	0.906815	0.88637
ENSMUSG00000021573	Tppp	0.605255	0.011792	0.239149	0.321581	0.322008	0.288851	0.394893	0.399216	0.576159	0.469516	0.52818
ENSMUSG00000041423	Paqr6	0.5986	0.00165859	0.0873492	1.79694	2.02424	1.69557	1.4514	2.22061	2.46467	2.64431	3.0587
ENSMUSG00000022485	Hoxc5	0.59797	0.0247165	0.342832	0.391992	0.49064	0.484365	0.444951	0.556143	0.651266	0.746501	0.735803
ENSMUSG00000034295	Fhod3	0.59663	0.0287267	0.368017	0.252226	0.265189	0.201383	0.34981	0.403922	0.390061	0.499547	0.278389
ENSMUSG00000094543	Gm8212	0.595993	0.00705877	0.179984	1.28243	1.64165	1.31868	1.43163	2.02622	2.08878	1.85018	2.451
ENSMUSG00000038421	Fcrla	0.594156	0.00327345	0.123407	1.7873	1.70833	1.16756	1.47883	2.23896	2.54339	2.07317	2.2417
ENSMUSG00000027953	Slc50a1	0.593672	0.0250455	0.344048	0.860204	1.80729	1.55349	0.976421	1.48739	2.27894	2.26222	1.69541
ENSMUSG00000027401	Tgm3	0.59317	0.00564744	0.162076	0.567387	0.520245	0.408239	0.557581	0.737125	0.721669	0.741287	0.832213
ENSMUSG00000055633	Zfp580	0.589673	0.00684615	0.178513	1.89173	2.43012	2.03705	1.83395	3.05914	2.58189	2.60713	3.87567
ENSMUSG00000037010	Apln	0.588478	0.000121545	0.017261	1.90593	1.90304	2.02321	1.85858	2.11331	3.137	3.51412	2.56123
ENSMUSG00000049580	Tsku	0.587217	0.000541238	0.0443455	2.15478	2.50529	1.42054	2.05627	2.70566	3.39272	3.40706	2.49362
ENSMUSG00000002289	Angptl4	-0.586968	0.00309622	0.119613	1.51907	1.07371	1.56958	1.25865	0.965088	0.859467	0.714715	0.98626
ENSMUSG00000063975	Slco1a5	-0.588647	0.0184883	0.298975	1.18153	0.792256	1.26343	1.00587	0.412531	0.696346	0.863873	0.790106
ENSMUSG00000031825	Crispld2	-0.594204	3.665e-05	0.00742465	1.93092	1.64118	2.09638	2.36076	1.31191	1.40251	1.30441	1.15715
ENSMUSG00000032323	Cyp11a1	-0.599549	6.57396e-08	5.50868e-05	24.4329	28.9235	30.845	20.6285	15.0081	19.9128	15.4242	17.4799
ENSMUSG00000046295	Ankle1	-0.600228	0.0415704	0.430589	0.656549	0.786355	0.700444	0.760437	0.526973	0.640457	0.366473	0.33466
ENSMUSG00000027330	Cdc25b	-0.603203	0.0072771	0.184024	1.0068	0.779317	1.0577	1.33967	0.756494	0.549644	0.605473	0.765887
ENSMUSG00000050197	Rhox13	-0.604645	0.0169384	0.286487	2.17997	2.57266	3.04593	2.63196	1.73973	1.99692	1.36406	1.59588
ENSMUSG00000012483	Rpa3	-0.606508	0.00587249	0.165282	4.56013	3.98039	5.98833	4.24747	2.83051	2.56496	3.3518	3.31127
ENSMUSG00000069305	Hist1h4n	-0.608075	0.0299599	0.373304	20.1751	28.5876	35.8382	23.3722	10.8689	19.2638	23.3184	15.8805
ENSMUSG00000055471	Alk	-0.60904	0.00781815	0.193481	0.616704	0.494721	0.548343	0.643906	0.375834	0.370068	0.416392	0.309397
ENSMUSG00000039954	Stk32a	-0.619488	0.0177024	0.292846	0.681113	0.516955	0.997959	0.832203	0.485739	0.696933	0.317375	0.414155
ENSMUSG00000021614	Vcan	-0.620594	0.000723166	0.052466	0.333683	0.325608	0.363698	0.366305	0.23301	0.207009	0.229936	0.212012
ENSMUSG00000029189	Sel1l3	-0.624337	0.0129202	0.24999	0.628812	0.522183	0.470678	0.49789	0.382803	0.342088	0.356946	0.26217
ENSMUSG00000021636	Marveld2	-0.625072	0.0403332	1	0.438456	0.559774	0.490102	0.456068	0.261268	0.330762	0.317295	0.328385
ENSMUSG00000032492	Pth1r	-0.630382	0.0369646	0.409912	0.875065	0.510639	0.826131	0.717512	0.484441	0.579844	0.427874	0.349602
ENSMUSG00000058351	Smim4	-0.636166	0.0333852	0.394524	1.4323	1.51263	1.34013	1.11543	1.00017	0.801928	0.63929	0.970396
ENSMUSG00000050382	Kif7	-0.637161	0.00983318	0.217356	0.464911	0.74977	0.820912	0.503735	0.321872	0.460881	0.351877	0.469904
ENSMUSG00000068373	D430041D05Rik	-0.638005	0.0335355	0.395538	0.162521	0.205011	0.146994	0.247631	0.0851162	0.196356	0.106392	0.0900901
ENSMUSG00000028600	Podn	-0.640913	0.0497564	1	0.435171	0.366255	0.374408	0.325181	0.209572	0.268853	0.171462	0.295758
ENSMUSG00000048376	F2r	-0.64119	0.0010144	0.0637593	1.14488	1.13616	1.68128	1.34681	0.913673	0.801979	0.669657	0.934829
ENSMUSG00000031502	Col4a1	-0.643225	2.01777e-08	2.06653e-05	3.20853	3.53077	4.98852	4.7187	2.62641	2.57445	2.5839	2.46288
ENSMUSG00000075602	Ly6a	-0.645706	0.0162028	0.281328	2.1139	2.09168	1.99569	3.71421	1.43624	1.29298	1.52323	1.91428
ENSMUSG00000032372	Plscr2	-0.648507	0.0368218	0.408922	0.976364	0.754812	0.859798	0.87121	0.320843	0.812369	0.519529	0.509388
ENSMUSG00000057604	Lmcd1	-0.651465	0.0290902	0.370102	1.29308	0.799377	1.03872	0.820132	0.499193	0.713758	0.600612	0.652685
ENSMUSG00000067206	Lrrc66	-0.653798	0.00771925	0.192303	0.870118	0.688691	0.681099	0.85035	0.41301	0.434381	0.5361	0.538024
ENSMUSG00000002020	Ltbp2	-0.660142	3.36737e-07	0.000193992	1.50731	1.62685	1.83417	1.52838	1.04317	1.14012	0.91334	0.921433
ENSMUSG00000035364	4930524J08Rik	-0.667724	0.00811055	0.197365	3.89079	4.07716	5.41829	3.52942	2.10614	3.49826	2.32625	2.49673
ENSMUSG00000020846	Rflnb	-0.670394	0.020977	0.315796	0.543751	0.350018	0.728739	0.605991	0.376084	0.395544	0.251481	0.33682
ENSMUSG00000034127	Tspan8	-0.677334	0.00420065	0.141156	1.93593	1.66899	2.72072	2.26882	1.25069	0.968646	1.58003	1.44058
ENSMUSG00000030546	Plin1	-0.678447	0.0279439	0.362014	0.639166	0.509103	0.599244	0.608597	0.396736	0.511395	0.221312	0.305396
ENSMUSG00000079343	C1s2	-0.683284	0.0421706	1	0.491914	0.557987	0.327296	0.710658	0.286252	0.328569	0.370814	0.282781
ENSMUSG00000019577	Pdk4	-0.684671	0.00504408	0.154465	0.626424	0.661559	1.0003	0.916292	0.481173	0.369188	0.596475	0.493858
ENSMUSG00000054013	Tmem179	-0.692585	0.00736559	0.185498	1.26087	0.88235	0.892311	0.894219	0.55496	0.518824	0.589382	0.722941
ENSMUSG00000028369	Svep1	-0.696813	9.38897e-05	0.0149212	0.699085	0.647454	0.856914	1.27091	0.515472	0.40261	0.522701	0.642691
ENSMUSG00000028583	Pdpn	-0.697389	0.00213724	0.103141	1.62153	1.88866	1.97796	1.56173	1.28608	1.16095	1.05793	0.739801
ENSMUSG00000023073	Slc10a2	-0.697469	0.0349279	1	0.381089	0.320738	0.249187	0.398675	0.171292	0.247832	0.237742	0.155401
ENSMUSG00000074743	Thbd	-0.698469	2.78799e-06	0.00111732	2.21294	1.87103	2.01843	2.1278	0.996083	1.29903	1.24196	1.42979
ENSMUSG00000026433	Rab29	-0.701541	0.0499345	1	0.890073	1.00266	1.51014	0.675081	0.455793	0.755384	0.593264	0.657856
ENSMUSG00000022096	Hr	-0.70916	0.00105328	0.0651587	0.622782	0.621173	0.563282	0.801312	0.298985	0.422098	0.500349	0.335635
ENSMUSG00000030148	Clec4a2	-0.723119	0.00299653	0.118289	1.56141	1.40384	2.74354	1.11993	0.737125	1.18204	1.00514	1.12696
ENSMUSG00000001025	S100a6	-0.727228	0.00541932	0.159338	2.29953	3.6632	3.26862	3.69958	1.42734	2.43123	1.45972	2.33479
ENSMUSG00000026888	Grb14	-0.744878	7.14056e-06	0.0024837	2.24332	1.72135	2.39465	2.26157	1.30769	1.26924	1.18877	1.24954
ENSMUSG00000027800	Tm4sf1	-0.748355	0.0191507	1	0.323615	0.546826	0.532911	0.561023	0.346502	0.22887	0.184886	0.382696
ENSMUSG00000094493	Olfr700	-0.753914	0.0463769	1	0.652563	0.646623	0.687457	0.942743	0.506314	0.581163	0.241642	0.357268
ENSMUSG00000019785	Clvs2	-0.764935	0.0312377	1	0.216564	0.28701	0.279707	0.358875	0.177913	0.156164	0.206211	0.112986
ENSMUSG00000029661	Col1a2	-0.769113	3.56641e-13	9.39238e-10	4.42777	4.31936	5.89543	5.80345	2.6027	3.21322	2.89491	2.98604
ENSMUSG00000025784	Clec3b	-0.775472	0.0184883	0.298975	2.36507	1.65224	1.31743	1.43027	1.12662	0.881704	0.523719	1.35506
ENSMUSG00000079008	Gm14124	-0.779261	0.0475409	1	0.253102	0.271541	0.396947	0.352591	0.151492	0.204573	0.189358	0.17816
ENSMUSG00000031209	Heph	-0.783646	0.00295804	0.117767	0.402625	0.388762	0.551083	0.598283	0.310606	0.249494	0.240979	0.294748
ENSMUSG00000023013	Aqp2	-0.785207	0.000272293	0.0285212	2.50459	3.87039	4.03789	2.54674	1.39916	2.28909	1.61436	2.08848
ENSMUSG00000001506	Col1a1	-0.800813	5.21873e-08	4.5813e-05	1.85859	1.70155	2.87421	2.82131	1.285	1.29276	1.26159	1.32382
ENSMUSG00000062184	Hs6st2	-0.807408	0.000699057	0.0513431	0.55176	0.576821	0.750915	0.62501	0.361941	0.354746	0.358214	0.321303
ENSMUSG00000015568	Lpl	-0.820545	0.0183627	1	0.331479	0.24894	0.26466	0.416626	0.197522	0.16254	0.138878	0.195998
ENSMUSG00000042873	Lhfpl4	-0.834054	0.049783	1	0.137492	0.225873	0.194396	0.198632	0.106678	0.0432172	0.130919	0.135495
ENSMUSG00000001027	Scn4a	-0.849822	0.0152036	1	0.198466	0.194072	0.288858	0.295679	0.046196	0.163754	0.204725	0.11409
ENSMUSG00000030351	Tspan11	-0.857828	0.011095	1	0.252405	0.197453	0.461829	0.341853	0.137086	0.178508	0.120169	0.238374
ENSMUSG00000037060	Cavin3	-0.866179	0.0263153	1	0.361117	1.04781	1.01569	0.533554	0.397354	0.37148	0.468889	0.35587
ENSMUSG00000038233	Fam198a	-0.868387	0.0354996	1	0.316255	0.183785	0.255511	0.293713	0.182281	0.113608	0.0860385	0.178091
ENSMUSG00000037005	Xpnpep2	-0.870806	0.0492577	1	0.233969	0.190352	0.171239	0.35491	0.101659	0.161793	0.148522	0.0922277
ENSMUSG00000090141	Gm614	-0.873671	0.0460033	1	1.36944	1.01491	1.22287	1.01523	0.939502	0.815588	0.34315	0.355144
ENSMUSG00000034452	Slc24a1	-0.898818	0.00460381	0.147367	0.387258	0.343886	0.323819	0.272171	0.107194	0.148043	0.179389	0.268173
ENSMUSG00000026043	Col3a1	-0.911648	1.33536e-11	3.07718e-08	2.47115	2.49469	4.00281	3.02814	1.55213	1.47026	1.55934	1.63316
ENSMUSG00000042436	Mfap4	-0.91287	2.27993e-05	0.00549328	2.12697	1.64944	2.98419	2.20439	1.06193	1.19178	1.20343	1.18474
ENSMUSG00000060487	Samd5	-0.919425	0.044931	1	0.120039	0.105173	0.127788	0.10405	0.0223527	0.0528234	0.0838196	0.078863
ENSMUSG00000015337	Endog	-0.935232	0.00549413	1	1.12921	1.25278	1.33189	1.5572	0.621263	0.871214	0.537613	0.657567
ENSMUSG00000027656	Wisp2	-0.937809	0.000136413	0.018356	1.65049	1.19184	2.05905	2.13223	0.6797	0.957767	0.967129	0.969652
ENSMUSG00000019989	Enpp3	-0.941224	0.0318321	1	0.153947	0.15656	0.243269	0.291906	0.0955565	0.169363	0.0977248	0.0632128
ENSMUSG00000093927	Gm20918	-0.941567	0.0295099	1	0.622544	0.667897	1.37577	0.57817	0.372618	0.587042	0.465756	0.219107
ENSMUSG00000115091	Vmn1r22	-0.959103	0.0270115	1	0.178208	0.236998	0.2075	0.337908	0.0967887	0.168046	0.0848442	0.131714
ENSMUSG00000069302	Hist1h2ah	-0.971273	0.0323206	1	1.88608	2.65582	3.09244	1.31373	0.878028	1.14333	1.92418	0.53105
ENSMUSG00000049804	Armcx4	-0.977476	0.0183202	1	0.211532	0.108896	0.0749115	0.140475	0.0762384	0.0579102	0.0779684	0.0537957
ENSMUSG00000038968	Klk1b16	-0.982001	0.0206692	1	0.472053	0.81242	0.549642	0.895079	0.329634	0.259661	0.486942	0.271364
ENSMUSG00000060311	Mucl1	-1.00749	0.00892726	1	1.15169	2.70287	2.15517	1.40385	0.737206	1.28964	1.16517	0.42561
ENSMUSG00000043531	Sorcs1	-1.01467	0.0416815	1	0.0678157	0.106103	0.0977628	0.1143	0.0701564	0.0426323	0.0573986	0.0148512
ENSMUSG00000096218	Gm2916	-1.06881	0.0205051	1	0.480859	0.421311	0.415923	0.521015	0.149237	0.181375	0.183148	0.347507
ENSMUSG00000095445	H2al1i	-1.10712	0.0433353	1	2.05892	1.77174	2.39734	0.929526	0.958495	0.970755	0.653496	0.676337
ENSMUSG00000073245	Gm14819	-1.11974	0.0155314	1	0.940716	0.883092	1.70168	0.573341	0.383191	0.443535	0.783773	0.231762
ENSMUSG00000072763	5430403G16Rik	-1.12522	0.0228784	1	0.35928	0.199297	0.162987	0.212336	0.106436	0.153996	0.0311002	0.128749
ENSMUSG00000029675	Eln	-1.13103	3.66759e-08	3.43404e-05	0.962933	1.15652	1.39915	1.67242	0.606491	0.627602	0.606769	0.460516
ENSMUSG00000031994	Adamts8	-1.13243	0.0134168	1	0.345611	0.126955	0.329932	0.22794	0.167888	0.127527	0.0572327	0.103658
ENSMUSG00000058152	Chsy3	-1.13993	0.0215734	1	0.27923	0.279601	0.352993	0.121019	0.0866602	0.070215	0.177253	0.128414
ENSMUSG00000038077	Kcna6	-1.14027	0.00868982	1	0.261776	0.0965409	0.195944	0.192467	0.0435231	0.0617118	0.0801193	0.147413
ENSMUSG00000075066	Olfr32	-1.14138	0.014504	1	0.262567	0.197187	0.331929	0.341393	0.0651912	0.198075	0.183344	0.0517505
ENSMUSG00000095098	Ccdc85b	-1.14585	0.0127431	1	0.985511	1.17746	1.52006	1.55318	0.583911	0.675862	0.426543	0.618032
ENSMUSG00000068335	Dok1	-1.14997	0.0160014	1	0.333031	0.468946	0.24928	0.571332	0.232554	0.157019	0.211406	0.109397
ENSMUSG00000021760	Gpx8	-1.19508	0.000160996	0.0204259	2.35826	1.40878	2.13964	1.62603	0.49902	0.960266	0.765515	1.00354
ENSMUSG00000030772	Dkk3	-1.24704	0.0406353	1	0.0974603	0.121987	0.145902	0.281597	0.0151236	0.0459512	0.0928007	0.112052
ENSMUSG00000094651	Gal3st2	-1.25471	0.00585034	1	0.249402	0.432231	0.268057	0.291016	0.125036	0.162817	0.14614	0.0756242
ENSMUSG00000060882	Kcnd2	-1.31453	0.00447422	1	0.0953132	0.139183	0.264236	0.252444	0.0887426	0.0898778	0.0403361	0.0730554
ENSMUSG00000024529	Lox	-1.32794	0.000817728	1	0.207597	0.217808	0.390001	0.357247	0.159177	0.138183	0.0581389	0.0962735
ENSMUSG00000050840	Cdh20	-1.35474	0.000592702	1	0.31279	0.229798	0.380037	0.265235	0.0886345	0.115416	0.116544	0.13402
ENSMUSG00000069830	Nlrp1a	-1.41738	0.0404561	1	0.153773	0.104985	0.069759	0.106027	0.0390471	0.079093	0	0.0413288
ENSMUSG00000095028	Sirpb1b	-1.42051	0.00232542	1	0.477278	0.631332	0.411381	0.211555	0.0403978	0.265944	0.165258	0.171034
ENSMUSG00000084063	Gm5934	-1.496	0.0248707	1	0.147577	0.237493	0.189368	0.114215	0.0196291	0.0994011	0.0802982	0.0415524
ENSMUSG00000037759	Ptger2	-1.50151	0.0314506	1	0.148104	0.069516	0.0591247	0.176519	0.0275788	0.0279316	0.042307	0.0583809
ENSMUSG00000044338	Aplnr	-1.51483	0.0170718	1	0.162254	0.110775	0.132491	0.127857	0.0137335	0.083455	0.0280903	0.0581441
ENSMUSG00000004864	Mapk13	-1.5325	0.00793097	1	0.391965	0.625524	0.273834	0.467167	0.109483	0.184806	0.074645	0.231762
ENSMUSG00000032092	Mpzl2	-1.59696	0.0124159	1	0.152662	0.0716555	0.167597	0.198493	0.0142138	0.0719782	0.0290727	0.0752221
ENSMUSG00000063713	Klk1b24	-1.65677	2.43841e-05	0.00566404	8.70001	9.10048	18.7922	8.34922	3.99227	5.03952	2.54439	2.26588
ENSMUSG00000030268	Bcat1	-1.66347	0.00739028	1	0.125381	0.0523114	0.0625667	0.0603782	0.0389125	0.0131367	0.00663257	0.034322
ENSMUSG00000090639	Gm20425	-1.69615	0.0336342	1	0.072076	0.118407	0.0719338	0.195237	0.0503305	0.0509743	0.034315	0
ENSMUSG00000020884	Asgr1	-1.81242	0.0132807	1	0.250282	0.469902	0.249788	0.451971	0.0388381	0.275344	0	0.0822152
ENSMUSG00000040666	Sh3bgr	-1.86245	0.00560228	1	0.289122	0.387732	0.659547	0.268514	0.0769118	0.233687	0.078657	0.0407031
ENSMUSG00000040498	Igsf23	-2.05137	0.0305736	1	0.171577	0.0536891	0.171239	0.185905	0.0266249	0.0269654	0.081687	0
ENSMUSG00000063177	Klk1b27	-2.22164	6.37944e-05	0.0115299	5.15542	6.74091	14.9457	4.98744	1.94287	2.83583	1.11036	0.725788
ENSMUSG00000093948	Gm10378	-2.23118	0.0268896	1	0.352294	0.496071	0.0439498	0.0954283	0.123003	0	0	0.0867938
ENSMUSG00000066516	Klk1b21	-2.37646	4.03442e-09	4.9583e-06	10.5866	12.8195	28.7586	13.7105	3.38279	4.43025	2.2666	2.22236
ENSMUSG00000047678	Gpr82	-2.74879	0.00403111	1	0.174807	0.0410247	0.196269	0.165729	0.0203445	0.0206047	0.0208061	0.0215333
ENSMUSG00000060177	Klk1b22	-3.15684	0.000289758	0.0299054	1.85062	2.27642	6.62363	1.52116	0.65357	0.421228	0	0.25155
ENSMUSG00000027761	Aadac	-3.20034	0.0301712	1	0.0824192	0.154741	0.205641	0	0	0.0388595	0	0
ENSMUSG00000063844	Olfr1276	-3.59602	0.00913045	1	0.0323999	0.0202769	0.0107787	0.0936149	0	0	0.0102836	0

## Sheet: Ed
Gene ID	Gene name	log2FC	Pvalue	FDR	3M-Ed1	3M-Ed2	3M-Ed3	3M-Ed4	21M-Ed1	21M-Ed2	21M-Ed3	21M-Ed4
ENSMUSG00000029272	Sult1e1	-0.585604	0.0451812	0.152599	10.1283	9.90136	7.67473	16.1477	7.38858	5.0884	4.59468	5.42786
ENSMUSG00000035580	Kcnh8	-0.585979	0.0028387	0.0213319	5.58155	5.41324	5.56614	6.65275	3.52684	3.93114	2.1414	2.4741
ENSMUSG00000028232	Tmem68	-0.586651	0.00178028	0.0152016	4.33914	3.93403	5.07541	5.47125	2.805	2.80852	2.30397	1.81521
ENSMUSG00000073792	Alg6	-0.587385	0.00240589	0.0190465	5.4388	4.13746	5.96457	5.74107	2.28067	3.4611	2.04298	3.25655
ENSMUSG00000027770	Dhx36	-0.58998	0.00918716	0.0509972	8.24772	6.51744	8.07065	8.74764	5.13181	3.64617	2.86963	4.36632
ENSMUSG00000099481	Xndc1	-0.590428	0.00143374	0.0128972	2.6639	2.38616	3.18743	3.05714	1.45149	1.73302	1.56507	1.0622
ENSMUSG00000017548	Suz12	-0.593159	1.4346e-05	0.000363834	9.22386	8.92023	10.8695	11.0634	5.33611	5.70775	4.39715	5.15921
ENSMUSG00000096433	Zfp994	-0.593717	0.0356819	0.129701	1.70915	1.5716	1.92706	2.28169	1.36109	0.96801	0.584691	0.920957
ENSMUSG00000041935	AW549877	-0.593883	0.000281658	0.00381165	9.75118	8.50541	11.2924	12.1609	5.73344	5.21908	4.87573	5.43633
ENSMUSG00000039735	Fnbp1l	-0.593902	1.80785e-09	2.3052e-07	20.1362	18.7038	22.2385	21.4801	10.1476	11.6255	9.72904	10.8449
ENSMUSG00000039842	Mcph1	-0.595041	0.000237992	0.00335986	2.69827	2.70872	2.92285	2.47219	1.16228	1.94439	1.39703	1.06042
ENSMUSG00000042699	Dhx9	-0.595128	1.29256e-06	5.39036e-05	40.9515	37.5552	43.5173	47.4538	23.1744	23.1642	20.1161	20.1736
ENSMUSG00000031309	Rps6ka3	-0.596274	0.000486933	0.00587917	9.00348	9.11781	10.7123	11.5416	5.88755	6.44179	3.9474	4.47938
ENSMUSG00000030283	St8sia1	-0.597399	0.0235222	0.0984445	0.380191	0.411798	0.576336	0.369354	0.23329	0.276901	0.186271	0.199945
ENSMUSG00000109293	Dcst2	-0.599354	0.0484757	0.159901	3.91945	3.38535	5.06747	3.24862	1.14743	2.87752	2.9046	1.14078
ENSMUSG00000030759	Far1	-0.599495	7.22588e-05	0.00130866	9.87877	9.06058	10.688	12.8603	5.54813	5.46764	5.27526	5.36197
ENSMUSG00000038252	Ncapd2	-0.60305	0.00353268	0.0251502	5.78948	6.34161	7.33848	6.66763	2.39778	4.92322	4.07357	2.1748
ENSMUSG00000023345	Poc1a	-0.603696	0.0262541	0.105786	2.25254	2.34814	3.03853	2.17328	0.598349	1.9394	1.35363	1.15386
ENSMUSG00000021703	Serinc5	-0.603795	1.23147e-11	3.10735e-09	28.832	22.9174	28.3385	26.0532	12.5085	15.5249	13.8136	12.3454
ENSMUSG00000027852	Nras	-0.604441	9.62784e-10	1.34211e-07	14.0709	12.1434	14.9271	13.5037	7.01908	7.94027	6.75787	6.17334
ENSMUSG00000020130	Tbc1d15	-0.606816	7.39236e-08	5.41194e-06	9.00128	7.75342	9.5312	9.82277	4.09961	5.52953	4.52977	4.28824
ENSMUSG00000021750	Fam107a	-0.61108	5.53047e-09	6.09085e-07	22.44	21.3839	21.2668	21.8222	8.52199	14.288	11.4267	10.248
ENSMUSG00000018362	Kpna2	-0.611213	0.039238	0.138638	2.1302	1.77038	3.55061	1.9972	1.19138	1.70935	0.875762	1.05027
ENSMUSG00000089678	Agxt2	-0.612231	0.00853498	0.0483644	5.8164	5.29406	5.50089	5.74718	3.7376	2.29439	2.31406	2.90349
ENSMUSG00000097333	Zfp87	-0.61326	0.0425003	0.146347	4.32436	3.5099	4.28737	4.36388	2.63242	1.7305	1.14434	2.74123
ENSMUSG00000031512	Tex29	-0.613366	0.0286229	0.112384	5.48113	7.66453	6.30722	5.71431	1.79906	5.39462	3.22573	2.53198
ENSMUSG00000091144	Phf11c	-0.614553	0.0424226	0.146206	0.711529	0.707221	1.09119	0.86594	0.480061	0.369103	0.44831	0.415775
ENSMUSG00000017861	Mybl2	-0.616182	0.0298763	0.115418	1.59165	1.46682	2.36549	1.78348	0.430877	1.39877	1.03635	0.81244
ENSMUSG00000034349	Smc4	-0.617401	0.000545847	0.00636683	5.48069	4.35051	6.87757	5.80844	3.1994	2.85459	2.57253	2.68657
ENSMUSG00000048905	4930539E08Rik	-0.617637	0.00261887	0.0201174	1.21949	1.2225	1.22464	1.09068	0.513313	0.749872	0.647672	0.488826
ENSMUSG00000040648	Ppip5k2	-0.618238	4.39876e-05	0.000888399	9.64291	9.02876	10.1922	11.8353	5.61723	6.0777	4.1657	4.7255
ENSMUSG00000060288	Ppih	-0.618444	0.00516388	0.0332054	7.9088	7.28914	9.63573	8.84713	3.93555	4.55974	5.77902	2.6519
ENSMUSG00000040274	Cdk6	-0.618727	6.24247e-09	6.72634e-07	34.358	30.3414	33.3383	33.2157	13.1341	20.1174	19.0525	14.4753
ENSMUSG00000028076	Cd1d1	-0.618895	0.00310791	0.0228272	11.3124	13.7599	11.506	13.6855	6.60188	9.70994	5.25932	4.24946
ENSMUSG00000032423	Syncrip	-0.61903	0.000902666	0.00922283	5.99017	4.85547	6.025	7.24188	3.41262	2.79664	2.65178	3.1769
ENSMUSG00000036273	Lrrk2	-0.619677	1.48325e-10	2.76328e-08	18.6881	16.7226	19.5669	18.3974	9.35748	10.669	8.18546	8.82017
ENSMUSG00000031639	Tlr3	-0.619692	0.000719243	0.00779206	3.89378	3.51056	3.89036	5.21569	2.24093	2.28866	1.80159	2.01921
ENSMUSG00000050064	Zfp697	-0.619883	0.00421002	0.0285354	11.884	10.4433	9.73345	11.281	3.63728	8.00734	7.02409	3.68868
ENSMUSG00000069170	Adgrv1	-0.620184	0.00103332	0.0102073	0.678782	0.704303	1.07515	0.808128	0.347994	0.495162	0.359249	0.450868
ENSMUSG00000007613	Tgfbr1	-0.620373	6.24942e-07	3.02369e-05	17.234	15.5985	18.6274	20.8829	9.35304	10.0368	8.50246	8.54192
ENSMUSG00000007591	Tssk4	-0.620966	0.00958022	0.05263	5.5147	4.50966	5.31213	5.52279	1.76244	4.54351	2.35457	2.02589
ENSMUSG00000042670	Immp1l	-0.621738	0.020303	0.0889585	7.65986	6.64617	10.0482	9.68201	4.66724	5.01332	2.46813	5.08252
ENSMUSG00000075232	Amd1	-0.622392	9.51022e-05	0.00162867	9.60197	7.09855	11.361	9.67375	4.63713	5.5787	4.08487	4.71309
ENSMUSG00000027695	Pld1	-0.62356	8.07078e-08	5.78715e-06	8.24791	6.94016	7.77073	7.58711	3.78495	4.00211	3.69687	3.89275
ENSMUSG00000028188	Spata1	-0.624772	0.0108814	0.0575359	3.25192	2.9986	5.33111	3.19332	2.09468	2.04785	1.98984	1.25946
ENSMUSG00000000320	Alox12	-0.624787	4.12203e-08	3.32666e-06	61.5089	62.8329	56.0219	56.0886	22.6863	36.1831	31.2724	29.6822
ENSMUSG00000032413	Rasa2	-0.624938	7.228e-05	0.00130866	5.01912	4.71321	5.81487	6.16607	2.81624	3.60953	2.17791	2.39093
ENSMUSG00000020362	Cnot6	-0.628213	1.22255e-05	0.00032537	11.7996	10.6389	13.2832	14.0764	6.84117	6.94454	5.34203	5.79805
ENSMUSG00000027285	Haus2	-0.632151	0.00131133	0.0121243	3.4248	3.73132	3.40758	3.46839	2.16135	1.6799	1.82898	1.33945
ENSMUSG00000030068	Gm20696	-0.632241	0.00092622	0.00939128	3.61034	2.34005	3.50415	3.05455	1.42387	2.08006	1.3242	1.46442
ENSMUSG00000049164	Zfp518a	-0.635787	0.00107034	0.0104282	3.51825	2.96747	4.22747	4.22676	2.08269	1.85723	1.46002	2.01059
ENSMUSG00000029752	Asns	-0.636679	0.00670427	0.0403025	3.52682	3.50911	3.74447	3.4237	2.16757	2.27987	1.10764	1.6051
ENSMUSG00000030265	Kras	-0.637388	0.000266606	0.00366266	5.71422	5.32825	6.83767	7.15457	3.7178	3.26141	2.9171	2.53631
ENSMUSG00000033446	Lpar6	-0.637705	0.00402768	0.0276378	3.93738	3.66084	3.77916	4.24453	2.12017	1.73777	1.40138	2.46353
ENSMUSG00000026971	Itgb6	-0.638445	1.24095e-05	0.00032895	6.38709	5.72286	4.97836	6.46271	2.56406	3.73242	2.6329	2.89893
ENSMUSG00000027777	Schip1	-0.640527	0.00908686	0.0505124	2.01899	2.22288	1.97646	2.48508	1.0721	1.53718	1.04273	0.694253
ENSMUSG00000022360	Atad2	-0.640527	2.06837e-07	1.23817e-05	4.00526	4.14095	4.31066	3.99808	2.13724	2.24618	1.87699	1.96091
ENSMUSG00000030002	Dusp11	-0.640943	9.2766e-08	6.44319e-06	29.3119	26.6209	30.8483	29.9114	11.7072	19.8304	15.5769	11.6634
ENSMUSG00000032293	Ireb2	-0.641054	4.03945e-05	0.000830127	26.2445	22.3785	30.1572	31.3387	14.0864	14.1613	11.4811	14.5966
ENSMUSG00000056267	Cep70	-0.641149	0.000240107	0.00338253	8.55231	8.01708	10.6295	9.41992	5.43292	4.7767	3.73692	4.20799
ENSMUSG00000028327	Stra6l	-0.642518	0.00181835	0.0154177	1.88492	2.02339	2.25767	2.86348	1.24095	1.04722	1.01756	1.16477
ENSMUSG00000028134	Ptbp2	-0.645771	1.40346e-06	5.79224e-05	18.7344	16.2552	18.6688	19.4041	8.89728	9.0068	8.18458	9.92804
ENSMUSG00000071267	Zfp942	-0.645862	0.00974832	0.0531955	4.35532	3.36147	5.38825	6.1226	2.78383	2.11158	1.91879	2.61535
ENSMUSG00000068457	Uty	-0.646345	0.00264743	0.0202875	9.72719	8.46757	12.4802	13.078	6.62856	5.72419	3.93035	5.19499
ENSMUSG00000060429	Sntb1	-0.657014	0.0263377	0.105979	1.93187	1.74731	1.71671	2.70043	0.906121	1.64814	1.03401	0.475101
ENSMUSG00000022206	Npr3	-0.658596	0.0197348	0.0872465	7.79682	9.34367	8.11269	7.53942	4.98357	6.31694	3.22201	1.89109
ENSMUSG00000039187	Fanci	-0.660234	0.017032	0.0786871	0.691755	0.626283	0.798805	0.771005	0.301042	0.508492	0.387258	0.212861
ENSMUSG00000031337	Mtm1	-0.660683	1.06522e-05	0.000290084	9.01347	7.7679	9.94379	10.6123	4.44316	5.69884	3.66646	4.59157
ENSMUSG00000053965	Pde5a	-0.660749	0.00129483	0.0120164	2.53574	1.92181	2.43171	2.81768	1.26445	1.12509	0.95453	1.39504
ENSMUSG00000068270	Shroom4	-0.661527	3.61996e-05	0.0007636	11.0456	10.7868	9.27499	12.418	3.99629	7.74505	5.31713	4.68005
ENSMUSG00000050714	Zbtb26	-0.661607	0.00047275	0.00574972	3.9719	3.42691	4.84628	4.9204	2.35623	2.49673	1.57808	1.99669
ENSMUSG00000024694	Keg1	-0.66253	0.00235767	0.0187691	10.274	9.56621	10.3502	11.5198	5.51795	5.56285	3.16158	6.11847
ENSMUSG00000037475	Thoc2	-0.662635	0.000580101	0.00665997	11.499	9.94076	12.657	13.1819	6.7422	5.06704	4.77703	6.20306
ENSMUSG00000004317	Clcn5	-0.663437	1.56564e-08	1.47912e-06	5.78544	5.20887	5.91696	6.10792	2.22918	3.56083	3.12728	2.41051
ENSMUSG00000025059	Gk	-0.665122	1.41651e-08	1.36157e-06	81.2989	66.8773	92.1421	79.9383	38.3819	40.6258	37.2883	39.2265
ENSMUSG00000030671	Pde3b	-0.66611	7.03164e-06	0.000211097	6.84388	6.43754	6.61826	8.59877	3.41714	4.56459	3.09527	2.96746
ENSMUSG00000040297	Suco	-0.66891	4.22702e-07	2.22956e-05	15.8192	13.94	15.1566	16.0755	7.50058	7.69829	6.37242	8.04096
ENSMUSG00000003847	Nfat5	-0.669244	2.55088e-16	2.54246e-13	67.5574	60.8727	70.669	73.9306	29.5027	40.5821	31.7869	31.854
ENSMUSG00000009376	Met	-0.669432	1.65367e-06	6.5797e-05	12.7414	13.3804	13.1817	14.3063	6.63591	9.00027	5.69358	5.09557
ENSMUSG00000094936	Rbm4	-0.671265	2.47355e-05	0.000574683	5.81054	5.26249	6.75333	6.98366	3.15393	3.83233	2.69869	2.45555
ENSMUSG00000043333	Rhbdl2	-0.675423	0.00309528	0.0227764	2.72164	2.39635	2.81285	2.32139	1.03858	1.5172	1.25309	1.17497
ENSMUSG00000022512	Cldn1	-0.676231	0.0024313	0.0191715	4.23208	5.27377	5.14229	6.33702	2.12636	4.12862	1.94853	2.18693
ENSMUSG00000020658	Efr3b	-0.677827	0.00373555	0.0262061	1.32618	0.908874	1.28982	1.0443	0.373774	0.721535	0.701097	0.411877
ENSMUSG00000017146	Brca1	-0.678098	0.00176051	0.0151007	1.26912	0.925537	1.43093	1.36729	0.585124	0.71879	0.462474	0.670174
ENSMUSG00000025626	Phf6	-0.68045	1.05139e-05	0.000287103	17.0994	14.8342	18.9273	21.3607	7.95608	9.34798	7.70004	9.83573
ENSMUSG00000007646	Rad51c	-0.681487	0.0184393	0.0831509	0.641365	0.637016	0.827241	0.726434	0.265912	0.356085	0.345999	0.410227
ENSMUSG00000073680	Tmem88b	-0.681894	0.042812	0.147064	8.44973	7.35252	9.51029	11.3309	2.31647	7.41171	6.45121	2.14938
ENSMUSG00000073176	Zfp449	-0.683242	0.00234622	0.0186929	1.66434	1.45037	1.9168	1.98585	0.981981	1.09297	0.730133	0.60116
ENSMUSG00000038663	Fsd2	-0.686434	0.0238663	0.0994048	0.840636	0.846146	0.577927	0.80066	0.416695	0.464555	0.37357	0.225559
ENSMUSG00000055660	Mettl4	-0.687656	0.00613753	0.0378607	4.89692	4.48971	6.42708	6.32977	3.04871	3.02851	1.58677	3.01012
ENSMUSG00000033578	Tmem35a	-0.688899	0.0170106	0.0786359	1.53271	1.62014	2.53492	1.93511	0.820195	0.998483	1.16424	0.656098
ENSMUSG00000074505	Fat3	-0.691717	0.00362535	0.0255996	3.34542	3.30578	4.12962	2.82882	1.64916	1.43257	1.1374	2.19922
ENSMUSG00000032357	Tinag	-0.695276	0.00994158	0.0538813	24.9144	24.7455	25.315	30.6334	16.9121	10.6147	7.69062	14.3733
ENSMUSG00000044583	Tlr7	-0.695296	0.00480133	0.0314834	2.08765	1.69658	1.82218	1.93824	1.18861	1.16304	0.620759	0.668893
ENSMUSG00000039728	Slc6a5	-0.69535	0.0176057	0.0804015	1.97405	2.0588	1.5484	1.99999	0.7917	1.53605	1.00088	0.394402
ENSMUSG00000027274	Mkks	-0.696986	0.000162329	0.0024815	2.25879	2.28846	2.41561	2.17186	0.880013	1.2253	1.07349	1.2162
ENSMUSG00000062991	Nrg1	-0.699003	1.06104e-07	7.14553e-06	5.87077	5.1525	5.55262	5.62766	1.90448	3.11224	2.9439	2.67249
ENSMUSG00000047108	Dnajb7	-0.701364	2.10166e-06	7.98655e-05	11.8919	9.67193	11.64	10.7577	5.2794	5.52876	4.87557	5.36434
ENSMUSG00000031079	Zfp300	-0.701903	0.0480224	0.158911	0.604879	0.727642	0.814506	0.99766	0.528074	0.303064	0.227552	0.446129
ENSMUSG00000073460	Pnldc1	-0.703922	0.0189959	0.0849022	1.98338	1.76152	2.31046	2.12038	0.517444	0.982679	1.39554	0.957926
ENSMUSG00000031538	Plat	-0.704565	2.11499e-06	8.01523e-05	43.2996	42.1033	55.9331	51.3251	19.1788	24.8902	20.5021	26.7744
ENSMUSG00000033965	Slc16a2	-0.70504	2.76651e-05	0.000625965	27.6132	28.3921	29.8912	34.3139	9.91417	19.8489	16.7769	11.647
ENSMUSG00000022149	C9	-0.706116	0.0374692	0.134288	1.43542	1.42045	1.62432	2.63893	1.02418	0.779252	0.63603	0.965566
ENSMUSG00000021187	Tc2n	-0.706635	0.00238342	0.0189061	1.97732	1.68726	2.52749	2.80646	1.2556	1.15847	0.809062	1.05348
ENSMUSG00000025758	Plk4	-0.708462	0.00208507	0.0170833	1.53278	1.61536	2.15144	1.45989	0.854117	0.825707	0.695342	0.852606
ENSMUSG00000024479	Mal2	-0.708767	0.000596876	0.00679505	8.34297	8.31487	10.7345	12.8464	4.68089	5.47478	3.55347	5.39312
ENSMUSG00000087230	Mroh3	-0.70926	0.0495641	0.162315	0.559422	0.608633	0.5671	0.57722	0.268178	0.239413	0.317225	0.275816
ENSMUSG00000017418	Arl5b	-0.712089	2.26495e-07	1.34373e-05	5.27851	4.64069	6.3231	6.1841	2.21589	2.86216	2.82552	2.7039
ENSMUSG00000039092	Sptlc3	-0.712718	0.021637	0.0928111	2.30447	1.53367	2.01728	2.73771	1.20372	0.879224	0.674463	1.30316
ENSMUSG00000032827	Ppp1r9a	-0.712951	1.77196e-10	3.27057e-08	9.66735	9.43222	10.0312	10.0124	4.32999	6.058	3.82681	4.4439
ENSMUSG00000040372	Gpr63	-0.718424	0.000568067	0.0065418	2.71156	3.12445	2.45636	3.29696	1.25379	1.66998	1.38713	1.17572
ENSMUSG00000024766	Lipo3	-0.718628	0.014218	0.0697566	2.31178	1.25757	1.84777	2.50001	1.13901	1.16925	0.742852	0.696541
ENSMUSG00000005268	Prlr	-0.724606	0.00301438	0.0223544	1.04275	0.995073	0.898211	1.21022	0.414912	0.515849	0.701732	0.308697
ENSMUSG00000092335	Zfp977	-0.726321	0.0307005	0.117601	1.39131	1.67029	1.3917	1.37084	0.674638	0.761556	0.522342	0.820007
ENSMUSG00000050545	Fam228b	-0.727702	0.0271029	0.108312	1.12704	1.08994	1.83999	0.936412	0.429165	0.582162	0.826751	0.472915
ENSMUSG00000003929	Zfp81	-0.729117	0.00132997	0.0122512	1.83298	1.87223	2.35118	2.63834	1.29008	1.0673	0.756782	0.94773
ENSMUSG00000054099	Slc25a40	-0.729917	9.12826e-07	4.09826e-05	3.62721	3.4042	4.39664	4.21272	1.81953	2.30079	1.69407	1.52928
ENSMUSG00000025912	Mybl1	-0.733484	0.00030424	0.00403507	1.53755	1.69936	2.04252	1.67364	0.877473	0.717838	0.884337	0.75807
ENSMUSG00000021707	Dhfr	-0.733621	9.44827e-06	0.000266773	3.41383	3.20253	3.7568	3.27584	1.47104	1.55203	1.41527	1.9332
ENSMUSG00000041301	Cftr	-0.733778	5.7112e-10	8.43311e-08	14.3771	12.4908	15.3696	12.637	5.63099	7.93721	5.42867	6.68882
ENSMUSG00000043760	Pkhd1	-0.737032	6.08971e-08	4.63329e-06	57.1664	52.0389	58.9088	69.2982	27.1141	36.4166	22.8931	24.8566
ENSMUSG00000021569	Trip13	-0.737856	0.0279814	0.110781	0.583294	0.52519	0.715206	0.747126	0.308548	0.262933	0.291983	0.343781
ENSMUSG00000028300	3110043O21Rik	-0.744125	8.09758e-07	3.76264e-05	5.14798	4.95915	5.24832	6.2959	2.38144	3.03003	2.18089	2.50194
ENSMUSG00000024892	Pcx	-0.746545	0.00310094	0.0228013	16.63	19.1907	13.6953	20.0462	5.37272	14.6048	7.71613	5.72077
ENSMUSG00000004709	Cd244	-0.747451	0.0388843	0.137941	0.563656	0.615437	0.646538	0.484898	0.162706	0.237688	0.412421	0.239057
ENSMUSG00000044934	Zfp367	-0.749455	6.53901e-05	0.00121142	3.38733	3.65021	3.94852	3.65027	1.97953	1.93389	1.22932	1.65418
ENSMUSG00000026173	Plcd4	-0.750775	1.41677e-07	8.9657e-06	7.08191	6.73582	8.69009	5.9385	2.74397	4.28121	3.28556	2.86051
ENSMUSG00000079396	Gm3411	-0.753195	0.024196	0.100219	1.20181	0.996216	1.63869	1.17737	0.702331	0.769499	0.405005	0.451458
ENSMUSG00000017144	Rnd3	-0.754336	4.27083e-07	2.24039e-05	7.9265	6.52911	6.83503	6.80338	3.41691	4.08793	3.01046	2.4539
ENSMUSG00000096916	Zfp850	-0.761458	0.0172613	0.0793742	0.610114	0.418385	0.809657	0.549404	0.35452	0.300382	0.181163	0.262524
ENSMUSG00000029283	Cdc7	-0.775358	0.00570564	0.0357073	1.26363	1.00638	0.886827	1.20354	0.641397	0.503195	0.472081	0.36648
ENSMUSG00000016477	E2f3	-0.775457	0.00134192	0.0123271	1.56932	1.58252	2.1839	2.04402	0.600131	1.15223	1.07092	0.529049
ENSMUSG00000096546	Smlr1	-0.775728	0.0120061	0.0616355	0.544679	0.696669	0.723419	0.736329	0.224611	0.410154	0.255063	0.346513
ENSMUSG00000000037	Scml2	-0.778511	0.0161608	0.0761045	0.507773	0.436496	0.593934	0.416456	0.144248	0.276576	0.268742	0.185445
ENSMUSG00000028125	Abca4	-0.780417	0.0249101	0.102278	0.480059	0.537081	0.440405	0.502056	0.324893	0.316413	0.153725	0.0990063
ENSMUSG00000034438	Gbp8	-0.78434	0.000537352	0.00629353	2.30447	2.32636	2.6293	2.59921	1.13703	1.11364	0.788648	1.43519
ENSMUSG00000027962	Vcam1	-0.78498	1.13394e-09	1.53768e-07	13.4625	15.6232	15.2735	15.6257	7.24739	7.79215	5.84169	6.17852
ENSMUSG00000023800	Tiam2	-0.786343	0.00149668	0.0133026	2.00847	1.64021	1.83765	1.84919	0.499244	1.45864	0.789651	0.616156
ENSMUSG00000016493	Cd46	-0.787648	0.00304926	0.022546	1.71785	1.19866	1.88217	2.01931	0.959024	0.720798	0.52282	0.84339
ENSMUSG00000079355	Ackr4	-0.789879	0.0489414	0.160963	1.54571	0.955711	0.995877	0.724035	0.291537	0.922764	0.344856	0.366471
ENSMUSG00000026708	Cenpl	-0.791618	0.00316134	0.0231175	1.16207	1.38107	1.70316	1.04013	0.680127	0.679805	0.381086	0.644274
ENSMUSG00000030393	Zik1	-0.802191	0.0167056	0.0777258	0.97689	0.881751	1.036	1.02348	0.707662	0.349663	0.28067	0.406721
ENSMUSG00000019817	Plagl1	-0.805019	4.67148e-05	0.000934014	2.62546	3.708	3.04055	4.15943	1.1963	1.92965	1.60377	1.3329
ENSMUSG00000005410	Mcm5	-0.805036	1.94465e-05	0.000472739	4.36766	4.38033	5.86564	6.02809	2.06794	2.8699	2.62349	1.62171
ENSMUSG00000022878	Adipoq	-0.806416	0.02679	0.1073	33.1247	42.9854	32.6303	55.388	26.99	27.6196	8.73771	10.366
ENSMUSG00000037942	Crp	-0.807376	0.0115902	0.0600728	3.46523	2.37374	4.45854	4.05679	1.84575	1.28077	1.04799	2.13561
ENSMUSG00000032179	Bmp5	-0.813307	0.0419419	0.145076	0.518738	0.51896	0.887123	0.374811	0.182933	0.334047	0.178522	0.32925
ENSMUSG00000022364	Tbc1d31	-0.818838	1.44938e-05	0.000367114	3.88881	3.22861	5.33826	3.56411	1.57112	2.31229	1.61436	1.56763
ENSMUSG00000078889	Gm14288	-0.82316	0.033016	0.123571	0.695989	0.807694	0.744308	0.984868	0.432152	0.185679	0.306713	0.496749
ENSMUSG00000037572	Wdhd1	-0.823321	0.000555151	0.00643394	2.31096	1.76929	2.68808	2.26221	1.33351	1.06394	0.757151	0.801795
ENSMUSG00000003123	Lipe	-0.823994	0.00122325	0.0114829	23.8075	30.8231	22.3467	29.8129	8.75611	19.1182	13.8824	6.58466
ENSMUSG00000094992	Fbxw25	-0.825337	8.5614e-07	3.92329e-05	10.2778	9.3183	11.5066	11.1001	3.87125	5.14118	3.95481	5.6103
ENSMUSG00000034551	Hdx	-0.826429	0.00718226	0.0424336	0.272489	0.263519	0.261691	0.348318	0.110002	0.160696	0.143132	0.0848509
ENSMUSG00000031647	Mfap3l	-0.84074	5.79346e-07	2.85153e-05	21.1411	19.6833	21.2975	25.1826	10.5952	9.845	7.33371	9.76182
ENSMUSG00000109764	Klkb1	-0.841318	0.00824571	0.0471516	0.560057	0.491238	0.475321	0.607855	0.133201	0.352687	0.189074	0.256864
ENSMUSG00000089901	Gm8113	-0.845441	0.0112724	0.0589932	1.18089	0.996229	1.22257	1.48369	0.77086	0.37537	0.501514	0.462475
ENSMUSG00000058488	Kl	-0.849466	3.04951e-13	1.40907e-10	28.0362	25.6839	26.5201	30.591	9.25249	14.9185	13.1655	10.7807
ENSMUSG00000025321	Itgb8	-0.85017	3.77363e-05	0.000786856	2.9452	2.37616	3.3574	4.24646	1.04006	1.97518	1.35084	1.26222
ENSMUSG00000032554	Trf	-0.851003	0.00193737	0.0161995	2.57935	3.03448	1.76667	2.17809	1.05379	1.36562	1.08567	0.629303
ENSMUSG00000098905	Zfp953	-0.851162	0.000885814	0.00909539	0.93552	1.18745	1.73714	1.25301	0.523219	0.627853	0.464183	0.595777
ENSMUSG00000009731	Kcnd1	-0.85407	0.00445317	0.0297174	2.1724	1.77575	2.03282	1.84741	0.314078	1.01423	1.23188	0.816058
ENSMUSG00000046623	Gjb4	-0.854317	0.0265139	0.106472	1.18199	1.69175	1.01756	1.71118	0.36264	0.882937	0.557652	0.621614
ENSMUSG00000047842	Diras2	-0.855681	0.0124666	0.0632398	0.857075	0.870305	1.02924	1.34692	0.328695	0.773612	0.492492	0.187809
ENSMUSG00000051235	Gen1	-0.857253	0.0215921	0.0926622	0.350395	0.376512	0.437175	0.519139	0.23226	0.266591	0.141294	0.0853126
ENSMUSG00000037544	Dlgap5	-0.859339	0.0333248	0.124404	0.433677	0.314551	0.376825	0.457309	0.178198	0.289245	0.112421	0.101819
ENSMUSG00000074476	Spc24	-0.860084	0.0433757	0.148336	0.967444	0.584748	1.01844	0.767864	0.206123	0.526951	0.365732	0.317991
ENSMUSG00000019894	Slc6a15	-0.861777	0.0369784	0.132936	0.398028	0.568224	0.372453	0.342995	0.121148	0.230073	0.171966	0.199358
ENSMUSG00000038292	Ccdc155	-0.86255	0.0475954	0.157891	1.02761	0.818407	1.5555	0.546942	0.270457	0.47976	0.630701	0.27816
ENSMUSG00000040724	Kcna2	-0.863266	0.00230255	0.0184853	0.790973	1.05036	1.60182	1.11879	0.279197	0.738566	0.396312	0.558776
ENSMUSG00000074863	Platr25	-0.863846	0.000564102	0.00650365	2.94125	2.84443	4.18433	4.05402	1.62015	1.36202	1.12818	1.85493
ENSMUSG00000092277	Gm19684	-0.86668	0.0252753	0.103288	1.78235	2.50344	0.992757	1.41466	0.650997	0.990632	0.577543	0.669537
ENSMUSG00000067931	Zfp948	-0.867078	0.00135007	0.0123848	2.87912	3.06278	3.79627	4.41246	2.00757	1.2953	1.13987	1.54856
ENSMUSG00000078995	Zfp456	-0.867983	0.0195481	0.0866902	0.530226	0.913375	0.930295	0.867988	0.423637	0.201132	0.315703	0.435702
ENSMUSG00000074629	4930518I15Rik	-0.872716	0.000607454	0.0068723	4.05779	3.82487	4.32577	3.71806	1.44457	1.58272	2.42334	1.21558
ENSMUSG00000001228	Uhrf1	-0.882206	2.59627e-06	9.42696e-05	4.55646	3.90867	4.88809	3.63162	1.53541	2.06498	2.26595	1.25328
ENSMUSG00000060509	Xcr1	-0.88361	0.028017	0.110822	0.414526	0.593897	0.474089	0.248586	0.176637	0.215034	0.195013	0.141297
ENSMUSG00000028347	Tmeff1	-0.885454	0.00787304	0.0454218	1.27787	0.913421	1.29974	1.87857	0.674738	0.570662	0.604906	0.401763
ENSMUSG00000036913	Trim67	-0.891407	0.0123015	0.0626691	0.352201	0.499557	0.373513	0.447269	0.120064	0.328865	0.177528	0.082322
ENSMUSG00000033383	Rtp1	-0.90248	0.0097138	0.0530652	0.8984	0.762872	1.14824	0.751326	0.448186	0.57289	0.23857	0.230475
ENSMUSG00000032218	Ccnb2	-0.903904	0.0424549	0.146266	1.25033	1.59783	3.25925	0.850619	0.685013	0.792221	0.688751	0.704523
ENSMUSG00000005493	Msh4	-0.905361	0.0394335	0.138978	0.472908	0.258497	0.615683	0.489586	0.210277	0.211188	0.223861	0.108133
ENSMUSG00000015709	Arnt2	-0.922576	4.28678e-06	0.000143377	11.3504	13.0894	12.0386	14.5432	3.64853	7.26717	6.65298	3.70914
ENSMUSG00000022309	Angpt1	-0.926255	0.00648759	0.039344	0.962902	0.884645	0.931066	0.779545	0.594951	0.254746	0.305772	0.295398
ENSMUSG00000020974	Pole2	-0.928393	0.0294568	0.114418	1.36251	0.775095	1.16247	1.7939	0.461059	0.86063	0.545382	0.210751
ENSMUSG00000033187	BC016579	-0.939665	0.000125355	0.0020217	3.21245	2.50346	2.65582	2.46557	1.03663	1.1649	1.44317	0.697104
ENSMUSG00000045751	Mms22l	-0.944029	0.000187914	0.00279127	1.55724	1.00399	1.81434	1.57044	0.663572	0.727033	0.457108	0.562035
ENSMUSG00000107023	Gm42715	-0.947441	0.00313844	0.0229753	0.160912	0.202299	0.255973	0.280976	0.0822811	0.105175	0.0973295	0.0775725
ENSMUSG00000038496	Slc19a3	-0.9532	0.00251059	0.0196106	2.55166	2.17866	2.51677	2.01431	1.29302	1.28789	0.437993	0.72537
ENSMUSG00000051969	Tlr11	-0.955361	0.0225973	0.0955164	0.916663	0.536016	0.59844	0.365472	0.299769	0.238864	0.232098	0.196195
ENSMUSG00000026039	Sgo2a	-0.964394	0.00479604	0.0314695	0.650578	0.468525	0.699445	0.553721	0.336208	0.245574	0.138147	0.236588
ENSMUSG00000047528	Als2cr12	-0.966839	0.0210231	0.0910238	1.27819	1.26953	2.81237	1.44773	0.70659	0.870935	0.282088	0.862972
ENSMUSG00000002297	Dbf4	-0.967502	0.00039353	0.00495554	1.98913	1.50203	2.72823	2.25787	1.04499	0.86506	0.741667	0.716504
ENSMUSG00000035638	Muc20	-0.988943	0.0119974	0.0616066	0.930657	1.44003	1.0102	1.27642	0.118971	0.816855	0.439077	0.489439
ENSMUSG00000044556	Tex38	-0.990528	0.0415668	0.144135	2.13111	1.40145	3.35022	1.21786	0.435892	1.03475	1.08279	0.560383
ENSMUSG00000000402	Egfl6	-0.991495	6.18686e-10	8.93688e-08	14.8413	14.0104	18.5485	18.3738	5.26834	9.0183	6.74418	4.88652
ENSMUSG00000026826	Nr4a2	-0.997282	0.00141454	0.0127764	1.11133	1.13034	1.39852	1.20448	0.391912	0.733545	0.573691	0.176345
ENSMUSG00000074060	Fbxw15	-1.00112	5.85199e-08	4.48859e-06	10.152	8.09308	9.75646	10.4532	2.80603	4.99589	3.0288	4.20868
ENSMUSG00000032113	Chek1	-1.0026	0.00149716	0.0133026	1.04431	0.800979	0.977206	0.994644	0.230172	0.285809	0.522755	0.426109
ENSMUSG00000032400	Zwilch	-1.01174	0.000167982	0.00255615	1.82649	1.67692	2.33653	2.02589	0.679782	0.971469	0.985905	0.36477
ENSMUSG00000044667	Plppr4	-1.02184	0.00122365	0.0114829	0.516106	0.638405	0.527869	0.731628	0.107404	0.302595	0.261354	0.252487
ENSMUSG00000032952	Ap4b1	-1.02401	0.0168256	0.0782006	0.512928	0.897603	0.845663	0.418745	0.249793	0.319296	0.177286	0.289021
ENSMUSG00000068854	Hist2h2be	-1.02442	1.63911e-07	1.01788e-05	3.80971	3.40672	3.68701	3.92678	1.06744	1.51063	1.30212	1.81829
ENSMUSG00000031284	Pak3	-1.04018	0.00877944	0.0492362	0.229019	0.305489	0.266032	0.270779	0.171623	0.0811135	0.0644857	0.0934467
ENSMUSG00000016200	Syt14	-1.04436	3.75993e-05	0.00078482	0.523397	0.484781	0.503564	0.533614	0.160205	0.185851	0.260847	0.155075
ENSMUSG00000022945	Chaf1b	-1.04974	1.33151e-05	0.000346505	2.73174	2.94574	3.43845	3.56889	1.5761	1.0835	1.25021	0.826386
ENSMUSG00000028341	Nr4a3	-1.05046	0.000754906	0.00810894	0.848599	0.959369	0.771706	1.05869	0.198628	0.535689	0.444607	0.188571
ENSMUSG00000026235	Epha4	-1.07214	0.000195866	0.00287299	2.74415	2.94636	3.11374	3.56033	0.552442	2.1689	1.08804	0.909081
ENSMUSG00000067878	Map7d3	-1.07902	0.0225005	0.0952485	0.402014	0.548867	0.70811	0.743269	0.362766	0.132486	0.150189	0.248732
ENSMUSG00000068748	Ptprz1	-1.08242	6.34549e-05	0.00118216	0.847373	0.762115	1.14974	0.799005	0.194984	0.340228	0.476666	0.278524
ENSMUSG00000044172	Ptx4	-1.08436	0.0286232	0.112384	0.993944	1.37915	0.566135	0.740878	0.165733	0.363165	0.470504	0.340905
ENSMUSG00000056476	Med12l	-1.08961	7.31949e-07	3.46572e-05	1.19886	1.14738	1.13927	0.99394	0.285868	0.672816	0.405781	0.285843
ENSMUSG00000047227	Gm527	-1.09135	0.00654701	0.0396079	1.07113	1.12595	1.65598	1.19762	0.535808	0.391367	0.338028	0.612298
ENSMUSG00000000861	Bcl11a	-1.10869	7.33478e-05	0.00132678	1.27851	1.44617	1.645	1.08724	0.36482	0.810078	0.548921	0.255143
ENSMUSG00000024803	Ankrd1	-1.11491	0.0229622	0.0967508	1.54937	1.49837	0.434946	1.14366	0.297098	0.614854	0.316291	0.458339
ENSMUSG00000029195	Klb	-1.12334	0.00270933	0.0205979	0.772498	0.616332	0.524075	0.95649	0.296259	0.360657	0.175221	0.203131
ENSMUSG00000027323	Rad51	-1.13054	9.68682e-06	0.000271968	1.48181	1.23672	1.29162	1.45001	0.570878	0.587567	0.460422	0.320257
ENSMUSG00000007080	Pole	-1.13979	2.68319e-10	4.57152e-08	2.32882	1.95679	2.63467	2.09989	0.732064	1.05161	0.874611	0.514491
ENSMUSG00000005628	Tmod4	-1.1416	0.0360014	0.130554	0.651105	0.839563	1.26931	0.568463	0.138724	0.455974	0.344601	0.214013
ENSMUSG00000029369	Afm	-1.1435	0.0440282	0.150001	0.360551	0.348682	1.03811	0.607563	0.283639	0.129485	0.125818	0.291717
ENSMUSG00000044164	Rnf182	-1.14447	0.0377096	0.134956	0.520847	0.335801	0.342972	0.349092	0.123302	0.036025	0.245032	0.126813
ENSMUSG00000028312	Smc2	-1.16178	2.17026e-09	2.63793e-07	1.96091	1.41921	2.02432	1.93995	0.598383	0.696955	0.596866	0.665325
ENSMUSG00000078653	Cntd1	-1.16384	0.00756555	0.0441874	1.28827	0.79282	2.79455	1.19912	0.299431	0.546778	0.584419	0.654412
ENSMUSG00000037440	Vnn1	-1.16577	0.0014001	0.0126747	1.13189	0.985166	1.66818	2.02136	0.470262	0.766247	0.513478	0.26043
ENSMUSG00000093910	Zfp853	-1.17004	0.0239581	0.0996012	0.34914	0.422059	0.265449	0.29097	0.0557908	0.163004	0.0989916	0.143449
ENSMUSG00000028259	Fhl5	-1.17756	0.0120347	0.0617503	1.3428	0.903372	2.34915	1.16773	0.522437	0.545144	0.317821	0.614076
ENSMUSG00000072980	Oip5	-1.19582	0.0110617	0.0582575	0.922826	0.520595	1.18736	0.622583	0.294926	0.359034	0.244205	0.202217
ENSMUSG00000035365	Parpbp	-1.21022	0.0100146	0.0541808	0.380445	0.386318	0.623001	0.670354	0.194538	0.319714	0.086294	0.100039
ENSMUSG00000034063	4930590J08Rik	-1.22287	0.0234921	0.0983597	0.684667	0.603706	2.31774	0.441132	0.205941	0.507682	0.365409	0.264758
ENSMUSG00000019906	Lin7a	-1.22631	0.011007	0.0580304	0.752229	0.363734	1.05584	0.688901	0.147941	0.405224	0.236248	0.152155
ENSMUSG00000051220	Ercc6l	-1.2299	0.00436255	0.0292705	0.373937	0.261869	0.289581	0.466685	0.164836	0.13244	0.070194	0.101719
ENSMUSG00000020140	Lgr5	-1.2307	0.0450434	0.152256	0.370857	0.234501	0.24025	0.434733	0.0547025	0.19978	0.168238	0
ENSMUSG00000022021	Diaph3	-1.25382	6.82643e-05	0.00125209	0.865393	0.779188	1.22864	1.0374	0.419624	0.445823	0.20306	0.215788
ENSMUSG00000037991	Rmi2	-1.25648	0.000270157	0.00369669	0.694257	0.600729	0.786416	0.678643	0.116778	0.221772	0.248643	0.312269
ENSMUSG00000074500	Zfp558	-1.26081	0.000336295	0.00436724	1.42917	0.657077	1.38119	1.31658	0.329458	0.393781	0.340113	0.49286
ENSMUSG00000031111	Igsf1	-1.26362	0.0002651	0.00365204	0.525774	0.568286	0.752456	0.60387	0.276758	0.245469	0.154334	0.121989
ENSMUSG00000024795	Kif20b	-1.27513	1.71354e-05	0.000424846	0.823243	0.831792	1.29924	1.15859	0.408394	0.263881	0.278703	0.371561
ENSMUSG00000044647	Csrnp3	-1.29525	0.000834108	0.00873329	0.204996	0.14249	0.221796	0.16474	0.0655145	0.0598166	0.0639345	0.0421127
ENSMUSG00000058145	Adamts17	-1.30222	0.0232781	0.097772	0.138522	0.23701	0.259243	0.0913395	0.0272432	0.0497478	0.0676741	0.0840574
ENSMUSG00000026368	F13b	-1.31249	0.0374575	0.134271	0.31611	0.444661	0.349581	0.492673	0.0734731	0.0268333	0.208586	0.188914
ENSMUSG00000025001	Hells	-1.32491	3.28117e-06	0.000114548	1.01361	0.923905	1.46088	1.53133	0.417024	0.304604	0.359399	0.444219
ENSMUSG00000062510	Nsl1	-1.32542	0.00166745	0.0144517	0.322283	0.338776	0.550702	0.413725	0.0537382	0.183175	0.165273	0.0921146
ENSMUSG00000027326	Knl1	-1.32747	0.0112117	0.0587522	0.464538	0.220385	0.803767	0.342271	0.16807	0.147315	0.0397616	0.207428
ENSMUSG00000027306	Nusap1	-1.35301	0.000123816	0.00200499	1.04701	0.768786	1.14303	0.720216	0.39658	0.307776	0.281466	0.127461
ENSMUSG00000034317	Trim59	-1.36267	0.00352039	0.0250985	0.395448	0.854846	1.13189	0.753286	0.17842	0.412688	0.126631	0.244669
ENSMUSG00000041498	Kif14	-1.36726	0.0137467	0.068081	0.21405	0.059144	0.278984	0.182028	0.0390904	0.0713813	0.0762953	0.0301528
ENSMUSG00000060508	Nlrp9b	-1.37362	2.72045e-06	9.77108e-05	1.0829	1.14606	1.51043	1.51792	0.417914	0.324333	0.389298	0.45668
ENSMUSG00000026874	Hc	-1.38619	0.0168493	0.0782191	0.17578	0.218564	0.223231	0.310925	0.0321015	0.0820669	0.0227835	0.148571
ENSMUSG00000022490	Ppp1r1a	-1.39251	0.0157136	0.0746526	1.30869	2.32873	0.636794	1.84476	0.73611	0.68431	0.284968	0.13765
ENSMUSG00000002944	Cd36	-1.39534	2.66478e-06	9.65529e-05	32.8656	30.9473	29.7375	50.2873	14.2446	14.6303	8.52225	5.42115
ENSMUSG00000035455	Fignl1	-1.39678	0.000133319	0.0021159	0.850553	0.622473	1.14008	0.831999	0.323255	0.257578	0.229425	0.211566
ENSMUSG00000028873	Cdca8	-1.39848	0.000572804	0.00658874	0.610775	0.708803	0.95255	0.969549	0.416421	0.247133	0.166246	0.133838
ENSMUSG00000008438	Adam21	-1.41016	0.0129877	0.0652297	0.375767	0.249836	0.483481	0.31316	0.0900683	0.109647	0.170465	0.0308778
ENSMUSG00000047819	Tigd4	-1.41961	0.00103921	0.01024	0.513882	0.51608	0.573337	0.621218	0.227397	0.203007	0.0537971	0.181902
ENSMUSG00000055202	Zfp811	-1.43084	0.00278184	0.0210209	0.573342	0.344153	0.777003	0.357774	0.075821	0.221526	0.179376	0.103974
ENSMUSG00000021965	Ska3	-1.45819	0.000911406	0.00927828	0.816762	0.468075	1.01904	0.921981	0.193355	0.225969	0.219569	0.278406
ENSMUSG00000022181	C6	-1.46142	7.69034e-07	3.6241e-05	3.06649	3.10348	2.29112	4.664	0.82048	1.44275	0.8627	0.625072
ENSMUSG00000041020	Map7d2	-1.46197	0.00137709	0.0125232	0.484337	0.468394	0.435785	0.514532	0.0238137	0.156547	0.219718	0.12246
ENSMUSG00000045569	Mc2r	-1.48804	0.0412064	0.143352	0.525219	0.465603	0.491472	0.917111	0.335709	0.122605	0	0.23018
ENSMUSG00000020839	Tmigd1	-1.49218	5.21204e-10	7.93105e-08	4.12017	3.70655	4.21408	4.97374	1.04116	1.38677	1.30402	0.944836
ENSMUSG00000037071	Scd1	-1.4929	1.0937e-06	4.69867e-05	323.24	360.204	252.242	377.804	66.0352	164.488	106.433	41.2068
ENSMUSG00000028654	Mycl	-1.49468	1.66369e-14	1.00497e-11	6.30741	5.40104	4.9154	4.70553	0.973566	1.71397	1.84259	1.33506
ENSMUSG00000026354	Lct	-1.49474	0.00535351	0.034084	0.332196	0.2463	0.36266	0.200386	0.0283111	0.186112	0.0703267	0.0291174
ENSMUSG00000049929	Lpar4	-1.50637	0.000328456	0.00427937	0.500082	0.327614	0.392474	0.522394	0.10311	0.165691	0.102453	0.106047
ENSMUSG00000044966	Fbxo48	-1.51062	0.00179263	0.0152896	0.548995	0.593385	0.815909	0.615162	0.0825662	0.271387	0.2051	0.127377
ENSMUSG00000022322	Shcbp1	-1.53668	0.0123412	0.0627604	0.183639	0.50741	0.810099	0.549704	0.10061	0.146975	0.0714061	0.241442
ENSMUSG00000028289	Epha7	-1.5386	1.35359e-05	0.000349514	0.364835	0.450832	0.749168	0.472966	0.155463	0.141943	0.128727	0.119918
ENSMUSG00000066000	Zfp979	-1.55041	0.00786605	0.0454058	0.263554	0.407806	0.591888	0.803268	0.20215	0.0738277	0.167385	0.103954
ENSMUSG00000027965	Olfm3	-1.56579	0.000758589	0.00812996	0.294237	0.313007	0.578196	0.546478	0.169263	0.0961597	0.0800879	0.116056
ENSMUSG00000029211	Gabra4	-1.57938	0.00460687	0.030479	0.399412	0.466736	0.280311	0.317015	0.170197	0.0621581	0.0301987	0.131283
ENSMUSG00000078926	Cdc20b	-1.58891	0.000237348	0.00335791	0.844025	1.06111	1.10571	1.36661	0.269742	0.275836	0.268023	0.332909
ENSMUSG00000054385	Ceacam2	-1.59674	0.00880514	0.0493038	0.283044	0.252671	0.468594	0.186635	0.0834996	0.0813201	0.0592625	0.0858778
ENSMUSG00000021062	Rab15	-1.63726	7.80878e-05	0.00139058	1.81848	1.57019	1.01288	2.80419	0.193722	0.606425	0.667814	0.341553
ENSMUSG00000050663	Trhde	-1.65644	0.00830014	0.047354	0.131611	0.173562	0.156742	0.113957	0.0458853	0.0223438	0.0434219	0.0314615
ENSMUSG00000079262	Slco1a6	-1.65839	0.0127068	0.0642072	0.46144	0.281843	0.386339	0.370102	0.0931399	0.0226772	0.0440697	0.223516
ENSMUSG00000026669	Mcm10	-1.67663	6.29078e-07	3.03063e-05	0.800671	0.543378	1.01211	0.709079	0.23344	0.183626	0.16568	0.166215
ENSMUSG00000046338	Gpat2	-1.68133	0.00310454	0.0228193	0.624347	0.40253	0.852003	0.445992	0.0997675	0.121454	0.283233	0.034203
ENSMUSG00000022026	Olfm4	-1.72602	0.000677573	0.00745405	0.610193	0.49569	0.913578	1.1391	0.34322	0.205115	0.13287	0.0641809
ENSMUSG00000074651	Mcidas	-1.74859	0.000178301	0.00267439	0.891606	0.806627	0.78049	0.767024	0.257372	0.214847	0.260951	0
ENSMUSG00000046591	Ticrr	-1.7897	0.000108917	0.00181232	0.218422	0.36736	0.479866	0.32562	0.0485602	0.0798065	0.137859	0.0374574
ENSMUSG00000030641	Ddias	-1.82574	0.00115578	0.0110025	0.544991	0.312326	1.2466	0.442174	0.180624	0.169627	0.146509	0.0530767
ENSMUSG00000028587	Orc1	-1.83453	0.000801651	0.00845508	0.499022	0.307106	0.488184	0.410479	0.173981	0.0847197	0.06174	0.0596452
ENSMUSG00000078773	Rad54b	-1.94817	1.27768e-05	0.000336894	0.809911	0.64503	1.04765	0.862149	0.0304517	0.311397	0.194513	0.125276
ENSMUSG00000028519	Dab1	-2.01548	1.48602e-06	6.04537e-05	0.55698	0.450959	0.48483	0.592178	0.0331172	0.108853	0.176283	0.0681208
ENSMUSG00000021478	Drd1	-2.07375	0.0493403	1	0.152944	0.166398	0.0178896	0.182089	0.0244397	0.053554	0.0173457	0
ENSMUSG00000022422	Dscc1	-2.0755	0.000293911	0.00393209	0.520924	0.20151	0.545947	0.793842	0.0799113	0.0972818	0.0945262	0.109583
ENSMUSG00000054986	Sec14l3	-2.1849	4.13933e-10	6.54868e-08	1.98531	2.11688	1.2385	1.52727	0.260302	0.308962	0.254024	0.368108
ENSMUSG00000030244	Gys2	-2.23693	0.0470127	1	0.180114	0.0995342	0.168541	0.0980277	0.0657857	0	0	0.0338297
ENSMUSG00000094151	Gm7233	-2.30296	0.0262847	1	0.388223	0.150177	0.254295	0.221857	0	0.10875	0	0.0510422
ENSMUSG00000039748	Exo1	-2.31442	1.17826e-06	4.99734e-05	0.359544	0.288344	0.484149	0.39256	0.0112104	0.0818834	0.11139	0.0230594
ENSMUSG00000093550	Higd1c	-2.32416	0.0235525	1	0.369546	0.953017	0.922137	0.938593	0	0.230041	0.223525	0
ENSMUSG00000090486	BC035947	-2.36807	0.00112363	0.0107893	0.17856	0.323778	0.334173	0.382654	0.0285329	0.104206	0.0202508	0.0293455
ENSMUSG00000025592	Dach2	-2.42545	0.000276321	0.00375941	0.198931	0.141081	0.223379	0.214734	0.0339074	0.0371501	0.0240652	0.0174365
ENSMUSG00000034336	Ina	-2.44017	0.00627115	1	0.147704	0.163248	0.256683	0.180875	0	0.0394051	0.0574334	0
ENSMUSG00000071424	Grid2	-2.48083	0.0277227	1	0.0583328	0.0564126	0.0982525	0.044447	0	0.0108936	0.02117	0
ENSMUSG00000036083	Slc17a3	-2.5407	0.011415	1	0.0946024	0.0914883	0.191802	0.105121	0	0.0147224	0.0429161	0
ENSMUSG00000039396	Neil3	-2.55556	1.11889e-05	0.000302221	0.686984	0.342901	0.705054	0.422139	0.0283294	0.0827699	0.0603191	0.116545
ENSMUSG00000030209	Grin2b	-2.55999	5.53896e-07	2.75346e-05	0.0795615	0.0796904	0.0877439	0.146143	0.0217946	0.0159193	0.00773418	0.00747177
ENSMUSG00000020213	Glipr1l1	-2.59892	0.0357943	1	0.152603	0.221369	2.07056	0.218019	0	0.0712459	0.0692278	0.200637
ENSMUSG00000031481	Tpte	-2.64001	0.0353654	1	0.12793	0.0742315	0.57461	0.0487387	0	0.0238908	0.0696423	0
ENSMUSG00000075502	Kbtbd6	-2.65233	0.0218964	1	0.114554	0.13294	0.51453	0.174571	0	0	0.103935	0
ENSMUSG00000042002	Foxn4	-2.67073	0.000496299	0.00595888	0.770705	0.350746	0.339381	0.237488	0.0579551	0.126995	0.0205664	0
ENSMUSG00000056758	Hmga2	-2.71638	4.0125e-11	9.30059e-09	0.825417	0.937071	1.20894	0.922888	0.068816	0.167549	0.048841	0.188736
ENSMUSG00000033419	Snap91	-2.82652	1.62011e-08	1.49515e-06	0.791392	1.14801	0.656932	1.00906	0	0.202617	0.138973	0.0503466
ENSMUSG00000032908	Sgpp2	-2.84146	8.20609e-12	2.21054e-09	0.734568	0.859073	1.05503	1.09013	0.0655145	0.0957066	0.0774964	0.179681
ENSMUSG00000094091	Gm21885	-2.86772	0.0468874	1	0.441071	0.170621	0.330185	0.168038	0	0.0823694	0	0
ENSMUSG00000033849	B3galt2	-3.0101	2.32325e-13	1.15779e-10	1.19979	1.22436	1.28801	2.29248	0.178782	0.281793	0.0734614	0.0580655
ENSMUSG00000001021	S100a3	-3.33526	0.0121471	1	0.0870074	0.105179	0.122125	0.0621523	0	0.0203106	0	0
ENSMUSG00000049641	Vgll2	-3.36456	0.0462164	1	0.041434	0.24042	0.0775434	0.0789272	0	0	0	0
ENSMUSG00000078521	Aunip	-3.63274	0.00576654	1	0.482584	0.155566	0.250876	0.255353	0	0	0.0486495	0
ENSMUSG00000053508	BC048502	-3.68637	0.0265402	1	0.0952173	0.092083	1.78199	0.181379	0	0.0889085	0	0
ENSMUSG00000048516	Adam26a	-4.04456	0.049298	1	0.0824018	0	0.719667	0	0.035113	0	0	0

## Sheet: Is
Gene ID	Gene name	log2FC	Pvalue	FDR	3M-Is1	3M-Is2	3M-Is3	3M-Is4	21M-Is1	21M-Is2	21M-Is3	21M-Is4
ENSMUSG00000032359	Ctsh	-0.585195	2.39911e-06	0.000153718	77.9457	71.5145	103.124	64.3728	47.719	48.0626	58.2989	56.6152
ENSMUSG00000001517	Foxm1	-0.589776	0.00509886	0.0640586	0.992588	0.970362	1.28565	1.01925	0.725943	0.676766	0.7075	0.724366
ENSMUSG00000028599	Tnfrsf1b	-0.590962	2.97792e-05	0.00118452	14.9893	12.9158	17.599	10.5643	7.82961	9.33857	10.5507	9.4081
ENSMUSG00000033721	Vav3	-0.591016	5.33425e-06	0.00028872	5.17156	4.9752	6.21356	4.0056	3.46398	3.08935	3.52118	3.41414
ENSMUSG00000024558	Mapk4	-0.591851	0.0413608	0.264618	1.10131	0.816635	1.40311	0.995185	1.1917	0.61949	0.577971	0.460357
ENSMUSG00000014837	4931428F04Rik	-0.594201	0.0115533	0.114075	1.08331	1.04565	1.20271	1.01452	0.77469	0.797715	0.564019	0.746842
ENSMUSG00000042849	Olfr1414	-0.600738	0.039887	0.258998	0.627883	0.674256	0.65928	0.535855	0.322203	0.693289	0.36863	0.274061
ENSMUSG00000003355	Fkbp11	-0.602154	0.00182104	0.0300385	21.7257	20.2455	35.0646	32.9507	17.196	15.074	22.3165	17.8507
ENSMUSG00000036777	Anln	-0.606703	0.0038947	0.0530642	1.32177	1.69995	1.97467	1.23558	1.05929	1.29898	0.761333	0.980869
ENSMUSG00000034023	Fancd2	-0.607223	0.0222982	0.178952	1.14235	1.04703	1.28436	0.550541	0.624025	0.8996	0.545191	0.572326
ENSMUSG00000047434	Xxylt1	-0.608399	0.000256084	0.00666408	3.32597	3.19468	4.33149	3.87323	2.44962	2.18706	2.10793	2.92836
ENSMUSG00000063931	Pepd	-0.608679	9.8032e-07	7.19519e-05	44.2984	38.185	46.4288	34.82	21.6441	25.6502	27.92	32.2083
ENSMUSG00000029108	Pcdh7	-0.61677	7.98753e-05	0.00258336	2.68382	2.49117	3.36233	2.25248	1.42376	1.53205	2.06871	1.99951
ENSMUSG00000020961	Ston2	-0.617366	7.68926e-07	5.86139e-05	3.90251	3.37787	4.55745	3.09203	2.7111	2.45763	2.09675	2.46331
ENSMUSG00000075031	Hist1h2bb	-0.617652	0.0468171	0.284161	4.40708	4.16183	5.16585	3.73349	2.83147	2.16912	3.23946	3.10498
ENSMUSG00000032997	Chpf	-0.620941	0.000147613	0.00424693	5.16374	5.17748	7.52564	7.96657	4.1092	3.87282	4.44369	4.4098
ENSMUSG00000016756	Cmah	-0.621095	0.00621477	0.0734831	0.593205	0.612911	0.716962	0.432707	0.511093	0.36986	0.306987	0.336914
ENSMUSG00000067370	B3galt4	-0.623357	0.0217452	0.175763	1.60526	1.96661	1.78925	2.17585	1.27548	1.25411	1.32246	1.05101
ENSMUSG00000037466	Tedc1	-0.625732	0.00880977	0.094078	1.87149	1.95707	2.19705	1.28021	0.922444	1.49545	1.48466	0.824514
ENSMUSG00000028716	Pdzk1ip1	-0.627982	0.041878	0.266453	2.72661	4.20079	4.70286	5.48769	4.20986	3.34631	1.58436	1.96865
ENSMUSG00000031785	Adgrg1	-0.632612	3.34462e-11	8.25946e-09	56.9412	55.0549	61.046	57.9579	44.2751	38.788	31.402	34.9165
ENSMUSG00000057719	Sh3rf2	-0.63315	0.0135924	0.128791	0.714463	0.953843	0.671176	1.10499	0.577242	0.618287	0.407491	0.633613
ENSMUSG00000090202	4930503B20Rik	-0.635222	0.0119343	0.11696	1.81633	2.6098	2.582	1.39814	1.5334	1.17305	1.27276	1.41326
ENSMUSG00000021902	Phf7	-0.636557	0.000269994	0.0069272	4.25988	6.82165	4.04048	4.13513	2.62725	3.16004	3.17703	3.43138
ENSMUSG00000028186	Uox	-0.641083	0.0128522	0.123608	2.99072	3.00631	3.81292	1.5014	2.35348	2.01299	1.41165	1.44075
ENSMUSG00000050666	Vstm4	-0.6479	0.0161991	0.145189	1.1979	1.24898	1.71193	1.26671	1.16192	0.831522	0.547375	0.914168
ENSMUSG00000033722	BC034090	-0.649692	5.94648e-08	6.5569e-06	18.1474	15.4197	18.9988	12.0655	10.1001	10.3856	10.5717	10.0785
ENSMUSG00000075334	Rprm	-0.649863	8.11999e-07	6.13059e-05	31.8185	23.326	33.0226	28.709	16.577	17.0893	20.5828	20.3305
ENSMUSG00000022969	Il10rb	-0.650833	5.05538e-10	9.58783e-08	15.667	13.9218	17.9086	14.2025	9.11975	10.265	10.0493	9.89011
ENSMUSG00000026479	Lamc2	-0.653315	2.72693e-10	5.47858e-08	11.7327	11.5078	14.7727	10.1735	7.39951	7.86469	7.4404	7.91387
ENSMUSG00000020541	Tom1l1	-0.658512	3.69607e-05	0.00140646	2.7933	2.5334	3.10245	2.90567	2.2356	1.68086	1.46156	1.79741
ENSMUSG00000009108	Gnat2	-0.673484	0.00204285	0.0327136	1.72266	1.9289	2.08439	2.10902	1.11765	1.50039	1.02295	1.30979
ENSMUSG00000054200	Ffar4	-0.677887	0.0188521	0.1606	2.46099	2.42018	1.44577	2.63229	1.48153	1.41256	1.2841	1.44114
ENSMUSG00000063383	Zfp947	-0.680765	0.0310654	0.220278	0.779525	0.895312	0.63749	0.880507	0.435506	0.548105	0.398606	0.624102
ENSMUSG00000035842	Ddx11	-0.682307	0.00128147	0.0229976	1.73344	1.6581	1.82542	1.07249	0.795692	0.983849	0.958256	1.18428
ENSMUSG00000056544	Defb21	-0.68414	0.000402029	0.00939932	74.0586	86.9825	87.6132	38.0507	46.7209	43.5013	37.1992	50.3725
ENSMUSG00000051736	Fam229b	-0.68463	0.00960844	0.100162	1.57682	2.19925	1.56593	1.35911	1.45287	1.17352	0.64504	0.894968
ENSMUSG00000051727	Kctd14	-0.684647	0.00922731	0.0973961	1.31385	1.58521	1.66703	1.43008	1.06767	1.00778	1.03828	0.612009
ENSMUSG00000040413	Timd2	-0.685002	0.0117458	0.115404	1.09989	1.07408	1.20974	1.10193	0.662576	0.887683	0.782499	0.465564
ENSMUSG00000025780	Itih5	-0.685469	1.4629e-06	0.000102606	7.04938	7.82612	10.429	7.90656	6.36469	5.66896	3.8492	4.78282
ENSMUSG00000099583	Hist1h3d	-0.695309	0.0326039	0.22687	1.62443	2.33321	2.5897	2.12591	1.10156	0.819217	1.31757	2.12393
ENSMUSG00000037624	Kcnk2	-0.695569	0.000175482	0.00492325	6.11094	6.35076	5.67236	4.21234	4.32448	4.23066	2.3436	2.91043
ENSMUSG00000035441	Myo1d	-0.695967	1.68319e-07	1.61552e-05	10.5715	11.3769	11.49	12.1741	9.15769	7.26218	5.2787	6.54833
ENSMUSG00000033788	Dysf	-0.705738	0.000703906	0.0147677	2.85897	3.02377	4.62002	6.09622	2.31659	2.71885	2.26124	2.95092
ENSMUSG00000021396	Nxnl2	-0.708058	0.0450083	0.278158	0.722752	0.74771	1.59718	1.04497	0.775272	0.785995	0.29566	0.666603
ENSMUSG00000031762	Mt2	-0.710502	8.96134e-11	2.0233e-08	61.0631	77.8278	84.1986	72.3756	47.6077	48.3645	42.9859	41.6712
ENSMUSG00000040649	Rimklb	-0.711458	0.0190878	0.161785	1.18455	1.40282	1.07205	2.51544	1.03238	1.33262	0.529998	0.92561
ENSMUSG00000029869	Ephb6	-0.718432	4.61735e-11	1.11697e-08	11.0839	10.3285	11.9884	10.4527	6.0178	7.15526	7.41744	6.07956
ENSMUSG00000028214	Gem	-0.718655	0.00443792	0.0584174	1.56945	2.19334	2.46428	2.83641	1.71467	1.2948	1.28404	1.2152
ENSMUSG00000054161	Fam83e	-0.720965	0.0056468	0.0687211	1.27511	1.02178	1.42709	1.17397	0.860228	0.568386	0.811947	0.714996
ENSMUSG00000027867	Spag17	-0.722881	0.0150192	0.138007	0.774196	1.10473	0.659816	0.804127	0.851136	0.520581	0.245719	0.410374
ENSMUSG00000031561	Tenm3	-0.730184	3.73565e-05	0.00141471	1.19454	1.12866	1.46426	1.41807	1.02591	0.711454	0.630782	0.768095
ENSMUSG00000050534	Htr5b	-0.736436	0.00271391	0.0403631	4.08566	2.42147	5.23557	3.36522	1.8099	2.0338	2.62534	2.59369
ENSMUSG00000000202	Btbd17	-0.742738	0.00320947	0.0457634	1.66798	1.64611	1.85916	2.65861	1.15966	1.64192	0.852911	1.06833
ENSMUSG00000051323	Pcdh19	-0.746054	0.00669792	0.077837	0.346786	0.333215	0.468588	0.34409	0.13372	0.27539	0.215574	0.271764
ENSMUSG00000030200	Bcl2l14	-0.74792	0.00100288	0.0190813	2.27698	2.82774	3.37388	4.00236	1.42197	1.89488	2.16914	1.98181
ENSMUSG00000045467	Ttll13	-0.748984	0.0104572	0.106857	1.65028	2.77161	1.05432	1.49125	1.03885	1.30744	1.02214	0.786045
ENSMUSG00000024176	Sox8	-0.760467	0.0336874	0.23173	0.629662	0.590455	0.935779	0.505763	0.291847	0.446011	0.500849	0.334585
ENSMUSG00000027661	Slc2a10	-0.76439	0.0235672	0.185064	0.55275	0.515944	0.551053	0.624355	0.282341	0.444175	0.262457	0.343918
ENSMUSG00000027737	Slc7a11	-0.773138	2.8351e-07	2.47102e-05	10.0662	9.8446	15.8148	7.89656	6.48915	6.3236	6.52427	6.07126
ENSMUSG00000055745	Rtl6	-0.774326	1.06193e-05	0.00050285	2.22881	2.27221	2.41303	2.31399	1.55428	1.67161	0.986113	1.19873
ENSMUSG00000045684	Lcn6	-0.776451	0.00138149	0.02426	96.7423	102.571	134.322	174.083	63.4862	67.159	82.3907	84.5611
ENSMUSG00000021175	Cdca7l	-0.78105	2.92093e-06	0.000182709	6.05694	6.49283	4.78821	7.39745	3.76458	4.20556	2.85522	3.66122
ENSMUSG00000034206	Polq	-0.784719	0.0089337	0.0950589	0.300024	0.476836	0.297082	0.271112	0.17396	0.237182	0.190733	0.182815
ENSMUSG00000026994	Galnt3	-0.790582	4.77126e-07	3.9412e-05	4.52009	6.33917	7.14755	6.49291	4.3946	3.66696	2.98354	3.11886
ENSMUSG00000006398	Cdc20	-0.79706	0.0156363	0.141809	1.79491	1.944	3.53989	1.44564	1.67421	1.14133	1.43658	0.719768
ENSMUSG00000070639	Lrrc8b	-0.801079	9.68984e-08	9.94447e-06	3.19335	3.65307	3.81091	3.53418	2.53836	2.11807	1.37228	2.13193
ENSMUSG00000035557	Krt17	-0.805403	1.57149e-05	0.000695173	5.54828	4.86305	5.74484	4.44296	2.45961	3.45077	3.13694	2.77357
ENSMUSG00000040424	Hipk4	-0.806371	0.0259216	0.197152	0.81296	0.488216	0.646583	0.583374	0.363348	0.268995	0.440156	0.367551
ENSMUSG00000021806	Nid2	-0.808833	0.0002327	0.00618456	3.35751	3.41017	6.45837	5.58819	3.51427	2.77641	1.81956	2.66143
ENSMUSG00000058952	Cfi	-0.811565	0.0148765	0.137068	2.12007	2.14381	3.46389	2.46313	2.73738	1.32505	0.791556	0.931128
ENSMUSG00000020411	Nipal4	-0.813925	9.51599e-06	0.000463235	4.87543	3.93216	5.86545	3.46941	2.16089	2.19395	2.8462	3.10187
ENSMUSG00000070345	Hsf5	-0.818811	0.00435412	0.0577633	0.605735	1.01694	0.64581	0.699408	0.391054	0.473232	0.412986	0.413835
ENSMUSG00000032724	Abtb2	-0.82914	0.00473959	0.0612658	0.951661	0.626819	0.937261	0.554809	0.493942	0.397166	0.298255	0.534816
ENSMUSG00000026255	Efhd1	-0.829836	0.0115669	0.114162	2.79246	4.28402	2.76507	3.37585	3.47437	1.78303	1.27354	0.889443
ENSMUSG00000038264	Sema7a	-0.83896	0.00412831	0.0555901	44.1164	32.9292	43.7403	20.0572	14.397	18.5012	20.79	24.8558
ENSMUSG00000034520	Gjc1	-0.841265	3.34451e-06	0.000201753	2.23437	2.27693	2.8789	2.20429	1.28266	1.59122	1.21591	1.28143
ENSMUSG00000047003	Zfp41	-0.843992	0.0117059	0.115198	0.505617	0.611786	0.833106	0.609191	0.385007	0.252809	0.26812	0.518152
ENSMUSG00000041673	Lrrc18	-0.85034	0.0158498	0.143307	1.64967	1.89954	1.34467	1.39295	1.54715	0.943156	0.304232	0.692857
ENSMUSG00000074676	Foxs1	-0.851558	0.00242474	0.0373511	1.81443	2.31004	2.46723	2.74871	1.14487	1.44088	1.30984	1.31253
ENSMUSG00000021721	Htr1a	-0.854853	7.048e-06	0.000361769	5.03966	3.78475	4.5731	2.70703	1.81312	2.65051	1.9148	2.54233
ENSMUSG00000096141	Dnah7a	-0.8574	0.0415085	0.26524	0.302818	0.601973	0.289072	0.180704	0.388153	0.147838	0.111021	0.105394
ENSMUSG00000028678	Kif2c	-0.86099	0.00438304	0.058033	1.15701	1.80953	1.05223	0.956537	0.748175	0.886225	0.654572	0.454097
ENSMUSG00000042246	Tmc7	-0.871628	0.0129006	0.123871	0.615595	0.628473	0.590691	0.667528	0.605301	0.346273	0.220347	0.189257
ENSMUSG00000014786	Slc9a5	-0.871635	0.00817205	0.0896208	0.493189	0.460349	0.706782	0.557078	0.283408	0.356682	0.25219	0.32491
ENSMUSG00000051378	Kif18b	-0.872957	0.0310111	0.220107	0.33656	0.498221	0.935804	0.437183	0.376059	0.307638	0.236635	0.280234
ENSMUSG00000025207	Sema4g	-0.875507	0.00117568	0.0215894	18.7355	10.8834	21.3307	10.7497	6.91057	7.86733	9.38384	9.40313
ENSMUSG00000072919	Noxred1	-0.876847	0.0339484	0.233144	1.20476	1.5111	0.638065	0.8165	0.807694	0.484058	0.440036	0.529128
ENSMUSG00000037225	Fgf2	-0.887662	6.12081e-12	1.81383e-09	3.81847	3.74051	4.33222	3.13297	2.10451	2.1479	1.67704	2.19664
ENSMUSG00000100937	1700020D05Rik	-0.891696	0.00382355	0.0523355	2.26127	2.46248	2.21163	2.41488	1.2863	1.3876	0.981094	1.40444
ENSMUSG00000026683	Nuf2	-0.896147	0.043366	0.272194	0.305906	0.705442	0.674962	0.276427	0.353871	0.384632	0.165625	0.147524
ENSMUSG00000092035	Peg10	-0.896226	0.0189117	0.160868	0.230864	0.239979	0.201386	0.25603	0.103184	0.129862	0.128783	0.139802
ENSMUSG00000027356	Fermt1	-0.896438	6.39889e-09	8.92344e-07	6.69426	6.88614	8.27552	5.62657	4.7537	3.87827	2.59634	3.53281
ENSMUSG00000051956	Rnf133	-0.902233	0.0275893	0.204778	1.10218	1.92898	0.961448	1.28053	0.703735	1.06282	0.697785	0.376503
ENSMUSG00000024989	Cep55	-0.905498	0.0413665	0.264618	0.557469	0.393218	0.375768	0.480851	0.31711	0.199549	0.285059	0.155806
ENSMUSG00000027496	Aurka	-0.913463	0.0063042	0.0743299	1.61593	2.03967	1.63385	0.862851	1.149	0.743697	0.563384	0.790359
ENSMUSG00000004633	Chn2	-0.914704	0.00315533	0.0451711	1.21959	1.57075	1.02295	0.699388	0.79667	0.52771	0.503703	0.552809
ENSMUSG00000022103	Gfra2	-0.919096	0.00503384	0.0634773	0.705266	0.674762	0.949185	0.655511	0.414282	0.204024	0.494584	0.4543
ENSMUSG00000062939	Stat4	-0.921529	0.0330035	0.228709	0.44577	0.670667	0.266056	0.699623	0.335553	0.263943	0.215945	0.288519
ENSMUSG00000030077	Chl1	-0.924347	0.00367661	0.0508229	0.35157	0.846307	0.347031	0.618661	0.330805	0.281025	0.274391	0.255993
ENSMUSG00000033847	Pla2g4c	-0.931085	0.00477081	0.0615017	0.577861	0.825929	0.918137	0.951104	0.553439	0.557224	0.232167	0.380691
ENSMUSG00000029769	Ccdc136	-0.933826	8.41587e-05	0.00268486	1.79203	2.86749	1.57916	2.03244	1.43842	1.1726	0.80414	0.91823
ENSMUSG00000043789	Vwce	-0.937134	0.02799	0.206523	0.454558	0.451961	0.861993	0.250024	0.317993	0.222339	0.202118	0.3038
ENSMUSG00000068246	Apol9b	-0.939351	0.00167343	0.0281162	3.62265	3.21764	3.9896	1.75953	2.18582	2.03774	1.15776	1.16014
ENSMUSG00000028167	Bdh2	-0.948837	0.0165787	0.147423	0.446474	0.492279	0.486831	0.403449	0.239459	0.276256	0.228302	0.205894
ENSMUSG00000027520	Zdbf2	-0.963049	0.0473824	0.286277	0.0886371	0.167409	0.120811	0.220263	0.128752	0.105949	0.0169965	0.0567716
ENSMUSG00000101337	Dnah7c	-0.964045	0.028758	0.209839	0.315223	0.561718	0.30497	0.238235	0.379115	0.199881	0.0527524	0.0939748
ENSMUSG00000041423	Paqr6	-0.964718	0.00229218	0.0358684	1.3406	1.53972	1.86376	1.24927	0.898758	0.565566	0.856884	0.729848
ENSMUSG00000042662	Dusp15	-0.970443	2.29014e-10	4.64038e-08	30.2016	24.3273	31.9388	17.8663	11.0217	13.092	13.1563	15.9214
ENSMUSG00000052496	Pkdrej	-0.970476	0.0437256	0.273943	0.138775	0.477658	0.164289	0.340376	0.221517	0.189577	0.0912366	0.0711077
ENSMUSG00000031831	Dnaaf1	-0.978799	0.00707536	0.0810317	1.73604	3.30165	2.09848	1.23259	1.99521	1.00443	0.557992	0.660801
ENSMUSG00000027331	Knstrn	-0.982402	3.56505e-05	0.00137202	0.98817	1.32857	1.29962	1.01658	0.693061	0.718325	0.528616	0.405067
ENSMUSG00000049897	Stkld1	-0.990046	0.0484512	0.290371	0.419323	0.526886	0.393918	0.349767	0.172998	0.254013	0.230912	0.198332
ENSMUSG00000037418	Best1	-0.99322	0.0154099	0.140509	0.739987	0.851618	0.762864	0.577494	0.240533	0.340563	0.550383	0.344696
ENSMUSG00000057246	BC051142	-1.0111	0.00203886	0.0327136	2.91049	3.24971	2.8281	2.03078	2.56873	1.24341	0.828908	0.792856
ENSMUSG00000022340	Sybu	-1.01197	0.0312684	0.221146	0.459272	0.180606	0.430305	0.261305	0.106436	0.153091	0.226148	0.174318
ENSMUSG00000069265	Hist1h3a	-1.0224	0.000582111	0.0125913	5.24063	5.77828	9.82865	5.91952	2.5765	3.09525	3.88566	3.62512
ENSMUSG00000027765	P2ry1	-1.03362	3.94091e-07	3.27814e-05	2.08843	1.83803	2.74835	1.78956	0.917319	0.931694	1.01267	1.27305
ENSMUSG00000029828	4921507P07Rik	-1.03603	0.00249211	0.0379939	0.941462	1.44174	0.821249	1.14318	0.552275	0.430279	0.361059	0.783902
ENSMUSG00000021209	Ppp4r4	-1.04306	0.0216762	0.175564	0.529483	0.518938	0.492667	0.318973	0.205096	0.436825	0.0541497	0.217044
ENSMUSG00000070423	Olfr558	-1.04464	0.0293593	0.212868	0.299083	0.413383	0.421444	0.249472	0.185086	0.129411	0.164699	0.188614
ENSMUSG00000016386	Mpped2	-1.04674	3.252e-06	0.000197439	2.26002	1.78565	2.0143	2.28641	0.988145	1.18836	0.728562	1.15803
ENSMUSG00000101959	Ldhal6b	-1.0604	0.000210315	0.00567228	3.4376	4.90343	2.53408	2.23131	1.81773	1.68854	1.23789	1.53813
ENSMUSG00000047515	BC049715	-1.06621	0.0120319	0.117625	0.391557	0.433276	0.385632	0.319583	0.304846	0.0426293	0.129175	0.245936
ENSMUSG00000034450	Gulo	-1.07103	0.00756068	0.0851097	1.51487	1.3635	1.51022	0.446985	0.386894	0.486925	0.537493	0.887102
ENSMUSG00000037020	Wdr62	-1.07517	3.1823e-07	2.73343e-05	1.70211	2.13319	1.57437	1.2066	0.852561	0.874899	0.705294	0.706743
ENSMUSG00000078439	Smim24	-1.07706	0.000596018	0.0128407	6.26639	7.58666	5.27332	5.46267	5.46966	1.65875	2.11106	2.34205
ENSMUSG00000091411	Gm5916	-1.09185	8.40016e-11	1.91483e-08	35.9614	45.3324	76.1527	46.1144	22.7811	23.5021	23.0563	25.8661
ENSMUSG00000037716	Ccdc33	-1.09464	0.0267079	0.200623	0.53869	0.36664	0.626542	0.344802	0.441402	0.101005	0.114773	0.207017
ENSMUSG00000020712	Tcam1	-1.10951	0.0086845	0.0934361	0.438386	0.699816	0.347645	0.342121	0.178122	0.246593	0.16303	0.265468
ENSMUSG00000015599	Ttbk1	-1.1278	0.0159783	0.14414	0.133247	0.313679	0.150419	0.106241	0.112101	0.0793604	0.0801589	0.0481942
ENSMUSG00000047654	Tssk6	-1.12958	0.00303146	0.0439015	1.20534	2.0117	1.18858	2.60459	0.749526	0.766444	0.643144	1.07411
ENSMUSG00000043036	Ccdc63	-1.13258	0.0413369	0.264618	0.178438	0.267183	0.168624	0.134369	0.132919	0.100371	0.0456215	0.0609538
ENSMUSG00000053297	AI854703	-1.15392	0.00925315	0.0975175	0.422789	0.285254	0.465014	0.332215	0.262905	0.1034	0.131594	0.169541
ENSMUSG00000034362	Csta1	-1.16094	0.00461065	0.0601567	0.729037	0.472238	0.548231	0.47705	0.202245	0.282817	0.231386	0.283387
ENSMUSG00000021414	Fam217a	-1.17125	9.67207e-06	0.000469869	2.56315	1.68901	2.0072	1.68447	0.755046	1.1141	0.982991	0.686523
ENSMUSG00000022236	Ropn1l	-1.17226	0.000393283	0.00922212	3.36287	4.77666	2.29576	3.10487	1.89511	1.80938	0.897176	1.42345
ENSMUSG00000028185	Dnase2b	-1.17798	1.64405e-05	0.000724452	3.38738	5.95882	5.65968	1.97785	2.25931	1.78815	1.86536	1.52206
ENSMUSG00000001076	C1ql4	-1.19846	5.8372e-08	6.46647e-06	8.16495	8.8261	6.6336	6.36544	2.93373	3.69225	3.76578	2.70709
ENSMUSG00000037568	Vash2	-1.20026	0.0457052	0.280351	0.0867589	0.269265	0.181634	0.329273	0.124085	0.0390416	0.0887274	0.124474
ENSMUSG00000033752	Mnd1	-1.20516	0.0444556	0.276616	0.479742	1.11016	0.83697	1.08378	0.357363	0.179904	0.572398	0.409696
ENSMUSG00000022622	Acr	-1.20524	0.0447953	0.277637	0.790798	0.911821	0.324623	0.462384	0.291071	0.418659	0.047573	0.333696
ENSMUSG00000010122	Slc47a1	-1.21463	0.0132793	0.126736	0.187378	0.803453	0.980715	0.465634	0.27218	0.395252	0.167676	0.216027
ENSMUSG00000044006	Cilp2	-1.21813	3.23746e-05	0.0012686	1.92989	1.86761	2.50397	1.33358	0.405907	0.620322	1.2605	0.980555
ENSMUSG00000052430	Bmpr1b	-1.22069	0.000403497	0.00942433	5.08794	5.03147	6.36647	4.44399	3.53088	2.69275	1.23062	1.54144
ENSMUSG00000028926	Cdk14	-1.22569	2.42366e-11	6.11252e-09	5.54804	7.69652	8.27955	8.30651	4.29079	3.48793	1.98865	3.02395
ENSMUSG00000024223	Armc12	-1.22795	0.00498709	0.0630554	1.55041	1.84666	1.23974	0.99238	0.80844	0.726758	0.52853	0.33101
ENSMUSG00000035165	Kcne3	-1.22886	0.0342191	0.234158	0.740343	0.906997	0.461293	0.382285	0.330892	0.29746	0.162244	0.270963
ENSMUSG00000030898	Cckbr	-1.23073	0.0259721	0.197347	0.734157	0.399741	0.355786	0.270278	0.34028	0.0917698	0.111232	0.195056
ENSMUSG00000075272	Ttc30a2	-1.23722	0.0164889	0.146956	0.546806	0.799172	0.251045	0.390089	0.231529	0.291391	0.176593	0.147464
ENSMUSG00000085576	Dpy19l2	-1.24667	0.0362671	0.242671	0.4675	0.564436	0.195038	0.220408	0.25437	0.251536	0.0623618	0.04166
ENSMUSG00000090173	Fbxw10	-1.25123	0.0179945	0.155919	0.521485	0.988124	0.564073	0.24504	0.540733	0.117334	0.149329	0.149636
ENSMUSG00000047518	Slfnl1	-1.26765	0.000758328	0.0155516	1.11177	2.27007	1.28154	1.2558	0.638873	0.982732	0.446679	0.406906
ENSMUSG00000097075	D830044I16Rik	-1.27219	0.000201768	0.00548544	1.28022	1.66731	1.17712	1.12559	0.804156	0.544961	0.318471	0.496417
ENSMUSG00000026494	Kif26b	-1.28135	3.4114e-21	3.85115e-18	3.27702	2.51438	3.02282	2.13816	1.20538	1.13348	1.03039	1.1368
ENSMUSG00000063409	Lrrc43	-1.286	0.0424649	0.268672	0.376142	0.474777	0.417599	0.216297	0.275097	0.115407	0.0349706	0.175212
ENSMUSG00000024430	Cabyr	-1.29027	0.00591613	0.0710505	1.37889	1.23345	0.486858	1.00868	0.586941	0.221608	0.167878	0.706539
ENSMUSG00000055409	Nell1	-1.29223	4.18664e-05	0.0015388	1.09961	1.20896	0.571831	0.477712	0.359146	0.249791	0.367643	0.390069
ENSMUSG00000020151	Ptprr	-1.29891	0.0486029	0.2906	0.212652	0.252626	0.269816	0.104814	0.0172806	0.108743	0.158165	0.0594337
ENSMUSG00000021590	Spata9	-1.30516	0.00604255	0.0720278	0.926654	1.24337	1.55893	1.01679	0.709994	0.446781	0.47384	0.271322
ENSMUSG00000061923	Odf1	-1.31124	2.817e-05	0.00112618	6.20481	6.41218	3.36903	8.98245	3.45236	3.13407	1.61877	1.94652
ENSMUSG00000013523	Bcas1	-1.31318	0.000131132	0.00387885	2.1567	1.4711	2.06738	0.642484	0.487259	0.799877	0.630181	0.631476
ENSMUSG00000026894	Morn5	-1.32625	0.018204	0.15716	2.05772	2.24082	2.22235	1.32816	1.75178	0.22047	0.20042	0.903742
ENSMUSG00000020096	Tbata	-1.3268	0.00537626	0.0661416	0.836204	1.55563	1.41834	0.88156	0.955105	0.36584	0.190039	0.333252
ENSMUSG00000027296	Itpka	-1.33055	9.18622e-06	0.000450886	1.80871	1.76011	1.71204	1.39099	0.584794	0.735992	0.74777	0.591558
ENSMUSG00000028141	Oaz3	-1.33507	0.00234837	0.0365308	3.4128	6.43626	2.46281	7.73784	2.912	1.64047	1.52301	1.93947
ENSMUSG00000022304	Dpys	-1.3365	7.05012e-06	0.000361769	2.43989	2.433	5.22187	1.9484	0.836891	1.18094	1.36368	1.36649
ENSMUSG00000036928	Stag3	-1.35557	1.04637e-05	0.000498225	0.53944	0.966829	0.69277	0.920752	0.281283	0.219148	0.337138	0.383898
ENSMUSG00000078796	Zfp541	-1.3661	0.000534509	0.0117766	0.387166	0.726118	0.375256	0.298026	0.192269	0.177452	0.146648	0.17634
ENSMUSG00000046196	Ttc39d	-1.37452	0.000847372	0.0168445	1.03308	1.80469	0.450584	1.03725	0.48738	0.419689	0.381521	0.382305
ENSMUSG00000047104	Pbp2	-1.38139	0.00871881	0.0935703	0.711111	1.16158	0.715744	1.18631	0.293379	0.738463	0.167826	0.280285
ENSMUSG00000047502	Mroh7	-1.40375	0.00518751	0.0650002	0.305864	0.341846	0.238724	0.290936	0.172679	0.0362208	0.0658535	0.164972
ENSMUSG00000052981	Ube2ql1	-1.40531	0.0233843	0.18436	0.183148	0.21369	0.410817	0.496496	0.210489	0.117738	0.10703	0.0536252
ENSMUSG00000097789	Gm2115	-1.4232	0.0480493	0.289187	0.069417	0.0566953	0.121107	0.0716887	0.0354577	0.0111563	0.0202834	0.0508128
ENSMUSG00000055891	Ubl4b	-1.4253	0.0341986	0.234158	0.353091	0.700356	0.220004	1.00278	0.270535	0.170241	0.103172	0.310152
ENSMUSG00000062859	Tcp11	-1.43531	4.93657e-06	0.000271384	4.19633	7.68982	3.87584	5.32148	3.53041	1.6662	0.901585	1.69846
ENSMUSG00000074771	Ankef1	-1.43702	0.000183595	0.00508467	1.50219	2.02077	0.809353	0.758565	0.789878	0.422493	0.316292	0.339581
ENSMUSG00000056509	Gm9999	-1.45036	0.00319466	0.0456515	3.16702	3.17449	3.01378	1.82116	0.900762	1.45755	0.294444	1.47524
ENSMUSG00000058183	Mmel1	-1.45332	0.0357095	0.240434	0.143024	0.272563	0.145555	0.280022	0.127847	0.080451	0.0487563	0.0488565
ENSMUSG00000028287	1700009N14Rik	-1.46262	0.000508056	0.0113094	1.16789	1.81688	1.30985	1.25637	0.596553	0.688225	0.227503	0.512935
ENSMUSG00000029279	Brdt	-1.46465	0.000303205	0.00756916	0.368611	0.98747	0.4373	0.492973	0.276778	0.265401	0.120632	0.16621
ENSMUSG00000001558	Klhl10	-1.47579	0.0025934	0.0390156	1.42214	1.55813	0.484118	2.03735	0.682127	0.468267	0.10642	0.746472
ENSMUSG00000049008	BB014433	-1.47839	0.00523162	0.0652075	0.598651	0.912688	0.452583	0.577026	0.356752	0.134697	0.244894	0.163598
ENSMUSG00000056508	1700001K19Rik	-1.48089	0.0496585	0.294494	1.2454	0.418833	0.191714	0.860592	0.130971	0.412083	0.224764	0.225226
ENSMUSG00000025347	Mettl7b	-1.48925	0.00668818	0.0778001	1.19448	0.650383	1.38928	0.719582	0.660977	0.319951	0.116341	0.291451
ENSMUSG00000010796	Asz1	-1.49131	0.00255521	0.0386328	0.686198	0.58481	0.676655	0.377435	0.0800067	0.201385	0.335628	0.21402
ENSMUSG00000037437	Adam32	-1.49688	5.4849e-05	0.00191503	1.28502	2.07573	0.772205	1.03217	0.510519	0.289131	0.496468	0.526752
ENSMUSG00000039224	D1Pas1	-1.49857	0.0314396	0.221734	0.239597	0.782751	0.171003	0.295239	0.0584109	0.367565	0.0445516	0.0669647
ENSMUSG00000064272	Gpbar1	-1.50342	0.0161969	0.145189	0.455569	0.850468	0.624484	0.823336	0.349053	0.21965	0.133116	0.266779
ENSMUSG00000036805	Noxa1	-1.50822	0.0191832	0.162247	0.475935	0.388713	0.603875	0.273682	0.154703	0.0973505	0.221242	0.133018
ENSMUSG00000022432	Smc1b	-1.52159	0.011477	0.113625	0.311175	0.691846	0.226201	0.249945	0.216343	0.175036	0	0.124012
ENSMUSG00000000365	Rnf17	-1.5409	0.00125904	0.0226862	0.199361	0.455911	0.208686	0.324269	0.154446	0.0747605	0.0679614	0.108962
ENSMUSG00000054003	Tdrd9	-1.55442	0.00464459	0.0604001	0.203675	0.34458	0.139597	0.21034	0.078027	0.0491004	0.0595132	0.119271
ENSMUSG00000078907	Fam186b	-1.55691	0.0065811	0.0769004	0.351239	0.519951	0.191494	0.238044	0.0981152	0.0987862	0.0673516	0.179973
ENSMUSG00000046782	Ttc6	-1.55854	0.00791481	0.0875578	0.205701	0.266828	0.0949951	0.10934	0.0757126	0.0408377	0.0494983	0.0620001
ENSMUSG00000026420	Il24	-1.56221	0.0136672	0.129242	0.947038	1.11188	0.722849	0.213944	0.317455	0.266355	0.181598	0.242629
ENSMUSG00000038057	Dbil5	-1.56251	1.91767e-06	0.000127345	6.02086	8.75307	3.88653	7.07285	2.36807	2.57392	1.60094	2.22125
ENSMUSG00000036574	Tex44	-1.5661	0.0287228	0.209711	0.689884	0.596598	0.141599	0.440049	0.362753	0.0913085	0.0830044	0.083175
ENSMUSG00000031620	Iqcm	-1.57089	0.0468538	0.284209	0.171898	0.224632	0.359877	0.341732	0.184389	0.0386771	0	0.140928
ENSMUSG00000029867	Llcfc1	-1.58094	0.0275246	0.204554	1.22741	2.62185	1.15305	0.341271	0.759578	0.531092	0	0.483785
ENSMUSG00000069805	Fbp1	-1.58403	5.52735e-06	0.000297136	3.40588	4.05665	3.25984	1.92354	1.86051	1.06434	0.532149	0.727149
ENSMUSG00000031970	Dbndd1	-1.60834	0.000158555	0.00453968	2.0025	1.77181	1.96516	1.20635	1.23063	0.328536	0.255992	0.427531
ENSMUSG00000037747	Phyhipl	-1.61334	0.00176407	0.0294513	0.421581	0.623056	0.367751	0.344674	0.269176	0.135509	0.0205308	0.144011
ENSMUSG00000021940	Ptpn20	-1.62143	0.00538088	0.0661459	0.510351	0.416822	0.154847	0.401018	0.218181	0.0998514	0.113463	0.0454785
ENSMUSG00000070280	Slc22a14	-1.62335	0.00575276	0.0699029	0.505828	0.49059	0.496396	0.25711	0.226077	0.142265	0.0323316	0.16199
ENSMUSG00000073730	4933415F23Rik	-1.62573	0.000740086	0.0153103	1.41418	2.40627	0.411201	1.84585	0.4916	0.57451	0.241044	0.684361
ENSMUSG00000031849	Comp	-1.6269	0.00385379	0.0526581	0.289579	0.733181	0.277864	0.837357	0.232967	0.228044	0.0888449	0.148379
ENSMUSG00000051618	Ubqln3	-1.63054	0.00149484	0.025714	0.618355	1.4189	0.488027	0.691806	0.500098	0.0993787	0.271022	0.150877
ENSMUSG00000052271	Bhlha15	-1.63214	0.00738053	0.0834781	0.320377	0.16354	0.593872	0.235222	0.0894943	0.0225266	0.122867	0.18468
ENSMUSG00000026601	Axdnd1	-1.63578	0.000745254	0.0153471	0.526767	0.701114	0.340374	0.246817	0.209276	0.109743	0.0997627	0.159948
ENSMUSG00000053550	Shisa7	-1.63651	0.00835139	0.0906531	0.116488	0.104653	0.15242	0.494732	0.0624761	0.0917341	0.0357392	0.0955003
ENSMUSG00000036168	Ccdc38	-1.6543	0.00104863	0.0197771	0.325318	1.34412	0.400629	0.397722	0.290798	0.172227	0.176135	0.137275
ENSMUSG00000024207	Acsbg2	-1.67151	0.000474285	0.0107084	0.5095	0.61324	0.421052	0.508865	0.191763	0.0905035	0.19197	0.164884
ENSMUSG00000046750	Selenov	-1.67323	0.00690285	0.079517	0.828284	0.766688	0.52985	0.498977	0.345517	0.124243	0.112944	0.226352
ENSMUSG00000066720	Cldn9	-1.67798	0.0491419	0.292495	0.146263	0.278736	0.467819	0.484617	0.174324	0	0.0498605	0.199852
ENSMUSG00000029766	1700012A03Rik	-1.68807	0.00785188	0.0871871	0.581204	0.830708	0.697113	1.37864	0.389649	0.163464	0.371494	0.148903
ENSMUSG00000064036	Mro	-1.69303	0.0277966	0.20548	0.286993	0.599015	0.0834491	0.259336	0.114018	0.0358742	0.0652232	0.163393
ENSMUSG00000049653	Spatc1	-1.69846	0.0292032	0.211848	0.479493	0.854442	0.152097	0.669625	0.467578	0.0490392	0.0891586	0.0446709
ENSMUSG00000035211	Xrra1	-1.70319	0.000142552	0.00411628	0.614829	1.25538	0.62571	0.787072	0.457991	0.172921	0.104796	0.26253
ENSMUSG00000029248	Thegl	-1.70552	0.00601729	0.0719011	0.81399	1.13018	0.177513	0.625217	0.363808	0.137361	0.166492	0.166834
ENSMUSG00000026650	Meig1	-1.71358	0.0095917	0.10004	6.54039	12.1404	3.71707	4.20873	4.42908	1.33781	0.608072	1.72641
ENSMUSG00000033987	Dnah17	-1.71825	2.01481e-05	0.000859085	0.336425	0.62205	0.236405	0.211115	0.0918887	0.0367966	0.114686	0.18196
ENSMUSG00000040866	Rsph6a	-1.73409	0.0192638	0.162696	0.208045	0.849587	0.129628	0.214853	0.0797009	0.0668716	0.151975	0.12183
ENSMUSG00000036463	4930544G11Rik	-1.74411	0.0222356	0.17863	0.547359	1.62563	0.0868123	0.629506	0.177919	0.39186	0.0508889	0.254968
ENSMUSG00000002076	Hsf2bp	-1.7452	0.0459101	0.281166	0.146416	0.199305	0.170294	0.0661532	0.0218133	0.027453	0.0499127	0.0750229
ENSMUSG00000000411	Tssk3	-1.74898	0.00314232	0.0450257	0.710556	0.937466	0.524469	0.592692	0.244291	0.184472	0.167695	0.224053
ENSMUSG00000039335	Spata16	-1.75255	0.00442028	0.0582611	0.449808	0.960825	0.36219	0.687858	0.247433	0.350332	0	0.141834
ENSMUSG00000035435	Abca17	-1.76006	0.0470573	0.285098	0.0789495	0.247177	0.0229562	0.154573	0.011762	0.0740153	0	0.0674223
ENSMUSG00000027938	Creb3l4	-1.76133	0.00119988	0.021898	0.720797	0.919846	0.668058	0.85488	0.442965	0.202725	0.046072	0.230833
ENSMUSG00000029784	Ssmem1	-1.76321	0.00133742	0.0237144	0.73095	1.23663	0.500985	0.896409	0.326694	0.234949	0.213581	0.21402
ENSMUSG00000071322	Tcp10a	-1.76751	0.0177994	0.154909	0.324275	0.794542	0.117862	0.146513	0.120778	0.0304009	0.165816	0.0830786
ENSMUSG00000051054	1700014D04Rik	-1.76996	0.043252	0.271876	0.108267	0.159167	0.094443	0.156535	0.0387116	0.0487205	0	0.0665709
ENSMUSG00000007907	Cabs1	-1.77015	0.000313428	0.00778057	1.53406	4.44218	0.811018	2.4364	1.12196	0.679869	0.237707	0.666948
ENSMUSG00000059891	Tsks	-1.77315	0.000589709	0.0127325	1.1768	1.61222	0.463596	0.857575	0.407197	0.170826	0.116467	0.505729
ENSMUSG00000079324	4932414N04Rik	-1.77608	0.00988164	0.102478	0.153553	0.689766	0.117203	0.277511	0.154416	0.107967	0.0196296	0.0786797
ENSMUSG00000049123	Catsperg2	-1.79228	0.00726905	0.0824928	0.204155	0.384787	0.068495	0.212863	0.0842271	0.0883366	0.0160606	0.0643743
ENSMUSG00000041247	Lamp3	-1.79296	0.0431282	0.271276	0.188352	0.170927	0.0547673	0.0945564	0.056122	0.0470882	0.0214029	0.0214469
ENSMUSG00000012211	Tex22	-1.79497	0.00318352	0.0455197	0.717846	1.08238	0.481682	0.648671	0.0987192	0.310607	0.169415	0.282939
ENSMUSG00000040838	Gm11639	-1.80537	0.000297675	0.00747562	0.134657	0.168204	0.0587316	0.0751559	0.0566441	0.0222779	0.0162015	0.0284109
ENSMUSG00000051314	Ffar2	-1.81592	2.02261e-06	0.000132825	8.45265	6.70492	10.6357	3.24207	2.39174	1.64189	2.5187	1.62027
ENSMUSG00000027517	Ankrd60	-1.8239	0.00990641	0.1026	1.03266	1.47596	0.450399	0.40825	0.519232	0.145218	0.198016	0.066141
ENSMUSG00000033213	AA467197	-1.82424	0.027357	0.203691	1.06004	1.65939	0.231171	0.63859	0.0789629	0.695651	0.0903407	0.181053
ENSMUSG00000110333	Gm45861	-1.82566	6.19823e-10	1.13032e-07	1.07125	1.44761	1.55461	0.580811	0.443968	0.361548	0.219111	0.279442
ENSMUSG00000009115	Spatc1l	-1.82998	0.0405579	0.261731	0.525243	0.257391	0.274906	0.284777	0	0.11818	0.0537161	0.215306
ENSMUSG00000020591	Ntsr2	-1.83391	0.000170805	0.00482055	0.964299	0.994835	1.30603	0.412756	0.362937	0.0856452	0.103808	0.468097
ENSMUSG00000030206	Gsg1	-1.83912	4.02092e-06	0.000233637	4.5137	5.28933	2.65344	4.56641	2.67521	0.551949	0.652277	0.854731
ENSMUSG00000008482	Rnf151	-1.84568	0.0156581	0.141953	0.647255	0.240289	0.461953	0.744395	0.210391	0.0661967	0.0601764	0.241201
ENSMUSG00000027927	Lelp1	-1.84958	0.0032752	0.0465219	1.14291	1.40018	0.712125	1.10654	0.583791	0.183682	0.333955	0.0836603
ENSMUSG00000087279	4930544D05Rik	-1.85686	0.00815006	0.0895336	1.31673	0.501864	0.918882	0.79323	0.31387	0.296266	0.269322	0.0899584
ENSMUSG00000110622	Gm16486	-1.86606	7.8767e-06	0.000398151	0.534181	0.772847	0.426032	0.496496	0.190999	0.188871	0.0312172	0.203329
ENSMUSG00000026567	Adcy10	-1.86683	0.000523093	0.0115897	0.326634	0.656673	0.263009	0.397327	0.269515	0.0989325	0.0256957	0.0514971
ENSMUSG00000024973	Hrasls5	-1.87266	0.000139197	0.00403908	1.90866	3.54778	1.26307	2.08158	0.882483	0.370216	0.134619	1.01171
ENSMUSG00000058935	Tex48	-1.88388	0.0376244	0.249221	0.516709	1.18164	0.180293	0.840449	0.0923761	0.348779	0.105687	0.211808
ENSMUSG00000026401	Cd55b	-1.88492	0.0112511	0.112144	0.633622	0.905628	0.276358	0.477135	0.330393	0.118804	0	0.162333
ENSMUSG00000079652	Fam71f2	-1.89272	0.000490109	0.0109717	0.889353	2.61492	0.827513	1.76803	0.529988	0.200105	0.181906	0.729121
ENSMUSG00000029320	1700016H13Rik	-1.89487	0.00240079	0.0371028	0.3868	1.34263	0.590468	0.742742	0.302536	0.326363	0.049447	0.148646
ENSMUSG00000028314	Toporsl	-1.89763	0.0194632	0.163913	0.129608	0.825673	0.180894	0.187389	0.185368	0.0583237	0	0.106257
ENSMUSG00000033368	Trim69	-1.90349	0.00509129	0.0640254	0.470863	0.576856	0.308055	0.390031	0.175375	0.0441435	0.0401289	0.201057
ENSMUSG00000017832	Hspb9	-1.90529	0.000138247	0.00402138	2.79464	5.35203	1.26093	2.17701	0.775272	0.433652	0.788428	1.08632
ENSMUSG00000049694	BC048671	-1.91053	0.0415744	0.265366	0.346349	0.565751	0.302124	0.104324	0.103199	0.129881	0.0590345	0.0591558
ENSMUSG00000024905	Tesmin	-1.91657	0.00265087	0.0396493	0.706071	0.401164	0.294568	0.332885	0.137206	0.0690723	0.0313953	0.220219
ENSMUSG00000084234	4933405O20Rik	-1.91695	0.0203571	0.168449	0.260859	0.72438	0.227551	0.518587	0.233179	0	0.106711	0.10693
ENSMUSG00000062017	Abca14	-1.92182	0.0104119	0.106532	0.103956	0.371458	0.113353	0.0939382	0.0929251	0.0438566	0.039868	0
ENSMUSG00000028813	CK137956	-1.92314	0.00620618	0.0734302	0.301692	0.640647	0.131585	0.299881	0.107872	0.0678809	0.0925612	0.0927514
ENSMUSG00000031085	Gm498	-1.93469	0.0190572	0.161642	0.405472	0.692433	0.0964632	0.199854	0.164749	0.0414689	0.113092	0.037775
ENSMUSG00000057710	9630041A04Rik	-1.94746	0.00528512	0.0653962	0.781994	0.468367	0.955001	0.376873	0.326207	0	0.213263	0.106851
ENSMUSG00000078577	Tmco2	-1.9477	0.0351653	0.237981	0.389221	1.03314	0.424403	0.439641	0.08698	0.109469	0.298539	0.0997175
ENSMUSG00000030230	Plcz1	-1.95497	0.000363136	0.00866847	0.554524	1.18257	0.295605	0.695954	0.247841	0.138631	0.0945176	0.220994
ENSMUSG00000078627	44265	-1.9577	6.59492e-07	5.14295e-05	1.04693	2.32355	0.833839	0.884346	0.386543	0.435275	0.209482	0.279884
ENSMUSG00000061099	Gapdhs	-1.95802	7.03418e-10	1.25383e-07	3.40929	6.00037	2.76453	4.51265	1.33061	0.540205	0.982152	1.42705
ENSMUSG00000026609	Ush2a	-1.9621	0.0263725	0.19906	0.0312034	0.0655326	0.0116653	0.0322245	0.0119539	0.0200594	0.00455876	0
ENSMUSG00000025808	Ccdc7a	-1.967	0.0025409	0.0385051	0.126195	0.25767	0.165122	0.0912272	0.0564021	0.014197	0.0387174	0.0517293
ENSMUSG00000109561	Ankrd31	-1.96706	0.0102105	0.104788	0.131351	0.14629	0.0624978	0.118693	0.0533697	0.0134337	0	0.0489482
ENSMUSG00000090843	Heatr4	-1.97585	0.0479641	0.288747	0.184233	0.206896	0.0602657	0.104049	0.0411709	0.103631	0	0
ENSMUSG00000023930	Crisp2	-1.98384	0.000467779	0.0106	4.81661	9.65592	2.80106	4.96795	2.52242	0.821014	0.597078	1.6952
ENSMUSG00000061525	4921509C19Rik	-1.98799	0.0341027	0.23373	0.156399	0.212894	0.0682143	0.188436	0.046601	0.0879745	0	0.0267127
ENSMUSG00000051920	Rspo2	-1.99032	0.0489261	0.29165	0.0628781	0.0513548	0.201114	0.246215	0.0936768	0	0.0428699	0
ENSMUSG00000043410	Hfm1	-1.991	0.0362986	0.242814	0.0557692	0.182195	0.0729722	0.0881911	0.0249257	0.0784256	0	0
ENSMUSG00000072487	Mroh5	-1.99244	0.0485973	0.2906	0.140446	0.131094	0.0525057	0.0725213	0.0358696	0	0.020519	0.0411224
ENSMUSG00000024064	Galnt14	-2.00005	2.4847e-14	1.11141e-11	5.8029	4.89232	10.9607	4.46138	2.02884	1.86898	0.981118	1.63056
ENSMUSG00000020286	1700093K21Rik	-2.00088	0.00187138	0.0305964	0.636022	0.909058	0.647278	0.383154	0.142133	0.178882	0.108409	0.217263
ENSMUSG00000026331	Slco6c1	-2.00246	0.0037337	0.0514622	0.152812	0.624035	0.19995	0.345215	0.113831	0.0859569	0.0260465	0.1044
ENSMUSG00000021086	Ccdc175	-2.00748	0.0365537	0.244011	0.400243	0.217928	0.0465515	0.168781	0.095406	0	0	0.109377
ENSMUSG00000108929	Cc2d2b	-2.0114	0.0144202	0.133957	0.249761	0.491973	0.0384476	0.0929322	0.0919299	0.0330567	0	0.0903362
ENSMUSG00000059114	Lrrc74a	-2.01387	0.0139326	0.131176	0.397719	0.472482	0.346935	0.196032	0.226238	0	0	0.111158
ENSMUSG00000022155	Mroh2b	-2.01664	2.48969e-06	0.000158664	0.796838	1.31345	0.404417	0.720051	0.310815	0.130392	0.0740835	0.282096
ENSMUSG00000020401	Fam71b	-2.026	0.0101223	0.104153	0.288175	0.549179	0.111724	0.231471	0.0858654	0.0720438	0.0982377	0.0328132
ENSMUSG00000047025	Ccer1	-2.04058	0.00438424	0.058033	0.67524	0.520855	0.19634	0.440679	0.167664	0.0844052	0	0.192217
ENSMUSG00000040985	Sun3	-2.04093	0.0252045	0.194127	0.580601	0.663877	0.202586	0.20986	0.207597	0.0653178	0.118755	0
ENSMUSG00000074768	Bhmt	-2.04266	0.00771748	0.086098	0.141231	0.158604	0.153997	0.127621	0.0473419	0.0198607	0.0180545	0.0542747
ENSMUSG00000053896	4933409G03Rik	-2.04589	0.00478767	0.0615732	0.553938	0.950085	0.483207	0.300335	0.198064	0.0623182	0.169952	0.113534
ENSMUSG00000046846	Spesp1	-2.05254	0.00112708	0.0208585	0.459976	0.920414	0.240746	0.24939	0.226142	0.0258737	0.0940826	0.094276
ENSMUSG00000024815	Trpd52l3	-2.05444	0.0335005	0.230871	0.125437	0.358571	0.136775	0.141686	0.112127	0	0.0320707	0.0321367
ENSMUSG00000017049	Ccdc70	-2.07024	0.0440702	0.275375	0.265512	1.03005	0.115805	0.239926	0.178004	0.0746754	0	0.136047
ENSMUSG00000026163	Sphkap	-2.07341	0.0235191	0.185001	0.0257404	0.266293	0.0299382	0.0542731	0.0153394	0.057916	0.00877481	0.00879285
ENSMUSG00000023467	Tulp2	-2.08754	1.98075e-08	2.5111e-06	1.46229	2.14975	0.992112	1.26265	0.319519	0.40213	0.365559	0.299708
ENSMUSG00000027703	Lrriq4	-2.08802	0.0484845	0.290405	0.146549	0.191507	0.0511345	0.238368	0.0523993	0.0989207	0	0
ENSMUSG00000047674	Pdha2	-2.09639	0.039439	0.256933	0.0892378	0.485891	0.155686	0.161277	0.0265895	0	0	0.1829
ENSMUSG00000020636	Allc	-2.10412	6.17178e-05	0.00208613	0.932832	1.82851	0.650977	0.96938	0.375232	0.157416	0.1431	0.334585
ENSMUSG00000028610	Dmrtb1	-2.1066	5.99196e-06	0.000316373	1.01504	1.96508	0.62308	1.12105	0.268839	0.211467	0.346023	0.269682
ENSMUSG00000041138	Nme8	-2.12417	0.000560159	0.0122506	0.52752	0.753979	0.230081	0.506479	0.117886	0.0741827	0.134872	0.13515
ENSMUSG00000044526	Znrf4	-2.13113	0.000167234	0.00474237	0.735851	1.61807	0.79002	1.63678	0.252988	0.573116	0.115776	0.174022
ENSMUSG00000033826	Dnah8	-2.13204	4.56193e-05	0.0016562	1.14661	3.02494	0.78677	1.00577	0.446	0.329231	0.161911	0.422816
ENSMUSG00000030994	D7Ertd443e	-2.143	0.0224361	0.179815	0.16841	0.255444	0.12592	0.108701	0	0.081198	0	0.0739651
ENSMUSG00000092305	Prps1l1	-2.1465	0.0101624	0.104475	0.542668	1.12509	0.145654	0.188605	0.186571	0	0.0853816	0.171114
ENSMUSG00000030638	Sh3gl3	-2.14923	0.00304075	0.0440092	0.627778	1.05394	0.273809	0.22061	0.0935273	0	0.142672	0.250188
ENSMUSG00000091311	Spata31d1b	-2.1493	0.000855824	0.0169357	0.277434	0.413195	0.17083	0.206458	0.116704	0.0367193	0	0.0836213
ENSMUSG00000022619	Mapk8ip2	-2.16031	0.0129163	0.123871	0.0881139	0.113089	0.0768628	0.113747	0.033756	0	0.0514932	0
ENSMUSG00000050089	Akap4	-2.16399	4.82426e-05	0.00172762	2.89484	4.80429	1.53532	2.99256	1.38699	0.416857	0.449999	0.474657
ENSMUSG00000038523	1700003F12Rik	-2.1644	0.00781446	0.0870162	1.19254	1.94798	0.173378	1.07762	0.444166	0.111801	0.3049	0.101842
ENSMUSG00000070568	Slc6a21	-2.17298	0.000258382	0.00670915	0.690256	0.845636	0.215043	0.467804	0.198325	0.194135	0.0252113	0.0757895
ENSMUSG00000027606	Dnajc5b	-2.17796	0.0256853	0.196237	0.405579	1.2698	0.117931	0.305413	0.241695	0	0.13826	0.0692723
ENSMUSG00000056987	Fam71d	-2.1784	8.03087e-05	0.00258906	0.947572	2.45073	0.516612	1.28439	0.317634	0.35534	0.040378	0.445071
ENSMUSG00000027793	Ccna1	-2.17974	0.00124751	0.0225417	0.569793	0.731296	0.319524	0.404552	0.181904	0.091574	0.124869	0.0417085
ENSMUSG00000078632	Lrrc37a	-2.18145	0.000276146	0.00705451	0.137793	0.183618	0.0948934	0.0786405	0.0259308	0.00815879	0.0222504	0.0520243
ENSMUSG00000029678	Hyal5	-2.18656	0.0220833	0.177648	0.135193	0.276043	0.117931	0.24433	0.0302119	0.0380231	0.0345651	0.0692723
ENSMUSG00000063447	Ube2d2b	-2.19545	0.000670552	0.0141556	0.833878	1.29401	0.290961	0.489789	0.0745395	0.0938116	0.2132	0.256365
ENSMUSG00000027855	Sycp1	-2.19614	0.00667781	0.0777373	0.284979	0.498756	0.213078	0.0919704	0.12737	0	0	0.104302
ENSMUSG00000007107	Atp1a4	-2.19902	1.59656e-06	0.000110349	0.766159	1.61378	0.36934	0.728766	0.162204	0.249506	0.164956	0.185957
ENSMUSG00000031682	1700011L22Rik	-2.20051	0.0264113	0.199279	0.435451	0.711296	0.316541	0.196744	0.129748	0	0.0742218	0.148749
ENSMUSG00000031809	1700018B08Rik	-2.22488	0.0117507	0.115404	0.580869	0.421703	0.337799	0.466571	0.173077	0.145218	0	0.066141
ENSMUSG00000020317	Theg	-2.23156	0.0011242	0.0208378	0.726756	0.553997	0.507167	0.481596	0.173237	0.0545069	0.0495497	0.198606
ENSMUSG00000040231	Syngr4	-2.23398	0.000769656	0.0157302	1.08525	0.70909	0.883565	0.784535	0.129346	0.244182	0.221975	0.148287
ENSMUSG00000046957	Spz1	-2.23626	1.88822e-09	2.90675e-07	3.82358	5.98547	1.94562	3.29059	1.30204	0.665714	0.418964	0.793004
ENSMUSG00000060913	Trim55	-2.24172	0.00561413	0.0683959	0.242644	0.198176	0.188144	0.267986	0.0481993	0.0606612	0	0.0828866
ENSMUSG00000073001	Cylc1	-2.24652	0.0427871	0.26999	0.106596	0.203142	0.18597	0.160539	0.0952848	0	0	0.0364128
ENSMUSG00000037689	Tmem247	-2.26565	0.0123192	0.119625	0.37214	1.44372	0.730401	0.504418	0.415815	0	0.095146	0.0953416
ENSMUSG00000032101	Ddx25	-2.27138	4.07779e-05	0.0015105	0.262334	0.403793	0.12322	0.182349	0.072153	0.022702	0.0722308	0.0310197
ENSMUSG00000070331	Qrich2	-2.27253	1.68069e-07	1.61552e-05	0.674569	1.51116	0.386686	0.522483	0.267038	0.173461	0.0591321	0.138258
ENSMUSG00000070708	Gtsf1l	-2.27546	0.00456065	0.0596686	1.44691	1.39029	0.96518	1.23057	0.912972	0	0	0.0872225
ENSMUSG00000072983	4933414I15Rik	-2.28025	0.00981787	0.102129	0.222002	0.932488	0.138325	0.200609	0.198445	0.035679	0	0.0650017
ENSMUSG00000050035	Fhl4	-2.29401	1.32613e-11	3.65566e-09	2.55007	5.76111	1.63247	2.65741	0.974293	0.508987	0.483729	0.590098
ENSMUSG00000031233	Pgk2	-2.29453	2.16298e-07	1.96466e-05	1.84574	3.08675	0.881702	1.62816	0.274981	0.395517	0.494377	0.360286
ENSMUSG00000072878	1700123L14Rik	-2.30099	1.23612e-06	8.8802e-05	1.68198	3.76142	1.15281	1.01326	0.429573	0.585691	0.163823	0.36936
ENSMUSG00000041566	Tssk1	-2.30402	0.0017729	0.0294742	0.264723	0.679512	0.164943	0.170866	0.118316	0	0.0193378	0.116265
ENSMUSG00000021056	Tex21	-2.31057	0.0243444	0.189286	0.327386	0.160433	0.114233	0.207086	0.0292647	0	0	0.134201
ENSMUSG00000072295	C2cd6	-2.31164	0.000397814	0.00931916	0.590954	1.60884	0.257748	0.326337	0.176082	0.110804	0.134303	0.134579
ENSMUSG00000024532	1700034E13Rik	-2.31647	0.0240676	0.187988	1.28502	1.63259	0.498197	0.258043	0.12763	0.481885	0.14602	0
ENSMUSG00000059343	Aldoart1	-2.31879	0.00081584	0.0164582	0.477326	0.556928	0.356895	0.308092	0.121908	0.0767133	0	0.13976
ENSMUSG00000018844	Fndc8	-2.31944	0.0297989	0.214651	0.129201	0.290189	0.112704	0.116751	0.0288729	0.0363379	0	0.0662021
ENSMUSG00000050623	Catsperz	-2.32021	0.000410244	0.00954432	1.43329	1.6096	1.17213	1.21422	0.080075	0.100778	0.183226	0.734411
ENSMUSG00000050114	Prdx6b	-2.32106	4.15193e-06	0.000238907	0.800263	1.2676	0.423079	0.547837	0.15174	0.109127	0.0744019	0.273368
ENSMUSG00000027719	Adad1	-2.33144	0.000528198	0.011681	0.248174	0.64493	0.216485	0.244645	0.100836	0.0253815	0.0461463	0.0924823
ENSMUSG00000068167	Csnka2ip	-2.33273	8.46374e-05	0.00268968	0.26918	0.759479	0.490965	0.464368	0.131246	0.165179	0	0.10031
ENSMUSG00000067028	Cntnap5b	-2.33789	0.0360671	0.241879	0.0868667	0.227031	0.015155	0.125593	0.0155298	0.0781802	0	0
ENSMUSG00000056018	Ccdc7b	-2.34679	0.0138857	0.130872	0.186691	0.838624	0.325706	0.0843501	0.0834404	0.0525069	0.0477317	0.0956596
ENSMUSG00000060445	Sycp2	-2.34766	3.15055e-05	0.0012407	0.342653	0.629678	0.245525	0.210108	0.12033	0.0963714	0	0.062705
ENSMUSG00000042708	Shcbp1l	-2.35198	0.000576376	0.012513	0.559699	0.986431	0.282661	0.266191	0.184324	0.132561	0	0.0905645
ENSMUSG00000031518	Spata4	-2.3533	4.14608e-06	0.000238907	2.5152	3.94634	1.15476	1.91396	0.650827	0.819098	0.135383	0.271322
ENSMUSG00000066368	Actl11	-2.36149	1.89684e-05	0.000817607	0.543159	0.973097	0.22926	0.522483	0.0626482	0.0591344	0.0716752	0.251379
ENSMUSG00000045521	Tssk2	-2.36289	6.04102e-05	0.00205178	1.4628	2.01867	0.352006	1.09394	0.315624	0.283734	0.103172	0.25846
ENSMUSG00000029788	Cpa5	-2.36358	0.0316639	0.222747	0.287911	0.235147	0.0837162	0.0578148	0.0285956	0	0.0654319	0.0327832
ENSMUSG00000040140	Tdrd6	-2.36973	5.93598e-11	1.42146e-08	0.92134	1.56971	0.648142	0.725128	0.318803	0.21176	0.091185	0.12183
ENSMUSG00000022602	Arc	-2.37028	0.0012661	0.0227734	0.664128	1.42151	5.67341	3.78702	1.00307	0.360691	0.281047	0.586717
ENSMUSG00000078442	Ccdc105	-2.37417	0.0329637	0.2285	0.367364	0.133351	0.142425	0.184424	0.109461	0	0.0417443	0
ENSMUSG00000062028	Irgc1	-2.37506	1.69186e-07	1.61729e-05	1.37256	3.67445	1.23056	2.37723	0.443053	0.128678	0.311934	0.781437
ENSMUSG00000019834	Slc22a16	-2.37821	0.00182527	0.0300503	0.215838	0.679948	0.268969	0.278627	0.110249	0.104065	0	0.0631969
ENSMUSG00000039342	Ankar	-2.38161	0.00189432	0.0308704	0.153057	0.412524	0.133514	0.0968154	0.068408	0.0516569	0	0.0313703
ENSMUSG00000040412	5330417C22Rik	-2.38653	5.88949e-05	0.00202645	0.25175	0.421017	0.188232	0.140827	0.085728	0.0539465	0.0367802	0.0122853
ENSMUSG00000016982	Pom121l2	-2.38662	9.63492e-05	0.00301339	0.519991	0.984521	0.268033	0.427165	0.190151	0.106362	0	0.12111
ENSMUSG00000008813	Tppp2	-2.38894	0.000134475	0.00394067	1.79149	1.61719	0.740245	2.21527	0.421419	0.106075	0.289285	0.386506
ENSMUSG00000070332	Trim80	-2.391	0.0154227	0.140541	0.2894	0.561363	0.126224	0.130756	0.129346	0	0	0.0741436
ENSMUSG00000045620	Odf3l1	-2.39324	0.0107519	0.108826	0.577248	0.518605	0.302124	0.365135	0.257998	0	0.0590345	0
ENSMUSG00000031727	Pmfbp1	-2.40046	1.55692e-06	0.000107924	0.709558	1.19216	0.265267	0.824375	0.181219	0.159651	0.0621992	0.166205
ENSMUSG00000029707	Fscn3	-2.40393	0.000164074	0.00466952	0.51497	1.26178	0.385042	0.698017	0.295924	0.0413816	0.112855	0.075391
ENSMUSG00000049649	Gpr3	-2.40958	0.0474541	0.286584	0.0833547	0.136158	0.0727114	0.150644	0.0248366	0	0.0568307	0
ENSMUSG00000050553	Gk2	-2.41652	1.27197e-05	0.000587811	1.00478	1.24616	0.811557	0.63893	0.399183	0.0837318	0.0380584	0.152547
ENSMUSG00000050685	Ccdc54	-2.43316	0.000345995	0.00836137	1.02568	2.38087	0.470903	1.17075	0.579061	0	0.110416	0.221287
ENSMUSG00000036377	C530008M17Rik	-2.43798	2.36284e-08	2.93277e-06	0.47511	0.932945	0.299811	0.474998	0.162649	0.125096	0.0413523	0.0725153
ENSMUSG00000027869	Hsd3b6	-2.43872	0.0181326	0.156658	0.310599	0.190258	0.169337	0.175417	0.0347051	0	0.0397058	0.0795748
ENSMUSG00000047441	Antxrl	-2.44531	0.00344076	0.0484095	0.331575	0.428782	0.0723093	0.224717	0.0493986	0.0310853	0.0565164	0.0566326
ENSMUSG00000072664	Ugt3a1	-2.45354	0.0233483	0.184138	0.0935326	0.280102	0.271966	0.0563462	0.0278693	0.0701496	0.0318849	0
ENSMUSG00000084897	Gm14226	-2.46716	0.0274919	0.204438	0.0431467	0.158578	0.0752748	0.194944	0.0192842	0	0	0.0663246
ENSMUSG00000092519	Actl9	-2.47062	6.65385e-07	5.155e-05	1.22294	1.83117	0.977888	1.33532	0.364391	0.229302	0.26056	0.104438
ENSMUSG00000045835	Hdgfl1	-2.47133	0.000553052	0.0121064	0.666977	0.716769	0.367461	0.190327	0.156896	0.0789843	0.0359006	0.0719487
ENSMUSG00000027157	4930430A15Rik	-2.47472	0.00216556	0.0341577	0.722438	1.18008	0.398016	0.30923	0.373872	0	0	0.0779314
ENSMUSG00000049916	2610318N02Rik	-2.47794	1.40944e-07	1.38073e-05	1.99102	4.06535	0.964887	2.49883	0.543814	0.311098	0.339367	0.510096
ENSMUSG00000031535	Dkk4	-2.48028	0.0147712	0.136394	0.0532033	0.260719	1.16025	0.336535	0.0475579	0	0.108821	0.163567
ENSMUSG00000017720	Trp53tg5	-2.48465	0.0468372	0.2842	0.149812	0.611786	0.196025	0.270751	0.133916	0	0	0.0767632
ENSMUSG00000070732	Rbm44	-2.48816	0.00105455	0.0198414	0.163506	0.534165	0.142628	0.164166	0.0974375	0.0204383	0.0371591	0.0186177
ENSMUSG00000026523	Wdr64	-2.49898	0.000268898	0.00691405	0.219605	0.283985	0.1756	0.248053	0.0654341	0.020588	0.0374312	0.0375082
ENSMUSG00000076438	Oxct2b	-2.499	0.00242152	0.0373258	0.48389	0.889223	0.211052	0.400821	0.252317	0.0453648	0	0.0413238
ENSMUSG00000084135	Pom121l12	-2.49964	0.0141282	0.132386	0.404018	0.54996	0.293691	0.304237	0.0601912	0.151507	0.0688641	0
ENSMUSG00000045004	Spata21	-2.50271	9.99707e-09	1.36207e-06	1.24636	1.78706	0.628169	1.32648	0.297096	0.124636	0.141627	0.312219
ENSMUSG00000048602	Morc2b	-2.50839	2.53838e-06	0.000161334	0.39906	0.874075	0.26899	0.426168	0.0972859	0.081626	0.0556519	0.111533
ENSMUSG00000029423	Piwil1	-2.51371	4.16074e-05	0.00153166	0.296156	0.867926	0.440698	0.251874	0.171296	0	0.0890809	0.0535584
ENSMUSG00000078958	Atp6ap1l	-2.51871	0.0396307	0.257828	0.235961	0.481794	0.102916	0.213222	0	0.0663642	0	0.120905
ENSMUSG00000091017	Fam71a	-2.52233	0.0308842	0.219542	0.281854	0.2302	0	0.198094	0.055988	0.0352318	0	0.0320935
ENSMUSG00000043986	Spata31d1d	-2.52688	0.00602965	0.0719794	0.237656	0.209034	0.127576	0.0495587	0.0653657	0.0205665	0	0.0187345
ENSMUSG00000020617	1700012B07Rik	-2.52784	0.0236665	0.185598	0.0687591	0.365027	0.149949	0.186399	0.0921945	0	0	0.0352319
ENSMUSG00000011349	Dmrtc2	-2.53943	0.0359011	0.241244	0.0864267	0.317645	0.0753911	0.273343	0.0386279	0.0486151	0	0.0442847
ENSMUSG00000067702	Tuba3a	-2.53977	3.55645e-10	6.91088e-08	3.33817	6.77813	2.58838	2.38805	0.870319	0.625908	0.189661	0.902744
ENSMUSG00000002190	Clgn	-2.54034	1.33284e-07	1.31111e-05	0.878564	1.56691	0.547416	0.615678	0.272464	0.141198	0.0183367	0.183744
ENSMUSG00000052469	Tcp10c	-2.54567	0.000266094	0.0068643	0.27675	0.723301	0.217271	0.400129	0.0989535	0.0934034	0.0283029	0.0567222
ENSMUSG00000051648	Kctd19	-2.54632	3.89236e-08	4.52334e-06	0.918142	1.44352	0.580657	0.684473	0.225697	0.206582	0.0469487	0.141136
ENSMUSG00000039742	Fam71f1	-2.55131	0.000893097	0.0175384	0.618355	1.26258	0.269699	0.399119	0.236889	0.0993787	0	0.0905263
ENSMUSG00000092518	Fam71e2	-2.55155	4.88592e-05	0.00174181	0.739399	0.645541	0.333614	0.230395	0.113955	0.0860509	0.026075	0.104514
ENSMUSG00000014529	Tmbim7	-2.55601	0.00101899	0.0193411	0.360631	1.2518	0.314583	0.448083	0.161182	0.101428	0	0.138589
ENSMUSG00000043468	Adam30	-2.56593	0.0108421	0.109376	0.219255	0.260471	0.0347744	0.0900576	0.0178173	0.0672717	0	0.0204265
ENSMUSG00000022085	Pebp4	-2.56614	0.00311162	0.0447023	1.36164	2.01237	0.226243	0.468734	0.405718	0	0	0.26579
ENSMUSG00000040298	Btbd16	-2.5664	0.000233056	0.00618708	0.203734	0.349434	0.17772	0.349793	0.0728464	0.0458404	0.0208357	0.0417571
ENSMUSG00000024306	Ccdc178	-2.58198	0.00117779	0.0215947	0.125869	0.394075	0.201295	0.17061	0.0375044	0.0708017	0.0214542	0.0214983
ENSMUSG00000038932	Tcfl5	-2.5913	4.12034e-05	0.00152151	0.817538	1.41247	0.301717	0.483033	0.168643	0.0707487	0.0321572	0.225563
ENSMUSG00000079169	Gm15130	-2.60169	0.042116	0.267136	0.844192	0.603297	0	0.476776	0.0943267	0.118715	0	0.10814
ENSMUSG00000031554	Adam5	-2.60278	9.64044e-12	2.75357e-09	2.53178	4.03323	1.46505	1.72152	0.739439	0.253805	0.333267	0.256886
ENSMUSG00000070980	Actl7b	-2.60603	6.27132e-05	0.00211185	1.21547	1.54864	0.55134	0.790805	0.217299	0.0546962	0	0.398593
ENSMUSG00000074734	4933416C03Rik	-2.61208	0.000716929	0.0149615	0.279353	0.963332	0.270759	0.196337	0.110982	0.0698384	0.0317435	0.0636175
ENSMUSG00000046755	Kif2b	-2.62247	0.000158215	0.00453543	1.12239	1.17134	0.407948	0.422596	0.3623	0.0350748	0	0.0958514
ENSMUSG00000035057	Mgat4d	-2.62844	0.0193936	0.163501	0.124194	0.540978	0.108336	0.224451	0.111015	0	0.0423372	0
ENSMUSG00000020867	Spata20	-2.64668	2.88175e-11	7.19133e-09	2.13056	3.50197	1.18481	2.06965	0.595152	0.299611	0.108945	0.409384
ENSMUSG00000051732	Pabpc2	-2.6577	3.91691e-08	4.52966e-06	1.16333	2.54106	0.778793	0.831205	0.290202	0.273925	0.0553363	0.2218
ENSMUSG00000020037	Rfx4	-2.66788	0.00259663	0.0390156	0.217766	0.29104	0.18996	0.0536676	0.0530888	0	0.0404922	0.0202877
ENSMUSG00000068860	Gm128	-2.66879	1.01922e-05	0.000488133	0.64284	1.54592	0.716523	0.580892	0.0638475	0.0803552	0.328713	0.0731974
ENSMUSG00000024154	Gtf2a1l	-2.66927	0.000133644	0.00392116	0.60424	1.30426	0.338841	0.507012	0.154321	0.145665	0.0441393	0.08846
ENSMUSG00000062732	Lypd4	-2.68142	7.48322e-05	0.00244696	1.14437	1.5719	0.589872	0.423036	0.0929942	0.175557	0.0531969	0.266531
ENSMUSG00000031553	Adam3	-2.68179	0.00117271	0.0215515	1.60687	3.41637	0.756467	1.12935	0.615582	0.172165	0.0260845	0.261381
ENSMUSG00000075249	Fsip2	-2.68705	1.54247e-06	0.000107236	0.457227	0.717101	0.260116	0.290414	0.109582	0.0670933	0.0169421	0.0746984
ENSMUSG00000003341	Atp8b3	-2.69068	4.57908e-08	5.24426e-06	2.01388	4.23505	1.48008	2.04908	0.538637	0.410309	0.129737	0.438761
ENSMUSG00000030851	Ldhc	-2.69777	3.44072e-06	0.000205983	5.66849	11.3447	4.00921	4.10702	1.73465	1.03412	0.261131	0.837336
ENSMUSG00000069971	4933402J07Rik	-2.70932	0.000425348	0.00980906	1.07304	1.35841	0.32761	0.387855	0.191836	0.120718	0	0.164947
ENSMUSG00000046723	Adam24	-2.71273	0.00688807	0.0794816	0.121168	0.257302	0.126836	0.13139	0.0216621	0	0.0247834	0.0496688
ENSMUSG00000036244	Tbc1d21	-2.72395	0.00791398	0.0875578	0.436243	0.400832	0.19027	0.394204	0.0974881	0	0	0.111764
ENSMUSG00000035522	Tsga8	-2.72845	0.00654269	0.0765963	0.588469	0.320416	0.285183	0.531761	0.116895	0.0735588	0	0.0670064
ENSMUSG00000050844	1700020N01Rik	-2.7385	0.0281127	0.206977	0.32939	0.807074	0.114932	0.119059	0	0.148226	0	0.0675112
ENSMUSG00000026940	Ccdc183	-2.7398	7.50402e-05	0.00245038	0.49669	0.540887	0.144423	0.384709	0.105711	0.053217	0.0241886	0.0484766
ENSMUSG00000045022	1700024P04Rik	-2.7411	0.0327011	0.227262	1.16362	0.712775	0.12688	0.920048	0	0	0	0.447174
ENSMUSG00000039209	Rpl39l	-2.75322	0.0324179	0.225954	0.521459	0.993753	0.0758125	0.157069	0.0776877	0	0	0.178129
ENSMUSG00000074817	Papolb	-2.7559	4.04479e-09	5.81151e-07	0.77571	1.45582	0.374323	0.626388	0.147532	0.0742702	0.101274	0.152223
ENSMUSG00000039179	Tekt5	-2.76455	0.00259371	0.0390156	0.271623	0.570457	0.169243	0.315576	0.0693717	0.0873077	0.0396837	0
ENSMUSG00000030137	Tuba8	-2.7769	9.80757e-05	0.0030553	0.401905	0.707001	0.404523	0.363175	0.165812	0.0347803	0	0.0633644
ENSMUSG00000021758	Ddx4	-2.77877	8.85238e-08	9.20454e-06	0.975571	1.55563	0.425502	0.566717	0.124579	0.0783943	0.0950197	0.214234
ENSMUSG00000061633	1700029P11Rik	-2.78136	0.034724	0.236213	0.478259	0.72542	0.238395	0	0	0	0.0698728	0.140033
ENSMUSG00000053624	Gykl1	-2.78825	1.45094e-05	0.000655016	1.26565	1.29213	0.398682	0.476536	0.157132	0.23731	0	0.108086
ENSMUSG00000046173	Pabpc6	-2.79456	0.00546641	0.0669723	0.414366	1.94151	0.114144	0.335021	0.21444	0.0736046	0.0223036	0.0893976
ENSMUSG00000031330	Zcchc13	-2.80493	0.0200925	0.166937	0.515852	0.473979	0.337488	0.0582677	0.0576393	0.145084	0	0
ENSMUSG00000056617	4931429L15Rik	-2.80501	0.0191511	0.16209	0.171729	0.504926	0.299603	0	0.0614027	0.0772782	0	0
ENSMUSG00000041358	Nutm1	-2.80909	0.0468105	0.284161	0.0937582	0.0918909	0.0490719	0.0338893	0	0	0	0.0384331
ENSMUSG00000020805	Slc13a5	-2.82253	0.00357537	0.0498303	0.189144	0.308962	0.0916628	0.132936	0.075144	0	0	0.0215371
ENSMUSG00000032110	Acrv1	-2.82491	0.011652	0.114715	0.32142	0.227513	0.0560757	0.0193631	0	0.0241066	0.0219142	0.0439184
ENSMUSG00000020020	Usp44	-2.82562	0.000431744	0.00993723	0.213734	0.64007	0.145011	0.321896	0.106142	0.0267169	0	0.048674
ENSMUSG00000025480	Syce1	-2.82854	8.04882e-05	0.00258906	1.24591	1.99601	0.376207	0.433017	0.214173	0	0.14702	0.19643
ENSMUSG00000027431	Scp2d1	-2.83328	0.00940966	0.0987931	1.38084	0.451112	0.481809	0.249554	0.246863	0	0	0.094338
ENSMUSG00000070979	Actl7a	-2.84106	2.6093e-05	0.00105741	0.971058	1.28406	0.564711	0.543203	0.0826683	0.0520211	0.28374	0.0473872
ENSMUSG00000062773	Tex101	-2.84752	0.00670542	0.077886	0.45877	1.17092	0.100048	0.36274	0	0	0.0586474	0.235072
ENSMUSG00000022603	Mroh4	-2.84898	1.80751e-06	0.00012139	0.605312	1.41935	0.408791	0.441114	0.24436	0.0439341	0.0199692	0.0800412
ENSMUSG00000078127	Fam170b	-2.85019	0.0376786	0.249441	0.198596	0.347572	0	0.0512737	0.0507207	0	0	0.0290742
ENSMUSG00000069118	1700008P02Rik	-2.85052	0.0392634	0.256141	0.268055	0.656791	0.233828	0.161483	0	0.100521	0.0913791	0
ENSMUSG00000044581	4932415D10Rik	-2.85953	1.99626e-10	4.17137e-08	0.370392	0.491583	0.18982	0.259392	0.0951881	0.0260432	0.0094699	0.0474468
ENSMUSG00000031898	Dpep3	-2.86385	6.25694e-05	0.00211	1.03007	1.07686	0.251592	0.595717	0.184154	0	0.0842754	0.126673
ENSMUSG00000029883	1700074P13Rik	-2.86422	1.81061e-05	0.000789048	1.10445	2.04694	0.407602	0.460622	0.227827	0.143366	0.086885	0.0870636
ENSMUSG00000029235	Pdcl2	-2.88918	1.15335e-05	0.000539298	0.94784	1.83857	0.723461	0.910032	0.211816	0.266581	0.0605841	0.0607086
ENSMUSG00000027518	1700021F07Rik	-2.89218	0.0326044	0.22687	0.216602	0.53072	0.472361	0.391458	0.096809	0	0	0.110986
ENSMUSG00000031552	Adam18	-2.89553	0.010148	0.104372	0.325958	0.411433	0.0775465	0.0535539	0.0794646	0.0333367	0	0
ENSMUSG00000020481	Ankrd36	-2.89984	1.85232e-07	1.75652e-05	0.638713	1.00515	0.326141	0.323774	0.153179	0.0525771	0.0159318	0.0798228
ENSMUSG00000051896	Tex37	-2.90357	0.00505146	0.0636656	0.77354	1.12316	0.52482	0.155333	0.153658	0.0966927	0	0.0880797
ENSMUSG00000029909	Prss37	-2.91706	0.000547433	0.0119944	0.867027	1.90651	0.34907	0.421871	0.119235	0	0.204623	0.136696
ENSMUSG00000043060	Fscb	-2.92022	1.49455e-05	0.000668516	0.374687	0.850057	0.236054	0.52668	0.167464	0.023418	0	0.063996
ENSMUSG00000021098	4930447C04Rik	-2.92977	0.0411011	0.263918	0.0341114	0.11144	0.0595115	0.308242	0.0304918	0	0	0.034957
ENSMUSG00000033255	Gm5134	-2.94718	0.0359904	0.24157	0.049304	0.221476	0.0430085	0.0668292	0.0220362	0	0	0.0252632
ENSMUSG00000031384	Asb9	-2.95003	0.0354717	0.239444	0.184273	0.501675	0.214325	0.0555052	0.0549066	0.0691026	0	0
ENSMUSG00000036211	Hist1h1t	-2.96902	1.72434e-06	0.000116955	1.07398	3.38334	1.1376	1.73302	0.137146	0.34521	0.156907	0.31446
ENSMUSG00000049506	Sppl2c	-2.97782	3.49334e-05	0.00135321	0.408769	1.10429	0.246859	0.483033	0.0562145	0.0353743	0.0643144	0.128893
ENSMUSG00000034239	Gm884	-2.98716	4.6476e-06	0.000260426	0.184833	0.281097	0.0667167	0.115187	0.0398807	0.0143405	0	0.0261262
ENSMUSG00000015365	Mov10l1	-3.00081	0.00392206	0.0533756	0.203133	0.179732	0.103364	0.0458895	0.0453946	0	0	0.0173474
ENSMUSG00000050996	Cetn1	-3.00548	5.97114e-05	0.00203974	0.841569	1.97037	0.538348	0.709772	0.100302	0	0.0573775	0.344973
ENSMUSG00000052642	4930504O13Rik	-3.02137	0.0285051	0.208764	0.892053	0.416326	0.666984	0.115156	0.113914	0	0	0.130595
ENSMUSG00000047720	4922502D21Rik	-3.04527	0.000815723	0.0164582	2.12275	5.63462	1.38878	1.51857	0.711564	0.348265	0	0.226602
ENSMUSG00000035560	Wdr20rt	-3.06133	0.00635687	0.0747902	0.216986	0.278489	0.10816	0.168065	0.0554175	0.0348728	0	0
ENSMUSG00000046934	Csl	-3.07913	5.31968e-05	0.00186283	0.680638	0.789965	0.28124	0.388451	0.0320218	0.040301	0.0366358	0.146845
ENSMUSG00000091012	Vmn1r34	-3.08674	0.0441772	0.27568	0.0227298	0.0928213	0.0594825	0.0616184	0	0	0	0.0232933
ENSMUSG00000062651	H2al2a	-3.08709	0.0309405	0.219761	0.129082	1.05426	0.1126	0.933143	0	0.145218	0.132011	0
ENSMUSG00000040629	Mael	-3.08993	3.49014e-10	6.83808e-08	2.15142	5.67691	1.73235	2.16841	0.665698	0.0930904	0.126936	0.46639
ENSMUSG00000021977	1700129C05Rik	-3.09419	4.93034e-06	0.000271384	1.77037	2.9454	0.571969	1.30351	0.410281	0	0.201171	0.13439
ENSMUSG00000047014	Catsperb	-3.09915	0.00126017	0.0226862	0.169446	0.599702	0.0328467	0.153117	0.0504886	0	0.0192545	0.0385882
ENSMUSG00000051276	Actrt2	-3.10758	3.93228e-05	0.00147271	1.07259	1.63259	0.212645	0.837065	0.174324	0.109697	0	0.149889
ENSMUSG00000056912	1700017N19Rik	-3.10826	0.00440622	0.0581617	0.395674	0.587566	0.0627548	0.16252	0.0964606	0	0	0.0368621
ENSMUSG00000025519	Tktl2	-3.11197	0.000626175	0.0133768	0.114797	0.281277	0.0667592	0.0922085	0.0228035	0.0286993	0	0.0130714
ENSMUSG00000054746	Abca15	-3.12058	0.00659201	0.0769836	0.0786831	0.182079	0.0343181	0.0592506	0	0.0295062	0.0134114	0
ENSMUSG00000022487	Gtsf1	-3.12133	0.00252193	0.0383253	1.02509	1.25584	0.22355	0.540346	0.0763597	0.288307	0	0
ENSMUSG00000028938	Galntl5	-3.12401	7.15098e-06	0.000365363	0.946019	2.17746	0.450122	0.543999	0.153752	0.0483761	0.0439765	0.220335
ENSMUSG00000063129	Aldoart2	-3.12824	2.17754e-05	0.000910457	0.506362	1.06837	0.552133	0.457566	0.113158	0.0474716	0.0431543	0.086486
ENSMUSG00000034623	Prss55	-3.13111	0.00538697	0.0661459	0.586277	1.3833	0.340945	0.0588645	0.0582296	0.219854	0	0
ENSMUSG00000025482	Odf3	-3.1347	0.00724817	0.0823346	0.21474	0.596313	0.112392	0.194047	0.0767816	0	0.0439225	0
ENSMUSG00000030344	Akap3	-3.13887	8.07483e-10	1.418e-07	1.28697	2.21097	0.483897	1.04265	0.218181	0.0748886	0.0453852	0.227393
ENSMUSG00000022542	Sept12	-3.14217	0.000195198	0.00533743	0.353071	0.621096	0.213223	0.245421	0.0485548	0	0	0.111331
ENSMUSG00000060081	Hist1h2aa	-3.14972	0.0204556	0.169087	0.358782	1.0256	0.782424	0.972622	0.320711	0	0	0
ENSMUSG00000026125	Prss39	-3.15626	0.000113805	0.00346338	0.938722	0.901986	0.289009	0.798364	0.148079	0.0621215	0	0.113176
ENSMUSG00000090132	Cypt2	-3.16694	0.049242	0.292943	0.100376	0.73783	0.0875597	0.181407	0.0897254	0	0	0
ENSMUSG00000045336	Hsfy2	-3.17217	0.0169934	0.150247	0.402083	0.205247	0.0876855	0.227085	0	0.056543	0	0.0515064
ENSMUSG00000047369	Dnah14	-3.17462	3.48875e-08	4.09445e-06	0.275845	0.438068	0.124767	0.110783	0.0593605	0.0172403	0.00522414	0.0209395
ENSMUSG00000089992	G6pd2	-3.18001	0.00524807	0.0652075	0.327763	0.267695	0.0519839	0.188477	0	0.0670425	0.0304727	0
ENSMUSG00000022249	Ttc23l	-3.19421	0.00579411	0.0700467	0.471005	0.325504	0.0632098	0.163699	0	0.0407602	0.0741065	0
ENSMUSG00000044576	Garem2	-3.20516	0.0400917	0.259737	0.0181015	0.0295683	0.126322	0.0327143	0	0	0.0185122	0
ENSMUSG00000033794	Lpcat2b	-3.2232	0.00162456	0.0274509	0.100593	0.472408	0.197434	0.159074	0.0674392	0.0282918	0	0
ENSMUSG00000047129	1700113H08Rik	-3.22832	0.0188384	0.1606	0.210097	0.514782	0.0916353	0.189851	0	0.11818	0	0
ENSMUSG00000063063	Ctnna2	-3.22944	0.0335588	0.231138	0.0504294	0.082375	0.0146634	0.0455698	0.0150261	0	0	0
ENSMUSG00000036872	Abcc12	-3.24392	0.000227877	0.00607679	0.264859	0.443455	0.0693118	0.0837674	0.0473508	0	0	0.0407137
ENSMUSG00000063089	Klk1b8	-3.25032	0.0330209	0.228763	0.407232	0.332601	0.142093	0.0735977	0.072804	0	0	0
ENSMUSG00000108763	Gm36028	-3.26851	0.0272779	0.20355	0.301302	0.147651	0.157698	0.108907	0.0538662	0	0	0
ENSMUSG00000020940	1700023F06Rik	-3.26983	0.00195487	0.0316774	0.350104	0.428914	0.3563	0.580004	0	0.0656446	0.0596746	0.0597972
ENSMUSG00000010435	Spaca7	-3.27025	0.0155352	0.141152	0.21705	0.649999	0.252447	0.261512	0.129346	0	0	0
ENSMUSG00000067338	Tuba3b	-3.27194	2.4691e-13	9.59589e-11	2.2861	5.18291	1.68475	2.20826	0.422796	0.088685	0.241858	0.403926
ENSMUSG00000044664	Prss42	-3.27527	0.0353061	0.238666	0.0441682	0.324664	0.0770569	0.0798238	0.0394814	0	0	0
ENSMUSG00000047995	Cypt4	-3.27834	0.0178658	0.155284	0.55614	1.09013	0.291077	0.201019	0.198851	0	0	0
ENSMUSG00000062154	Tex33	-3.28101	2.7474e-05	0.00110394	0.853944	1.59416	0.372453	1.26772	0.218095	0.0686207	0	0.125016
ENSMUSG00000028310	Ppp3r2	-3.29534	3.10352e-06	0.000191104	0.786094	0.963047	0.221851	0.292494	0.103335	0.0780316	0	0.0473872
ENSMUSG00000017195	Zpbp2	-3.29894	0.000130648	0.00387837	0.798556	1.26819	0.232197	0.320712	0.11897	0.0499099	0.0907417	0
ENSMUSG00000025977	Boll	-3.312	0.000117955	0.0035532	0.398268	0.758986	0.138966	0.263918	0.0949353	0.0298702	0	0.0272094
ENSMUSG00000045378	Pxt1	-3.31399	0.0420631	0.266988	0.197077	0.64384	0	0.356171	0	0	0	0.100982
ENSMUSG00000012042	4930579F01Rik	-3.33401	0.0216979	0.17562	0.121182	0.131965	0.176181	0.0730028	0	0.0454434	0	0
ENSMUSG00000032128	Robo3	-3.34774	0.0019847	0.0320294	0.0839549	0.0799971	0.207499	0.0632204	0.0125077	0.0157416	0.01431	0
ENSMUSG00000043319	Cox8c	-3.35219	4.54593e-05	0.00165292	3.5134	3.2438	1.73227	0.828215	0.409642	0	0.156222	0.313087
ENSMUSG00000051455	Meioc	-3.35834	0.000180133	0.00502649	0.214186	0.312381	0.146801	0.096773	0.0547025	0	0	0.0156783
ENSMUSG00000025955	Akr1cl	-3.39376	0.000597292	0.0128494	0.437017	0.77875	0.242591	0.215402	0.0355131	0	0	0.122141
ENSMUSG00000050439	Enthd1	-3.3957	0.0079536	0.0878648	0.13263	0.27081	0.115695	0.179774	0.0296391	0	0	0.0339796
ENSMUSG00000071104	Ccdc110	-3.40119	0.00405672	0.054893	0.105365	0.344222	0.0689334	0.285635	0.0706385	0	0	0
ENSMUSG00000027871	Hsd3b1	-3.4048	0.00159053	0.0270139	0.377156	0.369644	0.164499	0.272649	0.0674271	0	0	0.0386506
ENSMUSG00000060499	Rpl10l	-3.40618	0.00906457	0.0960634	0.478726	0.614417	0.178971	0.185397	0.0611326	0.0769383	0	0
ENSMUSG00000039555	Cylc2	-3.41123	0.000645917	0.0137062	0.42634	0.870518	0.371902	0.154102	0.0381101	0	0	0.131073
ENSMUSG00000026931	1700019N19Rik	-3.43444	1.66191e-06	0.000114532	1.42345	1.97639	0.869183	1.09333	0.254481	0.0800691	0.0727872	0.0729368
ENSMUSG00000028492	Saxo1	-3.46797	0.00120876	0.0220262	0.258846	0.604025	0.225795	0.167073	0	0.0416004	0.037817	0.0378947
ENSMUSG00000075524	4930407I10Rik	-3.46845	4.20854e-06	0.000240995	0.224574	0.782583	0.208959	0.24352	0.0802978	0	0	0.0460284
ENSMUSG00000038994	Hils1	-3.48976	1.93694e-05	0.000831084	1.53853	2.57927	0.847626	0.585374	0.0723826	0.182194	0	0.248947
ENSMUSG00000051036	Ttc24	-3.49754	0.0153111	0.139805	0.0621612	0.203077	0.081336	0.0842565	0	0.0349657	0	0
ENSMUSG00000022596	Slurp1	-3.52451	0.0356624	0.240321	0.0734128	0	0.0213463	0.243241	0.0218743	0	0	0
ENSMUSG00000055826	Tescl	-3.53602	0.0058152	0.070194	0.654619	0.534651	0.142758	0.591536	0	0.092056	0	0.083856
ENSMUSG00000050150	Slc9b1	-3.53648	0.000839241	0.0167571	0.311221	0.381278	0.217185	0.168738	0.0556393	0	0.0318282	0
ENSMUSG00000049491	Slc36a3	-3.54736	0.0411324	0.263961	0.0380024	0.15519	0.03315	0.103021	0	0	0	0
ENSMUSG00000030617	Ccdc83	-3.5492	0.000727636	0.0151449	0.5883	0.480485	0.315804	0.245357	0	0.0509107	0.0925612	0
ENSMUSG00000022832	Ropn1	-3.58602	4.74821e-05	0.00170554	1.59914	2.02442	0.55798	0.578015	0.214418	0	0.0817712	0.0819393
ENSMUSG00000038199	4931409K22Rik	-3.59684	0.000891628	0.0175272	0.157827	0.349879	0.17701	0.142618	0	0	0	0.069317
ENSMUSG00000091556	Gm14569	-3.60389	4.94857e-07	4.05937e-05	0.29708	0.474243	0.20025	0.183035	0.0241415	0	0.0276201	0.0415153
ENSMUSG00000051936	Prss58	-3.62123	0.0176719	0.154195	0.0714631	0.758765	0.124676	0.129153	0	0	0	0.0732348
ENSMUSG00000021415	4933417A18Rik	-3.62213	0.0126156	0.121923	0.179085	0.341285	0.0520726	0.323654	0.0533606	0	0	0
ENSMUSG00000050799	Hist1h2ba	-3.62242	1.12281e-08	1.51241e-06	6.74117	8.48184	6.03934	2.96346	1.30289	0	0	0.560132
ENSMUSG00000023047	Amhr2	-3.63333	0.000416298	0.00966618	0.252702	0.442266	0.283417	0.391458	0	0.0406129	0.0738388	0
ENSMUSG00000038246	Fam50b	-3.63842	0.00859647	0.0927613	0.260083	0.169935	0.226874	0.141012	0	0	0.0531969	0
ENSMUSG00000040013	Fkbp6	-3.65243	0.0448958	0.277881	0	0.157957	0.210881	0.0873814	0	0	0	0
ENSMUSG00000110477	Gm3045	-3.65291	0.0314079	0.221734	0.191678	0.03131	0.0668812	0.0692827	0	0	0	0
ENSMUSG00000057173	Rfx8	-3.68051	0.00419825	0.0562622	0.104526	0.483762	0.151965	0.157421	0.0311447	0	0	0.0357056
ENSMUSG00000027973	1700006A11Rik	-3.6808	0.000562695	0.0122721	0.226625	0.449511	0.282411	0.263297	0.086819	0	0	0
ENSMUSG00000109344	A26c2	-3.68812	0.0123486	0.119831	0.350865	0.573127	0.0612127	0.126821	0.0627268	0	0	0
ENSMUSG00000024565	Sall3	-3.69289	0.0240743	0.187988	0.0203202	0.0414906	0.0177256	0.018362	0	0	0	0
ENSMUSG00000055780	Usp26	-3.69289	0.0240743	0.187988	0.0338555	0.0691275	0.0295326	0.030593	0	0	0	0
ENSMUSG00000015242	Nipsnap3a	-3.72274	0.0448635	0.277881	0.0450498	0.147175	0	0.244252	0	0	0	0
ENSMUSG00000023403	Stk31	-3.73321	0.003794	0.0521417	0.12968	0.300091	0.0377072	0.117183	0	0	0.0221037	0.0221492
ENSMUSG00000071937	Adam25	-3.78322	0.0229765	0.182542	0.026693	0.152608	0.0465693	0.0482415	0	0	0	0
ENSMUSG00000032566	1700080E11Rik	-3.78563	0.00281393	0.0415896	0.633861	0.841258	0.138231	0.572779	0.0708251	0.0891369	0	0
ENSMUSG00000025056	Nr0b1	-3.79113	0.035787	0.240818	0.232176	0.0948133	0	0.0699341	0	0	0	0
ENSMUSG00000039174	1700003H04Rik	-3.833	0.012243	0.119246	0.193266	0.578774	0	0.349284	0.0575862	0	0	0
ENSMUSG00000109737	Gm39566	-3.84936	1.50382e-06	0.000105165	0.268535	0.467888	0.281096	0.275012	0.0480081	0.0402804	0	0
ENSMUSG00000053856	Dnajc5g	-3.85474	0.00421012	0.0563894	0.670566	0.401629	0.0389962	0.201982	0	0	0	0.0916254
ENSMUSG00000096405	4930474N05Rik	-3.87451	0.0282926	0.207786	0.151237	0.123521	0	0.0546653	0	0	0	0
ENSMUSG00000079580	Tmem217	-3.91831	0.0160339	0.144312	0.464352	0.126418	0.06751	0.209802	0	0	0	0
ENSMUSG00000070563	Spaca4	-3.93523	0.0149068	0.137241	0.0989567	0.161643	0.604248	0.268262	0	0	0	0
ENSMUSG00000061825	Ces2c	-3.94579	0.0490067	0.291983	0.284111	0	0.123917	0	0	0	0	0
ENSMUSG00000043388	Tmem130	-3.95571	0.00475266	0.0613679	0.0997681	0.264824	0.0435145	0.0676154	0	0	0	0.0255604
ENSMUSG00000085486	Gm11634	-3.95877	0.0134055	0.127684	0.370662	0.454099	0.0808332	0.167471	0	0	0	0
ENSMUSG00000074764	Sel1l2	-3.96042	0.0036413	0.0504853	0.126286	0.257856	0.165241	0.0570582	0	0	0	0.0323542
ENSMUSG00000016626	Nlrp14	-3.96732	0.00248748	0.0379477	0.149675	0.366735	0.0186519	0.135252	0.0191133	0	0	0.0219122
ENSMUSG00000013668	4933402N03Rik	-3.97768	0.0302751	0.2171	0.0766291	0.344222	0.0334223	0	0	0	0	0
ENSMUSG00000038498	Catsper1	-3.98812	0.00157015	0.0267219	0.441296	0.388147	0.177668	0.0920239	0	0	0	0.0695748
ENSMUSG00000024729	1700017D01Rik	-4.00335	0.00155106	0.026454	0.388218	0.317071	0.0483782	0.150346	0	0.0311962	0	0.0284173
ENSMUSG00000072995	Cpxcr1	-4.01786	0.0109551	0.110141	0.0876722	0.28642	0.0764775	0.0792236	0	0	0	0
ENSMUSG00000057116	AF366264	-4.02955	0.00152638	0.0261092	0.132966	0.416294	0.0579941	0.120153	0.0198095	0	0	0.0227104
ENSMUSG00000091844	Gm8251	-4.10172	9.73678e-06	0.000472045	0.210413	0.381893	0.10197	0.105631	0.0208984	0	0	0.0239589
ENSMUSG00000030292	Smco2	-4.12947	0.00102492	0.0194163	0.438636	0.985186	0.239142	0.247729	0.0980229	0	0	0
ENSMUSG00000026336	Slco6d1	-4.13219	0.00279544	0.041368	0.0739039	0.3018	0.0429782	0.111304	0	0	0	0.0252454
ENSMUSG00000031991	Spata19	-4.13367	6.35893e-05	0.00212925	0.841231	1.88943	0.489211	0.506777	0.0626639	0.0788656	0	0.0718405
ENSMUSG00000071015	Gm136	-4.14241	0.000782881	0.0159311	0.907217	0.435857	0.232758	0.337561	0	0	0	0.109377
ENSMUSG00000055643	Ubqln5	-4.16105	0.00230805	0.0360158	0.255737	0.387901	0.0956069	0.0660266	0	0.0411007	0	0
ENSMUSG00000069355	Gm5152	-4.24526	0.00608024	0.0723644	0.424529	0.554765	0.148129	0.0767238	0	0	0	0
ENSMUSG00000039198	Ptchd3	-4.26876	0.00509351	0.0640254	0.065713	0.375691	0	0.079174	0.01958	0	0	0
ENSMUSG00000048411	Gm597	-4.27127	0.00142067	0.0248743	0.169635	0.277094	0.0634178	0.0656949	0.0216621	0	0	0
ENSMUSG00000035582	Gdpd4	-4.28255	0.00130813	0.0233347	0.183328	0.243312	0.0599696	0.0621229	0	0.0257805	0	0
ENSMUSG00000079022	Col22a1	-4.33389	0.000187121	0.00515223	0.0714794	0.110273	0.0762084	0.0645912	0.0070994	0.00893494	0	0
ENSMUSG00000056223	Spata31	-4.39724	0.000217458	0.00583838	0.281408	0.335914	0.226593	0.0782431	0.0193498	0	0	0.0221834
ENSMUSG00000022269	44266	-4.45284	2.15634e-05	0.000903185	0.815033	0.87868	0.170631	0.265137	0.0582839	0	0.033341	0
ENSMUSG00000042800	Spata46	-4.46449	0.00162884	0.0274643	0.544455	0.29645	0.237467	0.40999	0	0	0	0
ENSMUSG00000048400	Prss54	-4.49042	0.000561703	0.0122618	0.206501	0.607163	0.180133	0.149281	0	0	0	0.042324
ENSMUSG00000073380	Arrdc5	-4.50162	0.00130974	0.0233458	0.199134	0.32528	0.231609	0.359889	0	0	0	0
ENSMUSG00000038997	Asb17	-4.51066	0.000314376	0.00779594	0.191828	0.805746	0.167334	0.0990528	0.0244961	0	0.0280258	0
ENSMUSG00000037529	Prss40	-4.5403	0.00141094	0.0247222	0.128844	0.350772	0.149857	0.116428	0	0	0	0
ENSMUSG00000038691	Mbd3l1	-4.58764	0.00213495	0.0337872	0.246926	0.941143	0.143598	0.148754	0	0	0	0
ENSMUSG00000041791	Capza3	-4.68944	0.00018176	0.00506344	0.515271	0.748161	0.349594	0.206941	0.0511773	0	0	0
ENSMUSG00000041009	Iqcf4	-4.77929	0.000130877	0.00387837	0.925429	1.28491	0.322905	0.585374	0	0	0.0946426	0
ENSMUSG00000065968	Ifitm7	-4.82261	0.000336042	0.00821112	0.307021	0.125378	0.167386	0.208076	0	0	0	0
ENSMUSG00000027480	Sun5	-4.83314	0.000277634	0.00708489	0.302344	0.444483	0.263738	0.273208	0	0	0	0
ENSMUSG00000041550	Serpina5	-4.9559	0.00035276	0.00849025	0.38832	0.185007	0.0564561	0.116967	0	0	0	0
ENSMUSG00000053868	Gm5142	-4.99029	0.000167485	0.00474382	0.894088	0.638955	0.292472	0.807929	0	0	0	0
ENSMUSG00000027355	Tmco5	-5.04572	3.87846e-05	0.00145716	0.661157	1.07998	0.262152	0.434505	0.0537273	0	0	0
ENSMUSG00000043945	Adam6a	-5.05755	0.000327719	0.00804448	0.136752	0.379747	0.143149	0.0247148	0	0	0	0
ENSMUSG00000030968	Pdilt	-5.12595	5.17768e-05	0.00182118	0.815033	0.266267	0.19907	0.117839	0	0	0	0.0334095
ENSMUSG00000027564	Cypt12	-5.1717	3.08626e-05	0.0012174	1.52645	2.49342	0.332886	1.26441	0.113707	0	0	0
ENSMUSG00000050876	Spata31d1a	-5.27835	4.25192e-05	0.00156038	0.0919694	0.171691	0.0573043	0.0593619	0	0	0	0

## Sheet: Ca
Gene ID	Gene name	log2FC	Pvalue	FDR	3M-Ca1	3M-Ca2	3M-Ca3	3M-Ca4	21M-Ca1	21M-Ca2	21M-Ca3	21M-Ca4
ENSMUSG00000020017	Hal	-0.585387	0.0044292	0.0415745	4.53104	2.29457	3.2736	6.05492	3.48456	2.31785	3.32818	3.54205
ENSMUSG00000035674	Ndufa3	-0.586385	0.00252429	0.0279352	31.0469	25.3617	35.1808	36.9182	30.473	27.7196	25.9959	21.5524
ENSMUSG00000038384	Setd1b	-0.587979	0.000266466	0.00545171	15.6294	5.42582	9.23988	9.01814	7.27186	7.6405	7.25906	8.24591
ENSMUSG00000044068	Zrsr1	-0.588424	0.0267636	0.137826	5.19092	6.20561	6.03045	5.88386	4.86069	5.09802	5.46793	4.9278
ENSMUSG00000038895	Zfp653	-0.58924	0.000844644	0.0126655	4.20782	1.79359	3.37167	2.86171	2.51776	1.99097	2.27024	2.72749
ENSMUSG00000003437	Paf1	-0.590441	0.000660645	0.0104654	23.0272	18.4702	30.9474	26.1683	21.58	18.127	20.2255	20.4835
ENSMUSG00000037791	Phf12	-0.590649	6.01576e-07	4.61055e-05	24.1213	12.0561	20.6762	18.9121	15.5804	13.7937	15.3399	15.1841
ENSMUSG00000038884	A230050P20Rik	-0.59275	0.000637246	0.0101883	25.5567	12.452	19.4012	14.39	14.5173	14.6453	14.3628	13.8068
ENSMUSG00000007880	Arid1a	-0.592838	5.73263e-05	0.0017023	40.2193	17.1064	27.3722	25.7578	20.3991	21.0409	21.1298	24.2184
ENSMUSG00000071659	Hnrnpul2	-0.593115	0.00587489	0.0503485	31.588	24.1523	23.8408	25.7138	22.0108	23.2345	22.6096	21.3472
ENSMUSG00000063838	Cdc42ep5	-0.593667	0.032589	0.154449	3.59062	0.967455	4.36014	2.56622	2.32487	2.31306	1.99279	2.04845
ENSMUSG00000061048	Cdh3	-0.595359	3.89468e-05	0.0012689	43.5459	28.0483	41.227	48.8923	33.5802	28.539	33.5243	34.354
ENSMUSG00000024534	Sncaip	-0.595509	0.0150846	0.0944464	0.908587	0.512085	1.29361	0.999201	0.728775	0.854931	0.613795	0.685724
ENSMUSG00000034889	Cactin	-0.597491	2.16781e-05	0.000802687	9.99189	4.97296	7.95256	7.72702	5.94894	5.68864	6.41281	5.93601
ENSMUSG00000053199	Arhgap20	-0.597791	0.00108586	0.0151531	2.24645	1.68304	3.82562	3.01919	2.19076	2.13785	2.11214	2.0366
ENSMUSG00000052713	Zfp608	-0.598731	0.000245005	0.00515236	4.28308	3.02025	5.23242	4.42959	3.38985	3.2695	3.08733	3.80669
ENSMUSG00000086158	Ccpg1os	-0.599834	0.00476598	0.0438158	6.0315	4.98253	8.03365	7.31686	4.35804	6.1805	6.0004	4.61864
ENSMUSG00000036850	Mrpl41	-0.600627	0.00124343	0.0168645	49.2635	38.3367	89.5296	76.0607	50.0721	51.6777	52.0178	44.9738
ENSMUSG00000023908	Pkmyt1	-0.601268	0.00190849	0.0229071	3.78467	1.34678	3.47277	2.70592	2.04523	2.39198	1.95583	2.22648
ENSMUSG00000032028	Nxpe2	-0.601459	0.00453419	0.042346	23.4376	18.1069	33.7623	48.9267	22.635	21.5737	29.4893	23.5689
ENSMUSG00000025369	Smarcc2	-0.602054	0.000179205	0.00408919	44.8005	30.4318	41.9721	40.1078	31.7331	32.385	31.2781	32.6528
ENSMUSG00000041133	Smc1a	-0.602463	0.0103355	0.0739619	10.7308	11.7241	13.5854	12.5685	9.80706	11.1335	10.4711	9.9801
ENSMUSG00000040435	Ppp1r15a	-0.602672	2.91562e-05	0.00100844	7.0371	4.12765	7.19054	8.29066	4.73657	5.16066	5.34986	5.47475
ENSMUSG00000025794	Rpl14	-0.602861	0.0182551	0.107728	64.8721	89.4836	114.255	115.843	79.2663	85.967	88.0453	73.4011
ENSMUSG00000022475	Hdac7	-0.603611	0.000962268	0.0138859	46.0767	12.0776	22.5596	27.9961	20.8079	20.0904	18.4618	21.5967
ENSMUSG00000030431	Tmem238	-0.60372	0.000340819	0.00651758	10.9224	4.21621	9.41318	6.99879	6.5472	5.41917	5.51769	6.64461
ENSMUSG00000022543	4930451G09Rik	-0.604505	0.00367651	0.0364062	2.58325	1.52145	2.5258	2.15209	1.68036	1.59676	1.94005	1.5949
ENSMUSG00000043866	Taf10	-0.604679	5.41726e-07	4.21882e-05	16.1541	7.84005	20.0384	19.2122	12.2771	10.7757	12.2691	12.8182
ENSMUSG00000004231	Pax2	-0.605934	0.000213892	0.00463952	65.9537	19.8489	35.0003	44.6645	30.4086	30.2792	29.3944	34.2204
ENSMUSG00000001289	Pfdn5	-0.606802	0.015785	0.0974883	99.8853	134.101	181.993	205.697	125.345	137.648	139.856	116.274
ENSMUSG00000024217	Snrpc	-0.607041	5.55361e-05	0.0016573	3.88096	2.63209	4.82955	4.91467	3.4097	2.93013	3.29201	3.11048
ENSMUSG00000042487	Leo1	-0.607372	0.0107118	0.0757654	3.44291	2.98843	2.74389	3.42612	2.72368	2.81693	2.56526	2.4095
ENSMUSG00000052488	Cherp	-0.607479	9.89483e-07	6.90407e-05	21.2472	9.92279	17.2262	17.1922	11.6415	13.9931	12.0241	13.1438
ENSMUSG00000048118	Arid4a	-0.607903	0.00532737	0.0470766	7.30433	7.4174	9.31348	8.83134	6.84721	7.0613	6.37354	7.1644
ENSMUSG00000031847	1700030J22Rik	-0.608643	0.00188287	0.022694	3.11167	2.28123	3.296	3.12586	2.22426	2.39001	2.1081	2.6505
ENSMUSG00000072214	Sept5	-0.609386	0.00530359	0.0469343	2.12103	1.36279	2.83792	2.05105	1.61829	1.65607	1.57767	1.62745
ENSMUSG00000037907	Ankrd13b	-0.610755	0.000532714	0.00907394	4.18161	2.05792	2.94032	3.21162	2.57951	2.45698	2.50748	2.0753
ENSMUSG00000033088	Triobp	-0.61107	3.48074e-06	0.000193177	12.158	7.3977	12.0572	13.0239	8.11424	8.82209	9.47362	8.66964
ENSMUSG00000018102	Hist1h2bc	-0.611088	0.000529622	0.00904892	30.0913	23.7551	37.4052	43.1219	25.424	25.1973	26.1678	30.141
ENSMUSG00000080316	Spaca6	-0.611362	2.27894e-05	0.000834872	51.8571	23.7229	34.6906	36.3454	27.589	27.9838	29.0201	29.9617
ENSMUSG00000019487	Trip10	-0.611501	9.55865e-09	1.47926e-06	18.8706	9.36352	17.407	16.7024	12.1138	11.6047	11.9616	12.3242
ENSMUSG00000035372	1810055G02Rik	-0.612676	0.0114956	0.0790005	9.62015	8.39	8.14176	8.14728	8.19513	7.23468	6.64123	6.69391
ENSMUSG00000042423	Fbrs	-0.613533	0.000201849	0.0044584	30.2362	9.99735	16.8717	17.3556	13.8394	13.8861	13.8686	14.793
ENSMUSG00000021958	Pinx1	-0.615021	0.0461528	0.192702	3.30038	5.47803	5.96096	6.68803	4.60036	4.60316	4.35636	4.5135
ENSMUSG00000035235	Trim13	-0.615846	0.0250388	0.132013	1.64994	1.27212	3.22649	2.53611	1.39012	1.71546	1.92251	1.61234
ENSMUSG00000039671	Zmynd8	-0.616204	1.96381e-06	0.000120026	44.9237	22.497	35.9332	36.1212	26.6895	25.8895	25.307	30.9048
ENSMUSG00000035390	Brsk1	-0.616415	0.0394105	0.17445	1.9219	0.330989	1.58857	0.985032	1.1268	0.791351	0.714243	0.890231
ENSMUSG00000038248	Sobp	-0.619845	0.039755	0.17546	0.691353	0.536105	0.699288	0.63125	0.292424	0.612105	0.605477	0.501383
ENSMUSG00000025134	Alyref	-0.620112	0.00266123	0.0289012	6.74901	6.27197	8.21163	7.54878	5.93063	5.76181	5.83271	6.01745
ENSMUSG00000040725	Hnrnpul1	-0.620601	0.000331318	0.00637854	98.9403	72.2887	91.2181	94.0971	74.7833	70.5502	71.8963	72.449
ENSMUSG00000034813	Grip1	-0.62206	7.45734e-05	0.00208374	3.56101	1.45535	3.49246	2.3539	2.29512	1.9759	1.94498	1.99881
ENSMUSG00000007721	Ccdc124	-0.622086	0.000478036	0.00839938	13.5707	9.78816	16.2651	12.727	10.9835	9.79128	9.325	11.2574
ENSMUSG00000040536	Necab1	-0.623116	0.0466448	0.194177	0.675379	0.495929	1.41506	1.42076	1.15658	0.770707	0.523684	0.599526
ENSMUSG00000032531	Amotl2	-0.62328	9.36097e-10	2.03597e-07	12.4568	5.23812	11.6423	11.4631	8.77704	6.93157	7.43729	7.60137
ENSMUSG00000031147	Magix	-0.624137	0.0413988	0.180276	0.900059	0.523221	0.984809	0.555861	0.573523	0.611369	0.579388	0.512161
ENSMUSG00000026226	Spata3	-0.624139	8.93093e-06	0.000391308	29.5736	17.2489	27.9224	30.2283	21.9454	17.2095	19.9353	22.2389
ENSMUSG00000002768	Mea1	-0.624714	0.000449099	0.0079898	29.4685	22.7932	31.9916	37.7296	24.0348	25.1604	25.5326	21.8883
ENSMUSG00000026078	Pdcl3	-0.625127	0.0022644	0.0257864	4.42857	3.66394	4.37457	5.54026	3.68685	4.04984	3.504	3.20419
ENSMUSG00000043913	Ccdc60	-0.62646	0.0310243	0.150098	0.809009	0.519796	1.07117	0.710411	0.826957	0.538532	0.428063	0.612267
ENSMUSG00000048763	Hoxb3	-0.6288	1.32084e-06	8.50339e-05	47.7866	14.9213	34.024	34.0889	24.6516	23.2523	21.9079	26.5948
ENSMUSG00000032575	Manf	-0.628915	0.000163007	0.0038059	97.8783	68.1667	126.388	155.464	88.1999	72.2918	93.8689	91.5233
ENSMUSG00000015053	Gata2	-0.629443	6.61337e-06	0.000310623	6.36664	3.03326	5.85122	4.83278	3.54049	3.718	3.77247	4.21117
ENSMUSG00000027895	Kcnc4	-0.629925	0.00304243	0.0318518	27.1957	7.25982	11.7443	19.1924	13.8815	12.6169	9.6816	11.7611
ENSMUSG00000027333	Smox	-0.629945	3.21345e-09	5.86816e-07	19.4686	8.89216	16.5362	18.1388	12.7551	11.9922	11.5079	11.4285
ENSMUSG00000025497	Cdhr5	-0.631198	0.000243577	0.00513128	13.869	6.18252	10.8219	9.39874	6.24663	8.86699	8.71627	6.80192
ENSMUSG00000024393	Prrc2a	-0.63237	5.76287e-08	6.267e-06	111.035	43.7437	82.8229	76.1801	57.2279	57.6397	58.3065	63.2312
ENSMUSG00000078813	Leng1	-0.633586	0.0238179	0.127837	2.77837	3.08965	3.08228	3.11827	2.11511	2.83519	2.73591	2.24742
ENSMUSG00000038803	Ost4	-0.63653	0.00457985	0.0426486	61.0734	59.8106	64.3828	71.2217	52.1337	59.9828	50.674	49.0588
ENSMUSG00000069266	Hist1h4b	-0.637563	0.00706415	0.0570759	11.8124	6.14852	15.3509	14.3825	8.33679	9.04333	6.61513	11.7211
ENSMUSG00000063382	Bcl9l	-0.637741	0.000283267	0.00569809	62.5347	21.2359	34.6822	33.0964	27.9988	25.4812	28.3354	31.7135
ENSMUSG00000024548	Setbp1	-0.638271	0.000362398	0.00682984	17.7731	14.6843	19.1915	22.0642	14.8509	14.6124	14.4049	15.1718
ENSMUSG00000038526	Car14	-0.638463	0.00452197	0.0422809	4.86281	2.58879	5.80748	4.91772	5.03525	2.85387	3.44333	2.42397
ENSMUSG00000050919	Zfp366	-0.638805	0.0167936	0.101816	0.474367	0.322714	0.745746	0.562944	0.31116	0.371496	0.396262	0.506833
ENSMUSG00000033739	Fkbpl	-0.639052	0.0358137	0.164272	3.17839	4.68492	4.66155	5.91039	3.75274	3.62701	3.56135	4.24489
ENSMUSG00000019997	Ctgf	-0.640306	0.0001863	0.00419624	13.8032	9.19038	22.2374	20.9214	14.4617	11.2083	12.0509	12.2611
ENSMUSG00000031871	Cdh5	-0.640768	0.000676349	0.0106374	4.41307	3.57056	6.49419	4.99434	3.99319	3.30644	3.96859	3.92048
ENSMUSG00000030551	Nr2f2	-0.640769	7.83179e-11	2.22441e-08	19.7964	10.1177	20.4834	18.9792	12.7779	12.5949	12.9935	13.9785
ENSMUSG00000017400	Stac2	-0.641728	0.00115216	0.0158868	3.6979	2.35093	4.1485	2.7976	2.192	2.35423	2.66288	2.77225
ENSMUSG00000046574	Prr12	-0.642196	4.72305e-05	0.00147204	20.2096	6.97307	12.7272	11.7568	9.06717	10.0119	8.77383	10.5366
ENSMUSG00000074646	6430550D23Rik	-0.642559	0.00541391	0.0476148	1.88176	0.973522	2.12665	1.82245	1.14457	0.976076	1.62178	1.3083
ENSMUSG00000040852	Plekhh2	-0.643601	5.94167e-09	9.75809e-07	5.98265	2.83586	7.00435	6.4286	4.36424	4.1415	4.00453	4.02984
ENSMUSG00000001288	Rarg	-0.644404	7.32942e-06	0.000335763	20.8859	6.19954	15.7829	15.5989	9.07844	10.6209	11.2814	11.338
ENSMUSG00000031586	Rbpms	-0.644606	1.76353e-11	6.17032e-09	35.7518	17.2207	35.0706	34.4329	22.4545	21.4895	22.5887	25.2211
ENSMUSG00000032289	Thsd4	-0.644817	3.04538e-05	0.00104138	2.59823	0.841197	2.52725	2.26105	1.66313	1.16288	1.56472	1.59352
ENSMUSG00000027907	S100a11	-0.646159	0.000697725	0.0108666	156.011	138.23	265.898	261.644	152.467	164.908	165.792	153.029
ENSMUSG00000039852	Rere	-0.646347	2.90418e-05	0.00100629	40.0887	18.7048	27.6911	25.6938	20.3259	22.054	20.9751	22.5874
ENSMUSG00000036782	Klhl13	-0.64673	0.0162745	0.0997427	1.1344	0.706087	1.33447	0.976988	0.928971	0.485444	0.97296	0.745562
ENSMUSG00000029478	Ncor2	-0.646956	0.000127073	0.00315941	54.6052	22.7153	37.4233	30.0001	26.6211	26.0196	25.2497	31.8252
ENSMUSG00000079602	9230102O04Rik	-0.647305	0.027611	0.140216	5.07428	1.96652	6.694	3.04674	3.59263	3.5846	2.70553	2.54093
ENSMUSG00000018893	Mb	-0.648136	0.00231484	0.0261511	4.5621	2.00011	5.03791	4.40852	3.53115	2.93988	2.41848	3.02722
ENSMUSG00000063605	Ccdc102a	-0.649456	0.00624587	0.0524962	2.44761	0.993231	2.01531	1.44796	1.35031	1.26424	1.05541	1.4778
ENSMUSG00000078193	Gm2000	-0.649808	0.0052535	0.0466955	14.6735	14.5704	26.6075	25.8064	17.5526	15.2224	15.7376	14.5376
ENSMUSG00000049327	Kmt5a	-0.64992	1.67542e-05	0.000647168	31.4035	21.8063	34.2651	34.3849	22.4272	22.382	26.2077	23.536
ENSMUSG00000035258	Abi3bp	-0.650673	0.00366391	0.036341	1.72245	1.67631	2.82341	2.51859	1.75124	1.84994	1.7017	1.50132
ENSMUSG00000053519	Kcnip1	-0.651107	0.0115158	0.0790787	1.23216	1.11766	2.74968	1.70768	1.45482	1.09177	1.37765	1.26105
ENSMUSG00000015619	Gata3	-0.651503	2.02503e-06	0.000122899	23.7813	7.47379	20.2195	15.4851	12.1476	12.8948	11.4058	12.0555
ENSMUSG00000041073	Nacad	-0.652302	0.0295343	0.145752	0.70379	0.171521	0.605087	0.603262	0.257091	0.429258	0.338009	0.475602
ENSMUSG00000006362	Cbfa2t3	-0.653459	0.00448519	0.0419928	0.962821	0.468956	0.812345	0.620996	0.597436	0.443032	0.43258	0.682899
ENSMUSG00000025867	Cplx2	-0.653692	0.00108709	0.0151615	1.98753	0.727509	1.55467	1.14564	1.00742	0.879736	0.996749	1.10547
ENSMUSG00000034932	Mrpl54	-0.654369	0.000113658	0.00288532	35.479	24.1217	43.7229	41.8498	28.7133	30.8417	28.9868	21.9849
ENSMUSG00000064351	mt-Co1	-0.65511	0.0114506	0.0788029	2593.1	3508.05	5665.69	6897.2	4088.05	3836.7	3440.57	3364.92
ENSMUSG00000024991	Eif3a	-0.655962	0.00802799	0.0622588	37.9034	47.7488	54.8563	52.4425	37.9951	40.4004	42.4697	39.2057
ENSMUSG00000052382	Rnase9	-0.658265	0.00287339	0.0306566	1301.9	1226.71	1761.92	2747.9	1362.57	1235.44	1573.66	1288.15
ENSMUSG00000029155	Spata18	-0.66008	0.00211654	0.0246944	5.46193	3.85643	5.04703	7.23291	5.01978	3.80137	3.19634	4.53291
ENSMUSG00000069873	4930438A08Rik	-0.660255	0.00227782	0.0259026	2.75108	1.12981	2.41259	3.12655	1.80271	1.32696	2.04479	1.681
ENSMUSG00000029062	Cdk11b	-0.661094	0.0047556	0.0438002	14.344	14.0769	15.4898	13.9847	11.5057	12.6718	12.5649	10.5618
ENSMUSG00000040721	Zfhx2	-0.662299	0.000325609	0.00630381	3.24867	1.23257	2.10459	1.66606	1.4325	1.49852	1.60911	1.57192
ENSMUSG00000026544	Dusp23	-0.662494	8.66772e-06	0.000383253	13.051	6.32963	12.6784	11.1931	6.99498	7.06222	8.96788	8.89446
ENSMUSG00000038976	Ppp1r9b	-0.664405	1.19562e-06	7.84367e-05	26.4675	9.62808	17.7161	19.6822	12.2903	12.6974	13.1617	15.5338
ENSMUSG00000028799	Zfp362	-0.665408	2.42961e-06	0.000142715	29.0683	15.1095	22.6838	22.6324	15.913	16.3327	17.001	18.4651
ENSMUSG00000026083	Eif5b	-0.665974	0.0103645	0.0741068	7.36969	10.1159	11.568	11.4619	7.91239	8.68791	8.85096	7.95498
ENSMUSG00000022229	Atp12a	-0.666089	0.0279326	0.141149	0.571068	0.308983	0.587756	0.893305	0.569772	0.342986	0.393993	0.430993
ENSMUSG00000028478	Clta	-0.666131	0.000648096	0.0103204	68.7685	63.4776	85.8055	85.7283	57.3295	61.5599	62.8254	59.0041
ENSMUSG00000040462	Os9	-0.666981	1.83107e-05	0.000696151	96.8938	62.4005	85.327	89.7006	61.583	60.2102	66.4059	70.3565
ENSMUSG00000035048	Anapc13	-0.66783	0.00122433	0.0166804	29.5829	27.225	36.0846	37.6703	24.4417	28.9676	27.0764	22.3536
ENSMUSG00000024002	Brd4	-0.667886	4.67305e-05	0.00146325	23.9139	14.9102	19.347	20.254	14.8728	13.8209	15.4271	16.5907
ENSMUSG00000038398	Upf3a	-0.668618	0.00880087	0.0662728	3.53148	3.4654	3.5942	3.05337	2.9714	2.63778	2.90644	2.54734
ENSMUSG00000055407	Map6	-0.669567	0.0293718	0.145274	0.50674	0.294578	0.353908	0.456391	0.322898	0.247828	0.34597	0.276817
ENSMUSG00000031879	Fam96b	-0.670195	8.47405e-05	0.00231426	10.6695	6.81369	12.5818	12.3699	8.86915	7.45284	8.21154	7.04707
ENSMUSG00000024474	Ik	-0.670554	0.0125629	0.0836208	29.2344	40.9299	40.8264	44.1953	30.7425	33.0893	33.7705	31.5864
ENSMUSG00000070473	Cldn3	-0.670738	9.31167e-08	9.60693e-06	203.449	113.966	170.204	193.384	130.233	128.861	128.363	127.783
ENSMUSG00000040048	Ndufb10	-0.671003	0.0139295	0.0892718	28.6129	36.4023	34.5879	33.2317	30.081	28.4279	25.658	26.7407
ENSMUSG00000063873	Slc24a3	-0.671046	1.95176e-07	1.78482e-05	7.84539	3.59919	8.12974	6.10175	4.80758	4.217	5.02194	4.78036
ENSMUSG00000028010	Gar1	-0.671655	0.0116467	0.0795399	9.24743	6.24165	5.61686	6.05717	6.87461	5.22304	4.82126	4.50944
ENSMUSG00000036036	Zfp57	-0.672858	0.00929354	0.0687963	1.44002	0.73431	2.14552	1.40811	0.764661	1.1216	1.21724	1.04886
ENSMUSG00000040761	Spen	-0.67458	3.15112e-06	0.000177329	13.1377	6.83476	10.5048	9.54587	6.98055	7.5456	7.54473	8.12524
ENSMUSG00000023048	Prr13	-0.674716	2.34803e-07	2.12308e-05	38.2139	17.9847	28.4413	30.2996	22.0647	22.2294	20.7043	20.2999
ENSMUSG00000046999	1110032F04Rik	-0.67575	0.00938873	0.0691808	1.65787	0.5326	1.9362	1.61758	1.12977	0.683177	0.98097	1.29872
ENSMUSG00000039457	Ppl	-0.676002	0.000130546	0.00320615	11.9535	8.54308	10.273	12.5613	8.15167	8.68734	7.92609	8.81453
ENSMUSG00000043969	Emx2	-0.676589	1.95574e-08	2.6827e-06	41.3858	22.8631	36.0467	40.5043	28.2392	24.508	26.7851	25.9606
ENSMUSG00000009248	Ascl2	-0.676861	0.0495971	0.201522	1.25749	0.665372	1.12104	2.27842	1.27852	0.675286	1.03024	0.883917
ENSMUSG00000000282	Mnt	-0.677035	6.40121e-06	0.000303016	22.4511	8.97413	14.0234	14.6062	11.6957	10.862	10.1823	11.5102
ENSMUSG00000070509	Rgma	-0.677213	1.03893e-06	7.06534e-05	5.16471	2.42497	4.93655	4.3653	2.7504	3.09797	3.05146	3.43397
ENSMUSG00000041096	Tspyl2	-0.677791	0.000270783	0.00551201	34.6978	28.0474	33.4087	40.6578	27.0064	26.8881	27.4561	25.6416
ENSMUSG00000001964	Emd	-0.678438	9.23274e-06	0.000402153	26.2379	18.1255	28.8203	31.6957	22.4936	19.5362	18.6911	18.5719
ENSMUSG00000034341	Wbp2	-0.679132	2.83602e-05	0.000990843	87.6112	55.9778	74.4106	74.5202	53.2163	58.317	55.7447	57.6176
ENSMUSG00000011254	Thg1l	-0.679174	0.000369396	0.00692388	5.40845	4.33949	6.75854	5.93083	3.97165	4.21491	4.49589	4.36325
ENSMUSG00000024867	Pip5k1b	-0.680264	4.94691e-05	0.00152138	44.2266	31.9884	55.6272	71.9849	41.0851	36.2788	39.1449	36.0378
ENSMUSG00000035566	Pcdh17	-0.681316	0.0159038	0.0979078	0.451001	0.13989	0.876873	0.554659	0.341058	0.313527	0.386486	0.361764
ENSMUSG00000084786	Ubl5	-0.682957	8.24616e-05	0.00225713	23.4986	17.1638	35.6428	39.5	23.0137	22.0943	20.782	19.8424
ENSMUSG00000028699	Tspan1	-0.68416	8.31228e-10	1.8581e-07	29.3665	11.6822	26.228	25.1451	18.1409	15.1177	18.3754	14.8944
ENSMUSG00000037979	Ccdc92	-0.686345	0.0005683	0.0095258	5.08877	2.80691	3.75517	5.18848	2.48931	3.72527	2.94987	3.28139
ENSMUSG00000000567	Sox9	-0.686671	2.98582e-05	0.0010265	17.6719	11.7141	18.2334	16.1514	11.3178	10.9268	11.6556	14.4785
ENSMUSG00000025409	Mbd6	-0.687111	0.00115226	0.0158868	27.9151	7.27748	13.9044	11.8524	10.3452	10.0021	11.5373	11.1854
ENSMUSG00000045216	Hs6st1	-0.687256	2.88436e-08	3.58939e-06	52.1464	22.0492	38.002	46.0768	27.7485	25.7553	28.5602	32.9437
ENSMUSG00000005732	Ranbp1	-0.68732	0.0100709	0.0726922	25.5499	36.6285	42.3672	45.2932	27.6978	32.6524	30.9282	29.6551
ENSMUSG00000066456	Hmgn3	-0.688505	0.0131006	0.0861077	2.81655	3.07095	6.2589	4.51995	2.6649	3.16541	3.74104	2.93732
ENSMUSG00000074121	Ntf5	-0.690504	0.000630983	0.0101352	2.69136	1.20463	3.22285	3.10483	1.68604	1.89795	1.88291	1.85015
ENSMUSG00000024552	Slc14a2	-0.690829	4.21079e-06	0.000220852	8.1826	3.57777	5.92254	7.87875	4.503	4.99619	4.80589	4.18546
ENSMUSG00000042510	AA986860	-0.691226	0.0105293	0.074888	1.46319	0.428406	1.01413	1.18102	0.743522	0.824289	0.849758	0.47806
ENSMUSG00000039205	Ciz1	-0.692354	7.05725e-05	0.00200679	17.8675	12.403	16.4106	15.6201	11.3953	11.8052	11.428	13.1419
ENSMUSG00000062012	Zfp13	-0.693143	2.46999e-08	3.20594e-06	22.9507	13.1948	21.9519	23.7547	14.6376	14.6627	16.143	14.8567
ENSMUSG00000043059	Zfp513	-0.694088	1.85383e-05	0.000701493	11.723	4.79319	7.47654	8.09143	5.64492	5.32067	6.2429	6.03642
ENSMUSG00000048148	Nwd1	-0.69507	1.3796e-05	0.000555106	5.05493	2.01444	3.17848	3.60845	3.02388	2.51074	2.18562	2.33994
ENSMUSG00000054708	Ankrd24	-0.696233	1.02341e-05	0.000434222	7.81235	4.70682	6.34881	6.72699	4.74141	4.54521	4.96303	4.90954
ENSMUSG00000052920	Prkg1	-0.70009	0.0015563	0.0198479	1.72896	1.52015	2.74337	2.32757	1.33606	1.52302	1.60289	1.71083
ENSMUSG00000000782	Tcf7	-0.700329	3.87051e-06	0.000208575	108.344	71.7422	99.5456	125.974	76.5612	69.4942	79.5928	78.7253
ENSMUSG00000034868	Myl12b	-0.700855	0.00469395	0.0433948	78.0742	89.9168	89.03	93.4429	70.843	72.8756	73.5518	66.3035
ENSMUSG00000029761	Cald1	-0.702714	0.00137516	0.0181614	10.9353	10.9861	13.8146	12.4228	9.8245	8.84856	10.3742	8.76693
ENSMUSG00000060019	Gm10073	-0.702807	0.00142591	0.0186549	31.1167	13.8412	29.8396	35.5701	24.0221	26.2218	15.198	13.386
ENSMUSG00000039168	Dap	-0.703691	6.08216e-06	0.000292501	137.618	103.064	157.774	158.429	106.762	104.637	104.21	104.591
ENSMUSG00000047557	Lxn	-0.707011	0.0241249	0.128712	3.25632	4.52742	6.3156	4.7309	4.1669	3.65502	4.19857	2.60263
ENSMUSG00000035621	Midn	-0.709328	2.72513e-07	2.39237e-05	32.7147	11.2773	22.0203	21.2762	14.7591	15.0129	14.7453	17.1293
ENSMUSG00000020022	Ndufa12	-0.709601	0.016605	0.101028	7.48698	11.0641	10.7193	11.8486	9.12405	8.42169	8.71898	6.79947
ENSMUSG00000023046	Igfbp6	-0.710161	2.62051e-06	0.000152078	24.2355	15.503	31.9956	33.1163	19.8225	19.9808	18.5437	17.4529
ENSMUSG00000026851	BC005624	-0.710653	0.0048938	0.0446569	13.8529	15.6097	15.5049	15.7155	13.379	12.3256	11.423	11.4124
ENSMUSG00000036466	Megf11	-0.711632	0.0086981	0.0657244	0.399887	0.319737	0.530014	0.460998	0.267551	0.30422	0.31306	0.356795
ENSMUSG00000021127	Zfp36l1	-0.711657	5.01882e-09	8.41418e-07	30.4945	18.3429	33.9704	33.6441	20.6109	20.4125	20.7058	23.0596
ENSMUSG00000031370	Zrsr2	-0.713814	0.00257927	0.028304	4.16003	4.67504	6.16881	5.7735	4.41637	4.2392	3.84842	3.56598
ENSMUSG00000040037	Negr1	-0.714456	0.0174952	0.104754	0.405032	0.229621	0.675571	0.540745	0.318816	0.258289	0.351356	0.375811
ENSMUSG00000015605	Srf	-0.715268	4.57293e-08	5.13487e-06	12.9657	5.03192	9.57185	9.07551	6.29111	6.107	6.36881	7.20955
ENSMUSG00000001911	Nfix	-0.715467	9.84024e-07	6.88589e-05	39.6427	16.2841	30.1228	23.3261	18.7002	18.9389	19.6275	21.1508
ENSMUSG00000028433	Ubap2	-0.715781	3.2664e-10	8.04668e-08	33.3262	17.7116	29.8155	30.8474	20.2361	18.5124	20.4527	21.8957
ENSMUSG00000023991	Foxp4	-0.716805	7.49519e-06	0.000339491	11.2369	4.13923	7.63429	6.57759	4.83338	5.45441	5.08347	5.59102
ENSMUSG00000038967	Pdk2	-0.716843	6.6178e-08	7.16444e-06	141.187	83.9897	124.946	133.024	87.6203	89.3946	87.1981	92.2209
ENSMUSG00000000120	Ngfr	-0.72032	0.0400105	0.176043	0.654591	0.420581	1.39797	0.595757	0.461015	0.373492	0.60686	0.724576
ENSMUSG00000021057	Akap5	-0.72128	0.043478	0.185975	0.195296	0.193923	0.338507	0.249446	0.168282	0.222861	0.145457	0.178211
ENSMUSG00000007817	Zmiz1	-0.721961	9.23754e-05	0.00245609	42.216	23.1124	28.1439	27.9705	21.1004	22.1634	21.4957	25.6888
ENSMUSG00000058064	Gm10036	-0.722636	0.00479559	0.0440545	7.18523	7.24448	11.2407	11.3497	6.16333	7.0641	7.60747	6.3405
ENSMUSG00000027210	Meis2	-0.722855	4.1731e-05	0.00134329	2.3861	1.34579	3.56817	3.08059	1.78187	1.5401	2.02566	1.96108
ENSMUSG00000027679	Dnajc19	-0.723001	0.00935951	0.0690789	3.06425	4.0292	4.80771	5.46824	3.52294	4.06601	3.03594	2.77038
ENSMUSG00000018672	Copz2	-0.726739	3.19763e-05	0.00108119	21.4722	16.351	25.438	29.1002	15.4559	17.9559	16.7541	17.3772
ENSMUSG00000021070	Bdkrb2	-0.733573	0.0315253	0.151279	0.532246	0.301741	0.39796	0.389129	0.331669	0.267958	0.24368	0.314266
ENSMUSG00000031157	Pqbp1	-0.734037	0.00942914	0.0693174	9.8935	13.8792	14.4046	13.3074	10.4542	11.3392	9.5214	9.54051
ENSMUSG00000026679	Enkur	-0.735472	0.0212146	0.118237	1.83182	1.78135	2.08153	2.88941	2.04269	1.07344	1.54134	1.60919
ENSMUSG00000072647	Adam1a	-0.738986	0.00572013	0.0494834	1.0867	0.829132	1.16215	1.10107	0.946712	0.561914	0.626003	0.892766
ENSMUSG00000049939	Lrrc4	-0.739357	0.00558205	0.0486681	0.886721	0.717434	1.46106	1.13581	0.659195	0.955663	0.726475	0.659307
ENSMUSG00000022346	Myc	-0.739809	0.00437073	0.0412539	2.43741	1.56606	1.81223	2.05803	1.01924	1.56456	1.74731	1.33495
ENSMUSG00000032243	Itga11	-0.745293	0.00856166	0.0650191	0.824293	0.230268	0.502266	0.684292	0.359678	0.395341	0.460007	0.308348
ENSMUSG00000113450	Zfp935	-0.745355	0.0172882	0.103746	1.14339	1.19379	1.281	1.75063	1.06251	0.815486	1.30756	0.751471
ENSMUSG00000044786	Zfp36	-0.74859	4.88325e-06	0.000249785	10.9786	4.83928	7.50995	7.47332	4.95863	4.85589	5.8395	5.97984
ENSMUSG00000052727	Map1b	-0.749218	0.000127006	0.00315941	87.9708	76.2091	97.9686	94.0872	60.7564	69.8164	71.6034	65.6671
ENSMUSG00000028849	Map7d1	-0.750198	2.53999e-08	3.24447e-06	15.1104	7.23876	13.3194	10.4724	8.0792	7.82311	8.33053	8.24709
ENSMUSG00000053835	H2-T24	-0.750945	0.0306067	0.148823	0.680122	0.664217	1.14379	1.11728	0.84942	0.434627	0.534924	0.754206
ENSMUSG00000002658	Gtf2f1	-0.753905	0.00468724	0.0433774	19.3606	25.4119	27.2458	24.6982	18.5051	20.318	19.799	17.0209
ENSMUSG00000074215	Gm10643	-0.753911	0.00564029	0.0490518	2.18322	1.54785	1.76662	2.80706	1.42714	1.71819	1.4186	1.33142
ENSMUSG00000066108	Muc5b	-0.755817	7.63438e-06	0.000344503	275.162	148.528	174.297	243.486	145.27	138.644	156.366	165.821
ENSMUSG00000046191	Pcdhb20	-0.756071	0.011321	0.0783804	0.750561	0.621558	1.43512	1.31592	0.79976	0.894567	0.737906	0.462399
ENSMUSG00000068290	Ddrgk1	-0.756385	0.000364585	0.00686017	48.9081	47.3208	54.1965	63.6892	40.2084	41.3113	41.6802	37.8164
ENSMUSG00000028648	Ndufs5	-0.756657	0.000548631	0.00927525	17.2845	15.8169	32.3493	30.9456	16.1592	15.4407	17.88	19.0271
ENSMUSG00000038700	Hoxb5	-0.757651	1.85007e-07	1.70475e-05	24.3112	8.07704	16.4164	17.1788	9.95525	11.4034	10.6658	12.7712
ENSMUSG00000073888	Ccl27a	-0.75864	0.000246075	0.00517036	8.34392	5.82057	8.508	7.47193	5.51618	5.84901	4.44342	5.75451
ENSMUSG00000045377	Tmem88	-0.761215	0.0177657	0.106001	1.50091	0.433958	1.54091	1.70325	0.794999	0.599466	1.01448	1.04025
ENSMUSG00000005148	Klf5	-0.76193	0.00126116	0.0170623	1.15109	0.796481	1.38522	1.49288	1.02688	0.707306	0.856019	0.778754
ENSMUSG00000032487	Ptgs2	-0.76238	0.0224204	0.12271	3.66591	0.633812	1.13397	1.1814	0.921634	1.004	1.19044	1.21065
ENSMUSG00000045763	Basp1	-0.762882	1.20475e-05	0.000497181	106.626	84.71	118.397	114.408	75.7575	79.4983	81.0908	74.9495
ENSMUSG00000079277	Hoxd3	-0.767234	1.56774e-08	2.26426e-06	7.72013	4.03503	6.45333	7.52228	4.72815	4.4049	4.37505	4.35931
ENSMUSG00000055633	Zfp580	-0.767255	8.99747e-05	0.00241621	9.8574	3.20154	7.41398	8.19505	4.89208	4.63547	3.81613	6.00612
ENSMUSG00000036371	Serbp1	-0.769191	0.0360879	0.164913	8.83472	12.531	13.6044	14.4489	9.68486	9.73588	9.63932	9.13152
ENSMUSG00000068758	Il3ra	-0.769197	0.00475693	0.0438002	2.3847	1.15326	1.65473	1.46879	0.943588	1.5801	0.924351	1.20113
ENSMUSG00000005575	Ube2m	-0.771321	1.18837e-12	5.85503e-10	51.215	25.4958	46.8428	51.124	30.3989	27.013	33.0721	29.9158
ENSMUSG00000028639	Ybx1	-0.771479	0.00178019	0.0218383	95.86	116.482	135.048	120.508	84.1251	95.0769	93.2042	85.9229
ENSMUSG00000071855	Ccdc112	-0.77152	0.0182218	0.107619	1.44111	2.47822	2.40369	2.42788	1.77242	1.6687	1.75365	1.56
ENSMUSG00000053175	Bcl3	-0.777521	0.0152845	0.09525	1.92522	0.700953	0.972577	1.24843	0.858735	0.549241	0.97267	0.889555
ENSMUSG00000035504	Reep6	-0.779684	0.000188226	0.00422319	22.6637	17.6191	19.5835	20.9784	13.1909	15.3703	13.6341	17.1168
ENSMUSG00000028484	Psip1	-0.780601	0.00416634	0.0398408	14.0597	21.7742	26.5299	28.8907	17.1237	16.2942	19.0285	16.5303
ENSMUSG00000024985	Tcf7l2	-0.780688	1.10958e-06	7.41371e-05	4.50315	2.14457	4.2342	3.17202	2.39043	2.2164	2.23954	2.77823
ENSMUSG00000010376	Nedd8	-0.781779	4.25122e-07	3.44123e-05	64.9081	47.1196	81.1445	83.1531	49.6456	44.8035	52.5879	47.2436
ENSMUSG00000043068	Fam89a	-0.78219	0.000370138	0.00693241	4.03726	2.39444	4.2945	4.89078	2.8694	2.0251	2.47166	3.30815
ENSMUSG00000031880	Rrad	-0.782727	0.00731566	0.0583093	1.50567	0.822297	1.84023	1.26114	1.00739	0.90205	0.894338	0.899611
ENSMUSG00000025128	Bhlhe22	-0.783985	0.000532965	0.00907394	1.38462	0.935253	1.75303	1.49645	1.02933	0.749512	1.10531	0.933346
ENSMUSG00000018476	Kdm6b	-0.785142	4.43707e-06	0.00023136	33.5077	12.4038	19.6697	17.7792	14.355	13.6111	13.8358	15.0781
ENSMUSG00000021453	Gadd45g	-0.785202	0.000695191	0.0108349	11.7503	10.6835	10.8928	13.4182	8.09657	9.04461	8.30992	8.68962
ENSMUSG00000027908	Tchhl1	-0.785536	0.0235348	0.126928	0.948167	1.10765	1.2642	2.29792	1.08935	1.01642	1.15346	0.71415
ENSMUSG00000003354	Ccdc65	-0.787503	0.0326213	0.154457	0.785199	0.524678	1.04412	0.71284	0.595397	0.465934	0.360248	0.690578
ENSMUSG00000060244	Alyref2	-0.788377	0.0195214	0.112237	2.19165	2.57663	2.64444	3.77979	1.50796	2.97991	1.91019	1.69395
ENSMUSG00000045996	Polr2k	-0.78902	0.028514	0.142751	2.07418	2.79228	4.15268	4.91041	2.86364	2.70508	2.18487	2.07728
ENSMUSG00000039377	Hlx	-0.790899	0.0328916	0.155061	0.703577	0.401827	0.738887	0.81673	0.261522	0.356838	0.512381	0.647688
ENSMUSG00000050164	Mchr1	-0.792184	0.0435772	0.186136	0.569736	0.244041	0.557065	0.645074	0.332786	0.340556	0.288956	0.389037
ENSMUSG00000031841	Cdh13	-0.793753	5.11971e-05	0.00156061	1.40438	0.935748	1.90715	1.57402	1.02953	0.905174	1.01209	1.01934
ENSMUSG00000051550	Zfp579	-0.795279	1.58491e-05	0.000619881	14.6435	4.29057	9.14103	8.37708	5.15937	6.0963	5.66642	7.04498
ENSMUSG00000060969	Irx1	-0.796338	1.07333e-07	1.0842e-05	8.15495	3.66453	6.8974	7.94848	4.49105	4.90991	3.66852	4.87842
ENSMUSG00000059518	Znhit1	-0.796579	0.000425853	0.00771842	8.79605	8.52468	12.0118	11.5246	6.1372	7.23379	8.21294	7.51622
ENSMUSG00000020514	Mrpl22	-0.79805	1.93614e-05	0.000725295	12.086	8.24079	12.8622	13.9507	9.16816	8.16254	8.01577	7.07378
ENSMUSG00000027474	Ccm2l	-0.800541	0.0140883	0.0900305	1.66627	0.97023	1.3492	0.844152	0.58065	0.683339	0.981202	1.07024
ENSMUSG00000045672	Col27a1	-0.801194	5.96667e-06	0.00029148	5.73958	2.04429	3.49984	3.60728	2.16531	2.50954	2.24895	3.00437
ENSMUSG00000053367	Epp13	-0.801914	1.41674e-08	2.08554e-06	1790.82	598.683	1275.87	1694.46	1039.05	883.376	810.761	768.552
ENSMUSG00000055717	Slain1	-0.805305	0.00265217	0.0288432	1.74164	0.426295	1.29746	1.09802	0.878581	0.780793	0.730436	0.594629
ENSMUSG00000046056	Sbsn	-0.807047	0.00807457	0.0625197	2.36479	1.95352	1.98188	1.53869	1.88357	1.04639	1.24549	1.49942
ENSMUSG00000045106	Ccdc73	-0.808757	0.0452859	0.190602	0.285968	0.406157	0.412055	0.487999	0.201402	0.360683	0.320606	0.244601
ENSMUSG00000035357	Pdzrn3	-0.811254	4.13151e-07	3.39931e-05	3.25444	2.08172	4.0589	3.5642	2.37099	1.94768	2.2397	2.19855
ENSMUSG00000073102	Drc1	-0.811601	0.0094008	0.0691934	1.03299	0.648273	0.822109	1.01257	0.83044	0.520863	0.452679	0.5971
ENSMUSG00000049422	Chchd10	-0.814594	3.75684e-08	4.40279e-06	43.7229	28.2975	43.3746	41.3476	27.1805	26.9957	25.0031	29.2127
ENSMUSG00000029623	Pdap1	-0.815772	0.0012263	0.0166873	16.4381	15.8347	14.4629	13.9981	11.7163	11.4925	10.6311	11.4097
ENSMUSG00000043633	Fam221b	-0.818703	0.0218093	0.120544	0.364085	0.389881	0.860304	0.852566	0.456745	0.432786	0.273431	0.50758
ENSMUSG00000028851	Nudc	-0.819196	0.00104087	0.0147153	24.4481	23.3593	21.0817	22.1327	15.8443	17.1923	17.443	16.7741
ENSMUSG00000069892	9930111J21Rik2	-0.819614	0.0320732	0.152875	0.287631	0.535299	0.649748	0.568128	0.30968	0.26032	0.414421	0.493044
ENSMUSG00000029309	Sparcl1	-0.822326	3.54798e-05	0.0011782	20.6118	19.2705	29.9566	24.9274	18.3539	15.1733	16.9398	16.5368
ENSMUSG00000013921	Clip3	-0.823504	0.000230542	0.00493418	2.93208	1.66429	2.40958	2.04131	1.64482	1.35479	1.20847	1.94317
ENSMUSG00000061518	Cox5b	-0.824269	8.90173e-05	0.0023985	32.803	32.0112	44.8894	42.1276	25.7124	28.5055	28.5054	24.7327
ENSMUSG00000042712	Tceal9	-0.82736	0.000969379	0.0139385	39.7294	51.7268	63.5659	67.4924	45.0822	42.0132	37.8473	36.6436
ENSMUSG00000031766	Slc12a3	-0.829593	0.0044259	0.0415598	1.65274	0.513254	0.686795	1.14617	0.767913	0.770126	0.609329	0.460826
ENSMUSG00000020211	Sf3a2	-0.830118	1.81779e-08	2.52213e-06	18.0792	9.479	14.425	14.3792	8.76407	9.27479	9.23003	10.6161
ENSMUSG00000014329	Bicc1	-0.831143	2.23638e-10	5.80546e-08	6.08803	3.37088	6.58317	5.62291	4.02211	3.15561	3.49237	3.76157
ENSMUSG00000029610	Aimp2	-0.834626	2.74306e-05	0.00096676	10.3694	6.88774	14.449	16.8916	10.1107	7.31703	7.83881	6.89589
ENSMUSG00000037166	Ppp1r14a	-0.836029	5.3563e-05	0.00161734	11.4973	3.2118	13.8687	10.4675	6.82845	5.91831	6.65511	5.19687
ENSMUSG00000027422	Rrbp1	-0.83639	0.000292549	0.00583695	60.4847	58.8198	59.2405	61.4292	41.0948	44.5797	47.3653	41.796
ENSMUSG00000025515	Muc2	-0.837472	0.000174503	0.0040199	4.62553	1.9813	2.75724	3.13542	2.44326	1.85208	1.51252	2.48246
ENSMUSG00000063172	Hspb11	-0.839556	0.0121623	0.081675	2.72697	5.07857	6.18278	7.43214	3.65786	4.41977	4.30643	2.94694
ENSMUSG00000056671	Prelid2	-0.839981	0.00612929	0.0519023	5.73933	7.37515	8.65803	11.9627	4.93713	5.05241	7.92645	5.56501
ENSMUSG00000038370	Pcp4l1	-0.846188	0.000165955	0.00385609	4.29116	2.70874	3.79088	4.3123	1.80491	2.92092	2.65217	2.62686
ENSMUSG00000031954	Cfdp1	-0.846924	0.00203006	0.0239422	16.8307	25.0598	28.1336	30.9341	19.1615	19.3213	17.7937	16.9086
ENSMUSG00000029581	Fscn1	-0.850852	0.000856673	0.0127744	2.13034	1.05509	3.21123	2.03859	1.58371	0.93696	1.12721	1.78198
ENSMUSG00000024268	Celf4	-0.853563	4.84156e-05	0.00149469	4.30906	2.99774	3.76285	5.89364	3.34699	3.18775	2.47124	2.38638
ENSMUSG00000048758	Rpl29	-0.854054	2.88702e-05	0.00100336	198.807	196.794	296.386	280.614	152.521	172.035	184.059	164.803
ENSMUSG00000037664	Cdkn1c	-0.854804	0.000247287	0.0051913	3.59101	2.84897	4.82402	3.54357	2.36781	1.88859	2.91647	2.71648
ENSMUSG00000024403	Atp6v1g2	-0.856629	2.57787e-07	2.28805e-05	10.9764	7.49831	11.6884	11.0448	6.85858	6.0469	7.70073	6.87483
ENSMUSG00000070808	Bicra	-0.857287	4.51743e-05	0.00142562	6.48911	2.7066	3.64563	3.13852	2.68854	2.57744	2.39386	2.8875
ENSMUSG00000041117	Ccdc8	-0.857917	0.000153632	0.00362915	1.17265	0.65034	1.40003	1.09394	0.56435	0.873333	0.586555	0.778817
ENSMUSG00000021520	Uqcrb	-0.864756	0.0365787	0.166368	37.5078	67.3695	106.323	123.656	57.4073	55.7503	58.3602	59.861
ENSMUSG00000032589	Bsn	-0.865361	3.68133e-08	4.33535e-06	0.938573	0.425959	0.710125	0.849343	0.519153	0.454771	0.424147	0.48423
ENSMUSG00000100642	Gm28230	-0.866605	1.17821e-08	1.76672e-06	4.3086	2.24926	5.24952	5.43876	2.72133	2.78487	2.95083	2.54213
ENSMUSG00000069662	Marcks	-0.878984	1.00242e-09	2.16075e-07	12.1127	7.00993	15.4422	16.1657	8.69943	6.74385	8.26577	8.67754
ENSMUSG00000066512	Klk1b5	-0.883995	0.0019993	0.0236372	2.26178	1.20644	1.79422	2.02936	1.04692	1.55835	1.04889	1.0199
ENSMUSG00000021606	Ndufs6	-0.888178	0.00062208	0.0100626	20.9371	27.9123	39.1795	38.1374	24.8337	22.5501	20.2372	19.0408
ENSMUSG00000038236	Hoxa7	-0.891652	0.00044542	0.00794191	3.94571	3.568	5.48688	3.31676	2.57476	2.50146	2.63401	3.21317
ENSMUSG00000025362	Rps26	-0.892749	5.28891e-05	0.00160408	493.689	534.975	719.501	684.61	378.252	405.838	468.131	417.154
ENSMUSG00000046215	Rprml	-0.892888	1.12103e-05	0.000468233	7.9344	3.62519	5.57422	8.13061	4.19448	4.29241	3.90031	3.53969
ENSMUSG00000018830	Myh11	-0.901387	1.55259e-06	9.76113e-05	53.2477	43.4884	66.2937	50.6512	33.0871	36.1476	37.6191	36.1346
ENSMUSG00000023170	Gps2	-0.902919	0.000378783	0.00706146	12.4518	12.7424	13.1046	13.3107	7.92714	10.5924	8.97735	8.00784
ENSMUSG00000034382	AI661453	-0.906716	0.000679653	0.0106616	1.29311	0.689751	0.834949	1.358	0.788997	0.417631	0.599673	0.839667
ENSMUSG00000060802	B2m	-0.907929	0.000655817	0.0104094	401.653	567.134	849.827	764.57	493.454	519.311	392.404	353.22
ENSMUSG00000029402	Snrnp35	-0.912388	0.00178609	0.0218458	3.06607	2.64817	3.19446	2.93345	1.73753	2.52375	1.97664	1.48956
ENSMUSG00000052415	Tchh	-0.916388	0.0303436	0.148108	4.03692	5.67221	5.72136	4.8147	3.38757	3.07114	5.1114	2.83591
ENSMUSG00000020160	Meis1	-0.917825	2.93999e-07	2.52588e-05	3.183	2.48443	4.71059	4.55281	2.12964	2.38564	2.43393	2.54699
ENSMUSG00000028441	1110017D15Rik	-0.920315	0.00579658	0.0498624	1.91831	1.09559	1.56304	2.07325	0.653622	1.09454	1.17873	1.17163
ENSMUSG00000043219	Hoxa6	-0.921058	4.9596e-05	0.00152334	6.04477	3.14197	8.63308	5.79896	4.46848	3.10021	3.61691	3.37628
ENSMUSG00000036814	Slc6a20a	-0.922226	0.0436509	0.186319	0.28964	0.176302	0.223578	0.263608	0.152991	0.0695836	0.162361	0.204023
ENSMUSG00000000942	Hoxa4	-0.922278	9.42091e-05	0.00249659	3.53783	2.48844	3.42274	4.70903	2.6162	2.03984	2.53236	1.74443
ENSMUSG00000053693	Mast1	-0.924277	0.00299065	0.0314872	0.426444	0.187882	0.571831	0.553065	0.271733	0.278077	0.209627	0.30284
ENSMUSG00000044927	H1fx	-0.925905	4.48112e-07	3.59413e-05	11.3162	3.76073	10.5399	12.7573	5.65669	5.00951	6.95335	5.26907
ENSMUSG00000043336	Filip1l	-0.927209	0.00052119	0.00893922	2.12004	2.74142	4.18489	3.78996	2.31947	2.06932	1.69321	2.40909
ENSMUSG00000054074	Skida1	-0.928368	0.0073636	0.0585721	0.515475	0.104589	0.596856	0.718378	0.257153	0.294116	0.300069	0.285293
ENSMUSG00000062785	Kcnc3	-0.929925	1.00999e-06	7.00667e-05	18.1646	6.51436	9.64967	9.47573	6.12932	7.18315	7.01737	6.64077
ENSMUSG00000025035	Arl3	-0.930877	0.000790191	0.0119902	18.0538	22.4572	22.1007	28.1754	14.2535	18.9539	16.152	12.2884
ENSMUSG00000051817	Sox12	-0.933444	9.98735e-08	1.01309e-05	16.5566	5.05337	9.13691	9.95542	6.18387	6.37389	5.26417	6.65218
ENSMUSG00000006586	Runx1t1	-0.938198	4.21044e-06	0.000220852	1.39386	0.889309	1.55348	1.07453	0.739113	0.78974	0.790594	0.745451
ENSMUSG00000074922	Fam122a	-0.942037	2.90072e-12	1.22858e-09	27.9795	13.2933	32.6522	32.0403	18.1163	16.1624	14.5616	15.2654
ENSMUSG00000029814	Igf2bp3	-0.948572	0.0269581	0.138486	0.191267	0.228226	0.587756	0.457727	0.289456	0.265034	0.134316	0.222027
ENSMUSG00000053291	Rab4b	-0.948789	0.0108269	0.0760718	1.77391	1.94592	1.48063	2.43155	1.68863	1.23432	0.74439	1.36492
ENSMUSG00000035277	Arx	-0.952422	0.00159119	0.0201459	0.76236	0.370678	0.92672	0.846203	0.390594	0.423226	0.506423	0.41364
ENSMUSG00000027525	Phactr3	-0.958255	0.0274731	0.139876	0.610962	0.172722	0.274792	0.330154	0.149884	0.0836636	0.250275	0.327075
ENSMUSG00000021852	Slc35f4	-0.958848	0.000843915	0.0126624	1.59851	0.582927	2.15436	2.8249	1.32485	1.15858	0.831795	0.867319
ENSMUSG00000032327	Stra6	-0.959524	3.41767e-06	0.000190114	4.90013	1.43784	3.67825	3.58621	2.04369	1.29888	2.21277	2.37908
ENSMUSG00000038086	Hspb2	-0.960154	0.0426217	0.183598	1.76624	0.493403	0.901023	1.41092	0.770695	0.876322	0.566237	0.513884
ENSMUSG00000078161	Erich3	-0.964412	0.045804	0.191879	0.114707	0.0921258	0.0841172	0.13172	0.0399723	0.0572678	0.0646097	0.0959498
ENSMUSG00000026414	Tnnt2	-0.965107	2.33502e-05	0.000854121	5.79349	5.10825	6.78015	5.08621	3.3594	3.29544	4.17693	3.85133
ENSMUSG00000019761	Krt10	-0.970183	0.0359846	0.16469	0.368526	1.31141	1.44132	1.43998	0.632227	0.711687	0.975457	0.731701
ENSMUSG00000025066	Sfr1	-0.975717	0.000467816	0.00826189	14.0622	22.2624	28.8188	33.1923	15.2627	15.833	17.0509	15.9524
ENSMUSG00000087444	Gm5475	-0.987753	0.00525724	0.0466962	0.591789	0.555722	0.778923	0.836384	0.304574	0.54545	0.410252	0.413421
ENSMUSG00000060180	Myh13	-0.988907	0.00429887	0.0408146	0.665878	0.931166	0.593622	1.00541	0.491378	0.569898	0.545542	0.514865
ENSMUSG00000062372	Otof	-0.991359	8.91036e-10	1.95558e-07	9.94551	3.30043	7.10353	7.95567	4.7734	3.81658	3.05475	4.6735
ENSMUSG00000026500	Cox20	-0.991855	0.00252484	0.0279352	7.61948	13.4344	26.6815	27.2901	10.3737	12.4358	12.5576	10.8413
ENSMUSG00000075394	Hoxc4	-0.99379	3.03897e-09	5.60053e-07	5.51349	2.04996	4.65203	5.23287	2.93364	2.13982	2.54518	2.48822
ENSMUSG00000026032	Ndufb3	-0.99395	9.98006e-05	0.00259912	17.0381	18.6951	20.3105	21.8617	11.8854	15.1815	11.5369	11.4536
ENSMUSG00000015476	Prrt1	-0.996335	7.21852e-09	1.1541e-06	29.2215	15.4133	25.4602	18.6845	11.601	14.4907	13.838	13.6018
ENSMUSG00000061144	Spink12	-0.997974	1.31264e-05	0.000532601	166.234	154.984	317.179	400.287	140.408	165.818	170.821	143.306
ENSMUSG00000025938	Slco5a1	-0.998916	0.000254079	0.00529247	0.516244	0.188257	0.402446	0.693655	0.233379	0.262711	0.222906	0.313448
ENSMUSG00000038135	Crygn	-0.999289	0.0262627	0.13606	1.85503	1.39052	1.58706	0.918895	0.603332	1.05843	1.0132	0.812789
ENSMUSG00000048096	Lmod1	-1.00051	5.34695e-05	0.00161734	3.29282	3.63239	4.76323	3.90003	2.21318	2.60801	2.37747	2.70226
ENSMUSG00000026950	Neb	-1.00512	0.0121985	0.0818504	0.0633494	0.0746215	0.152271	0.0627606	0.0618114	0.0662667	0.0432509	0.0454202
ENSMUSG00000015092	Edf1	-1.00643	0.0102771	0.0736704	31.8332	46.8578	46.8792	48.7159	23.4953	34.3165	30.5162	27.0018
ENSMUSG00000034898	Filip1	-1.00867	5.22391e-08	5.75871e-06	2.34118	1.47957	2.5518	2.00486	1.18408	1.21172	1.39402	1.17409
ENSMUSG00000052549	Arl13a	-1.01566	0.0323183	0.153699	0.409386	0.438392	0.63378	0.73742	0.266298	0.272516	0.251552	0.521816
ENSMUSG00000078453	Abracl	-1.01839	0.0138067	0.0889096	29.891	55.1814	78.2111	78.4124	39.2001	38.4339	43.1723	33.0021
ENSMUSG00000030587	2200002D01Rik	-1.02303	0.036146	0.165053	0.728853	0.104066	0.831418	1.26911	0.496682	0.369657	0.431266	0.309672
ENSMUSG00000029725	Ppp1r35	-1.02405	9.61536e-07	6.76776e-05	7.88583	5.74495	11.8996	9.99914	5.47002	4.46402	4.73108	6.114
ENSMUSG00000011267	Zfp296	-1.02907	0.0443049	0.188146	0.581971	0.39885	0.682834	0.419317	0.346113	0.487017	0.254293	0.148359
ENSMUSG00000059395	Nkapl	-1.03745	0.0448683	0.189538	0.973797	1.04279	0.396725	0.701633	0.361964	0.694528	0.498634	0.426673
ENSMUSG00000028069	Gpatch4	-1.03782	0.00482125	0.04425	1.66533	2.31257	1.75961	1.68372	0.838659	1.22606	1.47441	1.2582
ENSMUSG00000009687	Fxyd5	-1.03828	0.00225584	0.0257374	1.14841	1.67928	1.60687	1.75476	0.77278	1.24272	0.811099	1.07892
ENSMUSG00000028459	Cd72	-1.03853	0.0157258	0.0972605	0.367703	0.472506	1.12352	1.61445	0.717551	0.393378	0.54602	0.395453
ENSMUSG00000064357	mt-Atp6	-1.03868	0.00682619	0.0557881	2.96369	6.27267	10.1422	5.46406	3.88805	4.37672	3.71357	3.58317
ENSMUSG00000041954	Tnfrsf18	-1.04202	0.0439452	0.187048	0.998503	0.320774	1.80615	0.539576	0.501049	0.626692	0.245417	0.668179
ENSMUSG00000069378	Prdm6	-1.04336	0.0057502	0.049579	0.912895	0.439909	0.64713	0.912632	0.381742	0.364612	0.673128	0.218176
ENSMUSG00000051159	Cited1	-1.04443	1.30704e-13	8.30381e-11	28.2101	11.407	28.1152	34.8441	14.757	14.3558	14.3223	13.5882
ENSMUSG00000046167	Gldn	-1.04697	2.22533e-06	0.00013242	4.30743	2.03064	4.26148	2.89237	2.27374	1.14887	2.43272	1.8396
ENSMUSG00000057789	Bak1	-1.05943	4.12877e-07	3.39931e-05	4.30224	3.51521	7.39188	6.18173	3.63277	2.75272	2.95428	2.97169
ENSMUSG00000025374	Nabp2	-1.06865	2.76811e-06	0.000158736	16.7995	18.4163	25.0198	23.5845	13.374	12.9451	12.6639	11.5896
ENSMUSG00000051579	Tceal8	-1.0713	0.0108884	0.0764001	11.4543	19.8949	18.0916	21.1403	11.4254	10.543	13.1174	10.2762
ENSMUSG00000026018	Ica1l	-1.07219	0.00334838	0.0340507	0.487899	0.146291	0.49295	0.580037	0.272031	0.259823	0.186539	0.217662
ENSMUSG00000036139	Hoxc9	-1.07507	2.14818e-05	0.000796641	1.90035	1.15673	2.00478	1.59443	0.920137	1.02722	0.69652	1.12348
ENSMUSG00000054428	Atpif1	-1.09057	0.00849991	0.0647788	34.3053	58.8275	63.1924	65.421	31.7262	40.0826	36.0674	30.5563
ENSMUSG00000002771	Grin2d	-1.09295	2.08383e-05	0.000773967	1.06021	0.337088	0.7374	0.626081	0.377834	0.436547	0.349237	0.334362
ENSMUSG00000045573	Penk	-1.09411	1.64256e-05	0.000637534	49.5699	67.2255	92.569	75.0917	44.2665	42.4483	43.599	42.1004
ENSMUSG00000031765	Mt1	-1.11792	3.08667e-10	7.7456e-08	113.962	92.4501	172.571	175.851	80.4091	85.096	73.5105	70.2413
ENSMUSG00000074210	E130208F15Rik	-1.12372	9.13906e-05	0.00243817	2.02095	1.3645	2.21044	2.85054	1.68064	1.21173	0.869958	0.884121
ENSMUSG00000102692	Dchs2	-1.12637	0.0159037	0.0979078	0.170657	0.0353706	0.166861	0.0654467	0.0613875	0.0502566	0.0721632	0.0421014
ENSMUSG00000023904	Hcfc1r1	-1.13094	4.71764e-10	1.1166e-07	105.231	87.4883	122.708	133.94	60.2464	67.5965	67.2952	59.1469
ENSMUSG00000026536	Ifi211	-1.13776	0.0490688	0.200443	0.266044	0.811945	0.357675	1.40172	0.296668	0.417443	0.544913	0.413287
ENSMUSG00000064368	mt-Nd6	-1.14017	0.0452491	0.190546	163.9	626.261	488.706	625.857	380.074	283.619	286.46	275.209
ENSMUSG00000035184	Fam124a	-1.14287	0.0170583	0.102853	0.250257	0.21439	0.261005	0.252439	0.167439	0.15231	0.136688	0.0797463
ENSMUSG00000030376	Slc8a2	-1.15026	0.00509429	0.045652	0.440046	0.217488	0.28684	0.219502	0.239059	0.0772549	0.147906	0.161797
ENSMUSG00000035745	Grin3b	-1.15185	0.0389594	0.173214	0.361627	0.0929395	0.141434	0.293126	0.141139	0.144434	0.0592549	0.120997
ENSMUSG00000048794	Cfap100	-1.15214	0.0280501	0.141404	0.218239	0.305936	0.465569	0.343078	0.0884948	0.135842	0.32509	0.170698
ENSMUSG00000074403	Hist2h3b	-1.15454	0.00107472	0.0150351	3.77089	5.47091	10.1096	8.93971	2.84852	4.30313	4.5843	3.72115
ENSMUSG00000068184	Ndufaf2	-1.15671	0.00312271	0.0324251	0.814856	1.61826	1.35203	1.89478	0.963725	0.619914	0.768749	0.991428
ENSMUSG00000038418	Egr1	-1.15751	1.57345e-08	2.26426e-06	6.20881	4.13383	5.79891	5.29384	2.36197	2.50776	3.10196	3.78401
ENSMUSG00000038515	Grtp1	-1.15868	7.9491e-07	5.83305e-05	3.19167	3.16463	6.10653	6.21753	2.57043	2.63045	2.29205	2.61795
ENSMUSG00000049721	Gal3st1	-1.16174	0.0441937	0.187872	0.34751	0.121788	0.370671	0.375578	0.105685	0.180255	0.155296	0.181205
ENSMUSG00000074826	Gm10767	-1.18182	0.0147382	0.0929979	0.459495	0.184519	0.505436	0.46557	0.288218	0.131088	0.211757	0.192178
ENSMUSG00000042289	Hsd3b7	-1.18702	0.00838799	0.0642373	0.597246	0.767473	0.558574	0.505162	0.289563	0.296324	0.404215	0.372359
ENSMUSG00000057265	Bbof1	-1.19916	0.000233372	0.00497269	1.62856	2.86007	4.06047	4.01889	1.66469	1.79648	1.57886	1.89418
ENSMUSG00000020994	Pnn	-1.19931	0.00450071	0.0421148	13.797	22.2165	19.4358	19.2006	10.0288	12.5955	11.0106	10.7796
ENSMUSG00000019831	Wasf1	-1.20888	0.00218918	0.0251912	0.502134	0.25249	0.576353	0.84943	0.24345	0.373702	0.250411	0.229578
ENSMUSG00000021643	Serf1	-1.2123	1.16938e-05	0.00048507	13.7291	17.6422	29.3585	34.6931	12.6661	13.9762	13.1901	10.7641
ENSMUSG00000069518	Gm10271	-1.21817	0.0170251	0.102729	6.08831	3.9118	7.06908	5.3463	1.69729	1.30269	3.42928	4.72896
ENSMUSG00000097025	Gm26558	-1.21869	0.022407	0.122692	1.8615	0.354379	0.741521	0.968667	0.384403	0.629405	0.564849	0.329544
ENSMUSG00000047844	Bex4	-1.22056	0.00603726	0.0513391	40.496	65.0705	46.8072	71.6672	30.2895	40.223	33.1196	26.9839
ENSMUSG00000042759	Apobr	-1.23904	0.00087803	0.0130045	20.2005	22.6874	18.0659	19.1857	11.7658	10.3126	12.3662	11.2879
ENSMUSG00000090812	Samd15	-1.23995	0.00806149	0.0624785	0.409185	0.563369	0.485817	0.631763	0.260735	0.266823	0.287347	0.279407
ENSMUSG00000042750	Bex2	-1.24048	0.00597082	0.0509291	23.2711	43.5886	36.0586	43.4098	24.0439	23.18	19.7658	17.8475
ENSMUSG00000058546	Rpl23a	-1.24166	0.0175565	0.105069	18.7775	36.0644	27.6385	26.8406	10.0192	18.4326	20.9256	15.2485
ENSMUSG00000024033	Rsph1	-1.24325	3.41715e-05	0.0011442	7.08865	9.96098	8.92553	10.3068	4.7769	5.2376	5.43157	4.72896
ENSMUSG00000046561	Arsj	-1.24765	0.0117454	0.0798084	0.230737	0.0790673	0.255687	0.315873	0.0857659	0.122876	0.126026	0.0882314
ENSMUSG00000029607	Ankrd61	-1.24766	0.00504835	0.0453919	0.501925	0.343992	1.27598	1.48274	0.522389	0.267293	0.466048	0.479826
ENSMUSG00000031493	Ggn	-1.25272	5.97571e-06	0.00029148	2.03613	0.661305	1.33452	1.83785	0.798421	0.714931	0.458288	0.876987
ENSMUSG00000034159	2310007B03Rik	-1.25797	8.1604e-05	0.00223619	0.955354	0.431336	1.18657	1.17205	0.345511	0.500902	0.486546	0.468987
ENSMUSG00000041333	Mup4	-1.26089	0.0316645	0.151624	0.515063	0.330933	2.07739	0.765413	0.430764	0.367352	0.580226	0.369289
ENSMUSG00000045903	Npas4	-1.26345	0.0223409	0.12241	0.181144	0.116387	0.247962	0.254508	0.0605988	0.082685	0.118727	0.121218
ENSMUSG00000092592	Gm20449	-1.28202	0.0311433	0.150463	0.0925828	0.118971	0.22631	0.250152	0.0516201	0.0880422	0.0632096	0.13276
ENSMUSG00000069806	Cacng7	-1.28671	0.00015267	0.0036135	1.50281	0.51727	0.892129	0.899106	0.389025	0.459356	0.373765	0.59005
ENSMUSG00000096351	Samd11	-1.28772	0.00299813	0.0315385	0.454874	0.438392	0.667137	0.442452	0.15217	0.311447	0.204969	0.326135
ENSMUSG00000075302	Erich2	-1.28804	0.00547031	0.0479536	0.636579	0.654414	1.33821	0.584796	0.603378	0.290572	0.208615	0.517269
ENSMUSG00000064125	Prr36	-1.28921	0.0481544	0.197981	0.205757	0.148726	0.176034	0.0416956	0.0430204	0.102725	0.105358	0.0368809
ENSMUSG00000001403	Ube2c	-1.29199	0.0172181	0.103557	0.379304	0.174076	0.291397	0.439221	0.0906355	0.123669	0.177575	0.207202
ENSMUSG00000078588	Ccdc24	-1.29887	0.049493	0.201324	0.104142	0.0764713	0.232745	0.0803954	0.06636	0.0509321	0.0487554	0.0711121
ENSMUSG00000031245	Hmgn5	-1.30431	0.0435087	0.18601	2.27131	9.03214	5.97215	5.47346	2.73812	3.8178	3.97316	3.1396
ENSMUSG00000027377	Mall	-1.32789	7.06725e-05	0.00200727	1.30204	0.874598	1.18628	1.0554	0.560967	0.337685	0.678832	0.5092
ENSMUSG00000071415	Rpl23	-1.35345	0.00198823	0.0235294	92.3767	203.414	209.035	246.202	92.1967	104.456	103.972	93.6146
ENSMUSG00000079120	AY761185	-1.36832	2.4579e-07	2.2059e-05	149.86	172.992	157.41	184.877	93.2332	96.6197	83.3717	66.6276
ENSMUSG00000056629	Fkbp2	-1.37294	0.00162546	0.0204312	55.8474	93.865	71.9635	91.5366	38.2524	46.5315	41.8915	38.9807
ENSMUSG00000030887	Pdzd9	-1.37606	0.00409067	0.0394519	0.272298	0.314918	0.825352	0.765158	0.21255	0.217513	0.290016	0.260309
ENSMUSG00000004263	Atn1	-1.38547	1.16202e-06	7.66488e-05	2.03539	1.20451	1.08671	1.3025	0.671946	0.519546	0.625335	0.832074
ENSMUSG00000067367	Lyar	-1.4444	0.015326	0.0954347	5.393	14.2507	6.86984	8.86603	4.95503	5.20074	4.69844	4.53834
ENSMUSG00000039452	Snx22	-1.44907	1.44079e-11	5.19159e-09	8.80028	6.74913	15.9766	13.7999	5.44026	5.86029	4.70462	3.72663
ENSMUSG00000079941	Gm11273	-1.44979	0.000399461	0.00736167	7.15377	10.7575	6.99467	7.07356	3.90376	4.16859	2.99283	4.80171
ENSMUSG00000034226	Rhov	-1.46274	0.0493758	0.201105	0.383424	0.223958	0.136326	0.18836	0.0777383	0.0795533	0.142788	0.0999662
ENSMUSG00000028464	Tpm2	-1.47208	2.31594e-08	3.05526e-06	18.2859	23.2172	29.6476	22.2111	9.83021	12.2087	10.2633	11.5321
ENSMUSG00000071347	C1qtnf9	-1.47851	6.21632e-11	1.83018e-08	29.7585	25.2931	35.8066	23.2619	13.6701	14.2385	12.8803	11.093
ENSMUSG00000078611	Gm5901	-1.48068	0.0372618	0.168082	0.572782	0.334562	0.254565	0.731599	0.11613	0.475366	0.0853219	0.149335
ENSMUSG00000026715	Serpinc1	-1.5242	0.00015451	0.00364276	0.262765	0.260918	0.362026	0.335623	0.119869	0.163557	0.107639	0.125598
ENSMUSG00000019464	Ptger1	-1.52972	9.26195e-11	2.60002e-08	1.20138	0.975034	1.43433	1.50343	0.507667	0.51952	0.549121	0.556111
ENSMUSG00000072571	Tmem253	-1.53299	0.0198667	0.113305	0.336732	0.370892	0.705521	0.987809	0	0.274472	0.275879	0.413879
ENSMUSG00000058966	Fam57b	-1.53846	2.70325e-05	0.00095692	0.917954	1.01576	1.84494	1.04721	0.483376	0.52376	0.355141	0.68253
ENSMUSG00000061474	Mrps36	-1.55076	0.000383998	0.00713662	2.70978	5.22318	2.81511	4.94208	1.79413	1.73939	2.08132	1.61904
ENSMUSG00000078630	Tomt	-1.5527	0.00619519	0.0522127	0.254768	0.190973	0.228344	0.504801	0.118373	0.0969094	0.191333	0.0608878
ENSMUSG00000097078	Gm26566	-1.56256	0.00242613	0.0270914	0.629067	0.440926	1.23015	1.73059	0.318854	0.326299	0.374825	0.5467
ENSMUSG00000032860	P2ry2	-1.59539	1.54858e-06	9.76113e-05	2.1489	0.582678	1.21441	1.55542	0.395714	0.247471	0.646077	0.753869
ENSMUSG00000047619	Ddi1	-1.59616	0.00754023	0.0594696	0.0417213	0.12867	0.261078	0.261528	0.0465238	0.104742	0.0341815	0.0957225
ENSMUSG00000110170	St6galnac2	-1.59807	2.91809e-08	3.61274e-06	9.69951	5.43887	4.17287	6.67096	3.30381	2.33446	2.02278	3.00091
ENSMUSG00000036578	Fxyd7	-1.60213	0.0266137	0.137288	1.11355	0.330217	0.502518	0.740613	0.191036	0.195497	0.140356	0.49132
ENSMUSG00000079480	Pin4	-1.62999	7.51842e-05	0.00209838	3.47206	7.34016	10.1845	5.81032	2.99747	2.93965	3.21164	2.14141
ENSMUSG00000032221	Mns1	-1.64086	0.000610428	0.00992387	0.373126	1.0316	0.619103	0.769867	0.327819	0.154834	0.352014	0.432362
ENSMUSG00000020234	4930404N11Rik	-1.67333	1.14521e-05	0.000477507	1.11163	1.0285	2.30424	2.2106	0.54542	0.405931	0.765021	0.722627
ENSMUSG00000064354	mt-Co2	-1.68072	0.0286066	0.143045	2.25641	17.3972	16.6316	8.34773	6.00005	5.54594	5.33262	3.73339
ENSMUSG00000093536	Smim17	-1.69824	0.0274826	0.139887	0.111406	0.0954396	0.145238	0.140472	0.0207051	0.0211885	0.0456367	0.0887511
ENSMUSG00000043165	Lor	-1.70078	0.0149884	0.0940117	0.300309	0.21439	0.326256	0.216376	0.0744172	0.0380774	0.136688	0.127594
ENSMUSG00000079523	Tmsb10	-1.70714	0.00325738	0.0334779	13.0766	31.507	18.1693	18.5958	9.88115	10.6027	9.44476	6.7439
ENSMUSG00000000889	Dbh	-1.71104	0.00440775	0.0414699	0.581515	0.388574	0.13646	0.301672	0.181567	0.159263	0.095285	0.111182
ENSMUSG00000001948	Spa17	-1.73129	0.0168143	0.10189	3.49661	12.0167	4.69098	4.74575	2.3576	3.71176	2.39836	3.34266
ENSMUSG00000075410	Prcd	-1.73445	0.0322156	0.153372	0.387032	0	0.662243	0.575152	0.215792	0.0552076	0.0792722	0.184996
ENSMUSG00000039330	Tsga10ip	-1.74214	0.0307069	0.149104	0.97513	0.469898	0.595902	1.05389	0	0.417287	0.29959	0.349574
ENSMUSG00000048191	Muc6	-1.74793	0.00437369	0.0412539	0.0677869	0.0871076	0.0994191	0.102567	0.022677	0.00773549	0.033322	0.0648024
ENSMUSG00000096549	Prickle4	-1.74859	0.0452351	0.190533	0.213914	0.343604	0.57518	0.115596	0.0596343	0.0610267	0.175256	0.153372
ENSMUSG00000035295	Wdr38	-1.76273	5.15434e-08	5.71018e-06	1.23165	0.791346	2.86011	2.89996	0.539559	0.602353	0.77482	0.693837
ENSMUSG00000040441	Slc26a10	-1.79087	1.64772e-06	0.000102789	0.511164	0.339023	1.19306	1.15836	0.239034	0.263432	0.216149	0.34679
ENSMUSG00000047459	Dynlrb1	-1.7969	3.8111e-05	0.00124543	47.082	84.7019	82.7156	82.7998	33.0971	28.1102	32.34	22.4685
ENSMUSG00000073805	Fam196a	-1.80005	0.0068532	0.0558953	0.0712617	0.183146	0.330965	0.211798	0.0595986	0.0609901	0.0583835	0.102186
ENSMUSG00000042451	Mybph	-1.8441	0.044834	0.189473	0.102347	0.0328794	0.225159	0.387146	0.14266	0	0.0209627	0.0733803
ENSMUSG00000054362	Lexm	-1.848	0.0249727	0.131779	0.264836	0.0972341	0.369923	0.327116	0	0.172695	0.123986	0.0361679
ENSMUSG00000041453	Rpl21	-1.87283	0.00416692	0.0398408	39.4354	159.218	103.51	112.756	39.1958	41.2789	46.0655	41.0624
ENSMUSG00000081650	Gm16181	-1.9342	0.0296791	0.146257	0.104693	0.538131	1.02365	0.905193	0.233489	0.11947	0.25732	0.200167
ENSMUSG00000097221	1810049J17Rik	-1.93479	1.39061e-05	0.000557677	2.9552	2.14641	8.16593	5.41573	0.859664	1.02636	1.36847	2.33377
ENSMUSG00000062591	Tubb4a	-1.95022	0.000311433	0.00610773	0.346361	0.376607	0.703368	0.374337	0.148551	0.212827	0.0873132	0.127351
ENSMUSG00000028979	Masp2	-2.00179	3.96535e-06	0.000211999	0.427058	0.299333	0.645321	0.755265	0.129877	0.199365	0.0954221	0.204128
ENSMUSG00000097411	B430218F22Rik	-2.0104	0.0283758	0.142392	0.0397064	0.0510235	0.659997	0.557874	0.088554	0.135932	0.0650615	0.0759163
ENSMUSG00000028553	Angptl3	-2.0424	0.0286382	0.143053	0.12372	0.0635933	0.19355	0.133713	0	0.0564733	0.0608172	0.0236546
ENSMUSG00000064341	mt-Nd1	-2.04901	0.00691822	0.0562355	453.551	2846.44	1473.4	1729.85	611.933	720.291	579.892	517.309
ENSMUSG00000068240	Gm11808	-2.05355	0.00275333	0.0297011	17.5492	70.2262	33.0511	37.2968	14.9725	17.7413	14.4742	11.7098
ENSMUSG00000070354	Evi2	-2.22588	0.0239116	0.128074	0.0301019	0.0193408	0.191311	0.178933	0	0.0171754	0.049324	0.0287766
ENSMUSG00000039055	Eme1	-2.23406	0.000115624	0.002926	0.218596	0.249689	0.617456	0.787507	0.162506	0.1663	0.0795965	0.0696573
ENSMUSG00000054083	Capn12	-2.28693	0.00644542	0.0535985	0.11716	0.0501843	0.267294	0.358765	0.0217744	0.111414	0	0.0560008
ENSMUSG00000024354	Slc23a1	-2.29299	0.0433808	0.185691	0.098085	0.0252082	0.0767229	0.14841	0	0.0671576	0.0160719	0
ENSMUSG00000092609	Gm20481	-2.31173	4.98614e-06	0.000253929	1.78925	1.62298	3.08728	3.07128	0.234731	0.960846	0.689837	0.402464
ENSMUSG00000046523	Kctd4	-2.40595	0.0450084	0.189931	0.0148477	0.0190796	0.101622	0.144422	0.0331136	0	0	0.0283879
ENSMUSG00000079579	Gm6760	-2.40993	0.0314035	0.151043	0.0982799	0.505166	0.384377	0.95596	0	0	0.241557	0.187906
ENSMUSG00000028461	Ccdc107	-2.4255	4.58954e-09	7.74829e-07	82.1728	107.132	307.949	285.227	43.3564	46.5261	40.8377	41.3256
ENSMUSG00000021485	Mxd3	-2.43414	0.000713406	0.0110293	0.102229	0.437888	1.03287	0.883888	0.0759978	0.0388861	0.195427	0.228032
ENSMUSG00000067786	Nnat	-2.45682	0.00344495	0.0348293	0.163981	0.316078	0.440918	0.84182	0.137143	0.233908	0	0.0391902
ENSMUSG00000048292	Olfr1417	-2.47527	0.0231596	0.125447	0.0331441	0.0425908	0.0810174	0.161195	0.0184797	0.0189111	0	0.0316848
ENSMUSG00000071036	Gm10309	-2.48235	0.0016017	0.0202473	0.236852	0.190225	0.492117	0.191987	0.0660291	0.101356	0.0727683	0
ENSMUSG00000090551	A730015C16Rik	-2.50551	0.0237024	0.127486	0.0486167	0.0624735	0.808104	0.315261	0.054213	0.110958	0.0796617	0
ENSMUSG00000021194	Chga	-2.50987	0.00543684	0.0477721	0.220673	0.283569	0.154118	0.170355	0	0.0719487	0.0516553	0.0602735
ENSMUSG00000048852	Gm12185	-2.5236	0.00954109	0.0698003	0.0225536	0.246345	0.044104	0.0731256	0.0125749	0.0386054	0.0461944	0.0107803
ENSMUSG00000072612	Gm10382	-2.60511	1.60876e-07	1.53512e-05	0.818441	2.16529	2.96559	2.34144	0.268427	0.549389	0.473319	0.460239
ENSMUSG00000091306	Gm17606	-2.62691	0.000414546	0.00755441	1.2684	7.17164	6.20095	3.83837	0.282881	1.73691	1.66268	0.485021
ENSMUSG00000005677	Nr1i3	-2.63644	0.0318019	0.152092	0.0597594	0.0255974	0.116861	0.107644	0	0	0.0326399	0.0190428
ENSMUSG00000007944	Ttc9b	-2.68384	0.0272443	0.139318	0.0578568	0.111521	0.141425	0.12506	0.0322583	0	0.0474011	0
ENSMUSG00000045776	Lrtm1	-2.68642	0.00930077	0.0687963	0.024325	0.0312581	0.063424	0.0525793	0.00904168	0	0.00664301	0.0155027
ENSMUSG00000046110	Serinc4	-2.68719	5.62306e-10	1.29287e-07	0.7679	0.627943	1.88843	1.685	0.31138	0.265542	0.0762579	0.266942
ENSMUSG00000038770	Kpna7	-2.70768	0.031319	0.150845	0.0725981	0	0.118306	0.235385	0.026985	0	0.0198261	0.0231339
ENSMUSG00000071862	Lrrtm2	-2.72708	0.0151266	0.0945831	0	0.0403955	0.122946	0.135899	0.0350543	0.0119576	0.0085849	0
ENSMUSG00000053615	Gm9913	-2.78426	0.021224	0.118253	0.0212535	0.0273112	0.332493	0.160791	0	0.0727601	0.0174126	0
ENSMUSG00000026616	Cr2	-2.81766	0.00594314	0.0507808	0.00955586	0.135074	0.0654034	0.144588	0	0	0.0391448	0.0274054
ENSMUSG00000046959	Slc26a1	-2.83646	0.00673024	0.055172	0.0622886	0.0200105	0.197936	0.218789	0.0173647	0	0	0.0595461
ENSMUSG00000018698	Lhx1	-2.85768	2.84092e-05	0.00099112	0.339559	0.0991681	0.377281	0.183492	0.103267	0.035226	0.0126452	0.0147549
ENSMUSG00000044067	Gpr22	-2.88731	0.0486842	0.19948	0.0258823	0	0.0632667	0.0839183	0.0144308	0	0.0106025	0
ENSMUSG00000031409	Tceal6	-2.98203	0.00346176	0.0349535	0.266432	0.136948	0.416811	0.633493	0	0.121615	0.0873132	0
ENSMUSG00000054116	E130116L18Rik	-2.99026	0.028401	0.142424	0.581971	0.249281	0.569028	1.25795	0	0.221371	0.158933	0
ENSMUSG00000079001	4930404H24Rik	-3.00355	0.000207265	0.004529	1.43471	1.84363	2.63025	2.13206	0.799929	0	0.440787	0
ENSMUSG00000053603	4930442H23Rik	-3.05263	0.0303964	0.148279	0.0476795	0.122538	0.372953	0.103061	0	0.0544094	0.039063	0
ENSMUSG00000091955	Gm9844	-3.07493	0.000312974	0.00612302	1.10154	2.04462	0.837704	1.19052	0.409448	0	0.300826	0.117005
ENSMUSG00000029530	Ccr9	-3.07959	0.00716205	0.0576354	0	0.0587109	0.156354	0.111103	0.025474	0.0130344	0	0.0109193
ENSMUSG00000079462	Gm15737	-3.08274	1.84826e-05	0.000700704	0.0606467	0.202624	0.28463	0.367053	0.0135256	0.0692069	0.0198747	0.0347859
ENSMUSG00000025094	Slc18a2	-3.1099	0.0383546	0.171442	0	0.0200579	0.0763093	0.134958	0.0174058	0	0.0127882	0
ENSMUSG00000087610	Gm16253	-3.11301	0.00136691	0.018092	0.647575	0.693456	0.633173	1.04982	0.120353	0.123163	0.176849	0
ENSMUSG00000079546	Gm11146	-3.13128	0.0225025	0.122992	0	7.15126	4.83674	0.668287	0	0	1.5198	0.591119
ENSMUSG00000040514	Tex47	-3.25135	0.000113295	0.00288216	0.123626	0.0529539	0.684967	0.378565	0.0689283	0.0235126	0.0337615	0.0196971
ENSMUSG00000090625	Gm20721	-3.26719	9.85297e-12	3.71673e-09	10.9202	18.6074	46.2684	51.7049	3.83605	4.24514	4.09649	3.63276
ENSMUSG00000058537	AW822073	-3.2885	0.030932	0.149832	0.151508	0.0389383	0.0888834	0.0327491	0	0.0345787	0	0
ENSMUSG00000068859	Sp9	-3.28916	0.00143338	0.0187356	0.0131504	0.101391	0.205728	0.170551	0	0	0.0323218	0.0251429
ENSMUSG00000041216	Clvs1	-3.3108	0.00570364	0.0493715	0.0319747	0.164353	0.078159	0.0518359	0.0178277	0	0.0130982	0.0152835
ENSMUSG00000022766	Serpind1	-3.34615	0.0275826	0.14013	0	0.104446	0.105962	0.20497	0	0	0.0443939	0
ENSMUSG00000052301	Doc2a	-3.35312	0.0194295	0.111843	0.0233889	0.0300552	0.251556	0.12639	0	0.0533804	0	0
ENSMUSG00000074004	B3gnt6	-3.41911	0.0263118	0.13621	0.175254	0.0321721	0.0244795	0.0541169	0	0	0	0.023934
ENSMUSG00000030781	Slc5a2	-3.47594	0.000663204	0.010473	0.104279	0.268002	0.356861	0.169053	0.0872123	0	0.0213586	0
ENSMUSG00000043873	Chil5	-3.53763	0.0285155	0.142751	0.0916065	0.117716	0.313492	0	0	0	0.0375258	0
ENSMUSG00000050157	Gm867	-3.53832	0.00245154	0.027312	0.0972335	0.437314	0.522891	0.210174	0.108426	0	0.0398309	0
ENSMUSG00000041670	Rims1	-3.54085	0.00547013	0.0479536	0.0368359	0.0236674	0.0360167	0.0895749	0.010269	0.0105088	0	0
ENSMUSG00000078787	Cyp2t4	-3.68013	0.0108667	0.0762848	0.148495	0.0954098	0.0362982	0.200612	0	0.0423638	0	0
ENSMUSG00000055095	Spink6	-3.77047	0.010382	0.0741764	0.101126	0.129949	0.791017	0.437176	0.112767	0	0	0
ENSMUSG00000045994	B3gat1	-3.80103	0.000322236	0.00626315	0.0769324	0.0988597	0.225664	0.133034	0	0.0175582	0	0.0294181
ENSMUSG00000047485	Klhl34	-3.92996	1.08335e-09	2.27428e-07	0.490841	1.06437	2.09967	1.88985	0	0.0700152	0.0754007	0.293269
ENSMUSG00000020323	Prss57	-3.96806	5.30372e-06	0.00026634	0.104472	0.510145	0.449454	0.338731	0.0698988	0	0.0342369	0.0199745
ENSMUSG00000021135	Slc10a1	-3.97638	0.00530427	0.0469343	0.03394	0.174454	0.0995555	0.183406	0	0.0387305	0	0
ENSMUSG00000074569	Gcnt7	-3.98598	0.00511173	0.0457573	0.0267392	0.103081	0.0784336	0.202292	0	0.0305134	0	0
ENSMUSG00000039521	Foxp3	-4.03133	0.00240027	0.0268897	0.0619635	0.0398122	0.0757318	0.0837103	0	0.0176774	0	0
ENSMUSG00000113149	AC099934.3	-4.07377	0.011117	0.0773672	0.0517533	0.066504	0.151807	0.279667	0	0	0	0
ENSMUSG00000018595	Glra4	-4.07783	0.0207573	0.116713	0	0.0416604	0.126796	0.175193	0	0	0	0
ENSMUSG00000045009	Prrt3	-4.10335	0.00221889	0.0254724	0.0476031	0.0407806	0.124118	0.0685972	0	0	0	0.0151691
ENSMUSG00000050463	Krt78	-4.13729	0.000122453	0.00306667	0.328439	0.199919	0.0676073	0.130777	0.0385522	0	0	0.0165252
ENSMUSG00000067085	Gm10197	-4.22162	0.00213429	0.0247841	0	1.13851	2.59885	5.74527	0	0.337013	0	0.282326
ENSMUSG00000078719	Msmp	-4.23904	0.000403692	0.00740572	0.399469	0.307995	1.17175	0.690773	0	0.0911705	0.0654556	0
ENSMUSG00000069804	Gm10277	-4.2816	0.00353474	0.0354532	0	0.0997126	0.227611	0.167727	0	0.0295162	0	0
ENSMUSG00000095332	Gm9821	-4.29299	0.00189751	0.0228063	0.0303948	0.117174	0.148594	0.295648	0	0	0.0249019	0
ENSMUSG00000000157	Itgb2l	-4.34947	0.000345115	0.00657125	0	0.163108	0.330953	0.61732	0	0.048282	0	0.0202236
ENSMUSG00000078721	Fam205a1	-4.38752	0.00071451	0.0110363	0.042953	0.0551955	0.111994	0.0928445	0	0	0.0117302	0
ENSMUSG00000056947	Mab21l1	-4.42495	0.0038274	0.0376072	0	0.03061	0.372654	0.154468	0	0.0271829	0	0
ENSMUSG00000057777	Mab21l2	-4.43609	0.00908183	0.0675874	0	0.0282205	0.0858911	0.18988	0	0	0	0
ENSMUSG00000030303	Far2	-4.64509	2.68487e-07	2.37429e-05	0.0341155	0.372633	0.95067	0.682114	0.0380426	0.0194654	0.0419254	0
ENSMUSG00000072693	Gm10401	-4.68587	0.00127218	0.0171581	0.0977941	0.377002	0.573716	0.422771	0	0	0	0
ENSMUSG00000097704	Gm26741	-4.71246	0.0056608	0.049124	0	5.2607	1.33427	1.47484	0	0	0	0
ENSMUSG00000094487	Gm21958	-4.71602	0.00135166	0.0179252	0.0916065	0.353149	0.268708	0.693039	0	0	0	0
ENSMUSG00000035183	Slc24a5	-4.76149	0.00344221	0.0348289	0.0607585	0.156152	0	0.229831	0	0	0	0
ENSMUSG00000028451	1700022I11Rik	-4.84402	2.57031e-08	3.24882e-06	0.0955638	0.245603	0.965531	0.671335	0.0355214	0.0363508	0.013049	0
ENSMUSG00000020609	Apob	-4.84986	0.00271424	0.0293844	0	0.0218976	0.00833083	0.036834	0	0	0	0
ENSMUSG00000048636	A730049H05Rik	-4.99982	6.24076e-06	0.000298937	0.0795369	0.204413	1.16652	0.830956	0.0886924	0	0	0
ENSMUSG00000039462	Col10a1	-5.03617	0.000950105	0.0137515	0	0.0974826	0.11126	0.143479	0	0	0	0
ENSMUSG00000034493	4930556J24Rik	-5.50756	1.84885e-05	0.000700704	0.194626	0.125049	0.475745	0.631038	0	0	0	0
ENSMUSG00000059742	Kcnh7	-5.51362	1.51955e-05	0.000600229	0.0178248	0.0286315	0.0261426	0.0481612	0	0	0	0
ENSMUSG00000063656	Gm10135	-5.91612	1.52158e-05	0.000600229	0.471119	0.302699	5.5277	3.30961	0	0	0	0
ENSMUSG00000097854	Gm26602	-6.07524	5.81675e-06	0.000288946	0.208284	1.0706	5.09131	2.47618	0	0	0	0
ENSMUSG00000026156	B3gat2	-6.3115	2.04902e-06	0.000123668	0.0104971	0.0674449	0.307909	0.136139	0	0	0	0

## Sheet: Co
Gene ID	Gene name	log2FC	Pvalue	FDR	3M-Co1	3M-Co2	3M-Co3	3M-Co4	21M-Co1	21M-Co2	21M-Co3	21M-Co4
ENSMUSG00000057335	Cep170	-0.585127	0.000181422	0.00577151	3.59903	4.88499	5.40392	5.15286	3.33252	2.93329	2.20862	3.00493
ENSMUSG00000021423	Ly86	-0.588294	0.00181717	0.0313786	2.27566	2.25685	3.15613	2.30471	1.70845	1.4429	1.40044	1.34001
ENSMUSG00000029838	Ptn	-0.59107	0.0172952	0.134724	1.85994	2.00183	1.96964	1.87845	1.99683	1.11801	0.619911	0.98631
ENSMUSG00000032258	Lca5	-0.591911	0.0206642	0.149288	0.819124	1.14086	1.13128	0.876257	0.502305	0.458314	0.663545	0.671006
ENSMUSG00000069385	Gm10267	-0.591942	0.0489503	0.237274	13.5752	14.2841	25.4912	28.5062	9.87261	15.0263	12.9173	10.7046
ENSMUSG00000059897	Zfp930	-0.592828	0.0135539	0.115973	1.28544	1.91441	1.88183	2.07966	1.10247	1.21107	0.763246	1.23424
ENSMUSG00000025900	Rp1	-0.593091	0.00724747	0.0801757	0.580317	0.818205	0.741549	0.731692	0.456309	0.433694	0.342005	0.476708
ENSMUSG00000014905	Dnajb9	-0.594319	0.000110757	0.0038343	19.1235	26.7196	26.2771	26.1903	17.359	13.2187	11.3596	17.101
ENSMUSG00000040321	Zfp770	-0.595437	0.013503	0.115652	1.13635	1.36513	1.67387	1.68261	0.769422	0.748225	0.90145	1.02367
ENSMUSG00000020492	Ska2	-0.59573	0.00920576	0.0931276	1.88414	3.00207	2.11475	2.65515	1.60544	1.43214	1.0056	1.78522
ENSMUSG00000020354	Sgcd	-0.596821	0.000384038	0.0102732	2.25237	2.34195	2.9343	2.10852	1.30348	1.76615	1.06831	1.50686
ENSMUSG00000040855	Reps2	-0.598111	2.98893e-08	4.6592e-06	17.4409	18.5592	21.8291	18.2279	13.3558	11.8075	7.9124	12.2678
ENSMUSG00000039997	Ifi203	-0.599526	0.00178377	0.0310206	2.569	3.6763	5.16202	3.39859	1.97913	2.14262	2.06512	2.34512
ENSMUSG00000022863	Btg3	-0.600818	0.00906229	0.0920018	17.3238	14.4415	19.5388	24.9202	8.82566	12.346	10.7161	13.3252
ENSMUSG00000090272	Mndal	-0.602978	0.00930234	0.0936625	3.01475	4.00698	5.6842	3.27132	1.97682	1.70567	2.37706	3.02052
ENSMUSG00000041180	Hectd2	-0.606253	0.0299573	0.183507	0.570773	0.791975	1.14688	0.572037	0.576638	0.491155	0.186211	0.55598
ENSMUSG00000016150	Tenm1	-0.607574	0.00286892	0.0437663	0.459275	0.572154	0.696432	0.608957	0.468716	0.296077	0.22801	0.400134
ENSMUSG00000032006	Pdgfd	-0.608289	0.000689772	0.0159944	2.69002	2.1341	3.5897	2.15208	1.68701	1.38914	1.36932	1.6459
ENSMUSG00000104346	Pcdhga3	-0.609821	0.003657	0.0511473	1.02161	1.05843	1.18475	0.994621	0.602577	0.744761	0.46039	0.682379
ENSMUSG00000039530	Tusc3	-0.610563	9.2176e-06	0.000552637	10.583	9.9747	10.5667	8.26286	7.42147	6.81371	3.54543	5.51498
ENSMUSG00000054720	Lrrc8c	-0.613563	8.38919e-08	1.13267e-05	6.50677	5.35313	6.28586	4.44949	4.19356	3.02345	2.75301	3.14726
ENSMUSG00000059708	Akap17b	-0.618286	0.00044288	0.0115587	1.23168	1.27953	1.76161	1.13166	0.870227	0.655062	0.645716	0.938939
ENSMUSG00000020363	Gfpt2	-0.619141	1.67225e-06	0.000137196	8.9448	7.9251	9.29974	7.94633	5.29823	4.69045	4.38438	5.37351
ENSMUSG00000025964	Adam23	-0.619245	7.86452e-05	0.00291889	11.4159	10.2329	14.4318	8.18233	5.53705	7.79762	5.99555	5.47998
ENSMUSG00000054893	Zfp667	-0.621674	0.0060198	0.0713842	1.18642	1.32181	1.84805	1.6187	0.960839	1.08329	0.589699	0.874037
ENSMUSG00000027201	Myef2	-0.623167	0.00347029	0.0495875	4.07468	5.61733	6.62973	7.25871	3.74642	2.83635	3.37908	3.80968
ENSMUSG00000054203	Ifi205	-0.627862	0.0173654	0.134937	1.47282	1.39238	1.60654	1.90625	0.74461	0.891711	1.05837	0.967363
ENSMUSG00000073491	Ifi213	-0.628008	0.0218319	0.154435	0.790664	1.55613	2.23974	1.25118	0.939225	0.809837	0.836297	0.712265
ENSMUSG00000042104	Uggt2	-0.628202	0.000979316	0.0205537	1.48385	1.41222	1.83525	1.83931	1.00696	1.04285	0.873321	0.889685
ENSMUSG00000042817	Flt3	-0.628587	0.0191027	0.142604	0.829908	0.948325	0.938887	0.475283	0.455421	0.512718	0.445944	0.380423
ENSMUSG00000026644	Acbd7	-0.632512	6.55321e-05	0.00254802	104.748	152.844	144.118	133.526	82.2835	67.8374	76.658	79.0128
ENSMUSG00000039745	Htatip2	-0.633133	0.00313715	0.0463844	3.35523	3.52312	3.43599	2.76543	2.08762	1.55465	1.73956	2.08211
ENSMUSG00000012519	Mlkl	-0.637089	0.0220113	0.15532	1.34814	1.2159	1.40973	1.29598	1.01425	0.594916	0.703714	0.723601
ENSMUSG00000055116	Arntl	-0.639597	9.12472e-05	0.00326642	4.60274	4.87698	6.11178	5.10141	3.26907	3.23631	1.76413	3.7489
ENSMUSG00000031434	Morc4	-0.64365	2.76003e-07	3.14772e-05	4.98377	4.92557	5.87295	4.80703	3.65736	3.09248	2.04999	3.06606
ENSMUSG00000025431	Crisp1	-0.644596	5.54763e-06	0.000365867	5817.43	7131.95	7828.2	7908.64	4823.98	4022.13	3146.95	4690.18
ENSMUSG00000061535	C1qtnf7	-0.645273	0.000840208	0.018549	1.67405	1.96405	2.09818	1.68013	0.912785	1.10591	0.984146	1.17629
ENSMUSG00000078861	Zfp931	-0.645963	0.0136856	0.116601	1.75866	2.46293	3.31071	2.56479	1.4031	1.21284	1.53178	1.53665
ENSMUSG00000024525	Impa2	-0.648613	0.0436098	0.222661	1.12252	1.24067	1.23333	0.831287	0.908578	0.609798	0.424305	0.581727
ENSMUSG00000020672	Sntg2	-0.649198	0.0363319	0.202703	0.720002	0.854732	1.10227	0.801773	0.45742	0.568378	0.487191	0.445296
ENSMUSG00000025774	Crisp4	-0.651363	5.42781e-05	0.00217964	29.515	31.9164	33.6773	38.7925	24.9807	19.1005	13.0538	21.6036
ENSMUSG00000028238	Atp6v0d2	-0.655685	1.56263e-06	0.00012882	8.50832	11.3384	10.7069	8.89695	6.10389	6.38282	4.46438	5.3913
ENSMUSG00000031258	Xkrx	-0.657788	0.000930821	0.0196804	3.35328	3.19184	4.58178	2.43891	1.63476	2.11309	2.02168	1.62385
ENSMUSG00000037921	Ddx60	-0.659693	0.00143321	0.0266832	1.11173	1.29003	1.60126	1.45366	0.666153	0.765844	0.665047	0.977502
ENSMUSG00000035236	Scai	-0.660521	3.92036e-05	0.00172365	2.06527	2.43165	3.37089	2.72827	1.78322	1.68021	0.981681	1.61909
ENSMUSG00000047139	Cd24a	-0.660839	5.4029e-08	7.7203e-06	100.405	116.951	123.294	107.937	62.455	70.5718	51.5188	68.3716
ENSMUSG00000022324	Matn2	-0.661937	1.52228e-08	2.53423e-06	29.2799	24.0571	32.9226	17.3243	15.6266	15.3574	12.2157	13.8065
ENSMUSG00000070390	Nlrp1b	-0.662478	0.00879084	0.0900839	0.654993	0.665101	0.897347	0.575453	0.497252	0.372466	0.31276	0.385296
ENSMUSG00000050377	Il31ra	-0.664417	0.00677427	0.0766722	6.02752	3.97083	5.92781	3.97721	2.49211	2.05619	3.84623	2.21724
ENSMUSG00000025804	Ccr1	-0.664888	0.0279576	0.17713	0.930474	1.05805	1.50484	0.916288	0.512214	0.378558	0.746315	0.757931
ENSMUSG00000021553	Slc28a3	-0.666938	0.0462274	0.229754	0.506802	1.29899	1.1032	0.374896	0.432122	0.587068	0.398655	0.35262
ENSMUSG00000095218	Olfr1338	-0.668357	0.00331728	0.048123	2.57436	3.58113	3.34415	2.43637	2.67866	1.55674	0.717445	1.93082
ENSMUSG00000036875	Dna2	-0.670596	0.0104888	0.100701	1.06064	0.772637	1.39692	0.495763	0.591425	0.520357	0.398948	0.520917
ENSMUSG00000021994	Wnt5a	-0.673695	5.44256e-09	1.07268e-06	3.32015	3.49206	4.3598	2.54487	2.29361	2.03136	1.44104	1.83785
ENSMUSG00000024810	Il33	-0.675026	8.07273e-05	0.00297045	15.2394	15.9309	18.6078	16.782	8.0769	10.4454	9.60378	8.44032
ENSMUSG00000091744	Gm17732	-0.675582	1.05294e-08	1.90049e-06	216.217	281.507	324.24	260.546	178.728	146.739	122.255	158.622
ENSMUSG00000110576	Gm36368	-0.677112	0.0253391	0.167757	4.88129	11.9205	10.6889	11.6212	5.28819	6.20364	5.60555	4.77418
ENSMUSG00000002732	Fkbp7	-0.677191	0.00229266	0.0372981	6.05555	7.33392	12.4896	9.31216	6.00689	4.43392	3.96092	5.30563
ENSMUSG00000026365	Cfh	-0.678116	9.59938e-05	0.00340788	19.266	20.6155	32.2685	22.5605	10.5716	15.0419	12.4458	13.3678
ENSMUSG00000034071	Zfp551	-0.680105	0.0235534	0.16129	1.09182	1.08457	0.982961	0.895288	0.515251	0.850826	0.453345	0.435079
ENSMUSG00000070867	Trabd2b	-0.682508	0.0471125	0.232271	0.223477	0.264247	0.292855	0.175283	0.166667	0.117055	0.0976332	0.146025
ENSMUSG00000058900	Rsl1	-0.682848	0.00192454	0.0328032	1.83625	1.87992	3.11983	2.43007	1.45614	1.21875	1.02003	1.47098
ENSMUSG00000027985	Lef1	-0.687686	7.88799e-06	0.000483055	3.44681	4.09938	4.92179	3.71629	2.14331	2.4934	1.87951	2.37862
ENSMUSG00000091215	Pate1	-0.689235	2.22347e-07	2.62937e-05	163.785	186.559	243.182	173.375	120.004	95.1159	72.9665	138.159
ENSMUSG00000019929	Dcn	-0.691636	1.33503e-08	2.26652e-06	81.7235	75.7033	111.547	76.2895	47.9619	46.2602	44.8743	47.5825
ENSMUSG00000053790	Defb38	-0.694326	0.0118447	0.107257	523.79	666.613	696.144	898.175	411.383	339.152	355.055	460.413
ENSMUSG00000103037	Pcdhgb1	-0.699483	0.0020895	0.0348189	0.884835	1.0842	1.41845	0.830273	0.503877	0.744287	0.422792	0.613751
ENSMUSG00000071042	Rasgrp3	-0.700062	0.00452411	0.0589028	0.647759	0.709476	1.08003	0.56829	0.485256	0.4087	0.302152	0.437268
ENSMUSG00000063296	Tmem117	-0.705576	0.000378086	0.0101935	3.62966	4.17662	4.73829	3.45564	1.58625	2.69946	2.06962	2.20049
ENSMUSG00000053695	Defb37	-0.708367	4.16171e-05	0.00179293	277.083	431.808	396.687	415.172	266.475	168.587	165.681	247.51
ENSMUSG00000051228	Nyx	-0.708937	0.0105495	0.101019	1.16604	0.903635	1.06823	0.79921	0.974308	0.540285	0.192634	0.517851
ENSMUSG00000094786	Gm14403	-0.709015	0.00830838	0.0870274	2.60577	2.53095	3.89259	3.38054	1.4403	1.62628	1.50592	2.17563
ENSMUSG00000094995	Pate3	-0.709932	5.19677e-05	0.00210163	81.4191	98.863	111.941	118.607	73.9418	55.8598	34.1602	68.7465
ENSMUSG00000038141	Tmem181a	-0.710794	0.000863576	0.0188157	0.861934	0.749058	0.996184	0.750179	0.563138	0.483457	0.39368	0.388234
ENSMUSG00000029228	Lnx1	-0.714151	0.000935137	0.0197473	1.32821	1.55211	1.62632	1.31926	0.993008	0.750049	0.682476	0.745081
ENSMUSG00000078994	Zfp429	-0.71915	0.0353705	0.199822	0.728882	1.68139	1.6738	1.87842	0.849961	0.619168	0.610335	1.21713
ENSMUSG00000027858	Tspan2	-0.719817	0.000890201	0.0191522	1.19009	1.2534	1.11128	1.05929	0.608402	0.744096	0.458425	0.69435
ENSMUSG00000057596	Trim30d	-0.720747	0.00142214	0.0266216	1.1362	1.69342	1.60262	1.07702	0.937337	0.61723	0.608424	0.801445
ENSMUSG00000049001	Ndnf	-0.723451	0.00258309	0.0407472	0.49011	0.414213	0.438502	0.421024	0.206869	0.241839	0.250017	0.244461
ENSMUSG00000028128	F3	-0.724851	2.51129e-06	0.000189838	6.66289	5.67096	6.62503	5.51717	4.18587	2.95995	2.66673	3.44106
ENSMUSG00000049560	Defb20	-0.726513	0.0105514	0.101019	20.313	18.1912	11.314	10.9661	12.9548	6.64888	3.14933	11.3585
ENSMUSG00000091387	Gcnt4	-0.727245	0.0463022	0.229862	0.265414	0.356	0.380936	0.304002	0.125513	0.222535	0.19627	0.147735
ENSMUSG00000001225	Slc26a3	-0.730564	5.45978e-07	5.3804e-05	6.42564	7.72022	7.86835	6.46113	3.7556	4.25086	3.61342	3.51978
ENSMUSG00000020061	Mybpc1	-0.732893	0.00213976	0.0353813	1.22948	1.52854	1.0023	0.929431	0.725182	0.546892	0.53909	0.698038
ENSMUSG00000047996	Prrg1	-0.737063	3.1597e-05	0.00146828	24.1506	33.4134	34.3595	40.1412	22.6232	18.5176	12.8603	19.0807
ENSMUSG00000030236	Slco1b2	-0.738589	0.019292	0.14339	0.544366	0.793101	0.920819	0.935265	0.64942	0.396365	0.230874	0.486971
ENSMUSG00000070605	Zfp992	-0.738779	0.00329182	0.0478346	1.13044	1.09797	1.33853	1.27455	0.45925	0.785681	0.684117	0.625289
ENSMUSG00000069310	Hist1h3c	-0.743025	0.0195715	0.14459	4.08213	3.66754	3.69109	1.92869	1.84267	1.60774	1.39835	2.13018
ENSMUSG00000081058	Hist2h3c2	-0.750691	0.0230132	0.15936	2.14312	2.32647	2.49691	1.1371	0.910496	1.4019	0.921268	0.947302
ENSMUSG00000026065	Slc9a4	-0.754162	0.0394478	0.211657	0.827604	0.362515	0.572948	0.641245	0.219753	0.496256	0.237176	0.325172
ENSMUSG00000032602	Slc25a20	-0.758173	0.000331335	0.00920812	2.22024	2.38348	2.75725	1.70651	1.30816	1.12621	1.32363	0.917114
ENSMUSG00000040710	St8sia4	-0.758322	0.000792495	0.0178332	0.641204	0.454637	0.817215	0.644459	0.295228	0.368407	0.281149	0.396166
ENSMUSG00000089943	Ugt1a5	-0.763162	0.0178929	0.13708	0.933905	0.680315	1.08069	0.777191	0.579651	0.432725	0.373233	0.438606
ENSMUSG00000062980	Cped1	-0.765237	1.70877e-10	4.88337e-08	7.86437	8.5275	10.723	8.3477	5.00873	4.50259	4.1287	4.84917
ENSMUSG00000024087	Cyp1b1	-0.765942	1.37516e-16	1.81384e-13	13.6411	14.4915	14.4462	10.792	8.12708	6.66915	5.53178	7.58938
ENSMUSG00000031430	Vsig1	-0.768821	5.04069e-08	7.26325e-06	4.63141	5.35196	5.52232	3.93776	2.87326	2.61918	1.82246	2.83572
ENSMUSG00000079227	Ccr5	-0.775601	0.00118529	0.0233611	0.461081	0.425069	0.572036	0.443081	0.22577	0.253474	0.228441	0.274046
ENSMUSG00000032452	Clstn2	-0.778578	0.0381879	0.20814	0.486068	0.672399	0.596155	0.265715	0.146274	0.300293	0.336374	0.209065
ENSMUSG00000090641	Zfp712	-0.779876	0.0159233	0.128079	0.583308	0.472131	0.78138	0.821223	0.321817	0.285291	0.370028	0.40585
ENSMUSG00000060715	1700019A02Rik	-0.78516	0.00256874	0.0405582	6.46477	6.70921	6.10097	6.23818	4.55718	2.05168	2.1842	4.65822
ENSMUSG00000091474	2610021A01Rik	-0.789147	1.3137e-06	0.00011263	3.93404	4.30455	6.76177	4.19334	3.42118	2.4999	1.56948	2.48024
ENSMUSG00000067916	Zfp991	-0.798695	0.0252284	0.167477	0.777099	1.08778	1.65331	2.17938	0.577759	0.995485	0.730743	0.667905
ENSMUSG00000037872	Ackr1	-0.800338	0.0341951	0.196646	1.50557	1.2457	1.34454	0.910133	0.704786	0.413397	0.611249	0.791472
ENSMUSG00000036902	Neto2	-0.806151	0.00239065	0.0384544	0.469881	0.623359	0.661238	0.630083	0.33109	0.265512	0.261724	0.363611
ENSMUSG00000057894	Zfp329	-0.807248	1.20882e-06	0.000106061	1.90195	1.96801	2.37037	2.069	1.0872	1.23998	0.951637	0.949602
ENSMUSG00000066097	Cyp2j11	-0.809315	1.02213e-05	0.000598172	8.2505	11.9878	12.7657	11.6108	7.20631	4.4134	4.31979	7.11259
ENSMUSG00000061584	Lyg2	-0.811774	0.0447326	0.225926	0.877641	0.876794	0.323906	0.624684	0.452762	0.278849	0.251965	0.418724
ENSMUSG00000043832	Clec4a3	-0.81868	0.0209158	0.150406	1.18696	1.00876	1.78876	1.4445	0.625091	0.64164	0.677663	0.784561
ENSMUSG00000031289	Il13ra2	-0.823715	0.000193101	0.00605321	3.10052	4.1887	4.32056	4.60054	1.78128	2.42921	1.90534	2.07097
ENSMUSG00000032661	Oas3	-0.825426	0.00934101	0.0939415	0.490374	0.436601	0.856301	0.444654	0.209057	0.340823	0.186645	0.363935
ENSMUSG00000045337	Defb11	-0.827396	2.42597e-10	6.70937e-08	439.508	421.765	428.434	385.047	302.306	188.328	176.192	185.596
ENSMUSG00000024691	Fam111a	-0.827615	0.00144869	0.0269422	0.986097	0.782187	1.50021	0.917688	0.459961	0.56352	0.540468	0.493992
ENSMUSG00000085111	Ascl4	-0.828085	0.0402191	0.213708	1.02053	0.774395	0.71405	0.438339	0.66221	0.29554	0.262191	0.266272
ENSMUSG00000091183	Gm5141	-0.837218	0.0318585	0.18987	0.411761	0.304714	0.861141	0.656907	0.354036	0.327068	0.232846	0.212823
ENSMUSG00000029186	Pi4k2b	-0.837339	4.65505e-07	4.6953e-05	4.83379	4.91382	6.0499	5.13774	2.42236	3.05591	1.871	3.12951
ENSMUSG00000035896	Rnase1	-0.840326	0.0354293	0.200035	4.01834	4.40656	2.12089	3.22922	2.28198	3.30337	0.53284	1.08227
ENSMUSG00000027346	Gpcpd1	-0.843686	1.05041e-06	9.68354e-05	3.17335	3.97105	5.12227	4.56452	2.39852	2.09272	1.63141	2.32911
ENSMUSG00000078934	9230113P08Rik	-0.846436	0.00554621	0.0677567	1.65021	1.75996	1.89477	2.58503	1.25611	1.04949	0.443363	1.35079
ENSMUSG00000032099	Pate4	-0.853201	0.000168864	0.00553634	4.858	7.33988	5.99113	5.87342	4.43994	2.6678	1.80795	3.25488
ENSMUSG00000078502	Gm13212	-0.858856	0.0406332	0.214976	0.30403	0.486376	0.631438	0.599165	0.129166	0.182306	0.277726	0.388231
ENSMUSG00000056531	Ccdc18	-0.863622	0.00400874	0.0544243	0.542205	0.526635	0.539552	0.796995	0.369846	0.279146	0.25315	0.311862
ENSMUSG00000074472	Zfp872	-0.872368	0.00345423	0.0494459	1.0433	0.992231	1.66586	0.952254	0.490569	0.463272	0.754487	0.471836
ENSMUSG00000054423	Cadps	-0.873998	0.00020209	0.00628901	1.93936	1.92341	0.951311	1.15987	0.886508	0.705233	0.635372	0.696883
ENSMUSG00000031980	Agt	-0.887821	0.000691192	0.0159944	9.34993	4.85444	8.46159	4.46869	3.34575	2.42608	4.2239	2.41292
ENSMUSG00000027861	Casq2	-0.895486	0.000189975	0.00597706	4.52771	4.37326	2.53437	3.04676	2.65695	1.3753	1.21781	1.86916
ENSMUSG00000043263	Ifi209	-0.905589	0.00522655	0.0649418	0.523471	0.7445	0.998172	0.513923	0.337564	0.485101	0.222012	0.265358
ENSMUSG00000052821	Cysltr1	-0.909041	0.00241633	0.03865	0.437626	0.813684	0.72142	0.816323	0.304782	0.347613	0.342654	0.334067
ENSMUSG00000044176	Spink10	-0.912469	2.57522e-09	5.38504e-07	193.458	255.512	286.582	284.838	136.949	116.11	100.312	136.396
ENSMUSG00000061847	Defb39	-0.919373	3.33185e-07	3.59316e-05	526.85	719.134	623.97	667.809	492.454	261.73	191.341	304.402
ENSMUSG00000036469	44256	-0.921879	0.000745631	0.0169567	1.04667	0.732563	0.980873	1.1107	0.43078	0.442185	0.478058	0.475503
ENSMUSG00000075324	Fign	-0.931593	0.00859039	0.0890565	0.171731	0.17963	0.221829	0.136176	0.101372	0.0489672	0.0724029	0.10478
ENSMUSG00000059049	Frem1	-0.931872	9.17626e-14	5.61947e-11	5.49381	4.71738	6.28514	4.9018	2.64763	3.00671	1.89102	2.45966
ENSMUSG00000040035	Disp2	-0.937055	0.028235	0.178126	1.84361	5.23064	4.2281	1.49205	1.68193	1.84336	1.31183	0.866859
ENSMUSG00000024899	Papss2	-0.947417	1.06871e-07	1.39886e-05	2.44085	2.95486	2.7112	2.17276	1.11777	1.2621	1.09868	1.22572
ENSMUSG00000022366	Slc22a22	-0.949538	0.0127082	0.111862	0.515868	1.05485	0.771575	0.699713	0.269631	0.30193	0.421632	0.385375
ENSMUSG00000048040	Arxes2	-0.957221	0.000368357	0.00997823	3.35736	3.58705	4.44521	5.55191	1.81862	1.63342	1.99347	2.41772
ENSMUSG00000044807	Zfp354c	-0.961875	2.12089e-05	0.00107193	0.905542	0.99681	1.13332	0.964593	0.414212	0.548256	0.308819	0.564527
ENSMUSG00000078606	Gm4070	-0.9651	0.0211808	0.151391	0.0999344	0.180263	0.202852	0.147167	0.057999	0.0926093	0.0847675	0.0476789
ENSMUSG00000095930	Nim1k	-0.986743	0.0366784	1	0.169608	0.200038	0.166923	0.156107	0.0984355	0.0561342	0.0664	0.0910353
ENSMUSG00000028373	Astn2	-1.01014	7.74364e-15	7.37668e-12	5.5231	6.64895	6.33045	4.83366	3.06666	2.22272	2.3805	2.58714
ENSMUSG00000052133	Sema5b	-1.01968	3.31809e-05	0.00151721	1.46688	1.10217	1.70413	0.903473	0.487241	0.500141	0.379235	0.866559
ENSMUSG00000078763	Slfn1	-1.02908	0.0229025	0.159041	0.758829	0.97155	0.564356	0.414823	0.373675	0.127856	0.31508	0.345582
ENSMUSG00000024056	Ndc80	-1.04504	0.0209916	0.150604	0.671854	0.425583	0.679187	0.401495	0.316461	0.378979	0.106735	0.146335
ENSMUSG00000069268	Hist1h2bf	-1.04635	0.00443131	0.058149	5.02075	3.11559	4.32362	4.91206	2.89591	1.55091	1.91098	1.28088
ENSMUSG00000090053	Palm2	-1.06798	0.0487665	1	0.1769	0.190912	0.423161	0.253274	0.0887254	0.200364	0.07182	0.0820551
ENSMUSG00000048284	Tas2r126	-1.07676	0.0370475	1	1.38266	0.805771	0.952539	0.534491	0.561717	0.384393	0.252606	0.346326
ENSMUSG00000022899	Slc15a2	-1.0889	0.0420751	0.219089	3.97708	6.63101	11.162	8.75558	6.07625	3.40206	0.794256	3.42813
ENSMUSG00000058914	C1qtnf3	-1.09668	2.34767e-06	0.000180518	1.78746	2.19019	2.34443	1.37014	0.918577	0.76451	0.552642	0.94136
ENSMUSG00000035694	Caps2	-1.1145	0.000179166	0.00572096	1.51785	1.03419	1.67777	1.45959	0.511312	0.818764	0.269028	0.77551
ENSMUSG00000044827	Tlr1	-1.12754	0.0110396	0.103215	0.255049	0.495449	0.988358	0.693807	0.172693	0.393923	0.174736	0.248438
ENSMUSG00000078495	Zfp984	-1.13024	2.24889e-05	0.00112754	1.20153	1.44162	2.33314	1.86194	0.701889	0.720472	0.667151	0.688463
ENSMUSG00000038530	Rgs4	-1.1445	0.00303051	0.045265	0.787	0.594533	0.432991	0.507048	0.276307	0.182328	0.239636	0.237282
ENSMUSG00000044162	Tnip3	-1.18892	0.0412301	1	0.166743	0.161955	0.0957274	0.167113	0.0501786	0.0515071	0.0507723	0.081211
ENSMUSG00000069515	Lyz1	-1.22498	4.85276e-05	0.00200025	2.34165	2.57107	4.12069	1.70546	1.19489	1.13218	1.02302	0.637535
ENSMUSG00000073007	Fam46d	-1.23976	3.80917e-05	0.00167907	1.51959	2.61929	2.78306	3.19912	0.618313	0.93219	1.0362	1.21514
ENSMUSG00000074680	Defb26	-1.24476	0.000809922	0.0181066	191.161	270.048	210.807	282.258	170.615	82.4149	45.7493	87.3623
ENSMUSG00000079842	Spag11a	-1.24788	0.0224065	1	1.76955	1.86196	2.28577	1.14008	0.665644	0.546613	0.404111	0.984963
ENSMUSG00000050368	Hoxd10	-1.275	0.0412768	1	0.17702	0.412647	0.487809	0.304134	0.127851	0.0656177	0.129363	0.177358
ENSMUSG00000060962	Dmkn	-1.3038	0.0447371	1	0.155825	0.332971	0.456242	0.481897	0.112543	0.0577614	0.256218	0.0780617
ENSMUSG00000055214	Pld5	-1.31049	0.000431693	0.0113497	0.793182	0.414833	1.30042	0.484825	0.234104	0.438198	0.181139	0.191034
ENSMUSG00000031789	Cngb1	-1.33811	0.0396162	1	0.166214	0.0605402	0.0984052	0.107088	0.0375144	0.0481345	0.0569373	0.00867353
ENSMUSG00000060314	Zfp941	-1.40498	0.0118227	1	0.0834764	0.340533	0.40256	0.315522	0.0602899	0.0773576	0.076254	0.167272
ENSMUSG00000094942	Gm3604	-1.46224	0.00196821	0.033481	0.333992	0.513635	0.695075	0.669463	0.251273	0.154755	0.203397	0.116191
ENSMUSG00000045052	Prlhr	-1.46395	0.0440562	1	0.368093	0.556146	0.0704406	0.808083	0.110771	0.265309	0.112082	0.136591
ENSMUSG00000039710	Slc7a12	-1.5311	0.0150643	1	0.184645	0.860846	0.508823	0.571024	0.200037	0.102667	0.033734	0.339164
ENSMUSG00000064360	mt-Nd3	-1.58427	0.0344013	1	0.369503	2.15335	1.27279	5.71352	1.00076	1.19847	0.5063	0.462763
ENSMUSG00000067297	Ifit1bl2	-1.66917	0.0383826	1	0.0955327	0.25981	0.0987215	0.14772	0	0.0354121	0.0349069	0.0957155
ENSMUSG00000067929	Gm10226	-1.73986	0.0018297	1	3.27771	3.42848	3.69109	7.58069	2.04862	0.700951	0.690951	1.68409
ENSMUSG00000029269	Sult1b1	-1.75462	0.00412365	1	0.196917	0.54988	0.381544	0.54977	0.133333	0	0.112425	0.205515
ENSMUSG00000042282	Gucy2f	-1.79264	0.00135913	1	0.142487	0.0845752	0.115886	0.197204	0.0214396	0.0586859	0.0361554	0.0264371
ENSMUSG00000078640	Gm11627	-1.82592	0.0162133	1	1.02178	0.839755	0.67685	0.540154	0.141917	0.582698	0	0.065624
ENSMUSG00000058246	Gm10037	-1.94766	0.0414767	1	0.371639	0.902417	1.20014	0.159626	0	0.344398	0	0.232719
ENSMUSG00000038048	Cntnap5c	-1.98194	0.015777	1	0.0817775	0.174744	0.112676	0.12645	0.0738287	0	0.0149404	0.0273113
ENSMUSG00000039196	Orm1	-1.99223	0.0364388	1	0.248878	0.56404	0.500083	0.356327	0.0748957	0.153757	0.0757817	0.0692651
ENSMUSG00000057564	Olfr1508	-2.07412	0.0367461	1	0.0444093	0.043134	0.0286823	0.104911	0.0100232	0.020577	0.0101417	0.00926964
ENSMUSG00000022887	Masp1	-2.25218	0.0139906	1	0.1869	0.113458	0.201186	0.0802772	0.0210916	0.02165	0.0426823	0.019506
ENSMUSG00000059463	Spag11b	-2.44114	0.00464771	1	1.73666	0.143557	0.127279	0.253934	0.100076	0.0342419	0.135013	0.0925525
ENSMUSG00000050808	Muc15	-2.59728	0.0283981	1	0.432257	0.0547623	0.0485528	0.0161446	0.067868	0.0174162	0	0
ENSMUSG00000028661	Epha8	-4.17478	0.00613843	1	0.0409252	0.0265	0.117476	0.0117188	0	0	0	0

## Sheet: Cd
Gene ID	Gene name	log2FC	Pvalue	FDR	3M-Cd1	3M-Cd2	3M-Cd3	3M-Cd4	21M-Cd1	21M-Cd2	21M-Cd3	21M-Cd4
ENSMUSG00000068566	Myadm	-0.585545	0.00376218	0.118317	13.6653	15.2966	21.1251	12.7397	10.633	8.81095	10.4715	11.1483
ENSMUSG00000052928	Ctif	-0.586776	0.00563521	0.153302	2.82544	3.09308	2.4502	2.21435	1.86684	1.20271	1.96778	1.85011
ENSMUSG00000032648	Pygm	-0.586835	0.0235062	0.346211	7.11786	7.13265	5.13393	4.73665	3.96686	2.66155	5.52214	3.49528
ENSMUSG00000026421	Csrp1	-0.58684	0.00855201	0.194807	371.042	431.579	310.425	328.435	283.182	154.489	269.241	229.658
ENSMUSG00000034275	Igsf9b	-0.588919	0.00316273	0.105933	1.06572	1.17545	1.06792	0.895283	0.702374	0.494721	0.805358	0.733354
ENSMUSG00000034037	Fgd5	-0.589971	0.0328745	0.410092	1.94977	1.96992	2.99349	1.7004	1.15264	0.94126	1.77264	1.75606
ENSMUSG00000031523	Dlc1	-0.590139	0.00156567	0.0665857	5.72193	5.21783	7.42305	4.83823	3.36715	3.67696	3.57971	4.50301
ENSMUSG00000030352	Tspan9	-0.591973	0.00648871	0.167478	11.3633	11.5175	11.1337	10.0923	7.98762	4.49193	8.55116	7.57801
ENSMUSG00000030041	M1ap	-0.591975	0.0194556	0.31959	3.07016	2.43913	2.03927	2.27541	1.29905	1.35913	1.50641	2.21346
ENSMUSG00000055485	Soga1	-0.592657	0.0318331	0.404289	3.57117	3.53024	5.24546	3.38378	2.88381	1.40183	3.0893	2.84372
ENSMUSG00000038668	Lpar1	-0.594989	0.00421317	0.127484	6.69165	8.36467	11.5831	8.15888	5.00937	5.90547	6.13338	5.60307
ENSMUSG00000054008	Ndst1	-0.595797	0.0410789	0.454693	10.3442	8.95424	19.0456	8.8877	8.03063	5.17045	8.54773	8.90511
ENSMUSG00000019564	Arid3a	-0.598354	0.0386651	0.440713	3.25339	2.80774	5.67224	3.09313	2.56343	1.54225	2.8693	2.63224
ENSMUSG00000026817	Ak1	-0.598535	0.00874614	0.19816	6.72051	5.67433	6.54404	5.53494	3.33991	2.83248	4.12794	5.56359
ENSMUSG00000022687	Boc	-0.599071	0.00462376	0.135829	11.7291	11.9744	11.8935	9.89274	7.25497	4.78922	8.62609	8.73203
ENSMUSG00000027875	Hmgcs2	-0.601052	0.000661158	0.0356379	8.78765	8.0822	10.6574	9.07576	5.80668	4.85518	6.80912	6.19752
ENSMUSG00000037820	Tgm2	-0.601385	0.0132568	0.255842	29.7919	27.5744	34.0017	23.15	19.8793	10.8861	22.0161	21.0178
ENSMUSG00000026825	Dnm1	-0.602555	0.0318639	0.404459	3.73614	2.81081	4.55925	3.21163	2.43559	1.25803	2.94269	2.59693
ENSMUSG00000050288	Fzd2	-0.605038	0.0293862	0.388498	4.90678	4.0773	5.32748	3.76227	3.14606	1.52013	3.78277	3.16683
ENSMUSG00000041445	Mmrn2	-0.605288	0.0464995	0.47731	1.75555	1.14957	2.48855	1.11366	0.883912	0.948265	1.3056	1.05325
ENSMUSG00000032640	Chsy1	-0.605678	0.0408676	0.453654	1.89716	2.17391	4.34376	2.07933	1.72658	1.58929	1.91484	1.5464
ENSMUSG00000028988	Ctnnbip1	-0.606097	0.0477022	0.481769	2.34371	2.47506	3.85661	1.67602	1.95893	1.09377	1.75772	1.85599
ENSMUSG00000061751	Kalrn	-0.610186	0.000486356	0.0289045	4.02754	4.46803	4.17046	4.45537	3.01925	2.06986	2.92231	2.98302
ENSMUSG00000024014	Pim1	-0.610548	0.0445201	0.468469	16.5851	12.078	17.4813	14.1646	12.0542	4.32817	10.1812	12.0586
ENSMUSG00000027223	Mapk8ip1	-0.611477	0.0261076	0.366076	3.25053	2.68338	3.39214	2.56664	2.0705	0.996397	2.20001	2.35597
ENSMUSG00000025105	Bnc1	-0.611495	0.0341273	0.415445	0.725363	0.86984	0.705741	0.759649	0.291814	0.653729	0.578088	0.437582
ENSMUSG00000030956	Fam53b	-0.612645	0.0438367	0.467793	4.77099	4.07252	8.26419	3.86459	3.52952	2.03778	3.9093	3.9717
ENSMUSG00000078670	Fam174b	-0.613775	0.0110572	0.227202	1.82902	1.28796	1.37978	1.21104	0.872821	0.943354	0.93279	0.891454
ENSMUSG00000025348	Itga7	-0.615261	0.0300749	0.393396	8.16257	9.14962	7.48547	8.34743	6.4845	2.51843	6.42296	5.72656
ENSMUSG00000038539	Atf5	-0.615487	0.0450692	0.471313	12.2089	13.062	14.8521	10.797	9.33209	3.56176	10.6553	8.95597
ENSMUSG00000041119	Pde9a	-0.616427	0.0219961	0.336075	2.80586	3.03482	1.99759	2.79427	1.70105	1.06225	1.89182	2.14275
ENSMUSG00000036854	Hspb6	-0.618968	0.0186181	0.311799	12.5115	15.2339	10.6037	12.3643	7.90552	4.8007	11.4375	8.15376
ENSMUSG00000030218	Mgp	-0.621191	0.00680118	0.172094	134.95	121.644	207.176	108.125	78.6051	82.2827	98.6899	105.288
ENSMUSG00000032875	Arhgef17	-0.622272	0.0141956	0.265726	7.44991	7.77666	6.9856	7.00951	4.59018	2.55006	6.22389	5.21073
ENSMUSG00000017466	Timp2	-0.62591	0.00121569	0.055467	60.8132	60.6221	88.5457	53.68	41.7207	36.7131	45.4062	43.5923
ENSMUSG00000010830	Kdelr3	-0.627096	0.00228061	0.084524	9.36609	11.5564	14.2124	9.62739	7.75769	6.0859	6.99337	7.61172
ENSMUSG00000053080	2700081O15Rik	-0.628075	0.0084864	0.194555	4.24257	4.05019	4.80195	3.9189	2.50752	1.64597	3.2423	3.4038
ENSMUSG00000017817	Jph2	-0.628404	0.0426228	0.461857	12.9872	15.7446	9.83352	13.5829	9.5124	3.68644	10.7412	9.03091
ENSMUSG00000028469	Npr2	-0.628469	0.010904	0.225252	5.28234	5.32884	5.59194	4.79088	3.33385	1.90556	4.2862	3.7739
ENSMUSG00000019467	Arhgef25	-0.628688	0.00237041	0.086404	14.8096	13.6912	13.7201	12.1368	9.10843	5.6223	10.0192	9.62848
ENSMUSG00000029710	Ephb4	-0.629119	0.0212449	0.331847	7.6697	5.96488	8.2252	6.10553	4.62903	2.30682	5.55556	5.19411
ENSMUSG00000037606	Osbpl5	-0.62957	0.0182357	0.309194	4.76659	3.59275	5.01838	3.66087	3.24021	1.50681	3.22474	2.78461
ENSMUSG00000056679	Gpr173	-0.630782	0.0379863	0.436001	0.608893	0.675567	0.980361	0.750025	0.571196	0.289623	0.490339	0.566537
ENSMUSG00000055172	C1ra	-0.632008	0.00738412	0.180347	13.6851	13.0459	20.7389	11.3132	8.64125	7.50938	11.5488	9.46759
ENSMUSG00000015787	Abo	-0.633269	0.000326035	0.021715	10.7735	7.63243	8.76063	8.90894	6.39737	4.96918	5.49402	5.87707
ENSMUSG00000022840	Adcy5	-0.637294	0.0212967	0.331847	11.2644	12.3123	8.73995	11.241	7.60757	3.45159	8.74626	7.56922
ENSMUSG00000033278	Ptprm	-0.637981	0.00268246	0.0950675	3.53418	3.16224	4.80309	3.33793	2.12707	1.89797	2.44823	2.89401
ENSMUSG00000055538	Zcchc24	-0.639059	0.000146487	0.0123915	9.79768	10.1043	12.7569	9.46801	6.60082	5.67881	7.26167	6.98212
ENSMUSG00000039115	Itga9	-0.639719	0.000657079	0.0355225	3.34359	3.51248	4.33928	2.68933	2.36144	2.01103	2.13904	2.2146
ENSMUSG00000028631	Kcnq4	-0.640328	0.0241494	0.350931	1.78019	2.34636	1.88923	1.78684	1.05357	0.688889	1.54199	1.63256
ENSMUSG00000026208	Des	-0.642189	0.0314756	0.402172	171.337	213.658	136.23	150.58	136.826	51.4154	130.891	100.296
ENSMUSG00000040957	Cables1	-0.646105	0.0276717	0.377723	1.93248	1.19001	1.94659	1.3032	1.08879	0.612798	1.27618	1.00361
ENSMUSG00000026749	Nek6	-0.646367	0.0346812	0.418021	0.749195	0.963123	1.77	0.753234	0.60207	0.582144	0.743969	0.734559
ENSMUSG00000018909	Arrb1	-0.646386	0.0274186	0.375817	8.14553	7.905	16.2028	6.88585	5.85596	4.76919	7.72528	6.16799
ENSMUSG00000036046	5031439G07Rik	-0.646858	0.0190871	0.316653	22.8547	18.4136	33.6548	19.9368	17.736	8.74281	15.8911	16.9293
ENSMUSG00000024395	Lims2	-0.646955	0.0450891	0.471313	19.6657	18.573	12.3304	14.0502	11.2047	4.18077	12.2082	12.6623
ENSMUSG00000075304	Sp5	-0.64832	0.0483599	0.485098	3.26587	2.56589	2.01467	2.08078	1.84877	0.696365	1.94749	1.67993
ENSMUSG00000023411	Nfatc4	-0.649668	0.0166796	0.292879	6.06113	5.61644	6.27615	4.51137	4.27707	1.81772	3.99393	3.89653
ENSMUSG00000000359	Rem1	-0.649964	0.00409568	0.125072	10.0613	10.7066	10.6533	10.7461	8.0043	4.22767	7.6714	6.40011
ENSMUSG00000024937	Ehbp1l1	-0.653661	0.0112218	0.22896	8.07824	8.94452	11.9082	8.03926	5.17718	3.6185	7.79691	6.46122
ENSMUSG00000029484	Anxa3	-0.654891	0.0439628	0.467996	14.5677	14.5046	37.9645	15.6297	12.982	14.2464	13.0118	11.359
ENSMUSG00000045664	Cdc42ep2	-0.655723	0.0216337	0.333707	4.00501	3.49608	4.85932	4.20816	2.56257	1.47119	3.60268	2.68693
ENSMUSG00000027488	Snta1	-0.656296	0.0136687	0.259683	5.35468	5.68927	6.37797	4.96856	4.13537	2.05871	4.61172	3.08652
ENSMUSG00000001918	Slc1a5	-0.659038	0.0119568	0.23891	15.2495	13.5625	17.2201	11.795	9.35253	4.9893	11.6993	9.75624
ENSMUSG00000072082	Ccnf	-0.659283	0.0490655	0.487756	1.06838	1.02057	1.63826	0.95809	0.497142	0.508182	1.08333	0.829672
ENSMUSG00000000253	Gmpr	-0.659835	0.0208835	0.328552	5.72525	5.26382	5.95793	4.21931	3.58833	1.67311	4.17241	3.67091
ENSMUSG00000032135	Mcam	-0.660524	0.00104099	0.050058	17.8617	20.4571	17.8525	15.5562	10.6799	7.88444	13.7847	12.0629
ENSMUSG00000026121	Sema4c	-0.662216	0.0114774	0.232538	4.89151	4.78546	6.04672	4.0159	3.10345	1.74862	3.90524	3.45676
ENSMUSG00000030341	Tnfrsf1a	-0.663608	0.0126537	0.248427	23.5287	23.7971	34.5862	19.254	16.0924	9.62633	20.0733	16.7235
ENSMUSG00000023206	Il15ra	-0.664567	0.00815859	0.190817	4.92908	5.64187	8.01842	3.84767	3.3009	3.64438	3.87603	3.04783
ENSMUSG00000031790	Mmp15	-0.666123	0.0438238	0.467793	1.71556	2.03025	1.9156	1.15642	1.39213	0.470989	1.22438	1.10622
ENSMUSG00000033327	Tnxb	-0.668706	0.0429818	0.46358	30.3971	27.7615	26.4057	25.4295	17.8532	6.1962	22.4335	21.1379
ENSMUSG00000032609	Klhdc8b	-0.669675	0.00912921	0.20385	5.40345	5.46608	5.71557	4.23951	3.24816	1.80865	4.17664	3.57089
ENSMUSG00000023393	Slc17a9	-0.671085	0.0361588	0.425426	12.9422	12.0485	10.9257	7.92914	8.0452	2.81842	7.35174	8.64717
ENSMUSG00000020614	Fam20a	-0.673365	0.00207943	0.0801946	1.95481	2.31619	2.07426	1.59801	1.23851	1.02098	1.20697	1.4149
ENSMUSG00000056174	Col8a2	-0.67382	0.0336058	0.413957	2.62043	3.00147	2.92992	2.74157	2.14808	0.701113	2.01497	2.07044
ENSMUSG00000006273	Atp6v1b2	-0.674506	0.0443677	0.468374	33.6742	34.1049	90.1947	30.5786	30.911	28.8491	28.2841	27.9604
ENSMUSG00000062753	AI413582	-0.675985	0.0301228	0.393396	9.40601	8.40706	12.4621	6.96914	7.51893	3.29665	7.22852	4.7206
ENSMUSG00000075592	Nynrin	-0.676037	0.00511349	0.143314	4.5419	4.40575	4.40767	3.8859	2.71577	1.49767	3.21824	3.12863
ENSMUSG00000030474	Siglece	-0.676117	0.0450828	0.471313	1.79065	1.42543	1.5159	1.36341	0.733243	0.517124	1.45257	1.03484
ENSMUSG00000062661	Ncs1	-0.676182	0.00200869	0.0784279	1.01652	1.20839	1.12521	0.927064	0.569505	0.689009	0.708405	0.655385
ENSMUSG00000025075	Habp2	-0.676359	0.00985712	0.211064	1.32319	1.10272	1.20236	1.05475	0.788109	0.519491	0.715577	0.849652
ENSMUSG00000030247	Kcnj8	-0.676905	5.10408e-05	0.00594484	6.38107	6.80396	6.22665	5.47459	4.15998	3.26697	4.07259	3.73127
ENSMUSG00000015305	Sash1	-0.677057	0.0383952	0.438602	7.36677	6.46602	17.9646	6.71505	5.77393	5.23846	6.29699	6.35985
ENSMUSG00000028445	Enho	-0.678237	0.0247519	0.356335	3.40111	3.69231	4.4175	3.04607	2.62237	1.1967	2.88609	2.2146
ENSMUSG00000034656	Cacna1a	-0.679368	0.00962496	0.208883	1.37254	1.4779	2.21522	1.10968	0.987442	0.716721	1.1321	0.943008
ENSMUSG00000027254	Map1a	-0.680607	0.0050782	0.143096	2.83993	2.8975	2.3256	2.4114	1.54781	0.951288	2.10094	1.79004
ENSMUSG00000041794	Myrip	-0.681045	0.0331904	0.412266	1.00025	0.943124	0.95939	0.822161	0.314032	0.389793	0.83362	0.743467
ENSMUSG00000056737	Capg	-0.681935	0.0356773	0.423631	50.1705	44.0943	101.993	40.6953	41.5533	22.7792	38.0197	42.4539
ENSMUSG00000037946	Fgd3	-0.681991	0.0233622	0.345194	2.80641	2.56817	5.54966	3.91122	2.63661	1.48454	2.41669	2.55825
ENSMUSG00000040663	Clcf1	-0.682323	0.0467626	0.477848	1.06589	0.742427	1.50462	0.820591	0.746452	0.364403	0.808147	0.606364
ENSMUSG00000018566	Slc2a4	-0.683036	0.00371192	0.117214	8.61021	9.00642	7.03919	9.6322	5.36547	3.36448	6.80568	5.37455
ENSMUSG00000034853	Acot11	-0.683485	0.00356843	0.114239	2.0993	2.08992	2.43556	2.25503	1.31072	0.850248	1.59871	1.67117
ENSMUSG00000058385	Hist1h2bg	-0.685671	0.00854361	0.194807	10.8106	10.1406	13.0929	10.1527	5.48449	4.55056	7.60542	9.38518
ENSMUSG00000034612	Chst11	-0.686296	0.0270324	0.372749	1.98968	1.61073	3.64559	1.37848	1.49409	1.2924	1.30321	1.15759
ENSMUSG00000030249	Abcc9	-0.686906	7.081e-05	0.00746015	2.52294	3.05382	3.27226	2.65949	1.81615	1.98008	1.57099	1.64257
ENSMUSG00000025418	Bsnd	-0.687775	0.0211286	0.33146	3.64695	3.06022	3.08944	3.80114	2.48202	0.979592	2.0598	2.7554
ENSMUSG00000035783	Acta2	-0.688654	0.000353351	0.0230085	1082.88	1207.3	895.719	988.752	714.076	454.033	706.785	655.857
ENSMUSG00000032198	Dock6	-0.691476	0.0155541	0.279376	6.15297	5.72071	7.56379	5.01585	4.1472	1.82305	4.62243	4.21515
ENSMUSG00000002504	Slc9a3r2	-0.69178	0.0359227	0.425037	4.52219	4.09266	5.14368	3.35915	2.76414	1.08878	3.63133	2.87961
ENSMUSG00000020868	Xylt2	-0.693298	0.0248424	0.356972	5.25618	4.62836	9.00367	4.427	3.9926	2.00991	4.14979	3.97818
ENSMUSG00000066705	Fxyd6	-0.693951	0.0241842	0.351217	3.32914	3.22354	6.87371	3.36791	2.81777	1.80974	2.76519	2.80998
ENSMUSG00000020027	Socs2	-0.694012	0.0156544	0.279968	1.31014	1.54638	2.3438	1.0565	1.10409	0.83532	0.978496	0.873938
ENSMUSG00000007207	Stx1a	-0.695052	0.025085	0.358554	1.25504	1.05408	1.68393	1.24089	0.739395	0.519104	0.985893	0.938166
ENSMUSG00000072235	Tuba1a	-0.697724	0.00069748	0.0369091	37.8003	33.2141	39.0135	32.7555	25.0694	14.2747	22.6819	24.0702
ENSMUSG00000024544	Ldlrad4	-0.698139	0.00385335	0.119722	3.62852	3.26559	5.55791	3.28082	2.34835	2.00794	2.66885	2.49443
ENSMUSG00000033705	Stard9	-0.699602	0.0470938	0.479376	2.83833	2.67987	8.06827	2.74133	2.34228	2.33143	2.66766	2.54587
ENSMUSG00000028681	Ptch2	-0.702984	0.0489404	0.487679	9.22877	6.08147	5.27402	7.10811	4.76749	1.47608	4.4715	5.89482
ENSMUSG00000045934	Mtmr11	-0.703566	0.00231126	0.08525	3.15423	3.07016	3.67439	2.67595	1.75855	1.43055	2.57492	1.79902
ENSMUSG00000032482	Cspg5	-0.704178	0.0252042	0.359055	0.338149	0.342423	0.289026	0.377367	0.219309	0.164417	0.131888	0.296387
ENSMUSG00000017631	Abr	-0.705461	0.00418627	0.127168	16.1455	14.55	26.4915	14.322	10.3966	8.28971	12.5047	11.817
ENSMUSG00000063434	Sorcs3	-0.706247	0.0105601	0.220905	0.839524	1.1955	1.59575	1.11366	0.579724	0.589004	0.920922	0.774757
ENSMUSG00000021253	Tgfb3	-0.706375	0.000183853	0.0145438	7.68972	7.51376	9.25449	6.82256	5.44667	3.67429	4.88977	4.75455
ENSMUSG00000050556	Kcnb1	-0.706595	0.00122163	0.0555598	1.4313	1.817	1.31821	1.50187	0.900654	0.635421	1.10556	1.00256
ENSMUSG00000020889	Nr1d1	-0.706653	0.0150127	0.274636	17.3611	14.1419	10.4176	14.0825	7.90422	4.23749	10.5885	10.8118
ENSMUSG00000053617	Sh3pxd2a	-0.708736	0.00247516	0.0894996	5.93269	6.29686	8.12177	5.90513	3.48647	2.63379	5.03424	4.61143
ENSMUSG00000021759	Plpp1	-0.710869	0.000304136	0.0207943	9.3606	8.68642	12.4766	10.0614	5.05192	5.70192	6.95209	6.66044
ENSMUSG00000050989	Selenon	-0.711215	0.00734709	0.179821	5.54336	5.04936	9.05723	5.17118	3.32725	2.7102	4.76633	4.07885
ENSMUSG00000038156	Spon1	-0.711559	0.0142384	0.266144	9.73076	9.96276	20.3351	8.65641	7.21184	5.62358	8.12425	8.23008
ENSMUSG00000042985	Upk3b	-0.712293	0.00792321	0.188934	7.68773	8.3457	5.42334	6.57018	4.90562	2.35814	5.27407	4.15003
ENSMUSG00000022479	Vdr	-0.713084	0.0105794	0.221108	2.04294	2.73412	1.75477	3.30743	1.57942	0.978172	1.60634	1.73773
ENSMUSG00000026640	Plxna2	-0.713984	0.000174488	0.0138979	2.71518	3.05579	3.77955	2.55749	1.67461	1.55896	2.08999	1.91732
ENSMUSG00000009418	Nav1	-0.714253	0.000424299	0.0260169	7.69412	7.08171	10.1561	6.28246	4.38808	3.73479	5.37487	5.14202
ENSMUSG00000029674	Limk1	-0.719699	0.0340547	0.415382	4.25594	4.50273	7.096	3.67775	2.50194	1.39276	4.18305	3.5639
ENSMUSG00000024187	Fam234a	-0.721073	0.0204577	0.326432	14.1998	13.8144	24.8477	13.8771	11.532	5.1944	12.7867	10.1267
ENSMUSG00000017969	Ptgis	-0.721527	0.00989808	0.21128	8.41815	8.75619	8.96058	7.71055	5.87887	2.40249	5.82307	5.98794
ENSMUSG00000022817	Itgb5	-0.721993	0.0269774	0.372749	13.5467	11.0315	24.9877	10.7329	10.6499	5.15123	9.89692	10.1012
ENSMUSG00000033910	Gucy1a3	-0.722054	0.0462263	0.47631	3.41435	4.26523	10.8128	3.73474	2.66914	4.09596	3.01964	3.50387
ENSMUSG00000030089	Slc41a3	-0.722302	0.0354644	0.421705	1.88744	2.16114	3.35465	1.60259	1.32858	0.699563	1.79681	1.537
ENSMUSG00000043391	2510009E07Rik	-0.722881	0.00474377	0.137611	4.25909	3.61804	6.27779	2.87483	2.0526	2.98433	2.5414	2.53581
ENSMUSG00000037784	Dzip1l	-0.723534	0.0017096	0.0705668	1.99797	1.79074	2.40718	1.53253	1.38835	0.90509	1.08049	1.20963
ENSMUSG00000025422	Agap2	-0.727252	0.0206909	0.327354	3.04381	2.84892	3.07002	2.17799	1.84888	0.698942	2.15642	1.86824
ENSMUSG00000020272	Stk10	-0.727831	0.0458251	0.475096	2.37623	1.82956	4.72451	1.46016	1.27518	1.10789	1.9432	1.83214
ENSMUSG00000011256	Adam19	-0.728282	0.00171555	0.0705668	4.01073	4.11076	6.45424	3.57208	2.62607	2.16767	3.01236	2.94147
ENSMUSG00000031596	Slc7a2	-0.728469	0.0495758	0.490886	1.42763	1.23654	3.52344	1.32439	0.740132	1.53589	1.21156	0.975153
ENSMUSG00000037966	Ninj1	-0.728573	0.0488405	0.487039	22.1545	21.2818	49.402	21.4161	18.1472	7.79168	21.995	19.7353
ENSMUSG00000002006	Pdzd4	-0.729582	0.00311835	0.105207	0.953124	1.12122	1.22555	1.03011	0.76062	0.495862	0.661148	0.647646
ENSMUSG00000032380	Dapk2	-0.729964	0.0288231	0.386386	1.8351	1.02463	2.23836	1.42266	0.660772	0.920486	1.03342	1.24853
ENSMUSG00000029622	Arpc1b	-0.731018	0.0303508	0.39366	21.4787	20.5228	43.6195	18.3489	16.6717	8.20577	19.1871	17.3317
ENSMUSG00000073599	Ecscr	-0.734433	0.00652445	0.16784	4.9358	6.04619	7.73811	4.52594	3.37448	2.57495	3.17807	4.61607
ENSMUSG00000004530	Coro1c	-0.734591	0.018295	0.30952	11.4789	11.7481	24.6178	10.549	8.91351	5.64642	10.1616	9.72094
ENSMUSG00000058290	Espl1	-0.735132	0.00709638	0.176246	0.713405	0.662548	0.997078	0.659072	0.446159	0.296919	0.515579	0.532106
ENSMUSG00000025582	Nptx1	-0.73556	0.00203904	0.0791638	2.00591	1.71767	1.5307	1.70737	1.18125	0.636084	1.18174	1.08884
ENSMUSG00000066026	Dhrs3	-0.735874	0.00953636	0.207687	36.6328	37.2166	72.2784	33.6319	27.0816	18.7242	30.429	29.6796
ENSMUSG00000018334	Ksr1	-0.736022	0.0267923	0.371184	2.90507	2.56873	3.5802	2.03899	1.77195	0.696024	2.26612	1.7737
ENSMUSG00000035413	Tmem98	-0.736421	0.000494989	0.0292675	3.29469	3.19208	3.59476	3.0189	2.11331	1.79102	1.71946	2.08712
ENSMUSG00000044548	Dact1	-0.736843	0.00310545	0.104924	1.70081	1.82929	2.57905	1.53483	1.02991	0.986212	1.40478	1.08121
ENSMUSG00000032911	Cspg4	-0.739725	0.00937641	0.206584	4.49924	5.44511	4.07008	4.65636	2.92155	1.32284	3.5703	3.12924
ENSMUSG00000022500	Litaf	-0.740368	0.0451019	0.471313	22.6706	21.4099	65.5916	19.8768	19.825	15.351	20.7293	20.2792
ENSMUSG00000032572	Col6a4	-0.741599	0.00412675	0.12569	0.778046	0.75486	1.29145	0.889224	0.418028	0.557031	0.571404	0.640856
ENSMUSG00000068699	Flnc	-0.742411	0.018514	0.311543	11.1404	13.8031	9.22767	9.14884	6.91397	2.72574	8.49628	7.14514
ENSMUSG00000054675	Tmem119	-0.742784	0.0433627	0.465522	7.09376	7.23625	9.24662	6.5966	5.96467	1.5303	6.15309	3.94717
ENSMUSG00000026321	Tnfrsf11a	-0.743529	0.0422052	0.459648	2.43457	2.40009	6.71188	2.1508	1.8511	2.11464	2.39209	1.67714
ENSMUSG00000038486	Sv2a	-0.743838	0.00979113	0.210581	1.22776	1.16219	1.20803	1.03408	0.511889	0.428261	0.999977	0.772607
ENSMUSG00000036560	Lgi4	-0.744361	0.00825214	0.192229	1.5817	1.88605	1.76851	1.56809	1.06857	0.543361	1.37595	0.992374
ENSMUSG00000037185	Krt80	-0.744493	0.0256129	0.362361	3.93268	3.76375	4.5313	2.81053	2.74432	0.919448	2.71828	2.39312
ENSMUSG00000031749	St3gal2	-0.746795	0.00679202	0.17205	3.85997	3.82379	5.55798	2.52324	2.49531	1.61211	2.83265	2.24432
ENSMUSG00000033287	Kctd17	-0.746858	0.0174206	0.301325	13.6285	14.3941	18.5098	10.9668	8.87828	3.86088	11.2253	9.57722
ENSMUSG00000029765	Plxna4	-0.748532	0.000365814	0.0234222	1.73096	2.19686	2.32453	1.68799	1.19164	0.847364	1.33677	1.25839
ENSMUSG00000056749	Nfil3	-0.750537	0.009452	0.207147	3.38515	2.6307	3.83717	2.07383	1.76421	1.30479	2.4103	1.44616
ENSMUSG00000008398	Elk3	-0.750786	0.0273969	0.375742	2.58279	2.8784	6.86802	2.40737	1.94592	1.98967	2.44917	2.2288
ENSMUSG00000042918	Mamstr	-0.751502	0.0175892	0.302325	0.469441	0.632971	0.793159	0.605433	0.299022	0.260508	0.444276	0.461579
ENSMUSG00000037348	Paqr7	-0.751658	0.0115811	0.234026	2.64807	2.42526	4.40957	1.92523	1.73594	1.28333	2.13213	1.48222
ENSMUSG00000023259	Slc26a6	-0.751956	0.0232221	0.344756	0.77259	0.75192	1.44276	0.744894	0.621626	0.373934	0.475789	0.699108
ENSMUSG00000031486	Adgra2	-0.752795	0.0160768	0.284233	8.56059	7.94142	9.85167	6.85675	5.36015	2.09942	6.77172	5.014
ENSMUSG00000037465	Klf10	-0.752875	0.00912659	0.20385	8.27418	7.23457	13.8988	5.61316	5.83056	3.8248	5.07337	5.61799
ENSMUSG00000024663	Rab3il1	-0.753617	0.0260544	0.365768	6.36955	4.66463	12.496	4.73939	3.60468	2.95537	4.65976	5.2562
ENSMUSG00000005142	Man2b1	-0.75407	0.0249935	0.358255	46.5934	45.2831	111.277	41.3636	40.4711	23.8401	40.4224	37.4223
ENSMUSG00000020717	Pecam1	-0.754295	0.0201399	0.324593	6.83846	5.24246	14.0012	4.77018	4.11913	4.62578	4.66543	4.5354
ENSMUSG00000024247	Pkdcc	-0.755813	0.00928742	0.205601	7.44482	6.60879	8.45382	6.96256	4.5602	2.02353	5.66487	4.84025
ENSMUSG00000038366	Lasp1	-0.75602	0.00271433	0.0957712	22.1295	24.5693	32.1493	20.2246	15.2498	8.65917	16.4155	17.1782
ENSMUSG00000025577	Cbx2	-0.756246	0.00470865	0.137279	1.67726	1.72308	1.59752	1.29495	1.00362	0.517092	1.0903	1.03662
ENSMUSG00000056427	Slit3	-0.756959	0.00283961	0.0986274	33.4068	32.6119	43.6595	31.3645	21.7246	11.8988	26.7141	21.3306
ENSMUSG00000038271	Iffo1	-0.757337	0.010431	0.219991	3.14264	2.83645	5.27226	3.04391	2.47493	1.20914	2.30724	2.3025
ENSMUSG00000040543	Pitpnm3	-0.758217	0.00638744	0.165602	0.838823	0.902439	0.693838	1.05974	0.639291	0.308896	0.540102	0.538194
ENSMUSG00000042439	Zfp532	-0.758979	0.000111133	0.0100619	6.31739	6.14109	8.48582	6.34221	3.51635	3.21954	4.68095	4.4115
ENSMUSG00000027889	Ampd2	-0.760766	0.013322	0.256247	3.37809	3.07324	5.0073	2.65212	1.99766	1.0887	2.7047	2.37057
ENSMUSG00000002058	Unc119	-0.761374	0.0204777	0.326432	6.64115	5.21185	11.0707	5.10769	4.40505	2.29738	4.71943	4.7975
ENSMUSG00000001240	Ramp2	-0.761516	0.00314993	0.105703	6.20036	5.31006	7.69302	4.47259	3.41902	2.47356	4.46036	3.31741
ENSMUSG00000029093	Sorcs2	-0.76169	0.00344661	0.111728	6.73388	5.18266	7.28362	5.13388	3.7686	2.00065	4.50293	3.75089
ENSMUSG00000038552	Fndc4	-0.764141	0.0444103	0.468374	1.11506	0.652722	1.13341	0.5763	0.633955	0.337517	0.392462	0.640744
ENSMUSG00000023942	Slc29a1	-0.76524	0.00508721	0.143096	14.3807	12.2372	19.45	11.452	8.09255	5.00011	11.1284	8.90438
ENSMUSG00000041565	L3mbtl4	-0.765771	0.000904473	0.0447946	2.78086	2.20383	3.07144	2.90989	1.36106	2.07036	1.42304	1.46734
ENSMUSG00000006342	Susd2	-0.768116	0.00530553	0.147271	9.91993	11.4136	12.2931	10.8681	6.3726	3.32587	8.89031	7.01925
ENSMUSG00000037148	Arhgap10	-0.769765	0.0128363	0.250838	8.66531	8.39416	20.0634	7.79282	6.15458	6.01842	6.53161	7.19315
ENSMUSG00000026478	Lamc1	-0.770554	9.86526e-06	0.00177254	22.8287	24.9353	28.2743	22.4173	14.7637	11.0394	16.2092	14.5132
ENSMUSG00000063160	Numbl	-0.776289	0.00255628	0.0921452	2.39662	2.28469	3.04473	2.25111	1.42642	0.819453	1.80734	1.65802
ENSMUSG00000022484	Hoxc10	-0.776337	0.0262997	0.367066	1.30078	1.62607	1.8284	1.14449	0.516507	0.618723	1.31099	0.939669
ENSMUSG00000037679	Inf2	-0.776996	0.0142961	0.267006	5.02424	4.65509	8.36696	3.83649	3.5734	1.67287	3.60051	3.66148
ENSMUSG00000020877	Scrn2	-0.779752	0.0272266	0.374071	1.59999	1.43404	1.53339	1.62432	1.27063	0.398643	0.983261	0.886126
ENSMUSG00000027864	Ptgfrn	-0.780245	0.000142591	0.0122407	10.2079	10.7671	13.3601	9.14069	6.22313	4.63148	7.60167	6.33199
ENSMUSG00000040479	Dgkz	-0.78122	0.0167643	0.293896	10.8064	11.0704	20.0428	11.0054	7.93788	3.6831	10.132	8.44779
ENSMUSG00000019823	Mical1	-0.784749	0.0120072	0.239297	5.80691	6.41128	11.9408	5.53295	4.20982	2.60779	5.40911	4.69168
ENSMUSG00000036564	Ndrg4	-0.786507	5.91371e-05	0.0065898	12.2213	11.5212	11.7162	10.6225	6.57792	4.51628	7.93275	7.11515
ENSMUSG00000019124	Scrn1	-0.787133	0.0135783	0.258389	1.48731	0.864535	2.10001	0.943391	0.563728	0.818533	0.862948	0.820462
ENSMUSG00000023886	Smoc2	-0.787651	1.97606e-07	7.63351e-05	57.4533	61.051	66.6852	53.9243	35.7307	28.3012	36.8357	34.7533
ENSMUSG00000085795	Zfp703	-0.791164	0.00957259	0.208119	3.54516	3.5305	5.20125	2.9148	1.81827	1.19556	2.65311	2.95936
ENSMUSG00000000693	Loxl3	-0.794307	0.00392205	0.12112	1.99098	1.71506	3.21336	1.70879	1.26319	0.919572	1.42995	1.26942
ENSMUSG00000025511	Tspan4	-0.795046	0.0197547	0.322087	9.23552	8.1102	18.5783	8.1395	7.39845	3.87499	8.16099	5.42472
ENSMUSG00000091971	Hspa1a	-0.796334	0.00122252	0.0555598	10.6211	8.21193	7.20106	10.6113	6.81269	3.79136	5.76051	4.212
ENSMUSG00000027339	Rassf2	-0.797561	0.0105443	0.220772	4.35186	3.66369	8.6782	3.52471	2.79198	2.09048	3.44759	3.07941
ENSMUSG00000036599	Chst12	-0.797769	0.0257918	0.363405	6.67073	8.14089	10.6632	7.16186	4.78518	1.68904	6.67757	5.25861
ENSMUSG00000003420	Fcgrt	-0.800835	0.00800172	0.189249	24.284	21.2768	39.2604	19.465	17.2343	8.4844	18.4157	14.3912
ENSMUSG00000022208	Jph4	-0.80087	0.00694985	0.174144	0.921952	0.587127	0.565489	0.848616	0.480486	0.375885	0.462328	0.319684
ENSMUSG00000000308	Ckmt1	-0.801618	0.00163865	0.0688057	10.9488	9.14692	12.144	9.30227	4.90723	3.88853	5.87801	8.74768
ENSMUSG00000074364	Ehd2	-0.802328	0.000309786	0.0210564	11.3304	10.8237	12.7486	9.08332	6.78979	3.9445	7.15462	6.77489
ENSMUSG00000024413	Npc1	-0.804927	0.0471486	0.479408	7.28258	6.37993	25.2205	6.99777	6.22039	6.74235	6.20377	6.68998
ENSMUSG00000069306	Hist1h4m	-0.807142	0.0139757	0.263786	22.061	20.6886	28.2843	26.7564	15.0232	5.59651	17.6138	16.6591
ENSMUSG00000040260	Daam2	-0.807888	0.000559477	0.0315513	2.58781	2.66164	2.93478	2.23934	1.41747	0.898059	1.73799	1.78261
ENSMUSG00000062960	Kdr	-0.810056	0.000671108	0.0360068	5.14985	5.31908	8.97188	5.08767	3.16243	3.10467	3.19424	4.29986
ENSMUSG00000073982	Rhog	-0.810156	0.0348183	0.418716	11.3682	11.3059	29.6652	10.4324	8.16389	4.93899	11.552	10.5466
ENSMUSG00000048450	Msx1	-0.810715	0.0132486	0.255842	1.95551	1.99771	1.7765	1.65023	1.49685	0.494141	1.13564	0.988846
ENSMUSG00000028978	Nos3	-0.811488	0.0200598	0.324593	1.00161	0.836298	1.21589	0.813472	0.641313	0.217792	0.679545	0.622254
ENSMUSG00000040466	Blvrb	-0.814318	0.0436648	0.467034	5.73938	6.075	16.2804	5.21473	6.06423	2.65518	5.43848	4.41301
ENSMUSG00000042751	Nmnat2	-0.814929	0.00621921	0.161965	0.854091	0.593522	0.53592	0.531464	0.37204	0.303174	0.434314	0.28363
ENSMUSG00000049086	Bmyc	-0.815069	0.0207779	0.327613	4.27036	2.85994	3.28178	3.24843	2.13151	0.743829	2.23547	2.49396
ENSMUSG00000001870	Ltbp1	-0.816583	2.31042e-06	0.000575923	12.5674	12.1511	16.1485	11.2613	7.23324	6.12109	7.70445	7.95046
ENSMUSG00000031378	Abcd1	-0.821497	0.0128524	0.250838	4.23005	4.78444	10.2349	4.97556	3.47996	2.20477	4.50109	3.27819
ENSMUSG00000003352	Cacnb3	-0.821981	0.0195277	0.320396	2.41192	2.9295	4.22105	2.42447	1.55212	0.718274	2.29526	2.0999
ENSMUSG00000042349	Ikbke	-0.82296	0.0243566	0.352396	3.49329	2.84045	8.95866	3.08996	2.47303	1.98816	3.20006	2.54248
ENSMUSG00000020886	Dlg4	-0.824876	0.00377877	0.118678	4.13881	3.93059	4.63528	3.98646	2.47786	1.10635	2.98406	2.66367
ENSMUSG00000049420	Tmem200a	-0.825039	0.022317	0.338301	0.330459	0.569324	0.796809	0.612625	0.269566	0.287033	0.296675	0.435924
ENSMUSG00000037206	Islr	-0.825328	0.00290301	0.0999791	25.3196	24.5817	24.7891	20.1858	14.4431	6.35064	16.6675	14.8477
ENSMUSG00000026840	Lamc3	-0.825603	0.00598952	0.158476	1.00704	0.987626	0.918799	1.14504	0.587811	0.277823	0.779776	0.600896
ENSMUSG00000014303	Glis2	-0.826154	0.00663515	0.169688	5.03178	4.46673	5.30458	4.24144	2.58831	1.16562	3.54202	3.22185
ENSMUSG00000039206	Daglb	-0.828668	0.0266514	0.369895	4.8128	4.56352	13.186	4.14674	3.57599	2.57179	4.15533	4.48733
ENSMUSG00000015468	Notch4	-0.83056	0.0253123	0.360153	1.38143	1.68839	2.16643	1.32594	0.953698	0.307209	1.11135	1.25195
ENSMUSG00000006221	Hspb7	-0.832554	0.0114527	0.232241	3.54442	4.75915	2.63566	2.85265	2.24781	0.853118	2.09422	2.37536
ENSMUSG00000063856	Gpx1	-0.835656	0.0257279	0.362947	78.3717	80.6419	202.512	72.2213	69.0415	31.3754	72.0305	65.9299
ENSMUSG00000095115	Itpripl2	-0.836114	0.029506	0.389237	3.7808	3.01164	9.94531	2.56236	2.41476	2.72827	2.9609	2.50848
ENSMUSG00000034595	Ppp1r18	-0.837644	0.0301437	0.393396	4.27823	3.78938	10.58	3.14761	2.7805	1.86738	3.65483	3.682
ENSMUSG00000060512	0610040J01Rik	-0.838007	0.0380091	0.436001	0.647767	0.729198	0.948138	0.836969	0.583112	0.252094	0.607977	0.29778
ENSMUSG00000023169	Slc38a1	-0.838668	0.000449767	0.0273111	2.72279	3.40747	5.00061	2.59437	1.92382	1.74858	1.9843	1.87436
ENSMUSG00000002012	Pnck	-0.838681	0.00367115	0.116402	8.73765	10.181	7.81569	8.86272	5.49657	2.30692	6.0405	5.64464
ENSMUSG00000001657	Hoxc8	-0.840128	0.00194797	0.0769167	3.05857	2.16045	3.59228	2.59567	0.970266	1.56868	1.75736	1.96355
ENSMUSG00000038059	Smim3	-0.840498	0.0152551	0.278193	1.96681	1.65316	4.13164	1.75066	1.3667	1.07727	1.4768	1.29594
ENSMUSG00000012017	Scarf2	-0.845285	0.0304041	0.39369	4.78073	6.11944	7.39942	5.10671	3.35937	0.919813	4.28876	4.21928
ENSMUSG00000052957	Gas1	-0.845511	2.64974e-07	9.7485e-05	30.011	31.9648	38.3823	28.2281	17.087	15.3481	19.9553	17.7303
ENSMUSG00000048038	Ccdc187	-0.847282	0.00134655	0.0592225	0.335083	0.350383	0.388534	0.417454	0.1811	0.159384	0.230633	0.24475
ENSMUSG00000056133	Gm9992	-0.84946	0.0481038	0.48392	0.964978	1.02947	1.02915	1.72319	0.425539	0.317768	0.996273	0.863319
ENSMUSG00000008734	Gprc5b	-0.850596	0.0207498	0.327613	3.78191	3.43533	9.48138	2.6163	2.80985	2.14124	2.70212	2.85869
ENSMUSG00000031207	Msn	-0.851091	0.0366325	0.426668	15.558	15.6408	56.051	14.4208	12.2225	13.7465	15.2523	14.2716
ENSMUSG00000025213	Kazald1	-0.851802	0.000501254	0.0295625	3.89305	4.61345	3.645	3.61983	2.73049	1.52294	1.87818	2.42857
ENSMUSG00000036256	Igfbp7	-0.853862	0.000547075	0.0311551	99.6231	97.7618	142.04	83.8916	59.8283	36.9341	70.0953	62.4352
ENSMUSG00000075702	Selenom	-0.857937	0.00912043	0.20385	9.00053	12.0467	14.7062	9.1347	6.62956	2.62578	7.68173	7.36303
ENSMUSG00000006205	Htra1	-0.858541	0.00184169	0.0737248	12.8907	11.6794	24.0198	11.1438	8.72603	6.53113	8.04507	9.02334
ENSMUSG00000000594	Gm2a	-0.86039	0.0239877	0.349678	15.8876	12.9145	47.4517	14.253	12.1101	11.9931	12.646	12.2573
ENSMUSG00000035403	Crb2	-0.862	0.00303955	0.102998	0.519604	0.432008	0.381781	0.378046	0.222441	0.167711	0.277807	0.253365
ENSMUSG00000049191	Rtl5	-0.862467	0.0391424	0.443252	1.96951	1.6993	5.42148	1.34846	1.29794	0.954942	1.52176	1.8762
ENSMUSG00000025534	Gusb	-0.86611	0.0309149	0.397435	18.901	20.0317	67.8629	18.0969	17.4304	14.527	17.106	18.3589
ENSMUSG00000021319	Sfrp4	-0.866392	1.66977e-06	0.000442898	4.65804	3.78986	4.0098	3.87402	2.00904	2.31981	2.62314	1.80165
ENSMUSG00000024451	Arap3	-0.866437	0.00796822	0.189035	1.40339	0.86329	2.24741	1.10455	0.955529	0.570631	0.77119	0.721102
ENSMUSG00000024299	Adamts10	-0.866637	0.00990859	0.21128	5.69571	5.32964	12.1144	5.89982	3.79833	2.21103	5.125	4.5125
ENSMUSG00000001739	Cldn15	-0.867081	0.00138985	0.0606667	3.0774	2.70983	2.2244	2.70975	1.55522	0.887143	1.89349	1.41469
ENSMUSG00000030399	Ckm	-0.868083	0.0119965	0.239289	8.10738	9.65474	4.08885	4.49477	3.82071	1.96919	4.9643	3.27102
ENSMUSG00000081683	Fzd10	-0.869002	0.00802833	0.189491	1.05513	1.06326	0.84616	0.827389	0.530929	0.242286	0.563454	0.699133
ENSMUSG00000001270	Ckb	-0.870531	0.00762997	0.18429	34.716	43.1172	56.089	32.776	24.0295	10.4605	33.2403	21.4408
ENSMUSG00000028782	Adgrb2	-0.870781	0.033056	0.411037	1.04066	1.05357	1.26842	0.834357	0.703272	0.141428	0.708405	0.693937
ENSMUSG00000028763	Hspg2	-0.870922	0.0133633	0.256337	25.3089	25.7404	32.4572	22.9621	15.464	4.86052	19.5983	17.0359
ENSMUSG00000029177	Cenpa	-0.871605	0.0273177	0.374878	1.134	0.984874	3.05694	1.01562	0.680053	0.916233	0.99436	0.738395
ENSMUSG00000059991	Nptx2	-0.872691	0.0078264	0.187397	2.33137	3.21022	2.50245	1.8335	1.79823	0.621	1.34791	1.509
ENSMUSG00000032691	Nlrp3	-0.872837	0.043036	0.463948	0.470518	0.305882	0.986415	0.445828	0.22989	0.209817	0.364332	0.386633
ENSMUSG00000057137	Tmem140	-0.873497	0.0306208	0.394952	4.21535	3.97869	14.2408	3.99416	3.67718	3.16679	3.82906	3.513
ENSMUSG00000045333	Zfp423	-0.874738	0.000357325	0.0231343	1.91576	2.05297	2.6297	1.8609	0.979582	0.905512	1.59226	1.04795
ENSMUSG00000032131	Abcg4	-0.876082	0.0223651	0.338809	0.857505	0.512609	0.542207	0.896562	0.292795	0.182842	0.518977	0.508378
ENSMUSG00000052353	Cemip	-0.877432	2.10077e-05	0.00306237	3.60012	4.06879	3.98627	4.39598	2.08857	1.66892	2.84131	1.96764
ENSMUSG00000032360	Hcrtr2	-0.878526	0.0153536	0.278533	0.393004	0.373747	0.39372	0.357487	0.196626	0.209367	0.243449	0.158985
ENSMUSG00000040009	Gnaz	-0.878992	0.000127025	0.0112374	4.23391	4.42723	3.57676	3.88439	1.90884	1.43849	2.81007	2.42983
ENSMUSG00000031262	Cenpi	-0.879247	0.0363822	0.426018	0.28588	0.3363	0.687233	0.558688	0.186237	0.288958	0.23981	0.289123
ENSMUSG00000031750	Il34	-0.879818	0.0466452	0.477653	0.822988	0.782662	1.23673	0.467882	0.308815	0.375801	0.71373	0.366223
ENSMUSG00000039057	Myo16	-0.88062	0.000431381	0.0263814	0.676262	0.580055	0.464745	0.60952	0.257884	0.28244	0.315039	0.383671
ENSMUSG00000035105	Egln3	-0.882078	0.0353579	0.421693	2.42091	2.53023	7.01293	1.51522	1.85201	1.41563	1.78858	2.1339
ENSMUSG00000004105	Angptl2	-0.882418	0.00596049	0.158476	3.8873	3.40653	8.00928	3.2898	2.59732	1.7542	2.76133	2.78894
ENSMUSG00000024940	Ltbp3	-0.884464	0.0128676	0.250838	8.24767	7.33526	11.81	6.95137	5.07017	1.65809	6.15113	5.32273
ENSMUSG00000036862	Dchs1	-0.884789	0.00358429	0.114589	2.67743	2.74492	3.60468	2.42755	1.48993	0.726989	2.16827	1.6903
ENSMUSG00000004849	Ap1s1	-0.887869	0.0390317	0.442903	3.97652	6.01709	12.1561	3.39522	3.87153	1.95381	5.00779	2.69582
ENSMUSG00000028059	Arhgef2	-0.889403	0.0159437	0.28231	7.02848	6.33674	19.5552	7.20842	5.1995	3.6186	6.25085	6.24299
ENSMUSG00000038777	Sema6c	-0.889519	0.0328437	0.410092	0.858712	0.816176	1.29747	0.813653	0.459623	0.14351	0.622988	0.786303
ENSMUSG00000031453	Rasa3	-0.890709	0.0198765	0.323296	6.48425	6.51656	20.1981	6.24577	5.34537	4.20176	6.47277	4.87424
ENSMUSG00000047592	Nxpe5	-0.891672	0.0235258	0.346211	0.395806	0.555468	0.914608	0.500049	0.446937	0.251023	0.323508	0.233506
ENSMUSG00000009092	Derl3	-0.892972	0.0301762	0.393599	1.47697	0.931078	2.20187	1.0602	0.933016	0.425775	0.739329	0.905288
ENSMUSG00000029576	Radil	-0.895339	0.00923539	0.204644	1.08908	1.10843	1.12095	1.01779	0.761963	0.212888	0.63151	0.678966
ENSMUSG00000045246	Kcng4	-0.900111	0.0441076	0.467996	0.248548	0.261607	0.611387	0.456294	0.275259	0.133002	0.208495	0.219947
ENSMUSG00000094430	Gm933	-0.901821	0.00462169	0.135829	23.5971	18.8043	14.4869	22.4415	11.7987	5.05293	9.16961	15.587
ENSMUSG00000019558	Slc6a8	-0.902787	0.0204501	0.326432	8.11382	8.36281	25.5486	7.97072	7.05804	4.38438	7.7456	7.08963
ENSMUSG00000028641	P3h1	-0.905147	0.00117263	0.0540341	3.74622	4.15202	7.28247	3.49693	2.66761	1.92305	2.75718	2.43829
ENSMUSG00000059326	Csf2ra	-0.906855	0.0351457	0.4206	10.1683	8.7743	24.5691	7.99869	7.46575	2.58562	9.30964	7.56726
ENSMUSG00000026572	Tbx19	-0.907356	0.0464501	0.47731	0.511218	0.330278	0.357868	0.400151	0.278011	0.105723	0.160634	0.292228
ENSMUSG00000030699	Tbx6	-0.908327	0.0477445	0.481769	0.71893	0.746105	1.80673	0.746083	0.570939	0.32568	0.42414	0.796333
ENSMUSG00000028439	Fam219a	-0.912211	0.0446326	0.469159	3.20538	2.61703	10.3974	2.55324	2.34974	1.40738	3.25479	2.79645
ENSMUSG00000030748	Il4ra	-0.914495	0.0195978	0.320563	4.79197	4.5799	11.7522	3.78377	3.4471	1.61586	4.15765	3.74283
ENSMUSG00000021765	Fst	-0.916322	2.99546e-06	0.000708457	7.92236	8.58806	10.7916	6.94902	3.8929	4.86652	4.93094	4.09769
ENSMUSG00000035863	Palm	-0.91648	0.00276131	0.0969722	9.30788	8.51134	14.245	8.12049	5.15621	2.6626	6.67529	6.38537
ENSMUSG00000044629	Cnrip1	-0.917566	0.00844965	0.194201	1.51035	1.19696	2.94761	1.48314	0.915942	0.940462	1.13406	0.722086
ENSMUSG00000004846	Plod3	-0.91916	0.0189346	0.315732	5.82222	5.10695	11.3993	4.32114	3.92676	1.37183	4.29891	4.21112
ENSMUSG00000022305	Lrp12	-0.919976	0.0444165	0.468374	1.93642	2.49789	9.04678	1.90081	1.90221	1.85539	2.11428	2.14155
ENSMUSG00000042589	Cux2	-0.920562	0.00474984	0.137615	1.34616	1.50024	1.00544	1.46686	0.898007	0.28814	0.806095	0.755597
ENSMUSG00000031659	Adcy7	-0.92094	0.0315883	0.402783	5.15629	3.97613	16.3072	3.92553	3.51052	2.88266	4.79013	4.0593
ENSMUSG00000057706	Mex3b	-0.922492	0.0106131	0.221414	0.898747	0.907779	1.08765	0.718006	0.312262	0.251467	0.564014	0.748542
ENSMUSG00000002458	Rgs19	-0.923274	0.0337809	0.413957	3.16943	2.36448	10.29	3.04019	2.69179	2.30786	2.22187	2.57222
ENSMUSG00000044456	Rin3	-0.92597	0.030285	0.39366	3.94967	2.85924	11.4956	3.13787	2.92928	1.71972	3.19947	3.24167
ENSMUSG00000030098	Grip2	-0.930907	0.00165307	0.069036	0.674779	0.700284	0.77603	0.89309	0.279102	0.275111	0.541848	0.476621
ENSMUSG00000026956	Uap1l1	-0.935772	0.0263485	0.367066	4.83721	4.54703	15.5386	4.43285	4.17708	2.21688	3.95517	4.74926
ENSMUSG00000032657	Fam189b	-0.937237	0.00799724	0.189249	2.16703	2.18471	3.00191	2.01698	1.13937	0.456089	1.58393	1.62917
ENSMUSG00000060063	Alox5ap	-0.93886	0.0450019	0.471313	6.56927	4.4477	22.0249	6.04545	3.94089	3.55183	7.41664	5.16209
ENSMUSG00000009772	Nuak2	-0.942431	0.0407835	0.453418	1.40815	1.16875	4.3234	1.17199	0.892552	0.597387	1.43418	1.21244
ENSMUSG00000034675	Dbn1	-0.942866	0.000705242	0.0371502	7.37603	6.717	7.21628	5.67855	3.66391	1.68113	4.3034	4.07953
ENSMUSG00000074228	Gm10645	-0.948665	0.0202496	0.325257	1.35604	1.2896	1.35851	0.770933	0.734986	0.464407	0.72801	0.493714
ENSMUSG00000025375	Aatk	-0.952059	0.0414918	0.455997	1.05332	1.17955	1.90075	0.581474	0.477349	0.174268	0.879442	0.861482
ENSMUSG00000056091	St3gal5	-0.956742	0.0213703	0.332207	2.08471	1.70497	6.07126	1.72267	1.31387	1.26833	1.65178	1.64256
ENSMUSG00000037936	Scarb1	-0.958098	0.00967811	0.209286	3.72747	3.80615	10.5838	3.44132	2.7097	2.07304	3.05895	3.07381
ENSMUSG00000048677	Tpcn2	-0.958665	0.0354787	0.421705	5.43233	4.32469	17.5459	3.94937	3.66501	2.34902	5.18021	4.61493
ENSMUSG00000026185	Igfbp5	-0.960881	1.14653e-09	1.09439e-06	39.9669	41.4548	31.5408	30.1372	18.8797	15.6392	17.8061	19.5033
ENSMUSG00000043885	Slc36a4	-0.960934	0.0168009	0.293896	2.00725	1.92574	7.02006	2.13324	1.62099	1.83211	1.54026	1.62768
ENSMUSG00000020810	Cygb	-0.96339	0.000790357	0.0404391	24.8314	24.1965	32.5341	23.0237	13.8268	6.78027	18.671	13.185
ENSMUSG00000055653	Gpc3	-0.964059	0.000396743	0.0248392	12.6198	11.735	24.5094	13.4491	7.73103	9.56874	6.25283	7.85204
ENSMUSG00000027460	Angpt4	-0.964202	0.00106576	0.0508081	4.73494	4.9163	7.22498	3.28689	2.05859	1.97519	3.60755	2.48396
ENSMUSG00000032754	Slc8b1	-0.966214	0.03103	0.398497	5.22278	4.3452	15.548	4.42679	4.25298	1.70792	5.01302	3.85836
ENSMUSG00000006958	Chrd	-0.968136	0.000451296	0.0273111	2.42881	2.27311	2.70066	2.53023	1.45462	0.638276	1.57936	1.30283
ENSMUSG00000021280	Exoc3l4	-0.973723	0.00100254	0.0485112	4.98173	4.678	4.76553	3.65498	2.56023	1.02024	2.55379	2.869
ENSMUSG00000044254	Pcsk9	-0.974915	0.00355352	0.113919	0.822792	0.914884	1.02135	0.700065	0.560075	0.207664	0.468078	0.492483
ENSMUSG00000033685	Ucp2	-0.977109	0.0199087	0.323491	19.3026	18.167	55.6566	15.0448	14.9738	6.74149	16.347	15.8632
ENSMUSG00000079442	St6galnac4	-0.980303	0.0203119	0.325744	3.20825	2.92919	9.70683	2.52158	2.48106	1.46273	2.97649	2.21294
ENSMUSG00000029061	Mmp23	-0.981973	0.0086492	0.196348	9.48284	7.556	17.2595	7.61794	5.62969	2.43179	7.7046	5.0037
ENSMUSG00000024738	Pga5	-0.983151	0.0283821	0.383053	1.16828	1.15733	0.746436	1.06745	0.869806	0.317543	0.603085	0.253187
ENSMUSG00000046079	Lrrc8d	-0.983231	0.020533	0.326673	1.59765	1.67457	5.55956	1.39662	1.05288	1.10803	1.64947	1.2822
ENSMUSG00000033066	Gas7	-0.983834	0.000926779	0.045607	7.16978	7.38435	15.6627	6.05634	3.91537	4.44897	5.10473	4.54359
ENSMUSG00000049265	Kcnk3	-0.993026	3.11129e-05	0.00414446	3.80091	3.31959	3.0668	3.23397	1.76258	1.09213	2.24238	1.49054
ENSMUSG00000037660	Gdf7	-0.993269	0.0092213	0.204542	3.15768	2.55186	2.56435	2.67705	1.47243	0.395256	1.75873	1.76483
ENSMUSG00000031387	Renbp	-0.996251	0.028277	0.38216	3.22745	3.1145	11.5227	2.53084	2.72603	1.7469	2.98741	2.58874
ENSMUSG00000026482	Rgl1	-0.996541	0.0228123	0.341345	5.01597	4.55487	18.3311	3.86163	3.60653	3.67823	3.89597	4.49749
ENSMUSG00000035735	Dagla	-0.997929	0.00283044	0.0986274	1.71053	1.51777	1.94306	1.49151	0.875055	0.31946	1.15928	0.912727
ENSMUSG00000035561	Aldh1b1	-1.00387	0.00601845	0.158687	0.951945	1.35081	2.14025	0.926372	0.697245	0.489512	0.823441	0.624483
ENSMUSG00000061615	Hist1h2ab	-1.00466	0.0498879	0.492672	3.8749	2.60032	5.59038	2.13188	2.60574	0.594555	2.58101	1.13773
ENSMUSG00000023153	Tmem52	-1.00524	0.0256461	0.362361	2.80959	1.93617	2.23996	3.41451	1.33692	0.348625	1.19812	2.22375
ENSMUSG00000000957	Mmp14	-1.00685	0.00909752	0.203732	17.821	17.3465	52.7054	16.2631	12.5421	8.30298	15.0246	15.0871
ENSMUSG00000061451	Tmem151a	-1.00721	0.000517992	0.0300903	1.66774	1.78369	1.22773	1.58023	0.861468	0.393124	0.914242	0.880644
ENSMUSG00000046470	Sox18	-1.01137	0.0245328	0.354503	1.97078	1.04846	3.95005	1.59072	0.608649	0.833257	1.05503	1.69786
ENSMUSG00000042988	Notum	-1.01259	0.0116681	0.235169	3.98255	3.75987	5.04464	4.10281	2.06162	0.53397	2.78713	2.83834
ENSMUSG00000031875	Cmtm3	-1.01316	0.00796373	0.189035	10.4271	10.0756	30.2714	8.83997	6.90239	5.91685	8.87661	7.32628
ENSMUSG00000047420	Fam180a	-1.02189	0.0124905	0.246598	1.47256	0.838787	2.43679	1.46506	0.498838	1.12069	0.57012	0.819099
ENSMUSG00000022221	Ripk3	-1.02666	0.0241307	0.350931	1.02352	0.805178	2.12725	0.599004	0.502043	0.343655	0.714837	0.639348
ENSMUSG00000034881	Tbxa2r	-1.02674	0.00896863	0.201429	0.770238	0.976662	1.10235	0.904979	0.353248	0.234476	0.699791	0.529704
ENSMUSG00000027996	Sfrp2	-1.03039	1.33179e-07	5.61239e-05	12.4269	14.0356	12.2509	13.6487	6.79944	4.49285	6.24732	7.61235
ENSMUSG00000007279	Scube2	-1.03174	0.00272926	0.0961381	0.645706	0.60685	0.799717	0.737327	0.327888	0.173255	0.358963	0.485588
ENSMUSG00000026317	Cln8	-1.03538	0.0192526	0.317155	2.3539	2.19517	9.06226	2.04248	1.68961	1.76355	2.18098	1.88356
ENSMUSG00000043099	Hic1	-1.03581	0.0073212	0.179806	3.63499	3.51717	3.61439	3.82872	1.8856	0.482513	2.60083	2.00055
ENSMUSG00000046410	Kcnk6	-1.03772	0.0346094	0.418004	1.53455	0.917833	4.98549	1.01507	0.920463	0.75746	1.33022	1.03952
ENSMUSG00000032322	Pstpip1	-1.03901	0.0321336	0.406325	3.47785	2.65658	11.9188	2.81892	2.53316	1.21578	3.4176	2.81809
ENSMUSG00000035228	Ccdc106	-1.03976	0.000799808	0.0407427	1.28117	1.15164	0.976208	1.1465	0.618236	0.315982	0.685852	0.551873
ENSMUSG00000042190	Cmklr1	-1.04414	0.0143228	0.267075	4.32861	3.55642	12.5882	2.8963	2.86532	1.93208	3.24055	3.09138
ENSMUSG00000002108	Nr1h3	-1.04469	0.0404875	0.451106	1.63818	2.12442	6.74051	1.58044	0.931371	0.821714	2.39858	1.62664
ENSMUSG00000034413	Neurl1b	-1.04664	0.000373902	0.0238085	1.60335	1.12506	1.96345	1.25697	0.527226	0.499349	1.03459	0.762509
ENSMUSG00000090958	Lrrc32	-1.04895	0.00502988	0.142651	1.62796	1.12633	3.06262	1.28545	0.861898	0.454777	0.933755	1.12376
ENSMUSG00000032014	Oaf	-1.05608	0.00544508	0.149211	2.50444	2.62008	3.68478	2.12907	1.65897	0.445328	1.78821	1.25459
ENSMUSG00000024621	Csf1r	-1.05674	0.0221285	0.336765	17.6452	16.3336	71.3346	14.336	14.3413	10.1459	17.3865	14.6656
ENSMUSG00000015745	Plekho1	-1.06133	0.00694648	0.174144	9.55283	9.97891	24.32	8.8485	5.71259	3.00012	8.37692	7.74136
ENSMUSG00000032436	Cmtm7	-1.06247	0.0146207	0.269897	2.92503	3.32688	9.4723	2.95118	2.73829	1.10789	2.79619	2.13649
ENSMUSG00000038151	Prdm1	-1.06824	0.0287943	0.386386	0.649339	0.654343	2.85405	0.689523	0.385088	0.564472	0.612605	0.724642
ENSMUSG00000046908	Ltb4r1	-1.07097	0.0381604	0.436997	0.678605	0.630228	0.94844	0.683184	0.176831	0.161391	0.656824	0.386046
ENSMUSG00000050721	Plekho2	-1.07282	0.0134295	0.257034	7.72144	6.54638	25.6879	7.19415	5.26371	3.22132	6.15731	7.4417
ENSMUSG00000028773	Fabp3	-1.07525	0.00390205	0.120911	1.50862	2.13497	2.1848	1.63367	0.973432	0.888437	0.815856	0.799194
ENSMUSG00000033033	Calhm2	-1.07545	0.00201331	0.0784279	1.62822	1.66498	3.72716	1.54278	1.16791	0.682866	0.994151	1.15091
ENSMUSG00000036390	Gadd45a	-1.07591	0.0185598	0.311543	3.04561	2.77761	10.4213	3.02322	2.82178	1.37968	2.39572	2.39568
ENSMUSG00000030208	Emp1	-1.07714	0.00499643	0.141921	12.0034	10.8849	33.3733	9.54534	6.62619	10.4143	7.08753	6.53197
ENSMUSG00000026389	Steap3	-1.07857	0.0073387	0.179806	2.06325	2.02119	5.87497	1.75948	1.60098	0.872352	1.71596	1.25199
ENSMUSG00000034220	Gpc1	-1.08608	0.00164473	0.0688664	5.60654	5.568	11.309	5.04405	3.85161	1.64317	4.07816	3.12144
ENSMUSG00000020695	Mrc2	-1.08811	0.00498669	0.141818	4.38707	4.43691	9.37237	3.86686	2.74365	1.0094	3.40228	3.02325
ENSMUSG00000036553	Sh3tc1	-1.09544	0.0195737	0.320396	1.80059	1.56075	5.41459	1.43673	1.37056	0.473309	1.541	1.30587
ENSMUSG00000021483	Cdk20	-1.10629	0.00602609	0.158687	0.775296	1.0667	2.363	0.761822	0.568669	0.437066	0.741147	0.522728
ENSMUSG00000005836	Gata6	-1.10632	2.53349e-05	0.00353743	1.18469	1.04522	1.32461	1.40316	0.520944	0.457848	0.649778	0.636507
ENSMUSG00000023191	P3h3	-1.1068	0.000657484	0.0355225	5.2989	4.3407	8.27639	4.17117	2.76158	1.27961	3.24036	2.76195
ENSMUSG00000004267	Eno2	-1.11973	0.00987328	0.21111	2.2634	1.55067	5.75207	1.54334	1.41111	0.784812	1.26668	1.56171
ENSMUSG00000041729	Coro2b	-1.12322	7.6259e-07	0.00022955	5.76495	4.64011	7.29549	7.13843	2.83376	2.08776	2.97595	3.3127
ENSMUSG00000067714	Lpar5	-1.12364	0.0167958	0.293896	1.45984	0.763248	3.15569	1.19112	0.803079	0.462921	0.962922	0.738201
ENSMUSG00000019055	Plod1	-1.12703	0.00191386	0.075828	7.40306	6.79043	17.9166	6.57705	3.70025	2.75939	5.66159	5.29786
ENSMUSG00000020057	Dram1	-1.13641	0.00805104	0.189545	1.66397	1.96135	5.19995	1.23737	0.900126	1.16217	1.47872	0.958583
ENSMUSG00000052384	Nrros	-1.14062	0.0137511	0.26021	3.3884	3.11103	14.0011	3.1323	2.68762	2.07557	3.17406	2.60775
ENSMUSG00000033453	Adamts15	-1.15002	0.00013251	0.0115463	2.82253	2.86523	5.12078	2.0129	1.28907	1.10061	1.80198	1.47267
ENSMUSG00000025854	Fam20c	-1.15285	0.00326687	0.10859	6.3947	5.99233	14.2507	3.78139	3.63564	1.83846	4.26621	3.65471
ENSMUSG00000018507	Trpv2	-1.15349	0.0154387	0.279019	2.25478	2.36128	7.93779	1.57183	1.51085	0.842677	2.14499	1.74285
ENSMUSG00000039787	Cercam	-1.15365	0.00104332	0.0500665	3.28827	4.20663	6.07739	3.09509	2.31522	0.870087	2.51808	1.62975
ENSMUSG00000074575	Kcng1	-1.15368	0.000877029	0.0437157	3.75938	5.08488	3.46617	4.31564	1.73318	0.756534	2.97069	1.85715
ENSMUSG00000059430	Actg2	-1.1546	3.34672e-06	0.000768022	212.41	292.758	255.935	202.777	133.977	66.6247	124.188	98.0572
ENSMUSG00000022102	Dok2	-1.15826	0.000847435	0.042423	2.66797	2.25141	5.06753	2.05983	0.961293	1.1907	1.46226	1.69889
ENSMUSG00000034041	Lyl1	-1.16038	0.0360066	0.425037	3.1861	2.538	8.90231	1.46277	2.39656	0.531202	2.54337	1.56129
ENSMUSG00000018459	Slc13a3	-1.1659	0.0337576	0.413957	0.301993	0.249301	0.345163	0.286147	0.262312	0.031921	0.138572	0.0848386
ENSMUSG00000032643	Fhl3	-1.16611	0.0111343	0.227776	1.38571	1.47831	3.05106	1.04366	0.55552	0.371811	0.807031	1.32956
ENSMUSG00000026958	Dpp7	-1.1663	0.0142033	0.265726	1.70492	1.12596	5.15353	1.15125	1.10301	0.652493	1.17347	1.07023
ENSMUSG00000037306	Man1c1	-1.16861	0.0217245	0.334127	2.98439	3.19243	13.2577	2.32877	2.32649	1.24061	3.36599	2.58707
ENSMUSG00000049130	C5ar1	-1.17201	0.0150464	0.275036	2.00182	2.16752	7.53715	1.52183	1.23737	0.885746	1.85045	1.81266
ENSMUSG00000031375	Bgn	-1.17205	4.9894e-05	0.00584063	80.3245	72.893	147.824	62.178	37.447	28.8397	43.9375	47.952
ENSMUSG00000017716	Birc5	-1.17647	0.00776555	0.186712	0.673873	0.562152	0.983464	0.520892	0.0924201	0.253051	0.347863	0.502171
ENSMUSG00000040280	Ndufa4l2	-1.17688	0.0201468	0.324593	0.892205	1.06061	2.34099	1.18354	0.371986	0.396091	0.552684	1.08279
ENSMUSG00000034845	Plvap	-1.18181	0.0128582	0.250838	3.39209	3.47819	8.96943	1.94537	1.95391	0.820887	3.01057	1.89584
ENSMUSG00000030401	Rtn2	-1.18965	0.000870134	0.0434655	0.743691	0.820438	0.816407	0.560532	0.264261	0.176871	0.314104	0.512815
ENSMUSG00000020654	Adcy3	-1.18998	0.00603619	0.158687	0.883539	0.979453	2.87899	1.20593	0.778407	0.310192	0.868755	0.606346
ENSMUSG00000034271	Jdp2	-1.19013	0.000779504	0.039972	2.51589	2.10066	4.17936	2.17955	1.27372	0.71802	0.96478	1.78111
ENSMUSG00000031558	Slit2	-1.19342	0.00159705	0.0674729	1.15754	1.31722	3.52036	1.04618	0.60017	0.880944	0.747689	0.804461
ENSMUSG00000035506	Slc12a8	-1.19464	0.0157501	0.280544	0.410839	0.277492	0.584642	0.176946	0.136254	0.142122	0.154241	0.188864
ENSMUSG00000079553	Kifc1	-1.19787	0.00234952	0.0863029	0.830245	0.697846	1.71032	1.09658	0.603145	0.311142	0.441572	0.508887
ENSMUSG00000022579	Gpihbp1	-1.2058	0.0443792	0.468374	0.608413	0.354535	1.79271	0.746044	0.522252	0.10214	0.406446	0.470536
ENSMUSG00000040249	Lrp1	-1.21317	0.00547874	0.149748	33.946	32.4554	105.173	29.7377	23.0683	9.45978	27.9005	24.8165
ENSMUSG00000020261	Slc36a1	-1.21599	0.00666949	0.169688	2.74053	2.73709	10.79	2.43709	2.1658	1.46382	2.12205	2.16959
ENSMUSG00000028931	Kcnab2	-1.22023	0.0317566	0.403761	1.29644	1.32908	6.67468	1.09985	0.848493	0.50193	1.69644	1.35688
ENSMUSG00000006457	Actn3	-1.22176	0.00567203	0.153942	2.6893	2.7251	0.77124	1.67285	1.06989	0.332001	1.05974	0.809714
ENSMUSG00000032816	Igdcc4	-1.22589	3.15822e-06	0.000737203	1.11536	1.04966	1.66279	0.942346	0.474715	0.389054	0.566171	0.573408
ENSMUSG00000010751	Tnfrsf22	-1.23215	0.000353396	0.0230085	0.425349	0.463497	0.418514	0.443333	0.221675	0.175344	0.175657	0.157731
ENSMUSG00000036098	Myrf	-1.23321	7.39624e-05	0.00755198	1.75057	1.31094	1.47265	1.30328	0.803719	0.267644	0.720786	0.632297
ENSMUSG00000022408	Fam83f	-1.23435	0.0336845	0.413957	1.34551	1.01928	6.97346	1.27491	0.721854	0.640002	1.69558	1.4008
ENSMUSG00000050211	Pla2g4e	-1.23654	0.000265309	0.0186344	1.58473	1.83151	1.00407	1.82691	0.399184	0.414581	0.845328	0.948267
ENSMUSG00000039873	Neurl2	-1.23825	0.00966804	0.209286	1.10784	2.13714	5.00686	2.4309	1.03317	0.66562	1.14376	1.65112
ENSMUSG00000031070	Mrgprf	-1.24089	0.000227296	0.0165204	1.86974	1.90834	2.2046	2.14743	0.856323	0.404252	1.34541	0.773572
ENSMUSG00000053158	Fes	-1.24569	0.0124279	0.24557	2.22905	2.68703	10.2935	1.88306	1.70755	1.02194	2.35679	2.00989
ENSMUSG00000058620	Adra2b	-1.24901	0.00809176	0.190214	0.279857	0.510693	0.197627	0.237259	0.107469	0.140122	0.106449	0.148964
ENSMUSG00000039476	Prrx2	-1.25273	4.94241e-05	0.00584063	2.83103	2.47934	2.31211	2.52698	1.19745	0.507414	1.2708	1.20335
ENSMUSG00000044551	9930012K11Rik	-1.26845	0.0444629	0.468469	0.476322	0.206437	0.852125	0.253872	0.279271	0.113283	0.245885	0.0903237
ENSMUSG00000063133	Klk1b1	-1.27619	0.00765649	0.184472	1.15928	0.810647	1.03696	1.22768	0.355396	0.518984	0.422428	0.413801
ENSMUSG00000045312	Lhfpl2	-1.27652	0.00207876	0.0801946	9.4913	7.90711	31.101	7.51157	5.07406	5.83405	5.50322	6.35348
ENSMUSG00000005220	Corin	-1.27683	0.00130894	0.0580087	0.243206	0.301158	0.435089	0.403278	0.114075	0.173524	0.163211	0.110685
ENSMUSG00000022438	Parvb	-1.27859	0.00567889	0.153948	1.26559	1.43947	4.8217	1.11036	0.912009	0.564827	1.04853	0.979716
ENSMUSG00000003363	Pld3	-1.28421	0.0435013	0.466146	36.5243	38.0942	160.796	36.3637	33.697	12.8553	32.1282	30.9774
ENSMUSG00000013483	Card14	-1.28879	0.00457306	0.134853	0.421708	0.320279	0.892733	0.492815	0.219778	0.0936077	0.304769	0.241679
ENSMUSG00000022044	Stmn4	-1.29123	0.0393459	0.443776	0.7385	0.43034	0.272002	0.329294	0.181119	0.123978	0.13455	0.263604
ENSMUSG00000056515	Rab31	-1.29681	0.00169677	0.0703539	5.10272	5.00433	18.029	4.88331	3.51033	3.44654	3.52969	2.71792
ENSMUSG00000031662	Snx20	-1.29721	0.0108195	0.224708	0.520807	0.574553	2.0434	0.403756	0.24675	0.360328	0.513257	0.299271
ENSMUSG00000043017	Ptgir	-1.30442	0.00151732	0.0648866	0.840788	0.584806	2.0802	0.932273	0.428863	0.374399	0.4802	0.488486
ENSMUSG00000048779	P2ry6	-1.30515	0.0215625	0.333482	2.3698	2.76895	12.2565	1.49697	2.02675	0.982696	2.57212	1.93579
ENSMUSG00000028664	Ephb2	-1.30626	9.49124e-05	0.00885944	0.894824	0.999255	1.82396	0.853009	0.474827	0.252798	0.599099	0.488139
ENSMUSG00000029771	Irf5	-1.315	0.00867459	0.196731	5.6195	5.09638	23.5752	4.3997	3.76739	2.25883	5.33869	3.92225
ENSMUSG00000045165	AI467606	-1.32604	0.0149032	0.273497	1.77493	1.1823	5.74837	1.15986	0.861229	0.582245	1.70611	0.711836
ENSMUSG00000035805	Mlc1	-1.32712	0.0460361	0.476137	0.232188	0.146371	0.188808	0.140003	0.0440027	0.0602409	0.0435851	0.128085
ENSMUSG00000047419	Cmya5	-1.33303	0.000183568	0.0145438	0.937993	0.593106	0.330252	0.359292	0.182017	0.294277	0.190592	0.186699
ENSMUSG00000038178	Slc43a2	-1.33568	0.0024671	0.0893477	5.73444	5.36919	21.7535	5.04151	3.94163	2.62922	4.16052	4.03371
ENSMUSG00000049988	Lrrc25	-1.33602	0.0414053	0.455997	1.62105	1.249	10.5126	1.49333	1.17338	0.599717	2.18501	1.86715
ENSMUSG00000028072	Ntrk1	-1.339	0.0115124	0.233043	0.342679	0.497884	0.980866	0.476223	0.0952484	0.130398	0.283033	0.392775
ENSMUSG00000051498	Tlr6	-1.34719	0.0360708	0.425037	0.369823	0.43007	2.18616	0.198062	0.335196	0.351817	0.348615	0.19514
ENSMUSG00000041930	Fam222a	-1.34822	0.0137381	0.26021	0.403573	0.259863	0.415138	0.248558	0.0841307	0.0383924	0.166664	0.224484
ENSMUSG00000040212	Emp3	-1.35878	0.00029886	0.0205548	25.9419	24.5782	62.2613	19.5074	14.306	7.81976	16.2724	12.1266
ENSMUSG00000043895	S1pr2	-1.3601	0.00471917	0.137284	1.61817	1.12668	5.70702	1.34051	1.18548	0.562977	1.07876	0.916459
ENSMUSG00000013367	Iglon5	-1.37201	0.0436893	0.467081	0.202941	0.245714	0.302546	0.277755	0.07051	0	0.209522	0.114024
ENSMUSG00000040310	Alx4	-1.38223	0.0321243	0.406325	0.209479	0.257319	0.119921	0.095274	0.0087338	0.0318849	0.147066	0.0677939
ENSMUSG00000003484	Cyp4f18	-1.38894	0.0341275	0.415445	1.18108	1.34207	7.79914	1.28368	0.977611	0.297417	1.93667	1.15935
ENSMUSG00000001493	Meox1	-1.39805	0.0338088	0.413957	0.212293	0.289166	0.996935	0.201153	0.110639	0.227201	0.164383	0.134188
ENSMUSG00000087006	Gm13889	-1.40235	0.00496566	0.141741	1.53567	0.971928	2.13677	0.889224	0.711408	0.121742	0.660615	0.560841
ENSMUSG00000034311	Kif4	-1.411	0.00148949	0.0640509	0.308491	0.423137	0.933952	0.427213	0.210242	0.259609	0.195997	0.107997
ENSMUSG00000021384	Susd3	-1.41463	0.0154449	0.279019	2.00136	0.784778	6.22835	1.30374	0.738813	0.515644	1.42056	1.13854
ENSMUSG00000035914	Cd276	-1.41864	0.00143427	0.0624877	1.09944	1.02411	3.30256	1.0262	0.718368	0.390264	0.796259	0.464679
ENSMUSG00000017300	Tnnc2	-1.42532	5.51125e-06	0.00114053	5.06773	4.76921	3.55085	3.28124	1.49662	1.52665	1.83123	1.19589
ENSMUSG00000045657	Pcdhb10	-1.43951	0.00574496	0.15493	0.394018	0.349238	0.50084	0.196496	0.0864619	0.197281	0.149872	0.0838923
ENSMUSG00000031461	Myom2	-1.44466	0.000552456	0.0313076	0.827146	0.403926	0.406407	0.342198	0.170002	0.0997446	0.156361	0.282771
ENSMUSG00000028626	Col9a2	-1.46263	0.0426481	0.461915	0.14154	0.120183	0.361731	0.172432	0.0210758	0.0769424	0.146131	0.0408989
ENSMUSG00000031803	B3gnt3	-1.47648	0.00333239	0.109713	0.561238	0.460118	1.47143	0.385088	0.282409	0.165697	0.219787	0.352307
ENSMUSG00000027611	Procr	-1.48995	0.0151326	0.276394	0.88244	1.45695	6.28174	0.836136	0.613191	0.629607	0.759215	1.33868
ENSMUSG00000029082	Bst1	-1.49478	0.0290964	0.387181	0.372627	0.164059	2.27761	0.41192	0.280509	0.196936	0.320593	0.334982
ENSMUSG00000043421	Hilpda	-1.50891	0.00419584	0.127292	2.58891	2.86285	13.9483	3.19469	2.3847	1.8901	1.42967	2.13116
ENSMUSG00000032363	Adamts7	-1.51173	0.00846247	0.194201	0.395695	0.348432	1.19947	0.395762	0.160394	0.0418255	0.351788	0.255674
ENSMUSG00000020635	Fkbp1b	-1.53105	0.00708035	0.176246	1.75674	1.44023	5.09343	0.746183	0.757693	0.461024	1.00067	0.857705
ENSMUSG00000068220	Lgals1	-1.5401	0.000450388	0.0273111	40.7213	38.9485	142.988	36.0636	20.7217	13.7097	30.1389	22.8713
ENSMUSG00000030657	Xylt1	-1.55144	0.000614081	0.0339694	0.852112	0.850617	3.37127	0.794978	0.437256	0.455197	0.595521	0.483922
ENSMUSG00000055177	Cstl1	-1.55323	0.0266398	0.369895	0.796574	0.964463	0.633353	0.587048	0.46127	0.0841989	0.274136	0.179025
ENSMUSG00000021464	Ror2	-1.56063	0.000467985	0.0281089	0.489605	0.529107	1.3271	0.393624	0.231966	0.197598	0.245083	0.240077
ENSMUSG00000044461	Shisa2	-1.57046	0.0157142	0.280173	0.360162	0.187782	0.152602	0.179612	0.0790327	0.018033	0.058712	0.134197
ENSMUSG00000048981	Krt31	-1.57082	0.00535868	0.148115	0.673133	0.444548	0.434855	0.53151	0.233874	0.071151	0.270263	0.113462
ENSMUSG00000029819	Npy	-1.58637	1.03077e-07	4.58042e-05	134.647	72.3319	165.382	156.681	35.8213	29.613	51.6583	56.2024
ENSMUSG00000026308	Klhl30	-1.5956	0.0431866	0.464492	0.17226	0.0948029	0.119843	0.0906784	0.0399001	0.0364162	0.0197607	0.0580715
ENSMUSG00000031302	Nlgn3	-1.6232	0.00590382	0.15783	0.0899901	0.082289	0.111454	0.0655908	0.00721528	0.0263411	0.035734	0.0420051
ENSMUSG00000000204	Slfn4	-1.62405	0.0464576	0.47731	0.0746886	0.118381	0.734885	0.141539	0.0311398	0.0426313	0.0771107	0.196393
ENSMUSG00000059022	Kcp	-1.62491	0.00113346	0.052682	0.447813	0.383667	1.0393	0.332572	0.189229	0.057569	0.22492	0.232567
ENSMUSG00000050967	Creg2	-1.63042	0.0474578	0.480768	0.0970669	0.0480785	0.538314	0.0735789	0.020235	0.0461705	0.0400859	0.137435
ENSMUSG00000031465	Angpt2	-1.64705	0.014741	0.271464	0.282331	0.230328	1.32213	0.12589	0.138485	0.189589	0.154317	0.134369
ENSMUSG00000030672	Mylpf	-1.67656	0.00733405	0.179806	8.79905	5.42874	0.759445	1.38956	1.44812	0.881121	1.03594	1.56121
ENSMUSG00000049538	Adamts16	-1.68303	0.00110577	0.0516724	0.358956	0.298237	0.983955	0.230404	0.108623	0.110154	0.20323	0.152238
ENSMUSG00000030592	Ryr1	-1.68856	0.0110301	0.227047	0.589002	0.366105	0.0585392	0.0510676	0.0682144	0.0622583	0.13116	0.0545071
ENSMUSG00000043613	Mmp3	-1.71743	0.00744832	0.181092	0.689391	0.292683	2.0555	0.373267	0.171088	0.312298	0.305035	0.232404
ENSMUSG00000029161	Cgref1	-1.71947	0.0058172	0.156417	0.369009	0.324933	1.13692	0.776992	0.128209	0.234029	0.296315	0.124399
ENSMUSG00000047976	Kcna1	-1.72386	3.18062e-06	0.000737203	3.16811	3.26918	6.7697	2.34869	0.794973	1.11625	1.802	0.90485
ENSMUSG00000080115	Eef1akmt3	-1.73783	0.0149183	0.273557	0.217446	0.150785	0.252852	0.123621	0.0226649	0.0413717	0.0673492	0.0879651
ENSMUSG00000025475	Adgra1	-1.78451	0.000256696	0.0182506	0.658584	0.455456	0.188954	0.435641	0.0777121	0.0709267	0.205266	0.138238
ENSMUSG00000048965	Mrgpre	-1.78845	0.0263456	0.367066	0.0943209	0.0934367	1.25147	0.238324	0.147469	0.0448643	0.1623	0.127188
ENSMUSG00000003555	Cyp17a1	-1.79846	2.08665e-07	7.80071e-05	4.23474	1.71029	3.05946	2.19146	0.984653	0.5578	0.706258	0.889501
ENSMUSG00000055882	Abhd16b	-1.81438	0.0320398	0.405934	0.33309	0.296971	0.357532	0.220928	0.104156	0	0	0.235808
ENSMUSG00000049985	Ankrd55	-1.82738	0.0180929	0.307827	0.184243	0.164264	0.840491	0.0872875	0.0576121	0.0701089	0.171196	0.0558999
ENSMUSG00000051747	Ttn	-1.82773	0.0191471	0.316653	3.48462	2.45354	0.239117	0.490861	0.403823	0.494928	0.438276	0.470746
ENSMUSG00000030606	Hapln3	-1.85746	0.0424926	0.461565	0.140854	0.0872085	0.283481	0.0166829	0.0367038	0.0167495	0.0545332	0.035613
ENSMUSG00000001444	Tbx21	-1.87358	0.0229543	0.342716	0.190108	0.141244	0.573913	0.157616	0.0495384	0.0226065	0.0245341	0.192264
ENSMUSG00000074361	C5ar2	-1.89303	0.00220493	0.0831169	0.586234	0.239128	2.3597	0.506461	0.251607	0.147624	0.302623	0.279005
ENSMUSG00000018822	Sfrp5	-1.89462	0.00570236	0.154403	0.373411	0.585692	1.83706	0.294848	0.194608	0.0592051	0.224887	0.346177
ENSMUSG00000057967	Fgf18	-1.89683	0.000298437	0.0205548	0.70774	0.97076	1.46091	1.0317	0.397219	0.207163	0.337242	0.165178
ENSMUSG00000111915	Gm3285	-1.93087	0.0206394	0.327354	0.781367	0.774042	0.116487	0.925459	0.203609	0	0.268903	0.197558
ENSMUSG00000058794	Nfe2	-1.93195	0.0155344	0.279376	0.188893	0.155935	0.309763	0.328132	0.0656291	0.0898481	0.0975094	0
ENSMUSG00000026407	Cacna1s	-1.97284	0.0102555	0.216683	0.32158	0.243609	0.0253807	0.0716956	0.0197171	0.0269932	0.0683548	0.0478278
ENSMUSG00000015843	Rxrg	-1.99173	0.0181818	0.308957	0.280206	0.444127	0.150384	0.0531006	0.058413	0.0533127	0.0578586	0.056677
ENSMUSG00000030108	Slc6a13	-2.00831	0.0237973	0.348435	0.291118	0.314606	0.118364	0.0501532	0.0551707	0.0755303	0.0273236	0.0267656
ENSMUSG00000028175	Depdc1a	-2.03617	0.0323128	0.407096	0.0711688	0.0705016	0.127319	0.101152	0.0185452	0.0338519	0	0.0359881
ENSMUSG00000038670	Mybpc2	-2.03841	0.00683429	0.172367	0.704046	1.02184	0.102519	0.0775701	0.170661	0.0934559	0.0676166	0.115912
ENSMUSG00000028778	Hcrtr1	-2.04344	0.0116252	0.234711	0.121204	0.120068	0.195148	0.275627	0.0252668	0.0461213	0.050054	0.0490318
ENSMUSG00000021506	Pitx1	-2.05644	0.0490124	0.487756	0.144733	0.11948	0.0647307	0.0914258	0.0502862	0	0.0249045	0.0243959
ENSMUSG00000066938	Gm10190	-2.08765	0.00519543	0.145084	3.28464	2.35	1.63225	1.72905	0.570609	0	1.31878	0.18455
ENSMUSG00000043557	Mdga1	-2.09553	0.00621312	0.161965	0.0709	0.0842824	0.33612	0.0403078	0.0369503	0.0067448	0.0365996	0.0430226
ENSMUSG00000028332	Hemgn	-2.1216	0.0484517	0.485136	0.150123	0.0495719	0.179044	0.0711229	0.0260794	0	0.0258319	0.0506088
ENSMUSG00000102418	Sh2d1b1	-2.21431	0.0108489	0.224822	0.278884	0.09209	1.87093	0.220209	0.145344	0.0663265	0.263935	0.0470081
ENSMUSG00000027468	Defb22	-2.23165	5.99504e-07	0.000187774	4.70728	3.26421	5.22113	3.83584	1.86447	0.537371	0.485994	0.666497
ENSMUSG00000019874	Fabp7	-2.24078	0.0264919	0.368714	0.4703	0.199668	0.781256	0.190981	0.210088	0.0639146	0	0.067948
ENSMUSG00000021702	Thbs4	-2.25039	0.000733346	0.0382845	0.203364	0.293029	1.10797	0.350351	0.0578103	0.0879376	0.0572616	0.205671
ENSMUSG00000038763	Alpk3	-2.34852	0.000671033	0.0360068	0.222792	0.165528	0.0747315	0.0791632	0.00967589	0.0176621	0.0479203	0.028165
ENSMUSG00000030427	Lilra6	-2.359	0.00361829	0.115357	0.233774	0.14737	0.64633	0.221507	0.0886064	0.0202174	0.131648	0
ENSMUSG00000078137	Ankrd63	-2.37036	0.0429406	0.463567	0.0486513	0.0240976	0.0870356	0.0345738	0.0126776	0	0.0125573	0.0123008
ENSMUSG00000025496	Drd4	-2.38501	0.00474024	0.137611	0.105615	0.251101	0.13226	0.30022	0	0.0401893	0.0872324	0.0213627
ENSMUSG00000031097	Tnni2	-2.4329	7.36073e-05	0.00754899	1.65149	1.30881	1.77268	0.438154	0.275422	0.18853	0.204606	0.267237
ENSMUSG00000079588	Tmem182	-2.43697	0.00607766	0.159173	0.348297	0.172516	0.214188	0.103132	0	0.103544	0	0.0440311
ENSMUSG00000046006	Gapt	-2.45258	0.02164	0.333707	0.142879	0.056616	0.664577	0.0812293	0.0297853	0.0543691	0	0.0867002
ENSMUSG00000053687	Dpep2	-2.51198	0.0262607	0.367066	0.0201374	0.0797946	0.558391	0.0381615	0.0209897	0.019157	0.0207905	0.0610977
ENSMUSG00000095562	Gm21887	-2.54734	0.00113959	0.0528233	1.00209	0.772099	1.09555	1.79352	0.348168	0.211845	0	0.225214
ENSMUSG00000052374	Actn2	-2.57179	0.00432189	0.129255	1.53058	0.466532	0.0351046	0.0929657	0.12272	0.0560022	0.101296	0.0595363
ENSMUSG00000020826	Nos2	-2.58768	0.00975354	0.2101	0.0564155	0.0558867	0.365855	0.0400915	0.0147008	0.0134172	0.0291226	0.0285278
ENSMUSG00000071068	Treml2	-2.66059	0.0327832	0.409848	0.0786739	0.0259788	1.70067	0.17394	0.109338	0.0374217	0.121838	0.0397833
ENSMUSG00000035930	Chst4	-2.75798	0.00022518	0.0165204	0.275505	0.655015	0.271079	0.339364	0.0574331	0	0.056888	0.111452
ENSMUSG00000061877	BC048679	-2.7635	5.12895e-09	3.71496e-06	5.72759	2.83695	2.97478	2.71352	0.481451	0.703061	0.286129	0.560571
ENSMUSG00000066652	Lefty2	-2.78767	0.0421648	1	0.119538	0.0473669	0.0855398	0.0906124	0.0498388	0	0	0
ENSMUSG00000070298	Trcg1	-2.79063	0.0431628	1	0.0656684	0.0216843	0.137059	0.0829635	0	0.0208237	0	0.0221378
ENSMUSG00000061462	Obscn	-2.88089	7.88949e-05	0.00792251	0.300814	0.19624	0.0415642	0.0254905	0.0050983	0.0116329	0.0227246	0.0346275
ENSMUSG00000032013	Trim29	-2.89025	0.000423765	0.0260169	0.32426	0.128488	1.81762	0.307246	0.0675968	0.143954	0.0223184	0.109313
ENSMUSG00000061723	Tnnt3	-3.01753	2.43852e-05	0.00344688	3.50686	4.55961	0.882234	0.415356	0.342682	0.104254	0.396002	0.277082
ENSMUSG00000026204	Ptprn	-3.03111	0.0460014	0.475992	0.0332715	0	0.178565	0.0630514	0	0.0158258	0.0171753	0
ENSMUSG00000085584	Rtl9	-3.17967	0.0331546	1	0.0432189	0.0285425	0.0773173	0.0136504	0	0	0.0148735	0
ENSMUSG00000026564	Dusp27	-3.20278	0.0302844	0.39366	0.175397	0.0434382	0.0653708	0	0	0	0.0150904	0.0147823
ENSMUSG00000030785	Cox6a2	-3.21857	0.0288485	0.386503	1.04336	0.344525	0.311088	0	0	0.0827131	0.089766	0
ENSMUSG00000062077	Trim54	-3.33238	0.0385341	1	0.288608	0.12253	0	0.117199	0	0	0	0.0416975
ENSMUSG00000023210	Lcn9	-3.3958	0.00277012	0.0971344	0.140938	0.349042	0.5673	1.20188	0.0734514	0.067038	0.0727543	0
ENSMUSG00000026220	Slc16a14	-3.51481	0.0132166	1	0.0184358	0.0730517	0.098943	0.0698736	0	0	0.0190336	0
ENSMUSG00000097405	D630044L22Rik	-3.52879	0.0125638	1	0.13963	0.0790408	0.0356849	0.037801	0.0207914	0	0	0
ENSMUSG00000009654	Oit3	-3.57991	1.88068e-05	0.00279426	0.348169	0.323349	2.12163	0.144331	0.0680446	0.0414022	0.0673988	0.0660224
ENSMUSG00000021803	Cdhr1	-3.66233	0.0156331	1	0.0272962	0.0135201	0.146496	0.0258639	0.0142257	0	0	0
ENSMUSG00000037974	Muc5ac	-3.76531	0.0252982	1	0.00549883	0.0108946	0.0344303	0.0052103	0	0	0	0
ENSMUSG00000037613	Tnfrsf23	-3.89519	1.19341e-06	0.000333264	0.193963	0.419225	2.05042	0.30074	0.0735171	0.033549	0.0546146	0.0356661
ENSMUSG00000085007	Gm11549	-4.02547	0.0188097	1	0	0.0828126	0.112163	0.0594073	0	0	0	0
ENSMUSG00000043787	Defb12	-4.10689	0.0479456	1	0	0	0.474541	0.279268	0	0	0	0
ENSMUSG00000035448	Ccr3	-4.15789	0.00108709	0.0509021	0.0722781	0.0537004	0.339421	0.188335	0.0188343	0.0171898	0	0
ENSMUSG00000022245	Skor1	-4.16324	0.00700755	1	0.0323344	0.0640626	0.0144613	0.107232	0	0	0	0
ENSMUSG00000026937	Lcn5	-4.37593	0.0108375	0.224822	0.33979	0.168302	9.11811	4.50745	0.0885427	0	0	0.601379
ENSMUSG00000030730	Atp2a1	-4.78152	0.000188478	0.0147089	4.098	3.689	0.0760498	0.0805596	0.0886191	0.0323525	0.0702225	0.0859854
ENSMUSG00000013936	Myl2	-4.84561	0.000544221	0.0310829	0.864573	1.31764	0.178465	0.0630159	0.0693203	0	0	0
ENSMUSG00000024245	Tmem178	-4.9126	0.00127005	0.0570489	0.104582	0.0345337	1.09138	0.0660627	0	0.0331633	0	0
ENSMUSG00000068697	Myoz1	-5.12638	0.000207332	0.0156057	0.779751	1.04507	0.164112	0.0434609	0	0	0	0.0463881
ENSMUSG00000028751	Pla2g2e	-5.15799	0.000392361	0.0246454	0.623081	0	1.91971	0.524788	0	0	0.0714764	0
ENSMUSG00000015854	Cd5l	-5.17359	0.000157327	0.0130233	0.667898	0.201368	5.29889	0.412729	0.121072	0.0276252	0.0299808	0
ENSMUSG00000027470	Mylk2	-5.44096	5.24477e-05	0.00604792	0.260456	0.297709	0.0537631	0.0569513	0	0	0	0
ENSMUSG00000053093	Myh7	-7.12604	0.00467924	0.136939	1.14831	0.545267	0	0.00899216	0	0	0.00979789	0
ENSMUSG00000027022	Xirp2	-7.81606	0.0135176	0.257658	0.715661	0.151569	0	0.00467661	0	0	0	0
ENSMUSG00000016349	Eef1a2	-8.05906	6.55114e-05	0.0070709	1.07807	0.562085	4.06027	0.0268815	0	0	0	0

## Sheet: Dd
Gene ID	Gene name	log2FC	Pvalue	FDR	3M-Dd1	3M-Dd2	3M-Dd3	3M-Dd4	21M-Dd1	21M-Dd2	21M-Dd3	21M-Dd4
ENSMUSG00000033184	Tmed7	-0.58523	1.43e-15	3.01e-13	13.6705	14.1764	13.7348	14.3044	9.26407	8.96171	8.71221	8.84483
ENSMUSG00000048307	Ankrd46	-0.585548	3.53e-11	2.99e-09	13.7011	13.444	13.506	13.6027	8.47411	9.72635	8.88435	7.66516
ENSMUSG00000034473	Sec22a	-0.585722	7.19e-08	2.26e-06	8.28714	8.12562	9.01266	9.46649	5.29716	5.21748	6.1016	5.68989
ENSMUSG00000030629	Zfand6	-0.587312	8.77e-11	6.66e-09	27.9884	29.374	26.6246	27.0681	17.8902	18.6178	18.6082	15.9352
ENSMUSG00000046909	Tefm	-0.587568	0.0210324	0.0763901	2.191	4.13006	3.50165	3.31834	2.37269	2.04113	2.00034	1.97876
ENSMUSG00000038836	Agbl3	-0.588474	1.04e-05	0.000161088	5.37017	4.89256	4.69067	4.55836	3.15395	2.8982	3.61396	2.78396
ENSMUSG00000019877	Serinc1	-0.58868	5.59e-08	1.83e-06	93.0068	92.6852	91.7428	88.7271	65.4396	65.9526	55.2908	47.6668
ENSMUSG00000030452	Nipa2	-0.588768	3.12e-09	1.45e-07	10.8586	11.2487	11.6141	11.1932	7.77832	6.65252	6.85735	7.3776
ENSMUSG00000042155	Klhl23	-0.590017	1.43e-06	2.96e-05	13.2038	12.051	13.5045	14.5556	9.24605	9.18022	9.00813	6.60269
ENSMUSG00000020123	Avpr1a	-0.590068	0.0291808	0.0977342	1.24903	2.19355	1.57562	1.48741	0.940494	1.04617	0.821042	1.34323
ENSMUSG00000044408	Sptssa	-0.59188	1.92e-05	0.00026994	36.4213	39.4959	40.1649	38.2183	20.7181	22.7375	24.068	30.6418
ENSMUSG00000021815	Mss51	-0.594731	0.00913615	0.0406761	2.22814	2.13829	1.89126	2.20889	1.55615	1.39671	1.20054	1.23665
ENSMUSG00000041828	Abca8a	-0.594948	0.000180464	0.0017433	14.6002	16.8508	12.1803	13.6497	9.07908	11.7254	8.63721	7.21006
ENSMUSG00000028412	Slc44a1	-0.595631	8.08e-18	2.45e-15	23.9121	24.195	24.1444	22.8981	15.1708	16.0608	14.7024	14.5653
ENSMUSG00000037762	Slc16a9	-0.596313	2.97e-05	0.000385408	5.86006	6.05732	6.70359	6.57536	4.38084	4.09027	4.52327	3.00602
ENSMUSG00000035954	Dock4	-0.596508	0.000985647	0.00696172	2.82328	2.52865	2.77532	2.83708	2.1404	2.17276	1.45257	1.21927
ENSMUSG00000018995	Nars2	-0.596595	1.68e-08	6.45e-07	5.75532	5.5848	5.83357	6.04433	3.51575	3.77714	3.64268	3.81475
ENSMUSG00000022505	Emp2	-0.597124	0.000851123	0.00616079	24.2556	25.4946	24.7143	26.5348	18.4607	21.571	13.471	10.9662
ENSMUSG00000060002	Chpt1	-0.59767	0.000635871	0.00485569	26.4022	21.7864	23.0604	21.7434	17.0946	16.3828	16.291	9.36889
ENSMUSG00000042208	0610010F05Rik	-0.598315	2.91e-08	1.04e-06	7.45646	7.04366	7.30546	6.93716	4.96518	4.56256	4.76947	3.93169
ENSMUSG00000029322	Plac8	-0.598399	0.00239767	0.014211	334.853	299.55	395.206	376.171	294.562	269.039	186.264	143.194
ENSMUSG00000036834	Plch1	-0.599445	4.04e-08	1.39e-06	11.6112	13.5294	11.0648	13.6876	7.70621	8.63645	7.66744	7.68433
ENSMUSG00000031767	Nudt7	-0.599667	0.000272192	0.00243796	2.91793	2.60674	2.7115	2.32939	1.80919	1.47396	1.70152	1.70584
ENSMUSG00000026342	Slc35f5	-0.599941	2.46e-12	2.7e-10	20.6708	19.589	22.2854	20.707	12.67	15.0198	12.9898	12.102
ENSMUSG00000006373	Pgrmc1	-0.600243	2.33e-08	8.56e-07	552.046	564.829	602.877	559.846	359.412	338.639	427.635	316.912
ENSMUSG00000025597	Klhl4	-0.600576	0.0100169	0.0436571	1.04216	1.21513	1.349	0.900322	0.682209	0.728547	0.67962	0.759773
ENSMUSG00000046589	Lrrc8e	-0.600792	9.71e-05	0.0010418	8.42756	7.10594	8.45185	7.5686	4.58382	6.84275	4.49089	4.12741
ENSMUSG00000032673	Prorsd1	-0.600846	0.000241633	0.00221809	5.39609	4.80329	4.57781	5.25378	3.32586	3.05617	2.66375	3.65503
ENSMUSG00000022656	Nectin3	-0.600908	0.000230488	0.00212901	1.7633	1.62265	1.63242	1.81748	1.08735	1.27229	1.20906	0.764985
ENSMUSG00000039883	Lrrc17	-0.600995	0.0488268	0.144083	2.75587	2.50986	2.36118	2.56393	2.27023	2.14252	1.3287	0.740003
ENSMUSG00000039099	Wdr93	-0.601004	0.0344917	0.110838	1.16758	1.34729	1.26404	1.14058	0.520559	0.956695	0.959379	0.668513
ENSMUSG00000073791	Efcab7	-0.602695	0.0420774	0.129303	2.64768	1.79717	1.97936	1.41276	1.1573	1.09891	1.0309	1.66717
ENSMUSG00000000561	Wdr77	-0.602806	3.8e-08	1.32e-06	6.02244	5.71122	6.43134	6.50065	3.93162	3.64115	4.23388	3.78099
ENSMUSG00000071547	Nt5dc2	-0.602831	0.046649	0.139318	1.25642	1.61651	1.21659	1.53629	0.818023	1.30729	0.688252	0.750657
ENSMUSG00000020142	Slc1a4	-0.603236	0.00171094	0.0108543	3.21089	2.23769	3.55052	3.54046	1.63269	2.27365	1.70615	2.3176
ENSMUSG00000027822	Slc33a1	-0.603605	1.3e-05	0.000195315	20.327	24.3615	19.0363	23.6195	13.3003	17.099	13.3773	11.6807
ENSMUSG00000031200	Mtcp1	-0.604382	1.49e-06	3.06e-05	5.86405	5.64801	5.684	5.09194	3.37834	3.55918	3.31139	3.82791
ENSMUSG00000025608	Podxl	-0.60447	0.00879368	0.039414	12.5361	11.2511	11.8599	11.3862	8.20651	10.623	7.26787	3.80292
ENSMUSG00000026879	Gsn	-0.605189	0.000162423	0.00159977	668.49	683.14	626.359	665.133	456.92	565.235	326.091	330.574
ENSMUSG00000074748	Atxn7l3b	-0.605473	1.06e-13	1.61e-11	40.1573	37.9224	42.1357	43.799	26.3142	29.2209	23.9068	24.1933
ENSMUSG00000037455	Slc18b1	-0.605482	0.00350815	0.0193235	7.34313	5.99532	6.9791	7.09363	4.32334	6.25818	4.09101	2.70987
ENSMUSG00000040093	Bmf	-0.606493	7.89e-07	1.77e-05	7.83078	7.81278	9.48204	7.71317	4.38459	5.99125	5.6014	4.73577
ENSMUSG00000040605	Bace2	-0.607534	0.00161633	0.0103796	3.21351	4.3814	4.0336	3.91983	2.494	3.18571	2.47748	1.67105
ENSMUSG00000062797	Hikeshi	-0.607564	0.000168761	0.00165187	10.5078	10.676	12.9339	13.5886	8.2505	9.42304	6.81129	5.65014
ENSMUSG00000046152	Fut10	-0.607564	0.00561127	0.0277323	5.01134	5.0881	4.18361	5.62998	4.02825	3.99429	2.5207	2.07136
ENSMUSG00000049904	Tmem17	-0.607832	0.0305471	0.101205	2.42461	2.72956	1.88209	2.09745	1.72791	1.08435	1.78643	1.14363
ENSMUSG00000073678	Pgap1	-0.608264	1.02e-05	0.000158508	28.3292	25.9182	26.7819	28.3088	15.0797	14.2126	19.3102	20.0696
ENSMUSG00000026667	Uhmk1	-0.609337	6.28e-19	2.28e-16	23.2477	22.8965	23.0032	23.5145	14.9995	15.1268	13.4967	14.7374
ENSMUSG00000062963	Ufc1	-0.610156	1.39e-08	5.45e-07	23.9827	27.3572	26.7334	28.3068	14.698	18.9376	17.3568	15.9999
ENSMUSG00000032878	Ccdc85a	-0.610308	0.00549195	0.0272853	1.9404	1.41021	1.95387	1.74813	1.25326	1.4647	1.03153	0.697049
ENSMUSG00000027698	Nceh1	-0.611134	0.00209472	0.0127812	10.4216	11.3468	9.895	11.2332	7.30148	8.55281	7.33989	3.91376
ENSMUSG00000044968	Napepld	-0.611343	5.27e-05	0.000624123	5.4654	5.18429	4.82754	5.25739	2.60718	4.05438	3.55754	2.83869
ENSMUSG00000026691	Fmo3	-0.611733	3.37e-05	0.00042688	7.53043	8.00045	9.05327	8.34045	6.33044	5.37193	4.52389	4.47962
ENSMUSG00000019810	Fuca2	-0.611949	3.46e-10	2.19e-08	11.4668	13.4191	11.8667	12.6354	7.76962	7.53095	7.97635	7.76253
ENSMUSG00000073639	Rab18	-0.612536	3.47e-09	1.6e-07	43.5001	40.4544	38.6698	42.3676	28.5175	24.5908	27.3038	23.2174
ENSMUSG00000022853	Ehhadh	-0.61261	0.000416388	0.0034567	39.736	31.9952	32.9761	38.2434	18.1956	17.867	28.1266	25.3074
ENSMUSG00000034648	Lrrn1	-0.613519	0.0284358	0.0958369	2.12713	3.00347	2.57947	2.34795	1.67884	2.11712	1.82682	0.718003
ENSMUSG00000063558	Aox1	-0.613666	4.23e-06	7.45e-05	8.90138	9.13328	9.29785	9.06326	5.35523	6.6778	6.53551	4.31818
ENSMUSG00000041523	Upk2	-0.613749	0.00238584	0.0141586	9.29955	15.0451	12.3492	16.9027	7.44415	9.98042	8.26538	8.03361
ENSMUSG00000025221	Kcnip2	-0.61394	0.0130599	0.0533396	2.48458	2.6765	1.69375	2.57059	1.37936	1.83302	1.75994	0.959759
ENSMUSG00000051497	Kcnj16	-0.614349	1.51e-05	0.000219731	142.353	147.922	136.251	131.064	103.667	93.5383	89.8848	63.5441
ENSMUSG00000066324	Impad1	-0.615076	5.18e-12	5.3e-10	15.7596	15.1023	15.1432	15.4113	10.3723	9.92106	9.90236	8.33363
ENSMUSG00000021416	Eci3	-0.615397	0.00618969	0.0299456	40.009	48.274	43.6778	41.1383	31.9863	34.4867	28.5709	14.0522
ENSMUSG00000066152	Slc31a2	-0.61615	8.68e-11	6.63e-09	50.3168	45.3821	54.4753	52.029	29.3375	30.0615	34.2277	32.8427
ENSMUSG00000057522	Spop	-0.61747	1.63e-10	1.14e-08	54.591	52.4357	52.5401	56.1981	37.4961	37.1716	31.272	29.3372
ENSMUSG00000079144	A130010J15Rik	-0.617864	6.37e-06	0.000105947	4.64232	4.6125	4.65171	5.00612	3.10113	3.61812	2.6008	2.53894
ENSMUSG00000075033	Nxpe3	-0.618126	0.00461125	0.0238531	22.7168	18.0185	25.1452	20.3819	9.39331	9.95376	15.9669	18.2823
ENSMUSG00000040877	Wdr25	-0.61953	0.00316827	0.0178085	37.7589	35.4576	50.0329	37.736	18.1893	22.6668	37.6743	21.7115
ENSMUSG00000026103	Gls	-0.620241	1.2e-11	1.13e-09	17.5446	16.8798	17.2122	15.4134	10.6988	11.9147	9.61941	9.72018
ENSMUSG00000070709	Zfp974	-0.62137	1.56e-07	4.48e-06	4.4612	4.48366	4.33369	4.52344	2.45982	2.71949	3.0931	2.83276
ENSMUSG00000079508	Apoo	-0.622214	0.000259473	0.00235259	6.84505	5.85652	6.54705	6.674	4.1776	4.73624	3.9996	3.27169
ENSMUSG00000047728	BC025446	-0.624051	0.0412493	0.127405	1.86029	1.43022	3.0327	1.94179	0.944029	1.48711	1.49128	1.21987
ENSMUSG00000079317	Trappc2	-0.625399	0.000358294	0.00305618	3.15731	2.85622	3.13153	3.04232	2.03888	2.23286	1.75012	1.57196
ENSMUSG00000040612	Ildr2	-0.626059	0.000192499	0.00183785	4.42984	4.46826	5.00735	4.04611	2.675	3.91528	2.50926	2.11698
ENSMUSG00000039899	Fgl2	-0.626611	3.39e-09	1.57e-07	23.4887	21.3089	23.2892	23.147	14.5841	14.8122	11.719	15.6395
ENSMUSG00000012422	Tmem167	-0.627025	5.95e-09	2.57e-07	7.03904	6.79229	6.66992	6.88445	4.87497	3.86467	4.09977	4.18105
ENSMUSG00000026196	Bard1	-0.62711	0.0147855	0.0586132	0.459662	0.663428	0.754498	0.800471	0.455416	0.461409	0.39814	0.352087
ENSMUSG00000022144	Gdnf	-0.628171	0.0447655	0.135207	0.58924	1.00572	0.805227	0.848829	0.659126	0.553763	0.503256	0.302834
ENSMUSG00000063428	Ddo	-0.629099	0.022114	0.0792461	2.78176	2.07169	2.09501	2.48849	1.84445	1.9871	1.30892	0.74576
ENSMUSG00000038368	Focad	-0.629324	9.49e-05	0.00102311	5.20174	3.63647	4.98082	5.13999	3.53144	3.06255	2.87792	2.29592
ENSMUSG00000026315	Serpinb8	-0.631046	0.0141251	0.0565649	1.44141	1.21293	1.17876	1.00238	0.90879	1.00742	0.598172	0.492932
ENSMUSG00000114797	Nupl1	-0.631278	9.14e-08	2.78e-06	9.48245	7.97995	8.57426	7.76439	5.76412	4.76096	5.01853	5.39366
ENSMUSG00000039601	Rcan2	-0.631823	0.0108124	0.0461538	2.65761	3.19281	2.78194	2.2511	2.16147	2.23899	1.26749	1.10593
ENSMUSG00000070493	Chchd2	-0.632181	5.59e-09	2.43e-07	42.9073	39.485	42.7298	47.0571	25.0083	32.7831	25.4877	23.6578
ENSMUSG00000052459	Atp6v1a	-0.63243	6.86e-07	1.58e-05	30.8443	34.901	35.5028	32.4774	22.3967	23.1048	21.9327	15.5607
ENSMUSG00000044712	Slc38a6	-0.632549	6.94e-07	1.6e-05	7.89779	7.38057	7.37104	7.41096	3.95449	5.13375	5.42727	4.10973
ENSMUSG00000041695	Kcnj2	-0.63322	0.00040789	0.00339822	19.1494	16.9511	17.5659	18.4084	11.6044	13.6416	12.6956	6.84404
ENSMUSG00000052395	Rft1	-0.633245	2.96e-09	1.39e-07	13.7476	12.4253	13.7312	13.596	7.11482	8.5476	8.8522	8.59754
ENSMUSG00000032652	Crebl2	-0.633481	3.62e-06	6.52e-05	18.949	20.1942	17.6483	19.1682	11.0713	14.5241	12.5345	9.07743
ENSMUSG00000025903	Lypla1	-0.640646	1.63e-07	4.65e-06	7.88822	5.99885	6.94689	7.32492	4.34516	4.7287	3.75804	4.53103
ENSMUSG00000047797	Gjb1	-0.640951	3.3e-05	0.00042007	43.3012	52.8213	44.8046	52.1871	26.5579	27.8907	38.4573	26.0633
ENSMUSG00000046818	Ddit4l	-0.641857	0.00160777	0.0103388	6.19935	7.39282	5.55927	7.59134	3.93288	5.88943	3.69122	3.04993
ENSMUSG00000036513	Commd2	-0.642277	5.2e-05	0.000617882	5.59533	6.32415	5.79211	6.92703	4.06387	4.42438	2.84931	3.86239
ENSMUSG00000022620	Arsa	-0.642747	7.2e-09	3.02e-07	18.5273	16.5139	18.7542	19.6714	9.40515	12.6594	12.3985	10.7459
ENSMUSG00000002688	Prkd1	-0.642953	3.75e-06	6.72e-05	5.33147	4.48095	6.06756	4.87522	3.56369	3.42432	3.0672	2.70897
ENSMUSG00000030101	Sumf1	-0.645167	7.85e-11	6.14e-09	36.8344	40.2509	37.4608	38.9356	24.4909	26.2753	23.8362	19.8247
ENSMUSG00000028039	Efna3	-0.647304	0.000562585	0.00439118	6.04037	5.68791	6.37729	5.19953	2.88043	4.03453	4.63856	2.72632
ENSMUSG00000028719	Cmpk1	-0.647406	2.54e-07	6.84e-06	19.9884	19.8494	18.3021	18.244	13.133	9.82688	12.3133	11.5022
ENSMUSG00000032932	Hspa13	-0.647599	3.62e-11	3.05e-09	11.9824	13.4894	12.0981	12.6119	7.73041	8.61084	7.33301	7.13283
ENSMUSG00000028497	Hacd4	-0.647891	7.39e-06	0.000119761	40.646	42.6775	39.6595	35.8263	20.2623	21.5128	25.6847	29.7308
ENSMUSG00000005952	Trpv1	-0.651818	0.0442168	0.13403	0.972392	0.982987	0.541774	0.775431	0.393228	0.614282	0.616005	0.375451
ENSMUSG00000022722	Arl6	-0.653217	3.02e-07	7.9e-06	10.9328	11.1125	10.1071	11.1959	5.6497	7.1966	6.92956	6.69635
ENSMUSG00000038793	Lefty1	-0.656171	0.0436574	0.132794	1.27632	1.25145	1.20153	0.957607	0.652662	0.674706	0.902132	0.614956
ENSMUSG00000021763	BC067074	-0.656252	0.00032582	0.0028282	1.78152	1.6698	1.63159	1.70244	1.26989	1.24031	0.912599	0.722429
ENSMUSG00000078440	Dohh	-0.657531	0.000126765	0.00130064	9.19178	8.73586	11.61	12.9778	5.58311	7.61147	7.00027	5.70325
ENSMUSG00000025544	Tm9sf2	-0.658668	1.32e-29	2.12e-26	87.9505	86.9286	90.3348	86.5186	54.1715	53.6682	52.486	53.6111
ENSMUSG00000000058	Cav2	-0.659028	9.27e-15	1.67e-12	33.7273	33.6558	32.1875	31.2195	18.8599	22.5519	19.2953	18.955
ENSMUSG00000061068	Mcpt4	-0.661264	0.0242646	0.0850682	10.6548	10.9106	9.97383	8.17665	6.44121	7.61785	7.69418	2.45761
ENSMUSG00000033488	BC026585	-0.663037	5.54e-08	1.82e-06	13.4386	12.5299	14.8631	12.1191	8.08668	7.91883	8.80666	7.26546
ENSMUSG00000022194	Pabpn1	-0.663765	2.79e-08	1e-06	21.7192	18.9938	25.7173	23.8773	12.2112	15.2579	14.7175	12.5347
ENSMUSG00000047749	Zc3hav1l	-0.663833	0.000319303	0.00277776	1.65317	1.97597	1.93096	1.96526	0.909943	1.46792	1.29502	0.894208
ENSMUSG00000066829	Zfp810	-0.66422	3.33e-05	0.000423337	34.3172	35.4332	32.9462	29.8	15.9797	21.2476	26.3096	16.8807
ENSMUSG00000035960	Apex1	-0.664871	4.44e-11	3.66e-09	24.4937	26.9682	28.7343	29.1483	15.8938	16.8105	16.9559	16.5636
ENSMUSG00000022519	Srl	-0.666272	7.31e-05	0.00082223	5.77606	5.00078	5.81433	5.88262	3.59486	4.04419	3.75107	2.23155
ENSMUSG00000047037	Nipa1	-0.667548	0.000427987	0.00353448	3.37367	4.50568	3.6297	3.89902	2.69892	2.63269	2.37224	1.62752
ENSMUSG00000028636	Ppcs	-0.669363	0.000239276	0.00220073	7.60782	8.22402	6.02261	7.35949	3.55464	5.50959	4.22272	4.39038
ENSMUSG00000016262	Sertad4	-0.669827	2.1e-08	7.82e-07	5.37567	5.73797	6.72882	6.14972	3.33369	3.80655	3.67181	3.66771
ENSMUSG00000079419	Ms4a6c	-0.671776	0.0134852	0.054634	5.36194	4.64959	5.66165	5.83116	3.66125	4.05703	1.45537	3.82402
ENSMUSG00000021518	Ptdss1	-0.672169	3.58e-19	1.34e-16	39.7578	42.0389	43.2046	42.4258	24.1246	28.411	25.1116	23.3734
ENSMUSG00000015776	Med22	-0.673133	1.56e-11	1.41e-09	20.1845	20.4957	25.0013	23.8937	13.3634	14.4275	12.1058	14.037
ENSMUSG00000049791	Fzd4	-0.673948	3.78e-06	6.75e-05	26.5701	23.9004	23.5088	25.4306	15.7043	16.9881	16.8274	10.4762
ENSMUSG00000001891	Ugp2	-0.674389	1.68e-08	6.46e-07	53.6717	54.517	53.4989	54.3281	36.8463	33.6548	34.4528	25.1749
ENSMUSG00000025154	Arhgap19	-0.676646	2.31e-08	8.49e-07	3.96032	3.78156	3.81439	4.20739	2.39568	2.17762	2.38659	2.51189
ENSMUSG00000003623	Crot	-0.68036	2.29e-05	0.000311089	188.451	158.695	191.471	191.088	142.972	116.745	97.8246	79.8491
ENSMUSG00000047473	Zfp30	-0.68058	0.00463453	0.0239316	1.60133	1.64069	1.16873	1.43959	1.0161	0.999228	0.919897	0.573318
ENSMUSG00000021072	Tmx1	-0.681054	1.54e-13	2.25e-11	14.9385	13.4055	15.6132	14.4309	8.72425	8.47306	9.12864	8.62567
ENSMUSG00000031730	Dhodh	-0.681791	3.42e-08	1.2e-06	10.0038	8.42187	10.1269	10.8393	4.94704	6.79492	5.63033	6.22807
ENSMUSG00000049100	Pcdh10	-0.683241	0.0311063	0.102621	0.567023	0.556266	0.663433	0.685793	0.489556	0.516232	0.325399	0.153254
ENSMUSG00000062014	Gmfb	-0.685645	1.01e-15	2.23e-13	24.2422	24.4649	24.8088	22.42	15.4313	13.9616	13.7818	14.092
ENSMUSG00000053164	Gpr21	-0.686127	2.54e-07	6.85e-06	3.5017	3.34042	3.64351	3.37785	1.99031	2.31552	1.93501	2.03705
ENSMUSG00000031442	Mcf2l	-0.688938	0.0127727	0.052402	5.62673	4.50693	5.81329	5.55119	4.41199	4.52356	2.38328	1.55089
ENSMUSG00000054178	Gm9938	-0.689682	5.29e-08	1.75e-06	9.26785	8.38098	9.47568	8.58705	4.96744	5.7058	4.88955	5.71111
ENSMUSG00000052372	Il1rapl1	-0.693776	0.0194374	0.0718006	0.438179	0.295973	0.316252	0.231008	0.188124	0.22606	0.193356	0.152712
ENSMUSG00000030729	Pgm2l1	-0.694121	6.74e-06	0.000110941	2.18955	2.49893	1.87644	2.02301	1.28663	1.43663	1.33727	1.04502
ENSMUSG00000036639	Nudt1	-0.694913	0.000286131	0.00254703	9.50833	10.2319	12.966	10.3422	4.84879	5.85594	7.59578	7.17062
ENSMUSG00000020251	Glt8d2	-0.695133	0.000818599	0.00598962	3.89429	4.05463	3.8992	4.6702	2.98852	3.11508	2.13735	1.59146
ENSMUSG00000048174	Tmem81	-0.69778	3.27e-05	0.000416633	4.9138	4.63128	5.41477	4.89052	3.39656	3.01711	2.39959	2.95853
ENSMUSG00000109378	U2af1l4	-0.69877	0.0246056	0.0859883	0.754152	0.549354	0.814367	0.784174	0.351617	0.484658	0.526519	0.35339
ENSMUSG00000026765	Lypd6b	-0.698806	0.0124279	0.0513243	2.59673	2.13501	1.81283	2.8502	1.41646	1.83286	1.57163	0.75538
ENSMUSG00000021361	Tmem14c	-0.699779	6.51e-11	5.16e-09	47.6519	57.4241	55.0269	57.64	30.2936	32.222	31.7128	34.5156
ENSMUSG00000027375	Mal	-0.699975	3.22e-12	3.46e-10	41.8484	43.4898	39.0345	37.3926	22.4317	23.673	26.2822	23.286
ENSMUSG00000055761	Nkain3	-0.700155	0.00203473	0.0125087	0.876262	1.16732	1.00365	1.01904	0.477492	0.62492	0.586672	0.712579
ENSMUSG00000021102	Glrx5	-0.702032	1.32e-09	6.99e-08	6.17955	5.77591	6.86931	6.27954	3.61474	4.04824	3.66404	3.49674
ENSMUSG00000098132	Rassf10	-0.702595	0.00642308	0.0308472	3.07162	1.97597	3.05328	2.8577	0.926207	2.13644	2.02051	1.38682
ENSMUSG00000024477	Pggt1b	-0.704162	1.18e-09	6.38e-08	15.1143	14.7374	17.9465	18.7565	10.3374	9.74329	8.81359	10.3167
ENSMUSG00000046280	She	-0.705751	0.0025804	0.0150783	2.23374	1.67645	2.56285	2.33794	1.72899	1.39814	1.30646	0.753008
ENSMUSG00000051184	Zfp524	-0.706359	0.0293189	0.0980715	2.74608	2.85365	2.38631	1.91612	1.41268	2.30778	0.867847	1.26205
ENSMUSG00000036781	Rps27l	-0.708571	2.19e-10	1.45e-08	46.2827	54.9766	54.0538	49.5344	27.697	30.9426	30.394	31.3018
ENSMUSG00000046324	Ermp1	-0.709777	3.7e-07	9.35e-06	18.8339	18.926	20.2212	18.4453	12.4899	13.6882	10.6724	8.15841
ENSMUSG00000039470	Zdhhc2	-0.710274	0.000860105	0.00621058	1.63737	2.24305	2.54428	2.31253	1.32907	1.63438	1.1887	0.982184
ENSMUSG00000025779	Ly96	-0.714192	0.000401567	0.00335619	10.6156	8.23023	8.57938	9.68995	4.76267	4.92353	5.76024	6.28253
ENSMUSG00000049999	Ppp1r3d	-0.714522	0.00080633	0.00590533	2.10282	1.70077	2.05648	2.03234	1.51704	1.26391	0.913316	0.93514
ENSMUSG00000001946	Esam	-0.716915	0.000106506	0.0011261	15.5927	13.3667	15.6554	12.7766	10.3109	10.126	7.57501	5.59099
ENSMUSG00000024601	Isoc1	-0.717029	1.27e-07	3.69e-06	13.324	13.9451	12.2003	10.6529	6.23951	8.36341	7.41276	7.3075
ENSMUSG00000044600	Smim7	-0.720683	2e-12	2.25e-10	21.0565	19.9141	24.4472	23.6668	13.093	14.8869	11.4334	12.539
ENSMUSG00000034723	Tmx4	-0.720762	3.58e-13	4.86e-11	13.6726	15.1596	13.0545	13.4101	8.59741	8.15475	8.01119	7.49108
ENSMUSG00000037358	4930578C19Rik	-0.721507	0.0149575	0.0591295	1.27716	1.37341	1.38177	1.43649	1.22759	0.833018	0.730936	0.398606
ENSMUSG00000030643	Rab30	-0.723235	6.6e-11	5.21e-09	3.71721	3.6527	3.44627	3.4452	1.97072	2.07421	2.34406	1.9034
ENSMUSG00000025170	Rab40b	-0.72671	0.000250841	0.00228957	4.87423	3.34885	4.28496	4.13464	2.23706	2.61036	2.91218	1.89146
ENSMUSG00000066894	Vsig10	-0.728004	2.93e-11	2.5e-09	24.0749	21.7142	25.5102	24.9032	12.7921	15.1236	16.0429	11.8218
ENSMUSG00000022383	Ppara	-0.729788	9.59e-05	0.00103138	5.1201	4.86205	5.02245	5.09078	2.98173	3.78966	3.06878	1.82919
ENSMUSG00000063787	Chchd1	-0.730753	7.95e-08	2.46e-06	40.0622	42.4191	35.9818	32.8397	21.8843	21.0955	23.6261	20.9165
ENSMUSG00000021712	Trim23	-0.731528	5.55e-14	8.92e-12	10.3854	10.0339	9.34916	10.7405	5.69566	6.31765	5.57741	5.86476
ENSMUSG00000028173	Wls	-0.735739	7.05e-22	4.27e-19	63.7558	58.3563	63.9189	57.9033	33.7002	34.6188	37.5903	34.6539
ENSMUSG00000042099	Kank3	-0.736842	0.0130674	0.0533515	12.3487	8.80542	11.4357	12.7756	9.74287	8.72386	4.75303	3.03026
ENSMUSG00000074824	Rslcan18	-0.737125	0.0337466	0.109097	0.648048	0.400539	0.418678	0.591093	0.377684	0.358627	0.313228	0.139182
ENSMUSG00000028378	Ptgr1	-0.737802	2.37e-06	4.57e-05	50.1398	62.7249	56.6913	54.2693	30.4795	40.0151	35.8309	23.1412
ENSMUSG00000034990	Otoa	-0.738968	0.0483165	0.143132	0.414274	0.656383	0.375554	0.356872	0.228026	0.321289	0.168099	0.320847
ENSMUSG00000027298	Tyro3	-0.739259	2.77e-05	0.00036233	2.12357	2.5085	2.50596	2.96351	1.28904	1.85166	1.28341	1.39978
ENSMUSG00000032763	Ilvbl	-0.743238	3.77e-08	1.31e-06	39.5993	50.8949	40.9381	45.7384	24.8136	31.8095	23.6922	21.8379
ENSMUSG00000029403	Cdkl2	-0.745368	6.37e-05	0.000728861	7.66061	8.19934	8.58611	8.25643	5.28201	6.24261	4.29822	2.98918
ENSMUSG00000051335	Gfod1	-0.745571	0.00460831	0.0238431	4.06273	4.12934	4.25064	4.43363	2.54675	3.69881	2.39075	1.10245
ENSMUSG00000046798	Cldn12	-0.746847	2.26e-06	4.38e-05	14.5591	14.9893	14.8607	15.4471	10.4794	9.62967	8.30962	5.91224
ENSMUSG00000031312	Itgb1bp2	-0.748157	0.000125894	0.00129395	4.26381	3.71434	5.11302	4.4391	2.56483	2.72655	2.27078	2.47667
ENSMUSG00000039005	Tlr4	-0.752055	8.85e-06	0.000139286	3.30464	3.07567	3.1572	2.52656	1.75052	2.08519	1.35917	1.69418
ENSMUSG00000039109	F13a1	-0.755457	0.00260931	0.0152021	15.375	15.8267	14.7283	13.5034	10.9356	12.4459	5.67028	5.02484
ENSMUSG00000015354	Pcolce2	-0.761144	0.000843626	0.0061253	1.50289	1.52271	1.37238	1.46813	0.655162	1.24512	0.699772	0.733292
ENSMUSG00000045930	Clec14a	-0.761255	8.63e-05	0.000947256	3.00587	2.56258	2.98083	2.11775	1.64808	1.78013	1.57197	1.04614
ENSMUSG00000022040	Ephx2	-0.762352	6.62e-15	1.25e-12	87.4122	82.4294	91.2072	76.476	43.2212	46.1917	49.7625	51.6636
ENSMUSG00000008540	Mgst1	-0.763295	3.46e-08	1.21e-06	38.0071	36.9321	34.0582	36.6894	19.6491	26.9015	19.4631	16.7319
ENSMUSG00000038174	Fam126b	-0.767466	3.2e-18	1.06e-15	7.0346	6.95968	6.51394	6.62327	4.00981	3.88743	3.72305	3.69356
ENSMUSG00000020774	Aspa	-0.771284	0.000101006	0.00107656	1.96688	2.05224	1.79141	1.65137	1.01397	1.31027	1.10955	0.764309
ENSMUSG00000020098	Pcbd1	-0.774988	9.22e-15	1.67e-12	77.265	87.0778	85.4705	86.2764	48.3262	48.3326	51.0922	40.9098
ENSMUSG00000021130	Galnt16	-0.775005	0.00040729	0.00339681	1.02685	1.03151	1.04104	1.30808	0.657377	0.604072	0.663458	0.550577
ENSMUSG00000033191	Tie1	-0.775519	0.000448803	0.00366918	6.82104	5.2848	7.62257	6.03822	4.3857	4.57506	3.48047	2.0392
ENSMUSG00000038323	1700066M21Rik	-0.777142	2.99e-08	1.06e-06	3.96907	4.34345	4.46709	4.62096	2.43853	2.26098	2.49001	2.56123
ENSMUSG00000028618	Tmem59	-0.77935	6.81e-20	3.09e-17	116.6	115.909	109.449	130.643	66.9756	70.6788	65.3195	61.813
ENSMUSG00000000385	Tmprss2	-0.783573	8.67e-11	6.63e-09	30.0448	32.6351	28.1252	27.7559	14.1829	18.4151	18.6402	15.0533
ENSMUSG00000039628	Hs3st6	-0.785331	0.000798087	0.00585768	8.53561	10.5947	8.08695	9.87553	4.39101	5.62901	7.29328	3.37797
ENSMUSG00000027820	Mme	-0.791291	0.000192168	0.00183609	5.86585	4.23116	4.60828	4.32263	3.4607	2.72686	2.78753	1.5945
ENSMUSG00000006642	Tcf23	-0.795162	0.00211283	0.0128716	5.31511	7.20585	4.50024	6.21132	3.82107	4.77999	2.20437	2.17834
ENSMUSG00000003418	St8sia6	-0.796469	3.99e-06	7.08e-05	2.61784	2.76967	2.5716	3.3071	1.84766	1.75363	1.53474	1.10721
ENSMUSG00000006611	Hfe	-0.797628	1.59e-05	0.000229516	3.97724	4.39337	3.74418	3.63076	2.3495	2.88998	1.68771	1.80355
ENSMUSG00000040774	Cept1	-0.802342	3.34e-27	4.15e-24	29.9122	29.2182	31.2387	30.828	15.6164	16.9396	16.9871	17.1821
ENSMUSG00000056755	Grm7	-0.803261	0.00350072	0.019287	1.90113	2.19375	1.4467	1.82769	1.28711	1.28371	0.98356	0.520595
ENSMUSG00000044976	Wdr72	-0.803356	0.00462453	0.0239009	0.628985	0.895954	1.18426	0.967338	0.53415	0.607703	0.585969	0.293986
ENSMUSG00000023984	Gm20517	-0.803781	0.00077684	0.00572843	0.888013	0.656052	0.84904	0.890712	0.453653	0.480028	0.367365	0.511206
ENSMUSG00000090000	Ier3ip1	-0.805459	1.16e-06	2.48e-05	9.45223	7.64356	10.277	9.99122	5.67171	4.16136	5.06436	5.61194
ENSMUSG00000035776	Cd99l2	-0.807082	5.86e-13	7.65e-11	26.9386	27.8864	26.3891	28.2168	14.483	17.6942	15.8662	12.1761
ENSMUSG00000044026	Slc35g1	-0.807746	5.73e-09	2.48e-07	13.7585	14.5371	14.1643	14.7668	7.7486	9.60451	8.35077	5.77857
ENSMUSG00000025875	Tspan17	-0.808731	6.92e-05	0.000785896	5.47051	4.83208	5.78379	6.26402	2.45984	4.3675	2.6509	2.80746
ENSMUSG00000098557	Kctd12	-0.809182	3.83e-14	6.33e-12	34.742	30.0248	29.7622	37.2809	17.7288	19.4291	16.2062	18.9476
ENSMUSG00000046997	Spsb4	-0.810523	0.000521471	0.00412065	5.09751	5.15201	6.24912	5.85962	2.08751	4.37276	3.74382	2.07548
ENSMUSG00000032419	Tbx18	-0.811766	0.0329986	0.107354	0.413389	0.417238	0.550199	0.251978	0.282462	0.285514	0.169186	0.156138
ENSMUSG00000043448	Gjc2	-0.813128	0.00502424	0.0254815	1.55537	1.236	1.34939	1.47542	0.694964	1.13839	0.723933	0.51626
ENSMUSG00000028293	Slc35a1	-0.815419	1.13e-12	1.37e-10	11.6779	11.379	13.334	11.6558	7.12999	7.02833	6.30143	5.76533
ENSMUSG00000027840	Wnt2b	-0.81564	0.00147293	0.00966902	7.09597	7.49057	6.73694	6.37735	4.44132	5.7649	3.02818	2.00167
ENSMUSG00000028179	Cth	-0.8174	5.74e-18	1.83e-15	35.2416	38.9293	39.9917	34.9069	18.5685	20.9772	20.2309	21.4432
ENSMUSG00000025889	Snca	-0.818473	0.0485925	0.143661	0.758472	0.907232	1.07104	1.36719	0.657533	0.820006	0.389513	0.377628
ENSMUSG00000067377	Tspan6	-0.819323	0.000744528	0.0055351	2.68304	3.48845	3.23732	2.70712	1.87201	2.16747	1.13853	1.4299
ENSMUSG00000037577	Ephx3	-0.822513	0.0153501	0.060295	0.828205	0.994527	0.779674	0.975998	0.683796	0.427277	0.529293	0.302388
ENSMUSG00000041945	Mfsd9	-0.823129	2.67e-07	7.14e-06	6.54693	7.66515	7.24425	7.04678	3.55258	4.01645	4.9105	2.98879
ENSMUSG00000036242	3632451O06Rik	-0.82316	0.000444166	0.00363757	2.30358	3.00143	2.11883	2.46638	1.51904	1.95971	1.0688	0.86488
ENSMUSG00000074852	Hpse2	-0.823336	0.00329513	0.0183469	10.6477	11.9869	9.70612	9.45269	6.42619	7.54351	6.50357	2.35197
ENSMUSG00000068196	Col8a1	-0.829132	0.0171971	0.0655316	0.4309	0.440995	0.811301	0.437335	0.206992	0.427966	0.238426	0.273046
ENSMUSG00000071531	Gprin2	-0.831693	0.000206918	0.00194554	0.869639	0.920999	0.867195	0.910957	0.389319	0.715499	0.499902	0.327137
ENSMUSG00000031007	Atp6ap2	-0.834061	2.71e-16	6.67e-14	35.4441	37.9311	35.4206	35.4054	20.5867	22.1834	18.4726	16.6038
ENSMUSG00000023150	Ivns1abp	-0.835764	4.47e-30	9.59e-27	294.414	300.732	298.533	284.072	162.674	152.06	165.39	153.355
ENSMUSG00000022132	Cldn10	-0.838473	0.000416622	0.0034567	2.06864	1.94068	1.97693	1.80793	1.14898	1.19849	1.11601	0.717834
ENSMUSG00000022018	Rgcc	-0.838588	0.0424656	0.130225	7.55621	1.88126	5.06149	3.71777	2.73542	3.30738	2.52066	1.22991
ENSMUSG00000043385	Olfr267	-0.839642	0.00346504	0.0191262	0.87284	0.889917	0.604642	0.903981	0.42423	0.539765	0.496173	0.295179
ENSMUSG00000001095	Slc13a2	-0.840108	1.7e-08	6.5e-07	24.196	17.1529	27.5161	25.9326	10.8219	13.7711	12.4211	13.7401
ENSMUSG00000028883	Sema3a	-0.840662	5.2e-07	1.25e-05	1.92334	2.06394	1.62004	2.12424	1.10322	1.13665	1.03715	0.873591
ENSMUSG00000045140	Pigw	-0.842962	0.000290575	0.00257527	2.19418	3.14382	3.05147	3.45641	1.63044	2.06574	1.61625	1.04278
ENSMUSG00000051726	Kcnf1	-0.843611	0.00115144	0.0078919	1.89412	1.97555	2.56981	1.64559	0.593345	1.54694	1.05538	1.1372
ENSMUSG00000025270	Alas2	-0.844153	0.0122498	0.0508128	4.25663	4.71827	3.97638	6.33628	2.33574	4.71003	2.21215	1.17376
ENSMUSG00000044083	Efcab8	-0.848137	0.0228269	0.0811605	0.704971	1.67545	1.14297	1.42106	0.504443	0.641823	0.822408	0.662983
ENSMUSG00000025993	Slc40a1	-0.848637	0.000910446	0.00652026	1.56218	1.75865	1.56655	1.73773	0.689757	1.4377	0.728619	0.693235
ENSMUSG00000019775	Rgs17	-0.850137	0.0310714	0.102565	0.162857	0.229175	0.229971	0.143939	0.104879	0.133442	0.111514	0.0567583
ENSMUSG00000029851	Tcaf2	-0.853784	3.14e-07	8.17e-06	3.11466	3.4229	3.72801	3.91884	1.63111	2.29553	2.15302	1.46211
ENSMUSG00000022066	Entpd4b	-0.854084	0.00255177	0.0149702	2.5646	3.93322	7.59286	3.8729	2.26472	2.04724	2.49412	2.66475
ENSMUSG00000026456	Cyb5r1	-0.860586	5.67e-05	0.000661619	20.919	23.6741	19.6672	22.3852	12.5337	14.93	12.3549	6.28475
ENSMUSG00000050796	B3galt6	-0.862254	2.1e-07	5.75e-06	3.35166	3.27797	3.51023	4.01473	2.07544	2.13601	1.836	1.43928
ENSMUSG00000089824	Rbm12	-0.862782	7.57e-14	1.18e-11	4.53191	3.46884	4.35111	4.29075	2.1806	2.34078	2.10987	2.16171
ENSMUSG00000020570	Sypl	-0.866202	6.06e-17	1.68e-14	33.0088	36.7398	34.6041	33.9373	20.0401	20.3586	17.1268	15.4911
ENSMUSG00000027955	Fam198b	-0.867686	8.89e-05	0.00096928	7.30517	7.04113	6.96109	7.05461	4.5076	4.60232	3.96367	1.91478
ENSMUSG00000031517	Gpm6a	-0.871165	0.000472957	0.00381729	21.1401	22.164	18.9444	18.3746	13.9564	13.7313	9.77333	5.14383
ENSMUSG00000028864	Hgf	-0.8729	0.00110994	0.00767441	2.2502	2.81467	2.11834	1.77141	1.27667	1.71595	1.01841	0.708583
ENSMUSG00000030935	Acsm3	-0.887927	0.00154452	0.0100332	2.57076	1.16219	1.77222	1.63842	1.22337	0.829305	0.887074	0.765943
ENSMUSG00000041624	Gucy1a2	-0.888514	0.000222199	0.00206457	4.45617	4.20374	3.94257	4.52969	3.24994	2.29146	2.10953	1.25312
ENSMUSG00000073295	Nudt11	-0.89733	5.39e-07	1.29e-05	9.64443	11.3273	10.5477	8.87054	6.42102	6.32037	4.17192	3.98142
ENSMUSG00000057751	Megf6	-0.897747	7.59e-06	0.000122121	5.69529	3.86887	5.00412	5.87832	1.90018	3.73152	2.6665	2.27815
ENSMUSG00000038217	Tlcd2	-0.898795	1.67e-05	0.000238129	5.90044	5.73082	4.51999	5.22041	2.75103	3.21261	2.85193	2.18888
ENSMUSG00000028717	Tal1	-0.90021	0.00314111	0.0176769	0.83907	0.891132	0.834614	0.780633	0.56467	0.605362	0.289076	0.267994
ENSMUSG00000033031	C330027C09Rik	-0.900431	4.05e-05	0.000499571	2.04606	1.77474	1.62619	1.40427	0.864035	0.70236	0.918691	1.03539
ENSMUSG00000042258	Isl1	-0.90858	0.0265778	0.0912016	1.03387	0.626718	0.998248	0.912543	0.341441	0.796454	0.508256	0.18478
ENSMUSG00000004988	Fxyd4	-0.910187	1.98e-21	1.14e-18	97.4605	86.3592	99.7095	98.1254	41.8869	51.5062	48.6034	52.955
ENSMUSG00000028696	Ipp	-0.910539	2.26e-09	1.11e-07	7.27444	6.98399	8.24153	7.85183	3.15122	4.58724	3.39258	4.39006
ENSMUSG00000056966	Gjc3	-0.911967	0.00351221	0.0193413	0.83331	0.637919	0.847238	0.728758	0.445831	0.500719	0.426044	0.182551
ENSMUSG00000042961	Egflam	-0.912718	5.88e-07	1.39e-05	2.87564	3.03302	3.64018	3.37668	1.9501	2.05886	1.40191	1.19542
ENSMUSG00000068696	Gpr88	-0.912832	0.0260449	0.08987	0.403765	0.389611	0.633509	0.733402	0.457183	0.245065	0.193091	0.210599
ENSMUSG00000021139	Gm20498	-0.915131	0.0043773	0.0228784	1.08049	0.789003	1.48452	1.24975	0.520787	0.824182	0.453238	0.552491
ENSMUSG00000031286	Glt28d2	-0.916681	2.71e-06	5.09e-05	2.63668	3.40804	3.14868	3.65685	1.59642	1.73369	1.93915	1.26413
ENSMUSG00000024371	C2	-0.917821	6.85e-05	0.000778255	3.68721	4.54899	4.04175	3.31294	1.8516	3.01204	1.614	1.48372
ENSMUSG00000057722	Lepr	-0.91795	2.87e-06	5.34e-05	6.45078	8.77954	5.16639	5.88954	3.12405	4.36088	2.98866	2.98401
ENSMUSG00000022225	Cma1	-0.919359	6.54e-05	0.000745863	11.9934	13.2952	19.0097	15.0863	9.27574	9.30352	7.15085	4.448
ENSMUSG00000058173	Smco4	-0.921072	8.04e-05	0.00089339	8.11919	5.89212	6.75906	7.17916	3.98886	4.76503	3.1856	2.27175
ENSMUSG00000021696	Elovl7	-0.921726	7.23e-05	0.000814727	1.22992	1.30976	1.53337	1.19065	0.65868	0.862508	0.698012	0.446851
ENSMUSG00000032271	Nnmt	-0.923244	0.00180636	0.011359	2.55793	2.08774	2.94986	2.32029	1.33051	1.51372	1.28444	0.89148
ENSMUSG00000030031	Kbtbd8	-0.926293	6.82e-11	5.37e-09	2.61642	2.48284	2.73392	2.48518	1.46578	1.28456	1.22563	1.24128
ENSMUSG00000040055	Gjb6	-0.930426	0.0318996	0.104688	0.633711	0.499389	0.53692	0.589577	0.251143	0.259626	0.433923	0.189307
ENSMUSG00000056130	Ticam2	-0.930634	0.0296951	0.0989934	0.798097	0.673856	0.375665	0.689477	0.480083	0.259502	0.286253	0.255443
ENSMUSG00000037709	Fam13a	-0.936448	4.73e-05	0.000569174	5.93666	5.58025	4.34081	5.33016	2.86668	3.54728	2.8521	1.43483
ENSMUSG00000054978	Kbtbd13	-0.936479	0.0431486	0.131551	0.359438	0.404644	0.338375	0.334404	0.155801	0.204525	0.266629	0.0894783
ENSMUSG00000030325	Klrb1c	-0.936515	0.0329576	0.107277	0.330566	0.744284	0.550578	0.757032	0.277126	0.208354	0.255369	0.455766
ENSMUSG00000039461	Tcta	-0.939341	1.43e-14	2.54e-12	54.742	51.5434	62.978	59.8952	29.4754	34.8032	28.001	22.6561
ENSMUSG00000017309	Cd300lg	-0.940656	0.000564936	0.00440661	5.1175	3.56642	4.86351	3.92223	3.21115	2.70671	1.55739	1.28608
ENSMUSG00000045534	Kcna5	-0.94989	0.00934021	0.0414129	0.88558	0.524715	1.0092	0.737177	0.554147	0.424344	0.382981	0.208853
ENSMUSG00000031997	Trpc6	-0.952158	0.0334355	0.108355	0.593509	0.299518	0.346798	0.39985	0.223045	0.167693	0.298958	0.122274
ENSMUSG00000034997	Htr2a	-0.952946	0.0278562	0.0943388	0.273646	0.281274	0.212809	0.287795	0.235755	0.108319	0.0868982	0.0947774
ENSMUSG00000074109	Mrgprx2	-0.95957	0.0112394	0.0476251	0.477449	0.325756	0.313268	0.323052	0.172014	0.210754	0.211346	0.115254
ENSMUSG00000026676	Ccdc3	-0.960225	5.82e-06	9.81e-05	3.5972	3.40281	3.12773	2.18463	1.33649	1.61475	1.50524	1.61685
ENSMUSG00000036395	Glb1l2	-0.966847	3.95e-09	1.79e-07	505.43	375.599	569.76	449.767	185.845	203.053	269.014	270.841
ENSMUSG00000024481	Lvrn	-0.987311	0.000185937	0.0017894	2.3621	1.58618	2.2822	2.21686	1.31384	1.32049	0.8891	0.577704
ENSMUSG00000040505	Abcg5	-0.99756	0.00118857	0.00809718	0.992954	1.59691	1.52234	1.3725	0.815134	0.645721	0.777039	0.395497
ENSMUSG00000023236	Scg5	-1.00335	0.00739572	0.0345558	2.31897	5.84284	2.49496	4.46904	1.80522	2.06098	1.05859	2.36412
ENSMUSG00000048003	Catsper4	-1.01069	0.0261555	0.0901322	0.773312	0.696457	0.946397	1.47488	0.459701	0.457627	0.741317	0.192508
ENSMUSG00000034258	Flvcr2	-1.01476	0.0042267	0.0222538	0.737854	0.568342	0.877412	0.975505	0.480946	0.548015	0.265912	0.212684
ENSMUSG00000021986	Amer2	-1.018	0.00323816	0.0181366	0.2222	0.285881	0.233086	0.277602	0.125799	0.167617	0.139107	0.0505732
ENSMUSG00000057899	Adgrf2	-1.02776	0.0119789	0.0499698	0.487441	0.457288	0.497118	0.359015	0.100612	0.221889	0.259597	0.262911
ENSMUSG00000047911	Npm2	-1.03956	0.0428779	0.131081	0.869685	0.82844	0.692766	0.871355	0.463966	0.48725	0.244309	0.333076
ENSMUSG00000091275	Gm3248	-1.04287	0.0245042	0.085752	0.454391	0.401924	0.702757	0.634118	0.321567	0.147746	0.296321	0.258551
ENSMUSG00000032330	Cox7a2	-1.05701	6.65e-30	1.31e-26	125.401	131.715	133.488	134.37	58.9624	59.71	68.1014	55.4301
ENSMUSG00000001865	Cpa3	-1.05875	0.00141289	0.00933455	6.67442	7.8766	7.23664	7.32302	3.83084	5.65748	2.81566	1.23755
ENSMUSG00000074345	Tnfaip8l3	-1.05986	1.59e-05	0.000229626	1.10583	1.96116	1.63998	1.39524	0.720404	0.799902	0.525544	0.769289
ENSMUSG00000072680	Tmem254c	-1.06014	0.00478709	0.0244838	1.32185	1.86012	1.71103	1.22979	0.381977	0.802293	0.854828	0.767807
ENSMUSG00000026069	Il1rl1	-1.06173	0.000930628	0.00663662	1.97503	1.74192	1.90667	1.58	1.04694	1.17965	0.815441	0.288109
ENSMUSG00000071014	Ndufb6	-1.06424	1.98e-10	1.35e-08	36.9421	33.8403	43.6384	47.0811	20.2558	22.1148	18.5731	13.3032
ENSMUSG00000040016	Ptger3	-1.06448	0.000346436	0.0029722	2.98342	3.27468	2.84371	2.81034	1.34861	2.18992	1.39595	0.575587
ENSMUSG00000030346	Rad51ap1	-1.06841	0.0317371	0.104254	0.358431	0.840649	0.590499	0.472414	0.207154	0.163162	0.21816	0.446139
ENSMUSG00000026405	C4bp	-1.07623	1.15e-09	6.23e-08	8.27438	7.53797	8.83466	7.52059	2.57797	3.47443	3.81676	4.75012
ENSMUSG00000054763	Defb42	-1.08163	7e-05	0.000792752	188.285	185.416	195.54	193.05	100.698	117.217	96.2373	33.8513
ENSMUSG00000027048	Abcb11	-1.08843	0.0462472	0.138425	0.411471	0.313795	0.324882	0.197581	0.223561	0.157096	0.169655	0.013217
ENSMUSG00000030165	Klrd1	-1.08849	0.00215152	0.0130601	2.03215	2.12433	2.52799	1.75558	1.1505	0.991136	0.59635	1.08404
ENSMUSG00000070661	Rnf186	-1.10171	0.00182735	0.0114605	3.09727	3.30646	3.01632	1.83824	0.52908	1.50715	1.60889	1.38254
ENSMUSG00000079014	Serpina3i	-1.10562	0.0141609	0.056647	0.424443	0.750868	0.656439	0.620529	0.150186	0.358821	0.193753	0.392454
ENSMUSG00000028020	Glrb	-1.1193	0.00268349	0.0155767	0.748675	1.01636	0.870641	0.839937	0.479962	0.621469	0.201036	0.241191
ENSMUSG00000037636	Slc25a43	-1.13236	0.00014625	0.0014648	2.90669	4.79153	4.00682	4.20125	1.02851	2.69358	1.6112	1.65392
ENSMUSG00000048142	Nat8l	-1.14193	0.00152013	0.00991273	0.500568	0.23001	0.423151	0.446697	0.23279	0.195312	0.16788	0.101724
ENSMUSG00000022754	Tmem45a	-1.15552	1.37e-05	0.000203565	1.82735	1.91817	1.81326	1.79198	1.14989	0.764384	0.789073	0.467194
ENSMUSG00000074232	Gm10647	-1.15956	0.00548881	0.0272812	0.851744	1.03263	0.801834	0.640035	0.292111	0.268424	0.598172	0.260964
ENSMUSG00000029802	Abcg2	-1.16014	1.95e-13	2.76e-11	492.145	552.939	522.692	515.451	244.274	253.25	252.267	148.293
ENSMUSG00000029811	Aoc1	-1.17185	6.73e-10	3.93e-08	4.61774	3.60714	4.21408	4.64685	1.86738	1.65161	2.34456	1.4076
ENSMUSG00000026429	Ube2t	-1.20507	0.0225922	0.0805442	0.45233	0.370342	0.561314	0.229542	0.0814822	0.14975	0.112627	0.327572
ENSMUSG00000028217	Cdh17	-1.20971	2.5e-10	1.63e-08	16.5686	20.9731	14.981	16.2392	8.1505	9.17343	6.54319	4.87276
ENSMUSG00000086596	Susd5	-1.21446	0.0423721	0.130006	0.179691	0.478143	0.36908	0.28876	0.0647387	0.32719	0.0596561	0.0975978
ENSMUSG00000070547	Mrgprb1	-1.22139	0.000731448	0.00544987	0.908433	0.879152	0.885208	1.09723	0.457916	0.551373	0.436516	0.111089
ENSMUSG00000018486	Wnt9b	-1.26641	0.0124695	0.0514262	0.177153	0.249292	0.208465	0.17855	0.0877584	0.0537615	0.0943465	0.0882009
ENSMUSG00000021575	Ahrr	-1.26964	0.0125902	0.051814	0.261613	0.235613	0.14777	0.170375	0.103678	0.0476357	0.107481	0.0651258
ENSMUSG00000034683	Ppp1r1c	-1.27602	0.0340425	0.109861	0.557902	0.281548	0.362214	0.268472	0.266844	0.227692	0.0351277	0.0574692
ENSMUSG00000053101	Gpr141	-1.27748	0.0218772	0.0786241	0.291428	0.240593	0.493832	0.234981	0.192491	0.176882	0.0354756	0.0967307
ENSMUSG00000062524	Ncr1	-1.29104	0.000639534	0.00487106	1.69534	1.70766	1.05	1.36973	0.795637	0.609267	0.570244	0.310975
ENSMUSG00000030792	Dkkl1	-1.29132	1.34e-05	0.000200425	17.5308	12.2857	15.0827	18.5241	4.37096	4.70357	11.0764	4.62422
ENSMUSG00000043463	Rab9b	-1.3439	0.0372648	0.117574	0.184342	0.226392	0.110434	0.155912	0.0996212	0.0305144	0.0917999	0.0333745
ENSMUSG00000026205	Slc23a3	-1.35425	0.0168525	0.0646901	0.388721	0.510546	0.457429	0.271237	0.0962827	0.265426	0.118298	0.129024
ENSMUSG00000038583	Pln	-1.35426	0.00516748	0.0260347	0.485805	0.579075	0.564947	0.451971	0.254815	0.286187	0.18263	0.0569111
ENSMUSG00000001827	Folr1	-1.36336	6.81e-18	2.12e-15	30.6314	26.3061	38.2095	36.2015	14.0418	11.5157	13.635	9.71191
ENSMUSG00000091472	Gm3739	-1.36841	0.0217158	0.0782586	0.398	0.298704	0.499571	0.246854	0.197162	0.150979	0.0908413	0.099078
ENSMUSG00000028004	Npy2r	-1.37477	3.25e-07	8.42e-06	1.28876	2.09814	1.41856	1.32812	0.471453	0.703989	0.543049	0.552803
ENSMUSG00000029669	Tspan12	-1.39188	4.63e-20	2.19e-17	7.50019	6.78495	6.58158	6.60403	2.36197	2.9996	2.69009	2.00046
ENSMUSG00000050777	Tmem37	-1.40715	4.78e-05	0.00057388	9.46289	12.4858	12.74	15.1937	5.69586	5.92877	5.20223	1.31716
ENSMUSG00000071722	Spin4	-1.43296	6.65e-07	1.55e-05	0.751213	0.845693	0.902801	0.892206	0.237534	0.451098	0.262662	0.254648
ENSMUSG00000070287	Slc35g2	-1.45336	5.14e-09	2.27e-07	3.73342	2.45567	3.27771	3.00508	1.20527	1.18392	1.14894	0.835412
ENSMUSG00000005339	Fcer1a	-1.45778	0.000985392	0.00696172	1.4703	1.95617	2.07622	1.49225	0.59593	1.03437	0.61016	0.199645
ENSMUSG00000036172	Cd200r3	-1.46448	0.038412	0.120517	0.103248	0.154978	0.210595	0.0960572	0.017049	0.0469997	0.062842	0.06854
ENSMUSG00000073062	Zxdb	-1.46547	3.48e-13	4.77e-11	2.12475	1.51002	2.17904	2.12033	0.646826	0.940194	0.585206	0.590989
ENSMUSG00000074650	Gm10735	-1.50719	0.0178103	0.0673059	0.13598	0.204109	0.426706	0.316274	0.134724	0.123799	0.0413822	0.0677016
ENSMUSG00000078160	Gm16503	-1.53197	0.00523668	0.0263007	0.325059	0.297328	0.516395	0.207914	0.0805142	0.0554891	0.166934	0.14161
ENSMUSG00000030237	Slco1a4	-1.56146	0.00263995	0.0153617	1.44806	1.90516	0.837635	0.649259	0.639559	0.365326	0.509706	0.0694902
ENSMUSG00000024261	Syt4	-1.578	0.0408248	0.126425	0.102586	0.115488	0.160958	0.0795346	0.0338795	0.0155662	0.0468295	0.0510756
ENSMUSG00000009670	Tex11	-1.57966	0.000698945	0.00525076	0.569722	0.572657	0.325633	0.454323	0.181433	0.111147	0.241495	0.0810437
ENSMUSG00000048001	Hes5	-1.60904	5.68e-05	0.000662094	4.08677	6.6652	5.22837	5.50823	0.882478	0.81092	3.20494	1.82603
ENSMUSG00000040138	Ndp	-1.64219	0.00635031	0.0305973	0.275186	0.542143	0.388591	0.38403	0.136322	0.156585	0.125619	0.0685047
ENSMUSG00000027446	9230104L09Rik	-1.64559	9.74e-05	0.00104446	2.72443	3.63506	1.99483	4.03673	1.0997	1.28613	0.921239	0.502385
ENSMUSG00000045555	Mettl24	-1.66632	0.000956452	0.00678969	0.479843	0.883951	0.780252	1.13635	0.302534	0.317717	0.159304	0.217185
ENSMUSG00000110344	Gm45716	-1.69067	3.03e-05	0.000392318	1.60916	0.887288	1.36029	0.733269	0.260294	0.418577	0.419751	0.261606
ENSMUSG00000056399	Prss34	-1.73958	0.00515508	0.0259944	0.713056	0.370494	0.877818	0.561334	0.163031	0.199749	0.250386	0.109236
ENSMUSG00000054204	Alkal2	-1.82703	0.00228898	0.0137147	0.618803	0.796149	0.499322	0.411219	0.175168	0.241446	0.0807077	0.132038
ENSMUSG00000068417	Pnp2	-1.83421	0.000306536	0.00268948	0.729207	0.820919	1.32719	0.723649	0.144494	0.265555	0.2663	0.290446
ENSMUSG00000061171	Slc38a11	-1.84129	0.000583463	0.00452572	0.417908	0.501833	0.603243	0.362883	0.220826	0.126825	0.0763082	0.0832272
ENSMUSG00000043366	Olfr78	-2.00924	0.00842755	0.0382333	0.11365	0.127943	0.0936163	0.118951	0.042225	0.0129337	0.0389099	0.014146
ENSMUSG00000018634	Crhr1	-2.05084	0.00663532	0.0316031	0.325357	0.274708	0.255243	0.252248	0.0805879	0.0246844	0.148522	0
ENSMUSG00000019888	Mgat4c	-2.07039	0.000165031	0.00162006	1.24903	0.984283	0.661409	1.16204	0.293904	0.355358	0.285084	0
ENSMUSG00000015652	Steap1	-2.09398	0.00549454	0.0272924	0.488035	1.40406	0.306292	0.504495	0.10745	0.246844	0.198029	0.0539962
ENSMUSG00000044528	Tram1l1	-2.09606	0.0062035	0.0299963	0.120053	0.135152	0.193746	0.127648	0.016992	0.0624568	0.015658	0.0341555
ENSMUSG00000090691	Gm3667	-2.12626	0.0206831	0.0753298	0.292393	0.0731483	0.122338	0.483608	0.032188	0.0887339	0.0296609	0.0647007
ENSMUSG00000050425	Mrgprb2	-2.18236	0.000216737	0.00202818	0.610142	0.46997	0.393003	0.657277	0.0636322	0.23389	0.0879546	0.0639531
ENSMUSG00000032034	Kcnj5	-2.39458	9.33e-10	5.22e-08	0.69759	1.20203	0.723724	0.887416	0.0987352	0.181458	0.27295	0.0850569
ENSMUSG00000045589	Frrs1l	-2.48914	0.0439172	0.133429	0.0293523	0.0220293	0.0184215	0.0910267	0.00969371	0.00890767	0.00893266	0
ENSMUSG00000045502	Hcar2	-2.54624	0.00259458	0.0151433	0.207352	0.466861	0.325336	0.385821	0.0342394	0.031463	0.157756	0
ENSMUSG00000032315	Cyp1a1	-2.55532	0.00158769	0.010243	3.90742	0.167045	0.535471	0.36813	0.220519	0.135091	0.13547	0.320133
ENSMUSG00000053675	Tgm5	-2.5865	0.00388796	0.0208695	0.127627	0.201151	0.288357	0.142487	0.0252897	0.023239	0.0466084	0.0254173
ENSMUSG00000024903	Lao1	-2.84685	0.0228433	0.0811942	0	0.255723	0.240574	0.290584	0	0.0517016	0.0518467	0
ENSMUSG00000048108	Tmem72	-2.88829	0.0354581	0.113296	0.0155546	0.00875545	0.00732157	0.0253248	0	0	0.00355025	0.00387216
ENSMUSG00000028584	Lrrc38	-3.03312	0.0345221	0.110875	0.143499	0.161546	0.13509	0.0267009	0	0	0.0524044	0
ENSMUSG00000033981	Gria2	-3.17768	0.000192905	0.00183942	0.128624	0.0434404	0.0726523	0.1077	0.0191154	0	0	0.0192118
ENSMUSG00000095932	Vmn1r49	-3.25397	0.0488401	1	0.04251	0	0.0500237	0.029662	0	0.00967552	0	0
ENSMUSG00000025333	Gpr143	-3.60524	0.00971157	0.0426987	0.126163	0.094687	0.19795	0.195627	0	0	0.0383947	0
ENSMUSG00000050578	Mmp13	-3.75305	0.00226437	0.0136018	0.174668	0.168545	0.164433	0.162503	0.0494441	0	0	0
ENSMUSG00000002100	Mybpc3	-4.25519	0.00541729	0.0270083	0.0160216	0.0721468	0.0603313	0.0745291	0	0	0	0
ENSMUSG00000002588	Pon1	-4.26293	2.86e-06	5.33e-05	1.29595	0.437682	1.01667	0.562656	0.128398	0	0.0394391	0
ENSMUSG00000050097	Ces2b	-4.37808	0.000990193	0.00698548	0.0391421	0.17626	0.184242	0.0910401	0	0	0.0178679	0
